# Supplementary material
Source: PubMed Central journal article supplement (PMC3737318)
Supplement: NIHMS474659-supplement-1.pdf [file NIHMS474659-supplement-1.pdf]

Journal: **Nature Medicine**

**ETS factors reprogram the androgen receptor cistrome and prime prostate tumorigenesis in response to PTEN loss**

Yu Chen, Ping Chi, Shira Rockowitz, Phillip J. Iaquinta, Tambudzai Shamu, Shipra Shukla, Dong Gao, Inna Sirota, Brett S. Carver, John Wongvipat, Howard I. Scher, Deyou Zheng, Charles L. Sawyers\*

| <b>Supplementary Item &amp; Number</b> | <b>Title</b>                                                                                                                                                                                             |
|----------------------------------------|----------------------------------------------------------------------------------------------------------------------------------------------------------------------------------------------------------|
| Supplementary Figure 1                 | Gene targeting strategy                                                                                                                                                                                  |
| Supplementary Figure 2                 | EGFP IHC of 8-week old mice                                                                                                                                                                              |
| Supplementary Figure 3                 | Invasive prostate cancer in 8-week old mouse.                                                                                                                                                            |
| Supplementary Figure 4                 | IHC of basal and luminal markers.                                                                                                                                                                        |
| Supplementary Figure 5                 | IHC of poorly differentiated adenocarcinoma                                                                                                                                                              |
| Supplementary Figure 6                 | Genomic distribution of ERG and AR ChIP-seq peaks                                                                                                                                                        |
| Supplementary Figure 7                 | Comparison of ChIP-seq peaks of wild-type ( <i>WT</i> ) and <i>R26<sup>ERG</sup></i> mouse prostates and homologous genes in VCAP and LNCaP cells at the <i>Tmprss2</i> locus                            |
| Supplementary Figure 8                 | Comparison of ChIP-seq peaks of wild-type ( <i>WT</i> ) and <i>R26<sup>ERG</sup></i> mouse prostates and homologous genes in VCAP and LNCaP cells at the <i>Fkbp5</i> locus                              |
| Supplementary Figure 9                 | Venn diagram of ERG ChIP-seq peak overlap and ERG-bound gene overlap in <i>Pten<sup>WT</sup>;R26<sup>ERG</sup></i> ( <i>R26<sup>ERG</sup></i> ) and <i>Pten<sup>ff</sup>;R26<sup>ERG</sup></i> prostates |
| Supplementary Figure 10                | ChIP-seq profile of ERG, AR, and H3K4me1 at the <i>Dusp6</i> , <i>Tmprss2</i> , and <i>Fkbp5</i> locus of <i>Pten<sup>ff</sup></i> and <i>Pten<sup>ff</sup>;R26<sup>ERG</sup></i> prostates              |
| Supplementary Figure 11                | ChIP-qPCR of AR and ERG                                                                                                                                                                                  |
| Supplementary Figure 12                | ERG expression and AKT phosphorylation status in mouse prostates                                                                                                                                         |
| Supplementary Figure 13                | Serum testosterone levels.                                                                                                                                                                               |
| Supplementary Figure 14                | MEME motif analysis of mouse prostate ChIP-Seq.                                                                                                                                                          |
| Supplementary Figure 15                | Gene expression analysis of <i>ERG</i> expression in <i>Pten<sup>WT</sup></i> type and <i>Pten<sup>ff</sup></i> prostate                                                                                 |
| Supplementary Figure 16                | Cistrome and transcriptome integration of mouse prostates                                                                                                                                                |
| Supplementary Figure 17                | Integration of H3K4me3 peaks with gene expression                                                                                                                                                        |
| Supplementary Figure 18                | Expression profile of castrate and intact <i>Pten</i> loss mouse prostates                                                                                                                               |
| Supplementary Figure 19                | Examples of gene expression of AR regulated genes <i>Pbsn</i> , <i>Nkx3-1</i> , and <i>Msbm</i> and <i>H3K4me3</i> ChIP-seq profile                                                                      |
| Supplementary Figure 20                | ChIP-seq profiles at <i>FKBP5</i> and <i>TMEPA1</i> locus                                                                                                                                                |
| Supplementary Figure 21                | ChIP-qPCR of AR IP in LNCaP cells                                                                                                                                                                        |
| Supplementary Figure 22                | Heatmap of change in expression of AR signature genes induced by two <i>ETV1</i> hairpins and by R1881 in LNCaP cells.                                                                                   |
| Supplementary Figure 23                | Expression of <i>ERG</i> , <i>ETV1</i> , and <i>PTEN</i> in University of Michigan and MSKCC datasets.                                                                                                   |
| Supplementary Table 1                  | ChIP-seq overlap table                                                                                                                                                                                   |
| Supplementary Table 2                  | DREME Motif Analysis                                                                                                                                                                                     |
| Supplementary Table 3                  | ERG-regulated Genes in <i>Pten</i> wild-type prostates                                                                                                                                                   |
| Supplementary Table 4                  | ERG-regulated genes in <i>Pten</i> loss prostates                                                                                                                                                        |
| Supplementary Table 5                  | GSEA of ERG profile in <i>Pten</i> loss prostates                                                                                                                                                        |
| Supplementary Table 6                  | DAVID Gene Ontology Analysis                                                                                                                                                                             |
| Supplementary Table 7                  | IPA Functional Annotation                                                                                                                                                                                |
| Supplementary Table 8                  | GSEA of ETV1 Knockdown Profile in LNCaP Cells                                                                                                                                                            |

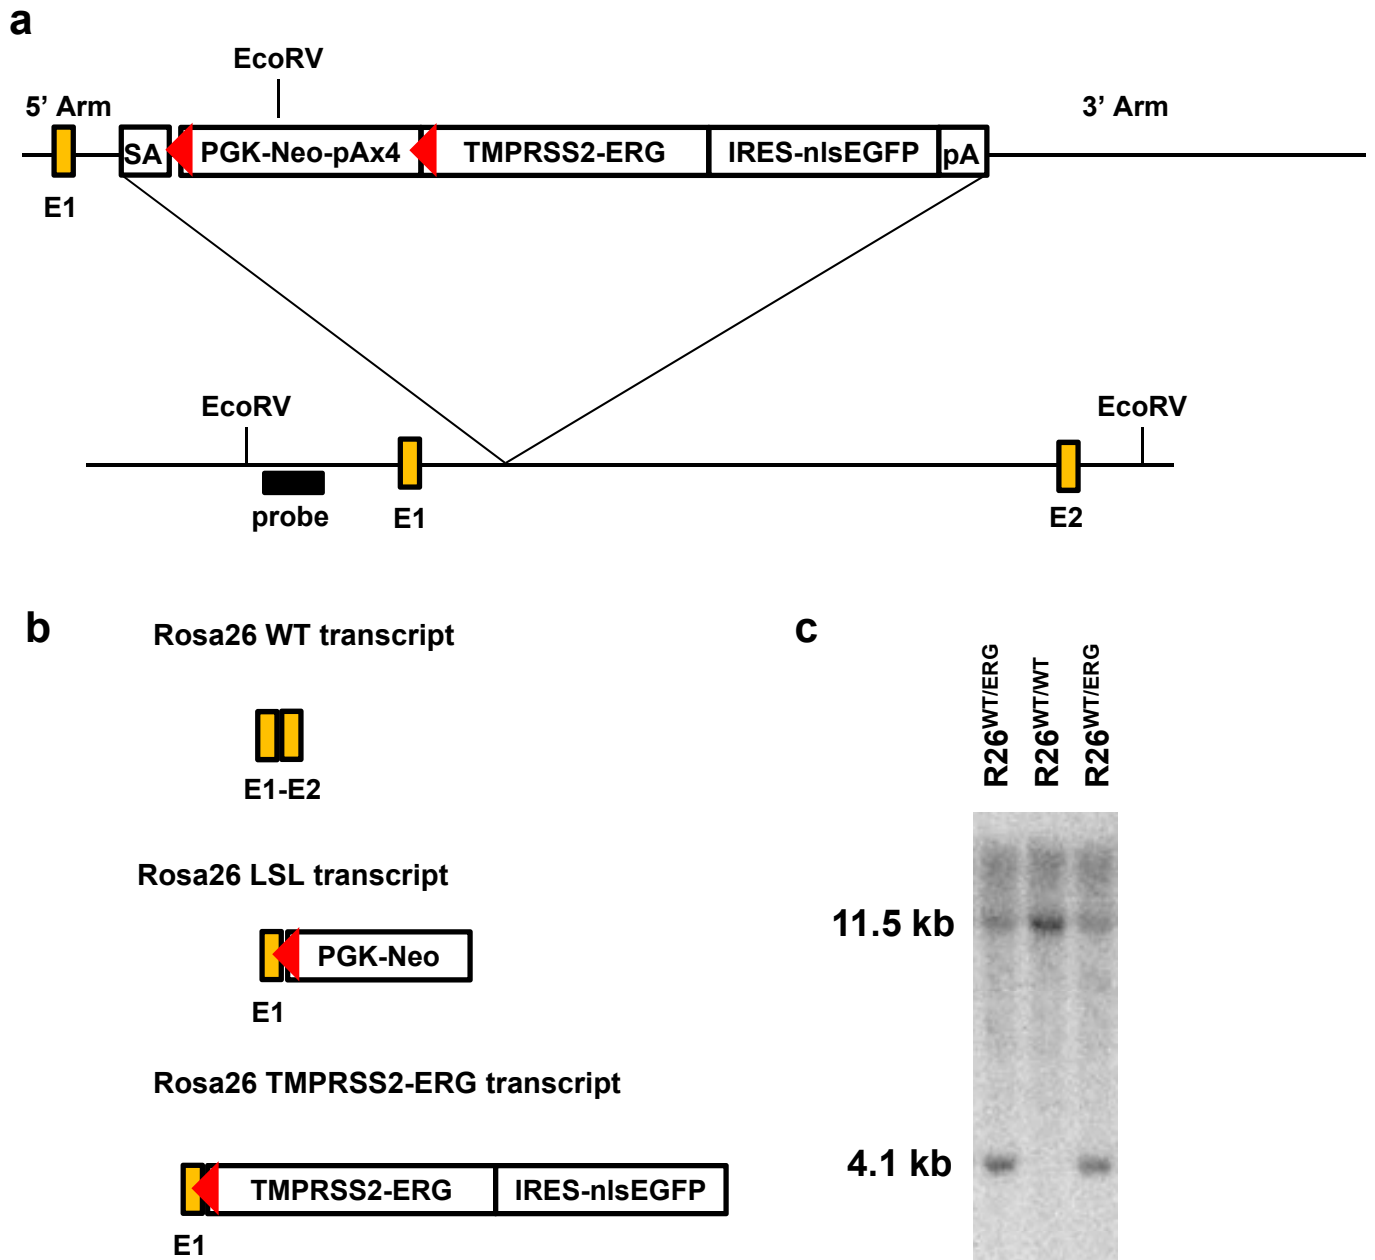

**Supplementary Figure 1. Gene targeting strategy.** (a) A sequence containing a splice acceptor (SA), followed by a transcriptional STOP (four consecutive poly A) between inverted LoxP sites, followed by the TMPRSS2-ERG cDNA, IRES, EGFP with 3 nuclear localization sequence was inserted in the intron between exon1 and exon2 of the non-coding Rosa26 gene. (b) Schematic of the endogenous Rosa26 transcript, targeted transcript prior to Cre mediated deletion of the STOP cassette, and targeted transcript expressing the transgene. (c) Southern blotting of ES cell genomic DNA digested with EcoRV showing correct targeting in two of three clones.

AP

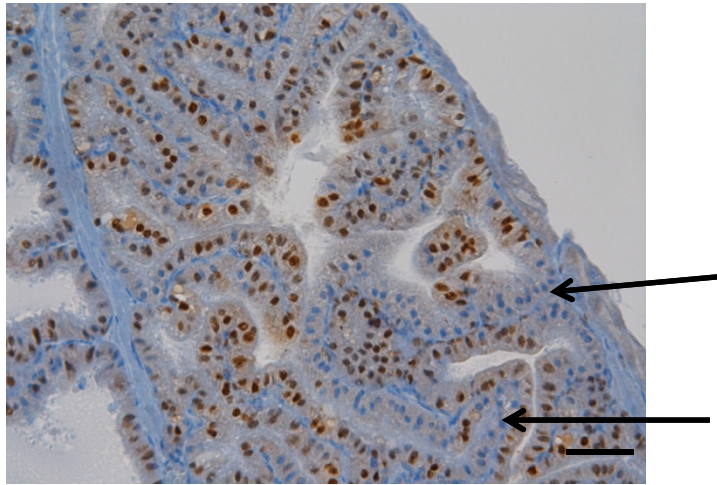

VP

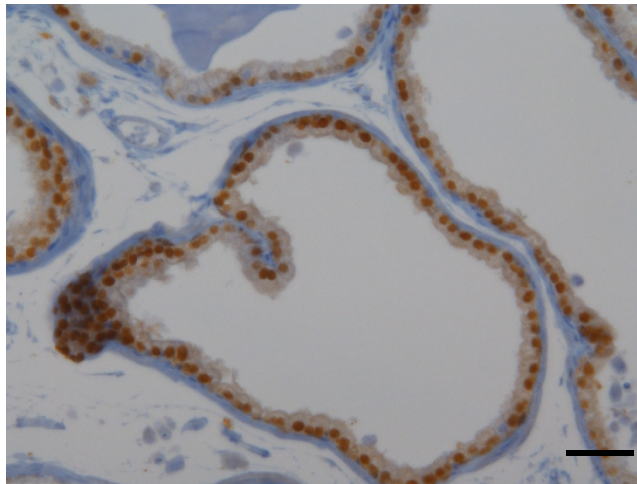

DLP

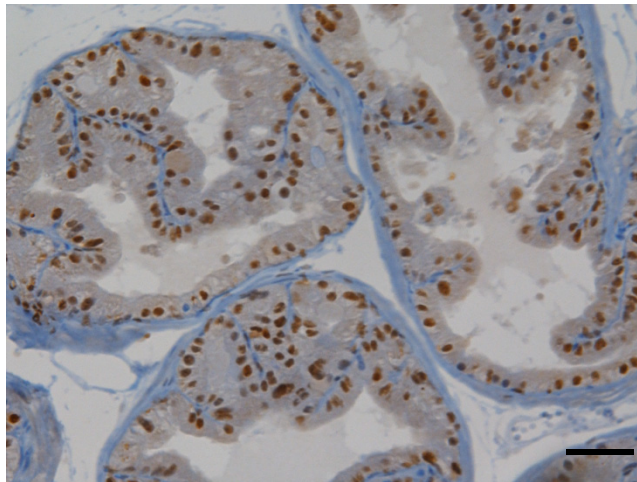

**Supplementary Figure 2. EGFP IHC of 8-week old mice.** Prostates of 8-week old *Pb-Cre4;R26<sup>ERG</sup>* mice were examined by EGFP IHC to assess for ERG expression through Cre-mediated excision of the STOP cassette. At this time point, the anterior lobe (AP) demonstrated incomplete expression (Arrows point to EGFP negative nuclei) whereas the ventral (VP) and dorsolateral lobes (DLP) showed uniform expression. Scale bars: 50 $\mu$ m.

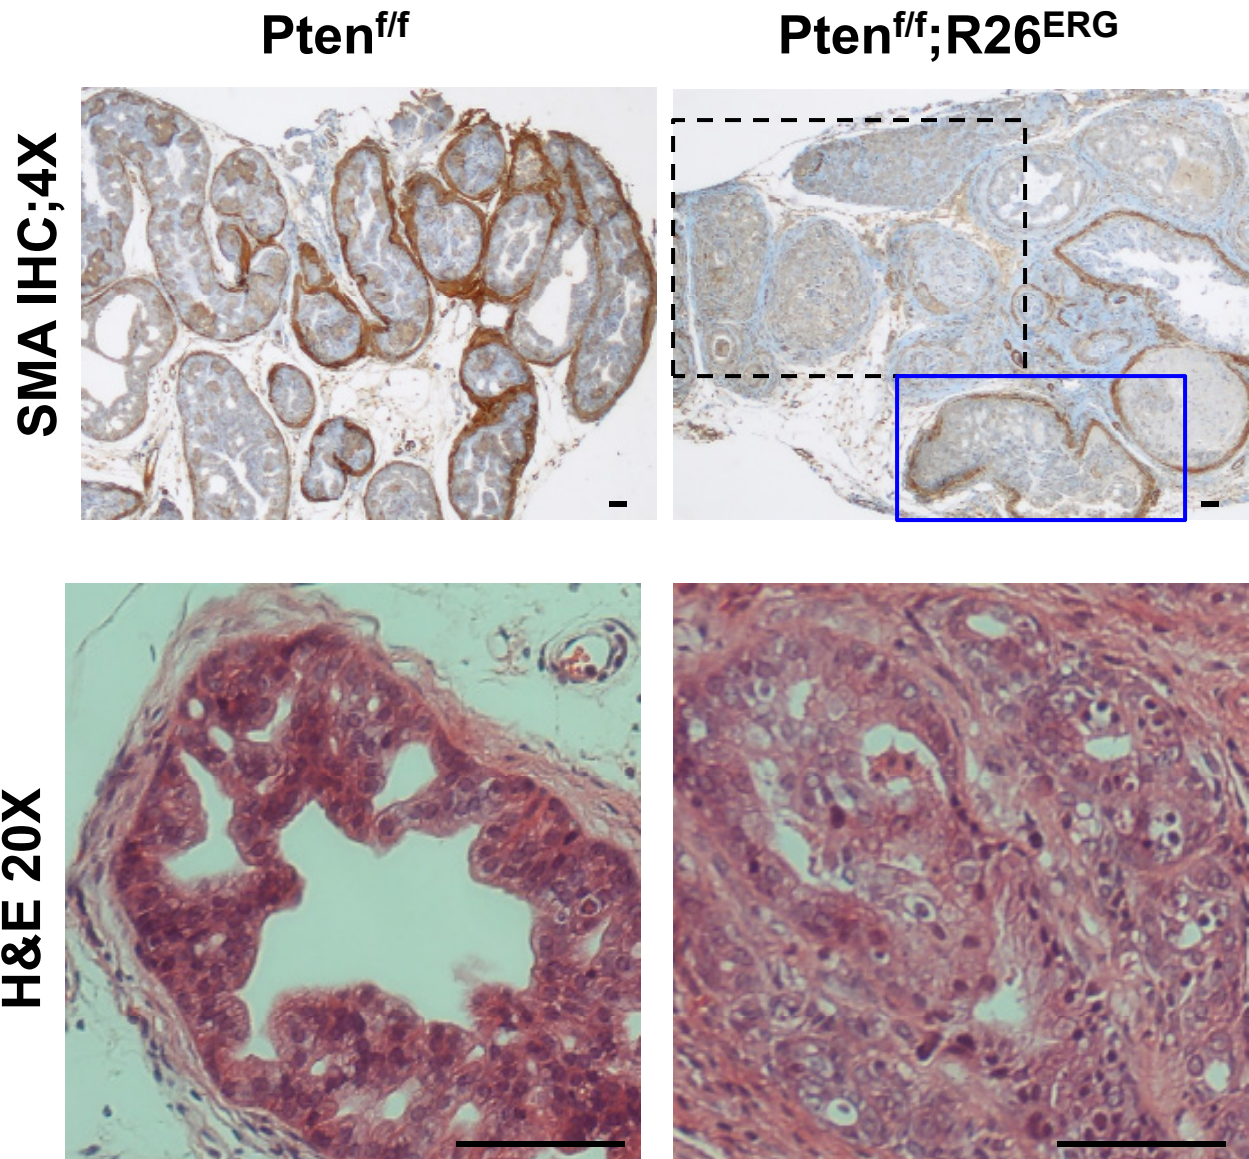

**Supplementary Figure 3. Invasive prostate cancer in 8-week old mouse.** H&E and SMA IHC of 8-week old *Pten*<sup>ff</sup> and *Pten*<sup>ff</sup>;R26<sup>ERG</sup> mice. This is an example of early invasive disease in *Pten*<sup>ff</sup>;R26<sup>ERG</sup>. Invasive adenocarcinoma is clearly appreciated at low power by loss of smooth muscle actin (SMA) that surrounds non-invasive glands (black dashed box outline invasive regions and blue solid box outlines a non-invasive gland). Higher power view shows that the cells of the invasive regions display increased nuclear pleomorphism. Scale bars: 50µm.

***Pten*<sup>ff</sup> (PIN)**

***Pten*<sup>ff</sup>;R26<sup>ERG</sup> (carcinoma)**

**H&E**

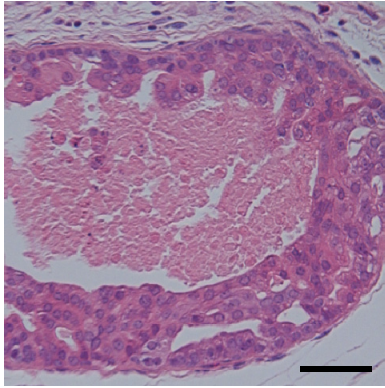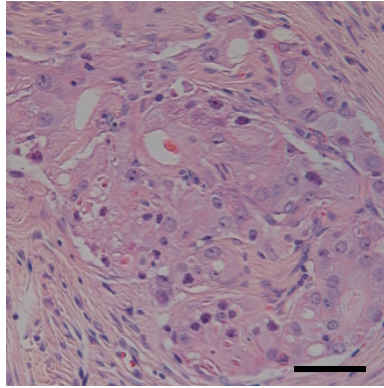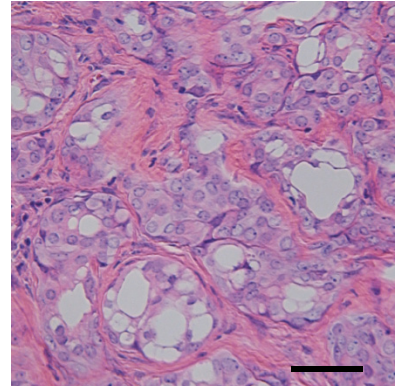

**p63**

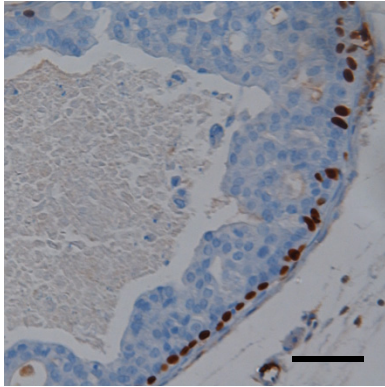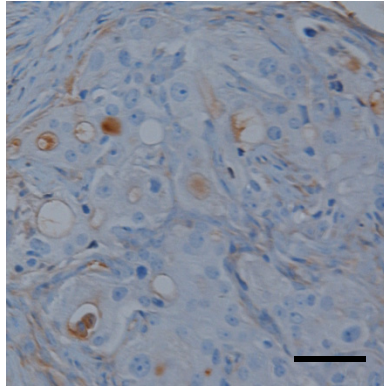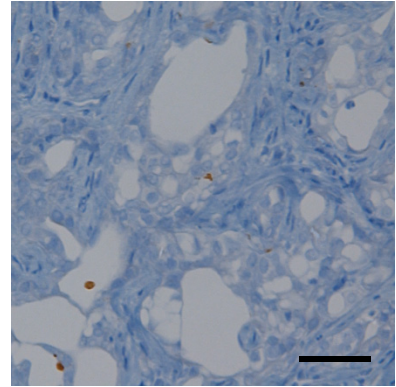

**CK5**

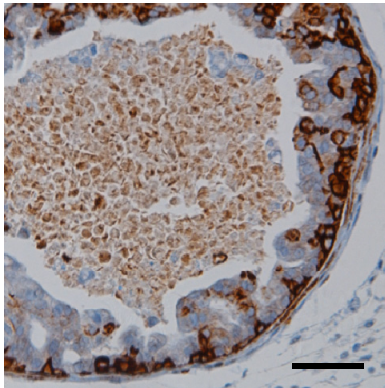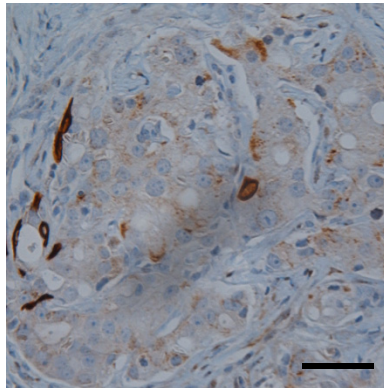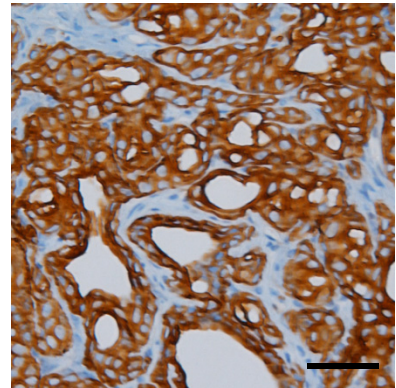

**CK8**

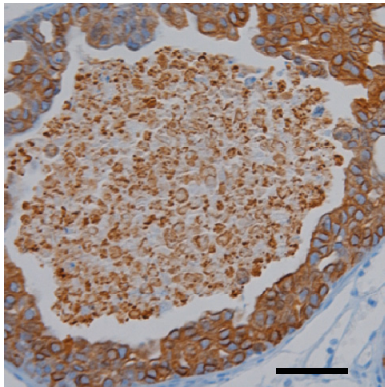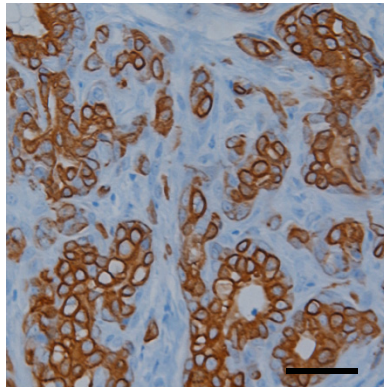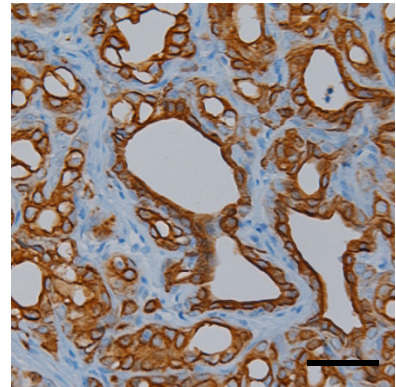

**Supplementary Figure 4. IHC of basal and luminal markers.** Representative H&E and IHC of one 6-month old *Pten*<sup>ff</sup> prostate (PIN, column 1) and two *Pten*<sup>ff</sup>;R26<sup>ERG</sup> prostates (invasive cancer) showing loss of P63, differential CK5 and CK8 positive staining in *Pten*<sup>ff</sup>;R26<sup>ERG</sup> invasive cancer. Scale bars: 50µm.

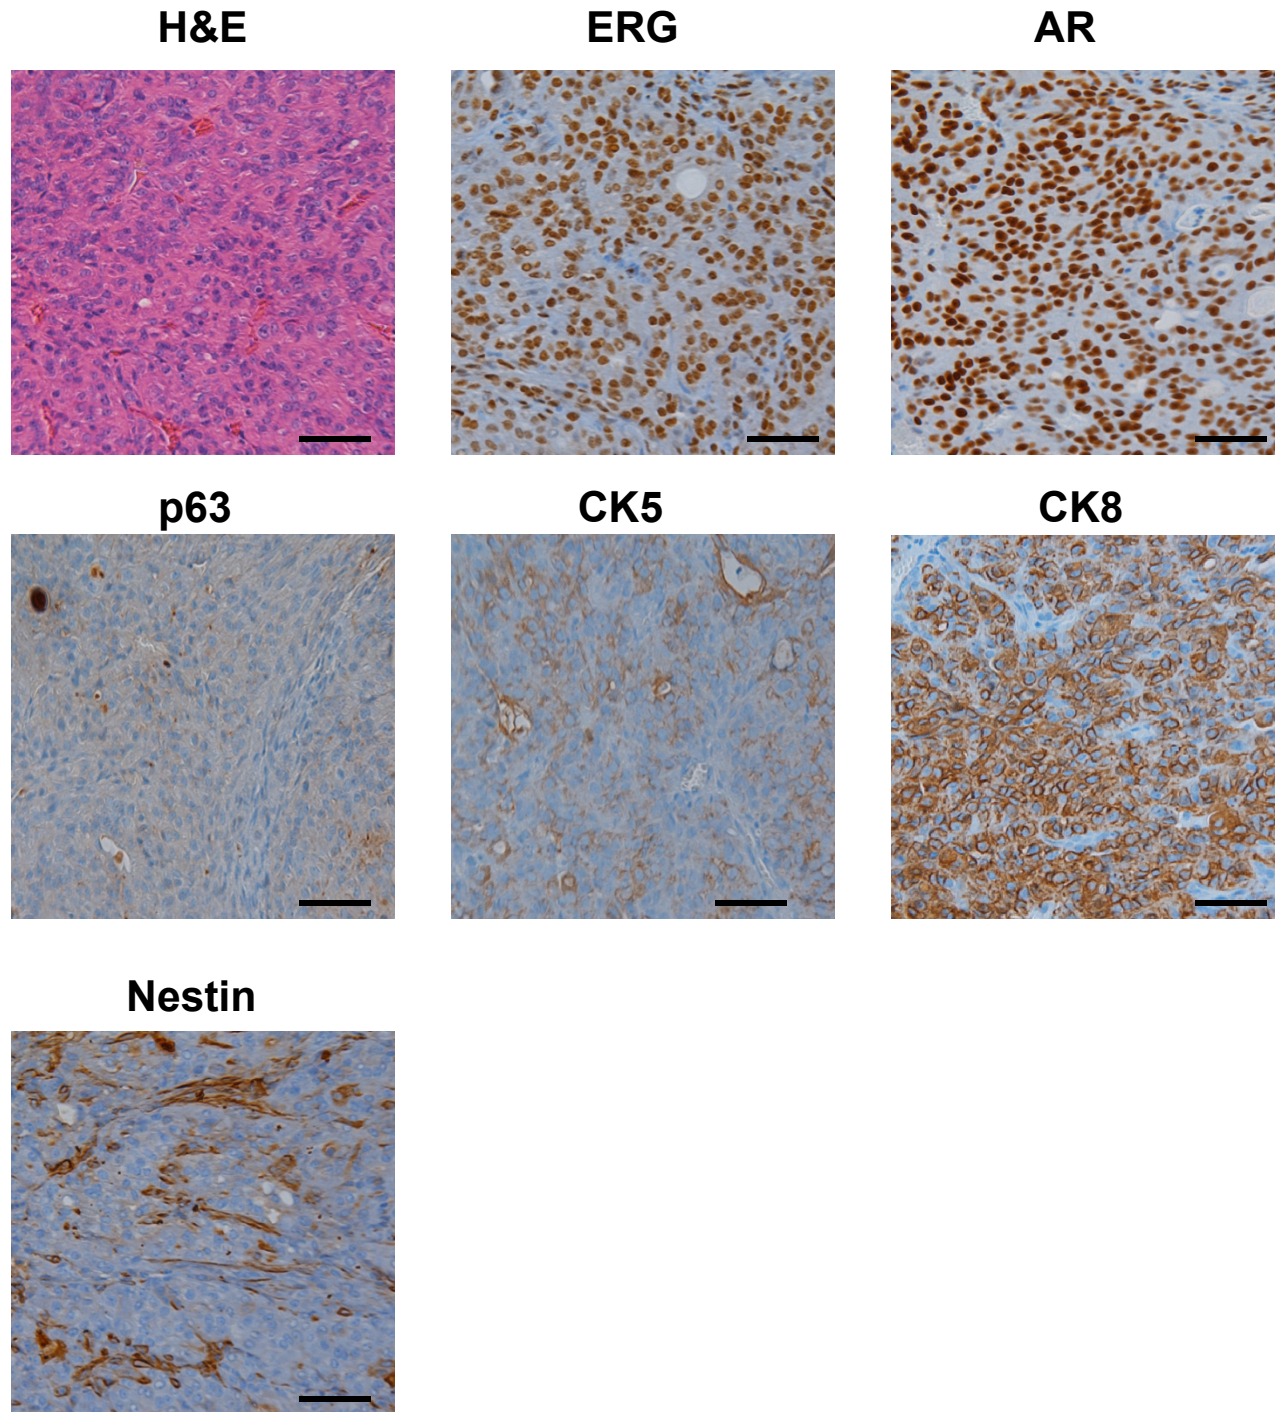

**Supplementary Figure 5. IHC of poorly differentiated adenocarcinoma.** H&E and IHC of 12-month old *Pten<sup>fl/fl</sup> R26<sup>ERG</sup>* mice. IHC shows the tumor stains positive for ERG, AR, and CK8 while it stains negative for p63 and CK5. There is focal nestin staining indicative of focal neuroendocrine differentiation. Scale bars: 50 $\mu$ m.

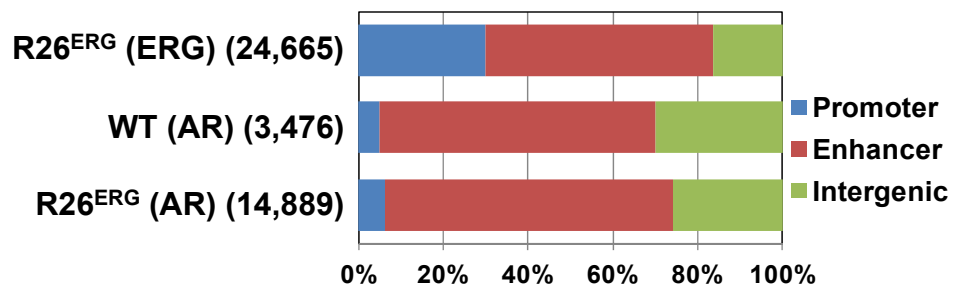

**Supplementary Figure 6. Genomic distribution of ERG and AR ChIP-seq peaks.**

Number of total peaks is indicated in parenthesis. Promoter:  $\pm 2$ kb TSS (transcription start site); Enhancer: -50kb TSS to +5kb TES (transcription end site).



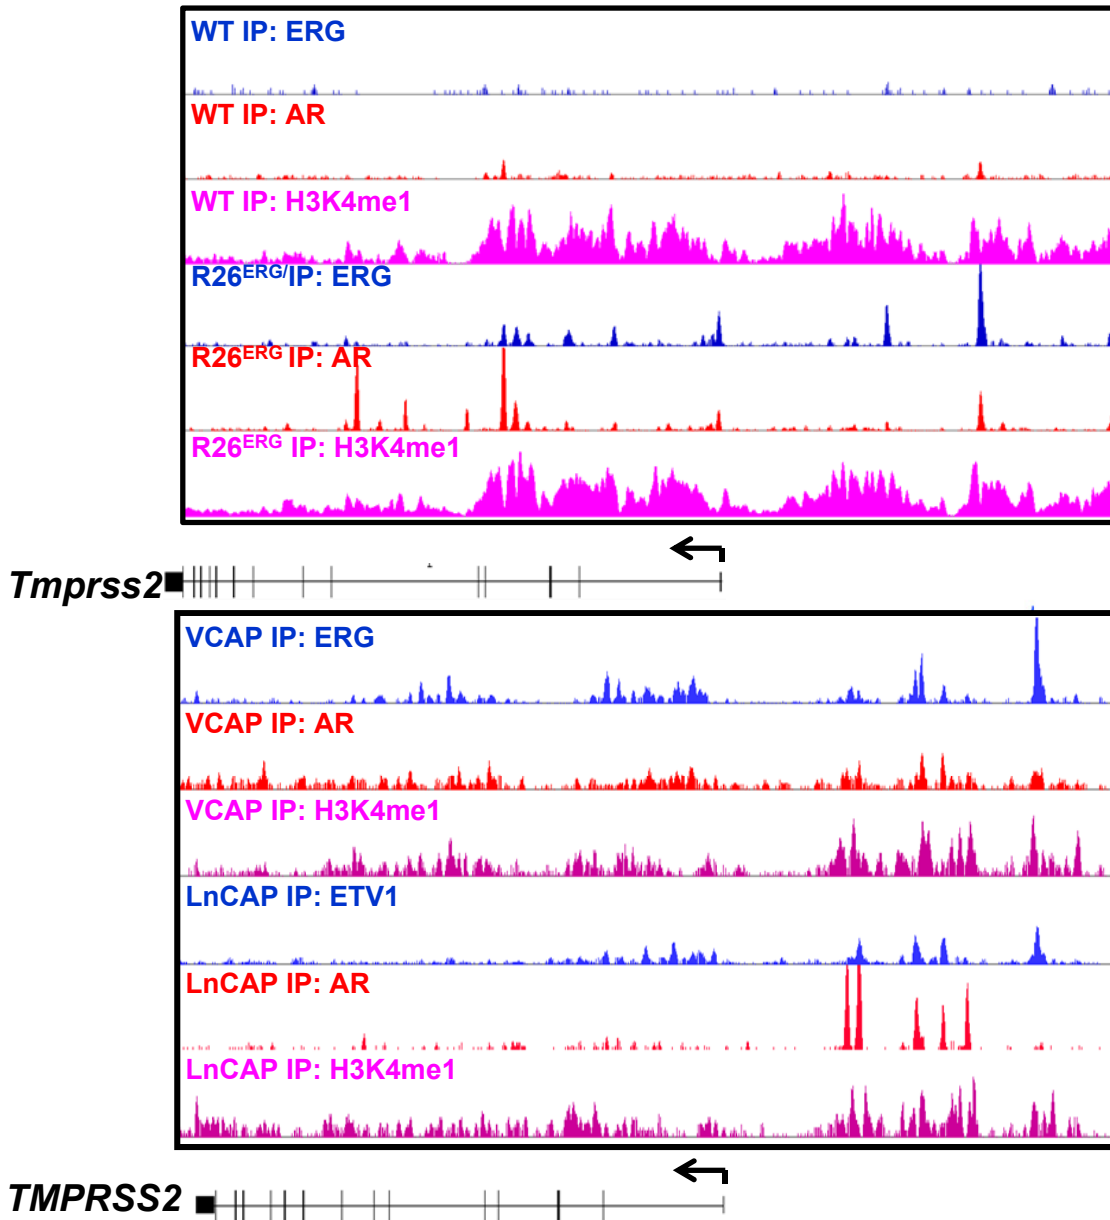

Supplementary Figure 7. Comparison of ChIP-seq peaks of wild-type (*WT*) and *R26<sup>ERG</sup>* mouse prostates and homologous genes in VCAP and LnCAP human prostate cancer cell lines at the *Tmprss2* locus.

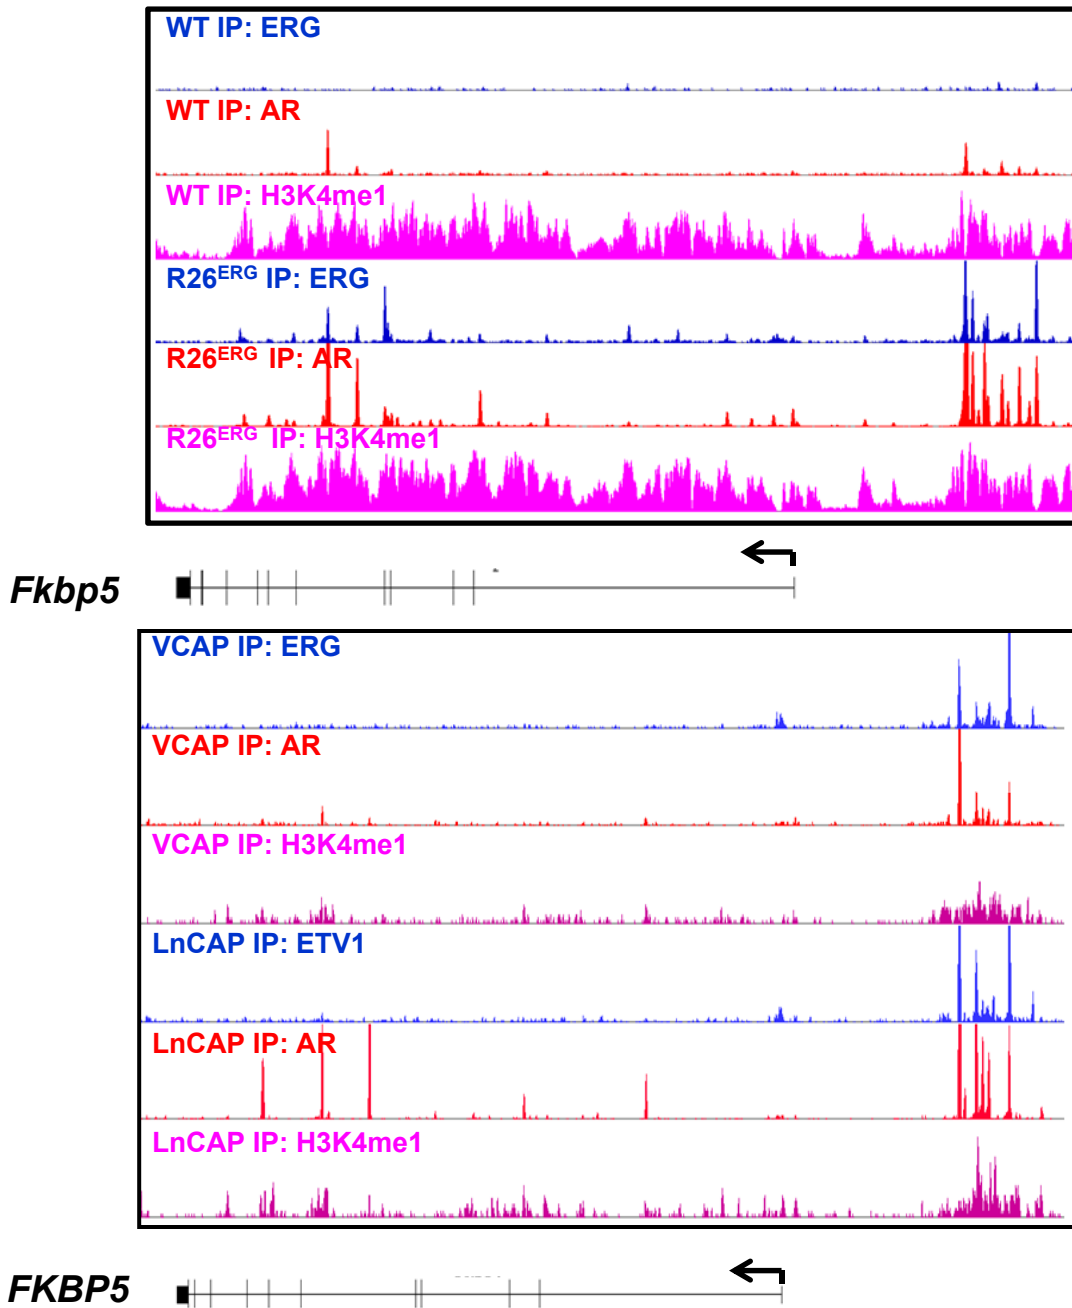

Supplementary Figure 8. Comparison of ChIP-seq peaks of wild-type (*WT*) and *R26<sup>ERG</sup>* mouse prostates and homologous genes in VCAP and LnCAP human prostate cancer cell lines at the *Fkbp5* locus.

### ERG Peaks Overlap

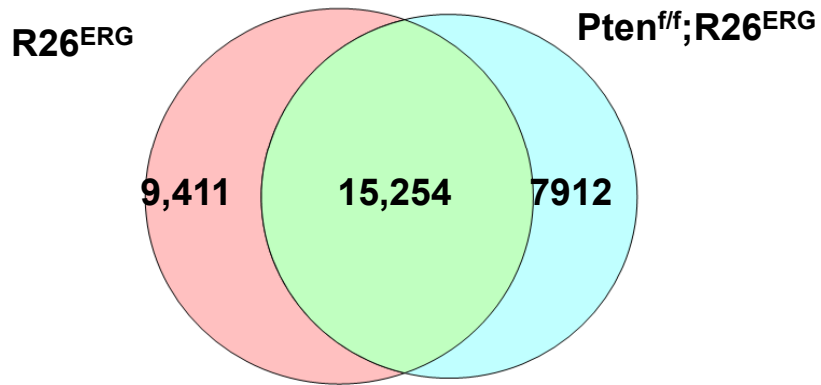

### ERG Gene Overlap

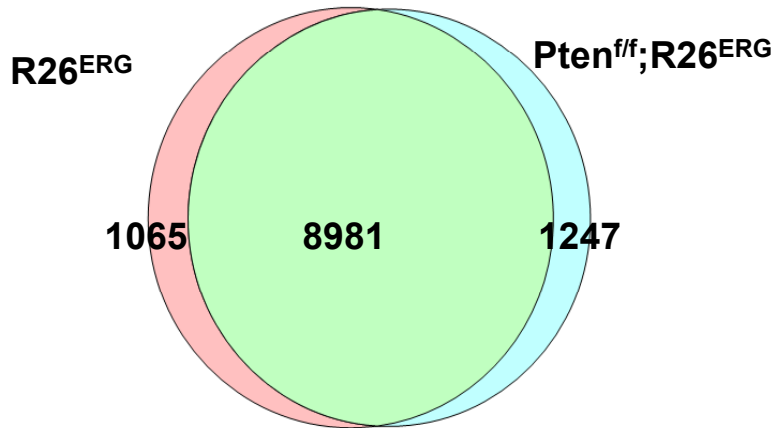

Supplementary Figure 9. Venn diagram of ERG ChIP-seq peak overlap and ERG-bound gene overlap in *Pten<sup>WT</sup>;R26<sup>ERG</sup>* (*R26<sup>ERG</sup>*) and *Pten<sup>ff</sup>;R26<sup>ERG</sup>* prostates.

Normalized ChIP-seq Tag Count

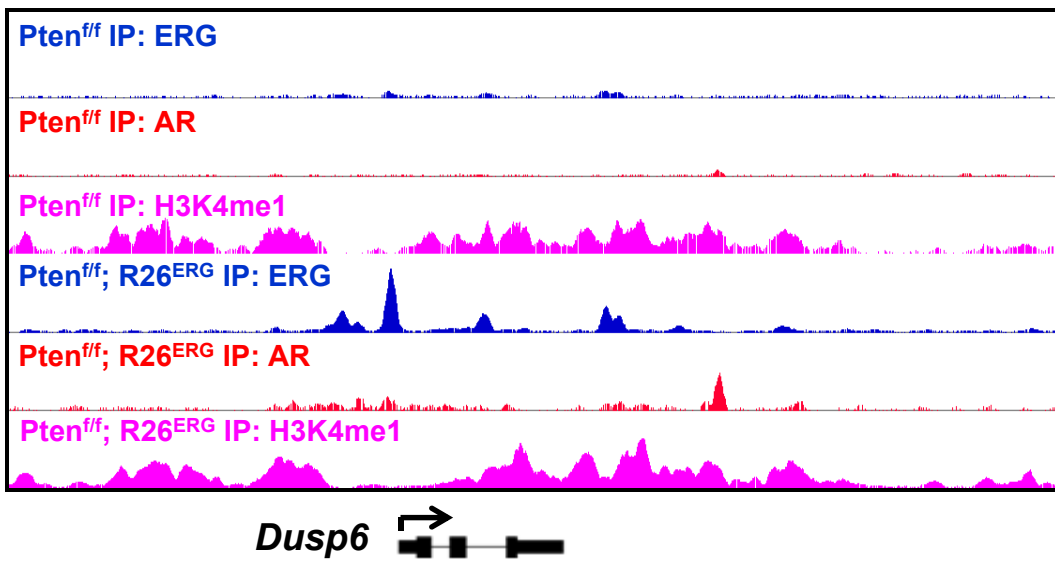

Normalized ChIP-seq Tag Count

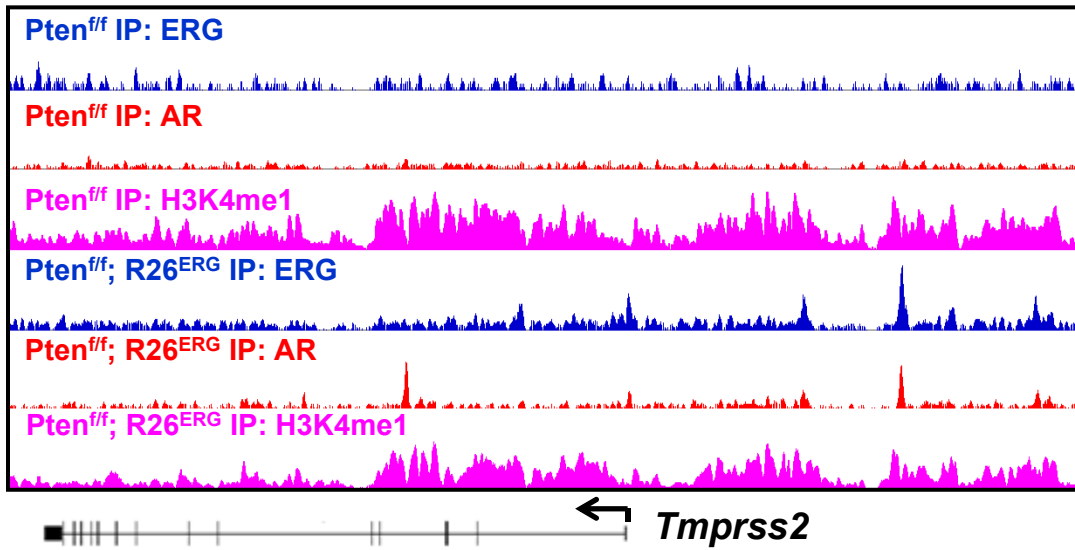

Normalized ChIP-seq Tag Count

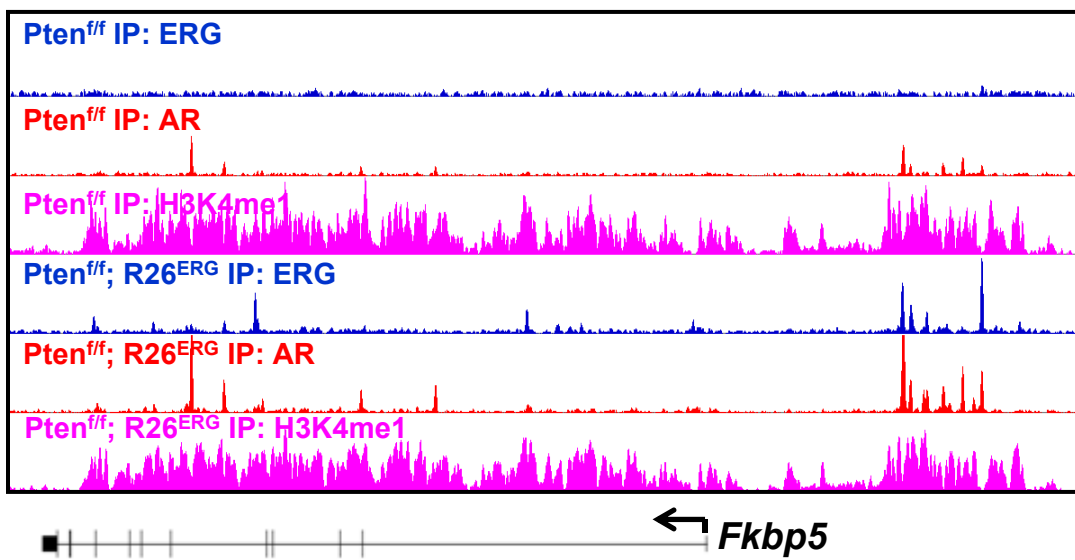

Supplementary Figure 10. ChIP-seq profile of ERG, AR, and H3K4me1 at the *Dusp6*, *Tmprss2*, and *Fkbp5* locus of *Pten<sup>fl/fl</sup>* and *Pten<sup>fl/fl</sup>;R26<sup>ERG</sup>* prostates.

## *Fkbp5* Enhancer

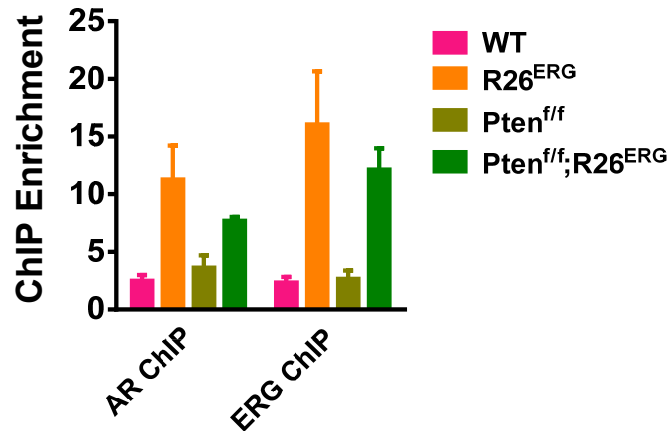

## *Nkx3-1* Enhancer

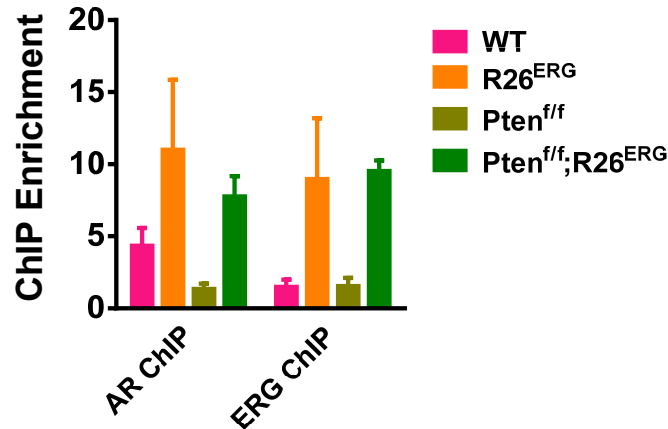

## *Tmprss2* Enhancer

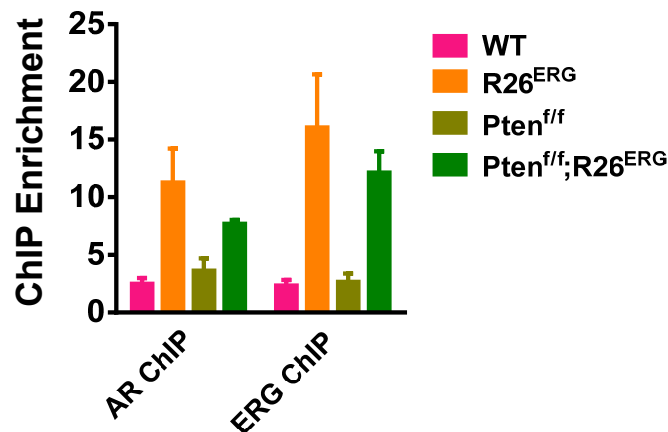

**Supplementary Figure 11. ChIP-qPCR of AR and ERG.** Chromatin from independent set of WT, R26<sup>ERG</sup>, Pten<sup>f/f</sup> and Pten<sup>f/f</sup>;R26<sup>ERG</sup> prostates were immunoprecipitated with anti-AR, anti-ERG, and anti-rabbit IgG antibodies. qPCR was performed at the *Fkbp5*, *Nkx3-1*, and *Tmprss2* enhancers and relative enrichment over IgG is shown (mean ± SD).

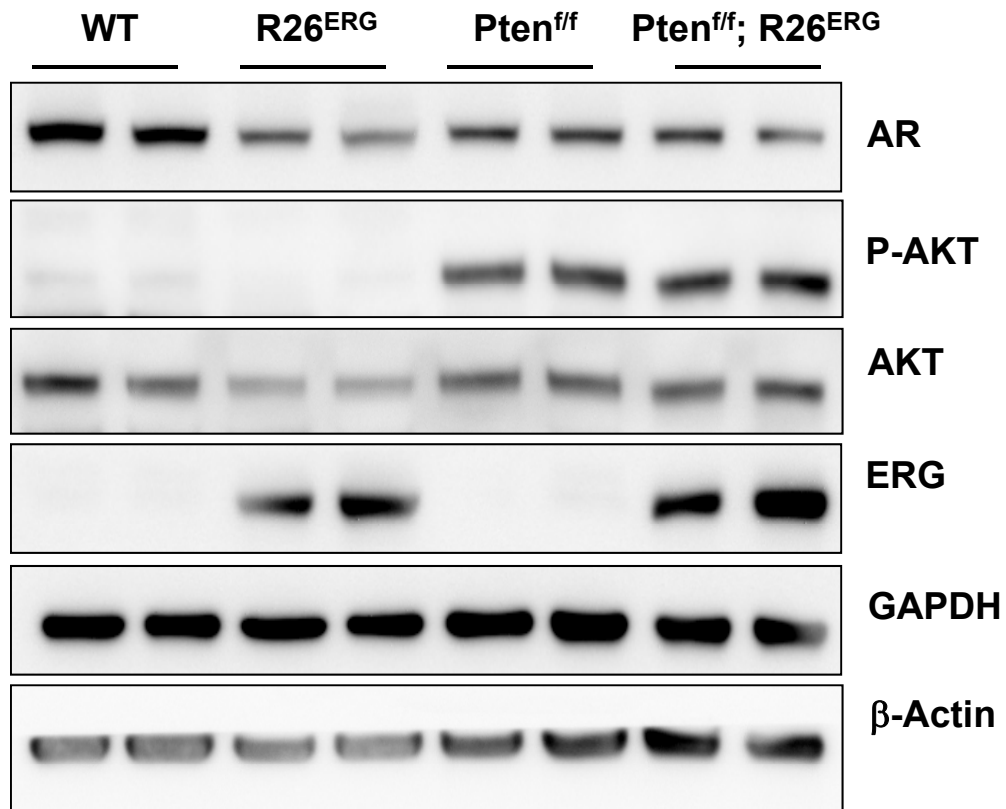

**Supplementary Figure 12. ERG expression and AKT phosphorylation status in mouse prostates.** Western blots of the 6-month old prostate lysates of WT, R26<sup>ERG</sup>, Pten<sup>ff</sup> and Pten<sup>ff</sup>;R26<sup>ERG</sup> mice using the indicated antibody is shown.

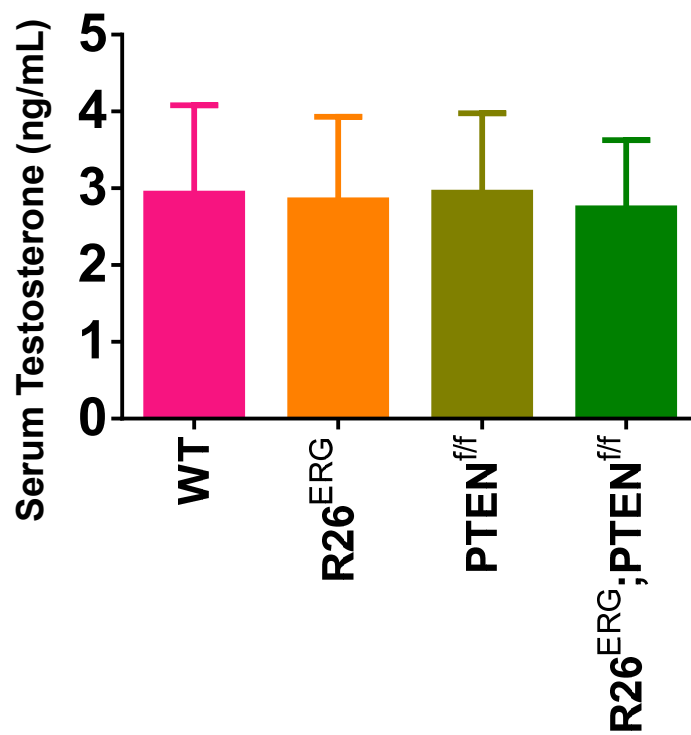

**Supplementary Figure 13. Serum testosterone levels.** Serum testosterone was assayed using ELISA in 6-month old mice ( $n = 6$ , mean  $\pm$  SD).

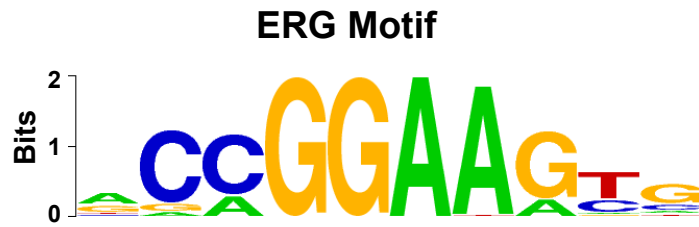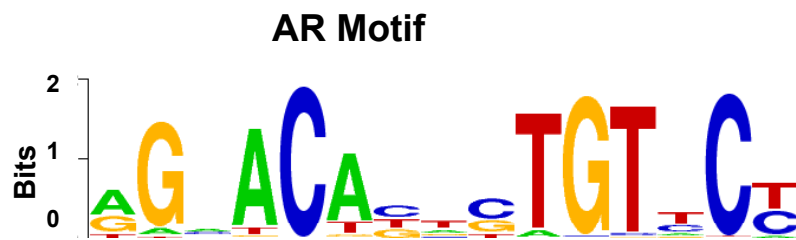

**Supplementary Figure 14. MEME motif analysis of mouse prostate CHIP-Seq.** The consensus sequence motif identified by MEME in the ERG peaks in *R26<sup>ERG</sup>* prostates and in AR peaks in both *WT* and *R26<sup>ERG</sup>* mouse prostates.



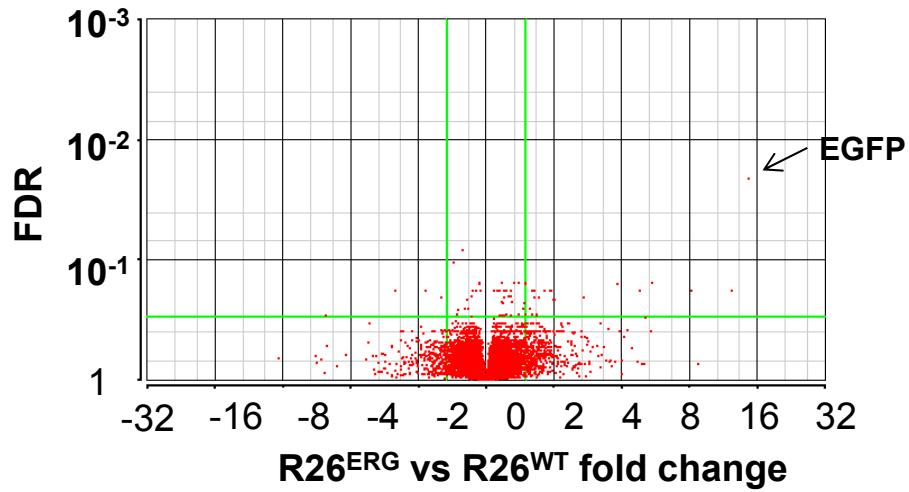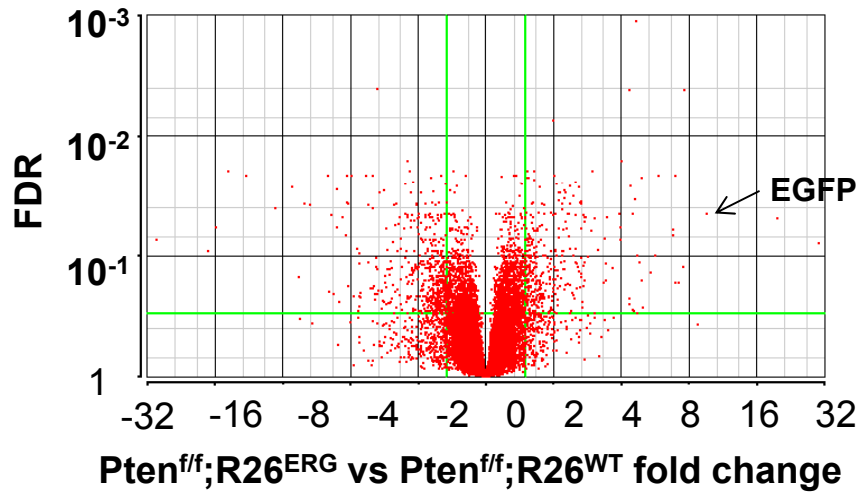

**Supplementary Figure 15. Gene expression analysis of *ERG* expression in *Pten*<sup>WT</sup> type and *Pten*<sup>ff</sup> prostate.** Volcano plots of fold change (x-axis) and FDR (y-axis) showing that only 20 genes are affected by ERG expression in *Pten* wild-type but many more are affected by ERG expression in *Pten* loss. Green lines are FDR=0.3 and fold-change=1.5. The microarray contained a probe for EGFP, which is highly and significantly overexpressed.

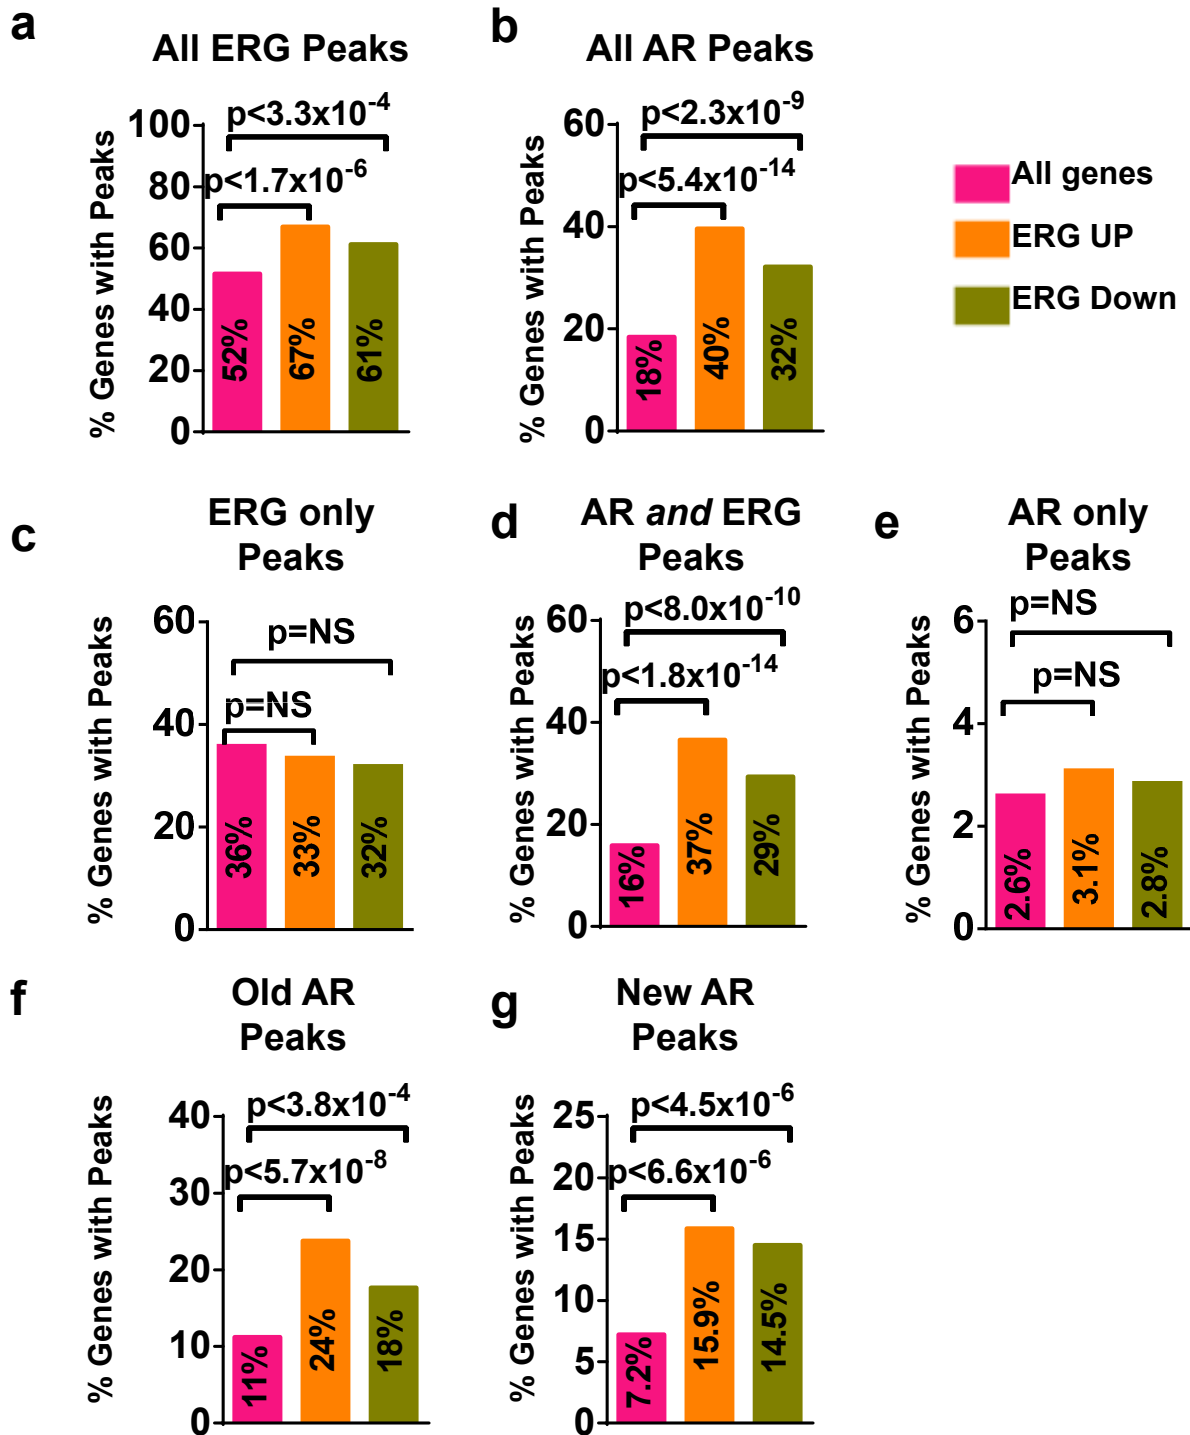

**Supplementary Figure 16. Cistrome and transcriptome integration of mouse prostates.** Plot of percentage of *ERG*-upregulated and down-regulated genes in the *Pten* loss background (*Pten<sup>fl/fl</sup>;R26<sup>ERG</sup>* vs *Pten<sup>fl/fl</sup>*) with ChIP-seq peaks. (a) All ERG peaks are defined by the peaks found in *Pten<sup>fl/fl</sup>;R26<sup>ERG</sup>* mice shows ERG regulated genes are enriched for ERG binding. (b) All AR peaks defined by peaks found in *Pten<sup>fl/fl</sup>;R26<sup>ERG</sup>* mice shows ERG regulated genes are enriched for AR binding. (c-e) ERG only peaks are genes with only ERG peaks, AR and ERG peaks as genes with both, and AR only peaks as genes with only AR peaks. This shows ERG regulated genes are enriched for those with both ERG and AR peaks. (f, g). Old AR peaks as genes in *Pten<sup>fl/fl</sup>* with AR peaks and new AR peaks as genes with AR peaks only in *Pten<sup>fl/fl</sup>;R26<sup>ERG</sup>* mice.

**a**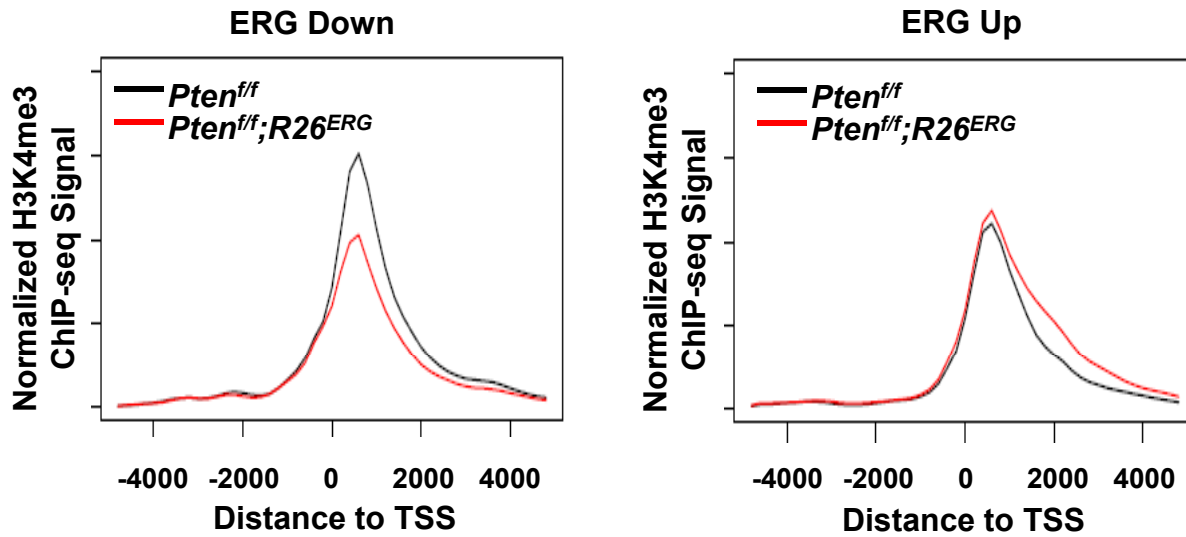**b**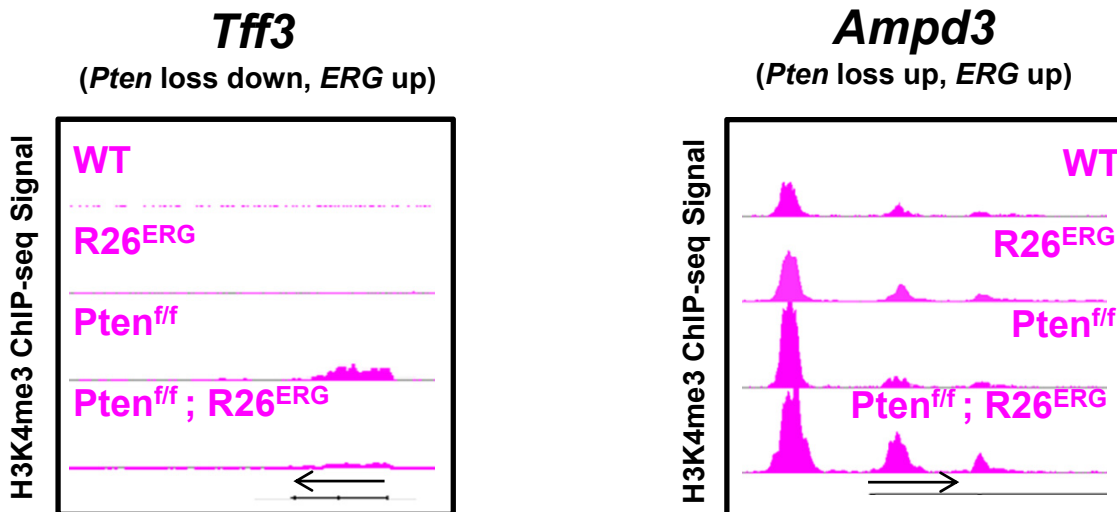

**Supplementary Figure 17. Integration of H3K4me3 peaks with gene expression. (a)** Normalized average H3K4me3 ChIP-seq profile of ERG positive and ERG negative prostates of ERG upregulated and ERG downregulated genes in the setting of *Pten* loss. **(b)** H3K4me3 ChIP-seq profile around the *Tff3* and *Ampd3* genes.

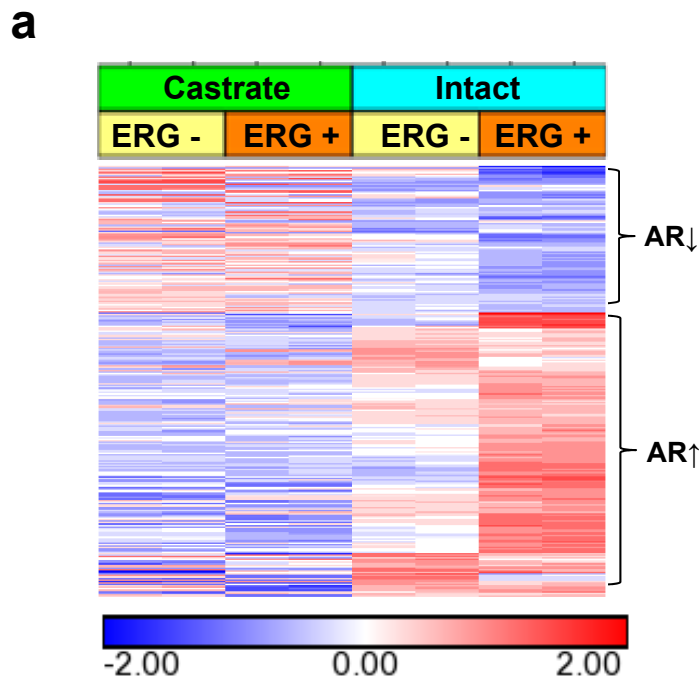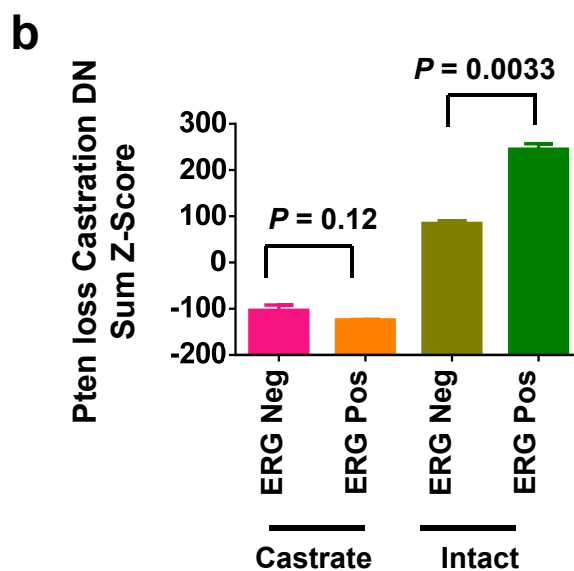

**Supplementary Figure 18. Expression profile of castrate and intact Pten loss mouse prostates.** (a) Intact and two-day castrate six month old *Pten<sup>fl/fl</sup>* and *Pten<sup>fl/fl</sup> R26<sup>ERG</sup>* prostates ( $n = 2$  each) were profiled. Hierarchical clustering of genes differentially expressed by castration ( $P < 0.05$ ,  $FC > 2.0$ ) is shown suggesting that AR-downregulated genes (castration up) are further downregulated by ERG expression and AR-upregulated genes are further upregulated. (b) Sum expression score (sum of the positive of Z-score of AR-upregulated and negative of Z-score of AR-downregulated genes) shows statistically significant increase of AR-regulated gene expression in ERG-positive prostates (mean  $\pm$  SD).

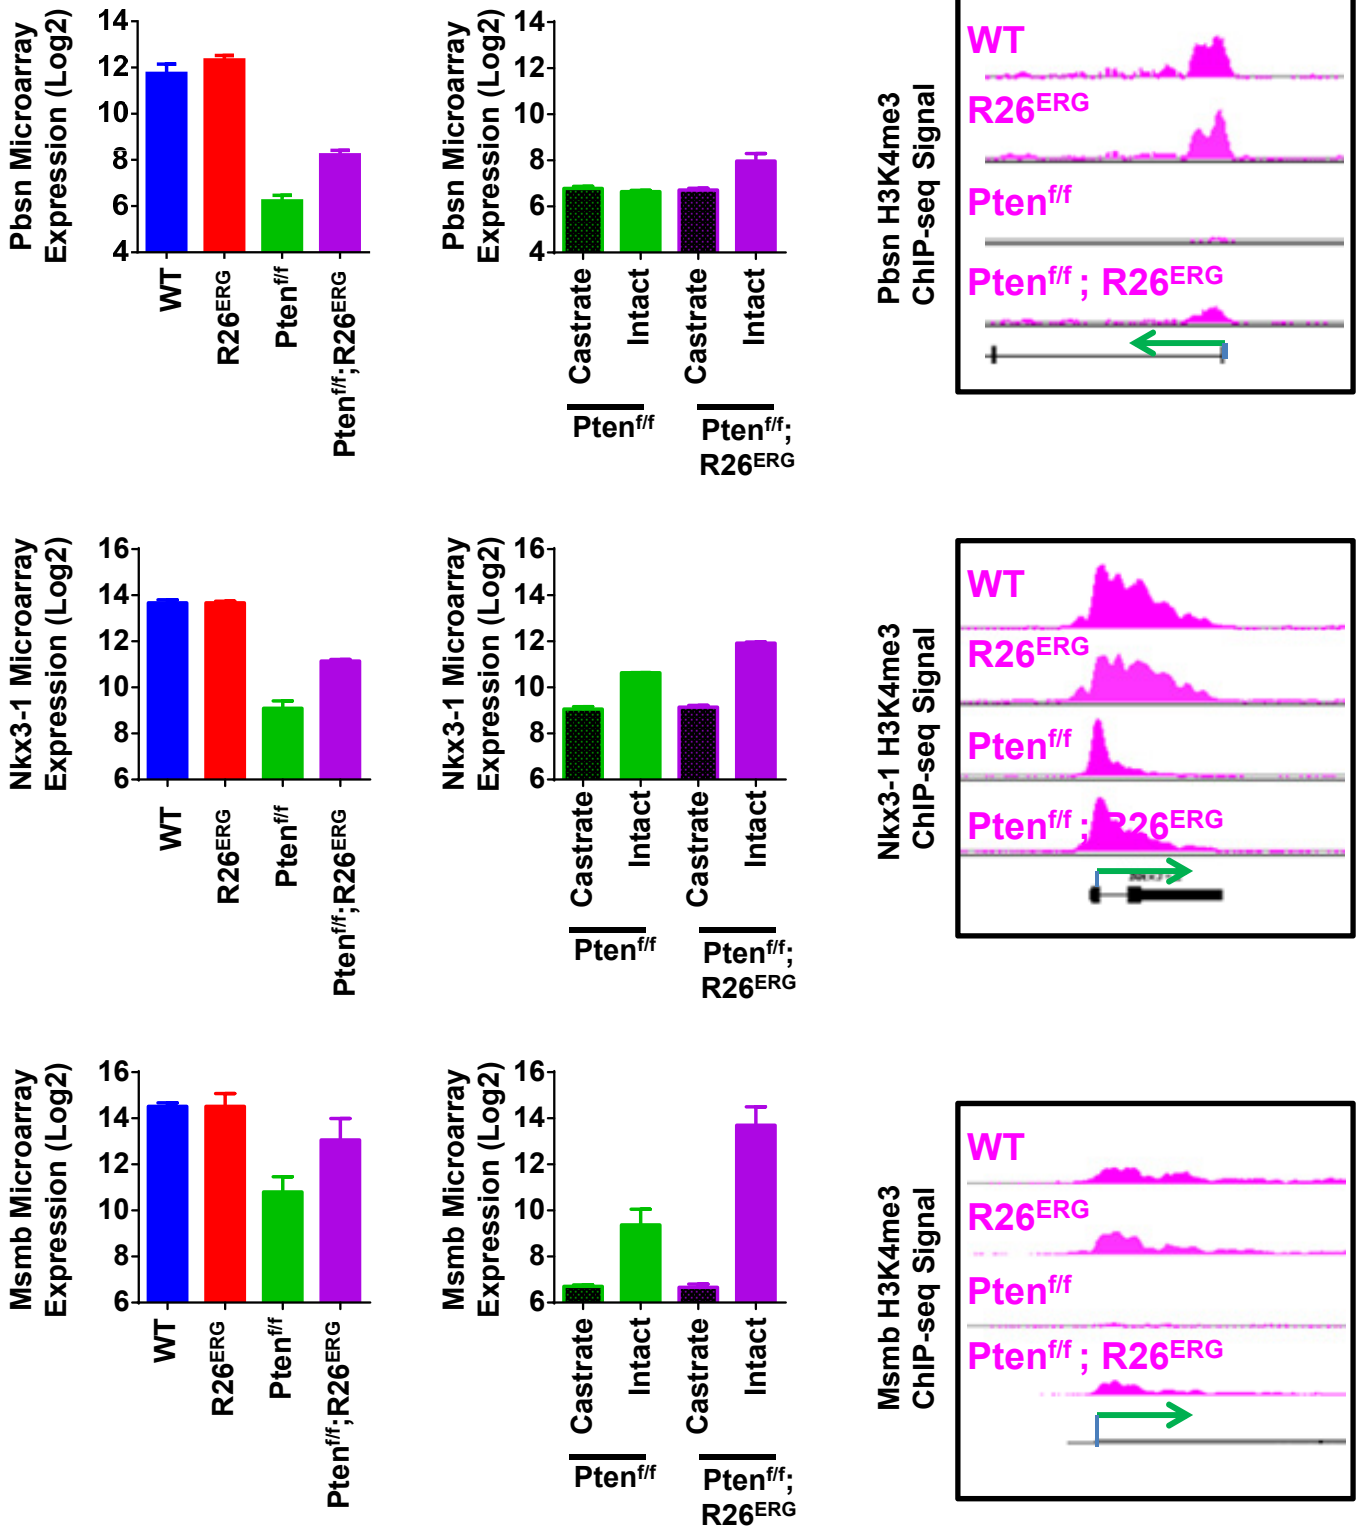

**Supplementary Figure 19. Examples of gene expression of AR regulated genes *Pbsn*, *Nkx3-1*, and *Msmb* and *H3K4me3* ChIP-seq profile.** Plots of microarray gene expression from profiling of 4-month old WT, *R26<sup>ERG</sup>*, *Pten<sup>ff</sup>* and *Pten<sup>ff</sup> R26<sup>ERG</sup>* mice (left column), H3K4me4 profile of an independent set of mice (right column), and gene expression from profiling of 6-month old castrated and intact *Pten<sup>ff</sup>* and *Pten<sup>ff</sup> R26<sup>ERG</sup>* mice (middle column). Plots are mean ± SD.

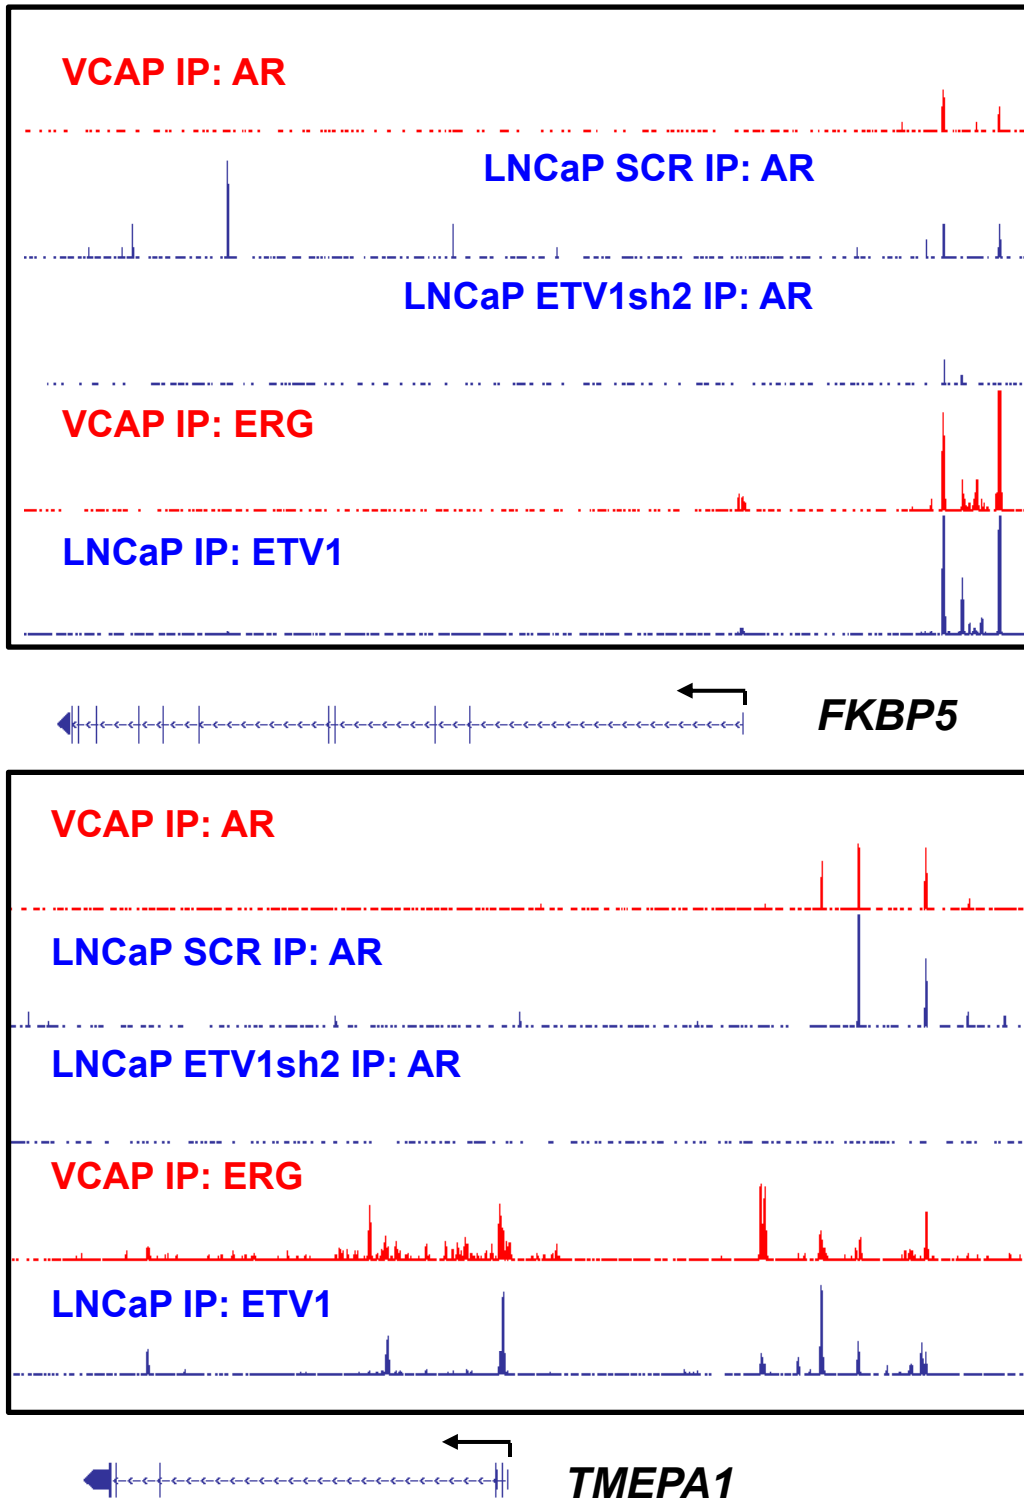

**Supplementary Figure 20. ChIP-seq profiles at *FKBP5* and *TMEPA1* locus.** Shown are ERG and AR ChIP-seq profiles in VCAP cells and ETV1 ChiP-Seq profile of unperturbed LNCaP cells and AR ChIP-seq of LNCaP cells infected with scrambled and *ETV1sh2* shRNA.

## *KLK3* Enhancer

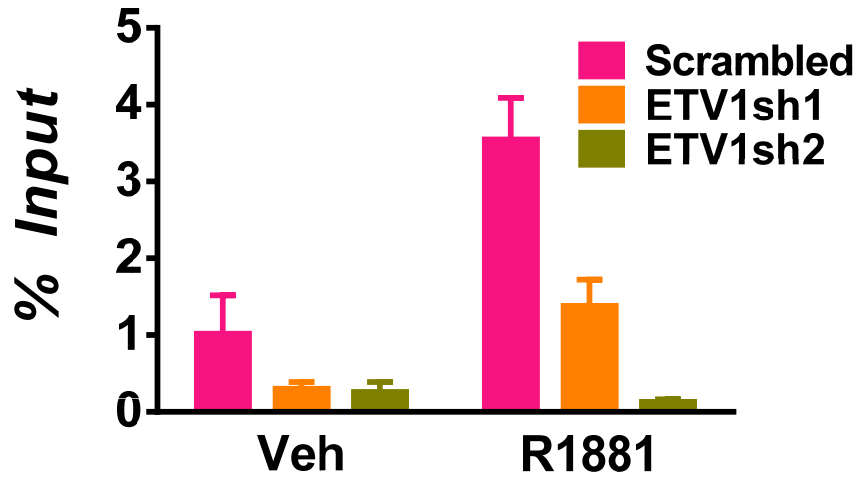

## *TMPRSS2* Enhancer

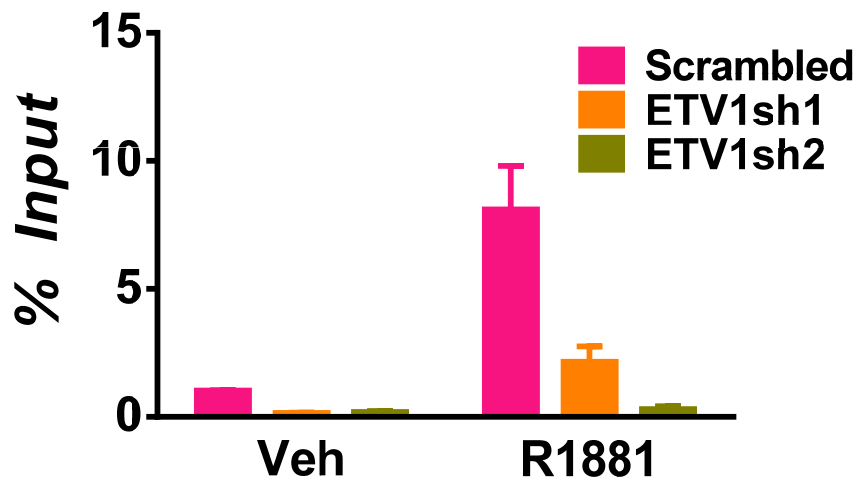

**Supplementary Figure 21. ChIP-qPCR of AR IP in LNCaP cells.** LNCaP cells were infected with scrambled or two different *ETV1* haripins for 72-hours and subsequently treated with vehicle or R1881 for 8 hours prior to chromatin harvest and qPCR.

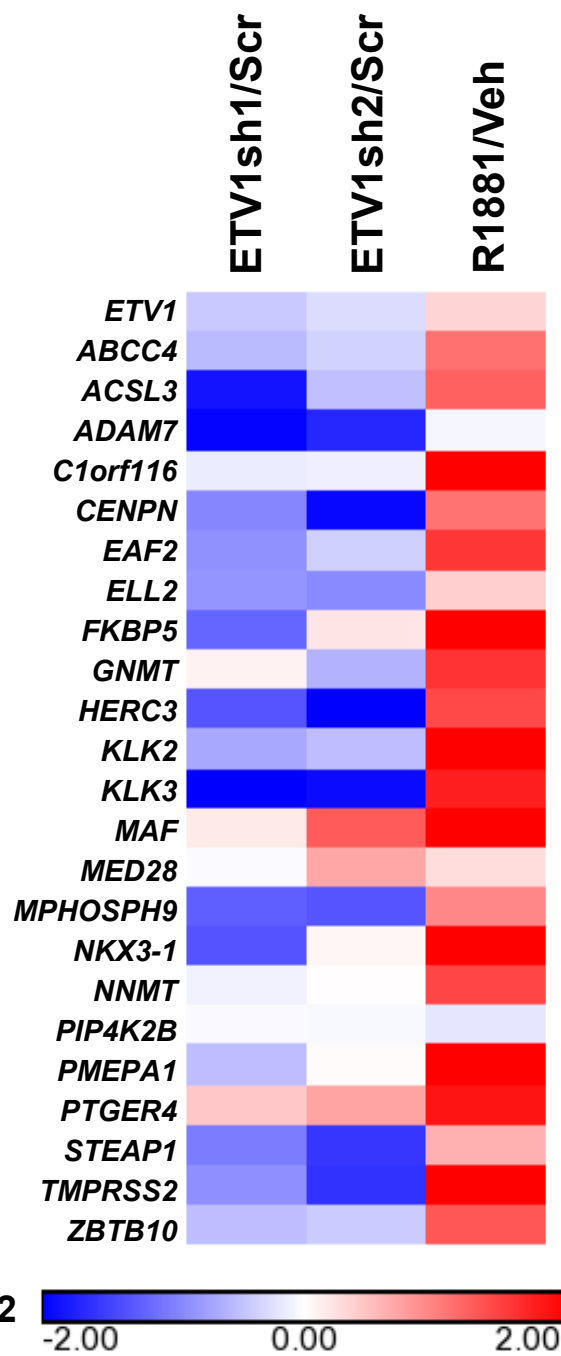

Supplementary Figure 22. Heatmap of change in expression of AR signature genes induced by two *ETV1* hairpins and by R1881 in LNCaP cells.



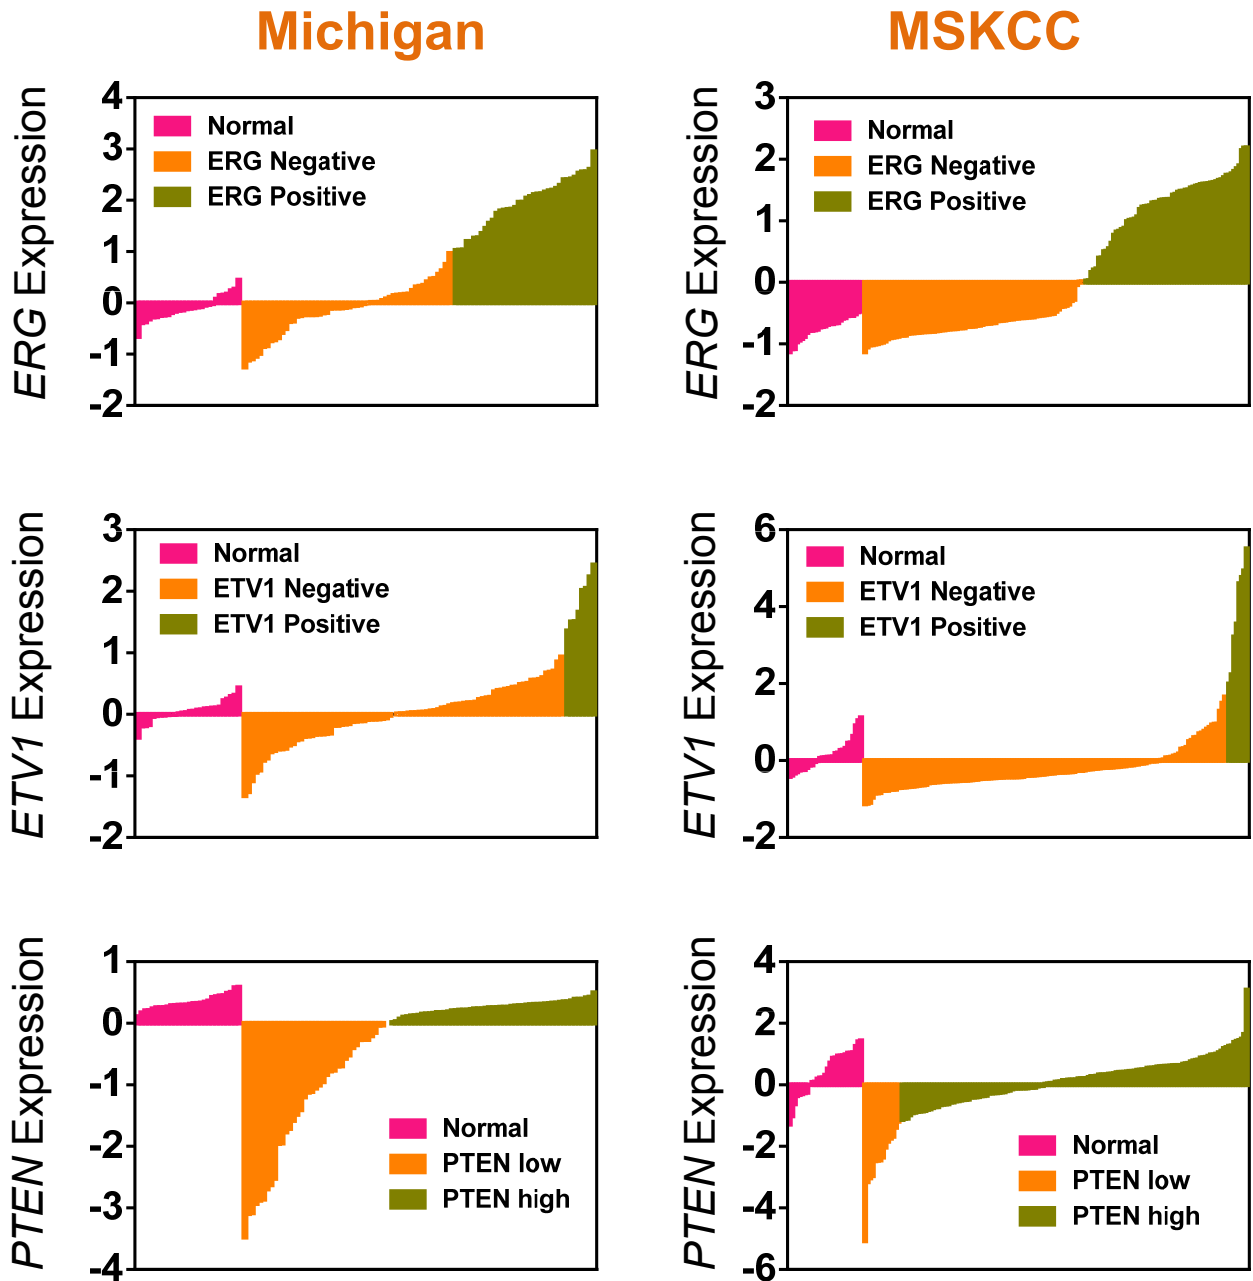

**Supplementary Figure 23. Expression of *ERG*, *ETV1*, and *PTEN* in University of Michigan and MSKCC datasets.** Cutoffs used for analysis is shown. Of note is the increased number of PTEN low samples in the Michigan autopsy dataset enriched for castration-resistant disease compared to the MSKCC prostatectomy dataset.

Supplementary Table 1. ChIP-seq peak overlap table.

|                                            |            | WT    |        |            | R26 <sup>ERG</sup> |        |            | Pten <sup>ff</sup> |        |            | Pten <sup>ff</sup> ;R26 <sup>ERG</sup> |        |            |
|--------------------------------------------|------------|-------|--------|------------|--------------------|--------|------------|--------------------|--------|------------|----------------------------------------|--------|------------|
|                                            |            | AR IP | ERG IP | H3K4me1 IP | AR IP              | ERG IP | H3K4me1 IP | AR IP              | ERG IP | H3K4me1 IP | AR IP                                  | ERG IP | H3K4me1 IP |
| WT                                         | AR IP      | 3,476 | 149    | 2,883      | 3,202              | 2,161  | 3,198      | 1,836              | 105    | 2,764      | 2,850                                  | 1,080  | 3,101      |
|                                            | ERG IP     | 193   | 348    | 16         | 158                | 160    | 40         | 152                | 128    | 16         | 225                                    | 215    | 39         |
|                                            | H3K4me1 IP | 3,261 | 16     | 121,355    | 12,142             | 19,395 | 118,320    | 2,826              | 97     | 99,051     | 7,726                                  | 16,114 | 112,723    |
| R26 <sup>ERG</sup>                         | AR IP      | 3,137 | 87     | 11,111     | 14,889             | 6,090  | 13,248     | 2,779              | 79     | 10,969     | 6,376                                  | 3,123  | 12,604     |
|                                            | ERG IP     | 2,100 | 81     | 17,644     | 6,044              | 24,665 | 23,026     | 1,599              | 828    | 18,848     | 4,146                                  | 15,254 | 22,970     |
|                                            | H3K4me1 IP | 2,921 | 38     | 71,461     | 11,110             | 20,915 | 101,297    | 2,855              | 599    | 73,521     | 6,751                                  | 19,359 | 88,624     |
| Pten <sup>ff</sup>                         | AR IP      | 1,844 | 121    | 2,591      | 2,829              | 1,636  | 3,018      | 3,353              | 112    | 2,646      | 2,885                                  | 920    | 2,977      |
|                                            | ERG IP     | 114   | 109    | 97         | 104                | 882    | 593        | 122                | 1,006  | 167        | 140                                    | 960    | 459        |
|                                            | H3K4me1 IP | 2,845 | 16     | 85,678     | 10,855             | 18,884 | 108,154    | 2,703              | 163    | 123,110    | 7,122                                  | 17,765 | 117,281    |
| Pten <sup>ff</sup> ,<br>R26 <sup>ERG</sup> | AR IP      | 2,793 | 147    | 6,777      | 6,391              | 4,167  | 7,507      | 2,839              | 114    | 6,854      | 8,071                                  | 2,720  | 7,539      |
|                                            | ERG IP     | 1,028 | 125    | 14,813     | 3,079              | 15,169 | 20,296     | 886                | 900    | 17,538     | 2,669                                  | 23,166 | 21,694     |
|                                            | H3K4me1 IP | 2,857 | 37     | 72,627     | 10,817             | 21,414 | 95,015     | 2,831              | 455    | 84,997     | 6,845                                  | 20,876 | 119,429    |

Supplementary Table 2: DREME Motif Analysis

| Background                       | Peaks                       | DREME motif                     | E-value   | Unersated E-value | LOGO | RC LOGO |
|----------------------------------|-----------------------------|---------------------------------|-----------|-------------------|------|---------|
| PtenWT; ERG                      | ERG peaks                   | 1. ETS (ERG)                    | 2.2e-3382 | 2.2e-3382         |      |         |
|                                  |                             | 2. Hox (HoxC, Cdx1/2)           | 2.4e-339  | 4.7e-356          |      |         |
|                                  |                             | 3. Stat3/FEV/ASG1               | 1.20E-293 | 7.9e-2736         |      |         |
|                                  |                             | 4. SP1/Klf4/Klf7                | 1.50E-201 | 2.20E-212         |      |         |
|                                  |                             | 5. FKH (FoxA1)                  | 2.10E-138 | 2.30E-193         |      |         |
|                                  |                             | 6. AR                           | 1.10E-102 | 7.50E-219         |      |         |
|                                  | ALL AR peaks                | 1. AR                           | 1.6e-1387 | 1.6e-1387         |      |         |
|                                  |                             | 2. FKH (FoxA1)                  | 4.1e-324  | 1.1e-352          |      |         |
|                                  |                             | 3. Zscan4/Gm387 secondary       | 9.80E-148 | 8.90E-161         |      |         |
|                                  |                             | 4. Hox (HoxD/HoxB/Cdx2)         | 3.30E-135 | 1.10E-219         |      |         |
| 5. ETS (ERG)                     |                             | 7.20E-121                       | 6.10E-294 |                   |      |         |
| 6. Gata (Gata6/Gata1/Gata5/Evi1) |                             | 2.80E-73                        | 2.30E-114 |                   |      |         |
| 7. N/A                           |                             | 4.20E-68                        | 4.40E-95  |                   |      |         |
| 8. SP1/INSM1                     |                             | 3.80E-56                        | 2.40E-109 |                   |      |         |
| 9. N/A                           |                             | 1.70E-22                        | 4.10E-116 |                   |      |         |
| 10. N/A                          |                             | 1.60E-21                        | 3.90E-41  |                   |      |         |
| Old AR peaks                     | 1. AR                       | 4.60E-302                       | 4.60E-302 |                   |      |         |
|                                  | 2. FKH (FoxA1)              | 7.50E-130                       | 3.40E-138 |                   |      |         |
|                                  | 3. Hox (HoxD/HoxB/Cdx2)     | 3.90E-59                        | 4.10E-92  |                   |      |         |
|                                  | 4. ETS (ERG)                | 3.90E-17                        | 4.40E-89  |                   |      |         |
|                                  | 5. RIM101                   | 5.10E-07                        | 1.80E-14  |                   |      |         |
|                                  | 6. Zfp187                   | 1.80E-06                        | 1.70E-46  |                   |      |         |
|                                  | 7. N/A                      | 5.60E-06                        | 6.30E-11  |                   |      |         |
|                                  | 8. N/A                      | 7.20E-06                        | 6.90E-20  |                   |      |         |
|                                  | 9. FKH2 (FoxA2/Foxd1)       | 2.20E-04                        | 1.40E-06  |                   |      |         |
|                                  | 10. N/A                     | 2.40E-03                        | 1.00E-24  |                   |      |         |
|                                  | 11. SP1/Zfp281/Klf7         | 4.80E-03                        | 3.10E-03  |                   |      |         |
|                                  | 12. N/A                     | 7.10E-03                        | 8.00E-05  |                   |      |         |
|                                  | 13. N/A                     | 2.40E-02                        | 1.40E-02  |                   |      |         |
| New AR peaks                     | 1. AR                       | 2.3e-1077                       | 2.3e-1077 |                   |      |         |
|                                  | 2. FKH (FoxA1)              | 9.10E-213                       | 6.70E-229 |                   |      |         |
|                                  | 3. ETS (ERG)                | 6.30E-120                       | 1.70E-304 |                   |      |         |
|                                  | 4. Zscan4/GM397 secondary   | 2.70E-105                       | 1.10E-118 |                   |      |         |
|                                  | 5. Gata (Gata6/Gata1/Gata5) | 1.80E-83                        | 1.20E-105 |                   |      |         |
|                                  | 6. Hox (HoxB/HoxD/Cdx2)     | 5.90E-67                        | 5.60E-144 |                   |      |         |
|                                  | 7. N/A                      | 5.20E-42                        | 1.10E-77  |                   |      |         |
|                                  | 8. N/A                      | 2.10E-32                        | 1.00E-67  |                   |      |         |
|                                  | 9. N/A                      | 2.20E-22                        | 2.60E-179 |                   |      |         |
|                                  | 10. RIM101                  | 7.70E-16                        | 3.90E-38  |                   |      |         |
|                                  | 11. SRD1                    | 7.70E-13                        | 5.80E-17  |                   |      |         |
|                                  | 12. SP1/Klf4                | 2.80E-10                        | 5.00E-13  |                   |      |         |
|                                  | 13. N/A                     | 2.10E-09                        | 2.70E-13  |                   |      |         |
|                                  | 14. RxRA//NR2F1/ZAP1        | 1.90E-07                        | 7.10E-11  |                   |      |         |
|                                  | 15. Gata (Gata 1/Gata 5)    | 1.60E-05                        | 2.70E-42  |                   |      |         |
| PTEN loss; ERG                   | ERG peaks                   | 1. ETS (ERG)                    | 8.6e-4471 | 8.6e-4471         |      |         |
|                                  |                             | 2. ETS (SPDEF)                  | 4.40E-227 | 3.0e-3520         |      |         |
|                                  |                             | 3. FKH2 (FoxA2/ FoxF2/ Foxl1..) | 2.00E-172 | 9.20E-199         |      |         |
|                                  |                             | 4. SP1/Klf4/Klf7                | 1.20E-163 | 6.50E-171         |      |         |
|                                  |                             | 5. Fos/AP1                      | 6.30E-131 | 1.10E-134         |      |         |
|                                  |                             | 6. Hox (HoxB/HoxD/Cdx1/2)       | 2.20E-102 | 1.30E-134         |      |         |
|                                  | ALL AR peaks                | 1. AR                           | 4.0e-603  | 4.0e-603          |      |         |
|                                  |                             | 2. FKH (FoxA1)                  | 2.5e-315  | 1.1e-342          |      |         |
|                                  |                             | 3. Zscan4/GM397                 | 2.00E-76  | 5.80E-84          |      |         |
|                                  |                             | 4. ETS (ERG)                    | 6.70E-71  | 1.60E-163         |      |         |
|                                  |                             | 5. Hox (HoxD/HoxB/Cdx2)         | 7.00E-60  | 1.10E-120         |      |         |
|                                  |                             | 6. N/A                          | 3.00E-22  | 2.20E-36          |      |         |
|                                  |                             | 7. ACE2                         | 1.90E-19  | 4.10E-55          |      |         |
| 8. Zscan4/GM397                  | 3.40E-16                    | 2.40E-99                        |           |                   |      |         |
| 9. SP1/Klf4/Zfp281               | 1.50E-14                    | 8.40E-17                        |           |                   |      |         |
| 10. FKH2 (FoxA2/FoxA1/FoxF2)     | 2.00E-14                    | 7.50E-24                        |           |                   |      |         |
| 11. AP1/NFE2L2                   | 8.10E-12                    | 3.70E-13                        |           |                   |      |         |
| 12. ETS(ERG/SPI1/FEV)            | 1.50E-10                    | 4.00E-84                        |           |                   |      |         |
| 13. GATA (Gata3/Gata1/Gata6)     | 1.00E-08                    | 2.30E-20                        |           |                   |      |         |

|                                        |                              |           |           |                                    |                                    |
|----------------------------------------|------------------------------|-----------|-----------|------------------------------------|------------------------------------|
|                                        | 14. RIM101                   | 4.10E-07  | 8.20E-23  | CTGGCC                             | GCCAG                              |
|                                        | 15. N/A                      | 8.60E-06  | 2.00E-04  | AATATGCC                           | CCATATT                            |
|                                        | 16. SP1/Klf7/Klf4            | 3.90E-05  | 2.80E-07  | C <sub>2</sub> CGCCC               | GGCG <sub>2</sub> G                |
|                                        | 17. Put3/NHP10               | 1.20E-04  | 4.90E-32  | CCG <sub>2</sub> G                 | C <sub>2</sub> CGG                 |
|                                        | 18. Stat3                    | 2.40E-04  | 8.10E-35  | CTG <sub>2</sub> AA                | TT <sub>2</sub> CAG                |
|                                        | 19. N/A                      | 3.90E-03  | 6.10E-07  | AATACACA                           | TGTGTATT                           |
|                                        | 20. Zbtb12                   | 1.00E-02  | 5.40E-06  | GAGTTC <sub>2</sub>                | GAACTC                             |
|                                        | 21. N/A                      | 1.50E-02  | 1.50E-03  | GAGAT <sub>2</sub> GC              | CCATCTC                            |
|                                        | 22. YY1                      | 2.60E-02  | 1.20E-05  | AAATGAGA                           | TCTCATTT                           |
|                                        | 23. FoxA1                    | 3.70E-02  | 5.10E-20  | AAG <sub>2</sub> AAAC              | GTTT <sub>2</sub> CTT              |
| <b>Old AR peaks</b>                    | 1. AR                        | 2.10E-254 | 2.10E-254 | G <sub>2</sub> ACA                 | TGT <sub>2</sub> C <sub>2</sub>    |
|                                        | 2. FKH (FoxA1)               | 2.70E-141 | 1.50E-148 | AAA <sub>2</sub> A                 | T <sub>2</sub> TTT <sub>2</sub>    |
|                                        | 3. Zscan4/GM397              | 1.60E-24  | 8.70E-29  | GCACA <sub>2</sub>                 | TGTGC <sub>2</sub>                 |
|                                        | 4. Hox (HoxD/HoxB/Cdx2)      | 1.80E-22  | 1.40E-52  | ATAAA                              | TTTTAT                             |
|                                        | 5. ETS (ERG)                 | 1.30E-09  | 1.40E-13  | AGGAA <sub>2</sub>                 | TTCCCT                             |
|                                        | 6. FKH2 (FoxA2/FoxD1)        | 1.10E-08  | 2.80E-88  | GTA <sub>2</sub> A <sub>2</sub>    | T <sub>2</sub> TAC                 |
|                                        | 7. Lin-14                    | 3.60E-08  | 3.50E-11  | CGTTC <sub>2</sub>                 | GAACG                              |
|                                        | 8. FKH2 (FoxA2/FoxD1/Meis1)  | 7.10E-06  | 9.60E-10  | T <sub>2</sub> TTGAC <sub>2</sub>  | GTCAA <sub>2</sub> A               |
|                                        | 9. SP1/Klf7/Klf4             | 5.70E-03  | 3.30E-03  | CCCC <sub>2</sub> CCC              | GGG <sub>2</sub> GGGG              |
|                                        | 10. RIM101                   | 1.30E-02  | 1.00E-07  | CT <sub>2</sub> GGC                | GCC <sub>2</sub> AG                |
|                                        | 11. N/A                      | 3.00E-02  | 2.20E-03  | CAGCCTC <sub>2</sub>               | GAGGCTG                            |
| <b>New AR peaks</b>                    | 1. AR                        | 1.3e-342  | 1.3e-342  | G <sub>2</sub> ACA                 | TGT <sub>2</sub> C <sub>2</sub>    |
|                                        | 2. FKH (FoxA1)               | 3.70E-195 | 6.90E-214 | AAA <sub>2</sub> A                 | T <sub>2</sub> TTT <sub>2</sub>    |
|                                        | 3. ETS (ERG/ELF3/SPI1)       | 3.10E-64  | 9.50E-124 | GGAA                               | TTCC <sub>2</sub>                  |
|                                        | 4. Hox (HoxD/HoxB/Cdx2)      | 3.00E-39  | 8.60E-76  | ATAAA                              | TTTTAT                             |
|                                        | 5. Zscan4/GM397              | 7.40E-34  | 2.10E-40  | GCACA <sub>2</sub>                 | TGTGC <sub>2</sub>                 |
|                                        | 6. INSM1                     | 4.40E-17  | 7.20E-37  | CC <sub>2</sub> G <sub>2</sub> C   | G <sub>2</sub> C <sub>2</sub> GG   |
|                                        | 7. N/A                       | 2.10E-11  | 6.00E-22  | CGT <sub>2</sub> C <sub>2</sub>    | G <sub>2</sub> ACG                 |
|                                        | 8. AP1/NFE2L2/FOS            | 1.60E-09  | 3.90E-10  | TGAGTCA <sub>2</sub>               | TGACTCA                            |
|                                        | 9. RIM101                    | 7.40E-08  | 1.80E-20  | CT <sub>2</sub> GGC                | GCC <sub>2</sub> AG                |
|                                        | 10. GM397                    | 7.50E-08  | 6.30E-68  | ACACA <sub>2</sub>                 | TGTGT                              |
|                                        | 11. Gata (Gata2/Gata3/Gata6) | 1.80E-06  | 1.20E-13  | AGATAA                             | TTATCT                             |
|                                        | 12. Stat3                    | 4.40E-06  | 1.80E-38  | CTGG <sub>2</sub> A                | T <sub>2</sub> CCAG                |
|                                        | 13. ETS (ERG)                | 2.00E-05  | 4.90E-68  | AGGAA <sub>2</sub>                 | TTCCCT                             |
|                                        | 14. SP1/Klf4/Klf7            | 7.20E-04  | 1.60E-06  | CCCC <sub>2</sub> CCC              | GGG <sub>2</sub> GGGG              |
|                                        | 15. ETS (ELK/SPDEF)          | 4.20E-03  | 1.80E-04  | A <sub>2</sub> CCGG                | CCGG <sub>2</sub> T                |
|                                        | 16. Foxo3                    | 5.90E-03  | 2.90E-14  | TTTACA <sub>2</sub>                | TGTAAA                             |
| <b>Pten loss; ERG vs. Pten WT; ERG</b> | <b>Lost AR peaks</b>         | 1. AR     | 2.2e-793  | 2.2e-793                           | TGT <sub>2</sub> C <sub>2</sub>    |
|                                        | 2. Hox (HoxD/HoxB/Cdx2)      | 2.00E-107 | 7.90E-114 | ATAAA                              | TTTTAT                             |
|                                        | 3. Zscan4/Gm397              | 2.20E-86  | 1.30E-92  | GCACA <sub>2</sub>                 | TGTGC <sub>2</sub>                 |
|                                        | 4. Gata (Gata6/Gata1)        | 1.10E-71  | 1.90E-97  | GATAA                              | TTATC <sub>2</sub>                 |
|                                        | 5. ETS (ERG/SPI1)            | 5.70E-61  | 8.30E-160 | AGGAA <sub>2</sub>                 | TTCCCT                             |
|                                        | 6. FKH2 (FoxA2/Foxo3)        | 1.80E-52  | 4.80E-92  | GTA <sub>2</sub> A <sub>2</sub> A  | T <sub>2</sub> T <sub>2</sub> TAC  |
|                                        | 7. N/A                       | 2.30E-42  | 1.00E-67  | GTTTC <sub>2</sub>                 | GAAC <sub>2</sub>                  |
|                                        | 8. N/A                       | 1.30E-23  | 6.80E-40  | G <sub>2</sub> CAG <sub>2</sub>    | CTG <sub>2</sub> C                 |
|                                        | 9. FKH (FoxA1/FoxO3)         | 1.90E-18  | 4.40E-104 | G <sub>2</sub> A <sub>2</sub> ACA  | TGT <sub>2</sub> T <sub>2</sub> C  |
|                                        | 10. Zfp187                   | 1.30E-12  | 1.00E-149 | GTAC <sub>2</sub>                  | GTAC                               |
|                                        | 11. FKH1 (FoxK1/Foxj1/FoxA2) | 7.60E-11  | 2.40E-25  | AAACAAA                            | TTT <sub>2</sub> TTT               |
|                                        | 12. RXRA/NR2F1               | 4.90E-10  | 1.40E-12  | AAA <sub>2</sub> G <sub>2</sub> CA | TG <sub>2</sub> C <sub>2</sub> TTT |
|                                        | 13. RIM101                   | 2.70E-09  | 1.20E-28  | CT <sub>2</sub> GGC                | GCC <sub>2</sub> AG                |
|                                        | 14. SPI1/GCR2/SP1            | 2.10E-08  | 4.60E-18  | C <sub>2</sub> TCCC                | GGGA <sub>2</sub> G                |
|                                        | 15. ARID3A                   | 7.20E-05  | 3.40E-07  | ATTAAA                             | TTTAAT <sub>2</sub>                |
|                                        | 16. N/A                      | 2.20E-04  | 8.10E-33  | CA <sub>2</sub> ATA                | TAT <sub>2</sub> TG                |
|                                        | 17. Rhox11                   | 1.60E-03  | 2.00E-10  | CTGTAA <sub>2</sub>                | TTACAG                             |
|                                        | 18. CBF1/Myc/HIF1A           | 3.00E-03  | 3.50E-37  | CGT <sub>2</sub> C                 | G <sub>2</sub> ACG                 |
|                                        | 19. Klf4/Klf7/SP1            | 2.30E-02  | 2.40E-03  | CC <sub>2</sub> C <sub>2</sub> CC  | GGC <sub>2</sub> GG                |
|                                        | 20. TEAD1/TEC1               | 4.10E-02  | 1.40E-04  | CATTCC <sub>2</sub> G              | C <sub>2</sub> GGAATG              |

**Supplementary Table 3: ERG-reguated genes in *Pten* wild-type prostates**

| Probe ID | Symbol        | p-Value  | FDR  | Mean(ERG Neg) | Mean(ERG Pos) | Diff  | Fold Change |
|----------|---------------|----------|------|---------------|---------------|-------|-------------|
| 460682   | 2200001I15Rik | 3.89E-04 | 0.29 | 7.94          | 10.30         | -2.36 | -5.15       |
| 580022   | Sgsh          | 1.09E-04 | 0.18 | 7.77          | 9.10          | -1.33 | -2.52       |
| 1010497  | Tomm22        | 1.17E-04 | 0.18 | 9.90          | 10.79         | -0.89 | -1.85       |
| 5360358  | 1110017F19Rik | 1.82E-04 | 0.21 | 6.73          | 7.40          | -0.66 | -1.58       |
| 6660747  | Slc27a3       | 2.84E-04 | 0.26 | 8.51          | 7.87          | 0.64  | 1.56        |
| 1070091  | Gmfg          | 1.02E-04 | 0.18 | 10.11         | 9.43          | 0.67  | 1.59        |
| 3780338  | Cdc42ep2      | 3.71E-04 | 0.29 | 9.35          | 8.68          | 0.68  | 1.60        |
| 6760661  | Sipa11        | 8.28E-05 | 0.18 | 11.44         | 10.73         | 0.71  | 1.64        |
| 1510270  | Tsga14        | 1.79E-04 | 0.21 | 9.14          | 8.43          | 0.71  | 1.64        |
| 6100392  | Tmem53        | 3.54E-04 | 0.29 | 9.67          | 8.93          | 0.74  | 1.67        |
| 3310537  | P4ha2         | 3.80E-04 | 0.29 | 10.76         | 10.01         | 0.75  | 1.68        |
| 5960754  | P4ha2         | 1.80E-04 | 0.21 | 9.91          | 9.14          | 0.77  | 1.71        |
| 1260400  | Stxbp1        | 1.27E-04 | 0.18 | 11.27         | 10.41         | 0.86  | 1.82        |
| 5550470  | Aldoc         | 1.13E-04 | 0.18 | 9.90          | 8.96          | 0.94  | 1.92        |
| 4490253  | Klb           | 5.31E-05 | 0.18 | 7.41          | 6.46          | 0.95  | 1.94        |
| 5560692  | Paip1         | 2.07E-04 | 0.22 | 8.73          | 7.74          | 0.99  | 1.99        |
| 5290561  | Prr13         | 2.04E-04 | 0.22 | 13.51         | 12.51         | 1.00  | 2.00        |
| 4610433  | Srgn          | 1.66E-04 | 0.21 | 8.86          | 7.42          | 1.43  | 2.70        |
| 6980452  | Srms          | 4.09E-05 | 0.16 | 8.31          | 6.36          | 1.94  | 3.84        |
| 3800148  | Nyx           | 5.60E-05 | 0.18 | 9.28          | 7.01          | 2.27  | 4.83        |
| 3190408  | Mest          | 2.73E-05 | 0.16 | 9.05          | 6.60          | 2.45  | 5.46        |
| 1690019  | Mest          | 9.11E-05 | 0.18 | 10.01         | 6.99          | 3.03  | 8.15        |
| 6770356  | Mest          | 6.20E-05 | 0.18 | 10.79         | 7.17          | 3.62  | 12.26       |
| 5310220  | eGFP          | 4.63E-07 | 0.02 | 10.42         | 6.55          | 3.86  | 14.57       |

**Supplementary Table 4: ERG-regulated genes in *Pten* loss prostates**

| Probe ID | Symbol           | p-Value  | FDR  | mean(ERG Ne) | mean(ERG Pc) | Diff | Fold Change |
|----------|------------------|----------|------|--------------|--------------|------|-------------|
| 4260241  | Dlk1             | 4.36E-04 | 0.07 | 7.02         | 11.87        | 4.86 | 28.96       |
| 5310220  | eGFP             | 6.52E-09 | 0.00 | 6.40         | 10.65        | 4.25 | 19.08       |
| 2850020  | Dlk1             | 7.67E-04 | 0.09 | 6.08         | 10.18        | 4.10 | 17.13       |
| 6900278  | Otos             | 2.40E-04 | 0.06 | 6.18         | 10.17        | 3.99 | 15.88       |
| 1300600  | Lman1l           | 6.42E-06 | 0.02 | 7.88         | 11.69        | 3.81 | 14.05       |
| 3890220  | Lman1l           | 1.24E-05 | 0.02 | 6.86         | 10.40        | 3.54 | 11.64       |
| 3180671  | Fbp1             | 8.07E-05 | 0.04 | 6.79         | 9.90         | 3.11 | 8.62        |
| 990484   | Lman1l           | 2.88E-05 | 0.03 | 6.57         | 9.42         | 2.86 | 7.24        |
| 7200672  | LOC635815        | 3.02E-03 | 0.15 | 7.90         | 10.66        | 2.76 | 6.78        |
| 360021   | Otop1            | 6.39E-05 | 0.04 | 6.40         | 9.08         | 2.68 | 6.42        |
| 240093   | Otop1            | 7.36E-05 | 0.04 | 7.26         | 9.85         | 2.59 | 6.02        |
| 1510373  | Aqp5             | 9.99E-06 | 0.02 | 8.49         | 10.83        | 2.34 | 5.05        |
| 5050474  | Muc2             | 6.74E-03 | 0.20 | 6.83         | 9.14         | 2.31 | 4.95        |
| 60288    | Atp2a3           | 1.35E-04 | 0.05 | 10.24        | 12.52        | 2.28 | 4.85        |
| 7040253  | Msemb            | 7.41E-03 | 0.21 | 10.80        | 13.06        | 2.25 | 4.77        |
| 520403   | Cxcl15           | 2.45E-04 | 0.06 | 12.21        | 14.42        | 2.21 | 4.62        |
| 7560747  | Aldh1l2          | 3.06E-05 | 0.03 | 7.44         | 9.63         | 2.19 | 4.58        |
| 5570168  | 1245_ig_kappa_va | 1.20E-02 | 0.24 | 7.88         | 10.05        | 2.17 | 4.49        |
| 610255   | LOC100046616     | 1.58E-04 | 0.05 | 7.58         | 9.70         | 2.12 | 4.35        |
| 450193   | Fbp3             | 3.66E-04 | 0.07 | 6.24         | 8.30         | 2.06 | 4.18        |
| 5550470  | Aldoc            | 5.90E-05 | 0.04 | 9.76         | 11.81        | 2.05 | 4.14        |
| 2810731  | Nkx3-1           | 1.30E-05 | 0.02 | 9.10         | 11.15        | 2.05 | 4.14        |
| 2570672  | Atp2a3           | 6.88E-05 | 0.04 | 11.04        | 13.08        | 2.04 | 4.10        |
| 150162   | Reg3b            | 4.79E-03 | 0.18 | 11.18        | 13.21        | 2.03 | 4.09        |
| 4670671  | Pbsn             | 1.32E-05 | 0.02 | 6.23         | 8.22         | 1.99 | 3.97        |
| 1740008  | Ptx3             | 8.24E-03 | 0.22 | 6.13         | 8.08         | 1.95 | 3.88        |
| 780554   | Sema7a           | 6.28E-04 | 0.09 | 7.09         | 9.00         | 1.90 | 3.74        |
| 3390341  | Tmem87a          | 1.80E-02 | 0.29 | 7.71         | 9.60         | 1.89 | 3.70        |
| 3610082  | Cxcl1            | 1.46E-02 | 0.26 | 10.43        | 12.30        | 1.88 | 3.67        |
| 150114   | Chi3l1           | 1.39E-03 | 0.12 | 7.55         | 9.42         | 1.87 | 3.67        |
| 3800246  | Igh-V11          | 8.23E-03 | 0.22 | 6.35         | 8.22         | 1.87 | 3.66        |
| 6650424  | LOC100046690     | 8.43E-04 | 0.10 | 7.02         | 8.88         | 1.86 | 3.63        |
| 5390136  | Ptx3             | 8.98E-03 | 0.22 | 6.20         | 8.05         | 1.85 | 3.61        |
| 1170139  | Spp1             | 7.03E-03 | 0.20 | 10.23        | 12.08        | 1.85 | 3.60        |
| 6520450  | Bace2            | 8.38E-06 | 0.02 | 8.53         | 10.30        | 1.77 | 3.41        |
| 4780341  | Alms1            | 1.31E-03 | 0.11 | 6.25         | 7.99         | 1.74 | 3.34        |
| 510020   | Pde2a            | 7.41E-05 | 0.04 | 7.48         | 9.22         | 1.73 | 3.32        |
| 6250494  | Cp               | 5.38E-03 | 0.18 | 11.20        | 12.90        | 1.70 | 3.26        |
| 650524   | Gdf15            | 8.23E-05 | 0.04 | 7.03         | 8.70         | 1.67 | 3.18        |
| 1340746  | Faim2            | 1.04E-05 | 0.02 | 6.58         | 8.25         | 1.67 | 3.17        |
| 6900424  | Reg3b            | 5.42E-03 | 0.18 | 7.17         | 8.83         | 1.66 | 3.17        |
| 450327   | LOC635601        | 4.93E-03 | 0.18 | 7.52         | 9.17         | 1.65 | 3.14        |
| 4390136  | Slc12a8          | 7.39E-03 | 0.21 | 8.23         | 9.87         | 1.64 | 3.12        |
| 2000465  | 961_ig_heavy_var | 1.03E-02 | 0.23 | 7.40         | 9.04         | 1.64 | 3.11        |

|         |                  |          |      |       |       |      |      |
|---------|------------------|----------|------|-------|-------|------|------|
| 650669  | Serpinb11        | 1.08E-03 | 0.10 | 10.98 | 12.60 | 1.62 | 3.07 |
| 270086  | Slc5a5           | 1.75E-03 | 0.12 | 8.29  | 9.90  | 1.61 | 3.06 |
| 4850754 | Calml4           | 7.47E-03 | 0.21 | 7.56  | 9.17  | 1.61 | 3.05 |
| 3390221 | Bace2            | 3.61E-07 | 0.00 | 11.75 | 13.36 | 1.60 | 3.04 |
| 540121  | Cp               | 2.16E-03 | 0.13 | 7.25  | 8.85  | 1.60 | 3.03 |
| 270324  | Tnc              | 6.32E-03 | 0.20 | 8.95  | 10.53 | 1.58 | 2.99 |
| 3290519 | Kank4            | 3.97E-05 | 0.03 | 7.20  | 8.77  | 1.57 | 2.98 |
| 5050059 | Glycam1          | 6.71E-03 | 0.20 | 6.86  | 8.40  | 1.55 | 2.92 |
| 5700669 | D11Bwg0517e      | 6.19E-03 | 0.19 | 7.71  | 9.24  | 1.54 | 2.90 |
| 5550711 | Tesc             | 1.60E-02 | 0.27 | 8.26  | 9.79  | 1.53 | 2.89 |
| 2600041 | Muc3             | 1.08E-02 | 0.24 | 5.93  | 7.46  | 1.53 | 2.88 |
| 7200392 | Saa4             | 1.19E-02 | 0.24 | 6.41  | 7.92  | 1.51 | 2.84 |
| 290685  | Creld2           | 3.26E-05 | 0.03 | 10.32 | 11.83 | 1.50 | 2.83 |
| 7000289 | Adora2b          | 2.83E-03 | 0.15 | 8.93  | 10.43 | 1.50 | 2.82 |
| 5420333 | Tnc              | 4.15E-03 | 0.17 | 8.59  | 10.08 | 1.50 | 2.82 |
| 5810575 | LOC635601        | 1.32E-02 | 0.25 | 7.68  | 9.16  | 1.48 | 2.79 |
| 870195  | Pde4b            | 2.69E-04 | 0.06 | 8.19  | 9.67  | 1.48 | 2.79 |
| 1170079 | 1229_ig_kappa_va | 5.35E-03 | 0.18 | 7.32  | 8.79  | 1.47 | 2.78 |
| 1470176 | Wars             | 6.79E-04 | 0.09 | 8.90  | 10.36 | 1.46 | 2.76 |
| 2260059 | Bmp7             | 2.03E-03 | 0.13 | 7.24  | 8.70  | 1.46 | 2.75 |
| 1570594 | Socs3            | 1.23E-02 | 0.25 | 9.36  | 10.80 | 1.44 | 2.71 |
| 5560338 | Abo              | 2.12E-03 | 0.13 | 10.47 | 11.90 | 1.43 | 2.69 |
| 1980603 | S100a9           | 1.24E-02 | 0.25 | 9.61  | 11.04 | 1.43 | 2.69 |
| 5130553 | Tpsab1           | 2.74E-03 | 0.14 | 6.80  | 8.22  | 1.42 | 2.68 |
| 3800187 | Gsdma1           | 1.23E-03 | 0.11 | 7.64  | 9.04  | 1.41 | 2.65 |
| 3420754 | Il1b             | 1.13E-02 | 0.24 | 8.63  | 10.04 | 1.40 | 2.64 |
| 1260255 | Ank1             | 1.94E-03 | 0.13 | 7.20  | 8.60  | 1.40 | 2.63 |
| 6940750 | Gtl2             | 9.33E-03 | 0.22 | 8.21  | 9.60  | 1.39 | 2.62 |
| 830619  | Reg3g            | 4.60E-03 | 0.17 | 12.18 | 13.55 | 1.37 | 2.59 |
| 1340601 | Qsox1            | 4.89E-04 | 0.08 | 10.11 | 11.49 | 1.37 | 2.59 |
| 1170167 | Kank4            | 7.05E-05 | 0.04 | 6.69  | 8.05  | 1.36 | 2.57 |
| 4290465 | Selp             | 6.59E-03 | 0.20 | 8.09  | 9.43  | 1.34 | 2.53 |
| 1740338 | Tinagl           | 2.23E-04 | 0.06 | 7.94  | 9.28  | 1.33 | 2.52 |
| 2350397 | Wars             | 6.67E-05 | 0.04 | 10.97 | 12.30 | 1.33 | 2.51 |
| 1990021 | SMUSG000000687   | 1.49E-02 | 0.27 | 7.64  | 8.97  | 1.32 | 2.50 |
| 1580730 | Ampd3            | 7.73E-04 | 0.09 | 9.58  | 10.89 | 1.31 | 2.49 |
| 7000224 | Cd177            | 5.99E-03 | 0.19 | 6.27  | 7.57  | 1.30 | 2.46 |
| 650167  | Wars             | 2.20E-04 | 0.06 | 8.07  | 9.36  | 1.29 | 2.44 |
| 670554  | Chrnbl           | 1.51E-04 | 0.05 | 9.55  | 10.83 | 1.28 | 2.43 |
| 520070  | Saa1             | 7.73E-03 | 0.21 | 7.44  | 8.72  | 1.28 | 2.42 |
| 4730039 | Rap1gap          | 6.22E-04 | 0.09 | 9.84  | 11.10 | 1.26 | 2.40 |
| 3400026 | Asph             | 3.33E-03 | 0.16 | 7.44  | 8.70  | 1.26 | 2.39 |
| 1190546 | S100a8           | 1.33E-02 | 0.25 | 10.64 | 11.90 | 1.26 | 2.39 |
| 7400717 | Hpcal4           | 6.15E-04 | 0.09 | 6.77  | 8.02  | 1.26 | 2.39 |
| 1660327 | Tinagl1          | 4.22E-04 | 0.07 | 7.75  | 9.00  | 1.26 | 2.39 |
| 7160711 | Retnlg           | 1.70E-02 | 0.28 | 6.84  | 8.08  | 1.24 | 2.36 |
| 3780717 | Spcs3            | 1.79E-03 | 0.12 | 10.52 | 11.75 | 1.24 | 2.35 |

|         |               |          |      |       |       |      |      |
|---------|---------------|----------|------|-------|-------|------|------|
| 7610114 | Mgst1         | 2.64E-04 | 0.06 | 11.73 | 12.94 | 1.21 | 2.31 |
| 2760139 | Lonrf3        | 1.06E-03 | 0.10 | 8.73  | 9.93  | 1.20 | 2.29 |
| 6200112 | Cp            | 1.02E-04 | 0.04 | 9.25  | 10.45 | 1.20 | 2.29 |
| 4610095 | Dnajc3        | 2.35E-05 | 0.03 | 10.35 | 11.55 | 1.19 | 2.28 |
| 7380670 | Asph          | 7.37E-04 | 0.09 | 8.88  | 10.06 | 1.18 | 2.26 |
| 670360  | Tubb6         | 3.09E-03 | 0.15 | 10.06 | 11.24 | 1.17 | 2.26 |
| 3450220 | Car9          | 1.19E-02 | 0.24 | 7.46  | 8.63  | 1.17 | 2.25 |
| 1030142 | Pygl          | 2.00E-02 | 0.30 | 9.15  | 10.32 | 1.16 | 2.24 |
| 1300095 | Il8rb         | 8.19E-03 | 0.22 | 7.10  | 8.26  | 1.16 | 2.23 |
| 6770356 | Mest          | 4.27E-03 | 0.17 | 6.35  | 7.51  | 1.16 | 2.23 |
| 2030497 | Unc5b         | 3.22E-06 | 0.02 | 7.60  | 8.76  | 1.16 | 2.23 |
| 3420398 | Il8ra         | 1.29E-04 | 0.05 | 6.21  | 7.37  | 1.15 | 2.22 |
| 3520592 | Cp            | 9.39E-03 | 0.23 | 6.88  | 8.03  | 1.15 | 2.22 |
| 3450735 | Wars          | 1.49E-04 | 0.05 | 8.00  | 9.15  | 1.15 | 2.22 |
| 7650048 | Fpr2          | 9.76E-03 | 0.23 | 8.44  | 9.58  | 1.15 | 2.22 |
| 6840040 | Csf3r         | 1.35E-03 | 0.11 | 8.00  | 9.14  | 1.14 | 2.21 |
| 4900722 | H2-T10        | 3.93E-03 | 0.16 | 8.01  | 9.16  | 1.14 | 2.21 |
| 6110681 | 2210010N04Rik | 4.59E-06 | 0.02 | 7.60  | 8.73  | 1.13 | 2.19 |
| 10170   | Clec4d        | 8.88E-03 | 0.22 | 8.59  | 9.71  | 1.12 | 2.18 |
| 4180437 | LOC100047619  | 2.75E-03 | 0.14 | 10.18 | 11.29 | 1.12 | 2.17 |
| 1570358 | 9930021D14Rik | 1.87E-04 | 0.05 | 6.96  | 8.07  | 1.11 | 2.16 |
| 3400270 | Tmem97        | 3.75E-05 | 0.03 | 9.07  | 10.17 | 1.10 | 2.15 |
| 5310133 | Tcn2          | 2.42E-04 | 0.06 | 10.14 | 11.25 | 1.10 | 2.15 |
| 5570079 | Hgf           | 8.57E-03 | 0.22 | 7.20  | 8.30  | 1.10 | 2.14 |
| 4640328 | 2610307O08Rik | 2.01E-03 | 0.13 | 10.07 | 11.17 | 1.10 | 2.14 |
| 1170451 | EG226654      | 2.78E-03 | 0.14 | 8.05  | 9.15  | 1.10 | 2.14 |
| 3060754 | Apbb2         | 1.25E-04 | 0.05 | 8.47  | 9.57  | 1.09 | 2.13 |
| 2120091 | Fut2          | 2.21E-03 | 0.13 | 9.91  | 11.00 | 1.09 | 2.12 |
| 3190639 | Kif5c         | 4.30E-03 | 0.17 | 7.20  | 8.28  | 1.08 | 2.12 |
| 5340750 | Gpr110        | 1.86E-05 | 0.02 | 6.18  | 7.26  | 1.08 | 2.12 |
| 1070274 | St3gal4       | 3.53E-03 | 0.16 | 7.23  | 8.31  | 1.08 | 2.12 |
| 6900315 | Fbln1         | 2.52E-03 | 0.14 | 7.56  | 8.64  | 1.08 | 2.11 |
| 6980452 | Srms          | 1.84E-02 | 0.29 | 6.37  | 7.45  | 1.07 | 2.11 |
| 520673  | D030018L15Rik | 1.66E-02 | 0.28 | 7.53  | 8.60  | 1.07 | 2.10 |
| 7610450 | Itpr2         | 1.91E-04 | 0.05 | 9.31  | 10.38 | 1.07 | 2.09 |
| 7400719 | Derl3         | 7.72E-04 | 0.09 | 6.59  | 7.65  | 1.06 | 2.09 |
| 290242  | Bin1          | 2.29E-03 | 0.13 | 9.82  | 10.88 | 1.06 | 2.08 |
| 4070253 | Chrnbl        | 1.58E-03 | 0.12 | 8.02  | 9.07  | 1.05 | 2.06 |
| 7040100 | Slco2a1       | 1.77E-02 | 0.28 | 8.49  | 9.54  | 1.05 | 2.06 |
| 6330300 | 2310040A07Rik | 1.90E-03 | 0.13 | 6.87  | 7.92  | 1.05 | 2.06 |
| 7570292 | Spon2         | 1.01E-02 | 0.23 | 10.31 | 11.35 | 1.04 | 2.06 |
| 2680605 | Chl1          | 1.96E-03 | 0.13 | 6.32  | 7.36  | 1.04 | 2.06 |
| 5900259 | Csf3r         | 1.62E-03 | 0.12 | 7.28  | 8.32  | 1.04 | 2.05 |
| 5290068 | Kank4         | 1.96E-08 | 0.00 | 6.39  | 7.42  | 1.03 | 2.04 |
| 2120634 | Serpine2      | 6.40E-05 | 0.04 | 7.55  | 8.57  | 1.02 | 2.03 |
| 3400703 | Macrod1       | 7.18E-05 | 0.04 | 8.54  | 9.56  | 1.02 | 2.03 |
| 160187  | Padi4         | 8.54E-03 | 0.22 | 7.14  | 8.16  | 1.02 | 2.03 |



|         |                  |          |      |       |       |      |      |
|---------|------------------|----------|------|-------|-------|------|------|
| 6290441 | LOC280487        | 3.35E-03 | 0.16 | 8.38  | 9.39  | 1.02 | 2.02 |
| 1440300 | Palmd            | 2.04E-03 | 0.13 | 8.96  | 9.97  | 1.01 | 2.02 |
| 1190364 | Dbc1             | 1.71E-04 | 0.05 | 6.52  | 7.53  | 1.01 | 2.02 |
| 5090376 | Thsd1            | 1.71E-03 | 0.12 | 6.74  | 7.76  | 1.01 | 2.02 |
| 5360575 | EG666668         | 2.51E-04 | 0.06 | 6.89  | 7.90  | 1.01 | 2.01 |
| 5080279 | Palmd            | 1.88E-03 | 0.12 | 8.76  | 9.76  | 1.01 | 2.01 |
| 3850148 | EG432867         | 1.12E-04 | 0.05 | 6.32  | 7.32  | 1.00 | 2.00 |
| 5090619 | Csgalnact1       | 1.74E-03 | 0.12 | 7.05  | 8.05  | 1.00 | 2.00 |
| 5390553 | LOC640696        | 1.86E-02 | 0.29 | 6.98  | 7.97  | 1.00 | 1.99 |
| 1110088 | Apobec1          | 1.59E-04 | 0.05 | 9.50  | 10.49 | 0.99 | 1.99 |
| 4230136 | Rasl11a          | 3.42E-04 | 0.07 | 6.96  | 7.95  | 0.99 | 1.99 |
| 6370594 | Atp2a3           | 9.31E-04 | 0.10 | 6.49  | 7.47  | 0.98 | 1.97 |
| 5310692 | Slc5a5           | 1.49E-03 | 0.12 | 6.40  | 7.38  | 0.98 | 1.97 |
| 1940762 | 2310040A07Rik    | 8.18E-03 | 0.22 | 7.18  | 8.15  | 0.97 | 1.96 |
| 3800300 | LOC100041569     | 6.12E-03 | 0.19 | 7.40  | 8.37  | 0.97 | 1.95 |
| 5310376 | Mthfd2           | 3.59E-05 | 0.03 | 7.80  | 8.76  | 0.97 | 1.95 |
| 2360070 | Tmc5             | 4.19E-04 | 0.07 | 7.34  | 8.31  | 0.96 | 1.95 |
| 2100689 | Unc93b1          | 1.27E-03 | 0.11 | 9.18  | 10.14 | 0.96 | 1.95 |
| 3890528 | Rgs16            | 1.79E-02 | 0.28 | 7.06  | 8.02  | 0.96 | 1.94 |
| 2190280 | C330008K14Rik    | 4.20E-04 | 0.07 | 7.78  | 8.74  | 0.95 | 1.94 |
| 870743  | Bace2            | 2.07E-04 | 0.05 | 7.76  | 8.72  | 0.95 | 1.93 |
| 6380156 | Rhoj             | 2.64E-03 | 0.14 | 9.53  | 10.48 | 0.95 | 1.93 |
| 2690221 | Rai3             | 4.42E-04 | 0.07 | 9.71  | 10.66 | 0.95 | 1.93 |
| 1430110 | Ptpn1            | 1.59E-03 | 0.12 | 9.27  | 10.22 | 0.95 | 1.93 |
| 2970376 | Dio3             | 1.08E-02 | 0.24 | 7.07  | 8.01  | 0.95 | 1.93 |
| 4900475 | LOC100046025     | 2.04E-02 | 0.30 | 8.23  | 9.18  | 0.95 | 1.93 |
| 7000097 | LOC100044257     | 6.43E-03 | 0.20 | 6.72  | 7.66  | 0.94 | 1.92 |
| 3370433 | Hgf              | 5.86E-03 | 0.19 | 6.84  | 7.78  | 0.94 | 1.92 |
| 1400398 | 2310014H01Rik    | 4.79E-03 | 0.18 | 10.48 | 11.42 | 0.94 | 1.92 |
| 7040243 | D0H4S114         | 1.26E-03 | 0.11 | 10.39 | 11.32 | 0.93 | 1.91 |
| 3060639 | Defb10           | 4.66E-03 | 0.17 | 6.69  | 7.62  | 0.93 | 1.90 |
| 5550671 | Ly6c1            | 8.28E-03 | 0.22 | 13.14 | 14.07 | 0.93 | 1.90 |
| 2370039 | Gpr171           | 1.35E-02 | 0.26 | 7.05  | 7.97  | 0.92 | 1.90 |
| 840209  | 6330406I15Rik    | 6.00E-03 | 0.19 | 9.37  | 10.29 | 0.92 | 1.90 |
| 1030082 | Mia1             | 4.81E-04 | 0.08 | 9.79  | 10.71 | 0.92 | 1.90 |
| 6520711 | 439_lg_heavy_var | 4.24E-03 | 0.17 | 7.19  | 8.11  | 0.92 | 1.90 |
| 6200037 | Cp               | 1.53E-03 | 0.12 | 7.44  | 8.35  | 0.91 | 1.88 |
| 5260541 | Cfb              | 1.60E-02 | 0.27 | 9.18  | 10.09 | 0.91 | 1.88 |
| 4200452 | D630010B17Rik    | 1.31E-02 | 0.25 | 6.76  | 7.67  | 0.90 | 1.87 |
| 1070630 | Tnfaip2          | 3.86E-03 | 0.16 | 8.01  | 8.91  | 0.90 | 1.87 |
| 2850521 | Rasl11a          | 1.54E-04 | 0.05 | 6.51  | 7.41  | 0.90 | 1.87 |
| 6180202 | LOC100044702     | 1.90E-02 | 0.29 | 9.78  | 10.68 | 0.90 | 1.87 |
| 6550671 | D17Wsu104e       | 6.44E-05 | 0.04 | 10.04 | 10.94 | 0.90 | 1.86 |
| 5820739 | Gp49a            | 8.21E-03 | 0.22 | 8.55  | 9.44  | 0.90 | 1.86 |
| 4880619 | Tmed3            | 3.53E-03 | 0.16 | 10.78 | 11.68 | 0.90 | 1.86 |
| 360427  | Megf11           | 1.91E-03 | 0.13 | 6.18  | 7.07  | 0.89 | 1.86 |
| 1340762 | Tiam2            | 1.28E-04 | 0.05 | 6.89  | 7.78  | 0.89 | 1.86 |

|         |               |          |      |       |       |      |      |
|---------|---------------|----------|------|-------|-------|------|------|
| 5860475 | Slc16a6       | 2.86E-04 | 0.06 | 7.36  | 8.26  | 0.89 | 1.86 |
| 2650019 | 6330406I15Rik | 4.45E-04 | 0.07 | 9.49  | 10.38 | 0.89 | 1.86 |
| 4480333 | Ppic          | 8.53E-04 | 0.10 | 10.92 | 11.81 | 0.89 | 1.85 |
| 7040717 | Ccl6          | 9.28E-03 | 0.22 | 8.59  | 9.48  | 0.88 | 1.85 |
| 4260025 | EG433016      | 8.72E-03 | 0.22 | 6.89  | 7.77  | 0.88 | 1.85 |
| 5490008 | St3gal1       | 1.08E-02 | 0.24 | 7.30  | 8.18  | 0.88 | 1.84 |
| 3120427 | Slc16a6       | 2.48E-04 | 0.06 | 8.31  | 9.18  | 0.87 | 1.83 |
| 650324  | Prss22        | 7.19E-03 | 0.21 | 7.69  | 8.55  | 0.87 | 1.82 |
| 4120167 | Slco2a1       | 1.79E-02 | 0.28 | 7.48  | 8.34  | 0.86 | 1.82 |
| 450133  | Tgfb1         | 1.24E-03 | 0.11 | 10.55 | 11.41 | 0.86 | 1.82 |
| 2570148 | Vcan          | 1.99E-03 | 0.13 | 6.85  | 7.71  | 0.86 | 1.81 |
| 4540615 | Cpne2         | 6.30E-04 | 0.09 | 7.41  | 8.27  | 0.86 | 1.81 |
| 6290528 | Cpne8         | 1.47E-03 | 0.12 | 8.79  | 9.65  | 0.86 | 1.81 |
| 5810538 | Ccdc80        | 1.54E-02 | 0.27 | 10.71 | 11.57 | 0.85 | 1.81 |
| 7400601 | Tnfaip2       | 1.18E-02 | 0.24 | 6.74  | 7.60  | 0.85 | 1.81 |
| 3400646 | Sirpa         | 7.77E-04 | 0.09 | 10.82 | 11.67 | 0.85 | 1.81 |
| 6550072 | Car9          | 6.99E-03 | 0.20 | 6.86  | 7.72  | 0.85 | 1.81 |
| 3990228 | Tmem44        | 1.27E-03 | 0.11 | 7.88  | 8.73  | 0.85 | 1.81 |
| 4390347 | Tmed9         | 1.08E-02 | 0.24 | 7.55  | 8.41  | 0.85 | 1.80 |
| 1260075 | Sec14l2       | 3.61E-03 | 0.16 | 7.77  | 8.62  | 0.85 | 1.80 |
| 2470228 | 6330404C01Rik | 5.18E-03 | 0.18 | 6.72  | 7.56  | 0.84 | 1.79 |
| 2480139 | Mia1          | 1.24E-04 | 0.05 | 9.22  | 10.05 | 0.84 | 1.79 |
| 5360056 | Clec4n        | 9.32E-03 | 0.22 | 7.66  | 8.50  | 0.84 | 1.79 |
| 7000746 | Darc          | 1.38E-02 | 0.26 | 8.25  | 9.09  | 0.84 | 1.78 |
| 130239  | Wisp1         | 1.14E-04 | 0.05 | 7.95  | 8.78  | 0.83 | 1.78 |
| 1940347 | Dab2          | 1.50E-03 | 0.12 | 10.26 | 11.10 | 0.83 | 1.78 |
| 5700382 | B430305P08Rik | 8.81E-03 | 0.22 | 9.18  | 10.01 | 0.83 | 1.78 |
| 540487  | 9930021D14Rik | 1.70E-03 | 0.12 | 6.29  | 7.12  | 0.83 | 1.78 |
| 6510240 | Nes           | 1.90E-02 | 0.29 | 7.05  | 7.88  | 0.83 | 1.77 |
| 6250452 | Ephb4         | 1.13E-03 | 0.11 | 9.36  | 10.18 | 0.83 | 1.77 |
| 7550356 | Slc38a10      | 1.62E-04 | 0.05 | 7.29  | 8.11  | 0.82 | 1.77 |
| 4780377 | Sec63         | 2.98E-03 | 0.15 | 9.53  | 10.36 | 0.82 | 1.77 |
| 2030066 | Npw           | 6.32E-03 | 0.20 | 6.27  | 7.10  | 0.82 | 1.77 |
| 6650156 | Preli2        | 4.29E-04 | 0.07 | 6.89  | 7.71  | 0.82 | 1.77 |
| 3310537 | P4ha2         | 2.53E-04 | 0.06 | 9.41  | 10.23 | 0.82 | 1.77 |
| 6620521 | Kcnk6         | 2.39E-03 | 0.14 | 8.62  | 9.44  | 0.82 | 1.77 |
| 3140041 | 2310046K01Rik | 2.13E-03 | 0.13 | 8.64  | 9.46  | 0.82 | 1.76 |
| 5870367 | LOC666403     | 1.57E-05 | 0.02 | 13.15 | 13.96 | 0.82 | 1.76 |
| 6520075 | Ier3          | 5.06E-04 | 0.08 | 11.33 | 12.15 | 0.82 | 1.76 |
| 4220717 | Ccl19         | 1.52E-02 | 0.27 | 6.95  | 7.76  | 0.81 | 1.76 |
| 4280519 | LOC384710     | 1.53E-03 | 0.12 | 10.55 | 11.37 | 0.81 | 1.75 |
| 3840731 | Ephb4         | 3.36E-03 | 0.16 | 8.52  | 9.33  | 0.81 | 1.75 |
| 1660129 | Dio2          | 1.10E-02 | 0.24 | 6.63  | 7.44  | 0.81 | 1.75 |
| 6520064 | Elmo1         | 1.21E-02 | 0.25 | 6.62  | 7.43  | 0.81 | 1.75 |
| 5700019 | Rcan1         | 1.44E-02 | 0.26 | 6.30  | 7.11  | 0.81 | 1.75 |
| 1190592 | Pard6g        | 5.82E-03 | 0.19 | 9.42  | 10.22 | 0.81 | 1.75 |
| 3840750 | Tnfaip2       | 8.15E-03 | 0.22 | 7.41  | 8.21  | 0.80 | 1.75 |

|         |                  |          |      |       |       |      |      |
|---------|------------------|----------|------|-------|-------|------|------|
| 2850133 | Msn              | 9.82E-04 | 0.10 | 8.49  | 9.29  | 0.80 | 1.74 |
| 2470242 | Hsd3b7           | 5.88E-05 | 0.04 | 11.31 | 12.11 | 0.80 | 1.74 |
| 840349  | Ifitm2           | 1.55E-04 | 0.05 | 12.83 | 13.63 | 0.80 | 1.74 |
| 6560487 | Sema3f           | 5.52E-03 | 0.19 | 9.91  | 10.71 | 0.80 | 1.74 |
| 870446  | H2-T10           | 1.73E-02 | 0.28 | 9.29  | 10.08 | 0.80 | 1.74 |
| 3190048 | Dctd             | 9.80E-03 | 0.23 | 8.18  | 8.98  | 0.80 | 1.74 |
| 1110762 | Upk1a            | 9.33E-03 | 0.22 | 9.41  | 10.20 | 0.79 | 1.74 |
| 3460736 | LOC100048332     | 1.09E-03 | 0.10 | 7.59  | 8.39  | 0.79 | 1.73 |
| 1050609 | Dab2             | 1.83E-03 | 0.12 | 9.94  | 10.74 | 0.79 | 1.73 |
| 2570372 | Tuba1a           | 1.02E-02 | 0.23 | 9.84  | 10.64 | 0.79 | 1.73 |
| 3290164 | LOC622994        | 1.58E-02 | 0.27 | 11.97 | 12.76 | 0.79 | 1.73 |
| 380369  | Napsa            | 5.50E-04 | 0.08 | 7.80  | 8.59  | 0.79 | 1.73 |
| 450309  | Rab8b            | 2.90E-03 | 0.15 | 9.73  | 10.52 | 0.79 | 1.73 |
| 610010  | Tnfrsf1a         | 3.01E-03 | 0.15 | 8.45  | 9.24  | 0.79 | 1.73 |
| 6550044 | Kank1            | 7.62E-04 | 0.09 | 9.84  | 10.62 | 0.79 | 1.72 |
| 2760561 | Plat             | 3.46E-05 | 0.03 | 10.62 | 11.40 | 0.78 | 1.72 |
| 1510564 | Asph             | 6.73E-03 | 0.20 | 6.40  | 7.18  | 0.78 | 1.72 |
| 5260725 | Adamts1          | 3.22E-03 | 0.15 | 7.15  | 7.93  | 0.78 | 1.72 |
| 7040181 | 2410008K03Rik    | 4.70E-04 | 0.08 | 7.98  | 8.76  | 0.78 | 1.72 |
| 110706  | Ppic             | 4.31E-03 | 0.17 | 8.73  | 9.51  | 0.78 | 1.72 |
| 5860435 | H2-Ab1           | 8.27E-03 | 0.22 | 10.96 | 11.74 | 0.78 | 1.72 |
| 2650681 | Mme              | 7.56E-03 | 0.21 | 8.71  | 9.49  | 0.78 | 1.72 |
| 2970743 | 9430047F21Rik    | 2.01E-02 | 0.30 | 7.05  | 7.83  | 0.78 | 1.72 |
| 3870139 | 467_lg_heavy_var | 1.26E-02 | 0.25 | 6.38  | 7.16  | 0.78 | 1.72 |
| 780546  | Htra3            | 1.82E-02 | 0.29 | 8.60  | 9.38  | 0.78 | 1.71 |
| 6020743 | LOC100047419     | 1.10E-03 | 0.11 | 9.01  | 9.79  | 0.78 | 1.71 |
| 1050671 | Fkbp11           | 4.72E-03 | 0.18 | 9.89  | 10.66 | 0.77 | 1.71 |
| 430301  | Tnfrsf22         | 5.80E-03 | 0.19 | 9.19  | 9.96  | 0.77 | 1.71 |
| 1440307 | H2-Ab1           | 8.24E-03 | 0.22 | 11.52 | 12.29 | 0.77 | 1.71 |
| 6040242 | Sema3f           | 3.76E-03 | 0.16 | 9.36  | 10.13 | 0.77 | 1.71 |
| 3520142 | Zbtb32           | 4.36E-04 | 0.07 | 7.35  | 8.12  | 0.77 | 1.71 |
| 5820528 | Csf2rb2          | 8.52E-03 | 0.22 | 7.56  | 8.33  | 0.77 | 1.71 |
| 7100021 | Hyou1            | 1.84E-04 | 0.05 | 8.09  | 8.86  | 0.77 | 1.71 |
| 1780474 | Msn              | 3.21E-03 | 0.15 | 7.78  | 8.56  | 0.77 | 1.71 |
| 4560609 | Tmem125          | 1.22E-02 | 0.25 | 9.10  | 9.87  | 0.77 | 1.71 |
| 2480132 | Prom             | 8.82E-03 | 0.22 | 9.20  | 9.96  | 0.77 | 1.70 |
| 1110326 | Fcgr2b           | 1.90E-02 | 0.29 | 9.26  | 10.02 | 0.77 | 1.70 |
| 4780239 | Tmem160          | 3.50E-04 | 0.07 | 10.89 | 11.65 | 0.76 | 1.69 |
| 2970332 | Klf2             | 1.71E-03 | 0.12 | 8.77  | 9.53  | 0.76 | 1.69 |
| 2030615 | Abo              | 7.40E-04 | 0.09 | 10.29 | 11.05 | 0.76 | 1.69 |
| 5670240 | Map3k6           | 2.05E-02 | 0.30 | 8.12  | 8.87  | 0.76 | 1.69 |
| 2060328 | Egfl7            | 1.23E-02 | 0.25 | 9.80  | 10.55 | 0.75 | 1.68 |
| 6040521 | Fbln2            | 2.21E-04 | 0.06 | 7.41  | 8.16  | 0.75 | 1.68 |
| 1260400 | Stxbp1           | 1.57E-03 | 0.12 | 10.76 | 11.51 | 0.75 | 1.68 |
| 6560301 | Cd53             | 1.28E-02 | 0.25 | 9.25  | 10.00 | 0.75 | 1.68 |
| 60600   | Mocs1            | 4.39E-04 | 0.07 | 10.46 | 11.21 | 0.75 | 1.68 |
| 870246  | Hif1a            | 1.25E-03 | 0.11 | 8.53  | 9.28  | 0.75 | 1.68 |

|         |               |          |      |       |       |      |      |
|---------|---------------|----------|------|-------|-------|------|------|
| 4070072 | LOC331139     | 1.08E-02 | 0.24 | 6.68  | 7.42  | 0.75 | 1.68 |
| 1090056 | Htr2b         | 4.36E-03 | 0.17 | 6.58  | 7.32  | 0.75 | 1.68 |
| 1230767 | Thbd          | 9.27E-03 | 0.22 | 9.61  | 10.36 | 0.74 | 1.67 |
| 1240259 | Comt          | 9.41E-03 | 0.23 | 10.36 | 11.10 | 0.74 | 1.67 |
| 5700066 | Spsb1         | 1.71E-02 | 0.28 | 9.06  | 9.80  | 0.74 | 1.67 |
| 2940138 | Ctla2b        | 2.00E-02 | 0.30 | 6.95  | 7.69  | 0.74 | 1.67 |
| 3130020 | Lrig1         | 1.84E-02 | 0.29 | 8.67  | 9.41  | 0.74 | 1.67 |
| 2810424 | Snx20         | 1.36E-02 | 0.26 | 6.91  | 7.65  | 0.74 | 1.67 |
| 6980446 | Dok1          | 4.49E-03 | 0.17 | 7.03  | 7.77  | 0.74 | 1.67 |
| 4780196 | Fxyd5         | 1.47E-02 | 0.27 | 9.48  | 10.22 | 0.74 | 1.67 |
| 4760041 | Tmem160       | 5.37E-04 | 0.08 | 10.08 | 10.82 | 0.74 | 1.67 |
| 6760228 | Elmo1         | 2.28E-03 | 0.13 | 9.18  | 9.92  | 0.74 | 1.67 |
| 4200735 | Fkbp2         | 7.20E-05 | 0.04 | 7.39  | 8.13  | 0.74 | 1.67 |
| 6900192 | Fn1           | 7.03E-03 | 0.20 | 7.58  | 8.32  | 0.74 | 1.67 |
| 1690019 | Mest          | 4.02E-03 | 0.17 | 6.10  | 6.84  | 0.74 | 1.66 |
| 3140524 | Gcg           | 1.53E-02 | 0.27 | 5.89  | 6.62  | 0.74 | 1.66 |
| 2120397 | Ccr5          | 1.34E-02 | 0.26 | 7.98  | 8.71  | 0.73 | 1.66 |
| 430561  | Bcat1         | 1.46E-02 | 0.26 | 6.60  | 7.33  | 0.73 | 1.66 |
| 3460026 | LOC100047167  | 3.09E-03 | 0.15 | 8.57  | 9.30  | 0.73 | 1.66 |
| 7610477 | Tm4sf1        | 2.91E-03 | 0.15 | 6.39  | 7.11  | 0.73 | 1.66 |
| 1780324 | Ccr5          | 1.30E-02 | 0.25 | 7.88  | 8.61  | 0.73 | 1.66 |
| 360053  | 5033414K04Rik | 1.50E-02 | 0.27 | 9.86  | 10.59 | 0.73 | 1.66 |
| 2630008 | Fxyd5         | 1.37E-02 | 0.26 | 10.46 | 11.18 | 0.73 | 1.66 |
| 2350368 | Mfsd2         | 1.91E-02 | 0.29 | 8.54  | 9.27  | 0.73 | 1.65 |
| 2900692 | Has2          | 1.90E-02 | 0.29 | 6.39  | 7.12  | 0.73 | 1.65 |
| 7330392 | Plekho2       | 7.73E-04 | 0.09 | 9.23  | 9.96  | 0.72 | 1.65 |
| 1820075 | Plek          | 4.60E-03 | 0.17 | 8.37  | 9.09  | 0.72 | 1.65 |
| 1940608 | Lyzs          | 1.16E-02 | 0.24 | 11.34 | 12.06 | 0.72 | 1.65 |
| 3890762 | 2600011E07Rik | 3.66E-03 | 0.16 | 6.86  | 7.58  | 0.72 | 1.65 |
| 7320138 | Klra17        | 1.91E-02 | 0.29 | 6.97  | 7.69  | 0.72 | 1.65 |
| 6100092 | Cpne8         | 7.56E-03 | 0.21 | 7.72  | 8.44  | 0.72 | 1.65 |
| 5560349 | Rftn1         | 1.24E-03 | 0.11 | 7.05  | 7.77  | 0.72 | 1.65 |
| 1740040 | Sec63         | 7.38E-04 | 0.09 | 9.55  | 10.27 | 0.72 | 1.65 |
| 20241   | Itga5         | 9.44E-03 | 0.23 | 6.94  | 7.65  | 0.72 | 1.65 |
| 6350324 | Gna14         | 1.55E-02 | 0.27 | 9.70  | 10.42 | 0.72 | 1.65 |
| 6330768 | Dusp6         | 8.75E-03 | 0.22 | 8.68  | 9.40  | 0.72 | 1.64 |
| 4280187 | Pira11        | 8.04E-03 | 0.22 | 7.12  | 7.84  | 0.72 | 1.64 |
| 6040364 | Hbegf         | 9.76E-03 | 0.23 | 7.69  | 8.41  | 0.71 | 1.64 |
| 3130630 | Cdkn1a        | 6.63E-03 | 0.20 | 10.47 | 11.18 | 0.71 | 1.64 |
| 1240095 | Snx24         | 8.30E-04 | 0.10 | 11.17 | 11.89 | 0.71 | 1.64 |
| 5310672 | Fxyd5         | 1.06E-02 | 0.23 | 8.66  | 9.37  | 0.71 | 1.64 |
| 580086  | Asph          | 9.76E-03 | 0.23 | 6.31  | 7.02  | 0.71 | 1.64 |
| 7510414 | Vwf           | 7.01E-03 | 0.20 | 8.90  | 9.61  | 0.71 | 1.64 |
| 6060520 | Ccl11         | 1.32E-04 | 0.05 | 8.52  | 9.23  | 0.71 | 1.64 |
| 1980156 | H2-BI         | 1.77E-04 | 0.05 | 6.26  | 6.97  | 0.71 | 1.64 |
| 5670465 | Pvrl3         | 1.44E-02 | 0.26 | 8.39  | 9.10  | 0.71 | 1.64 |
| 4060327 | Tgfbi         | 6.47E-03 | 0.20 | 8.53  | 9.23  | 0.71 | 1.63 |

|         |               |          |      |       |       |      |      |
|---------|---------------|----------|------|-------|-------|------|------|
| 1440192 | Rab8b         | 1.43E-03 | 0.12 | 10.35 | 11.06 | 0.71 | 1.63 |
| 2030463 | 1700066B19Rik | 4.08E-03 | 0.17 | 6.69  | 7.40  | 0.71 | 1.63 |
| 4260047 | Tulp4         | 1.70E-04 | 0.05 | 11.42 | 12.13 | 0.71 | 1.63 |
| 460576  | Fstl1         | 1.25E-02 | 0.25 | 10.18 | 10.88 | 0.71 | 1.63 |
| 6900180 | Asph          | 3.58E-03 | 0.16 | 7.05  | 7.76  | 0.71 | 1.63 |
| 3190438 | Mgst1         | 2.02E-02 | 0.30 | 11.19 | 11.89 | 0.70 | 1.63 |
| 5340615 | Asph          | 5.44E-03 | 0.18 | 6.78  | 7.48  | 0.70 | 1.63 |
| 2100139 | Bst2          | 1.74E-02 | 0.28 | 9.69  | 10.40 | 0.70 | 1.63 |
| 4040450 | Ahnak2        | 3.14E-03 | 0.15 | 9.27  | 9.97  | 0.70 | 1.63 |
| 1400360 | Pde4b         | 6.60E-03 | 0.20 | 6.30  | 7.00  | 0.70 | 1.63 |
| 1050672 | Dab2          | 6.10E-03 | 0.19 | 7.90  | 8.60  | 0.70 | 1.63 |
| 1770634 | Gpr176        | 1.52E-02 | 0.27 | 7.66  | 8.36  | 0.70 | 1.62 |
| 4780112 | D16Ert472e    | 4.64E-03 | 0.17 | 8.63  | 9.33  | 0.70 | 1.62 |
| 2480725 | Coro1a        | 1.47E-02 | 0.27 | 7.94  | 8.64  | 0.70 | 1.62 |
| 670133  | Hmgn3         | 1.72E-02 | 0.28 | 10.63 | 11.33 | 0.69 | 1.62 |
| 5270100 | 1200002N14Rik | 7.55E-03 | 0.21 | 10.35 | 11.04 | 0.69 | 1.62 |
| 70239   | Elmo1         | 3.99E-03 | 0.16 | 6.35  | 7.04  | 0.69 | 1.62 |
| 5310601 | C530008M17Rik | 1.09E-02 | 0.24 | 6.94  | 7.63  | 0.69 | 1.62 |
| 3290239 | Plvap         | 1.23E-03 | 0.11 | 9.21  | 9.90  | 0.69 | 1.62 |
| 7160059 | Tnfrsf1a      | 4.84E-04 | 0.08 | 8.52  | 9.21  | 0.69 | 1.62 |
| 110647  | LOC668387     | 8.50E-03 | 0.22 | 10.93 | 11.62 | 0.69 | 1.62 |
| 7560563 | Wwtr1         | 7.42E-03 | 0.21 | 9.60  | 10.29 | 0.69 | 1.62 |
| 3420440 | Megf11        | 5.65E-05 | 0.04 | 6.33  | 7.02  | 0.69 | 1.62 |
| 4050112 | Glrx          | 1.65E-02 | 0.28 | 10.04 | 10.73 | 0.69 | 1.61 |
| 4880288 | Sytl3         | 2.49E-03 | 0.14 | 7.81  | 8.50  | 0.69 | 1.61 |
| 450368  | Rgs1          | 2.89E-03 | 0.15 | 7.12  | 7.81  | 0.69 | 1.61 |
| 2060291 | Egfl7         | 1.32E-02 | 0.25 | 7.95  | 8.63  | 0.69 | 1.61 |
| 2360711 | 4930519N16Rik | 1.89E-04 | 0.05 | 6.89  | 7.57  | 0.69 | 1.61 |
| 6280167 | Plxnd1        | 3.83E-03 | 0.16 | 8.48  | 9.16  | 0.69 | 1.61 |
| 6060561 | Adam9         | 7.03E-03 | 0.20 | 10.43 | 11.12 | 0.68 | 1.61 |
| 1820402 | Akap2         | 8.79E-03 | 0.22 | 8.24  | 8.92  | 0.68 | 1.60 |
| 1450601 | Ndr2          | 1.79E-03 | 0.12 | 7.50  | 8.18  | 0.68 | 1.60 |
| 6960333 | Agr2          | 1.44E-02 | 0.26 | 7.34  | 8.02  | 0.68 | 1.60 |
| 3170719 | Camk2n2       | 6.35E-03 | 0.20 | 8.66  | 9.34  | 0.68 | 1.60 |
| 1230102 | Dock6         | 3.37E-03 | 0.16 | 8.84  | 9.52  | 0.68 | 1.60 |
| 4920138 | Slc20a1       | 2.89E-03 | 0.15 | 6.81  | 7.48  | 0.68 | 1.60 |
| 6510687 | Grasp         | 1.15E-02 | 0.24 | 6.91  | 7.58  | 0.68 | 1.60 |
| 7330114 | Pira4         | 1.85E-02 | 0.29 | 7.78  | 8.46  | 0.68 | 1.60 |
| 3180156 | Tnfrsf18      | 6.88E-03 | 0.20 | 7.07  | 7.75  | 0.68 | 1.60 |
| 1450368 | Adamts1       | 9.10E-04 | 0.10 | 6.81  | 7.48  | 0.67 | 1.60 |
| 4290544 | Nav1          | 1.43E-02 | 0.26 | 9.94  | 10.61 | 0.67 | 1.60 |
| 7040491 | Cdkn1a        | 1.64E-02 | 0.28 | 8.61  | 9.28  | 0.67 | 1.59 |
| 2320176 | Rnf125        | 1.74E-02 | 0.28 | 7.23  | 7.90  | 0.67 | 1.59 |
| 730706  | Serpinh1      | 1.88E-02 | 0.29 | 11.58 | 12.25 | 0.67 | 1.59 |
| 510739  | Pdia6         | 1.25E-04 | 0.05 | 8.90  | 9.57  | 0.67 | 1.59 |
| 1770468 | Adssl1        | 4.06E-04 | 0.07 | 8.83  | 9.50  | 0.67 | 1.59 |
| 3360343 | Pde1b         | 6.93E-03 | 0.20 | 7.44  | 8.11  | 0.67 | 1.59 |

|         |               |          |      |       |       |      |      |
|---------|---------------|----------|------|-------|-------|------|------|
| 1030739 | Pecam1        | 1.64E-03 | 0.12 | 8.27  | 8.94  | 0.67 | 1.59 |
| 5290026 | Fcer1a        | 1.41E-02 | 0.26 | 7.00  | 7.67  | 0.67 | 1.59 |
| 2370554 | 2210412E05Rik | 8.24E-04 | 0.10 | 6.20  | 6.87  | 0.67 | 1.59 |
| 6480192 | Ttc39b        | 2.01E-03 | 0.13 | 8.08  | 8.75  | 0.67 | 1.59 |
| 3850609 | Insl3         | 1.80E-03 | 0.12 | 8.33  | 9.00  | 0.67 | 1.59 |
| 1240646 | Ccr5          | 5.57E-03 | 0.19 | 7.76  | 8.43  | 0.66 | 1.59 |
| 4560626 | Glo1          | 4.02E-04 | 0.07 | 11.26 | 11.92 | 0.66 | 1.58 |
| 5910220 | Osmr          | 1.04E-02 | 0.23 | 9.77  | 10.43 | 0.66 | 1.58 |
| 4590241 | Gpr35         | 9.14E-04 | 0.10 | 6.85  | 7.52  | 0.66 | 1.58 |
| 5960743 | F730003B03Rik | 9.78E-03 | 0.23 | 6.25  | 6.92  | 0.66 | 1.58 |
| 4040255 | Thsd1         | 4.17E-03 | 0.17 | 6.46  | 7.12  | 0.66 | 1.58 |
| 610349  | Ly6f          | 7.62E-04 | 0.09 | 6.50  | 7.16  | 0.66 | 1.58 |
| 1500463 | Coro1a        | 1.38E-02 | 0.26 | 9.60  | 10.26 | 0.66 | 1.58 |
| 360086  | Magi1         | 1.69E-02 | 0.28 | 8.79  | 9.45  | 0.66 | 1.58 |
| 5820767 | 4930477M19    | 2.32E-03 | 0.13 | 6.98  | 7.64  | 0.66 | 1.58 |
| 450528  | Ifitm1        | 2.03E-02 | 0.30 | 6.65  | 7.30  | 0.66 | 1.58 |
| 1230564 | Ugcg          | 8.48E-06 | 0.02 | 11.60 | 12.26 | 0.66 | 1.58 |
| 3420056 | Pde1b         | 1.81E-02 | 0.29 | 7.54  | 8.19  | 0.66 | 1.58 |
| 7200767 | Lrrk2         | 1.03E-02 | 0.23 | 6.77  | 7.42  | 0.66 | 1.58 |
| 4830551 | Napsa         | 1.22E-02 | 0.25 | 7.11  | 7.77  | 0.66 | 1.58 |
| 5960754 | P4ha2         | 1.05E-02 | 0.23 | 8.61  | 9.27  | 0.66 | 1.58 |
| 7150259 | Naip1         | 8.69E-03 | 0.22 | 7.51  | 8.17  | 0.66 | 1.58 |
| 4060022 | AI448196      | 2.26E-03 | 0.13 | 7.06  | 7.71  | 0.65 | 1.57 |
| 3190689 | Adssl1        | 2.93E-03 | 0.15 | 7.71  | 8.37  | 0.65 | 1.57 |
| 1110440 | Pdgfrl        | 8.48E-04 | 0.10 | 7.34  | 8.00  | 0.65 | 1.57 |
| 5900440 | Fgd2          | 1.61E-04 | 0.05 | 8.43  | 9.09  | 0.65 | 1.57 |
| 4290403 | Zeb1          | 3.47E-03 | 0.16 | 9.39  | 10.04 | 0.65 | 1.57 |
| 130093  | Il4ra         | 3.98E-03 | 0.16 | 6.27  | 6.92  | 0.65 | 1.57 |
| 5130139 | Tgfb1         | 2.80E-03 | 0.15 | 7.91  | 8.56  | 0.65 | 1.57 |
| 1030475 | Ssbp4         | 1.51E-03 | 0.12 | 10.59 | 11.24 | 0.65 | 1.57 |
| 2750167 | Npal1         | 1.46E-02 | 0.26 | 7.32  | 7.97  | 0.65 | 1.57 |
| 2320767 | Aars          | 7.78E-04 | 0.09 | 10.92 | 11.57 | 0.65 | 1.57 |
| 780088  | Elmo1         | 3.58E-03 | 0.16 | 6.40  | 7.04  | 0.64 | 1.56 |
| 5900274 | Gyltl1b       | 1.12E-03 | 0.11 | 10.37 | 11.01 | 0.64 | 1.56 |
| 5560482 | Gda           | 6.77E-03 | 0.20 | 6.98  | 7.62  | 0.64 | 1.56 |
| 4570066 | Nos3          | 2.06E-02 | 0.30 | 7.04  | 7.68  | 0.64 | 1.56 |
| 1170278 | Pcdh7         | 1.84E-02 | 0.29 | 7.22  | 7.86  | 0.64 | 1.56 |
| 1580309 | Hap1          | 4.22E-03 | 0.17 | 10.04 | 10.67 | 0.64 | 1.56 |
| 3850722 | Sec24d        | 1.12E-03 | 0.11 | 8.52  | 9.16  | 0.64 | 1.55 |
| 2340242 | Fgl2          | 1.17E-02 | 0.24 | 8.61  | 9.25  | 0.64 | 1.55 |
| 7560685 | Tnfrsf1a      | 1.11E-03 | 0.11 | 8.50  | 9.14  | 0.64 | 1.55 |
| 2970736 | Sox7          | 1.39E-02 | 0.26 | 6.94  | 7.57  | 0.63 | 1.55 |
| 4490592 | Pip5k1c       | 1.79E-03 | 0.12 | 8.60  | 9.23  | 0.63 | 1.55 |
| 2690070 | Fbln1         | 1.38E-02 | 0.26 | 11.67 | 12.31 | 0.63 | 1.55 |
| 5890494 | Hsd3b7        | 5.42E-04 | 0.08 | 10.35 | 10.98 | 0.63 | 1.55 |
| 5270021 | Emcn          | 1.37E-03 | 0.11 | 9.06  | 9.69  | 0.63 | 1.55 |
| 6940315 | AW548124      | 4.45E-03 | 0.17 | 7.04  | 7.67  | 0.63 | 1.55 |

|         |                  |          |      |       |       |      |      |
|---------|------------------|----------|------|-------|-------|------|------|
| 1070593 | Smo              | 8.51E-03 | 0.22 | 8.81  | 9.44  | 0.63 | 1.55 |
| 5130059 | Ifitm6           | 6.42E-03 | 0.20 | 7.84  | 8.47  | 0.63 | 1.55 |
| 7050450 | Gmfg             | 1.03E-03 | 0.10 | 8.85  | 9.48  | 0.63 | 1.55 |
| 6450600 | Gramd1b          | 2.41E-03 | 0.14 | 8.73  | 9.35  | 0.63 | 1.55 |
| 1030497 | Irak3            | 1.70E-02 | 0.28 | 8.73  | 9.36  | 0.63 | 1.54 |
| 5960020 | Fmn12            | 4.59E-04 | 0.07 | 9.46  | 10.09 | 0.63 | 1.54 |
| 780315  | LOC641240        | 2.65E-03 | 0.14 | 11.79 | 12.42 | 0.63 | 1.54 |
| 5900452 | Cyr61            | 8.13E-03 | 0.22 | 8.00  | 8.62  | 0.63 | 1.54 |
| 5910164 | Emilin2          | 1.06E-02 | 0.23 | 8.87  | 9.50  | 0.63 | 1.54 |
| 610600  | Hmgn2            | 3.49E-03 | 0.16 | 12.75 | 13.37 | 0.62 | 1.54 |
| 2450577 | Ttc39b           | 4.78E-03 | 0.18 | 7.16  | 7.78  | 0.62 | 1.54 |
| 360167  | Jl-pending FRAGM | 5.66E-03 | 0.19 | 6.64  | 7.26  | 0.62 | 1.54 |
| 4290368 | Acsl4            | 1.54E-03 | 0.12 | 7.58  | 8.20  | 0.62 | 1.54 |
| 6020324 | Fxr2             | 1.13E-02 | 0.24 | 7.75  | 8.37  | 0.62 | 1.54 |
| 430278  | Plip             | 1.66E-02 | 0.28 | 8.45  | 9.07  | 0.62 | 1.54 |
| 4850731 | Nav1             | 4.81E-03 | 0.18 | 10.05 | 10.67 | 0.62 | 1.53 |
| 1990176 | Pilra            | 1.21E-03 | 0.11 | 7.24  | 7.86  | 0.62 | 1.53 |
| 7570315 | Agpat4           | 7.46E-03 | 0.21 | 7.89  | 8.51  | 0.62 | 1.53 |
| 2650349 | Gipc1            | 1.56E-02 | 0.27 | 8.17  | 8.79  | 0.62 | 1.53 |
| 650707  | H2-Aa            | 5.61E-03 | 0.19 | 11.99 | 12.60 | 0.62 | 1.53 |
| 5130070 | 3830612M24       | 1.38E-03 | 0.11 | 7.53  | 8.15  | 0.61 | 1.53 |
| 520072  | H2-Eb1           | 1.11E-02 | 0.24 | 12.03 | 12.65 | 0.61 | 1.53 |
| 4640220 | Tnfrsf22         | 2.90E-03 | 0.15 | 7.48  | 8.10  | 0.61 | 1.53 |
| 7160022 | Lmcd1            | 2.04E-03 | 0.13 | 8.24  | 8.86  | 0.61 | 1.53 |
| 4890139 | Lrrc49           | 4.02E-03 | 0.17 | 8.42  | 9.03  | 0.61 | 1.53 |
| 3360189 | Ern1             | 1.01E-04 | 0.04 | 9.82  | 10.44 | 0.61 | 1.53 |
| 830072  | Lilrb4           | 1.45E-02 | 0.26 | 7.48  | 8.09  | 0.61 | 1.53 |
| 7320703 | Kcnk6            | 9.31E-03 | 0.22 | 7.71  | 8.32  | 0.61 | 1.52 |
| 2120471 | Atp6v0a1         | 1.26E-03 | 0.11 | 7.38  | 7.99  | 0.61 | 1.52 |
| 1570551 | Mmp9             | 1.01E-02 | 0.23 | 8.19  | 8.79  | 0.61 | 1.52 |
| 6130041 | Rap1gap          | 4.18E-03 | 0.17 | 6.67  | 7.27  | 0.60 | 1.52 |
| 4760521 | 2210409H10Rik    | 8.53E-03 | 0.22 | 6.13  | 6.73  | 0.60 | 1.52 |
| 5050653 | Igf2             | 7.49E-03 | 0.21 | 8.69  | 9.29  | 0.60 | 1.52 |
| 730692  | Eml1             | 7.11E-03 | 0.20 | 10.66 | 11.26 | 0.60 | 1.52 |
| 4900315 | 6230425C21Rik    | 3.30E-03 | 0.16 | 7.76  | 8.37  | 0.60 | 1.52 |
| 3850463 | Traf1            | 3.25E-03 | 0.15 | 6.66  | 7.27  | 0.60 | 1.52 |
| 2490274 | 3010031K01Rik    | 1.83E-02 | 0.29 | 8.47  | 9.07  | 0.60 | 1.52 |
| 7200739 | Sulf2            | 4.30E-03 | 0.17 | 10.36 | 10.96 | 0.60 | 1.52 |
| 6420044 | Bace2            | 2.30E-05 | 0.03 | 6.86  | 7.46  | 0.60 | 1.52 |
| 3190379 | Sytl3            | 3.93E-03 | 0.16 | 7.60  | 8.20  | 0.60 | 1.51 |
| 2750706 | Fcer2a           | 4.13E-03 | 0.17 | 6.89  | 7.49  | 0.60 | 1.51 |
| 4920215 | Myo1b            | 9.17E-03 | 0.22 | 7.56  | 8.16  | 0.60 | 1.51 |
| 2320445 | Ankrd22          | 8.32E-03 | 0.22 | 8.50  | 9.10  | 0.60 | 1.51 |
| 1770376 | Glis1            | 7.70E-03 | 0.21 | 6.19  | 6.78  | 0.60 | 1.51 |
| 10753   | Ehd3             | 1.69E-02 | 0.28 | 6.82  | 7.41  | 0.59 | 1.51 |
| 4230348 | Cebpb            | 2.06E-02 | 0.30 | 11.04 | 11.63 | 0.59 | 1.51 |
| 6560598 | Guk1             | 6.31E-03 | 0.20 | 11.55 | 12.14 | 0.59 | 1.51 |

|         |               |          |      |       |       |       |       |
|---------|---------------|----------|------|-------|-------|-------|-------|
| 6980468 | Grk5          | 6.68E-03 | 0.20 | 6.26  | 6.86  | 0.59  | 1.51  |
| 7550196 | 9930014A18Rik | 1.04E-02 | 0.23 | 7.48  | 8.07  | 0.59  | 1.51  |
| 4210440 | Ugcg          | 3.55E-04 | 0.07 | 11.67 | 12.26 | 0.59  | 1.51  |
| 380438  | Tshz3         | 9.95E-03 | 0.23 | 8.15  | 8.74  | 0.59  | 1.51  |
| 3180215 | Nr4a2         | 3.75E-03 | 0.16 | 6.63  | 7.22  | 0.59  | 1.50  |
| 3800070 | Selpl         | 5.59E-03 | 0.19 | 7.17  | 7.76  | 0.59  | 1.50  |
| 270523  | Sparcl1       | 9.72E-03 | 0.23 | 8.49  | 9.07  | 0.59  | 1.50  |
| 1300725 | Ndufb10       | 5.83E-05 | 0.04 | 8.84  | 9.42  | 0.59  | 1.50  |
| 580438  | Tmem87b       | 5.95E-03 | 0.19 | 8.88  | 9.46  | 0.59  | 1.50  |
| 4560044 | LOC100040736  | 7.47E-03 | 0.21 | 6.32  | 6.91  | 0.59  | 1.50  |
| 4290630 | Ank3          | 1.44E-04 | 0.05 | 9.82  | 9.23  | -0.59 | -1.50 |
| 2680372 | Fhod1         | 1.34E-03 | 0.11 | 10.15 | 9.56  | -0.59 | -1.50 |
| 5570132 | Ppm1l         | 1.20E-03 | 0.11 | 9.06  | 8.47  | -0.59 | -1.50 |
| 6650209 | Fgf1          | 2.70E-04 | 0.06 | 10.14 | 9.55  | -0.59 | -1.50 |
| 5670326 | Phc1          | 9.52E-05 | 0.04 | 9.48  | 8.89  | -0.59 | -1.51 |
| 3460670 | Oxct1         | 2.93E-03 | 0.15 | 11.99 | 11.40 | -0.59 | -1.51 |
| 2320102 | Rasgef1a      | 1.26E-03 | 0.11 | 7.37  | 6.77  | -0.59 | -1.51 |
| 7560327 | Slc35a1       | 2.16E-03 | 0.13 | 8.20  | 7.61  | -0.59 | -1.51 |
| 4810259 | ORF9          | 1.19E-02 | 0.24 | 10.47 | 9.88  | -0.59 | -1.51 |
| 2600424 | Sqrdl         | 9.41E-03 | 0.23 | 10.80 | 10.21 | -0.59 | -1.51 |
| 2570131 | Dlg3          | 5.17E-03 | 0.18 | 10.51 | 9.91  | -0.60 | -1.51 |
| 2810326 | Fam116b       | 1.06E-02 | 0.23 | 8.43  | 7.83  | -0.60 | -1.51 |
| 1050670 | Fkbp4         | 2.11E-03 | 0.13 | 12.34 | 11.74 | -0.60 | -1.51 |
| 110500  | Ovol2         | 8.29E-03 | 0.22 | 7.95  | 7.36  | -0.60 | -1.51 |
| 3800767 | Lhfp1l        | 1.27E-03 | 0.11 | 7.19  | 6.59  | -0.60 | -1.51 |
| 7200678 | Gab1          | 1.27E-03 | 0.11 | 11.56 | 10.96 | -0.60 | -1.51 |
| 4070358 | Ihpk2         | 9.85E-04 | 0.10 | 7.79  | 7.19  | -0.60 | -1.51 |
| 6420494 | 2210008F06Rik | 1.13E-02 | 0.24 | 7.08  | 6.48  | -0.60 | -1.52 |
| 2000494 | Dusp10        | 9.98E-03 | 0.23 | 8.03  | 7.43  | -0.60 | -1.52 |
| 5490719 | Dcxr          | 5.14E-03 | 0.18 | 11.39 | 10.78 | -0.61 | -1.52 |
| 1010050 | Lmo4          | 1.63E-03 | 0.12 | 13.10 | 12.49 | -0.61 | -1.52 |
| 1580008 | Aim1          | 5.51E-04 | 0.08 | 10.66 | 10.05 | -0.61 | -1.52 |
| 6660452 | Ssx2ip        | 7.67E-04 | 0.09 | 10.19 | 9.59  | -0.61 | -1.52 |
| 7040767 | Rab12a        | 2.72E-03 | 0.14 | 9.55  | 8.94  | -0.61 | -1.52 |
| 830360  | Sh3yl1        | 4.09E-03 | 0.17 | 11.69 | 11.08 | -0.61 | -1.53 |
| 3710735 | Xkr9          | 3.53E-03 | 0.16 | 7.89  | 7.28  | -0.61 | -1.53 |
| 2810673 | Mpp6          | 1.69E-03 | 0.12 | 8.49  | 7.88  | -0.61 | -1.53 |
| 4540612 | Igsf4a        | 4.96E-06 | 0.02 | 10.77 | 10.16 | -0.61 | -1.53 |
| 5390411 | Uhrf2         | 3.68E-03 | 0.16 | 9.65  | 9.04  | -0.61 | -1.53 |
| 7150671 | Ddo           | 8.95E-04 | 0.10 | 7.59  | 6.98  | -0.61 | -1.53 |
| 6650376 | Tcfap2a       | 8.06E-03 | 0.22 | 8.90  | 8.28  | -0.61 | -1.53 |
| 1450364 | Six1          | 3.44E-03 | 0.16 | 11.08 | 10.47 | -0.61 | -1.53 |
| 6580044 | Dcp1b         | 1.57E-05 | 0.02 | 9.74  | 9.13  | -0.61 | -1.53 |
| 4260653 | Yeats2        | 1.13E-02 | 0.24 | 10.15 | 9.53  | -0.61 | -1.53 |
| 4540020 | Dnajb1        | 4.42E-04 | 0.07 | 11.51 | 10.89 | -0.62 | -1.53 |
| 4480202 | Agl           | 1.15E-02 | 0.24 | 9.46  | 8.84  | -0.62 | -1.53 |
| 3870736 | BC023744      | 7.56E-03 | 0.21 | 10.56 | 9.95  | -0.62 | -1.53 |



|         |               |          |      |       |       |       |       |
|---------|---------------|----------|------|-------|-------|-------|-------|
| 4810546 | Mcf2l         | 1.25E-02 | 0.25 | 9.99  | 9.37  | -0.62 | -1.54 |
| 2900021 | Morn2         | 4.20E-04 | 0.07 | 8.67  | 8.05  | -0.62 | -1.54 |
| 3870768 | Crebl2        | 1.40E-02 | 0.26 | 8.76  | 8.14  | -0.62 | -1.54 |
| 7400328 | Acpl2         | 5.64E-04 | 0.08 | 11.97 | 11.35 | -0.62 | -1.54 |
| 7570390 | 9330175B01Rik | 3.33E-03 | 0.16 | 8.91  | 8.29  | -0.62 | -1.54 |
| 4640731 | 5330432B20Rik | 3.42E-04 | 0.07 | 6.87  | 6.25  | -0.62 | -1.54 |
| 1410348 | F2rl1         | 6.45E-03 | 0.20 | 10.17 | 9.55  | -0.62 | -1.54 |
| 5870537 | Uhrf2         | 4.97E-04 | 0.08 | 8.89  | 8.27  | -0.62 | -1.54 |
| 1070192 | ORF9          | 1.01E-02 | 0.23 | 8.84  | 8.22  | -0.62 | -1.54 |
| 2750064 | Abcd3         | 1.51E-05 | 0.02 | 10.60 | 9.98  | -0.62 | -1.54 |
| 3170110 | Pygb          | 2.56E-03 | 0.14 | 12.95 | 12.33 | -0.63 | -1.54 |
| 1170706 | Krt19         | 4.85E-03 | 0.18 | 13.31 | 12.68 | -0.63 | -1.54 |
| 6020176 | Ank3          | 1.02E-03 | 0.10 | 9.67  | 9.04  | -0.63 | -1.54 |
| 4850097 | Ppfibp2       | 6.16E-03 | 0.19 | 8.54  | 7.92  | -0.63 | -1.55 |
| 2690270 | Tarsl2        | 5.62E-03 | 0.19 | 8.41  | 7.78  | -0.63 | -1.55 |
| 7560253 | Abcd3         | 9.57E-04 | 0.10 | 12.30 | 11.67 | -0.63 | -1.55 |
| 1500653 | Phkb          | 4.04E-03 | 0.17 | 10.12 | 9.49  | -0.63 | -1.55 |
| 5090079 | Hdac11        | 8.48E-03 | 0.22 | 8.60  | 7.97  | -0.63 | -1.55 |
| 4830731 | Nsbp1         | 3.45E-03 | 0.16 | 9.44  | 8.81  | -0.63 | -1.55 |
| 2570228 | Ugt8a         | 1.74E-02 | 0.28 | 7.15  | 6.52  | -0.63 | -1.55 |
| 3710544 | Mgst3         | 4.79E-03 | 0.18 | 10.92 | 10.29 | -0.63 | -1.55 |
| 2690132 | Fpgs          | 5.41E-04 | 0.08 | 7.91  | 7.27  | -0.64 | -1.55 |
| 5700575 | Bid           | 8.25E-03 | 0.22 | 9.18  | 8.54  | -0.64 | -1.56 |
| 3290703 | Hist1h2bg     | 3.76E-04 | 0.07 | 7.90  | 7.26  | -0.64 | -1.56 |
| 4010020 | Cyp27a1       | 1.65E-02 | 0.28 | 9.63  | 8.99  | -0.64 | -1.56 |
| 6760088 | Ifngr2        | 1.59E-03 | 0.12 | 9.38  | 8.74  | -0.64 | -1.56 |
| 1450369 | Osgepl1       | 6.59E-04 | 0.09 | 8.41  | 7.76  | -0.64 | -1.56 |
| 20615   | Ppm1l         | 2.51E-03 | 0.14 | 7.67  | 7.02  | -0.64 | -1.56 |
| 4850017 | Abcd3         | 2.53E-03 | 0.14 | 9.46  | 8.82  | -0.64 | -1.56 |
| 4280471 | Tlcd1         | 4.00E-04 | 0.07 | 9.02  | 8.37  | -0.65 | -1.56 |
| 2100309 | 9630058J23Rik | 5.25E-03 | 0.18 | 9.35  | 8.70  | -0.65 | -1.57 |
| 3370025 | Pkia          | 1.69E-03 | 0.12 | 9.48  | 8.83  | -0.65 | -1.57 |
| 6580402 | Evpl          | 2.36E-03 | 0.14 | 9.80  | 9.15  | -0.65 | -1.57 |
| 2940095 | Man1c1        | 2.16E-03 | 0.13 | 8.14  | 7.49  | -0.65 | -1.57 |
| 5270594 | Msl2l1        | 2.23E-03 | 0.13 | 9.60  | 8.95  | -0.65 | -1.57 |
| 1710349 | Esrrg         | 1.89E-02 | 0.29 | 8.51  | 7.85  | -0.65 | -1.57 |
| 450603  | Esrrg         | 1.95E-02 | 0.29 | 9.03  | 8.38  | -0.65 | -1.57 |
| 580717  | Uhrf2         | 1.05E-03 | 0.10 | 12.10 | 11.45 | -0.65 | -1.57 |
| 5820204 | Emp2          | 5.42E-04 | 0.08 | 10.94 | 10.29 | -0.65 | -1.57 |
| 4210669 | 1190002N15Rik | 1.21E-03 | 0.11 | 8.91  | 8.25  | -0.65 | -1.57 |
| 1030167 | Sec14l4       | 2.44E-03 | 0.14 | 8.73  | 8.08  | -0.65 | -1.57 |
| 5420482 | Entpd8        | 5.04E-03 | 0.18 | 7.12  | 6.47  | -0.65 | -1.57 |
| 460167  | Ptpn14        | 1.18E-02 | 0.24 | 7.59  | 6.93  | -0.66 | -1.58 |
| 1170121 | Nme5          | 1.35E-04 | 0.05 | 7.83  | 7.17  | -0.66 | -1.58 |
| 5050066 | Ppm1l         | 4.21E-04 | 0.07 | 8.53  | 7.87  | -0.66 | -1.58 |
| 580369  | Cadps2        | 9.75E-04 | 0.10 | 12.01 | 11.35 | -0.66 | -1.58 |
| 6200367 | Ncaph         | 7.36E-03 | 0.21 | 9.46  | 8.80  | -0.66 | -1.58 |

|         |               |          |      |       |       |       |       |
|---------|---------------|----------|------|-------|-------|-------|-------|
| 4670689 | 2410025L10Rik | 1.11E-03 | 0.11 | 11.49 | 10.83 | -0.67 | -1.59 |
| 380332  | Liph          | 2.94E-03 | 0.15 | 11.36 | 10.69 | -0.67 | -1.59 |
| 3190736 | A430107N10Rik | 5.21E-03 | 0.18 | 7.01  | 6.34  | -0.67 | -1.59 |
| 3890167 | Rgs9bp        | 6.41E-05 | 0.04 | 7.48  | 6.81  | -0.67 | -1.59 |
| 1300008 | 2210021J22Rik | 5.29E-04 | 0.08 | 7.82  | 7.15  | -0.67 | -1.60 |
| 770168  | Gnmt          | 1.39E-02 | 0.26 | 7.00  | 6.32  | -0.68 | -1.60 |
| 4290114 | Cib2          | 3.86E-03 | 0.16 | 8.45  | 7.77  | -0.68 | -1.60 |
| 5270270 | Mapk9         | 2.06E-04 | 0.05 | 9.05  | 8.37  | -0.68 | -1.60 |
| 4900369 | Fam84a        | 9.87E-03 | 0.23 | 9.51  | 8.84  | -0.68 | -1.60 |
| 5870601 | Ptprd         | 1.06E-02 | 0.23 | 7.96  | 7.29  | -0.68 | -1.60 |
| 1070754 | Tgm5          | 2.37E-03 | 0.14 | 8.02  | 7.34  | -0.68 | -1.60 |
| 4610338 | Efs           | 6.75E-03 | 0.20 | 9.92  | 9.24  | -0.68 | -1.61 |
| 3850440 | A930005I04Rik | 4.84E-04 | 0.08 | 8.32  | 7.64  | -0.68 | -1.61 |
| 1710204 | C130090K23Rik | 2.50E-03 | 0.14 | 7.62  | 6.94  | -0.68 | -1.61 |
| 6770196 | Agf           | 6.56E-03 | 0.20 | 9.87  | 9.19  | -0.69 | -1.61 |
| 6770037 | Rab26         | 1.86E-02 | 0.29 | 6.87  | 6.18  | -0.69 | -1.61 |
| 2360743 | AW544981      | 5.37E-05 | 0.04 | 8.92  | 8.23  | -0.69 | -1.61 |
| 1030209 | AW061290      | 8.58E-03 | 0.22 | 8.44  | 7.75  | -0.69 | -1.61 |
| 3310025 | D4Bwg0951e    | 2.63E-04 | 0.06 | 11.77 | 11.08 | -0.69 | -1.61 |
| 3940017 | Bcl2l13       | 1.43E-04 | 0.05 | 9.21  | 8.52  | -0.69 | -1.61 |
| 5220689 | Hist1h4a      | 2.26E-03 | 0.13 | 11.77 | 11.08 | -0.69 | -1.61 |
| 4180446 | Elf3          | 2.03E-02 | 0.30 | 9.22  | 8.52  | -0.69 | -1.62 |
| 290209  | Tgm5          | 2.66E-03 | 0.14 | 8.03  | 7.33  | -0.69 | -1.62 |
| 6220632 | Mtap2         | 1.31E-03 | 0.11 | 9.88  | 9.19  | -0.70 | -1.62 |
| 5670750 | C030014I23Rik | 6.63E-03 | 0.20 | 7.98  | 7.29  | -0.70 | -1.62 |
| 1440575 | Nudt19        | 4.49E-04 | 0.07 | 10.92 | 10.22 | -0.70 | -1.62 |
| 4610010 | Slc5a9        | 3.73E-03 | 0.16 | 8.71  | 8.01  | -0.70 | -1.63 |
| 3420500 | Oxct1         | 3.40E-03 | 0.16 | 12.46 | 11.75 | -0.70 | -1.63 |
| 60059   | Zfp251        | 8.57E-04 | 0.10 | 9.56  | 8.85  | -0.70 | -1.63 |
| 5810021 | Cdon          | 1.32E-03 | 0.11 | 9.09  | 8.39  | -0.71 | -1.63 |
| 6330605 | Hr            | 1.75E-05 | 0.02 | 10.43 | 9.73  | -0.71 | -1.63 |
| 7040598 | Slc5a9        | 1.31E-02 | 0.25 | 8.78  | 8.07  | -0.71 | -1.63 |
| 3710647 | Pdzk1ip1      | 1.92E-03 | 0.13 | 9.96  | 9.25  | -0.71 | -1.63 |
| 3140519 | LOC100046775  | 6.46E-06 | 0.02 | 10.83 | 10.12 | -0.71 | -1.63 |
| 4070398 | EG667063      | 1.30E-02 | 0.25 | 7.21  | 6.50  | -0.71 | -1.63 |
| 1300543 | 4922501C03Rik | 5.96E-04 | 0.09 | 7.77  | 7.05  | -0.71 | -1.64 |
| 1110301 | St3gal5       | 1.03E-02 | 0.23 | 7.70  | 6.99  | -0.71 | -1.64 |
| 4590025 | Habp2         | 6.82E-03 | 0.20 | 6.89  | 6.18  | -0.72 | -1.64 |
| 20181   | 6330408J11Rik | 3.02E-04 | 0.06 | 8.72  | 8.01  | -0.72 | -1.64 |
| 2570139 | Itgb6         | 1.13E-02 | 0.24 | 8.22  | 7.50  | -0.72 | -1.64 |
| 5910068 | Lmo4          | 8.91E-04 | 0.10 | 9.35  | 8.63  | -0.72 | -1.64 |
| 870291  | Fam132a       | 1.88E-02 | 0.29 | 8.82  | 8.09  | -0.72 | -1.65 |
| 2480202 | Prkaa2        | 1.08E-03 | 0.10 | 7.65  | 6.92  | -0.73 | -1.65 |
| 5080746 | Gstm6         | 2.00E-02 | 0.30 | 8.09  | 7.36  | -0.73 | -1.66 |
| 1110035 | Rab3ip        | 1.86E-03 | 0.12 | 8.65  | 7.92  | -0.73 | -1.66 |
| 1110670 | Hist2h2aa2    | 1.82E-03 | 0.12 | 13.41 | 12.67 | -0.73 | -1.66 |
| 7650537 | Ecac2         | 4.40E-03 | 0.17 | 7.05  | 6.32  | -0.73 | -1.66 |

|         |                 |          |      |       |       |       |       |
|---------|-----------------|----------|------|-------|-------|-------|-------|
| 4640209 | Igsf11          | 3.06E-03 | 0.15 | 7.70  | 6.96  | -0.73 | -1.66 |
| 4070279 | Tmprss2         | 6.02E-03 | 0.19 | 13.30 | 12.57 | -0.74 | -1.67 |
| 6550427 | Hpn             | 1.02E-02 | 0.23 | 6.90  | 6.17  | -0.74 | -1.67 |
| 6270327 | Grhl1           | 2.02E-02 | 0.30 | 11.05 | 10.32 | -0.74 | -1.67 |
| 5050523 | B230333C21Rik   | 2.88E-03 | 0.15 | 10.17 | 9.44  | -0.74 | -1.67 |
| 1440600 | Copz2           | 4.27E-03 | 0.17 | 12.31 | 11.57 | -0.74 | -1.67 |
| 1230047 | Gjb2            | 1.41E-02 | 0.26 | 8.29  | 7.55  | -0.74 | -1.67 |
| 150673  | EG381438        | 4.05E-03 | 0.17 | 7.18  | 6.44  | -0.74 | -1.67 |
| 5960554 | Prkaa2          | 1.45E-03 | 0.12 | 8.40  | 7.66  | -0.74 | -1.67 |
| 3190139 | Yeats2          | 9.04E-03 | 0.22 | 8.32  | 7.57  | -0.75 | -1.68 |
| 3450370 | Tuft1           | 5.76E-04 | 0.08 | 12.31 | 11.56 | -0.75 | -1.68 |
| 6200372 | Anxa4           | 3.99E-03 | 0.16 | 12.17 | 11.42 | -0.75 | -1.68 |
| 6330053 | Rab38           | 7.88E-04 | 0.09 | 9.17  | 8.43  | -0.75 | -1.68 |
| 5860100 | 6330534C20Rik   | 3.08E-04 | 0.06 | 8.08  | 7.33  | -0.75 | -1.68 |
| 7050546 | Hist2h2aa1      | 1.66E-03 | 0.12 | 12.97 | 12.22 | -0.75 | -1.68 |
| 1230743 | D630004K10Rik   | 1.05E-02 | 0.23 | 9.68  | 8.93  | -0.75 | -1.68 |
| 630195  | Copz2           | 1.45E-02 | 0.26 | 10.02 | 9.27  | -0.75 | -1.69 |
| 5670564 | Cryl1           | 3.61E-03 | 0.16 | 10.61 | 9.85  | -0.75 | -1.69 |
| 1300220 | Tmprss13        | 1.02E-03 | 0.10 | 10.38 | 9.62  | -0.76 | -1.69 |
| 6420537 | Aebp2           | 2.73E-04 | 0.06 | 7.93  | 7.17  | -0.76 | -1.69 |
| 5390019 | Pla2g4b         | 1.51E-02 | 0.27 | 7.77  | 7.00  | -0.77 | -1.70 |
| 2940541 | Gstm6           | 3.13E-04 | 0.06 | 8.21  | 7.45  | -0.77 | -1.70 |
| 830338  | 4833409J19Rik   | 7.90E-03 | 0.21 | 7.72  | 6.95  | -0.77 | -1.70 |
| 270709  | Irf2            | 6.31E-03 | 0.20 | 12.46 | 11.69 | -0.77 | -1.70 |
| 2760066 | Itgb6           | 1.14E-02 | 0.24 | 9.99  | 9.22  | -0.77 | -1.70 |
| 2450553 | Rshl2a          | 4.76E-04 | 0.08 | 8.17  | 7.40  | -0.77 | -1.71 |
| 1710592 | Rab38           | 9.68E-05 | 0.04 | 8.39  | 7.62  | -0.77 | -1.71 |
| 2690093 | scl0001987.1_16 | 1.57E-02 | 0.27 | 7.68  | 6.90  | -0.77 | -1.71 |
| 1050020 | Cuedc1          | 6.03E-03 | 0.19 | 7.84  | 7.07  | -0.77 | -1.71 |
| 4920056 | Copz2           | 2.03E-02 | 0.30 | 10.71 | 9.93  | -0.79 | -1.72 |
| 20598   | C030014I23Rik   | 7.32E-03 | 0.21 | 7.57  | 6.78  | -0.79 | -1.73 |
| 5130100 | Tubgcp4         | 3.52E-03 | 0.16 | 7.96  | 7.17  | -0.79 | -1.73 |
| 7100255 | Scnn1g          | 5.81E-03 | 0.19 | 7.15  | 6.36  | -0.79 | -1.73 |
| 2850142 | Tia1            | 4.30E-03 | 0.17 | 7.25  | 6.46  | -0.79 | -1.73 |
| 7650020 | 3110021A11Rik   | 2.75E-05 | 0.03 | 7.66  | 6.87  | -0.79 | -1.73 |
| 10176   | Dusp4           | 4.11E-03 | 0.17 | 7.66  | 6.87  | -0.79 | -1.73 |
| 4830674 | Itgb6           | 9.10E-03 | 0.22 | 10.58 | 9.78  | -0.79 | -1.73 |
| 4780164 | Krt23           | 3.59E-03 | 0.16 | 12.82 | 12.02 | -0.80 | -1.74 |
| 1660605 | Sema5a          | 5.23E-03 | 0.18 | 8.51  | 7.71  | -0.80 | -1.74 |
| 50292   | Cobl            | 2.34E-04 | 0.06 | 9.48  | 8.68  | -0.80 | -1.74 |
| 4920300 | Msln            | 1.01E-02 | 0.23 | 8.08  | 7.27  | -0.80 | -1.74 |
| 4070500 | Kel             | 5.71E-03 | 0.19 | 6.87  | 6.06  | -0.80 | -1.75 |
| 5890670 | Sfrs17b         | 2.82E-03 | 0.15 | 10.45 | 9.64  | -0.81 | -1.75 |
| 1580187 | Mat2a           | 4.59E-03 | 0.17 | 14.33 | 13.52 | -0.81 | -1.75 |
| 5270377 | Gstk1           | 8.39E-03 | 0.22 | 11.65 | 10.84 | -0.82 | -1.76 |
| 3990484 | 3110004L20Rik   | 4.54E-04 | 0.07 | 9.16  | 8.34  | -0.82 | -1.76 |
| 1070575 | Copz2           | 9.16E-03 | 0.22 | 12.50 | 11.68 | -0.82 | -1.77 |

|         |                |          |      |       |       |       |       |
|---------|----------------|----------|------|-------|-------|-------|-------|
| 2230730 | Gjb2           | 7.46E-03 | 0.21 | 12.30 | 11.48 | -0.82 | -1.77 |
| 7160482 | D030072B18Rik  | 1.42E-02 | 0.26 | 8.18  | 7.36  | -0.82 | -1.77 |
| 1580445 | Mycl1          | 2.63E-03 | 0.14 | 9.68  | 8.86  | -0.82 | -1.77 |
| 1260543 | Tmem146        | 7.74E-03 | 0.21 | 9.43  | 8.61  | -0.83 | -1.77 |
| 2340445 | C130026I21Rik  | 1.21E-02 | 0.25 | 9.32  | 8.49  | -0.83 | -1.78 |
| 510523  | Zfp612         | 6.18E-05 | 0.04 | 7.82  | 6.99  | -0.83 | -1.78 |
| 4150424 | Pacrg          | 2.27E-04 | 0.06 | 7.17  | 6.34  | -0.83 | -1.78 |
| 6280672 | Neu2           | 9.78E-04 | 0.10 | 8.04  | 7.20  | -0.84 | -1.79 |
| 3800671 | Scin           | 7.43E-03 | 0.21 | 7.93  | 7.09  | -0.84 | -1.79 |
| 450021  | 2210420J11Rik  | 1.87E-02 | 0.29 | 7.52  | 6.68  | -0.84 | -1.79 |
| 6650039 | Jak1           | 2.52E-03 | 0.14 | 8.04  | 7.20  | -0.84 | -1.79 |
| 1110288 | Gnmt           | 8.13E-03 | 0.22 | 7.93  | 7.08  | -0.85 | -1.80 |
| 6550672 | Ptprd          | 4.17E-03 | 0.17 | 8.65  | 7.80  | -0.85 | -1.80 |
| 6280382 | Gjb2           | 9.45E-03 | 0.23 | 11.12 | 10.26 | -0.85 | -1.81 |
| 5910632 | Ppm1k          | 1.07E-04 | 0.05 | 9.65  | 8.80  | -0.86 | -1.81 |
| 2060364 | Tmprss13       | 5.54E-04 | 0.08 | 10.81 | 9.95  | -0.86 | -1.81 |
| 2480730 | Snhg11         | 8.91E-03 | 0.22 | 9.94  | 9.08  | -0.87 | -1.82 |
| 3460064 | Trim2          | 7.53E-05 | 0.04 | 12.44 | 11.57 | -0.87 | -1.83 |
| 3840672 | 2010001P08Rik  | 6.25E-03 | 0.20 | 7.17  | 6.30  | -0.87 | -1.83 |
| 150373  | Tst            | 9.84E-04 | 0.10 | 11.03 | 10.16 | -0.87 | -1.83 |
| 6370164 | Kcnk5          | 2.93E-04 | 0.06 | 8.22  | 7.32  | -0.90 | -1.87 |
| 6900070 | Naip7          | 4.32E-03 | 0.17 | 8.80  | 7.90  | -0.90 | -1.87 |
| 7320437 | Gucy2g         | 1.83E-03 | 0.12 | 7.14  | 6.23  | -0.91 | -1.88 |
| 7650685 | Nfe2l3         | 1.06E-03 | 0.10 | 8.95  | 8.04  | -0.91 | -1.88 |
| 1440020 | Irak4          | 9.02E-03 | 0.22 | 7.92  | 7.01  | -0.92 | -1.89 |
| 4200468 | Nt5c3          | 1.94E-02 | 0.29 | 10.11 | 9.19  | -0.92 | -1.89 |
| 3180468 | Slc27a2        | 2.01E-02 | 0.30 | 7.69  | 6.76  | -0.93 | -1.90 |
| 2940577 | E430002G05Rik  | 2.43E-03 | 0.14 | 9.60  | 8.67  | -0.93 | -1.90 |
| 6220725 | C130026I21Rik  | 8.14E-03 | 0.22 | 9.48  | 8.55  | -0.93 | -1.91 |
| 4220288 | Snhg11         | 4.30E-03 | 0.17 | 10.19 | 9.26  | -0.94 | -1.92 |
| 5890487 | Gstk1          | 3.26E-03 | 0.16 | 11.21 | 10.27 | -0.94 | -1.92 |
| 4590113 | Chst8          | 1.87E-02 | 0.29 | 7.33  | 6.38  | -0.95 | -1.93 |
| 4010491 | Proc           | 1.43E-03 | 0.12 | 7.60  | 6.65  | -0.95 | -1.93 |
| 6840538 | P2rx6          | 3.09E-03 | 0.15 | 7.88  | 6.93  | -0.95 | -1.93 |
| 2350717 | Yeats2         | 2.14E-03 | 0.13 | 10.29 | 9.34  | -0.95 | -1.93 |
| 4640605 | E230002P03Rik  | 9.44E-05 | 0.04 | 8.51  | 7.56  | -0.95 | -1.94 |
| 1780524 | Tfrc           | 1.56E-02 | 0.27 | 10.76 | 9.80  | -0.96 | -1.94 |
| 6520471 | Gstm6          | 1.13E-03 | 0.11 | 7.53  | 6.57  | -0.96 | -1.94 |
| 1450523 | LOC241084      | 7.51E-04 | 0.09 | 7.21  | 6.25  | -0.96 | -1.95 |
| 5960215 | Fer1l4         | 1.72E-02 | 0.28 | 7.87  | 6.90  | -0.97 | -1.95 |
| 7610767 | Tceal5         | 1.08E-02 | 0.24 | 8.07  | 7.10  | -0.97 | -1.96 |
| 6370451 | TMUSG000000166 | 8.42E-03 | 0.22 | 10.18 | 9.20  | -0.98 | -1.97 |
| 1030438 | 9930023K05Rik  | 1.75E-02 | 0.28 | 12.30 | 11.32 | -0.98 | -1.97 |
| 150632  | Havcr1         | 5.38E-03 | 0.18 | 7.31  | 6.32  | -0.99 | -1.99 |
| 3170603 | E430002G05Rik  | 3.32E-03 | 0.16 | 9.14  | 8.15  | -0.99 | -1.99 |
| 2480204 | Nfe2l3         | 1.29E-04 | 0.05 | 9.14  | 8.15  | -1.00 | -2.00 |
| 20092   | Cgn            | 1.15E-06 | 0.01 | 11.30 | 10.30 | -1.00 | -2.00 |

|         |               |          |      |       |       |       |       |
|---------|---------------|----------|------|-------|-------|-------|-------|
| 3710170 | C1qc          | 6.75E-03 | 0.20 | 11.28 | 10.28 | -1.00 | -2.00 |
| 2190131 | Clca4         | 1.87E-03 | 0.12 | 7.24  | 6.24  | -1.00 | -2.00 |
| 4760040 | Habp2         | 1.18E-05 | 0.02 | 7.14  | 6.14  | -1.00 | -2.00 |
| 6330279 | Slc26a4       | 1.97E-02 | 0.30 | 12.46 | 11.44 | -1.02 | -2.02 |
| 5860348 | Fah           | 4.76E-03 | 0.18 | 10.60 | 9.58  | -1.02 | -2.02 |
| 2140220 | Sbp           | 6.63E-04 | 0.09 | 7.00  | 5.99  | -1.02 | -2.02 |
| 620110  | Tfrc          | 2.26E-03 | 0.13 | 11.00 | 9.98  | -1.02 | -2.02 |
| 20440   | 2810423A18Rik | 3.43E-03 | 0.16 | 13.40 | 12.38 | -1.02 | -2.03 |
| 290703  | AB112350      | 7.08E-04 | 0.09 | 8.51  | 7.49  | -1.03 | -2.04 |
| 670201  | Csta          | 7.57E-03 | 0.21 | 7.22  | 6.19  | -1.03 | -2.04 |
| 5290131 | Rxrg          | 1.12E-04 | 0.05 | 8.07  | 7.04  | -1.03 | -2.04 |
| 2100768 | Hs3st6        | 2.27E-03 | 0.13 | 7.23  | 6.20  | -1.03 | -2.05 |
| 5340138 | Fgf13         | 9.58E-04 | 0.10 | 8.92  | 7.89  | -1.03 | -2.05 |
| 5810470 | Aldh1a1       | 2.00E-02 | 0.30 | 10.43 | 9.39  | -1.03 | -2.05 |
| 5910603 | LOC674427     | 2.16E-05 | 0.03 | 7.37  | 6.33  | -1.04 | -2.06 |
| 3140427 | Ephb6         | 2.92E-03 | 0.15 | 7.68  | 6.62  | -1.06 | -2.08 |
| 1410224 | Cyp2b23       | 2.21E-03 | 0.13 | 7.49  | 6.43  | -1.06 | -2.08 |
| 5290711 | Car2          | 1.38E-02 | 0.26 | 10.72 | 9.66  | -1.06 | -2.09 |
| 2100286 | Golm1         | 5.42E-03 | 0.18 | 11.01 | 9.95  | -1.06 | -2.09 |
| 6420671 | Frag1         | 1.01E-02 | 0.23 | 13.12 | 12.06 | -1.07 | -2.09 |
| 5090440 | Prdx6         | 5.05E-05 | 0.04 | 7.91  | 6.84  | -1.07 | -2.10 |
| 4250689 | Ccrn4l        | 3.78E-05 | 0.03 | 9.52  | 8.44  | -1.07 | -2.10 |
| 1260047 | Muc1          | 3.88E-04 | 0.07 | 7.75  | 6.68  | -1.07 | -2.11 |
| 780180  | Aspa          | 2.67E-04 | 0.06 | 8.45  | 7.37  | -1.08 | -2.12 |
| 6270181 | Dusp4         | 4.95E-03 | 0.18 | 9.30  | 8.21  | -1.09 | -2.13 |
| 6860273 | Alg9          | 4.00E-05 | 0.03 | 8.22  | 7.13  | -1.10 | -2.14 |
| 5260482 | Wnt4          | 3.24E-03 | 0.15 | 8.46  | 7.35  | -1.11 | -2.16 |
| 1580358 | Larp2         | 1.36E-03 | 0.11 | 7.45  | 6.33  | -1.11 | -2.17 |
| 3610528 | LOC331239     | 6.96E-04 | 0.09 | 8.96  | 7.85  | -1.12 | -2.17 |
| 3460333 | Golm1         | 9.62E-04 | 0.10 | 11.74 | 10.62 | -1.12 | -2.18 |
| 3890608 | LOC677375     | 6.41E-05 | 0.04 | 7.93  | 6.81  | -1.12 | -2.18 |
| 130519  | LOC100047261  | 2.04E-05 | 0.02 | 13.75 | 12.62 | -1.13 | -2.19 |
| 5690358 | Mapk11        | 8.69E-05 | 0.04 | 9.33  | 8.20  | -1.13 | -2.19 |
| 70035   | D530004J12Rik | 2.82E-04 | 0.06 | 7.91  | 6.77  | -1.14 | -2.20 |
| 3420079 | Muc1          | 7.43E-04 | 0.09 | 8.43  | 7.29  | -1.14 | -2.20 |
| 2470438 | Acrbp         | 2.07E-03 | 0.13 | 7.62  | 6.47  | -1.14 | -2.21 |
| 6290400 | AU042651      | 5.88E-03 | 0.19 | 8.12  | 6.97  | -1.15 | -2.22 |
| 1190735 | Napepld       | 1.26E-03 | 0.11 | 8.42  | 7.26  | -1.15 | -2.23 |
| 3140349 | Zfp36l1       | 4.66E-05 | 0.03 | 12.85 | 11.70 | -1.15 | -2.23 |
| 6620519 | Fzd5          | 3.18E-05 | 0.03 | 10.71 | 9.55  | -1.15 | -2.23 |
| 5260538 | Lrrc52        | 2.06E-03 | 0.13 | 8.02  | 6.85  | -1.17 | -2.24 |
| 5690129 | 1700124P09Rik | 3.93E-05 | 0.03 | 7.31  | 6.14  | -1.17 | -2.24 |
| 2260201 | Ckmt1         | 1.96E-04 | 0.05 | 8.24  | 7.07  | -1.17 | -2.25 |
| 5290017 | Casp4         | 4.58E-03 | 0.17 | 9.59  | 8.41  | -1.18 | -2.26 |
| 2490672 | Cbr2          | 2.74E-04 | 0.06 | 14.41 | 13.23 | -1.18 | -2.27 |
| 430349  | Ube2i         | 1.17E-04 | 0.05 | 7.22  | 6.01  | -1.21 | -2.31 |
| 6370709 | Atp6v1c2      | 4.49E-03 | 0.17 | 7.84  | 6.63  | -1.21 | -2.32 |

|         |               |          |      |       |       |       |       |
|---------|---------------|----------|------|-------|-------|-------|-------|
| 150176  | Tmem139       | 3.70E-04 | 0.07 | 9.23  | 8.02  | -1.22 | -2.33 |
| 4540717 | Epb4.1l4b     | 1.04E-04 | 0.04 | 10.55 | 9.33  | -1.22 | -2.34 |
| 3130523 | Rasgrf1       | 2.63E-05 | 0.03 | 7.34  | 6.11  | -1.23 | -2.35 |
| 4280110 | Nudt6         | 1.99E-02 | 0.30 | 8.83  | 7.59  | -1.23 | -2.35 |
| 6380128 | Hist1h2be     | 4.62E-03 | 0.17 | 9.38  | 8.14  | -1.24 | -2.36 |
| 770451  | Rasgrf1       | 6.67E-05 | 0.04 | 7.52  | 6.28  | -1.24 | -2.36 |
| 6560093 | Sprr1a        | 6.38E-04 | 0.09 | 9.81  | 8.57  | -1.24 | -2.37 |
| 4860482 | LOC100046087  | 1.88E-02 | 0.29 | 8.40  | 7.15  | -1.25 | -2.38 |
| 2900431 | Slc9a2        | 6.90E-03 | 0.20 | 11.19 | 9.91  | -1.28 | -2.43 |
| 2000706 | B230213E18Rik | 4.41E-05 | 0.03 | 7.38  | 6.10  | -1.28 | -2.43 |
| 4610674 | Ckmt1         | 9.18E-04 | 0.10 | 11.59 | 10.30 | -1.29 | -2.44 |
| 6520392 | Csprs         | 7.63E-03 | 0.21 | 10.13 | 8.84  | -1.29 | -2.44 |
| 620195  | Rad51l1       | 9.17E-03 | 0.22 | 8.30  | 7.00  | -1.30 | -2.46 |
| 4230167 | Asxl3         | 1.92E-05 | 0.02 | 7.73  | 6.41  | -1.32 | -2.49 |
| 4200546 | Adcy8         | 1.32E-04 | 0.05 | 7.87  | 6.54  | -1.32 | -2.50 |
| 1770324 | Wnt4          | 6.31E-04 | 0.09 | 9.40  | 8.08  | -1.32 | -2.50 |
| 3170270 | Acsm3         | 1.30E-03 | 0.11 | 8.32  | 6.99  | -1.32 | -2.51 |
| 2340056 | Cldn10        | 5.72E-03 | 0.19 | 12.87 | 11.53 | -1.33 | -2.52 |
| 1450195 | Acsm3         | 1.48E-03 | 0.12 | 8.37  | 7.03  | -1.33 | -2.52 |
| 4560133 | Prss32        | 1.86E-03 | 0.12 | 8.01  | 6.64  | -1.36 | -2.57 |
| 6760209 | Rab26         | 2.37E-03 | 0.14 | 8.36  | 6.99  | -1.37 | -2.58 |
| 240438  | Krt8          | 2.85E-05 | 0.03 | 14.21 | 12.83 | -1.37 | -2.59 |
| 4570463 | Kcnk5         | 5.41E-05 | 0.04 | 10.51 | 9.12  | -1.38 | -2.61 |
| 6040717 | Rnf186        | 5.27E-03 | 0.18 | 9.99  | 8.60  | -1.39 | -2.62 |
| 4730678 | Gucy2g        | 3.11E-03 | 0.15 | 9.71  | 8.31  | -1.40 | -2.64 |
| 3370397 | Barx2         | 2.74E-04 | 0.06 | 9.49  | 8.09  | -1.40 | -2.65 |
| 1570026 | Epb4.1l4b     | 5.19E-05 | 0.04 | 10.89 | 9.48  | -1.40 | -2.65 |
| 3460102 | Apol7a        | 2.63E-03 | 0.14 | 9.87  | 8.46  | -1.41 | -2.65 |
| 5360358 | 1110017F19Rik | 1.11E-03 | 0.11 | 8.30  | 6.89  | -1.41 | -2.66 |
| 940370  | Dnase1l2      | 6.82E-05 | 0.04 | 8.33  | 6.92  | -1.41 | -2.66 |
| 7100446 | Tia1          | 1.12E-02 | 0.24 | 9.42  | 8.01  | -1.42 | -2.67 |
| 7570132 | LOC100044314  | 1.52E-02 | 0.27 | 7.99  | 6.57  | -1.42 | -2.67 |
| 2480646 | Arl14         | 1.63E-03 | 0.12 | 8.07  | 6.64  | -1.43 | -2.70 |
| 2480241 | Muc1          | 1.32E-04 | 0.05 | 8.52  | 7.08  | -1.44 | -2.71 |
| 6040689 | Cyp2f2        | 4.93E-03 | 0.18 | 13.12 | 11.68 | -1.45 | -2.72 |
| 4230358 | Ugt2b34       | 3.59E-03 | 0.16 | 8.07  | 6.62  | -1.45 | -2.74 |
| 4730202 | 2310007B03Rik | 1.32E-03 | 0.11 | 8.36  | 6.90  | -1.46 | -2.75 |
| 6220128 | Igfals        | 1.94E-04 | 0.05 | 8.04  | 6.58  | -1.46 | -2.75 |
| 6660296 | Sectm1b       | 1.58E-04 | 0.05 | 10.50 | 9.04  | -1.46 | -2.76 |
| 1440482 | Uts2r         | 1.55E-04 | 0.05 | 7.42  | 5.95  | -1.47 | -2.77 |
| 5810608 | Arl14         | 1.01E-03 | 0.10 | 8.11  | 6.60  | -1.51 | -2.85 |
| 6270553 | Muc1          | 3.04E-04 | 0.06 | 9.03  | 7.47  | -1.55 | -2.93 |
| 7550433 | Eme2          | 5.99E-06 | 0.02 | 7.60  | 6.03  | -1.57 | -2.96 |
| 7100367 | 1700124P09Rik | 1.74E-04 | 0.05 | 7.75  | 6.14  | -1.61 | -3.05 |
| 3130288 | Aldh1a7       | 6.50E-04 | 0.09 | 9.78  | 8.13  | -1.66 | -3.16 |
| 1340196 | Psapl1        | 4.19E-03 | 0.17 | 9.09  | 7.36  | -1.73 | -3.31 |
| 580332  | C1qb          | 4.06E-04 | 0.07 | 11.58 | 9.83  | -1.75 | -3.37 |

|         |               |          |      |       |       |       |        |
|---------|---------------|----------|------|-------|-------|-------|--------|
| 6940762 | Atp6v1c2      | 3.65E-03 | 0.16 | 8.87  | 7.10  | -1.77 | -3.40  |
| 6560445 | Hgfac         | 1.48E-03 | 0.12 | 9.21  | 7.43  | -1.77 | -3.42  |
| 2690026 | Trpv6         | 1.54E-04 | 0.05 | 8.38  | 6.60  | -1.78 | -3.44  |
| 650228  | Lrrc52        | 1.90E-03 | 0.13 | 9.08  | 7.21  | -1.88 | -3.67  |
| 150601  | Slc9a2        | 1.02E-04 | 0.04 | 11.04 | 9.07  | -1.97 | -3.91  |
| 5080010 | Trpv6         | 2.47E-04 | 0.06 | 9.11  | 7.13  | -1.98 | -3.95  |
| 2140221 | Slc40a1       | 4.28E-04 | 0.07 | 12.31 | 10.32 | -1.99 | -3.97  |
| 1440040 | Garnl4        | 3.04E-06 | 0.02 | 11.26 | 9.26  | -2.00 | -4.00  |
| 2100386 | Ndufb10       | 5.44E-07 | 0.00 | 9.51  | 7.40  | -2.11 | -4.33  |
| 1660414 | AI987692      | 1.30E-02 | 0.25 | 10.74 | 8.63  | -2.12 | -4.33  |
| 4210475 | Gsdmc3        | 9.26E-03 | 0.22 | 10.30 | 8.19  | -2.12 | -4.34  |
| 3850639 | Treh          | 2.51E-05 | 0.03 | 8.91  | 6.78  | -2.13 | -4.39  |
| 6980050 | LOC100045250  | 1.75E-02 | 0.28 | 11.36 | 9.20  | -2.16 | -4.48  |
| 460682  | 2200001I15Rik | 1.04E-04 | 0.04 | 11.22 | 9.05  | -2.17 | -4.49  |
| 3370373 | AI987692      | 1.83E-02 | 0.29 | 11.76 | 9.58  | -2.18 | -4.52  |
| 1230044 | LOC100047816  | 4.82E-05 | 0.03 | 8.28  | 6.08  | -2.21 | -4.62  |
| 2340167 | Rdm1          | 7.41E-08 | 0.00 | 9.67  | 7.46  | -2.21 | -4.64  |
| 1500082 | LOC100045250  | 2.00E-02 | 0.30 | 10.92 | 8.70  | -2.23 | -4.68  |
| 5870021 | Xlr4a         | 9.39E-04 | 0.10 | 11.24 | 9.00  | -2.24 | -4.72  |
| 2100608 | Cyp2b10       | 1.32E-03 | 0.11 | 9.57  | 7.31  | -2.26 | -4.80  |
| 6270465 | Rasgrf1       | 1.63E-05 | 0.02 | 8.97  | 6.67  | -2.30 | -4.92  |
| 1300092 | 1600029D21Rik | 3.77E-03 | 0.16 | 9.12  | 6.81  | -2.30 | -4.93  |
| 5870520 | Gsdmc3        | 1.49E-02 | 0.27 | 11.72 | 9.41  | -2.32 | -4.98  |
| 2320017 | Acrbp         | 2.54E-03 | 0.14 | 10.29 | 7.86  | -2.43 | -5.40  |
| 7040170 | Ubd           | 9.19E-04 | 0.10 | 11.91 | 9.41  | -2.49 | -5.63  |
| 580746  | Rasgrf1       | 1.14E-05 | 0.02 | 9.21  | 6.67  | -2.54 | -5.82  |
| 2470554 | Clec2e        | 2.97E-04 | 0.06 | 9.72  | 6.96  | -2.76 | -6.77  |
| 2630689 | Crabp1        | 3.59E-04 | 0.07 | 9.72  | 6.96  | -2.76 | -6.79  |
| 1010168 | Dnase1l2      | 7.96E-06 | 0.02 | 9.32  | 6.53  | -2.79 | -6.93  |
| 3060468 | A830030H10Rik | 4.11E-03 | 0.17 | 10.09 | 7.29  | -2.80 | -6.98  |
| 1440382 | LOC633661     | 4.21E-03 | 0.17 | 8.89  | 6.03  | -2.85 | -7.22  |
| 1580377 | Sult1c2       | 1.70E-03 | 0.12 | 9.87  | 6.96  | -2.91 | -7.49  |
| 7550110 | LOC100047816  | 5.48E-07 | 0.00 | 9.68  | 6.76  | -2.92 | -7.59  |
| 3520129 | Mug1          | 1.15E-04 | 0.05 | 9.56  | 6.30  | -3.26 | -9.57  |
| 2510110 | EG640530      | 1.71E-04 | 0.05 | 11.05 | 6.74  | -4.31 | -19.82 |
| 5870010 | Mug4          | 5.13E-04 | 0.08 | 12.14 | 7.22  | -4.92 | -30.27 |

**Supplementary Table 5: GSEA of *ERG* profile in *Pten* loss prostates**

| NAME                               | SIZE       | ES          | NES         | NOM p-val    | FDR q-val    | RANK AT MAX |
|------------------------------------|------------|-------------|-------------|--------------|--------------|-------------|
| MEL18_DN.V1_UP                     | 123        | 0.65        | 2.28        | 0.000        | 0.000        | 3693        |
| ALK_DN.V1_UP                       | 106        | 0.62        | 2.11        | 0.000        | 0.000        | 4161        |
| RPS14_DN.V1_UP                     | 159        | 0.58        | 2.09        | 0.000        | 0.000        | 4054        |
| BMI1_DN.V1_UP                      | 134        | 0.59        | 2.08        | 0.000        | 0.000        | 4634        |
| E2F1_UP.V1_DN                      | 169        | 0.56        | 2.07        | 0.000        | 0.000        | 2073        |
| KRAS.600.LUNG.BREAST_UP.V1_UP      | 213        | 0.56        | 2.06        | 0.000        | 0.000        | 4020        |
| ESC_V6.5_UP_EARLY.V1_DN            | 156        | 0.58        | 2.06        | 0.000        | 0.000        | 3215        |
| MEK_UP.V1_UP                       | 170        | 0.57        | 2.03        | 0.000        | 0.000        | 3115        |
| IL15_UP.V1_UP                      | 146        | 0.56        | 2.01        | 0.000        | 0.000        | 3679        |
| BMI1_DN_MEL18_DN.V1_UP             | 122        | 0.57        | 2.01        | 0.000        | 0.000        | 3913        |
| SNF5_DN.V1_UP                      | 158        | 0.56        | 2.00        | 0.000        | 0.000        | 4747        |
| KRAS.600_UP.V1_UP                  | 225        | 0.54        | 1.98        | 0.000        | 0.000        | 4066        |
| KRAS.KIDNEY_UP.V1_DN               | 110        | 0.57        | 1.97        | 0.000        | 0.000        | 3210        |
| HINATA_NFKB_IMMUNO_INF             | 15         | 0.82        | 1.97        | 0.000        | 0.000        | 731         |
| CAHOY_ASTROGLIAL                   | 92         | 0.58        | 1.97        | 0.000        | 0.000        | 3952        |
| CORDENONSI_YAP_CONSERVED_SIGNATURE | 55         | 0.63        | 1.96        | 0.000        | 0.000        | 5285        |
| EGFR_UP.V1_UP                      | 164        | 0.54        | 1.95        | 0.000        | 0.000        | 2797        |
| HOXA9_DN.V1_DN                     | 156        | 0.54        | 1.94        | 0.000        | 0.000        | 3895        |
| KRAS.LUNG.BREAST_UP.V1_UP          | 112        | 0.56        | 1.92        | 0.000        | 0.000        | 2464        |
| KRAS.DF.V1_UP                      | 166        | 0.53        | 1.92        | 0.000        | 0.000        | 4021        |
| ERB2_UP.V1_UP                      | 165        | 0.53        | 1.91        | 0.000        | 0.001        | 3124        |
| ATF2_UP.V1_DN                      | 156        | 0.53        | 1.91        | 0.000        | 0.001        | 4103        |
| CSR_EARLY_UP.V1_UP                 | 141        | 0.53        | 1.90        | 0.000        | 0.001        | 7063        |
| CSR_LATE_UP.V1_DN                  | 126        | 0.54        | 1.90        | 0.000        | 0.001        | 3511        |
| TGFB_UP.V1_UP                      | 160        | 0.52        | 1.87        | 0.000        | 0.001        | 4516        |
| PKCA_DN.V1_DN                      | 143        | 0.52        | 1.86        | 0.000        | 0.001        | 4391        |
| IL15_UP.V1_DN                      | 143        | 0.52        | 1.85        | 0.000        | 0.001        | 4191        |
| KRAS.LUNG_UP.V1_UP                 | 101        | 0.55        | 1.85        | 0.000        | 0.001        | 3691        |
| HOXA9_DN.V1_UP                     | 154        | 0.51        | 1.84        | 0.000        | 0.001        | 4103        |
| <b>VCAP-ANDROGEN-UP</b>            | <b>396</b> | <b>0.47</b> | <b>1.84</b> | <b>0.000</b> | <b>0.001</b> | <b>2308</b> |
| RELA_DN.V1_UP                      | 125        | 0.53        | 1.84        | 0.000        | 0.001        | 5291        |
| BMI1_DN_MEL18_DN.V1_DN             | 120        | 0.53        | 1.83        | 0.000        | 0.001        | 3204        |
| ATF2_S_UP.V1_DN                    | 154        | 0.52        | 1.83        | 0.000        | 0.001        | 5468        |
| P53_DN.V1_DN                       | 167        | 0.51        | 1.83        | 0.000        | 0.001        | 3082        |
| STK33_NOMO_UP                      | 238        | 0.49        | 1.83        | 0.000        | 0.001        | 3583        |
| IL2_UP.V1_UP                       | 149        | 0.51        | 1.82        | 0.000        | 0.001        | 4586        |
| SNF5_DN.V1_DN                      | 146        | 0.51        | 1.80        | 0.000        | 0.002        | 3169        |
| PRC2_EZH2_UP.V1_DN                 | 164        | 0.50        | 1.80        | 0.000        | 0.002        | 5052        |
| GCNP_SHH_UP_EARLY.V1_DN            | 148        | 0.51        | 1.80        | 0.000        | 0.002        | 3821        |
| WNT_UP.V1_DN                       | 154        | 0.50        | 1.79        | 0.000        | 0.002        | 4394        |
| LEF1_UP.V1_UP                      | 166        | 0.49        | 1.78        | 0.000        | 0.002        | 4698        |
| ESC_J1_UP_LATE.V1_UP               | 170        | 0.50        | 1.78        | 0.000        | 0.002        | 2025        |
| ESC_V6.5_UP_LATE.V1_DN             | 155        | 0.50        | 1.78        | 0.001        | 0.002        | 5200        |
| CAMP_UP.V1_DN                      | 163        | 0.50        | 1.78        | 0.000        | 0.002        | 6311        |
| STK33_UP                           | 229        | 0.47        | 1.77        | 0.000        | 0.002        | 4935        |
| RAPA_EARLY_UP.V1_UP                | 150        | 0.50        | 1.77        | 0.000        | 0.002        | 4379        |



|                                    |            |             |             |              |              |             |
|------------------------------------|------------|-------------|-------------|--------------|--------------|-------------|
| KRAS.BREAST_UP.V1_UP               | 111        | 0.51        | 1.77        | 0.000        | 0.003        | 1170        |
| KRAS.300_UP.V1_UP                  | 114        | 0.51        | 1.76        | 0.000        | 0.003        | 5039        |
| EIF4E_DN                           | 79         | 0.53        | 1.76        | 0.000        | 0.003        | 2704        |
| RB_DN.V1_DN                        | 111        | 0.51        | 1.75        | 0.000        | 0.003        | 4532        |
| CRX_DN.V1_DN                       | 123        | 0.50        | 1.74        | 0.000        | 0.003        | 4244        |
| AKT_UP_MTOR_DN.V1_DN               | 166        | 0.48        | 1.74        | 0.000        | 0.004        | 4733        |
| HIMYC-P05-UP2-FOLD                 | 409        | 0.44        | 1.72        | 0.000        | 0.004        | 4308        |
| MYC_UP.V1_DN                       | 117        | 0.50        | 1.71        | 0.002        | 0.004        | 3377        |
| JNK_DN.V1_DN                       | 157        | 0.48        | 1.71        | 0.001        | 0.005        | 5358        |
| RB_P130_DN.V1_UP                   | 109        | 0.50        | 1.71        | 0.004        | 0.004        | 7279        |
| RAF_UP.V1_UP                       | 175        | 0.47        | 1.70        | 0.000        | 0.005        | 4517        |
| RELA_DN.V1_DN                      | 123        | 0.49        | 1.70        | 0.000        | 0.005        | 2654        |
| CYCLIN_D1_KE_.V1_DN                | 164        | 0.46        | 1.68        | 0.000        | 0.006        | 3159        |
| STK33_SKM_UP                       | 205        | 0.46        | 1.68        | 0.000        | 0.006        | 4804        |
| TBK1.DF_UP                         | 244        | 0.45        | 1.68        | 0.002        | 0.006        | 4325        |
| YAP1_UP                            | 29         | 0.61        | 1.65        | 0.013        | 0.007        | 5365        |
| MEL18_DN.V1_DN                     | 122        | 0.47        | 1.64        | 0.004        | 0.009        | 5171        |
| IL21_UP.V1_UP                      | 160        | 0.46        | 1.63        | 0.000        | 0.009        | 3574        |
| PRC2_SUZ12_UP.V1_DN                | 144        | 0.46        | 1.63        | 0.001        | 0.009        | 4701        |
| LTE2_UP.V1_UP                      | 163        | 0.46        | 1.63        | 0.000        | 0.010        | 2065        |
| CAHOY_OLIGODENDROCUTIC             | 81         | 0.49        | 1.63        | 0.004        | 0.010        | 2873        |
| RB_P130_DN.V1_DN                   | 112        | 0.46        | 1.62        | 0.002        | 0.011        | 2391        |
| <b>VCAP-ERGS1-DN-2FOLD-TOMLINS</b> | <b>119</b> | <b>0.47</b> | <b>1.61</b> | <b>0.001</b> | <b>0.011</b> | <b>5278</b> |
| STK33_SKM_DN                       | 201        | 0.44        | 1.60        | 0.000        | 0.012        | 5254        |
| AKT_UP_MTOR_DN.V1_UP               | 160        | 0.45        | 1.60        | 0.001        | 0.012        | 2215        |
| PTEN_DN.V1_DN                      | 134        | 0.45        | 1.59        | 0.005        | 0.014        | 4659        |
| P53_DN.V2_UP                       | 117        | 0.46        | 1.58        | 0.004        | 0.015        | 4018        |
| KRAS.50_UP.V1_UP                   | 38         | 0.54        | 1.58        | 0.014        | 0.015        | 3977        |
| AKT_UP.V1_DN                       | 172        | 0.44        | 1.58        | 0.002        | 0.015        | 3834        |
| PTEN_DN.V2_UP                      | 105        | 0.46        | 1.58        | 0.008        | 0.015        | 4216        |
| MTOR_UP.V1_UP                      | 145        | 0.44        | 1.57        | 0.002        | 0.015        | 4064        |
| BCAT.100_UP.V1_UP                  | 43         | 0.52        | 1.56        | 0.021        | 0.016        | 3630        |
| ESC_J1_UP_LATE.V1_DN               | 162        | 0.44        | 1.56        | 0.001        | 0.016        | 7829        |
| PRC2_SUZ12_UP.V1_UP                | 142        | 0.44        | 1.56        | 0.005        | 0.016        | 4582        |
| TBK1.DN.48HRS_UP                   | 44         | 0.52        | 1.56        | 0.018        | 0.017        | 4989        |
| NOTCH_DN.V1_DN                     | 143        | 0.43        | 1.56        | 0.002        | 0.017        | 3085        |
| E2F3_UP.V1_DN                      | 97         | 0.46        | 1.55        | 0.009        | 0.018        | 5766        |
| PIGF_UP.V1_UP                      | 160        | 0.43        | 1.54        | 0.007        | 0.019        | 5354        |
| CYCLIN_D1_UP.V1_UP                 | 161        | 0.43        | 1.54        | 0.001        | 0.020        | 6437        |
| ESC_J1_UP_EARLY.V1_DN              | 157        | 0.42        | 1.53        | 0.010        | 0.021        | 4477        |
| ATM_DN.V1_UP                       | 117        | 0.44        | 1.53        | 0.007        | 0.021        | 6326        |
| VEGF_A_UP.V1_DN                    | 167        | 0.42        | 1.52        | 0.005        | 0.023        | 5658        |
| SRC_UP.V1_DN                       | 122        | 0.43        | 1.51        | 0.011        | 0.025        | 4455        |
| PRC2_EDD_UP.V1_UP                  | 167        | 0.42        | 1.51        | 0.008        | 0.026        | 7529        |
| CSR_LATE_UP.V1_UP                  | 142        | 0.42        | 1.50        | 0.008        | 0.028        | 5657        |
| BMI1_DN.V1_DN                      | 120        | 0.43        | 1.50        | 0.011        | 0.028        | 3420        |
| CYCLIN_D1_UP.V1_DN                 | 166        | 0.41        | 1.50        | 0.006        | 0.028        | 5041        |
| AKT_UP.V1_UP                       | 148        | 0.41        | 1.49        | 0.007        | 0.030        | 1543        |

|                            |            |             |             |              |              |             |
|----------------------------|------------|-------------|-------------|--------------|--------------|-------------|
| <b>CARVER_CASTRATE_OWN</b> | <b>242</b> | <b>0.40</b> | <b>1.49</b> | <b>0.006</b> | <b>0.030</b> | <b>2848</b> |
| NRL_DN.V1_DN               | 117        | 0.43        | 1.48        | 0.016        | 0.031        | 4380        |
| KRAS.KIDNEY_UP.V1_UP       | 120        | 0.43        | 1.48        | 0.011        | 0.031        | 4192        |
| PDGF_UP.V1_UP              | 115        | 0.43        | 1.47        | 0.020        | 0.033        | 4920        |
| ESC_V6.5_UP_LATE.V1_UP     | 163        | 0.41        | 1.47        | 0.008        | 0.033        | 5018        |
| IL2_UP.V1_DN               | 149        | 0.41        | 1.46        | 0.009        | 0.035        | 4200        |
| STK33_DN                   | 210        | 0.39        | 1.46        | 0.004        | 0.035        | 4983        |
| P53_DN.V2_DN               | 130        | 0.41        | 1.44        | 0.011        | 0.041        | 4604        |
| BRCA1_DN.V1_UP             | 102        | 0.42        | 1.43        | 0.033        | 0.045        | 7529        |
| WNT_UP.V1_UP               | 160        | 0.40        | 1.43        | 0.012        | 0.045        | 2322        |
| P53_DN.V1_UP               | 163        | 0.39        | 1.43        | 0.018        | 0.045        | 4479        |
| PTEN_DN.V1_UP              | 146        | 0.40        | 1.43        | 0.020        | 0.046        | 3761        |
| CAMP_UP.V1_UP              | 165        | 0.40        | 1.43        | 0.023        | 0.046        | 5873        |
| STK33_NOMO_DN              | 203        | 0.39        | 1.42        | 0.010        | 0.047        | 4073        |
| CYCLIN_D1_KE_.V1_UP        | 165        | 0.40        | 1.42        | 0.014        | 0.048        | 6389        |
| SIRNA_EIF4GI_UP            | 81         | 0.43        | 1.41        | 0.043        | 0.052        | 4343        |
| JNK_DN.V1_UP               | 149        | 0.40        | 1.41        | 0.018        | 0.054        | 7723        |
| PRC1_BMI_UP.V1_DN          | 138        | 0.40        | 1.40        | 0.031        | 0.057        | 4204        |
| CAHOY_ASTROCYTIC           | 94         | 0.41        | 1.40        | 0.046        | 0.057        | 5903        |
| CRX_NRL_DN.V1_UP           | 122        | 0.41        | 1.40        | 0.034        | 0.058        | 2293        |
| PRC2_EZH2_UP.V1_UP         | 153        | 0.39        | 1.40        | 0.035        | 0.058        | 6839        |
| MTOR_UP.N4.V1_UP           | 175        | 0.38        | 1.39        | 0.030        | 0.062        | 5658        |
| KRAS.PROSTATE_UP.V1_UP     | 114        | 0.40        | 1.38        | 0.044        | 0.068        | 3977        |
| ESC_J1_UP_EARLY.V1_UP      | 152        | 0.38        | 1.37        | 0.040        | 0.068        | 4136        |
| CRX_NRL_DN.V1_DN           | 109        | 0.40        | 1.36        | 0.049        | 0.073        | 4380        |
| RB_DN.V1_UP                | 120        | 0.39        | 1.36        | 0.053        | 0.076        | 5825        |
| PDGF_ERK_DN.V1_UP          | 119        | 0.39        | 1.36        | 0.044        | 0.076        | 4659        |
| MTOR_UP.V1_DN              | 164        | 0.38        | 1.36        | 0.033        | 0.077        | 4993        |
| PRC2_EDD_UP.V1_DN          | 158        | 0.37        | 1.35        | 0.050        | 0.082        | 4191        |
| CAHOY_NEURONAL             | 88         | 0.41        | 1.34        | 0.082        | 0.088        | 3606        |
| IL21_UP.V1_DN              | 136        | 0.38        | 1.34        | 0.063        | 0.089        | 3239        |
| TBK1.DF_DN                 | 246        | 0.35        | 1.32        | 0.027        | 0.097        | 5761        |

**Supplementary Table 6: DAVID Gene Ontology Analysis**

| PTEN Loss Down, ERG Down |                                                                                                                         |       |         |                                                                                           |  |
|--------------------------|-------------------------------------------------------------------------------------------------------------------------|-------|---------|-------------------------------------------------------------------------------------------|--|
| Category                 | Term                                                                                                                    | Count | P-Value | Genes                                                                                     |  |
| GOTERM_BP_FAT            | GO:0006811~ion transport                                                                                                | 6     | 0.0102  | TST, SLC11A2, ATP6V1C2, BHLHA15, FKBP4, SLC01A5                                           |  |
| UP_SEQ_FEATURE           | binding site:Substrate                                                                                                  | 4     | 0.0144  | TST, GNMT, HPGD, NEU2                                                                     |  |
| GOTERM_CC_FAT            | GO:0005764~lysosome                                                                                                     | 3     | 0.0324  | SLC11A2, PRDX6, CTNS                                                                      |  |
| GOTERM_CC_FAT            | GO:0000323~lytic vacuole                                                                                                | 3     | 0.0327  | SLC11A2, PRDX6, CTNS                                                                      |  |
| UP_SEQ_FEATURE           | DNA-binding region:Basic motif                                                                                          | 3     | 0.0335  | MYCL1, BHLHA15, DBP                                                                       |  |
| SP_PIR_KEYWORDS          | hydrolase                                                                                                               | 7     | 0.0360  | PTPRD, PPM1K, PRDX6, EME2, MMP7, MME, NEU2                                                |  |
| GOTERM_CC_FAT            | GO:0005773~vacuole                                                                                                      | 3     | 0.0415  | SLC11A2, PRDX6, CTNS                                                                      |  |
| SP_PIR_KEYWORDS          | transport                                                                                                               | 7     | 0.0437  | COPZ2, SLC11A2, ATP6V1C2, NDUFB10, RAB26, CTNS, SLC01A5                                   |  |
| PTEN Loss Down, ERG Up   |                                                                                                                         |       |         |                                                                                           |  |
| Category                 | Term                                                                                                                    | Count | P-Value | Genes                                                                                     |  |
| SP_PIR_KEYWORDS          | endoplasmic reticulum                                                                                                   | 11    | 0.0002  | HYOU1, P4HA2, ERN1, PDIA6, ASPH, ACSL4, TMED9, AGR2, SEC63, ITPR2, MEST                   |  |
| INTERPRO                 | IPR012335:Thioredoxin fold                                                                                              | 5     | 0.0006  | NXNL2, GPX3, PDIA6, AGR2, GLRX                                                            |  |
| GOTERM_CC_FAT            | GO:0005783~endoplasmic reticulum                                                                                        | 11    | 0.0009  | HYOU1, P4HA2, UPK1A, ERN1, PDIA6, ASPH, ACSL4, TMED9, AGR2, SEC63, ITPR2                  |  |
| SP_PIR_KEYWORDS          | signal                                                                                                                  | 22    | 0.0018  | IL1R2, EMCN, MSMB, PDIA6, TINAGL1, TMED9, HYOU1, UNC5B, P4HA2, GPR110, H2-BL, GPX3, ERN1, |  |
| GOTERM_BP_FAT            | GO:0006094~gluconeogenesis                                                                                              | 3     | 0.0023  | ATF4, FBP1, FBP3                                                                          |  |
| GOTERM_BP_FAT            | GO:0019319~hexose biosynthetic process                                                                                  | 3     | 0.0036  | ATF4, FBP1, FBP3                                                                          |  |
| GOTERM_BP_FAT            | GO:0006090~pyruvate metabolic process                                                                                   | 3     | 0.0036  | ATF4, FBP1, FBP3                                                                          |  |
| GOTERM_MF_FAT            | GO:0016891~endoribonuclease activity, producing 5'-phosphomonoesters                                                    | 3     | 0.0044  | MELA, ERN1, LOC280487                                                                     |  |
| UP_SEQ_FEATURE           | signal peptide                                                                                                          | 22    | 0.0053  | PBSN, TMEM87A, NEU1, BMP7, GDF15, SPON2, FKBP11, AGR2, ENHO                               |  |
| GOTERM_BP_FAT            | GO:0046364~monosaccharide biosynthetic process                                                                          | 3     | 0.0055  | ATF4, FBP1, FBP3                                                                          |  |
| GOTERM_BP_FAT            | GO:0048858~cell projection morphogenesis                                                                                | 5     | 0.0060  | NR4A2, ALMS1, EVL, WWTR1, BMP7                                                            |  |
| GOTERM_MF_FAT            | GO:0016893~endonuclease activity, active with either ribo- or deoxyribonucleic acids and producing 5'-phosphomonoesters | 3     | 0.0064  | MELA, ERN1, LOC280487                                                                     |  |
| GOTERM_BP_FAT            | GO:0032990~cell part morphogenesis                                                                                      | 5     | 0.0071  | NR4A2, ALMS1, EVL, WWTR1, BMP7                                                            |  |
| GOTERM_BP_FAT            | GO:0046165~alcohol biosynthetic process                                                                                 | 3     | 0.0078  | ATF4, FBP1, FBP3                                                                          |  |
| GOTERM_BP_FAT            | GO:0032989~cellular component morphogenesis                                                                             | 6     | 0.0084  | MELA, NR4A2, ALMS1, EVL, WWTR1, BMP7                                                      |  |
| GOTERM_MF_FAT            | GO:0042132~fructose 1,6-bisphosphate 1-phosphatase activity                                                             | 2     | 0.0106  | FBP1, FBP3                                                                                |  |
| GOTERM_CC_FAT            | GO:0044432~endoplasmic reticulum part                                                                                   | 5     | 0.0109  | HYOU1, P4HA2, ERN1, PDIA6, ASPH                                                           |  |
| INTERPRO                 | IPR000146:Fructose-1,6-bisphosphatase                                                                                   | 2     | 0.0109  | FBP1, FBP3                                                                                |  |
| GOTERM_BP_FAT            | GO:0009891~positive regulation of biosynthetic process                                                                  | 7     | 0.0145  | GATA2, TESC, ATF4, NR4A2, WWTR1, BMP7, SEC14L2                                            |  |
| GOTERM_MF_FAT            | GO:0004521~endoribonuclease activity                                                                                    | 3     | 0.0145  | MELA, ERN1, LOC280487                                                                     |  |
| GOTERM_BP_FAT            | GO:0045893~positive regulation of transcription, DNA-dependent                                                          | 6     | 0.0166  | GATA2, TESC, ATF4, NR4A2, WWTR1, BMP7                                                     |  |
| GOTERM_BP_FAT            | GO:0051254~positive regulation of RNA metabolic process                                                                 | 6     | 0.0171  | GATA2, TESC, ATF4, NR4A2, WWTR1, BMP7                                                     |  |
| GOTERM_BP_FAT            | GO:0034637~cellular carbohydrate biosynthetic process                                                                   | 3     | 0.0173  | ATF4, FBP1, FBP3                                                                          |  |
| UP_SEQ_FEATURE           | short sequence motif:Prevents secretion from ER                                                                         | 3     | 0.0239  | HYOU1, PDIA6, TMED9                                                                       |  |
| GOTERM_MF_FAT            | GO:0004540~ribonuclease activity                                                                                        | 3     | 0.0241  | MELA, ERN1, LOC280487                                                                     |  |
| GOTERM_BP_FAT            | GO:0000902~cell morphogenesis                                                                                           | 5     | 0.0249  | NR4A2, ALMS1, EVL, WWTR1, BMP7                                                            |  |
| GOTERM_BP_FAT            | GO:0045941~positive regulation of transcription                                                                         | 6     | 0.0276  | GATA2, TESC, ATF4, NR4A2, WWTR1, BMP7                                                     |  |
| GOTERM_BP_FAT            | GO:0030030~cell projection organization                                                                                 | 5     | 0.0276  | NR4A2, ALMS1, EVL, WWTR1, BMP7                                                            |  |
| INTERPRO                 | IPR002156:Ribonuclease H                                                                                                | 2     | 0.0289  | MELA, LOC280487                                                                           |  |
| GOTERM_CC_FAT            | GO:0005788~endoplasmic reticulum lumen                                                                                  | 3     | 0.0299  | HYOU1, P4HA2, PDIA6                                                                       |  |
| GOTERM_BP_FAT            | GO:0010628~positive regulation of gene expression                                                                       | 6     | 0.0305  | GATA2, TESC, ATF4, NR4A2, WWTR1, BMP7                                                     |  |

|               |                                                                                                         |   |        |                                       |
|---------------|---------------------------------------------------------------------------------------------------------|---|--------|---------------------------------------|
| GOTERM_MF_FAT | GO:0004523~ribonuclease H activity                                                                      | 2 | 0.0314 | MELA, LOC280487                       |
| GOTERM_BP_FAT | GO:0045935~positive regulation of nucleobase, nucleoside, nucleotide and nucleic acid metabolic process | 6 | 0.0359 | GATA2, TESC, ATF4, NR4A2, WWTR1, BMP7 |
| GOTERM_BP_FAT | GO:0016051~carbohydrate biosynthetic process                                                            | 3 | 0.0360 | ATF4, FBP1, FBP3                      |
| GOTERM_MF_FAT | GO:0019203~carbohydrate phosphatase activity                                                            | 2 | 0.0382 | FBP1, FBP3                            |
| INTERPRO      | IPR001584:Integrase, catalytic core                                                                     | 2 | 0.0395 | MELA, LOC280487                       |
| GOTERM_BP_FAT | GO:0045944~positive regulation of transcription from RNA polymerase II promoter                         | 5 | 0.0397 | GATA2, ATF4, NR4A2, WWTR1, BMP7       |
| GOTERM_BP_FAT | GO:0051173~positive regulation of nitrogen compound metabolic process                                   | 6 | 0.0402 | GATA2, TESC, ATF4, NR4A2, WWTR1, BMP7 |
| GOTERM_BP_FAT | GO:0010557~positive regulation of macromolecule biosynthetic process                                    | 6 | 0.0413 | GATA2, TESC, ATF4, NR4A2, WWTR1, BMP7 |
| GOTERM_BP_FAT | GO:0031328~positive regulation of cellular biosynthetic process                                         | 6 | 0.0478 | GATA2, TESC, ATF4, NR4A2, WWTR1, BMP7 |
| GOTERM_BP_FAT | GO:0015074~DNA integration                                                                              | 2 | 0.0493 | MELA, LOC280487                       |

#### PTEN Loss Unchanged, ERG Down

| Category        | Term                                                               | Count | P-Value | Genes                                                            |
|-----------------|--------------------------------------------------------------------|-------|---------|------------------------------------------------------------------|
| UP_SEQ_FEATURE  | domain:Peptidase S1                                                | 6     | 0.0008  | TMPRSS2, HPN, ST14, TMPRSS13, PROC, HABP2                        |
| INTERPRO        | IPR001314:Peptidase S1A, chymotrypsin                              | 6     | 0.0015  | TMPRSS2, HPN, ST14, TMPRSS13, PROC, HABP2                        |
| INTERPRO        | IPR018114:Peptidase S1/S6, chymotrypsin/Hap, active site           | 6     | 0.0019  | TMPRSS2, HPN, ST14, TMPRSS13, PROC, HABP2                        |
| SMART           | SM00020:Tryp_Spc                                                   | 6     | 0.0020  | TMPRSS2, HPN, ST14, TMPRSS13, PROC, HABP2                        |
| INTERPRO        | IPR001254:Peptidase S1 and S6, chymotrypsin/Hap                    | 6     | 0.0023  | TMPRSS2, HPN, ST14, TMPRSS13, PROC, HABP2                        |
| GOTERM_MF_FAT   | GO:0004175~endopeptidase activity                                  | 9     | 0.0030  | TMPRSS2, HPN, ADAMTS9, KEL, ST14, OSGEPL1, TMPRSS13, PROC, HABP2 |
| SP_PIR_KEYWORDS | Serine protease                                                    | 6     | 0.0031  | TMPRSS2, HPN, ST14, TMPRSS13, PROC, HABP2                        |
| UP_SEQ_FEATURE  | domain:SRCR                                                        | 3     | 0.0036  | TMPRSS2, HPN, TMPRSS13                                           |
| GOTERM_MF_FAT   | GO:0004252~serine-type endopeptidase activity                      | 6     | 0.0048  | TMPRSS2, HPN, ST14, TMPRSS13, PROC, HABP2                        |
| GOTERM_MF_FAT   | GO:0008236~serine-type peptidase activity                          | 6     | 0.0077  | TMPRSS2, HPN, ST14, TMPRSS13, PROC, HABP2                        |
| GOTERM_MF_FAT   | GO:0017171~serine hydrolase activity                               | 6     | 0.0078  | TMPRSS2, HPN, ST14, TMPRSS13, PROC, HABP2                        |
| UP_SEQ_FEATURE  | active site:Charge relay system                                    | 6     | 0.0094  | TMPRSS2, HPN, ST14, TMPRSS13, PROC, HABP2                        |
| GOTERM_BP_FAT   | GO:0016331~morphogenesis of embryonic epithelium                   | 4     | 0.0105  | ALDH1A1, OVOL2, LMO4, TCFAP2A                                    |
| SMART           | SM00202:SR                                                         | 3     | 0.0109  | TMPRSS2, HPN, TMPRSS13                                           |
| INTERPRO        | IPR017448:Speract/scavenger receptor related                       | 3     | 0.0114  | TMPRSS2, HPN, TMPRSS13                                           |
| INTERPRO        | IPR001190:Speract/scavenger receptor                               | 3     | 0.0122  | TMPRSS2, HPN, TMPRSS13                                           |
| KEGG_PATHWAY    | mmu03320:PPAR signaling pathway                                    | 4     | 0.0139  | CYP27A1, RXRG, SLC27A2, ACAA1B                                   |
| GOTERM_MF_FAT   | GO:0005044~scavenger receptor activity                             | 3     | 0.0214  | TMPRSS2, HPN, TMPRSS13                                           |
| GOTERM_MF_FAT   | GO:0070011~peptidase activity, acting on L-amino acid peptides     | 9     | 0.0231  | TMPRSS2, HPN, ADAMTS9, KEL, ST14, OSGEPL1, TMPRSS13, PROC, HABP2 |
| GOTERM_BP_FAT   | GO:0014020~primary neural tube formation                           | 3     | 0.0247  | OVOL2, LMO4, TCFAP2A                                             |
| GOTERM_BP_FAT   | GO:0009064~glutamine family amino acid metabolic process           | 3     | 0.0258  | GFPT1, ARG2, FAH                                                 |
| SMART           | SM00192:LDLa                                                       | 3     | 0.0281  | TMPRSS2, ST14, TMPRSS13                                          |
| GOTERM_MF_FAT   | GO:0008233~peptidase activity                                      | 9     | 0.0288  | TMPRSS2, HPN, ADAMTS9, KEL, ST14, OSGEPL1, TMPRSS13, PROC, HABP2 |
| INTERPRO        | IPR002172:Low density lipoprotein-receptor, class A, cysteine-rich | 3     | 0.0292  | TMPRSS2, ST14, TMPRSS13                                          |
| SP_PIR_KEYWORDS | Protease                                                           | 8     | 0.0334  | TMPRSS2, HPN, KEL, ST14, OSGEPL1, TMPRSS13, PROC, HABP2          |
| SP_PIR_KEYWORDS | hydrolase                                                          | 16    | 0.0338  | ST14, TMPRSS13, HABP2                                            |
| GOTERM_CC_FAT   | GO:0005576~extracellular region                                    | 17    | 0.0346  | 1190002N15RIK, ST14, GDF10, FGF1, ABO, HABP2                     |
| SP_PIR_KEYWORDS | Signal-anchor                                                      | 7     | 0.0350  | TMPRSS2, HPN, HS3ST6, KEL, ST14, TMPRSS13, ABO                   |
| GOTERM_BP_FAT   | GO:0001841~neural tube formation                                   | 3     | 0.0354  | OVOL2, LMO4, TCFAP2A                                             |
| GOTERM_BP_FAT   | GO:0001838~embryonic epithelial tube formation                     | 3     | 0.0393  | OVOL2, LMO4, TCFAP2A                                             |

|                |                                      |   |        |                                       |
|----------------|--------------------------------------|---|--------|---------------------------------------|
| GOTERM_BP_FAT  | GO:0035148~tube lumen formation      | 3 | 0.0461 | OVOL2, LMO4, TCFAP2A                  |
| UP_SEQ_FEATURE | region of interest:Substrate binding | 4 | 0.0478 | HS3ST6, ARG2, NT5C3, IP6K2            |
| GOTERM_BP_FAT  | GO:0048729~tissue morphogenesis      | 5 | 0.0498 | ALDH1A1, OVOL2, LMO4, TCFAP2A, TCF7L1 |

### PTEN Loss Unchanged, ERG Up

| Category        | Term                                      | Count | P-Value | Genes                                                                                                                                                                                                                                                                                                                                                                                                                                                                                                                                                                                                   |
|-----------------|-------------------------------------------|-------|---------|---------------------------------------------------------------------------------------------------------------------------------------------------------------------------------------------------------------------------------------------------------------------------------------------------------------------------------------------------------------------------------------------------------------------------------------------------------------------------------------------------------------------------------------------------------------------------------------------------------|
|                 |                                           |       |         | MMP9, CXCR1, DLK1, MEGF11, TGFB1, ST3GAL1, WISP1, CD93, ST3GAL4, SEMA7A, ANGPT2, ADAM9, CYR61, EGFL7, SPARCL1, TCN2, SMO, THBD, BACE2, PDGFRL, VCAN, ADAMTS1, TREM1, CHL1, TNFRSF22, FCER2A, IL4RA, MIA1, TNFRSF1A, LY6F, PVRL3, FGL2, PTX3, ANGPTL4, FN1, FCER1A, MUC2, CCL19, IGF2, HGF, TECPR1, FRZB, CCL11, VWF, FBLN1, THSD1, CXCL14, ITGA5, FBLN2, PECAM1, HBEGF, CP, HTR2B, TPSAB1                                                                                                                                                                                                               |
| SP_PIR_KEYWORDS | disulfide bond                            | 54    | 0.0000  | CP, HTR2B, TPSAB1                                                                                                                                                                                                                                                                                                                                                                                                                                                                                                                                                                                       |
|                 |                                           |       |         | SLCSA5, GLDN, MMP9, AQP5, CXCR1, DLK1, MEGF11, TGFB1, ST3GAL1, WISP1, CD93, ST3GAL4, SEMA7A, ASPH, ANO6, ANGPT2, ADAM9, GPR176, SPARCL1, SMO, THBD, BACE2, PDGFRL, VCAN, ADAMTS1, TREM1, TM4SF1, CHL1, FAIM2, TNFRSF22, FCER2A, IL4RA, UNC93B1, PLVAP, EPHB4, SERPINH1, SLC20A1, TNFRSF1A, CD177, LY6F, PVRL3, FGL2, FUT2, PTX3, FN1, ANGPTL4, FCER1A, MUC2, LMAN1L, 9930013L23RIK, SLC10A6, CCL19, DBC1, HGF, FRZB, LOC100047167, CCL11, CSGALNACT1, VWF, FBLN1, THSD1, ITGA5, FBLN2, PECAM1, HBEGF, CP, TPSAB1, HTR2B                                                                                 |
| SP_PIR_KEYWORDS | glycoprotein                              | 68    | 0.0000  | VWF, FBLN1, THSD1, ITGA5, FBLN2, PECAM1, HBEGF, CP, TPSAB1, HTR2B                                                                                                                                                                                                                                                                                                                                                                                                                                                                                                                                       |
|                 |                                           |       |         | MMP9, CXCR1, DLK1, MEGF11, TGFB1, ST3GAL1, WISP1, CD93, ST3GAL4, SEMA7A, ANGPT2, ADAM9, CYR61, EGFL7, SPARCL1, TCN2, SMO, THBD, BACE2, PDGFRL, VCAN, ADAMTS1, TREM1, CHL1, TNFRSF22, FCER2A, IL4RA, MIA1, TNFRSF1A, LY6F, PVRL3, FGL2, PTX3, ANGPTL4, FN1, FCER1A, MUC2, CCL19, IGF2, HGF, TECPR1, FRZB, CCL11, VWF, FBLN1, THSD1, CXCL14, ITGA5, FBLN2, PECAM1, HBEGF, CP, HTR2B, TPSAB1                                                                                                                                                                                                               |
| UP_SEQ_FEATURE  | disulfide bond                            | 54    | 0.0000  | CP, HTR2B, TPSAB1                                                                                                                                                                                                                                                                                                                                                                                                                                                                                                                                                                                       |
|                 |                                           |       |         | MMP9, RETNLG, DLK1, MEGF11, TGFB1, WISP1, CD93, SEMA7A, HTRA3, ANGPT2, ADAM9, CYR61, EGFL7, SPARCL1, SAA4, TCN2, SMO, THBD, BACE2, PDGFRL, VCAN, ADAMTS1, TREM1, CHL1, CCK, IL4RA, SERPINH1, OTOS, EPHB4, MIA1, TNFRSF1A, LY6F, CD177, PVRL3, FGL2, PTX3, FN1, ANGPTL4, FCER1A, MUC2, LMAN1L, 9930013L23RIK, CCL19, DBC1, IGF2, HGF, FRZB, CCL11, GCG, VWF, FBLN1, CXCL14, THSD1, ITGA5, FBLN2, PECAM1, HBEGF, CP, TPSAB1                                                                                                                                                                               |
| SP_PIR_KEYWORDS | signal                                    | 59    | 0.0000  | CXCL14, THSD1, ITGA5, FBLN2, PECAM1, HBEGF, CP, TPSAB1                                                                                                                                                                                                                                                                                                                                                                                                                                                                                                                                                  |
|                 |                                           |       |         | TNFRSF22, CCK, MMP9, IL4RA, OTOS, TGFB1, MIA1, ST3GAL1, WISP1, FGL2, HTRA3, PTX3, ANGPT2, CYR61, ANGPTL4, FN1, OTOP1, MUC2, EGFL7, SPARCL1, CCL19, SAA4, IGF2, TCN2, FRZB, GCG, CCL11, VWF, FBLN1, THBD, CXCL14, FBLN2, PDGFRL, HBEGF, VCAN, ADAMTS1, CP, CHL1                                                                                                                                                                                                                                                                                                                                          |
| SP_PIR_KEYWORDS | Secreted                                  | 37    | 0.0000  | VWF, FBLN1, CXCL14, FBLN2, PDGFRL, HBEGF, VCAN, ADAMTS1, CP, CHL1                                                                                                                                                                                                                                                                                                                                                                                                                                                                                                                                       |
|                 |                                           |       |         | TNFRSF22, CCK, MMP9, IL4RA, RETNLG, OTOS, TGFB1, MIA1, ST3GAL1, WISP1, FGL2, HTRA3, PTX3, ANGPT2, CYR61, ANGPTL4, FN1, ADAM9, OTOP1, MUC2, LOC100044256, EGFL7, SPARCL1, CCL19, SAA4, IGF2, TCN2, FRZB, GCG, CCL11, VWF, FBLN1, THBD, CXCL14, FBLN2, PDGFRL, HBEGF, VCAN, ADAMTS1, CP, CHL1                                                                                                                                                                                                                                                                                                             |
| GOTERM_CC_FAT   | GO:0005576~extracellular region           | 41    | 0.0000  | ADAMTS1, CP, CHL1                                                                                                                                                                                                                                                                                                                                                                                                                                                                                                                                                                                       |
|                 |                                           |       |         | MMP9, RETNLG, DLK1, MEGF11, TGFB1, WISP1, CD93, SEMA7A, HTRA3, ANGPT2, ADAM9, CYR61, EGFL7, SPARCL1, SAA4, TCN2, SMO, THBD, BACE2, PDGFRL, VCAN, ADAMTS1, TREM1, CHL1, CCK, IL4RA, SERPINH1, OTOS, EPHB4, MIA1, TNFRSF1A, LY6F, CD177, PVRL3, FGL2, PTX3, FN1, ANGPTL4, FCER1A, MUC2, LMAN1L, 9930013L23RIK, CCL19, DBC1, IGF2, HGF, FRZB, CCL11, GCG, VWF, FBLN1, CXCL14, THSD1, ITGA5, FBLN2, PECAM1, HBEGF, CP, TPSAB1                                                                                                                                                                               |
| UP_SEQ_FEATURE  | signal peptide                            | 59    | 0.0000  | CXCL14, THSD1, ITGA5, FBLN2, PECAM1, HBEGF, CP, TPSAB1                                                                                                                                                                                                                                                                                                                                                                                                                                                                                                                                                  |
|                 |                                           |       |         | SLCSA5, GLDN, MMP9, AQP5, CXCR1, DLK1, MEGF11, TGFB1, ST3GAL1, WISP1, CD93, ST3GAL4, SEMA7A, ASPH, ANO6, ANGPT2, ADAM9, GPR176, SPARCL1, SMO, THBD, BACE2, PDGFRL, VCAN, ADAMTS1, TREM1, TM4SF1, CHL1, FAIM2, TNFRSF22, FCER2A, IL4RA, UNC93B1, PLVAP, EPHB4, SERPINH1, SLC20A1, TNFRSF1A, CD177, PVRL3, FGL2, FUT2, PTX3, FN1, ANGPTL4, FCER1A, MUC2, LMAN1L, 9930013L23RIK, SLC10A6, CCL19, DBC1, HGF, FRZB, LOC100047167, CSGALNACT1, VWF, MUC2, EGFL7, DLK1, MEGF11, EPHB4, MUC3, TNFRSF1A, FBLN1, THBD, CD93, FBLN2, HBEGF, VCAN, FN1, ADAM9                                                       |
| UP_SEQ_FEATURE  | glycosylation site:N-linked (GlcNac...)   | 65    | 0.0000  | FBLN1, THSD1, ITGA5, FBLN2, PECAM1, CP, HTR2B, TPSAB1                                                                                                                                                                                                                                                                                                                                                                                                                                                                                                                                                   |
| INTERPRO        | IPR013032:EGF-like region, conserved site | 15    | 0.0000  | FN1, ADAM9                                                                                                                                                                                                                                                                                                                                                                                                                                                                                                                                                                                              |
|                 |                                           |       |         | MUC2, EGFL7, SPARCL1, MMP9, SAA4, CCL19, IGF2, TGFB1, CCL11, VWF, FBLN1, THBD, CXCL14, FBLN2, HBEGF, ADAMTS1, VCAN, CP, CHL1, ANGPTL4, ADAM9, OTOP1, FN1                                                                                                                                                                                                                                                                                                                                                                                                                                                |
| GOTERM_CC_FAT   | GO:0044421~extracellular region part      | 23    | 0.0000  | HBEGF, ADAMTS1, VCAN, CP, CHL1, ANGPTL4, ADAM9, OTOP1, FN1                                                                                                                                                                                                                                                                                                                                                                                                                                                                                                                                              |
| INTERPRO        | IPR000742:EGF-like, type 3                | 10    | 0.0002  | FBLN1, THBD, CD93, EGFL7, FBLN2, HBEGF, VCAN, DLK1, MEGF11, ADAM9                                                                                                                                                                                                                                                                                                                                                                                                                                                                                                                                       |
| INTERPRO        | IPR006210:EGF-like                        | 10    | 0.0002  | FBLN1, THBD, CD93, EGFL7, FBLN2, HBEGF, VCAN, DLK1, MEGF11, ADAM9                                                                                                                                                                                                                                                                                                                                                                                                                                                                                                                                       |
| SP_PIR_KEYWORDS | extracellular matrix                      | 10    | 0.0003  | VWF, FBLN1, FBLN2, SPARCL1, MMP9, VCAN, ADAMTS1, CHL1, FN1, ANGPTL4                                                                                                                                                                                                                                                                                                                                                                                                                                                                                                                                     |
|                 |                                           |       |         | RHOJ, SLCSA5, GLDN, SLC20A1, AQP5, PIP5K1C, CXCR1, DLK1, MEGF11, ST3GAL1, DAB2, DYSF, CD93, ST3GAL4, SEMA7A, KCNK6, NOS3, ASPH, AGPAT4, ANO6, ADAM9, SLC12A8, GPR176, UGCG, PCDH7, RFTN1, FLNC, ELMO1, SMO, THBD, BACE2, HAS2, PLLP, TREM1, TM4SF1, FAIM2, CHL1, GRASP, TNFRSF22, FCER2A, HSD3B7, 4930455C21RIK, IL4RA, UNC93B1, GIPC1, PLVAP, EPHB4, SLC20A1, TNFRSF1A, CD177, LY6F, TMEM125, PVRL3, PLCD3, FUT2, PLXND1, EHD3, OTOP1, SNX20, FCER1A, LMAN1L, ADSSL1, RAB8B, SLC10A6, LOC100047167, CSGALNACT1, THSD1, DIO2, PDE2A, ITGA5, DIO3, ATP2A3, PECAM1, HBEGF, ATP6V0A1, PARD6G, SYTL3, HTR2B |
| SP_PIR_KEYWORDS | membrane                                  | 78    | 0.0003  | ATP2A3, PECAM1, HBEGF, ATP6V0A1, PARD6G, SYTL3, HTR2B                                                                                                                                                                                                                                                                                                                                                                                                                                                                                                                                                   |
| SP_PIR_KEYWORDS | egf-like domain                           | 10    | 0.0004  | FBLN1, THBD, CD93, EGFL7, FBLN2, HBEGF, VCAN, DLK1, MEGF11, ADAM9                                                                                                                                                                                                                                                                                                                                                                                                                                                                                                                                       |
|                 |                                           |       |         | GO:0005578~proteinaceous                                                                                                                                                                                                                                                                                                                                                                                                                                                                                                                                                                                |
| GOTERM_CC_FAT   | extracellular matrix                      | 12    | 0.0004  | VWF, MUC2, FBLN1, FBLN2, SPARCL1, MMP9, VCAN, ADAMTS1, CHL1, TGFB1, FN1, ANGPTL4                                                                                                                                                                                                                                                                                                                                                                                                                                                                                                                        |
| GOTERM_CC_FAT   | GO:0031012~extracellular matrix           | 12    | 0.0006  | VWF, MUC2, FBLN1, FBLN2, SPARCL1, MMP9, VCAN, ADAMTS1, CHL1, TGFB1, FN1, ANGPTL4                                                                                                                                                                                                                                                                                                                                                                                                                                                                                                                        |
| UP_SEQ_FEATURE  | domain:EGF-like 1                         | 7     | 0.0010  | FBLN1, THBD, CD93, EGFL7, VCAN, DLK1, MEGF11                                                                                                                                                                                                                                                                                                                                                                                                                                                                                                                                                            |
| GOTERM_BP_FAT   | GO:0042060~wound healing                  | 7     | 0.0011  | VWF, THBD, DYSF, PECAM1, HBEGF, TGFB1, FN1                                                                                                                                                                                                                                                                                                                                                                                                                                                                                                                                                              |
|                 |                                           |       |         | EGFL7, SPARCL1, NCALD, MMP9, HPCAL4, DLK1, PCDH7, ANXA4, FBLN1, THBD, CD93, FBLN2, ATP2A3, ITGA5, PLCD3, NOS3, VCAN, ANO6, EHD3                                                                                                                                                                                                                                                                                                                                                                                                                                                                         |
| GOTERM_MF_FAT   | GO:0005509~calcium ion binding            | 19    | 0.0012  | ITGA5, PLCD3, NOS3, VCAN, ANO6, EHD3                                                                                                                                                                                                                                                                                                                                                                                                                                                                                                                                                                    |

|                 |                                                                      |    |        |                                                                                                                                                                                                                                                                                                                                                                                        |
|-----------------|----------------------------------------------------------------------|----|--------|----------------------------------------------------------------------------------------------------------------------------------------------------------------------------------------------------------------------------------------------------------------------------------------------------------------------------------------------------------------------------------------|
|                 |                                                                      |    |        | RHOJ, SLC5A5, GLDN, AQP5, PIP5K1C, CXCR1, DLK1, MEGF11, DYSF, CD93, SEMA7A, NOS3, ADAM9, GPR176, PCDH7, RFTN1, ELMO1, THBD, LRRK2, CHL1, GRASP, FAIM2, TNFRSF22, FCER2A, IL4RA, PLVAP, EPHB4, SLCO2A1, TNFRSF1A, LY6F, CD177, PVRL3, PLXND1, EHD3, SNX20, FN1, FCER1A, RAB8B, ANXA4, HTR2B                                                                                             |
| GOTERM_CC_FAT   | GO:0005886~plasma membrane                                           | 49 | 0.0013 | MUC3, VWF, DIO3, ITGA5, PECAM1, HBEGF, CP, SYTL3, PARD6G, HTR2B                                                                                                                                                                                                                                                                                                                        |
| UP_SEQ_FEATURE  | domain:CTCK                                                          | 4  | 0.0015 | VWF, MUC2, WISP1, CYR61                                                                                                                                                                                                                                                                                                                                                                |
| SMART           | SM00181:EGF                                                          | 10 | 0.0015 | FBLN1, THBD, CD93, EGFL7, FBLN2, HBEGF, VCAN, DLK1, MEGF11, ADAM9                                                                                                                                                                                                                                                                                                                      |
| INTERPRO        | IPR006207:Cystine knot, C-terminal                                   | 4  | 0.0017 | VWF, MUC2, WISP1, CYR61                                                                                                                                                                                                                                                                                                                                                                |
| GOTERM_BP_FAT   | GO:0031647~regulation of protein stability                           | 4  | 0.0021 | SMO, STXBP1, GIPC1, APBB2                                                                                                                                                                                                                                                                                                                                                              |
| INTERPRO        | IPR001881:EGF-like calcium-binding                                   | 6  | 0.0022 | FBLN1, THBD, CD93, FBLN2, VCAN, DLK1                                                                                                                                                                                                                                                                                                                                                   |
| SP_PIR_KEYWORDS | Signal-anchor                                                        | 12 | 0.0025 | LOC100047167                                                                                                                                                                                                                                                                                                                                                                           |
| INTERPRO        | IPR018097:EGF-like calcium-binding, conserved site                   | 6  | 0.0026 | FBLN1, THBD, CD93, EGFL7, FBLN2, VCAN                                                                                                                                                                                                                                                                                                                                                  |
| INTERPRO        | IPR000152:EGF-type aspartate/asparagine hydroxylation conserved site | 6  | 0.0026 | FBLN1, THBD, CD93, FBLN2, VCAN, DLK1                                                                                                                                                                                                                                                                                                                                                   |
| GOTERM_BP_FAT   | GO:0001525~angiogenesis                                              | 7  | 0.0026 | EGFL7, PLCD3, HBEGF, NOS3, PLXND1, ANGPT2, CYR61                                                                                                                                                                                                                                                                                                                                       |
| GOTERM_BP_FAT   | GO:0009611~response to wounding                                      | 11 | 0.0033 | CCL11, VWF, TNFRSF1A, THBD, DYSF, PECAM1, SAA4, CCL19, HBEGF, TGFB1, FN1                                                                                                                                                                                                                                                                                                               |
| SMART           | SM00041:CT                                                           | 4  | 0.0037 | VWF, MUC2, WISP1, CYR61                                                                                                                                                                                                                                                                                                                                                                |
| GOTERM_BP_FAT   | GO:0030198~extracellular matrix organization                         | 6  | 0.0040 | MIA1, FBLN1, MMP9, APBB2, SERPINH1, CYR61                                                                                                                                                                                                                                                                                                                                              |
| GOTERM_CC_FAT   | GO:0005615~extracellular space                                       | 14 | 0.0043 | EGFL7, MMP9, CCL19, SAA4, IGF2, TGFB1, CCL11, THBD, CXCL14, HBEGF, CP, OTOP1, ADAM9, ANGPTL4                                                                                                                                                                                                                                                                                           |
| INTERPRO        | IPR006208:Cystine knot                                               | 3  | 0.0043 | MUC2, WISP1, CYR61                                                                                                                                                                                                                                                                                                                                                                     |
| GOTERM_BP_FAT   | GO:0048514~blood vessel morphogenesis                                | 8  | 0.0046 | SMO, EGFL7, PLCD3, HBEGF, NOS3, PLXND1, ANGPT2, CYR61                                                                                                                                                                                                                                                                                                                                  |
| GOTERM_MF_FAT   | GO:0019865~immunoglobulin binding                                    | 3  | 0.0049 | FCER1A, VWF, FCER2A                                                                                                                                                                                                                                                                                                                                                                    |
| INTERPRO        | IPR013091:EGF calcium-binding                                        | 5  | 0.0051 | FBLN1, THBD, CD93, EGFL7, FBLN2                                                                                                                                                                                                                                                                                                                                                        |
|                 |                                                                      |    |        | RHOJ, ZBTB32, PIP5K1C, DLK1, MEGF11, DAB2, DYSF, HTRA3, ANO6, TTC39B, PID1, FMNL2, SLC12A8, EGFL7, STXBP1, FAM123A, FLNC, ELMO1, TTPAL, HNF4A, VCAN, BIN1, CHL1, FAIM2, TNFRSF22, FCER2A, CREM, IL4RA, GLIS1, UNC93B1, LOC100046025, SLCO2A1, RNF125, PVRL3, NDRG2, HAP1, FN1, OTOP1, MOCS1, FCER1A, NES, 9930013L23RIK, ADSSL1, MYO1B, CNKSR3, DBC1, RCAN1, TECPR1, HGF, DOCK6, HTR2B |
| SP_PIR_KEYWORDS | alternative splicing                                                 | 61 | 0.0061 | LRRRC49, VWF, FBLN1, RASL11A, ATP2A3, FBLN2, PECAM1, ATP6V0A1, SYTL3, APBB2, TPSAB1                                                                                                                                                                                                                                                                                                    |
| UP_SEQ_FEATURE  | domain:EGF-like 3; calcium-binding                                   | 4  | 0.0064 | FBLN1, THBD, CD93, FBLN2                                                                                                                                                                                                                                                                                                                                                               |
| SP_PIR_KEYWORDS | calcium                                                              | 16 | 0.0066 | VCAN, ANO6, EHD3                                                                                                                                                                                                                                                                                                                                                                       |
| GOTERM_BP_FAT   | GO:0000904~cell morphogenesis involved in differentiation            | 8  | 0.0066 | DAB2, CCK, KIF5C, STXBP1, PIP5K1C, APBB2, CHL1, TGFB1                                                                                                                                                                                                                                                                                                                                  |
| GOTERM_MF_FAT   | GO:0032403~protein complex binding                                   | 5  | 0.0070 | FCER1A, VWF, DOK1, FCER2A, ITGA5                                                                                                                                                                                                                                                                                                                                                       |
| SMART           | SM00179:EGF_CA                                                       | 6  | 0.0071 | FBLN1, THBD, CD93, FBLN2, VCAN, DLK1                                                                                                                                                                                                                                                                                                                                                   |
| GOTERM_MF_FAT   | GO:0005525~GTP binding                                               | 10 | 0.0076 | RHOJ, ADSSL1, RASL11A, RAB8B, TUBB6, TUBA1A, LRRK2, DOCK6, EHD3, MOCS1                                                                                                                                                                                                                                                                                                                 |
| GOTERM_MF_FAT   | GO:0030247~polysaccharide binding                                    | 6  | 0.0082 | HBEGF, VCAN, ADAMTS1, PTX3, FN1, CYR61                                                                                                                                                                                                                                                                                                                                                 |
| GOTERM_MF_FAT   | GO:0001871~pattern binding                                           | 6  | 0.0082 | HBEGF, VCAN, ADAMTS1, PTX3, FN1, CYR61                                                                                                                                                                                                                                                                                                                                                 |
| INTERPRO        | IPR001007:von Willebrand factor, type C                              | 4  | 0.0085 | VWF, MUC2, WISP1, CYR61                                                                                                                                                                                                                                                                                                                                                                |
| GOTERM_BP_FAT   | GO:0008285~negative regulation of cell proliferation                 | 8  | 0.0088 | MUC2, CDKN1A, HNF4A, NOS3, ASPH, ZEB1, TGFB1, H19                                                                                                                                                                                                                                                                                                                                      |
| GOTERM_MF_FAT   | GO:0032561~guanyl ribonucleotide binding                             | 10 | 0.0089 | RHOJ, ADSSL1, RASL11A, RAB8B, TUBB6, TUBA1A, LRRK2, DOCK6, EHD3, MOCS1                                                                                                                                                                                                                                                                                                                 |
| GOTERM_MF_FAT   | GO:0019001~guanyl nucleotide binding                                 | 10 | 0.0089 | RHOJ, ADSSL1, RASL11A, RAB8B, TUBB6, TUBA1A, LRRK2, DOCK6, EHD3, MOCS1                                                                                                                                                                                                                                                                                                                 |
| INTERPRO        | IPR006209:EGF short sequence motif:Cell attachment site              | 6  | 0.0094 | THBD, CD93, EGFL7, HBEGF, VCAN, DLK1                                                                                                                                                                                                                                                                                                                                                   |
| UP_SEQ_FEATURE  | GO:0045786~negative regulation of cell cycle                         | 5  | 0.0094 | VWF, FBLN2, SEMA7A, TGFB1, FN1                                                                                                                                                                                                                                                                                                                                                         |
| GOTERM_BP_FAT   | GO:0045786~negative regulation of cell cycle                         | 4  | 0.0100 | CDKN1A, HNF4A, DBC1, APBB2                                                                                                                                                                                                                                                                                                                                                             |
| UP_SEQ_FEATURE  | domain:EGF-like 2                                                    | 5  | 0.0107 | THBD, CD93, FBLN2, DLK1, MEGF11                                                                                                                                                                                                                                                                                                                                                        |
| SP_PIR_KEYWORDS | cell membrane                                                        | 28 | 0.0113 | GRASP, CHL1                                                                                                                                                                                                                                                                                                                                                                            |
| UP_SEQ_FEATURE  | glycosylation site:O-linked (GalNAc...)                              | 4  | 0.0113 | CCL11, VWF, HBEGF, DLK1                                                                                                                                                                                                                                                                                                                                                                |
| GOTERM_BP_FAT   | GO:0050821~protein stabilization                                     | 3  | 0.0117 | SMO, STXBP1, APBB2                                                                                                                                                                                                                                                                                                                                                                     |
| GOTERM_BP_FAT   | GO:0044092~negative regulation of molecular function                 | 6  | 0.0121 | SMO, IRAK3, CDKN1A, HNF4A, NOS3, ANGPTL4                                                                                                                                                                                                                                                                                                                                               |
| GOTERM_MF_FAT   | GO:0030246~carbohydrate binding                                      | 9  | 0.0121 | LMAN1L, FCER2A, CD93, HBEGF, VCAN, ADAMTS1, PTX3, FN1, CYR61                                                                                                                                                                                                                                                                                                                           |

|                 |                                                                                                                                                    |    |                                                                                                                                                                                                                                                                                                                        |
|-----------------|----------------------------------------------------------------------------------------------------------------------------------------------------|----|------------------------------------------------------------------------------------------------------------------------------------------------------------------------------------------------------------------------------------------------------------------------------------------------------------------------|
| UP_SEQ_FEATURE  | domain:TSP type-1<br>GO:0001568~blood vessel development                                                                                           | 3  | 0.0127 WISP1, THSD1, CYR61                                                                                                                                                                                                                                                                                             |
| GOTERM_BP_FAT   |                                                                                                                                                    | 8  | 0.0137 SMO, EGFL7, PLCD3, HBEGF, NOS3, PLXND1, ANGPT2, CYR61                                                                                                                                                                                                                                                           |
| INTERPRO        | IPR003599:Immunoglobulin subtype                                                                                                                   | 9  | 0.0138 FCER1A, PVRL3, SEMA7A, PECAM1, PDGFRL, VCAN, TREM1, TREM3, CHL1                                                                                                                                                                                                                                                 |
| SP_PIR_KEYWORDS | cell adhesion                                                                                                                                      | 10 | 0.0142 VWF, WISP1, CD93, ITGA5, PVRL3, PECAM1, PCDH7, CHL1, FN1, CYR61                                                                                                                                                                                                                                                 |
| GOTERM_CC_FAT   | GO:0045121~membrane raft<br>IPR000867:Insulin-like growth factor-binding protein, IGFBP                                                            | 5  | 0.0144 FCER1A, TNFRSF1A, PECAM1, NOS3, LRRK2                                                                                                                                                                                                                                                                           |
| INTERPRO        |                                                                                                                                                    | 3  | 0.0153 WISP1, HTRA3, CYR61                                                                                                                                                                                                                                                                                             |
| GOTERM_BP_FAT   | GO:0000902~cell morphogenesis                                                                                                                      | 9  | 0.0153 DAB2, CCK, KIF5C, STXBP1, PIP5K1C, HGF, APBB2, CHL1, TGFB1                                                                                                                                                                                                                                                      |
| GOTERM_BP_FAT   | GO:0001558~regulation of cell growth                                                                                                               | 5  | 0.0154 WISP1, HTRA3, APBB2, TGFB1, CYR61                                                                                                                                                                                                                                                                               |
| GOTERM_BP_FAT   | GO:0001944~vasculature development                                                                                                                 | 8  | 0.0155 SMO, EGFL7, PLCD3, HBEGF, NOS3, PLXND1, ANGPT2, CYR61                                                                                                                                                                                                                                                           |
| SP_PIR_KEYWORDS | heparin-binding                                                                                                                                    | 4  | 0.0159 HBEGF, ADAMTS1, FN1, CYR61                                                                                                                                                                                                                                                                                      |
| UP_SEQ_FEATURE  | domain:IGFBP N-terminal                                                                                                                            | 3  | 0.0160 WISP1, HTRA3, CYR61                                                                                                                                                                                                                                                                                             |
| GOTERM_CC_FAT   | GO:0045177~apical part of cell                                                                                                                     | 6  | 0.0173 AQP5, NOS3, ANXA4, CHL1, MUC3, FN1                                                                                                                                                                                                                                                                              |
| SMART           | SM00214:VWC                                                                                                                                        | 4  | 0.0179 VWF, MUC2, WISP1, CYR61                                                                                                                                                                                                                                                                                         |
| KEGG_PATHWAY    | mmu04060:Cytokine-cytokine receptor interaction                                                                                                    | 8  | 0.0182 CCL11, TNFRSF1A, CXCL14, IL4RA, CCL19, CXCR1, HGF, TGFB1                                                                                                                                                                                                                                                        |
| INTERPRO        | IPR014716:Fibrinogen, alpha/beta/gamma chain, C-terminal globular, subdomain 1                                                                     | 3  | 0.0185 FGL2, ANGPT2, ANGPTL4                                                                                                                                                                                                                                                                                           |
| INTERPRO        | IPR002073:3'-5'-cyclic nucleotide phosphodiesterase                                                                                                | 3  | 0.0185 PDE1B, PDE2A, PDE4B                                                                                                                                                                                                                                                                                             |
| GOTERM_MF_FAT   | GO:0005520~insulin-like growth factor binding                                                                                                      | 3  | 0.0190 WISP1, HTRA3, CYR61                                                                                                                                                                                                                                                                                             |
| GOTERM_BP_FAT   | GO:0043062~extracellular structure organization                                                                                                    | 6  | 0.0195 MIA1, FBLN1, MMP9, APBB2, SERPINH1, CYR61                                                                                                                                                                                                                                                                       |
| UP_SEQ_FEATURE  | domain:PDZ                                                                                                                                         | 5  | 0.0199 CNKSR3, GIPC1, PARD6G, HTRA3, GRASP                                                                                                                                                                                                                                                                             |
| INTERPRO        | IPR016316:Complement component C1q/Thrombomodulin                                                                                                  | 2  | 0.0199 THBD, CD93                                                                                                                                                                                                                                                                                                      |
| GOTERM_BP_FAT   | GO:0002822~regulation of adaptive immune response based on somatic recombination of immune receptors built from immunoglobulin superfamily domains | 4  | 0.0203 FCER1A, FCER2A, IL4RA, TGFB1                                                                                                                                                                                                                                                                                    |
| GOTERM_BP_FAT   | GO:0002819~regulation of adaptive immune response                                                                                                  | 4  | 0.0203 FCER1A, FCER2A, IL4RA, TGFB1                                                                                                                                                                                                                                                                                    |
| GOTERM_BP_FAT   | GO:0002684~positive regulation of immune system process                                                                                            | 7  | 0.0205 FCER1A, FCER2A, IRAK3, CDKN1A, IL4RA, UNC93B1, TGFB1                                                                                                                                                                                                                                                            |
| GOTERM_BP_FAT   | GO:0042404~thyroid hormone catabolic process                                                                                                       | 2  | 0.0206 DIO2, DIO3                                                                                                                                                                                                                                                                                                      |
| INTERPRO        | IPR000884:Thrombospondin, type 1 repeat                                                                                                            | 4  | 0.0213 WISP1, THSD1, ADAMTS1, CYR61                                                                                                                                                                                                                                                                                    |
| GOTERM_BP_FAT   | GO:0042306~regulation of protein import into nucleus                                                                                               | 3  | 0.0216 SMO, HNF4A, TGFB1                                                                                                                                                                                                                                                                                               |
| UP_SEQ_FEATURE  | domain:Anaphylatoxin-like 1                                                                                                                        | 2  | 0.0216 FBLN1, FBLN2                                                                                                                                                                                                                                                                                                    |
| UP_SEQ_FEATURE  | glycosylation site:N-linked (GlcNAc...); atypical                                                                                                  | 2  | 0.0216 VWF, DLK1                                                                                                                                                                                                                                                                                                       |
| UP_SEQ_FEATURE  | domain:Anaphylatoxin-like 2                                                                                                                        | 2  | 0.0216 FBLN1, FBLN2                                                                                                                                                                                                                                                                                                    |
| UP_SEQ_FEATURE  | domain:Anaphylatoxin-like 3                                                                                                                        | 2  | 0.0216 FBLN1, FBLN2                                                                                                                                                                                                                                                                                                    |
| INTERPRO        | IPR018029:C2 membrane targeting protein                                                                                                            | 5  | 0.0220 CPNE8, DYSF, PLCD3, SYTL3, CPNE2<br>TNFRSF22, FCER2A, SLC5A5, SLC20A1, GLDN, IL4RA, AQP5, CXCR1, PLVAP, DLK1, EPHB4, ST3GAL1, TNFRSF1A, DYSF, CD93, ST3GAL4, PVRL3, FUT2, ASPH, ANO6, ADAM9, FCER1A, GPR176, SLC10A6, LOC100047167, CSGALNACT1, SMO, THBD, THSD1, ITGA5, ATP2A3, DIO3, BACE2, PECAM1, ATP6V0A1, |
| UP_SEQ_FEATURE  | topological domain:Cytoplasmic                                                                                                                     | 42 | 0.0220 HBEGF, PLLP, HAS2, TREM1, TM4SF1, HTR2B, CHL1                                                                                                                                                                                                                                                                   |
| PIR_SUPERFAMILY | PIRSF001775:thrombomodulin                                                                                                                         | 2  | 0.0222 THBD, CD93                                                                                                                                                                                                                                                                                                      |
| PIR_SUPERFAMILY | PIRSF001775:CD93/CD141                                                                                                                             | 2  | 0.0222 THBD, CD93                                                                                                                                                                                                                                                                                                      |
| GOTERM_MF_FAT   | GO:0004114~3',5'-cyclic-nucleotide phosphodiesterase activity                                                                                      | 3  | 0.0225 PDE1B, PDE2A, PDE4B                                                                                                                                                                                                                                                                                             |
| GOTERM_BP_FAT   | GO:0007265~Ras protein signal transduction                                                                                                         | 4  | 0.0233 RHOJ, DOK1, PECAM1, ELMO1                                                                                                                                                                                                                                                                                       |
| SP_PIR_KEYWORDS | myristate                                                                                                                                          | 5  | 0.0237 RNF125, NCALD, HPCAL4, NOS3, RFTN1                                                                                                                                                                                                                                                                              |
| INTERPRO        | IPR003607:Metal-dependent phosphohydrolase, HD region                                                                                              | 3  | 0.0239 PDE1B, PDE2A, PDE4B                                                                                                                                                                                                                                                                                             |
| SP_PIR_KEYWORDS | chemotaxis                                                                                                                                         | 4  | 0.0240 CCL11, CCL19, CXCR1, CYR61                                                                                                                                                                                                                                                                                      |
| UP_SEQ_FEATURE  | domain:C2 1                                                                                                                                        | 4  | 0.0240 CPNE8, DYSF, SYTL3, CPNE2                                                                                                                                                                                                                                                                                       |
| UP_SEQ_FEATURE  | domain:C2 2                                                                                                                                        | 4  | 0.0240 CPNE8, DYSF, SYTL3, CPNE2                                                                                                                                                                                                                                                                                       |
| GOTERM_MF_FAT   | GO:0004112~cyclic-nucleotide phosphodiesterase activity                                                                                            | 3  | 0.0242 PDE1B, PDE2A, PDE4B                                                                                                                                                                                                                                                                                             |
| GOTERM_MF_FAT   | GO:0005539~glycosaminoglycan binding                                                                                                               | 5  | 0.0250 HBEGF, VCAN, ADAMTS1, FN1, CYR61                                                                                                                                                                                                                                                                                |

|                 |                                                                                                               |    |                                                                                                                                                                                                                                      |
|-----------------|---------------------------------------------------------------------------------------------------------------|----|--------------------------------------------------------------------------------------------------------------------------------------------------------------------------------------------------------------------------------------|
| UP_SEQ_FEATURE  | domain:EGF-like 6; calcium-binding                                                                            | 3  | 0.0256 FBLN1, THBD, FBLN2                                                                                                                                                                                                            |
| SMART           | SM00121:IB                                                                                                    | 3  | 0.0257 WISP1, HTRA3, CYR61                                                                                                                                                                                                           |
| GOTERM_BP_FAT   | GO:0007409~axonogenesis                                                                                       | 6  | 0.0275 CCK, KIF5C, STXB1, PIP5K1C, APBB2, CHL1<br>TNFRSF22, FCER2A, SLC5A5, GLDN, SLC20A1, IL4RA, AQP5, CXCR1, PLVAP, DLK1, EPHB4, TNFRSF1A, DYSF, CD93, PVRL3, ANO6, ADAM9, FCER1A, GPR176, SLC10A6, SMO, THBD, THSD1, ITGA5, DIO3, |
| UP_SEQ_FEATURE  | topological domain:Extracellular lipid moiety-binding region:N-myristoyl                                      | 34 | 0.0278 BACE2, PECAM1, HBEGF, PLLP, HAS2, TREM1, TM4SF1, HTR2B, CHL1                                                                                                                                                                  |
| UP_SEQ_FEATURE  | glycine                                                                                                       | 5  | 0.0284 RNF125, NCALD, HPCAL4, NOS3, RFTN1                                                                                                                                                                                            |
| GOTERM_MF_FAT   | GO:0004800~thyroxine 5'-deiodinase activity                                                                   | 2  | 0.0288 DIO2, DIO3                                                                                                                                                                                                                    |
| INTERPRO        | IPR008261:Iodothyronine deiodinase, active site                                                               | 2  | 0.0298 DIO2, DIO3                                                                                                                                                                                                                    |
| INTERPRO        | IPR006614:Dysferlin, C-terminal                                                                               | 2  | 0.0298 DYSF, TECPR1                                                                                                                                                                                                                  |
| INTERPRO        | IPR006613:Dysferlin, N-terminal                                                                               | 2  | 0.0298 DYSF, TECPR1                                                                                                                                                                                                                  |
| INTERPRO        | IPR000643:Iodothyronine deiodinase                                                                            | 2  | 0.0298 DIO2, DIO3                                                                                                                                                                                                                    |
| GOTERM_BP_FAT   | GO:0009310~amine catabolic process                                                                            | 4  | 0.0299 BCAT1, DIO2, DIO3, HDC                                                                                                                                                                                                        |
| GOTERM_BP_FAT   | GO:0032989~cellular component morphogenesis                                                                   | 9  | 0.0300 DAB2, CCK, KIF5C, STXB1, PIP5K1C, HGF, APBB2, CHL1, TGFB1                                                                                                                                                                     |
| GOTERM_BP_FAT   | GO:0007155~cell adhesion                                                                                      | 12 | 0.0318 MIA1, VWF, WISP1, CD93, ITGA5, PVRL3, PECAM1, VCAN, PCDH7, CHL1, FN1, CYR61                                                                                                                                                   |
| INTERPRO        | IPR002181:Fibrinogen, alpha/beta/gamma chain, C-terminal globular                                             | 3  | 0.0318 FGL2, ANGPT2, ANGPTL4                                                                                                                                                                                                         |
| GOTERM_BP_FAT   | GO:0022610~biological adhesion                                                                                | 12 | 0.0321 MIA1, VWF, WISP1, CD93, ITGA5, PVRL3, PECAM1, VCAN, PCDH7, CHL1, FN1, CYR61                                                                                                                                                   |
| SP_PIR_KEYWORDS | cleavage on pair of basic residues                                                                            | 7  | 0.0323 GCG, VWF, CCK, ITGA5, IGF2, ADAMTS1, TGFB1                                                                                                                                                                                    |
| GOTERM_MF_FAT   | GO:0008081~phosphoric diester hydrolase activity                                                              | 4  | 0.0328 PDE1B, PDE2A, PDE4B, PLCD3                                                                                                                                                                                                    |
| PIR_SUPERFAMILY | PIRSF001330:iodothyronine deiodinase                                                                          | 2  | 0.0332 DIO2, DIO3                                                                                                                                                                                                                    |
| GOTERM_BP_FAT   | GO:0009101~glycoprotein biosynthetic process                                                                  | 5  | 0.0335 ST3GAL1, CSGALNACT1, ST3GAL4, FUT2, LOC100047167                                                                                                                                                                              |
| SP_PIR_KEYWORDS | lipoprotein                                                                                                   | 12 | 0.0342 RNF125, RHOJ, RAB8B, CD177, NCALD, LY6F, SEMA7A, HPCAL4, NOS3, RFTN1, RGS16, HTR2B                                                                                                                                            |
| UP_SEQ_FEATURE  | domain:Fibrinogen C-terminal                                                                                  | 3  | 0.0345 FGL2, ANGPT2, ANGPTL4                                                                                                                                                                                                         |
| GOTERM_MF_FAT   | GO:0008047~enzyme activator activity                                                                          | 7  | 0.0345 FBLN1, RAP1GAP, RANBP1, GIPC1, RGS16, LRRK2, FN1                                                                                                                                                                              |
| GOTERM_BP_FAT   | GO:0048812~neuron projection morphogenesis                                                                    | 6  | 0.0365 CCK, KIF5C, STXB1, PIP5K1C, APBB2, CHL1                                                                                                                                                                                       |
| GOTERM_BP_FAT   | GO:0006928~cell motion                                                                                        | 9  | 0.0375 SMO, CCK, KIF5C, HBEGF, GIPC1, APBB2, CHL1, TGFB1, ELMO1                                                                                                                                                                      |
| SP_PIR_KEYWORDS | gtp-binding                                                                                                   | 8  | 0.0377 RHOJ, ADSSL1, RASL11A, RAB8B, TUBB6, TUBA1A, LRRK2, MOCS1                                                                                                                                                                     |
| GOTERM_BP_FAT   | GO:0044271~nitrogen compound biosynthetic process                                                             | 8  | 0.0380 BCAT1, DCTD, ADSSL1, ATP2A3, HDC, ATP6V0A1, NOS3, MOCS1                                                                                                                                                                       |
| GOTERM_MF_FAT   | GO:0047238~glucuronosyl-N-acetylgalactosaminyl-proteoglycan 4-beta-N-acetylgalactosaminyltransferase activity | 2  | 0.0383 CSGALNACT1, LOC100047167                                                                                                                                                                                                      |
| SP_PIR_KEYWORDS | growth factor                                                                                                 | 5  | 0.0384 MIA1, HBEGF, IGF2, HGF, TGFB1                                                                                                                                                                                                 |
| GOTERM_BP_FAT   | GO:0017015~regulation of transforming growth factor beta receptor signaling pathway                           | 3  | 0.0385 D0H4S114, GIPC1, ZEB1                                                                                                                                                                                                         |
| GOTERM_BP_FAT   | GO:0002712~regulation of B cell mediated immunity                                                             | 3  | 0.0385 FCER1A, FCER2A, TGFB1                                                                                                                                                                                                         |
| GOTERM_BP_FAT   | GO:0002889~regulation of immunoglobulin mediated immune response                                              | 3  | 0.0385 FCER1A, FCER2A, TGFB1                                                                                                                                                                                                         |
| GOTERM_BP_FAT   | GO:0033157~regulation of intracellular protein transport                                                      | 3  | 0.0385 SMO, HNF4A, TGFB1                                                                                                                                                                                                             |
| GOTERM_BP_FAT   | GO:0016477~cell migration                                                                                     | 7  | 0.0391 SMO, CCK, HBEGF, GIPC1, APBB2, CHL1, TGFB1                                                                                                                                                                                    |
| SMART           | SM00694:DysFC                                                                                                 | 2  | 0.0392 DYSF, TECPR1                                                                                                                                                                                                                  |
| SMART           | SM00693:DysFN                                                                                                 | 2  | 0.0392 DYSF, TECPR1                                                                                                                                                                                                                  |
| INTERPRO        | IPR012395:IGFBP-related, CNN                                                                                  | 2  | 0.0395 WISP1, CYR61                                                                                                                                                                                                                  |
| SMART           | SM00471:Hdc                                                                                                   | 3  | 0.0398 PDE1B, PDE2A, PDE4B                                                                                                                                                                                                           |
| GOTERM_BP_FAT   | GO:0048667~cell morphogenesis involved in neuron differentiation                                              | 6  | 0.0411 CCK, KIF5C, STXB1, PIP5K1C, APBB2, CHL1                                                                                                                                                                                       |
| GOTERM_BP_FAT   | GO:0051101~regulation of DNA binding                                                                          | 4  | 0.0416 SMO, IRAK3, HNF4A, TGFB1                                                                                                                                                                                                      |
| UP_SEQ_FEATURE  | domain:EGF-like 5; calcium-binding                                                                            | 3  | 0.0418 FBLN1, CD93, FBLN2                                                                                                                                                                                                            |
| INTERPRO        | IPR000008:C2 calcium-dependent membrane targeting                                                             | 5  | 0.0419 CPNE8, DYSF, PLCD3, SYTL3, CPNE2                                                                                                                                                                                              |
| UP_SEQ_FEATURE  | domain:Fibronectin type-II 1                                                                                  | 2  | 0.0427 MMP9, FN1                                                                                                                                                                                                                     |
| UP_SEQ_FEATURE  | domain:Fibronectin type-II 2                                                                                  | 2  | 0.0427 MMP9, FN1                                                                                                                                                                                                                     |
| INTERPRO        | IPR011497:Protease inhibitor, Kazal-type                                                                      | 3  | 0.0430 SPARCL1, HTRA3, SLC02A1                                                                                                                                                                                                       |



|                 |                                                                                             |    |        |                                                                                                                                                                                                                                                                                                                                                                                                                                                               |
|-----------------|---------------------------------------------------------------------------------------------|----|--------|---------------------------------------------------------------------------------------------------------------------------------------------------------------------------------------------------------------------------------------------------------------------------------------------------------------------------------------------------------------------------------------------------------------------------------------------------------------|
| SMART           | SM00209:TSP1                                                                                | 4  | 0.0432 | WISP1, THSD1, ADAMTS1, CYR61                                                                                                                                                                                                                                                                                                                                                                                                                                  |
| GOTERM_BP_FAT   | GO:0034330~cell junction organization<br>GO:0042176~regulation of protein catabolic process | 3  | 0.0433 | HNF4A, ITGA5, FN1                                                                                                                                                                                                                                                                                                                                                                                                                                             |
| GOTERM_BP_FAT   | PIRSF036495:IGFBP-related protein, CNN type                                                 | 3  | 0.0433 | IRAK3, GIPC1, ADAM9                                                                                                                                                                                                                                                                                                                                                                                                                                           |
| PIR_SUPERFAMILY | PIRSF036495:IGFBP_rP_CNN                                                                    | 2  | 0.0440 | WISP1, CYR61                                                                                                                                                                                                                                                                                                                                                                                                                                                  |
| PIR_SUPERFAMILY | GO:0008201~heparin binding                                                                  | 2  | 0.0440 | WISP1, CYR61                                                                                                                                                                                                                                                                                                                                                                                                                                                  |
| GOTERM_MF_FAT   |                                                                                             | 4  | 0.0469 | HBEGF, ADAMTS1, FN1, CYR61                                                                                                                                                                                                                                                                                                                                                                                                                                    |
| UP_SEQ_FEATURE  | domain:EGF-like 4; calcium-binding                                                          | 3  | 0.0470 | FBLN1, CD93, FBLN2                                                                                                                                                                                                                                                                                                                                                                                                                                            |
| GOTERM_MF_FAT   | GO:0019863~IgE binding                                                                      | 2  | 0.0476 | FCER1A, FCER2A                                                                                                                                                                                                                                                                                                                                                                                                                                                |
| GOTERM_MF_FAT   | GO:0008083~growth factor activity                                                           | 5  | 0.0485 | MIA1, HBEGF, IGF2, HGF, TGFBI                                                                                                                                                                                                                                                                                                                                                                                                                                 |
| SP_PIR_KEYWORDS | Thyroid hormones biosynthesis                                                               | 2  | 0.0489 | DIO2, DIO3                                                                                                                                                                                                                                                                                                                                                                                                                                                    |
| SP_PIR_KEYWORDS | ige-binding protein                                                                         | 2  | 0.0489 | FCER1A, FCER2A                                                                                                                                                                                                                                                                                                                                                                                                                                                |
| SP_PIR_KEYWORDS | phosphoprotein                                                                              | 75 | 0.0489 | RHOJ, SLC5A5, SLC20A1, PIP5K1C, ZEB1, MAP3K6, DAB2, D0H4S114, DYSF, CD93, HDC, TUBB6, RANBP1, NOS3, ASPH, TUBA1A, TTC39B, ADAM9, PID1, FMNL2, SPARCL1, KIF5C, STXB1, RFTN1, FLNC, FAM123A, ELMO1, SMO, DOK1, THBD, HNF4A, PLLP, BIN1, FAIM2, GRASP, CHL1, TSHZ3, ALDOC, CREM, IL4RA, UNC93B1, EPHB4, LOC100046025, IRAK3, PDE1B, PVRL3, PLCD3, PLEKHO2, SNX24, NDRG2, EHD3, FN1, CPNE8, DCTD, MUC2, NES, 9930013L23RIK, ADSSL1, RAB8B, CNKSR3, FSCN1, TECPR1, |
| SP_PIR_KEYWORDS | glycosyltransferase                                                                         | 6  | 0.0498 | RGS16, DOCK6, ANXA4, CDKN1A, PDE2A, PYGL, ATP2A3, PECAM1, ATP6V0A1, GRK5, SYTL3, CP, APBB2, ST3GAL1, ST3GAL4, PYGL, UGCG, HAS2, FUT2                                                                                                                                                                                                                                                                                                                          |

### PTEN Loss Up ERG Down

| Category        | Term                                                               | Count | P-Value | Genes                                                                                                                                                                                                                                                                                                                                                                                                                                                                |
|-----------------|--------------------------------------------------------------------|-------|---------|----------------------------------------------------------------------------------------------------------------------------------------------------------------------------------------------------------------------------------------------------------------------------------------------------------------------------------------------------------------------------------------------------------------------------------------------------------------------|
| GOTERM_BP_FAT   | GO:0060429~epithelium development                                  | 9     | 0.0025  | COBL, WNT4, EVPL, ELF3, SPRR1A, LMO4, SIX1, KRT4, CAR2<br>MUG1, CADM1, ADCY8, FAM3B, F2RL1, CXADR, WNT4, ST3GAL5, LRRC52, TREH, TRPV6, CD200R3, GOLM1, UGT8A, CLCA3, SLC22A23, TIMD2, IGFALS, CERCAM, CWH43, CHST8, EMP2, PAMR1, PSAPL1, IGSF11, FNDC5, MSLN, ITGB6, ENTPD8, ABCD3, CLEC2E, SLC39A4, HGFAC, FAM55D, GABRP, MUC1, HAVCR1, MUC20, OPN1MW, FZD5, SECTM1B, TNFSF10, TMEM117, P2RX6, TFRC, CDON, SLC5A9, LIPH,                                            |
| SP_PIR_KEYWORDS | glycoprotein<br>mmu00980:Metabolism of xenobiotics                 | 49    | 0.0026  | GM7298, UTS2R                                                                                                                                                                                                                                                                                                                                                                                                                                                        |
| KEGG_PATHWAY    | by cytochrome P450<br>GO:0030855~epithelial cell differentiation   | 5     | 0.0035  | MGST3, CYP2F2, UGT2B34, CYP2B10, GSTM6                                                                                                                                                                                                                                                                                                                                                                                                                               |
| GOTERM_BP_FAT   |                                                                    | 6     | 0.0043  | WNT4, EVPL, ELF3, SPRR1A, SIX1, KRT4<br>MUG1, CADM1, ADCY8, FAM3B, F2RL1, CXADR, WNT4, ST3GAL5, LRRC52, TREH, TRPV6, CD200R3, GOLM1, UGT8A, CLCA3, SLC22A23, TIMD2, IGFALS, CERCAM, CWH43, CHST8, EMP2, PAMR1, PSAPL1, IGSF11, FNDC5, MSLN, ITGB6, ENTPD8, ABCD3, CLEC2E, SLC39A4, HGFAC, FAM55D, GABRP, MUC1, HAVCR1, MUC20, OPN1MW, FZD5, SECTM1B, TNFSF10, TMEM117, P2RX6, TFRC, CDON, SLC5A9, LIPH,                                                              |
| UP_SEQ_FEATURE  | glycosylation site:N-linked (GlcNAc...)                            | 49    | 0.0048  | GM7298, UTS2R<br>CADM1, ADCY8, F2RL1, RNF186, CXADR, ANK, ST3GAL5, KCNK5, LRRC52, TRPV6, TREH, CD200R3, GOLM1, PGAP2, UGT8A, NOXA1, TIMD2, SLC22A23, MPP6, BCL2L13, CYP2B10, SLC26A4, CWH43, NAPEPLD, FER1L4, CHST8, PPM1L, SLC27A2, EMP2, STEAP1, BID, CYP2F2, IGSF11, FNDC5, CKMT1, ITGB6, MSLN, ENTPD8, ABCD3, CLEC2E, SLC39A4, GABRP, MUC1, HAVCR1, OPN1MW, MUC20, KKR9, RGNF, SECTM1B, CLDN10A, FZD5, RGS9BP, GJB2, MGST3, ADI1, TMEM117, TNFSF10, P2RX6, TFRC, |
| SP_PIR_KEYWORDS | membrane                                                           | 66    | 0.0074  | AU042651, CDON, LIPH, SLC5A9, UTS2R, PLA2G4B, PDZK1                                                                                                                                                                                                                                                                                                                                                                                                                  |
| SP_PIR_KEYWORDS | peroxisome                                                         | 5     | 0.0114  | FNDC5, NUDT19, ABCD3, SLC27A2, DDO                                                                                                                                                                                                                                                                                                                                                                                                                                   |
| GOTERM_CC_FAT   | GO:0005777~peroxisome                                              | 5     | 0.0159  | FNDC5, NUDT19, ABCD3, SLC27A2, DDO                                                                                                                                                                                                                                                                                                                                                                                                                                   |
| GOTERM_CC_FAT   | GO:0042579~microbody                                               | 5     | 0.0159  | FNDC5, NUDT19, ABCD3, SLC27A2, DDO                                                                                                                                                                                                                                                                                                                                                                                                                                   |
| UP_SEQ_FEATURE  | domain:Ig-like V-type                                              | 5     | 0.0192  | IGSF11, HAVCR1, CADM1, TIMD2, CD200R3<br>CADM1, F2RL1, CXADR, ANK, IGSF11, FNDC5, ITGB6, ENTPD8, LRRC52, CLEC2E, TRPV6, SLC39A4, CD200R3, GABRP, MUC1, HAVCR1, TIMD2, OPN1MW, SECTM1B, FZD5, CLDN10A, RGS9BP, GJB2,                                                                                                                                                                                                                                                  |
| UP_SEQ_FEATURE  | topological domain:Extracellular                                   | 32    | 0.0192  | SLC26A4, TNFSF10, P2RX6, TFRC, CDON, FER1L4, SLC5A9, PPM1L, UTS2R                                                                                                                                                                                                                                                                                                                                                                                                    |
| UP_SEQ_FEATURE  | region of interest:Rod-like helical tail                           | 2     | 0.0195  | KRT19, KRT23                                                                                                                                                                                                                                                                                                                                                                                                                                                         |
| GOTERM_CC_FAT   | GO:0005911~cell-cell junction                                      | 6     | 0.0224  | EVPL, CADM1, CGN, CXADR, CLDN10A, GJB2                                                                                                                                                                                                                                                                                                                                                                                                                               |
| UP_SEQ_FEATURE  | region of interest:Head                                            | 4     | 0.0280  | KRT19, CGN, KRT4, KRT23                                                                                                                                                                                                                                                                                                                                                                                                                                              |
| KEGG_PATHWAY    | mmu00982:Drug metabolism                                           | 4     | 0.0346  | MGST3, UGT2B34, CYP2B10, GSTM6                                                                                                                                                                                                                                                                                                                                                                                                                                       |
| GOTERM_CC_FAT   | GO:0005903~brush border                                            | 3     | 0.0416  | SLC9A2, TREH, PDZK1<br>CADM1, ADCY8, F2RL1, CXADR, IGSF11, ANK, FNDC5, ST3GAL5, ITGB6, ENTPD8, LRRC52, CLEC2E, TRPV6, SLC39A4, CD200R3, GOLM1, GABRP, MUC1, HAVCR1, TIMD2, OPN1MW, SECTM1B, FZD5, CLDN10A, RGS9BP, GJB2, SLC26A4, TNFSF10, P2RX6, TFRC, FER1L4, CDON, CHST8, SLC5A9, PPM1L,                                                                                                                                                                          |
| UP_SEQ_FEATURE  | topological domain:Cytoplasmic                                     | 37    | 0.0437  | UTS2R, SLC27A2                                                                                                                                                                                                                                                                                                                                                                                                                                                       |
| GOTERM_BP_FAT   | GO:0006811~ion transport<br>mmu00500:Starch and sucrose metabolism | 12    | 0.0452  | SLC26A4, ANK, P2RX6, CLCA3, SLC22A23, KCNK5, SLC9A2, SLC5A9, TRPV6, SLC39A4, STEAP1, GABRP                                                                                                                                                                                                                                                                                                                                                                           |
| KEGG_PATHWAY    |                                                                    | 3     | 0.0462  | UGT2B34, TREH, PYGB                                                                                                                                                                                                                                                                                                                                                                                                                                                  |
| KEGG_PATHWAY    | mmu04210:Apoptosis                                                 | 4     | 0.0502  | BID, IRAK4, PRKAR2B, TNFSF10                                                                                                                                                                                                                                                                                                                                                                                                                                         |
| GOTERM_BP_FAT   | GO:0016202~regulation of striated muscle tissue development        | 3     | 0.0514  | CDON, CXADR, HDAC9                                                                                                                                                                                                                                                                                                                                                                                                                                                   |
| INTERPRO        | IPR007125:Histone core                                             | 3     | 0.0519  | HIST1H4A, HIST1H2BE, HIST1H2BG, HIST1H4F, HIST1H4I, HIST1H3F                                                                                                                                                                                                                                                                                                                                                                                                         |
| GOTERM_BP_FAT   | GO:0048634~regulation of muscle development                        | 3     | 0.0536  | CDON, CXADR, HDAC9                                                                                                                                                                                                                                                                                                                                                                                                                                                   |

|                 |                                                                                                    |    |        |                                                                                                                                                                                                                                                                                                                                                                                          |
|-----------------|----------------------------------------------------------------------------------------------------|----|--------|------------------------------------------------------------------------------------------------------------------------------------------------------------------------------------------------------------------------------------------------------------------------------------------------------------------------------------------------------------------------------------------|
| GOTERM_BP_FAT   | GO:0007155~cell adhesion                                                                           | 10 | 0.0553 | IGSF11, BARX2, CADM1, CDON, MSLN, ITGB6, IGFALS, CXADR, CLDN10A, CERCAM                                                                                                                                                                                                                                                                                                                  |
| GOTERM_BP_FAT   | GO:0022610~biological adhesion                                                                     | 10 | 0.0558 | IGSF11, BARX2, CADM1, CDON, MSLN, ITGB6, IGFALS, CXADR, CLDN10A, CERCAM                                                                                                                                                                                                                                                                                                                  |
| SP_PIR_KEYWORDS | Secreted                                                                                           | 20 | 0.0566 | MUG1, ACRBP, CLCA3, TUFT1, FAM3B, PAMR1, MUC20, PGLYRP1, IGFALS, PSAPL1, SECTM1B, DNASE1L2, CXADR, LOC100047816, WNT4, MSLN, LIPH, TFF3, GM7298, PYY, HGFC, FAM55D                                                                                                                                                                                                                       |
| INTERPRO        | IPR003599:Immunoglobulin subtype                                                                   | 7  | 0.0568 | IGSF11, HAVCR1, CADM1, CDON, TIMD2, CXADR, SECTM1B                                                                                                                                                                                                                                                                                                                                       |
| GOTERM_BP_FAT   | GO:0006323~DNA packaging                                                                           | 4  | 0.0577 | HIST1H4A, HIST1H2BE, HIST1H2BG, MUC20, HIST1H4F, HIST1H4I, HIST1H3F                                                                                                                                                                                                                                                                                                                      |
| SP_PIR_KEYWORDS | signal                                                                                             | 36 | 0.0583 | MUG1, CADM1, FAM3B, PAMR1, F2RL1, PGLYRP1, PSAPL1, CXADR, DNASE1L2, LOC100047816, IGSF11, FNDC5, WNT4, MSLN, ITGB6, LRRC52, TFF3, TREH, SLC39A4, HGFC, CD200R3, GABRP, FAM55D, MUC1, ACRBP, HAVCR1, CLCA3, UGT8A, TIMD2, MUC20, IGFALS, CERCAM, SECTM1B, FZD5, CDON, LIPH, GM7298, PYY                                                                                                   |
| INTERPRO        | IPR015394:Region of unknown function DUF1973                                                       | 2  | 0.0595 | CLCA4, CLCA3                                                                                                                                                                                                                                                                                                                                                                             |
| INTERPRO        | IPR004727:Calcium-activated chloride channel protein                                               | 2  | 0.0595 | CLCA4, CLCA3                                                                                                                                                                                                                                                                                                                                                                             |
| SP_PIR_KEYWORDS | ion transport                                                                                      | 10 | 0.0596 | P2RX6, CLCA3, SLC22A23, KCNK5, SLC9A2, SLC5A9, TRPV6, SLC39A4, STEAP1, GABRP                                                                                                                                                                                                                                                                                                             |
| SP_PIR_KEYWORDS | cell membrane                                                                                      | 23 | 0.0604 | MUC1, CADM1, NOXA1, TIMD2, MUC20, F2RL1, RGNF, SECTM1B, FZD5, CLDN10A, CXADR, GJB2, ADI1, IGSF11, TFRC, ENTPD8, MSLN, UTS2R, CLEC2E, TREH, TRPV6, SLC39A4, GABRP                                                                                                                                                                                                                         |
| SP_PIR_KEYWORDS | nucleosome core                                                                                    | 3  | 0.0604 | HIST1H4A, HIST1H2BE, HIST1H2BG, HIST1H4F, HIST1H4I, HIST1H3F                                                                                                                                                                                                                                                                                                                             |
| GOTERM_BP_FAT   | GO:0002009~morphogenesis of an epithelium                                                          | 5  | 0.0639 | COBL, WNT4, LMO4, SIX1, CAR2                                                                                                                                                                                                                                                                                                                                                             |
| GOTERM_CC_FAT   | GO:0016324~apical plasma membrane                                                                  | 4  | 0.0643 | SLC26A4, MUC1, MUC20, SLC39A4                                                                                                                                                                                                                                                                                                                                                            |
| GOTERM_CC_FAT   | GO:0043296~apical junction complex                                                                 | 4  | 0.0675 | EVPL, CGN, CXADR, CLDN10A                                                                                                                                                                                                                                                                                                                                                                |
| INTERPRO        | IPR013642:Chloride channel calcium-activated                                                       | 2  | 0.0677 | CLCA4, CLCA3                                                                                                                                                                                                                                                                                                                                                                             |
| UP_SEQ_FEATURE  | transmembrane region                                                                               | 50 | 0.0683 | CADM1, ADCY8, F2RL1, RNF186, CXADR, ANK, ST3GAL5, LRRC52, TRPV6, CD200R3, GOLM1, PGAP2, UGT8A, TIMD2, SLC22A23, BCL2L13, CWH43, SLC26A4, FER1L4, CHST8, PPM1L, EMP2, SLC27A2, STEAP1, IGSF11, FNDC5, ITGB6, ENTPD8, ABCD3, CLEC2E, SLC39A4, GABRP, MUC1, HAVCR1, OPN1MW, XKR9, CLDN10A, FZD5, SECTM1B, RGS9BP, GJB2, MGST3, TNFSF10, TMEM117, P2RX6, TFRC, AU042651, CDON, SLC5A9, UTS2R |
| UP_SEQ_FEATURE  | short sequence motif:Microbody targeting signal                                                    | 3  | 0.0691 | FNDC5, NUDT19, DDO                                                                                                                                                                                                                                                                                                                                                                       |
| GOTERM_CC_FAT   | GO:0016327~apicolateral plasma membrane                                                            | 4  | 0.0707 | EVPL, CGN, CXADR, CLDN10A                                                                                                                                                                                                                                                                                                                                                                |
| SMART           | SM00409:IG                                                                                         | 7  | 0.0711 | IGSF11, HAVCR1, CADM1, CDON, TIMD2, CXADR, SECTM1B                                                                                                                                                                                                                                                                                                                                       |
| GOTERM_BP_FAT   | GO:0060562~epithelial tube morphogenesis                                                           | 4  | 0.0722 | COBL, WNT4, LMO4, SIX1                                                                                                                                                                                                                                                                                                                                                                   |
| INTERPRO        | IPR004865:Sp100                                                                                    | 2  | 0.0759 | CSPRS, C130026121RIK                                                                                                                                                                                                                                                                                                                                                                     |
| GOTERM_CC_FAT   | GO:0005886~plasma membrane                                                                         | 35 | 0.0768 | CADM1, F2RL1, CXADR, IGSF11, ANK, MSLN, ITGB6, ENTPD8, CLEC2E, TRPV6, TREH, SLC39A4, CD200R3, GABRP, MUC1, NOXA1, TIMD2, MUC20, MPP6, RGNF, SECTM1B, FZD5, CLDN10A, GJB2, ADI1, SLC26A4, KRT19, P2RX6, EVPL, TFRC, CGN, CDON, UTS2R, PDZK1, PLA2G4B                                                                                                                                      |
| GOTERM_BP_FAT   | GO:0006470~protein amino acid dephosphorylation                                                    | 4  | 0.0769 | DUSP4, DUSP10, PTPN14, PPM1L                                                                                                                                                                                                                                                                                                                                                             |
| GOTERM_MF_FAT   | GO:0016765~transferase activity, transferring alkyl or aryl (other than methyl) groups             | 3  | 0.0769 | MGST3, MAT2A, GSTM6                                                                                                                                                                                                                                                                                                                                                                      |
| GOTERM_BP_FAT   | GO:0001838~embryonic epithelial tube formation                                                     | 3  | 0.0799 | COBL, WNT4, LMO4                                                                                                                                                                                                                                                                                                                                                                         |
| GOTERM_CC_FAT   | GO:0005792~microsome                                                                               | 5  | 0.0811 | MGST3, CYP2F2, IGFALS, CYP2B10, SLC27A2                                                                                                                                                                                                                                                                                                                                                  |
| GOTERM_BP_FAT   | GO:0042692~muscle cell differentiation                                                             | 4  | 0.0817 | WNT4, BARX2, CDON, CXADR                                                                                                                                                                                                                                                                                                                                                                 |
| INTERPRO        | IPR008343:MAP kinase phosphatase                                                                   | 2  | 0.0839 | DUSP4, DUSP10                                                                                                                                                                                                                                                                                                                                                                            |
| GOTERM_BP_FAT   | GO:0044242~cellular lipid catabolic process                                                        | 3  | 0.0851 | NAPEPLD, SLC27A2, PLA2G4B                                                                                                                                                                                                                                                                                                                                                                |
| GOTERM_CC_FAT   | GO:0042598~vesicular fraction                                                                      | 5  | 0.0891 | MGST3, CYP2F2, IGFALS, CYP2B10, SLC27A2                                                                                                                                                                                                                                                                                                                                                  |
| GOTERM_MF_FAT   | GO:0016782~transferase activity, transferring sulfur-containing groups                             | 3  | 0.0898 | OXCT1, CHST8, SULT1C2                                                                                                                                                                                                                                                                                                                                                                    |
| GOTERM_MF_FAT   | GO:0016811~hydrolase activity, acting on carbon-nitrogen (but not peptide) bonds, in linear amides | 3  | 0.0898 | ASPA, PGLYRP1, HDAC9                                                                                                                                                                                                                                                                                                                                                                     |
| INTERPRO        | IPR007677:DFNA5 protein                                                                            | 2  | 0.0919 | GSDMC2, GSDMC3                                                                                                                                                                                                                                                                                                                                                                           |
| GOTERM_MF_FAT   | GO:0019887~protein kinase regulator activity                                                       | 3  | 0.0924 | PRKAR2B, FGF13, PKIA                                                                                                                                                                                                                                                                                                                                                                     |
| GOTERM_CC_FAT   | GO:0005576~extracellular region                                                                    | 22 | 0.0929 | MUG1, ACRBP, CLCA3, TUFT1, FAM3B, MUC20, PAMR1, PGLYRP1, IGFALS, PSAPL1, SECTM1B, DNASE1L2, CXADR, LOC100047816, WNT4, TNFSF10, MSLN, LIPH, TFF3, GM7298, PYY, APOL7A, HGFC, FAM55D                                                                                                                                                                                                      |
| GOTERM_BP_FAT   | GO:0035148~tube lumen formation                                                                    | 3  | 0.0930 | COBL, WNT4, LMO4                                                                                                                                                                                                                                                                                                                                                                         |
| PIR_SUPERFAMILY | PIRSF002282:cytoskeletal keratin                                                                   | 3  | 0.0934 | KRT19, KRT4, KRT23                                                                                                                                                                                                                                                                                                                                                                       |
| SP_PIR_KEYWORDS | protein phosphatase                                                                                | 4  | 0.0959 | DUSP4, DUSP10, PTPN14, PPM1L                                                                                                                                                                                                                                                                                                                                                             |
| UP_SEQ_FEATURE  | domain:Tyrosine-protein phosphatase                                                                | 3  | 0.0982 | DUSP4, DUSP10, PTPN14                                                                                                                                                                                                                                                                                                                                                                    |

|                        |                                                                      |        |                  |                                                                               |
|------------------------|----------------------------------------------------------------------|--------|------------------|-------------------------------------------------------------------------------|
| GOTERM_MF_FAT          | GO:0017017~MAP kinase tyrosine/serine/threonine phosphatase activity | 2      | 0.0991           | DUSP4, DUSP10                                                                 |
| GOTERM_MF_FAT INTERPRO | GO:0033549~MAP kinase phosphatase activity<br>IPR009072:Histone-fold | 2<br>3 | 0.0991<br>0.0992 | DUSP4, DUSP10<br>HIST1H4A, HIST1H2BE, HIST1H2BG, HIST1H4F, HIST1H4I, HIST1H3F |
| GOTERM_BP_FAT          | GO:0014902~myotube differentiation                                   | 2      | 0.0994           | BARX2, CDON                                                                   |

**PTEN Loss Up ERG Up**

| Category        | Term                                    | Count | P-Value | Genes                                                                                                                                                                                                                                                                                                                                                                                                                                                                                                                                          |
|-----------------|-----------------------------------------|-------|---------|------------------------------------------------------------------------------------------------------------------------------------------------------------------------------------------------------------------------------------------------------------------------------------------------------------------------------------------------------------------------------------------------------------------------------------------------------------------------------------------------------------------------------------------------|
| SP_PIR_KEYWORDS | disulfide bond                          | 62    | 0.0000  | INSL3, OSMR, LOC100044702, CXCR2, FSTL1, REG3B, LOC100048770, CD47, CD44, CXCR4, SEMA3F, TGFB1, CSF3R, CLEC4D, REG3G, NAPSA, SIRPA, CLEC4N, OSM, IGHG, INHBA, CCR5, DARC, BACE2, LILRB4, H2-AA, SLPI, CAR9, ADAMTS4, TNFRSF22, CXCL1, ADORA2B, CSF2RB2, TNC, LRIG1, FPR2, CCL7, CCL6, GP49A, LOC641240, TNFRSF18, THBS2, SRGN, LY6C1, PLAT, SELP, LY2Z, BMP1, CFB, CHI3L1, H2-AB1, IGH-6, HGF, EMILIN2, FCGR3, TMRSS4, FBLN1, GPR35, FCGR2B, H2-EB1, CXCL15, CHRN1, CP, PRSS22                                                                 |
| UP_SEQ_FEATURE  | disulfide bond                          | 62    | 0.0000  | INSL3, OSMR, LOC100044702, CXCR2, FSTL1, REG3B, LOC100048770, CD47, CD44, CXCR4, SEMA3F, TGFB1, CSF3R, CLEC4D, REG3G, NAPSA, SIRPA, CLEC4N, OSM, IGHG, INHBA, CCR5, DARC, BACE2, LILRB4, H2-AA, SLPI, CAR9, ADAMTS4, TNFRSF22, CXCL1, ADORA2B, CSF2RB2, TNC, LRIG1, FPR2, CCL7, CCL6, GP49A, LOC641240, TNFRSF18, THBS2, SRGN, LY6C1, PLAT, SELP, LY2Z, BMP1, CFB, CHI3L1, H2-AB1, IGH-6, HGF, EMILIN2, FCGR3, TMRSS4, FBLN1, GPR35, FCGR2B, H2-EB1, CXCL15, CHRN1, CP, PRSS22                                                                 |
| SP_PIR_KEYWORDS | glycoprotein                            | 71    | 0.0000  | IER3, OSMR, CXCR2, FSTL1, CD53, LOC100048770, CD47, CD44, CXCR4, CH25H, SEMA3F, CSF3R, NIPAL1, CLEC4D, PILRA, BST2, GPR171, NAPSA, SIRPA, CLEC4N, OSM, IGHG, INHBA, CCR5, DARC, BACE2, LILRB4, H2-AA, CAR9, ADAMTS4, TNFRSF22, ADORA2B, CSF2RB2, TNC, LRIG1, FPR2, FXYS, GPRC5A, CCL7, SLC11A1, GLYCAM1, GP49A, LOC641240, TNFRSF18, FUT4, THBS2, QSOX1, SRGN, SPP1, LY6C1, PLAT, LMAN1L, SELP, BMP1, CFB, CHI3L1, CCDC80, H2-AB1, IGH-6, HGF, EMILIN2, FCGR3, TMRSS4, FBLN1, GPR35, SULF2, FCGR2B, H2-EB1, GPR114, CHRN1, CP, PRSS22, SLC15A3 |
| GOTERM_BP_FAT   | GO:0006954~inflammatory response        | 19    | 0.0000  | CD44, DARC, SAA1, CXCL15, IL1B, REG3G                                                                                                                                                                                                                                                                                                                                                                                                                                                                                                          |
| GOTERM_BP_FAT   | GO:0006955~immune response              | 25    | 0.0000  | CXCL1, LOC100044702, CCL7, CCL6, LOC100048770, SLC11A1, CD47, TMEM173, GP49A, LOC641240, IL1B, H2-T10, CLEC4D, CIITA, CFB, H2-AB1, IGH-6, CLEC4N, FCGR3, OSM, IGHG, FCGR2B, CCR5, LILRB4, CXCL15, H2-EB1, H2-AA                                                                                                                                                                                                                                                                                                                                |
| SP_PIR_KEYWORDS | signal                                  | 60    | 0.0000  | INSL3, OSMR, LOC100044702, FSTL1, LOC100048770, REG3B, CD47, CD44, SAA1, SEMA3F, TGFB1, CSF3R, REG3G, PILRA, SAA3, NAPSA, SIRPA, OSM, INHBA, BACE2, LILRB4, H2-AA, SLPI, CAR9, ADAMTS4, CXCL1, CSF2RB2, TNC, LRIG1, FXYS, CCL7, CCL6, GLYCAM1, GP49A, LOC641240, TNFRSF18, QSOX1, THBS2, SRGN, SPP1, LY6C1, PLAT, SELP, LMAN1L, LY2Z, BMP1, CFB, CHI3L1, CCDC80, H2-AB1, HGF, EMILIN2, FCGR3, FBLN1, FCGR2B, SULF2, H2-EB1, CXCL15, GPR114, CHRN1, CP, PRSS22                                                                                  |
| UP_SEQ_FEATURE  | glycosylation site:N-linked (GlcNac...) | 67    | 0.0000  | IER3, OSMR, CXCR2, FSTL1, CD53, LOC100048770, CD47, CD44, CXCR4, CH25H, SEMA3F, CSF3R, NIPAL1, CLEC4D, PILRA, BST2, GPR171, NAPSA, SIRPA, CLEC4N, OSM, IGHG, INHBA, DARC, BACE2, LILRB4, H2-AA, CAR9, ADAMTS4, TNFRSF22, ADORA2B, CSF2RB2, TNC, LRIG1, FPR2, GPRC5A, CCL7, SLC11A1, GLYCAM1, GP49A, LOC641240, TNFRSF18, FUT4, THBS2, QSOX1, SPP1, PLAT, SELP, LMAN1L, BMP1, CFB, CHI3L1, CCDC80, H2-AB1, IGH-6, HGF, EMILIN2, FCGR3, TMRSS4, FBLN1, GPR35, SULF2, FCGR2B, H2-EB1, GPR114, CHRN1, CP, PRSS22, SLC15A3                          |
| UP_SEQ_FEATURE  | signal peptide                          | 60    | 0.0000  | INSL3, OSMR, LOC100044702, FSTL1, LOC100048770, REG3B, CD47, CD44, SAA1, SEMA3F, TGFB1, CSF3R, REG3G, PILRA, SAA3, NAPSA, SIRPA, OSM, INHBA, BACE2, LILRB4, H2-AA, SLPI, CAR9, ADAMTS4, CXCL1, CSF2RB2, TNC, LRIG1, FXYS, CCL7, CCL6, GLYCAM1, GP49A, LOC641240, TNFRSF18, QSOX1, THBS2, SRGN, SPP1, LY6C1, PLAT, SELP, LMAN1L, LY2Z, BMP1, CFB, CHI3L1, CCDC80, H2-AB1, HGF, EMILIN2, FCGR3, FBLN1, FCGR2B, SULF2, H2-EB1, CXCL15, GPR114, CHRN1, CP, PRSS22                                                                                  |
| GOTERM_BP_FAT   | GO:0006952~defense response             | 23    | 0.0000  | CIITA, CXCL1, SELP, LY2Z, CFB, LOC100044702, SAA3, CCL7, FCGR3, REG3B, IGHG, SLC11A1, TMEM173, HIF1A, FCGR2B, CCR5, CD44, DARC, SAA1, CXCL15, IL1B, H2-AA, REG3G                                                                                                                                                                                                                                                                                                                                                                               |
| GOTERM_BP_FAT   | GO:0009611~response to wounding         | 20    | 0.0000  | CCR5, CD44, DARC, SAA1, CXCL15, IL1B, REG3G                                                                                                                                                                                                                                                                                                                                                                                                                                                                                                    |
| GOTERM_BP_FAT   | GO:0006935~chemotaxis                   | 13    | 0.0000  | S100A8, S100A9, LOC100044702, CXCR2, FPR2, CCL7, CCL6, FCGR3, CORO1A, SEMA3F, CXCL15, CSF3R, IL1B                                                                                                                                                                                                                                                                                                                                                                                                                                              |
| GOTERM_BP_FAT   | GO:0042330~taxis                        | 13    | 0.0000  | S100A8, S100A9, LOC100044702, CXCR2, FPR2, CCL7, CCL6, FCGR3, CORO1A, SEMA3F, CXCL15, CSF3R, IL1B                                                                                                                                                                                                                                                                                                                                                                                                                                              |
| SP_PIR_KEYWORDS | Secreted                                | 36    | 0.0000  | CXCL1, TNFRSF22, INSL3, S100A8, TNC, S100A9, LOC100044702, FSTL1, CCL7, CCL6, REG3B, SAA1, SEMA3F, TGFB1, TNFRSF18, IL1B, REG3G, QSOX1, SRGN, SPP1, PLAT, CFB, CHI3L1, CCDC80, SAA3, IGH-6, EMILIN2, OSM, INHBA, IGHG, FBLN1, FCGR2B, CXCL15, SLPI, CP, ADAMTS4                                                                                                                                                                                                                                                                                |
| GOTERM_CC_FAT   | GO:0044421~extracellular region part    | 26    | 0.0000  | CXCL1, TNC, LOC100044702, CCL7, CCL6, LOC100048770, SAA1, TGFB1, IL1B, QSOX1, SRGN, SPP1, PLAT, BMP1, CCDC80, SAA3, CHI3L1, IGH-6, EMILIN2, OSM, IGHG, FBLN1, SULF2, CXCL15, CP, ADAMTS4                                                                                                                                                                                                                                                                                                                                                       |
| GOTERM_CC_FAT   | GO:0005576~extracellular region         | 39    | 0.0000  | TNFRSF22, CXCL1, INSL3, TNC, LOC100044702, FSTL1, CCL7, CCL6, LOC100048770, REG3B, SAA1, SEMA3F, TGFB1, TNFRSF18, IL1B, REG3G, CASP1, QSOX1, THBS2, SRGN, SPP1, PLAT, BMP1, CFB, CHI3L1, SAA3, CCDC80, IGH-6, EMILIN2, OSM, INHBA, IGHG, FBLN1, FCGR2B, SULF2, CXCL15, SLPI, CP, ADAMTS4                                                                                                                                                                                                                                                       |
| GOTERM_CC_FAT   | GO:0005615~extracellular space          | 21    | 0.0000  | CXCL1, PLAT, BMP1, LOC100044702, SAA3, CHI3L1, IGH-6, CCL7, CCL6, OSM, LOC100048770, IGHG, SULF2, SAA1, TGFB1, CXCL15, IL1B, CP, QSOX1, SRGN, SPP1                                                                                                                                                                                                                                                                                                                                                                                             |

|                 |                                                                                                                                      |    |                                                                                                                                                                                                                                                                                                                                                                          |
|-----------------|--------------------------------------------------------------------------------------------------------------------------------------|----|--------------------------------------------------------------------------------------------------------------------------------------------------------------------------------------------------------------------------------------------------------------------------------------------------------------------------------------------------------------------------|
| KEGG_PATHWAY    | mmu04060:Cytokine-cytokine receptor interaction                                                                                      | 16 | 0.0000 CXCL1, OSMR, CSF2RB2, LOC100044702, CXCR2, HGF, CCL7, CCL6, OSM, INHBA, CCR5, CXCR4, CXCL15, TNFRSF18, CSF3R, IL1B                                                                                                                                                                                                                                                |
| UP_SEQ_FEATURE  | topological domain:Extracellular<br>GO:0045807~positive regulation of endocytosis                                                    | 43 | 0.0000 TNFRSF22, IER3, ADORA2B, CSF2RB2, OSMR, LRIG1, CXCR2, FPR2, CD53, FXYD5, GPRC5A, CD47, SLC11A1, TMEM173, CD44, CXCR4, GP49A, LOC641240, TNFRSF18, CSF3R, NIPAL1, MS4A8A, CLEC4D, PILRA, SELP, BST2, MS4A6D, TMC5, GPR171, H2-AB1, SIRPA, CLEC4N, FCGR3, TMPRSS4, GPR35, CCR5, FCGR2B, DARC, BACE2, H2-EB1, LILRB4, GPR114, H2-AA, CAR9, CHRN1                     |
| GOTERM_BP_FAT   | GO:0007626~locomotory behavior                                                                                                       | 13 | 0.0000 IL1B                                                                                                                                                                                                                                                                                                                                                              |
| GOTERM_BP_FAT   | GO:0050766~positive regulation of phagocytosis                                                                                       | 6  | 0.0000 IGHG, SLC11A1, CD47, FCGR2B, SIRPA, FCGR3                                                                                                                                                                                                                                                                                                                         |
| GOTERM_BP_FAT   | GO:0050900~leukocyte migration                                                                                                       | 7  | 0.0000 S100A8, CXCL15, LOC100044702, S100A9, CXCR2, FPR2, CCL7, CCL6, S100A8, S100A9, LOC100044702, CXCR2, FPR2, CCL7, CCL6, FCGR3, CORO1A, SEMA3F, CXCL15, CSF3R, IL1B                                                                                                                                                                                                  |
| GOTERM_BP_FAT   | GO:0050764~regulation of phagocytosis                                                                                                | 6  | 0.0000 IGHG, SLC11A1, CD47, FCGR2B, SIRPA, FCGR3                                                                                                                                                                                                                                                                                                                         |
| GOTERM_BP_FAT   | GO:0030595~leukocyte chemotaxis                                                                                                      | 6  | 0.0000 CORO1A, CXCL15, S100A9, IL1B, CSF3R, FCGR3                                                                                                                                                                                                                                                                                                                        |
| GOTERM_BP_FAT   | GO:0060326~cell chemotaxis                                                                                                           | 6  | 0.0000 CORO1A, CXCL15, S100A9, IL1B, CSF3R, FCGR3                                                                                                                                                                                                                                                                                                                        |
| GOTERM_BP_FAT   | GO:0002449~lymphocyte mediated immunity                                                                                              | 8  | 0.0000 LOC100048770, IGHG, SLC11A1, FCGR2B, CFB, H2-AA, IGH-6, FCGR3                                                                                                                                                                                                                                                                                                     |
| UP_SEQ_FEATURE  | topological domain:Cytoplasmic                                                                                                       | 46 | 0.0000 TNFRSF22, IER3, ADORA2B, CSF2RB2, OSMR, LRIG1, CXCR2, FPR2, CD53, FXYD5, GPRC5A, CD47, SLC11A1, TMEM173, CD44, CXCR4, GP49A, LOC641240, TNFRSF18, CSF3R, FUT4, NIPAL1, MS4A8A, CLEC4D, PILRA, SELP, BST2, MS4A6D, TMC5, GPR171, H2-AB1, SIRPA, CLEC4N, FCGR3, TMPRSS4, IGHG, GPR35, CCR5, FCGR2B, ATP2A3, DARC, BACE2, H2-EB1, LILRB4, GPR114, H2-AA, CAR9, CHRN1 |
| INTERPRO        | IPR003597:Immunoglobulin C1-set                                                                                                      | 8  | 0.0000 LOC100048770, IGHG, LOC641240, H2-EB1, H2-AA, H2-T10, H2-AB1, IGH-6, SIRPA                                                                                                                                                                                                                                                                                        |
| GOTERM_BP_FAT   | GO:0030100~regulation of endocytosis                                                                                                 | 7  | 0.0000 IGHG, SLC11A1, CD47, FCGR2B, IGH-6, SIRPA, FCGR3                                                                                                                                                                                                                                                                                                                  |
| INTERPRO        | IPR007110:Immunoglobulin-like                                                                                                        | 18 | 0.0000 PIRA11, FCGR4, LRIG1, IGH-6, H2-AB1, SIRPA, FCGR3, LOC100048770, IGHG, CD47, FCGR2B, GP49A, GO:0002526~acute inflammatory response                                                                                                                                                                                                                                |
| GOTERM_BP_FAT   | GO:0016477~cell migration                                                                                                            | 12 | 0.0000 REG3B, IGHG, SAA1, CFB, SAA3, IL1B, REG3G, FCGR3                                                                                                                                                                                                                                                                                                                  |
| GOTERM_BP_FAT   | GO:0060627~regulation of vesicle-mediated transport                                                                                  | 8  | 0.0000 PLAT, SELP, CORO1A, HIF1A, NAV1, CXCR4, SEMA3F, CXCL15, S100A9, IL1B, CSF3R, FCGR3                                                                                                                                                                                                                                                                                |
| GOTERM_BP_FAT   | GO:0002460~adaptive immune response based on somatic recombination of immune receptors built from immunoglobulin superfamily domains | 8  | 0.0000 LOC100048770, IGHG, SLC11A1, FCGR2B, CFB, H2-AA, IGH-6, FCGR3                                                                                                                                                                                                                                                                                                     |
| GOTERM_BP_FAT   | GO:0002250~adaptive immune response                                                                                                  | 8  | 0.0000 LOC100048770, IGHG, SLC11A1, FCGR2B, CFB, H2-AA, IGH-6, FCGR3                                                                                                                                                                                                                                                                                                     |
| GOTERM_BP_FAT   | GO:0019882~antigen processing and presentation                                                                                       | 8  | 0.0000 SLC11A1, FCGR2B, LOC641240, H2-EB1, H2-AA, H2-T10, H2-AB1, IGH-6, FCGR3                                                                                                                                                                                                                                                                                           |
| SMART           | SM00407:IgC1                                                                                                                         | 8  | 0.0000 LOC100048770, IGHG, LOC641240, H2-EB1, H2-AA, H2-T10, H2-AB1, IGH-6, SIRPA                                                                                                                                                                                                                                                                                        |
| GOTERM_BP_FAT   | GO:0002443~leukocyte mediated immunity                                                                                               | 8  | 0.0000 LOC100048770, IGHG, SLC11A1, FCGR2B, CFB, H2-AA, IGH-6, FCGR3                                                                                                                                                                                                                                                                                                     |
| GOTERM_BP_FAT   | GO:0048002~antigen processing and presentation of peptide antigen                                                                    | 6  | 0.0000 SLC11A1, FCGR2B, LOC641240, H2-EB1, H2-AA, H2-AB1, FCGR3                                                                                                                                                                                                                                                                                                          |
| GOTERM_BP_FAT   | GO:0002252~immune effector process                                                                                                   | 9  | 0.0000 LOC100048770, IGHG, SLC11A1, CD47, FCGR2B, CFB, H2-AA, IGH-6, FCGR3                                                                                                                                                                                                                                                                                               |
| INTERPRO        | IPR013783:Immunoglobulin-like fold                                                                                                   | 18 | 0.0000 SEMA3F, LOC641240, LILRB4, H2-EB1, LILRA6, H2-AA, H2-T10, LOC100047053, PILRA                                                                                                                                                                                                                                                                                     |
| SP_PIR_KEYWORDS | cytokine                                                                                                                             | 10 | 0.0000 OSM, CXCL1, BMP1, S100A8, CXCL15, LOC100044702, IL1B, CCL7, CCL6, SPP1                                                                                                                                                                                                                                                                                            |
| INTERPRO        | IPR003006:Immunoglobulin/major histocompatibility complex, conserved site                                                            | 8  | 0.0000 LOC100048770, IGHG, LOC641240, H2-EB1, H2-AA, H2-T10, H2-AB1, IGH-6, SIRPA                                                                                                                                                                                                                                                                                        |
| GOTERM_BP_FAT   | GO:0016064~immunoglobulin mediated immune response                                                                                   | 7  | 0.0000 LOC100048770, IGHG, FCGR2B, CFB, H2-AA, IGH-6, FCGR3                                                                                                                                                                                                                                                                                                              |
| GOTERM_BP_FAT   | GO:0051050~positive regulation of transport                                                                                          | 9  | 0.0000 IGHG, SLC11A1, CD47, ADORA2B, FCGR2B, IGH-6, CASP1, SIRPA, FCGR3                                                                                                                                                                                                                                                                                                  |
| SP_PIR_KEYWORDS | heterodimer                                                                                                                          | 6  | 0.0000 S100A8, LOC641240, S100A9, H2-EB1, H2-AA, H2-AB1, HGF                                                                                                                                                                                                                                                                                                             |
| GOTERM_BP_FAT   | GO:0019724~B cell mediated immunity                                                                                                  | 7  | 0.0000 LOC100048770, IGHG, FCGR2B, CFB, H2-AA, IGH-6, FCGR3                                                                                                                                                                                                                                                                                                              |
| GOTERM_BP_FAT   | GO:0048870~cell motility                                                                                                             | 12 | 0.0000 PLAT, SELP, CORO1A, HIF1A, NAV1, CXCR4, SEMA3F, CXCL15, S100A9, IL1B, CSF3R, FCGR3                                                                                                                                                                                                                                                                                |
| GOTERM_BP_FAT   | GO:0051674~localization of cell                                                                                                      | 12 | 0.0000 PLAT, SELP, CORO1A, HIF1A, NAV1, CXCR4, SEMA3F, CXCL15, S100A9, IL1B, CSF3R, FCGR3                                                                                                                                                                                                                                                                                |
| GOTERM_BP_FAT   | GO:0048584~positive regulation of response to stimulus                                                                               | 10 | 0.0000 IGHG, SLC11A1, CD47, CDKN2A, ADORA2B, CFB, H2-AA, IL1B, IGH-6, FCGR3                                                                                                                                                                                                                                                                                              |
| GOTERM_MF_FAT   | GO:0030246~carbohydrate binding                                                                                                      | 12 | 0.0000 REG3B, SELP, LMAN1L, KLRA17, CD44, CCDC80, FSTL1, CLEC4D, REG3G, THBS2, CLEC4N, CCL7, S100A8, S100A9, LOC100044702, CXCR2, FPR2, CCL7, CCL6, FCGR3, OSM, CORO1A, SEMA3F, CXCL15, IL1B, CSF3R                                                                                                                                                                      |
| GOTERM_BP_FAT   | GO:0007610~behavior                                                                                                                  | 14 | 0.0000 IL1B, CSF3R                                                                                                                                                                                                                                                                                                                                                       |
| SP_PIR_KEYWORDS | inflammatory response                                                                                                                | 7  | 0.0000 REG3B, CXCL1, CXCL15, LOC100044702, IL1B, REG3G, CCL7                                                                                                                                                                                                                                                                                                             |

|                 |                                                                                                      |    |        |                                                                                           |
|-----------------|------------------------------------------------------------------------------------------------------|----|--------|-------------------------------------------------------------------------------------------|
| GOTERM_BP_FAT   | GO:0002478~antigen processing and presentation of exogenous peptide antigen                          | 5  | 0.0000 | FCGR2B, LOC641240, H2-EB1, H2-AA, H2-AB1, FCGR3                                           |
| GOTERM_BP_FAT   | GO:0050865~regulation of cell activation                                                             | 9  | 0.0000 | SELP, CDKN1A, CORO1A, CDKN2A, PLEK, ADORA2B, FCGR2B, H2-AA, IGH-6                         |
| GOTERM_BP_FAT   | GO:0006928~cell motion                                                                               | 13 | 0.0000 | PLAT, SELP, S100A9, SIRPA, FCGR3, CORO1A, HIF1A, NAV1, CXCR4, SEMA3F, CXCL15, CSF3R, IL1B |
| GOTERM_BP_FAT   | GO:0006909~phagocytosis                                                                              | 6  | 0.0000 | IGHG, SLC11A1, CD47, FCGR2B, SIRPA, FCGR3                                                 |
| GOTERM_BP_FAT   | GO:0002684~positive regulation of immune system process                                              | 10 | 0.0001 | IGHG, SELP, SLC11A1, CDKN1A, CORO1A, ADORA2B, CFB, H2-AA, IGH-6, FCGR3                    |
| GOTERM_CC_FAT   | GO:0009986~cell surface                                                                              | 12 | 0.0001 | AA                                                                                        |
| GOTERM_BP_FAT   | GO:0051130~positive regulation of cellular component organization                                    | 8  | 0.0001 | IGHG, SLC11A1, CD47, PLEK, FCGR2B, IGH-6, SIRPA, FCGR3                                    |
| GOTERM_MF_FAT   | GO:0005125~cytokine activity                                                                         | 9  | 0.0001 | OSM, CXCL1, BMP1, CXCL15, LOC100044702, IL1B, CCL7, CCL6, SPP1                            |
| INTERPRO        | IPR013151:Immunoglobulin                                                                             | 9  | 0.0001 | LOC100048770, PIRA11, FCGR2B, GP49A, PIRA4, SEMA3F, LILRB4, FCGR4, LILRA6, LRIG1, FCGR3   |
| GOTERM_BP_FAT   | GO:0019884~antigen processing and presentation of exogenous antigen                                  | 5  | 0.0001 | FCGR2B, LOC641240, H2-EB1, H2-AA, H2-AB1, FCGR3                                           |
| GOTERM_BP_FAT   | GO:0006953~acute-phase response                                                                      | 5  | 0.0001 | REG3B, SAA1, SAA3, IL1B, REG3G                                                            |
| KEGG_PATHWAY    | mmu05322:Systemic lupus erythematosus                                                                | 8  | 0.0001 | LOC100048770, IGHG, FCGR2B, LOC641240, H2-EB1, FCGR4, H2-AA, H2-AB1, FCGR3                |
| SP_PIR_KEYWORDS | transmembrane protein                                                                                | 12 | 0.0002 | CHRNB1                                                                                    |
| INTERPRO        | IPR001811:Small chemokine, interleukin-8-like                                                        | 5  | 0.0002 | CXCL1, CXCL15, LOC100044702, CCL7, CCL6                                                   |
| GOTERM_BP_FAT   | GO:0050867~positive regulation of cell activation                                                    | 7  | 0.0002 | SELP, CDKN1A, CORO1A, PLEK, ADORA2B, H2-AA, IGH-6                                         |
| GOTERM_MF_FAT   | GO:0008009~chemokine activity                                                                        | 5  | 0.0002 | CXCL1, CXCL15, LOC100044702, CCL7, CCL6                                                   |
| GOTERM_BP_FAT   | GO:0032101~regulation of response to external stimulus                                               | 7  | 0.0002 | IGHG, SELP, CD47, PLEK, ADORA2B, FCGR2B, FCGR3                                            |
| GOTERM_MF_FAT   | GO:0042379~chemokine receptor binding                                                                | 5  | 0.0002 | CXCL1, CXCL15, LOC100044702, CCL7, CCL6                                                   |
| GOTERM_BP_FAT   | GO:0006911~phagocytosis, engulfment                                                                  | 4  | 0.0002 | IGHG, FCGR2B, SIRPA, FCGR3                                                                |
| GOTERM_BP_FAT   | GO:0002495~antigen processing and presentation of peptide antigen via MHC class II                   | 4  | 0.0003 | FCGR2B, LOC641240, H2-EB1, H2-AA, H2-AB1                                                  |
| GOTERM_BP_FAT   | GO:0019886~antigen processing and presentation of exogenous peptide antigen via MHC class II         | 4  | 0.0003 | FCGR2B, LOC641240, H2-EB1, H2-AA, H2-AB1                                                  |
| SMART           | SM00199:SCY                                                                                          | 5  | 0.0003 | CXCL1, CXCL15, LOC100044702, CCL7, CCL6                                                   |
| KEGG_PATHWAY    | mmu04672:Intestinal immune network for IgA production                                                | 6  | 0.0003 | LOC100048770, IGHG, CXCR4, LOC641240, H2-EB1, H2-AA, H2-AB1                               |
| KEGG_PATHWAY    | mmu04640:Hematopoietic cell lineage                                                                  | 7  | 0.0003 | LOC100048770, IGHG, CD44, H2-EB1, H2-AA, IL1B, CSF3R                                      |
| GOTERM_BP_FAT   | GO:0030593~neutrophil chemotaxis                                                                     | 4  | 0.0003 | CXCL15, IL1B, CSF3R, FCGR3                                                                |
| SP_PIR_KEYWORDS | duplication                                                                                          | 7  | 0.0004 | LOC100048770, IGHG, FCGR2B, CFB, CSF2RB2, TNC, IGH-6                                      |
| GOTERM_CC_FAT   | GO:0009897~external side of plasma membrane                                                          | 9  | 0.0004 | LY6C1, SELP, CCR5, CD44, FCGR2B, LOC641240, TNFRSF18, H2-AA, H2-AB1, IGH-6                |
| SP_PIR_KEYWORDS | membrane                                                                                             | 63 | 0.0004 | EB1, GPR114, CHRNB1, PTPN11, SLC15A3, DRAM1, MGST1                                        |
| KEGG_PATHWAY    | mmu05330:Allograft rejection                                                                         | 6  | 0.0004 | LOC100048770, IGHG, LOC641240, H2-EB1, H2-AA, H2-T10, H2-AB1                              |
| UP_SEQ_FEATURE  | transmembrane region                                                                                 | 53 | 0.0004 | FCGR2B, CYP4F18, ATP2A3, H2-EB1, GPR114, CHRNB1, SLC15A3, DRAM1                           |
| KEGG_PATHWAY    | mmu05310:Asthma                                                                                      | 5  | 0.0005 | LOC100048770, IGHG, LOC641240, H2-EB1, H2-AA, H2-AB1                                      |
| INTERPRO        | IPR016186:C-type lectin-like                                                                         | 7  | 0.0005 | REG3B, SELP, KLRA17, CD44, CLEC4D, REG3G, CLEC4N                                          |
| GOTERM_BP_FAT   | GO:0002504~antigen processing and presentation of peptide or polysaccharide antigen via MHC class II | 4  | 0.0005 | FCGR2B, LOC641240, H2-EB1, H2-AA, H2-AB1                                                  |
| SP_PIR_KEYWORDS | calcium binding                                                                                      | 5  | 0.0005 | FBLN1, S100A8, TNC, S100A9, THBS2                                                         |
| GOTERM_MF_FAT   | GO:0019955~cytokine binding                                                                          | 6  | 0.0005 | CCR5, OSMR, CXCR4, CSF2RB2, CSF3R, CXCR2                                                  |
| SP_PIR_KEYWORDS | immune response                                                                                      | 8  | 0.0006 | TMEM173, GP49A, CFB, LOC641240, LILRB4, H2-EB1, H2-AA, H2-AB1, CLEC4D, CLEC4N             |
| PIR_SUPERFAMILY | PIRSF001980:Fc gamma receptor III                                                                    | 3  | 0.0008 | FCGR2B, FCGR4, FCGR3                                                                      |

|                 |                                                                           |    |        |                                                                                                                                                                                                                                                                                                                                                                                                                                                                           |
|-----------------|---------------------------------------------------------------------------|----|--------|---------------------------------------------------------------------------------------------------------------------------------------------------------------------------------------------------------------------------------------------------------------------------------------------------------------------------------------------------------------------------------------------------------------------------------------------------------------------------|
| SP_PIR_KEYWORDS | acute phase                                                               | 4  | 0.0008 | REG3B, SAA1, SAA3, REG3G                                                                                                                                                                                                                                                                                                                                                                                                                                                  |
| UP_SEQ_FEATURE  | sequence variant                                                          | 11 | 0.0009 | LOC100048770, IGHG, SLC11A1, CDKN2A, CCR5, CD44, FCGR2B, DARC, IGH-6, MS4A8A, SIRPA                                                                                                                                                                                                                                                                                                                                                                                       |
| GOTERM_BP_FAT   | GO:0050729~positive regulation of inflammatory response                   | 4  | 0.0010 | IGHG, CD47, ADORA2B, FCGR3                                                                                                                                                                                                                                                                                                                                                                                                                                                |
| GOTERM_BP_FAT   | GO:0001817~regulation of cytokine production                              | 7  | 0.0010 | SLC11A1, CEBPB, ADORA2B, IL1B, CASP1, SRGN, FCGR3                                                                                                                                                                                                                                                                                                                                                                                                                         |
| KEGG_PATHWAY    | mmu05320:Autoimmune thyroid disease                                       | 6  | 0.0012 | LOC100048770, IGHG, LOC641240, H2-EB1, H2-AA, H2-T10, H2-AB1                                                                                                                                                                                                                                                                                                                                                                                                              |
| GOTERM_BP_FAT   | GO:0050727~regulation of inflammatory response                            | 5  | 0.0012 | IGHG, CD47, ADORA2B, FCGR2B, FCGR3                                                                                                                                                                                                                                                                                                                                                                                                                                        |
| GOTERM_MF_FAT   | GO:0042277~peptide binding                                                | 7  | 0.0014 | CCR5, CXCR4, LOC641240, PPIC, H2-AA, CXCR2, H2-AB1, FPR2                                                                                                                                                                                                                                                                                                                                                                                                                  |
| GOTERM_CC_FAT   | GO:0042571~immunoglobulin complex, circulating                            | 3  | 0.0015 | LOC100048770, IGHG, IGH-6                                                                                                                                                                                                                                                                                                                                                                                                                                                 |
| SP_PIR_KEYWORDS | cell membrane                                                             | 26 | 0.0015 | CAR9, GPR114, CHRN1                                                                                                                                                                                                                                                                                                                                                                                                                                                       |
| GOTERM_BP_FAT   | GO:0002694~regulation of leukocyte activation                             | 7  | 0.0017 | CDKN1A, CORO1A, CDKN2A, ADORA2B, FCGR2B, H2-AA, IGH-6                                                                                                                                                                                                                                                                                                                                                                                                                     |
| GOTERM_BP_FAT   | GO:0001810~regulation of type I hypersensitivity                          | 3  | 0.0018 | IGHG, FCGR2B, FCGR3                                                                                                                                                                                                                                                                                                                                                                                                                                                       |
| SP_PIR_KEYWORDS | Lectin                                                                    | 7  | 0.0020 | REG3B, SELP, LMAN1L, KLRA17, CLEC4D, REG3G, CLEC4N                                                                                                                                                                                                                                                                                                                                                                                                                        |
| GOTERM_MF_FAT   | GO:0030291~protein serine/threonine kinase inhibitor activity             | 3  | 0.0020 | CDKN1A, CDKN2A, PKIG                                                                                                                                                                                                                                                                                                                                                                                                                                                      |
| INTERPRO        | IPRO14745:MHC class II, alpha/beta chain, N-terminal                      | 3  | 0.0021 | LOC641240, H2-EB1, H2-AA, H2-AB1                                                                                                                                                                                                                                                                                                                                                                                                                                          |
| SP_PIR_KEYWORDS | transmembrane                                                             | 58 | 0.0021 | IER3, KLRA17, OSMR, CXCR2, CD53, CD47, TMEM173, CD44, CXCR4, CH25H, CSF3R, NIPAL1, MS4A8A, CLEC4D, PILRA, BST2, MS4A6D, GPR171, SIRPA, CLEC4N, IGHG, CCR5, DARC, BACE2, LILRB4, H2-AA, CAR9, TNFRSF22, ADORA2B, CSF2RB2, IFITM2, LRIG1, LOC100044439, FPR2, FYD5, GPRC5A, SLC11A1, GP49A, LOC641240, IFITM6, TNFRSF18, FUT4, H2-T10, QSOX1, SOAT1, SELP, TMC5, FCGR4, H2-AB1, IGH-6, FCGR3, TMRSS4, GPR35, FCGR2B, CYP4F18, ATP2A3, H2-EB1, GPR114, CHRN1, SLC15A3, DRAM1 |
| GOTERM_BP_FAT   | GO:0060341~regulation of cellular localization                            | 7  | 0.0021 | OSM, CDKN2A, ADORA2B, PKIG, IL1B, CASP1, SRGN                                                                                                                                                                                                                                                                                                                                                                                                                             |
| INTERPRO        | IPRO01304:C-type lectin                                                   | 6  | 0.0022 | REG3B, SELP, KLRA17, CLEC4D, REG3G, CLEC4N                                                                                                                                                                                                                                                                                                                                                                                                                                |
| GOTERM_BP_FAT   | GO:0030888~regulation of B cell proliferation                             | 4  | 0.0023 | CDKN1A, CDKN2A, FCGR2B, IGH-6                                                                                                                                                                                                                                                                                                                                                                                                                                             |
| SP_PIR_KEYWORDS | Immunoglobulin domain                                                     | 11 | 0.0025 | LOC100048770, IGHG, CD47, FCGR2B, GP49A, SEMA3F, LILRB4, LRIG1, CSF3R, IGH-6, SIRPA, FCGR3                                                                                                                                                                                                                                                                                                                                                                                |
| GOTERM_MF_FAT   | GO:0005529~sugar binding                                                  | 7  | 0.0026 | REG3B, SELP, LMAN1L, KLRA17, CLEC4D, REG3G, CLEC4N                                                                                                                                                                                                                                                                                                                                                                                                                        |
| GOTERM_BP_FAT   | GO:0042325~regulation of phosphorylation                                  | 9  | 0.0027 | OSM, SLC11A1, CDKN1A, CDKN2A, SOCS3, PKIG, IL1B, IGH-6, HGF                                                                                                                                                                                                                                                                                                                                                                                                               |
| GOTERM_BP_FAT   | GO:0002455~humoral immune response mediated by circulating immunoglobulin | 4  | 0.0029 | LOC100048770, IGHG, CFB, IGH-6                                                                                                                                                                                                                                                                                                                                                                                                                                            |
| SP_PIR_KEYWORDS | cell adhesion                                                             | 10 | 0.0029 | SELP, CD47, GLYCAM1, CD44, TNC, TGFBI, CSF3R, EMILIN2, THBS2, SPP1                                                                                                                                                                                                                                                                                                                                                                                                        |
| INTERPRO        | IPRO01089:Small chemokine, C-X-C                                          | 3  | 0.0031 | CXCL1, CXCL15, LOC100044702                                                                                                                                                                                                                                                                                                                                                                                                                                               |
| SP_PIR_KEYWORDS | immunoglobulin c region                                                   | 3  | 0.0032 | LOC100048770, IGHG, IGH-6                                                                                                                                                                                                                                                                                                                                                                                                                                                 |
| SP_PIR_KEYWORDS | mhc ii                                                                    | 3  | 0.0032 | LOC641240, H2-EB1, H2-AA, H2-AB1                                                                                                                                                                                                                                                                                                                                                                                                                                          |
| GOTERM_CC_FAT   | GO:0042613~MHC class II protein complex                                   | 3  | 0.0032 | LOC641240, H2-EB1, H2-AA, H2-AB1                                                                                                                                                                                                                                                                                                                                                                                                                                          |
| GOTERM_MF_FAT   | GO:0003823~antigen binding                                                | 5  | 0.0032 | LOC100048770, IGHG, LOC641240, H2-AA, H2-AB1, IGH-6                                                                                                                                                                                                                                                                                                                                                                                                                       |
| GOTERM_BP_FAT   | GO:0019220~regulation of phosphate metabolic process                      | 9  | 0.0034 | OSM, SLC11A1, CDKN1A, CDKN2A, SOCS3, PKIG, IL1B, IGH-6, HGF                                                                                                                                                                                                                                                                                                                                                                                                               |
| GOTERM_BP_FAT   | GO:0051174~regulation of phosphorus metabolic process                     | 9  | 0.0034 | OSM, SLC11A1, CDKN1A, CDKN2A, SOCS3, PKIG, IL1B, IGH-6, HGF                                                                                                                                                                                                                                                                                                                                                                                                               |
| KEGG_PATHWAY    | mmu05416:Viral myocarditis                                                | 6  | 0.0038 | LOC100048770, IGHG, LOC641240, H2-EB1, H2-AA, H2-T10, H2-AB1                                                                                                                                                                                                                                                                                                                                                                                                              |
| KEGG_PATHWAY    | mmu05332:Graft-versus-host disease                                        | 5  | 0.0038 | LOC641240, H2-EB1, H2-AA, IL1B, H2-T10, H2-AB1                                                                                                                                                                                                                                                                                                                                                                                                                            |
| KEGG_PATHWAY    | mmu04062:Chemokine signaling pathway                                      | 8  | 0.0039 | CXCL1, CCR5, CXCR4, CXCL15, LOC100044702, CXCR2, CCL7, CCL6                                                                                                                                                                                                                                                                                                                                                                                                               |
| SMART           | SM00034:CLECT                                                             | 6  | 0.0039 | REG3B, SELP, KLRA17, CLEC4D, REG3G, CLEC4N                                                                                                                                                                                                                                                                                                                                                                                                                                |
| GOTERM_BP_FAT   | GO:0032103~positive regulation of response to external stimulus           | 4  | 0.0040 | IGHG, CD47, ADORA2B, FCGR3                                                                                                                                                                                                                                                                                                                                                                                                                                                |
| SP_PIR_KEYWORDS | Pyrrolidone carboxylic acid                                               | 4  | 0.0042 | CD47, CD44, HGF, CCL7                                                                                                                                                                                                                                                                                                                                                                                                                                                     |
| GOTERM_BP_FAT   | GO:0050670~regulation of lymphocyte proliferation                         | 5  | 0.0043 | CDKN1A, CORO1A, CDKN2A, FCGR2B, IGH-6                                                                                                                                                                                                                                                                                                                                                                                                                                     |
| GOTERM_BP_FAT   | GO:0032944~regulation of mononuclear cell proliferation                   | 5  | 0.0043 | CDKN1A, CORO1A, CDKN2A, FCGR2B, IGH-6                                                                                                                                                                                                                                                                                                                                                                                                                                     |
| GOTERM_BP_FAT   | GO:0045859~regulation of protein kinase activity                          | 7  | 0.0044 | SLC11A1, CDKN1A, CDKN2A, PKIG, IL1B, IGH-6, HGF                                                                                                                                                                                                                                                                                                                                                                                                                           |
| GOTERM_BP_FAT   | GO:0010324~membrane invagination                                          | 7  | 0.0046 | IGHG, SLC11A1, CD47, DAB2, FCGR2B, SIRPA, FCGR3                                                                                                                                                                                                                                                                                                                                                                                                                           |
| GOTERM_BP_FAT   | GO:0006897~endocytosis                                                    | 7  | 0.0046 | IGHG, SLC11A1, CD47, DAB2, FCGR2B, SIRPA, FCGR3                                                                                                                                                                                                                                                                                                                                                                                                                           |
| GOTERM_BP_FAT   | GO:0070663~regulation of leukocyte proliferation                          | 5  | 0.0047 | CDKN1A, CORO1A, CDKN2A, FCGR2B, IGH-6                                                                                                                                                                                                                                                                                                                                                                                                                                     |

|                 |                                                                                                                                                    |    |                                                                                                                                                                                                                                                                                                                           |
|-----------------|----------------------------------------------------------------------------------------------------------------------------------------------------|----|---------------------------------------------------------------------------------------------------------------------------------------------------------------------------------------------------------------------------------------------------------------------------------------------------------------------------|
| SP_PIR_KEYWORDS | zymogen                                                                                                                                            | 7  | 0.0047 PLAT, BMP1, CFB, BACE2, NAPSA, CASP1, ADAMTS4                                                                                                                                                                                                                                                                      |
| GOTERM_MF_FAT   | GO:0004175~endopeptidase activity<br>mmu04621:NOD-like receptor signaling pathway                                                                  | 10 | 0.0047 PLAT, BMP1, CFB, BACE2, HGF, NAPSA, CASP1, PRSS22, ADAMTS4, TMPRSS4                                                                                                                                                                                                                                                |
| KEGG_PATHWAY    | GO:0002883~regulation of hypersensitivity                                                                                                          | 5  | 0.0048 CXCL1, IL1B, NAIP1, CASP1, CCL7                                                                                                                                                                                                                                                                                    |
| GOTERM_BP_FAT   | GO:0006910~phagocytosis, recognition                                                                                                               | 3  | 0.0049 IGHG, FCGR2B, FCGR3                                                                                                                                                                                                                                                                                                |
| GOTERM_BP_FAT   | GO:0002864~regulation of acute inflammatory response to antigenic stimulus                                                                         | 3  | 0.0049 IGHG, SIRPA, FCGR3                                                                                                                                                                                                                                                                                                 |
| GOTERM_BP_FAT   | IPRO18048:Small chemokine, C-X-C, conserved site                                                                                                   | 3  | 0.0051 CXCL1, CXCL15, LOC100044702                                                                                                                                                                                                                                                                                        |
| INTERPRO        | GO:0043549~regulation of kinase activity                                                                                                           | 7  | 0.0051 SLC11A1, CDKN1A, CDKN2A, PKIG, IL1B, IGH-6, HGF                                                                                                                                                                                                                                                                    |
| GOTERM_BP_FAT   | KEGG_PATHWAY<br>mmu04940:Type I diabetes mellitus                                                                                                  | 5  | 0.0051 LOC641240, H2-EB1, H2-AA, IL1B, H2-T10, H2-AB1                                                                                                                                                                                                                                                                     |
| GOTERM_BP_FAT   | GO:0050778~positive regulation of immune response                                                                                                  | 6  | 0.0053 IGHG, SLC11A1, CFB, H2-AA, IGH-6, FCGR3                                                                                                                                                                                                                                                                            |
| GOTERM_CC_FAT   | GO:0019814~immunoglobulin complex                                                                                                                  | 3  | 0.0054 LOC100048770, IGHG, IGH-6                                                                                                                                                                                                                                                                                          |
| PIR_SUPERFAMILY | PIRSF001991:class II histocompatibility antigen                                                                                                    | 3  | 0.0055 LOC641240, H2-EB1, H2-AA, H2-AB1<br>TNFRSF22, IER3, GNA14, ADORA2B, OSMR, CXCR2, FPR2, GPRC5A, CD47, TMEM173, GLYCAM1, CD44, CXCR4, GP49A, LOC641240, TNFRSF18, H2-T10, MSN, LY6C1, SELP, BST2, GPR171, H2-AB1, IGH-6, SIRPA, FCGR3, IGHG, CORO1A, GPR35, RGS1, CCR5, FCGR2B, H2-EB1, LILRB4, GPR114, CAR9, H2-AA, |
| GOTERM_CC_FAT   | GO:0005886~plasma membrane                                                                                                                         | 38 | 0.0059 CHRN1B, PTPN11, CP                                                                                                                                                                                                                                                                                                 |
| GOTERM_BP_FAT   | GO:0051338~regulation of transferase activity                                                                                                      | 7  | 0.0061 SLC11A1, CDKN1A, CDKN2A, PKIG, IL1B, IGH-6, HGF                                                                                                                                                                                                                                                                    |
| SP_PIR_KEYWORDS | extracellular matrix                                                                                                                               | 7  | 0.0065 FBLN1, TNC, TGFBI, CCDC80, EMILIN2, ADAMTS4, SPP1                                                                                                                                                                                                                                                                  |
| GOTERM_BP_FAT   | GO:0007155~cell adhesion                                                                                                                           | 12 | 0.0065 SELP, CD47, GLYCAM1, PLEK, CD44, TNC, TGFBI, CSF3R, EMILIN2, SIRPA, THBS2, SPP1                                                                                                                                                                                                                                    |
| GOTERM_BP_FAT   | GO:0002886~regulation of myeloid leukocyte mediated immunity                                                                                       | 3  | 0.0066 IGHG, ADORA2B, FCGR3                                                                                                                                                                                                                                                                                               |
| GOTERM_BP_FAT   | GO:0022610~biological adhesion                                                                                                                     | 12 | 0.0066 SELP, CD47, GLYCAM1, PLEK, CD44, TNC, TGFBI, CSF3R, EMILIN2, SIRPA, THBS2, SPP1                                                                                                                                                                                                                                    |
| UP_SEQ_FEATURE  | domain:C-type lectin                                                                                                                               | 5  | 0.0067 REG3B, SELP, CLEC4D, REG3G, CLEC4N                                                                                                                                                                                                                                                                                 |
| GOTERM_BP_FAT   | GO:0051249~regulation of lymphocyte activation                                                                                                     | 6  | 0.0068 CDKN1A, CORO1A, CDKN2A, FCGR2B, H2-AA, IGH-6                                                                                                                                                                                                                                                                       |
| SP_PIR_KEYWORDS | inflammation                                                                                                                                       | 3  | 0.0076 S100A8, S100A9, IL1B                                                                                                                                                                                                                                                                                               |
| GOTERM_MF_FAT   | GO:0008233~peptidase activity                                                                                                                      | 12 | 0.0082 PLAT, BMP1, CFB, BACE2, SLPI, HGF, NAPSA, CASP1, PRSS22, CTLA2B, ADAMTS4, TMPRSS4                                                                                                                                                                                                                                  |
| GOTERM_MF_FAT   | GO:0004896~cytokine receptor activity                                                                                                              | 4  | 0.0084 OSMR, CSF2RB2, CSF3R, CXCR2                                                                                                                                                                                                                                                                                        |
| GOTERM_BP_FAT   | GO:0006469~negative regulation of protein kinase activity                                                                                          | 4  | 0.0085 CDKN1A, CDKN2A, PKIG, IL1B                                                                                                                                                                                                                                                                                         |
| GOTERM_BP_FAT   | GO:0033673~negative regulation of kinase activity                                                                                                  | 4  | 0.0085 CDKN1A, CDKN2A, PKIG, IL1B                                                                                                                                                                                                                                                                                         |
| INTERPRO        | IPRO18378:C-type lectin, conserved site                                                                                                            | 5  | 0.0086 REG3B, SELP, CLEC4D, REG3G, CLEC4N                                                                                                                                                                                                                                                                                 |
| GOTERM_BP_FAT   | GO:0002696~positive regulation of leukocyte activation                                                                                             | 5  | 0.0090 CDKN1A, CORO1A, ADORA2B, H2-AA, IGH-6                                                                                                                                                                                                                                                                              |
| GOTERM_BP_FAT   | GO:0002673~regulation of acute inflammatory response                                                                                               | 3  | 0.0095 IGHG, FCGR2B, FCGR3                                                                                                                                                                                                                                                                                                |
| GOTERM_BP_FAT   | GO:0002861~regulation of inflammatory response to antigenic stimulus                                                                               | 3  | 0.0095 IGHG, FCGR2B, FCGR3                                                                                                                                                                                                                                                                                                |
| GOTERM_BP_FAT   | GO:0051348~negative regulation of transferase activity                                                                                             | 4  | 0.0095 CDKN1A, CDKN2A, PKIG, IL1B                                                                                                                                                                                                                                                                                         |
| GOTERM_BP_FAT   | GO:0009617~response to bacterium                                                                                                                   | 6  | 0.0096 SLC11A1, CD47, LY2Z, CCR5, IL1B, IRG1                                                                                                                                                                                                                                                                              |
| GOTERM_MF_FAT   | GO:0004860~protein kinase inhibitor activity                                                                                                       | 3  | 0.0099 CDKN1A, CDKN2A, PKIG                                                                                                                                                                                                                                                                                               |
| GOTERM_BP_FAT   | GO:0006959~humoral immune response                                                                                                                 | 4  | 0.0100 LOC100048770, IGHG, CFB, IGH-6                                                                                                                                                                                                                                                                                     |
| GOTERM_CC_FAT   | GO:0042611~MHC protein complex                                                                                                                     | 4  | 0.0102 LOC641240, H2-EB1, H2-AA, H2-T10, H2-AB1                                                                                                                                                                                                                                                                           |
| GOTERM_BP_FAT   | GO:0050864~regulation of B cell activation                                                                                                         | 4  | 0.0105 CDKN1A, CDKN2A, FCGR2B, IGH-6                                                                                                                                                                                                                                                                                      |
| GOTERM_MF_FAT   | GO:0004857~enzyme inhibitor activity                                                                                                               | 7  | 0.0105 CDKN1A, CDKN2A, GM5483, PKIG, SLPI, SERPINB11, CTLA2B                                                                                                                                                                                                                                                              |
| GOTERM_BP_FAT   | GO:0002822~regulation of adaptive immune response based on somatic recombination of immune receptors built from immunoglobulin superfamily domains | 4  | 0.0110 IGHG, SLC11A1, FCGR2B, FCGR3                                                                                                                                                                                                                                                                                       |
| GOTERM_BP_FAT   | GO:0002819~regulation of adaptive immune response                                                                                                  | 4  | 0.0110 IGHG, SLC11A1, FCGR2B, FCGR3                                                                                                                                                                                                                                                                                       |

|                 |                                                                                                      |    |        |                                                                                                                                                                                |
|-----------------|------------------------------------------------------------------------------------------------------|----|--------|--------------------------------------------------------------------------------------------------------------------------------------------------------------------------------|
| GOTERM_MF_FAT   | GO:0005539~glycosaminoglycan binding                                                                 | 5  | 0.0111 | CD44, CCDC80, FSTL1, THBS2, CCL7                                                                                                                                               |
| GOTERM_BP_FAT   | GO:0031349~positive regulation of defense response                                                   | 4  | 0.0116 | IGHG, CD47, ADORA2B, FCGR3                                                                                                                                                     |
| GOTERM_BP_FAT   | GO:0051270~regulation of cell motion                                                                 | 5  | 0.0118 | SELP, CORO1A, HIF1A, CXCR4, SEMA3F                                                                                                                                             |
| GOTERM_MF_FAT   | GO:0019210~kinase inhibitor activity                                                                 | 3  | 0.0120 | CDKN1A, CDKN2A, PKIG                                                                                                                                                           |
| GOTERM_MF_FAT   | GO:0004950~chemokine receptor activity                                                               | 3  | 0.0120 | CCR5, CXCR4, CXCR2                                                                                                                                                             |
| GOTERM_MF_FAT   | GO:0019239~deaminase activity                                                                        | 3  | 0.0120 | GDA, APOBEC1, AMPD3                                                                                                                                                            |
| GOTERM_MF_FAT   | GO:0019956~chemokine binding                                                                         | 3  | 0.0130 | CCR5, CXCR4, CXCR2                                                                                                                                                             |
| KEGG_PATHWAY    | mmu04512:ECM-receptor interaction                                                                    | 5  | 0.0134 | CD47, CD44, TNC, THBS2, SPP1                                                                                                                                                   |
| UP_SEQ_FEATURE  | domain:Peptidase S1                                                                                  | 5  | 0.0137 | PLAT, CFB, HGF, PRSS22, TMPRSS4                                                                                                                                                |
| GOTERM_BP_FAT   | GO:0001819~positive regulation of cytokine production                                                | 4  | 0.0145 | SLC11A1, ADORA2B, IL1B, CASP1                                                                                                                                                  |
| GOTERM_MF_FAT   | GO:0070011~peptidase activity, acting on L-amino acid peptides                                       | 11 | 0.0162 | PLAT, BMP1, CFB, BACE2, HGF, NAPSA, CASP1, PRSS22, CTLA2B, ADAMTS4, TMPRSS4                                                                                                    |
| GOTERM_MF_FAT   | GO:0030247~polysaccharide binding                                                                    | 5  | 0.0164 | CD44, CCDC80, FSTL1, THBS2, CCL7                                                                                                                                               |
| GOTERM_MF_FAT   | GO:0001871~pattern binding                                                                           | 5  | 0.0164 | CD44, CCDC80, FSTL1, THBS2, CCL7                                                                                                                                               |
| GOTERM_BP_FAT   | GO:0002246~healing during inflammatory response                                                      | 2  | 0.0164 | HIF1A, CD44                                                                                                                                                                    |
| GOTERM_MF_FAT   | GO:0016814~hydrolase activity, acting on carbon-nitrogen (but not peptide) bonds, in cyclic amidines | 3  | 0.0165 | GDA, APOBEC1, AMPD3                                                                                                                                                            |
| UP_SEQ_FEATURE  | region of interest:CH4                                                                               | 2  | 0.0165 | LOC100048770, IGH-6                                                                                                                                                            |
| UP_SEQ_FEATURE  | domain:Ig-like C1-type                                                                               | 3  | 0.0181 | LOC641240, H2-EB1, H2-AA, H2-AB1                                                                                                                                               |
| UP_SEQ_FEATURE  | short sequence motif:Box 1 motif                                                                     | 3  | 0.0181 | OSMR, CSF2RB2, CSF3R                                                                                                                                                           |
| SP_PIR_KEYWORDS | Protease                                                                                             | 10 | 0.0182 | PLAT, BMP1, CFB, BACE2, SLPI, NAPSA, CASP1, PRSS22, ADAMTS4, TMPRSS4                                                                                                           |
| KEGG_PATHWAY    | mmu04612:Antigen processing and presentation                                                         | 5  | 0.0182 | CIITA, LOC641240, H2-EB1, H2-AA, H2-T10, H2-AB1                                                                                                                                |
| SP_PIR_KEYWORDS | polymorphism                                                                                         | 6  | 0.0187 | CDKN2A, CCR5, FCGR2B, DARC, MS4A8A, SIRPA                                                                                                                                      |
| INTERPRO        | IPR000742:EGF-like, type 3                                                                           | 6  | 0.0191 | PLAT, SELP, FBLN1, BMP1, TNC, THBS2                                                                                                                                            |
| GOTERM_BP_FAT   | GO:0051046~regulation of secretion                                                                   | 5  | 0.0198 | OSM, ADORA2B, IL1B, CASP1, SRGN                                                                                                                                                |
| GOTERM_BP_FAT   | GO:0002703~regulation of leukocyte mediated immunity                                                 | 4  | 0.0200 | IGHG, ADORA2B, FCGR2B, FCGR3                                                                                                                                                   |
| INTERPRO        | IPR006210:EGF-like                                                                                   | 6  | 0.0206 | PLAT, SELP, FBLN1, TNC, TNFRSF18, THBS2                                                                                                                                        |
| GOTERM_BP_FAT   | GO:0051048~negative regulation of secretion                                                          | 3  | 0.0207 | OSM, IL1B, SRGN                                                                                                                                                                |
| GOTERM_BP_FAT   | GO:0051051~negative regulation of transport                                                          | 4  | 0.0215 | OSM, PKIG, IL1B, SRGN                                                                                                                                                          |
| UP_SEQ_FEATURE  | region of interest:Connecting peptide                                                                | 3  | 0.0225 | LOC641240, H2-EB1, H2-AA, H2-AB1                                                                                                                                               |
| GOTERM_MF_FAT   | GO:0008083~growth factor activity                                                                    | 5  | 0.0225 | CXCL1, INHBA, BMP1, IL1B, HGF                                                                                                                                                  |
| GOTERM_BP_FAT   | GO:0008219~cell death                                                                                | 10 | 0.0241 | OSM, LY22, TMEM173, CDKN2A, TNFRSF18, CXCR2, NAIP1, CASP1, DRAM1, SRGN                                                                                                         |
| SP_PIR_KEYWORDS | receptor                                                                                             | 29 | 0.0242 | TNFRSF22, KLRA17, ADORA2B, OSMR, CSF2RB2, CXCR2, FPR2, GPRC5A, CD44, GP49A, CXCR4, TNFRSF18, CSF3R, CLEC4D, MS4A8A, PILRA, PIRA11, SPSB1, MS4A6D, GPR171, FCGR4, FCGR3, GPR35, |
| GOTERM_BP_FAT   | GO:0010543~regulation of platelet activation                                                         | 2  | 0.0245 | SELP, PLEK                                                                                                                                                                     |
| GOTERM_BP_FAT   | GO:0010572~positive regulation of platelet activation                                                | 2  | 0.0245 | SELP, PLEK                                                                                                                                                                     |
| GOTERM_BP_FAT   | GO:0034341~response to interferon-gamma                                                              | 2  | 0.0245 | CIITA, SLC11A1                                                                                                                                                                 |
| UP_SEQ_FEATURE  | region of interest:Beta-1                                                                            | 2  | 0.0247 | LOC641240, H2-EB1, H2-AB1                                                                                                                                                      |
| UP_SEQ_FEATURE  | region of interest:Beta-2                                                                            | 2  | 0.0247 | LOC641240, H2-EB1, H2-AB1                                                                                                                                                      |
| INTERPRO        | IPR001314:Peptidase S1A, chymotrypsin                                                                | 5  | 0.0249 | PLAT, CFB, HGF, PRSS22, TMPRSS4                                                                                                                                                |
| GOTERM_BP_FAT   | GO:0016044~membrane organization                                                                     | 7  | 0.0250 | IGHG, SLC11A1, CD47, DAB2, FCGR2B, SIRPA, FCGR3                                                                                                                                |
| GOTERM_BP_FAT   | GO:0002712~regulation of B cell mediated immunity                                                    | 3  | 0.0252 | IGHG, FCGR2B, FCGR3                                                                                                                                                            |
| GOTERM_BP_FAT   | GO:0002889~regulation of immunoglobulin mediated immune response                                     | 3  | 0.0252 | IGHG, FCGR2B, FCGR3                                                                                                                                                            |
| GOTERM_MF_FAT   | GO:0008201~heparin binding                                                                           | 4  | 0.0253 | CCDC80, FSTL1, THBS2, CCL7                                                                                                                                                     |
| PIR_SUPERFAMILY | PIRSF038545:chemokine receptor                                                                       | 3  | 0.0257 | CCR5, CXCR4, CXCR2                                                                                                                                                             |
| UP_SEQ_FEATURE  | short sequence motif:WSXWS motif                                                                     | 3  | 0.0272 | OSMR, CSF2RB2, CSF3R                                                                                                                                                           |
| GOTERM_BP_FAT   | GO:0016265~death                                                                                     | 10 | 0.0275 | OSM, LY22, TMEM173, CDKN2A, TNFRSF18, CXCR2, NAIP1, CASP1, DRAM1, SRGN                                                                                                         |
| KEGG_PATHWAY    | mmu04514:Cell adhesion molecules (CAMs)                                                              | 6  | 0.0279 | SELP, GLYCAM1, LOC641240, H2-EB1, H2-AA, H2-T10, H2-AB1                                                                                                                        |



|                 |                                                                                                                                                             |    |        |                                                                              |
|-----------------|-------------------------------------------------------------------------------------------------------------------------------------------------------------|----|--------|------------------------------------------------------------------------------|
| GOTERM_BP_FAT   | GO:0032675~regulation of interleukin-6 production                                                                                                           | 3  | 0.0284 | CEBPB, ADORA2B, IL1B                                                         |
| GOTERM_BP_FAT   | GO:0034097~response to cytokine stimulus                                                                                                                    | 3  | 0.0284 | CIITA, SLC11A1, CORO1A                                                       |
| SP_PIR_KEYWORDS | sulfation                                                                                                                                                   | 3  | 0.0287 | CCR5, CD44, CXCR4                                                            |
| SP_PIR_KEYWORDS | egf-like domain                                                                                                                                             | 6  | 0.0299 | PLAT, SELP, FBLN1, BMP1, TNC, THBS2                                          |
| SP_PIR_KEYWORDS | igg-binding protein                                                                                                                                         | 2  | 0.0308 | FCGR2B, FCGR3                                                                |
| GOTERM_BP_FAT   | GO:0002824~positive regulation of adaptive immune response based on somatic recombination of immune receptors built from immunoglobulin superfamily domains | 3  | 0.0318 | IGHG, SLC11A1, FCGR3                                                         |
| GOTERM_BP_FAT   | GO:0002821~positive regulation of adaptive immune response                                                                                                  | 3  | 0.0318 | IGHG, SLC11A1, FCGR3                                                         |
| GOTERM_BP_FAT   | GO:0010575~positive regulation of vascular endothelial growth factor production                                                                             | 2  | 0.0326 | ADORA2B, IL1B                                                                |
| GOTERM_BP_FAT   | GO:0010574~regulation of vascular endothelial growth factor production                                                                                      | 2  | 0.0326 | ADORA2B, IL1B                                                                |
| UP_SEQ_FEATURE  | region of interest:CH3                                                                                                                                      | 2  | 0.0328 | LOC100048770, IGH-6                                                          |
| GOTERM_BP_FAT   | GO:0002274~myeloid leukocyte activation                                                                                                                     | 3  | 0.0336 | SLC11A1, FCGR2B, FCGR3                                                       |
| SMART           | SM00181:EGF                                                                                                                                                 | 6  | 0.0340 | PLAT, SELP, FBLN1, TNC, TNFRSF18, THBS2                                      |
| INTERPRO        | IPR003599:Immunoglobulin subtype                                                                                                                            | 7  | 0.0345 | LOC100048770, PIRA11, FCGR2B, PIRA4, FCGR4, LILRA6, SIRPA, FCGR3             |
| INTERPRO        | IPR001254:Peptidase S1 and S6, chymotrypsin/Hap                                                                                                             | 5  | 0.0348 | PLAT, CFB, HGF, PRSS22, TMPRSS4                                              |
| GOTERM_BP_FAT   | GO:0002697~regulation of immune effector process                                                                                                            | 4  | 0.0361 | IGHG, ADORA2B, FCGR2B, FCGR3                                                 |
| GOTERM_BP_FAT   | GO:0030335~positive regulation of cell migration                                                                                                            | 3  | 0.0372 | SELP, CORO1A, HIF1A                                                          |
| GOTERM_MF_FAT   | GO:0019864~IgG binding                                                                                                                                      | 2  | 0.0374 | FCGR2B, FCGR3                                                                |
| INTERPRO        | IPR000096:Serum amyloid A protein                                                                                                                           | 2  | 0.0380 | SAA1, SAA3                                                                   |
| GOTERM_BP_FAT   | GO:0016485~protein processing                                                                                                                               | 4  | 0.0382 | IGHG, CFB, CASP1, SRGN                                                       |
| GOTERM_BP_FAT   | GO:0006915~apoptosis                                                                                                                                        | 9  | 0.0383 | OSM, TMEM173, CDKN2A, TNFRSF18, CXCR2, NAI1, CASP1, DRAM1, SRGN              |
| GOTERM_BP_FAT   | GO:0031328~positive regulation of cellular biosynthetic process                                                                                             | 10 | 0.0385 | OSM, CIITA, INHBA, SLC11A1, HIF1A, CEBPB, ADORA2B, IL1B, FCGR3, LOC100047419 |
| SP_PIR_KEYWORDS | cleavage on pair of basic residues                                                                                                                          | 6  | 0.0386 | PLAT, INSL3, INHBA, BMP1, CFB, ADAMTS4                                       |
| GOTERM_BP_FAT   | GO:0016192~vesicle-mediated transport                                                                                                                       | 9  | 0.0387 | IGHG, SLC11A1, CD47, DAB2, PLEK, FCGR2B, IGH-6, SIRPA, FCGR3                 |
| GOTERM_BP_FAT   | GO:0032496~response to lipopolysaccharide                                                                                                                   | 3  | 0.0390 | SLC11A1, IL1B, IRG1                                                          |
| GOTERM_CC_FAT   | GO:0030659~cytoplasmic vesicle membrane                                                                                                                     | 4  | 0.0394 | SELP, SLC11A1, DAB2, CORO1A                                                  |
| GOTERM_BP_FAT   | GO:0030334~regulation of cell migration                                                                                                                     | 4  | 0.0404 | SELP, CORO1A, HIF1A, CXCR4                                                   |
| GOTERM_BP_FAT   | GO:0009891~positive regulation of biosynthetic process                                                                                                      | 10 | 0.0405 | OSM, CIITA, INHBA, SLC11A1, HIF1A, CEBPB, ADORA2B, IL1B, FCGR3, LOC100047419 |
| UP_SEQ_FEATURE  | region of interest:CH2                                                                                                                                      | 2  | 0.0408 | LOC100048770, IGH-6                                                          |
| UP_SEQ_FEATURE  | domain:Kring1                                                                                                                                               | 2  | 0.0408 | PLAT, HGF                                                                    |
| UP_SEQ_FEATURE  | domain:Kring2                                                                                                                                               | 2  | 0.0408 | PLAT, HGF                                                                    |
| GOTERM_BP_FAT   | GO:0012501~programmed cell death                                                                                                                            | 9  | 0.0416 | OSM, TMEM173, CDKN2A, TNFRSF18, CXCR2, NAI1, CASP1, DRAM1, SRGN              |
| GOTERM_BP_FAT   | GO:0051251~positive regulation of lymphocyte activation                                                                                                     | 4  | 0.0426 | CDKN1A, CORO1A, H2-AA, IGH-6                                                 |
| SMART           | SM00197:SAA                                                                                                                                                 | 2  | 0.0436 | SAA1, SAA3                                                                   |
| GOTERM_MF_FAT   | GO:0001968~fibronectin binding                                                                                                                              | 2  | 0.0448 | TNC, CCDC80                                                                  |
| GOTERM_MF_FAT   | GO:0004861~cyclin-dependent protein kinase inhibitor activity                                                                                               | 2  | 0.0448 | CDKN1A, CDKN2A                                                               |
| GOTERM_BP_FAT   | GO:0051272~positive regulation of cell motion                                                                                                               | 3  | 0.0448 | SELP, CORO1A, HIF1A                                                          |
| GOTERM_BP_FAT   | GO:0051604~protein maturation                                                                                                                               | 4  | 0.0449 | IGHG, CFB, CASP1, SRGN                                                       |
| PIR_SUPERFAMILY | PIRSF002472:amyloid protein, SAA type                                                                                                                       | 2  | 0.0450 | SAA1, SAA3                                                                   |
| GOTERM_BP_FAT   | GO:0051240~positive regulation of multicellular organismal process                                                                                          | 5  | 0.0458 | SLC11A1, CDKN2A, ADORA2B, IL1B, CASP1                                        |
| SP_PIR_KEYWORDS | Apoptosis                                                                                                                                                   | 7  | 0.0484 | TMEM173, CDKN2A, TNFRSF18, NAI1, CASP1, DRAM1, SRGN                          |
| GOTERM_BP_FAT   | GO:0048255~mRNA stabilization                                                                                                                               | 2  | 0.0485 | SLC11A1, APOBEC1                                                             |
| GOTERM_BP_FAT   | GO:0043489~RNA stabilization                                                                                                                                | 2  | 0.0485 | SLC11A1, APOBEC1                                                             |
| GOTERM_BP_FAT   | GO:0060638~mesenchymal-epithelial cell signaling                                                                                                            | 2  | 0.0485 | TNC, HGF                                                                     |
| UP_SEQ_FEATURE  | short sequence motif:ITIM motif 2                                                                                                                           | 2  | 0.0488 | GP49A, LILRB4, PILRA                                                         |
| UP_SEQ_FEATURE  | short sequence motif:ITIM motif 1                                                                                                                           | 2  | 0.0488 | GP49A, LILRB4, PILRA                                                         |

|                |                                                                    |   |                                      |
|----------------|--------------------------------------------------------------------|---|--------------------------------------|
| GOTERM_CC_FAT  | GO:0044433~cytoplasmic vesicle part                                | 4 | 0.0490 SELP, SLC11A1, DAB2, CORO1A   |
| UP_SEQ_FEATURE | glycosylation site:O-linked (GalNAc...)                            | 3 | 0.0495 IGHG, CCR5, SPP1              |
| GOTERM_BP_FAT  | GO:0051241~negative regulation of multicellular organismal process | 4 | 0.0496 INHBA, SLC11A1, ADORA2B, SRGN |

## Supplementary Table 7: IPA Functional Annotation

### PTEN Loss Down, ERG Down

| Category                            | Functions Annotation                          | p-Value  | Molecules                             | # Molecules |
|-------------------------------------|-----------------------------------------------|----------|---------------------------------------|-------------|
| Molecular Transport                 | transport of Cu <sup>2+</sup>                 | 1.04E-04 | FKBP4,SLC11A2                         | 2           |
| Molecular Transport                 | transport of inorganic cation                 | 2.12E-04 | ADRA2A,ATP6V1C2,BHLHA15,FKBP4,SLC11A2 | 5           |
| Molecular Transport                 | transport of metal ion                        | 1.34E-03 | ADRA2A,BHLHA15,FKBP4,SLC11A2          | 4           |
| Molecular Transport                 | transport of divalent cations                 | 1.55E-03 | BHLHA15,FKBP4,SLC11A2                 | 3           |
| Molecular Transport                 | accumulation of phospholipid hydroperoxide    | 1.56E-03 | PRDX6                                 | 1           |
| Free Radical Scavenging             | accumulation of phospholipid hydroperoxide    | 1.56E-03 | PRDX6                                 | 1           |
| Lipid Metabolism                    | accumulation of phospholipid hydroperoxide    | 1.56E-03 | PRDX6                                 | 1           |
| Small Molecule Biochemistry         | accumulation of phospholipid hydroperoxide    | 1.56E-03 | PRDX6                                 | 1           |
| Developmental Disorder              | benign adult cystinosis                       | 1.56E-03 | CTNS                                  | 1           |
| Hereditary Disorder                 | benign adult cystinosis                       | 1.56E-03 | CTNS                                  | 1           |
| Metabolic Disease                   | benign adult cystinosis                       | 1.56E-03 | CTNS                                  | 1           |
| Connective Tissue Disorders         | bleeding of granulation tissue                | 1.56E-03 | PRDX6                                 | 1           |
| Organismal Injury and Abnormalities | bleeding of granulation tissue                | 1.56E-03 | PRDX6                                 | 1           |
| Cellular Assembly and Organization  | co-localization of microtubules               | 1.56E-03 | FKBP4                                 | 1           |
| Cellular Function and Maintenance   | co-localization of microtubules               | 1.56E-03 | FKBP4                                 | 1           |
| Lipid Metabolism                    | conversion of 13,14-dihydro-15-oxo-lipoxin A4 | 1.56E-03 | HPGD                                  | 1           |
| Small Molecule Biochemistry         | conversion of 13,14-dihydro-15-oxo-lipoxin A4 | 1.56E-03 | HPGD                                  | 1           |
| Carbohydrate Metabolism             | degradation of colfosceril palmitate          | 1.56E-03 | PRDX6                                 | 1           |
| Lipid Metabolism                    | degradation of colfosceril palmitate          | 1.56E-03 | PRDX6                                 | 1           |
| Small Molecule Biochemistry         | degradation of colfosceril palmitate          | 1.56E-03 | PRDX6                                 | 1           |
| Carbohydrate Metabolism             | degradation of colfosceril palmitate          | 1.56E-03 | PRDX6                                 | 1           |
| Lipid Metabolism                    | degradation of lysophosphatidylcholine        | 1.56E-03 | PRDX6                                 | 1           |
| Small Molecule Biochemistry         | degradation of lysophosphatidylcholine        | 1.56E-03 | PRDX6                                 | 1           |
| Cellular Assembly and Organization  | disruption of small unilamellar vesicles      | 1.56E-03 | TST                                   | 1           |
| Cellular Compromise                 | disruption of small unilamellar vesicles      | 1.56E-03 | TST                                   | 1           |
| Cellular Growth and Proliferation   | generation of dermal fibroblasts              | 1.56E-03 | MYCL1                                 | 1           |
| Tissue Development                  | generation of dermal fibroblasts              | 1.56E-03 | MYCL1                                 | 1           |
| Hereditary Disorder                 | glycine N-methyltransferase deficiency        | 1.56E-03 | GNMT                                  | 1           |
| Metabolic Disease                   | glycine N-methyltransferase deficiency        | 1.56E-03 | GNMT                                  | 1           |
| Cellular Assembly and Organization  | growth of retinal axons                       | 1.56E-03 | SEMA5A                                | 1           |

|                                         |                                                                       |          |         |   |
|-----------------------------------------|-----------------------------------------------------------------------|----------|---------|---|
| Nervous System Development and Function |                                                                       |          |         |   |
| Function                                | growth of retinal axons                                               | 1.56E-03 | SEMA5A  | 1 |
| Cancer                                  | growth of small-cell carcinoma                                        | 1.56E-03 | MME     | 1 |
| Cancer                                  | head and neck nonmelanoma skin cancer                                 | 1.56E-03 | MYCL1   | 1 |
| Dermatological Diseases and Conditions  |                                                                       |          |         |   |
| Conditions                              | head and neck nonmelanoma skin cancer                                 | 1.56E-03 | MYCL1   | 1 |
| Molecular Transport                     | import of Fe2+                                                        | 1.56E-03 | SLC11A2 | 1 |
| Developmental Disorder                  |                                                                       |          |         |   |
| Disorder                                | juvenile nephropathic cystinosis                                      | 1.56E-03 | CTNS    | 1 |
| Hereditary Disorder                     | juvenile nephropathic cystinosis                                      | 1.56E-03 | CTNS    | 1 |
| Metabolic Disease                       | juvenile nephropathic cystinosis                                      | 1.56E-03 | CTNS    | 1 |
| Cancer                                  | lower lip cancer                                                      | 1.56E-03 | MYCL1   | 1 |
| Gastrointestinal Disease                |                                                                       |          |         |   |
| Disease                                 | lower lip cancer                                                      | 1.56E-03 | MYCL1   | 1 |
| Cancer                                  | lysis of glioma cells                                                 | 1.56E-03 | MME     | 1 |
| Cell Death and Survival                 |                                                                       |          |         |   |
| Tumor Morphology                        | lysis of glioma cells                                                 | 1.56E-03 | MME     | 1 |
| Organ Morphology                        |                                                                       |          |         |   |
| Organ Morphology                        | organization of exocrine region of pancreas                           | 1.56E-03 | BHLHA15 | 1 |
| Tissue Development                      | organization of exocrine region of pancreas                           | 1.56E-03 | BHLHA15 | 1 |
| Cellular Compromise                     |                                                                       |          |         |   |
| Cellular Compromise                     | oxidative stress response of carcinoma cell lines                     | 1.56E-03 | PRDX6   | 1 |
| Cellular Compromise                     | oxidative stress response of lung cancer cell lines                   | 1.56E-03 | PRDX6   | 1 |
| Cellular Movement                       | pathfinding of retinal axons                                          | 1.56E-03 | SEMA5A  | 1 |
| Nervous System Development and Function |                                                                       |          |         |   |
| Function                                | pathfinding of retinal axons                                          | 1.56E-03 | SEMA5A  | 1 |
| Molecular Transport                     |                                                                       |          |         |   |
| Molecular Transport                     | quantity of 1-palmitoyl-2-linoleoyl phosphatidylcholine hydroperoxide | 1.56E-03 | PRDX6   | 1 |
| Carbohydrate Metabolism                 |                                                                       |          |         |   |
| Metabolism                              | quantity of 1-palmitoyl-2-linoleoyl phosphatidylcholine hydroperoxide | 1.56E-03 | PRDX6   | 1 |
| Free Radical Scavenging                 |                                                                       |          |         |   |
| Scavenging                              | quantity of 1-palmitoyl-2-linoleoyl phosphatidylcholine hydroperoxide | 1.56E-03 | PRDX6   | 1 |
| Lipid Metabolism                        |                                                                       |          |         |   |
| Metabolism                              | quantity of 1-palmitoyl-2-linoleoyl phosphatidylcholine hydroperoxide | 1.56E-03 | PRDX6   | 1 |
| Small Molecule Biochemistry             |                                                                       |          |         |   |
| Biochemistry                            | quantity of 1-palmitoyl-2-linoleoyl phosphatidylcholine hydroperoxide | 1.56E-03 | PRDX6   | 1 |
| Cell Morphology                         |                                                                       |          |         |   |
| Cell Morphology                         | reorganization of intercellular junctions                             | 1.56E-03 | MMP7    | 1 |
| Cell-To-Cell Signaling and Interaction  |                                                                       |          |         |   |
| Signaling and Interaction               | reorganization of intercellular junctions                             | 1.56E-03 | MMP7    | 1 |
| Cellular Assembly and Organization      |                                                                       |          |         |   |
| Assembly and Organization               | reorganization of intercellular junctions                             | 1.56E-03 | MMP7    | 1 |
| Cellular Function and Maintenance       |                                                                       |          |         |   |
| Function and Maintenance                | reorganization of intercellular junctions                             | 1.56E-03 | MMP7    | 1 |
| Cell Morphology                         | volume of leukemia cell lines                                         | 1.56E-03 | SCIN    | 1 |

|                                           |                                                               |          |                                      |   |
|-------------------------------------------|---------------------------------------------------------------|----------|--------------------------------------|---|
| Tissue Morphology                         | volume of leukemia cell lines                                 | 1.56E-03 | SCIN                                 | 1 |
| Ophthalmic Disease                        | choroidal neovascularization                                  | 2.12E-03 | MME,MMP7                             | 2 |
| Neurological Disease                      | disorder of basal ganglia                                     | 2.62E-03 | ADRA2A,DBP,FKBP4,PRDX6,SEMA5A,SH3GL2 | 6 |
| Cancer                                    | growth of carcinoma                                           | 2.95E-03 | GNMT,MME                             | 2 |
| Cancer                                    | Merkel-cell carcinoma                                         | 3.12E-03 | MYCL1                                | 1 |
| Dermatological Diseases and Conditions    | Merkel-cell carcinoma                                         | 3.12E-03 | MYCL1                                | 1 |
| Cellular Assembly and Organization        | bending of actin                                              | 3.12E-03 | SCIN                                 | 1 |
| Post-Translational Modification           | bending of actin                                              | 3.12E-03 | SCIN                                 | 1 |
| Small Molecule Biochemistry               | binding of androgen                                           | 3.12E-03 | FKBP4                                | 1 |
| Endocrine System Development and Function | binding of androgen                                           | 3.12E-03 | FKBP4                                | 1 |
| Small Molecule Biochemistry               | catabolism of cyanate                                         | 3.12E-03 | TST                                  | 1 |
| Cellular Assembly and Organization        | cleavage of actin                                             | 3.12E-03 | SCIN                                 | 1 |
| Post-Translational Modification           | cleavage of actin                                             | 3.12E-03 | SCIN                                 | 1 |
| Protein Degradation                       | cleavage of actin                                             | 3.12E-03 | SCIN                                 | 1 |
| Protein Synthesis                         | cleavage of actin                                             | 3.12E-03 | SCIN                                 | 1 |
| Tissue Development Embryonic              | development of genital tubercle                               | 3.12E-03 | FKBP4                                | 1 |
| Development Organismal                    | development of genital tubercle                               | 3.12E-03 | FKBP4                                | 1 |
| Development                               | development of genital tubercle                               | 3.12E-03 | FKBP4                                | 1 |
| Tissue Morphology                         | diameter of tumor tissue                                      | 3.12E-03 | MMP7                                 | 1 |
| Tumor Morphology                          | diameter of tumor tissue                                      | 3.12E-03 | MMP7                                 | 1 |
| Cancer                                    | differentiation of glioma                                     | 3.12E-03 | SEMA5A                               | 1 |
| Tumor Morphology                          | differentiation of glioma                                     | 3.12E-03 | SEMA5A                               | 1 |
| Cellular Development                      | differentiation of glioma                                     | 3.12E-03 | SEMA5A                               | 1 |
| Tissue Morphology                         | disruption of basement membrane                               | 3.12E-03 | MMP7                                 | 1 |
| Cellular Compromise                       | dysfunction of retinal ganglion cells                         | 3.12E-03 | SEMA5A                               | 1 |
| Cell Cycle                                | entry into cell cycle progression of breast cancer cell lines | 3.12E-03 | HPGD                                 | 1 |
| Developmental Disorder                    | infantile nephropathic cystinosis                             | 3.12E-03 | CTNS                                 | 1 |
| Hereditary Disorder                       | infantile nephropathic cystinosis                             | 3.12E-03 | CTNS                                 | 1 |
| Metabolic Disease                         | infantile nephropathic cystinosis                             | 3.12E-03 | CTNS                                 | 1 |
| Inflammatory Disease                      | infantile nephropathic cystinosis                             | 3.12E-03 | CTNS                                 | 1 |
| Inflammatory Response                     | infantile nephropathic cystinosis                             | 3.12E-03 | CTNS                                 | 1 |
| Renal and Urological Disease              | infantile nephropathic cystinosis                             | 3.12E-03 | CTNS                                 | 1 |
| Developmental Disorder                    | metaplasia of ductal epithelium                               | 3.12E-03 | MMP7                                 | 1 |
| Lipid Metabolism                          | oxidation of dinoprost                                        | 3.12E-03 | HPGD                                 | 1 |

|                       |                                      |          |                                      |   |
|-----------------------|--------------------------------------|----------|--------------------------------------|---|
| Small Molecule        |                                      |          |                                      |   |
| Biochemistry          | oxidation of dinoprost               | 3.12E-03 | HPGD                                 | 1 |
| Energy Production     | oxidation of dinoprost               | 3.12E-03 | HPGD                                 | 1 |
| Lipid Metabolism      | oxidation of prostaglandin E2        | 3.12E-03 | HPGD                                 | 1 |
| Small Molecule        |                                      |          |                                      |   |
| Biochemistry          | oxidation of prostaglandin E2        | 3.12E-03 | HPGD                                 | 1 |
| Drug Metabolism       | oxidation of prostaglandin E2        | 3.12E-03 | HPGD                                 | 1 |
| Energy Production     | oxidation of prostaglandin E2        | 3.12E-03 | HPGD                                 | 1 |
|                       | quantity of disaturated              |          |                                      |   |
| Molecular Transport   | phosphatidylcholine                  | 3.12E-03 | PRDX6                                | 1 |
| Carbohydrate          | quantity of disaturated              |          |                                      |   |
| Metabolism            | phosphatidylcholine                  | 3.12E-03 | PRDX6                                | 1 |
|                       | quantity of disaturated              |          |                                      |   |
| Lipid Metabolism      | phosphatidylcholine                  | 3.12E-03 | PRDX6                                | 1 |
| Small Molecule        | quantity of disaturated              |          |                                      |   |
| Biochemistry          | phosphatidylcholine                  | 3.12E-03 | PRDX6                                | 1 |
|                       | vacuolation of tubulovesicular       |          |                                      |   |
| Cell Morphology       | structures                           | 3.12E-03 | SH3GL2                               | 1 |
| Cardiovascular System |                                      |          |                                      |   |
| Development and       |                                      |          |                                      |   |
| Function              | vasoconstriction of umbilical artery | 3.12E-03 | MME                                  | 1 |
| Molecular Transport   | transport of H+                      | 3.41E-03 | ATP6V1C2,SLC11A2                     | 2 |
| Organismal Injury and |                                      |          |                                      |   |
| Abnormalities         | acute lung injury                    | 3.53E-03 | ADRA2A,AZGP1                         | 2 |
| Respiratory Disease   | acute lung injury                    | 3.53E-03 | ADRA2A,AZGP1                         | 2 |
| Gastrointestinal      |                                      |          |                                      |   |
| Disease               | colitis                              | 4.05E-03 | HPGD,MME,MMP7                        | 3 |
| Inflammatory Disease  | colitis                              | 4.05E-03 | HPGD,MME,MMP7                        | 3 |
| Inflammatory          |                                      |          |                                      |   |
| Response              | colitis                              | 4.05E-03 | HPGD,MME,MMP7                        | 3 |
|                       | transport of monovalent inorganic    |          |                                      |   |
| Molecular Transport   | cation                               | 4.16E-03 | ADRA2A,ATP6V1C2,SLC11A2              | 3 |
| Neurological Disease  | cognitive impairment                 | 4.30E-03 | ADRA2A,MME                           | 2 |
| Cancer                | neuroendocrine tumor                 | 4.49E-03 | ADRA2A,AZGP1,MMP7,MYCL1              | 4 |
| Cancer                | small-cell carcinoma                 | 4.57E-03 | MME,MYCL1                            | 2 |
| Neurological Disease  | neuromuscular disease                | 4.64E-03 | ADRA2A,DBP,FKBP4,PRDX6,SEMA5A,SH3GL2 | 6 |
| Skeletal and Muscular |                                      |          |                                      |   |
| Disorders             | neuromuscular disease                | 4.64E-03 | ADRA2A,DBP,FKBP4,PRDX6,SEMA5A,SH3GL2 | 6 |
| Cellular Assembly and |                                      |          |                                      |   |
| Organization          | disruption of phospholipid vesicles  | 4.67E-03 | TST                                  | 1 |
| Cellular Compromise   | disruption of phospholipid vesicles  | 4.67E-03 | TST                                  | 1 |
| Cellular Assembly and |                                      |          |                                      |   |
| Organization          | formation of secretory vesicles      | 4.67E-03 | BHLHA15                              | 1 |
| Cellular Function and |                                      |          |                                      |   |
| Maintenance           | formation of secretory vesicles      | 4.67E-03 | BHLHA15                              | 1 |
| Lipid Metabolism      | metabolism of stearic acid           | 4.67E-03 | DBP                                  | 1 |
| Small Molecule        |                                      |          |                                      |   |
| Biochemistry          | metabolism of stearic acid           | 4.67E-03 | DBP                                  | 1 |
| Cellular Movement     | migration of myofibroblasts          | 4.67E-03 | MMP7                                 | 1 |
| Skeletal and Muscular |                                      |          |                                      |   |
| System Development    |                                      |          |                                      |   |
| and Function          | migration of myofibroblasts          | 4.67E-03 | MMP7                                 | 1 |

|                                        |                                                      |          |                                                  |   |
|----------------------------------------|------------------------------------------------------|----------|--------------------------------------------------|---|
| Organismal Injury and Abnormalities    | neurodegeneration of frontal cortex                  | 4.67E-03 | MME                                              | 1 |
| Neurological Disease                   | neurodegeneration of frontal cortex                  | 4.67E-03 | MME                                              | 1 |
| Cellular Compromise                    | peroxidation of phospholipid                         | 4.67E-03 | PRDX6                                            | 1 |
| Lipid Metabolism                       | peroxidation of phospholipid                         | 4.67E-03 | PRDX6                                            | 1 |
| Small Molecule                         |                                                      |          |                                                  |   |
| Biochemistry                           | peroxidation of phospholipid                         | 4.67E-03 | PRDX6                                            | 1 |
| Cell Cycle                             | polyploidization of leukemia cell lines              | 4.67E-03 | SCIN                                             | 1 |
| Reproductive System                    |                                                      |          |                                                  |   |
| Development and Function               | gestation                                            | 5.13E-03 | FKBP4,HPGD                                       | 2 |
| Molecular Transport                    | transport of molecule                                | 5.56E-03 | ADRA2A,ATP6V1C2,BHLHA15,CTNS,FKBP4,PRDX6,SLC11A2 | 7 |
| Neurological Disease                   | Parkinson's disease                                  | 5.69E-03 | ADRA2A,SEMA5A,SH3GL2                             | 3 |
| Skeletal and Muscular Disorders        | Parkinson's disease                                  | 5.69E-03 | ADRA2A,SEMA5A,SH3GL2                             | 3 |
| Organ Morphology                       | abnormal morphology of penis                         | 6.23E-03 | FKBP4                                            | 1 |
| Reproductive System                    |                                                      |          |                                                  |   |
| Development and Function               | abnormal morphology of penis                         | 6.23E-03 | FKBP4                                            | 1 |
| Cell-To-Cell Signaling and Interaction | detachment of lymphoma cell lines                    | 6.23E-03 | MMP7                                             | 1 |
| Tissue Development                     | detachment of lymphoma cell lines                    | 6.23E-03 | MMP7                                             | 1 |
| Hematological Disease                  | hypochromic microcytic anemia                        | 6.23E-03 | SLC11A2                                          | 1 |
| Metabolic Disease                      | iron deficiency                                      | 6.23E-03 | SLC11A2                                          | 1 |
| Hematological Disease                  | iron deficiency                                      | 6.23E-03 | SLC11A2                                          | 1 |
| Nutritional Disease                    | iron deficiency                                      | 6.23E-03 | SLC11A2                                          | 1 |
| Lipid Metabolism                       | metabolism of oleic acid                             | 6.23E-03 | DBP                                              | 1 |
| Small Molecule                         |                                                      |          |                                                  |   |
| Biochemistry                           | metabolism of oleic acid                             | 6.23E-03 | DBP                                              | 1 |
| Neurological Disease                   | postoperative delirium                               | 6.23E-03 | ADRA2A                                           | 1 |
| Psychological Disorders                | postoperative delirium                               | 6.23E-03 | ADRA2A                                           | 1 |
| Cellular Development                   | transdifferentiation of pancreatic cancer cell lines | 6.23E-03 | AZGP1                                            | 1 |
| Molecular Transport                    | translocation of phosphatidylserine                  | 6.23E-03 | PRDX6                                            | 1 |
| Carbohydrate Metabolism                | translocation of phosphatidylserine                  | 6.23E-03 | PRDX6                                            | 1 |
| Lipid Metabolism                       | translocation of phosphatidylserine                  | 6.23E-03 | PRDX6                                            | 1 |
| Small Molecule                         |                                                      |          |                                                  |   |
| Biochemistry                           | translocation of phosphatidylserine                  | 6.23E-03 | PRDX6                                            | 1 |
| Molecular Transport                    | transport of Co2+                                    | 6.23E-03 | SLC11A2                                          | 1 |
| Cancer                                 | tumorigenesis of intestinal adenoma                  | 6.23E-03 | MMP7                                             | 1 |

|                                        |                                       |          |                            |   |
|----------------------------------------|---------------------------------------|----------|----------------------------|---|
| Post-Translational Modification        | proteolysis                           | 6.52E-03 | MME,MMP7,SCIN              | 3 |
| Protein Degradation                    | proteolysis                           | 6.52E-03 | MME,MMP7,SCIN              | 3 |
| Protein Synthesis                      | proteolysis                           | 6.52E-03 | MME,MMP7,SCIN              | 3 |
| Neurological Disease                   | neurological signs                    | 6.84E-03 | ADRA2A,DBP,FKBP4,MME,PRDX6 | 5 |
| Cellular Assembly and Organization     | formation of vesicles                 | 7.01E-03 | BHLHA15,SH3GL2             | 2 |
| Cellular Function and Maintenance      | formation of vesicles                 | 7.01E-03 | BHLHA15,SH3GL2             | 2 |
| Protein Degradation                    | degradation of protein                | 7.23E-03 | AZGP1,MME,MMP7,SCIN        | 4 |
| Protein Synthesis                      | degradation of protein                | 7.23E-03 | AZGP1,MME,MMP7,SCIN        | 4 |
| Carbohydrate Metabolism                | adhesion of hyaluronic acid           | 7.78E-03 | MME                        | 1 |
| Small Molecule Biochemistry            | adhesion of hyaluronic acid           | 7.78E-03 | MME                        | 1 |
| Drug Metabolism                        | adhesion of hyaluronic acid           | 7.78E-03 | MME                        | 1 |
| Carbohydrate Metabolism                | cleavage of proteoglycan              | 7.78E-03 | MMP7                       | 1 |
| Small Molecule Biochemistry            | cleavage of proteoglycan              | 7.78E-03 | MMP7                       | 1 |
| Cell-To-Cell Signaling and Interaction | detachment of colon cancer cell lines | 7.78E-03 | MMP7                       | 1 |
| Tissue Development                     | detachment of colon cancer cell lines | 7.78E-03 | MMP7                       | 1 |
| Cellular Assembly and Organization     | formation of clathrin-coated vesicles | 7.78E-03 | SH3GL2                     | 1 |
| Cellular Function and Maintenance      | formation of clathrin-coated vesicles | 7.78E-03 | SH3GL2                     | 1 |
| Cancer                                 | hepatic hemangioma                    | 7.78E-03 | GNMT                       | 1 |
| Gastrointestinal Disease               | hepatic hemangioma                    | 7.78E-03 | GNMT                       | 1 |
| Cardiovascular Disease                 | hepatic hemangioma                    | 7.78E-03 | GNMT                       | 1 |
| Hepatic System Disease                 | hepatic hemangioma                    | 7.78E-03 | GNMT                       | 1 |
| Lipid Metabolism                       | metabolism of palmitic acid           | 7.78E-03 | DBP                        | 1 |
| Small Molecule Biochemistry            | metabolism of palmitic acid           | 7.78E-03 | DBP                        | 1 |
| Neurological Disease                   | muscle spasticity                     | 7.78E-03 | ADRA2A                     | 1 |
| Skeletal and Muscular Disorders        | muscle spasticity                     | 7.78E-03 | ADRA2A                     | 1 |
| Developmental Disorder                 | patent ductus arteriosus              | 7.78E-03 | ADRA2A                     | 1 |
| Cardiovascular Disease                 | patent ductus arteriosus              | 7.78E-03 | ADRA2A                     | 1 |
| Tissue Morphology                      | quantity of tumor tissue              | 7.78E-03 | MMP7                       | 1 |
| Neurological Disease                   | restlessness                          | 7.78E-03 | ADRA2A                     | 1 |
| Psychological Disorders                | restlessness                          | 7.78E-03 | ADRA2A                     | 1 |
| Embryonic Development                  | secondary sex determination           | 7.78E-03 | FKBP4                      | 1 |



|                                              |                                       |          |            |   |
|----------------------------------------------|---------------------------------------|----------|------------|---|
| Organismal Development                       | secondary sex determination           | 7.78E-03 | FKBP4      | 1 |
| Small Molecule Biochemistry                  | synthesis of S-adenosylmethionine     | 7.78E-03 | GNMT       | 1 |
| Amino Acid Metabolism                        | synthesis of S-adenosylmethionine     | 7.78E-03 | GNMT       | 1 |
| Nucleic Acid Metabolism                      | synthesis of S-adenosylmethionine     | 7.78E-03 | GNMT       | 1 |
| Molecular Transport                          | transport of cystine                  | 7.78E-03 | CTNS       | 1 |
| Small Molecule Biochemistry                  | transport of cystine                  | 7.78E-03 | CTNS       | 1 |
| Amino Acid Metabolism                        | transport of cystine                  | 7.78E-03 | CTNS       | 1 |
| Carbohydrate Metabolism                      | degradation of carbohydrate           | 7.87E-03 | MMP7,PRDX6 | 2 |
| Cell Morphology                              | abnormal morphology of amacrine cells | 9.32E-03 | SEMA5A     | 1 |
| Nervous System Development and Function      | abnormal morphology of amacrine cells | 9.32E-03 | SEMA5A     | 1 |
| Organ Morphology                             | abnormal morphology of amacrine cells | 9.32E-03 | SEMA5A     | 1 |
| Tissue Development                           | abnormal morphology of amacrine cells | 9.32E-03 | SEMA5A     | 1 |
| Tissue Morphology                            | abnormal morphology of amacrine cells | 9.32E-03 | SEMA5A     | 1 |
| Embryonic Development                        | abnormal morphology of amacrine cells | 9.32E-03 | SEMA5A     | 1 |
| Organismal Development                       | abnormal morphology of amacrine cells | 9.32E-03 | SEMA5A     | 1 |
| Organ Development                            | abnormal morphology of amacrine cells | 9.32E-03 | SEMA5A     | 1 |
| Visual System Development and Function       | abnormal morphology of amacrine cells | 9.32E-03 | SEMA5A     | 1 |
| Lipid Metabolism                             | binding of glucocorticoid             | 9.32E-03 | FKBP4      | 1 |
| Small Molecule Biochemistry                  | binding of glucocorticoid             | 9.32E-03 | FKBP4      | 1 |
| Endocrine System Development and Function    | binding of glucocorticoid             | 9.32E-03 | FKBP4      | 1 |
| Inflammatory Disease                         | croup                                 | 9.32E-03 | ADRA2A     | 1 |
| Respiratory Disease                          | croup                                 | 9.32E-03 | ADRA2A     | 1 |
| Embryonic Development                        | implantation of blastocyst            | 9.32E-03 | FKBP4      | 1 |
| Organismal Development                       | implantation of blastocyst            | 9.32E-03 | FKBP4      | 1 |
| Reproductive System Development and Function | implantation of blastocyst            | 9.32E-03 | FKBP4      | 1 |
| Neurological Disease                         | neuritic dystrophy                    | 9.32E-03 | MME        | 1 |
| Inflammatory Disease                         | neuritic dystrophy                    | 9.32E-03 | MME        | 1 |
| Gastrointestinal Disease                     | tonsillitis                           | 9.32E-03 | ADRA2A     | 1 |

|                                           |                                                                       |          |                                      |   |
|-------------------------------------------|-----------------------------------------------------------------------|----------|--------------------------------------|---|
| Inflammatory Disease                      | tonsillitis                                                           | 9.32E-03 | ADRA2A                               | 1 |
| Infectious Disease                        | tonsillitis                                                           | 9.32E-03 | ADRA2A                               | 1 |
| Cancer                                    | neuroendocrine carcinoma                                              | 9.55E-03 | AZGP1,MMP7,MYCL1                     | 3 |
| Molecular Transport                       | concentration of lipid                                                | 9.93E-03 | ADRA2A,FKBP4,GNMT,HPGD,PRDX6         | 5 |
| Lipid Metabolism                          | concentration of lipid                                                | 9.93E-03 | ADRA2A,FKBP4,GNMT,HPGD,PRDX6         | 5 |
| Small Molecule                            |                                                                       |          |                                      |   |
| Biochemistry                              | concentration of lipid                                                | 9.93E-03 | ADRA2A,FKBP4,GNMT,HPGD,PRDX6         | 5 |
| Protein Synthesis                         | metabolism of peptide                                                 | 1.01E-02 | CTNS,MME                             | 2 |
| Cardiovascular Disease                    | congestive heart failure                                              | 1.03E-02 | ADRA2A,HPGD                          | 2 |
| Inflammatory Response                     | inflammation of organ                                                 | 1.04E-02 | CTNS,HPGD,MME,MMP7,PRDX6             | 5 |
| Neurological Disease                      | movement disorder                                                     | 1.07E-02 | ADRA2A,DBP,FKBP4,PRDX6,SEMA5A,SH3GL2 | 6 |
| Tissue Development                        | aggregation of colon cancer cell lines                                | 1.09E-02 | MMP7                                 | 1 |
| Cell Death and Survival                   | apoptosis of acinar gland cells                                       | 1.09E-02 | MMP7                                 | 1 |
| Lipid Metabolism                          | binding of estrogen                                                   | 1.09E-02 | FKBP4                                | 1 |
| Small Molecule                            |                                                                       |          |                                      |   |
| Biochemistry                              | binding of estrogen                                                   | 1.09E-02 | FKBP4                                | 1 |
| Endocrine System Development and Function | binding of estrogen                                                   | 1.09E-02 | FKBP4                                | 1 |
| Small Molecule                            |                                                                       |          |                                      |   |
| Biochemistry                              | metabolism of folic acid                                              | 1.09E-02 | GNMT                                 | 1 |
| Drug Metabolism                           | metabolism of folic acid                                              | 1.09E-02 | GNMT                                 | 1 |
| Amino Acid Metabolism                     | metabolism of folic acid                                              | 1.09E-02 | GNMT                                 | 1 |
| Vitamin and Mineral Metabolism            | metabolism of folic acid                                              | 1.09E-02 | GNMT                                 | 1 |
|                                           | transmembrane receptor protein tyrosine phosphatase signaling pathway |          |                                      |   |
| Cell Signaling                            |                                                                       | 1.09E-02 | PTPRD                                | 1 |
| Small Molecule                            |                                                                       |          |                                      |   |
| Biochemistry                              | metabolism of ATP                                                     | 1.15E-02 | ATP6V1C2,CTNS                        | 2 |
| Energy Production                         | metabolism of ATP                                                     | 1.15E-02 | ATP6V1C2,CTNS                        | 2 |
| Nucleic Acid Metabolism                   | metabolism of ATP                                                     | 1.15E-02 | ATP6V1C2,CTNS                        | 2 |
| Organ Morphology                          | abnormal morphology of inner plexiform layer                          | 1.24E-02 | SEMA5A                               | 1 |
|                                           | abnormal morphology of inner plexiform layer                          |          |                                      |   |
| Tissue Development                        | plexiform layer                                                       | 1.24E-02 | SEMA5A                               | 1 |
| Embryonic Development                     | abnormal morphology of inner plexiform layer                          | 1.24E-02 | SEMA5A                               | 1 |
| Organismal Development                    | abnormal morphology of inner plexiform layer                          | 1.24E-02 | SEMA5A                               | 1 |
|                                           | abnormal morphology of inner plexiform layer                          |          |                                      |   |
| Organ Development                         | plexiform layer                                                       | 1.24E-02 | SEMA5A                               | 1 |
| Visual System Development and Function    | abnormal morphology of inner plexiform layer                          | 1.24E-02 | SEMA5A                               | 1 |
|                                           | cell viability of vascular endothelial cells                          |          |                                      |   |
| Cell Death and Survival                   |                                                                       | 1.24E-02 | PRDX6                                | 1 |

|                                                      |                                                       |          |                           |   |
|------------------------------------------------------|-------------------------------------------------------|----------|---------------------------|---|
| Cardiovascular System<br>Development and<br>Function | cell viability of vascular endothelial<br>cells       | 1.24E-02 | PRDX6                     | 1 |
| Cardiovascular System<br>Development and<br>Function | conduction of sinoatrial node                         | 1.24E-02 | MMP7                      | 1 |
| Organismal<br>Development                            | length of anogenital area                             | 1.24E-02 | FKBP4                     | 1 |
| Small Molecule<br>Biochemistry                       | metabolism of L-methionine                            | 1.24E-02 | GNMT                      | 1 |
| Amino Acid<br>Metabolism                             | metabolism of L-methionine                            | 1.24E-02 | GNMT                      | 1 |
| Small Molecule<br>Biochemistry                       | metabolism of S-adenosylmethionine                    | 1.24E-02 | GNMT                      | 1 |
| Amino Acid<br>Metabolism                             | metabolism of S-adenosylmethionine                    | 1.24E-02 | GNMT                      | 1 |
| Nucleic Acid<br>Metabolism                           | metabolism of S-adenosylmethionine                    | 1.24E-02 | GNMT                      | 1 |
| Lipid Metabolism<br>Small Molecule                   | metabolism of linoleic acid                           | 1.24E-02 | DBP                       | 1 |
| Biochemistry                                         | metabolism of linoleic acid                           | 1.24E-02 | DBP                       | 1 |
| Cell Morphology                                      | morphology of pheochromocytoma cell<br>lines          | 1.24E-02 | ADRA2A                    | 1 |
| Cellular Compromise                                  | severing of actin filaments                           | 1.24E-02 | SCIN                      | 1 |
| Reproductive System<br>Development and<br>Function   | superovulation                                        | 1.24E-02 | FKBP4                     | 1 |
| Cardiovascular System<br>Development and<br>Function | systolic pressure                                     | 1.33E-02 | ADRA2A,DBP                | 2 |
| Protein Synthesis                                    | metabolism of protein                                 | 1.35E-02 | AZGP1,MME,MMP7,SCIN,TST   | 5 |
| Lipid Metabolism<br>Small Molecule                   | binding of progesterone                               | 1.40E-02 | FKBP4                     | 1 |
| Biochemistry                                         | binding of progesterone                               | 1.40E-02 | FKBP4                     | 1 |
| Drug Metabolism                                      | binding of progesterone                               | 1.40E-02 | FKBP4                     | 1 |
| Endocrine System<br>Development and<br>Function      | binding of progesterone                               | 1.40E-02 | FKBP4                     | 1 |
| Cellular Growth and<br>Proliferation                 | generation of stem cells                              | 1.40E-02 | MYCL1                     | 1 |
| Tissue Development                                   | generation of stem cells                              | 1.40E-02 | MYCL1                     | 1 |
| Cellular Movement<br>Embryonic                       | migration of mesenchymal cells                        | 1.40E-02 | FKBP4                     | 1 |
| Development                                          | migration of mesenchymal cells                        | 1.40E-02 | FKBP4                     | 1 |
| Nucleic Acid<br>Metabolism                           | metabolism of nucleic acid component<br>or derivative | 1.54E-02 | ADRA2A,ATP6V1C2,CTNS,GNMT | 4 |
| Gastrointestinal<br>Disease                          | acute pancreatitis                                    | 1.55E-02 | MME                       | 1 |
| Inflammatory Disease                                 | acute pancreatitis                                    | 1.55E-02 | MME                       | 1 |
| Endocrine System<br>Disorders                        | acute pancreatitis                                    | 1.55E-02 | MME                       | 1 |

|                        |                         |          |          |   |
|------------------------|-------------------------|----------|----------|---|
| Cancer                 | cancer of mammary gland | 1.55E-02 | MMP7     | 1 |
| Reproductive System    |                         |          |          |   |
| Disease                | cancer of mammary gland | 1.55E-02 | MMP7     | 1 |
| Developmental          |                         |          |          |   |
| Disorder               | hypospadias             | 1.55E-02 | FKBP4    | 1 |
| Renal and Urological   |                         |          |          |   |
| Disease                | hypospadias             | 1.55E-02 | FKBP4    | 1 |
| Organismal Injury and  |                         |          |          |   |
| Abnormalities          | immobility of animal    | 1.55E-02 | ADRA2A   | 1 |
| Reproductive System    |                         |          |          |   |
| Disease                | priapism                | 1.55E-02 | ADRA2A   | 1 |
| Inflammatory Disease   | vasomotor rhinitis      | 1.55E-02 | ADRA2A   | 1 |
| Respiratory Disease    | vasomotor rhinitis      | 1.55E-02 | ADRA2A   | 1 |
| Developmental          |                         |          |          |   |
| Disorder               | atrial septal defect    | 1.70E-02 | ADRA2A   | 1 |
| Cardiovascular Disease | atrial septal defect    | 1.70E-02 | ADRA2A   | 1 |
| Respiratory Disease    | bronchospasm            | 1.70E-02 | ADRA2A   | 1 |
| Tissue Development     | development of sperm    | 1.70E-02 | PACRG    | 1 |
| Cellular Development   | development of sperm    | 1.70E-02 | PACRG    | 1 |
| Embryonic              |                         |          |          |   |
| Development            | development of sperm    | 1.70E-02 | PACRG    | 1 |
| Organismal             |                         |          |          |   |
| Development            | development of sperm    | 1.70E-02 | PACRG    | 1 |
| Reproductive System    |                         |          |          |   |
| Development and        |                         |          |          |   |
| Function               | development of sperm    | 1.70E-02 | PACRG    | 1 |
| Organ Development      | development of sperm    | 1.70E-02 | PACRG    | 1 |
| Organismal Injury and  |                         |          |          |   |
| Abnormalities          | failure of heart        | 1.70E-02 | ADRA2A   | 1 |
| Cardiovascular Disease | failure of heart        | 1.70E-02 | ADRA2A   | 1 |
| Reproductive System    |                         |          |          |   |
| Disease                | hairpin sperm flagellum | 1.70E-02 | FKBP4    | 1 |
| Gastrointestinal       |                         |          |          |   |
| Disease                | hepatorenal syndrome    | 1.70E-02 | ADRA2A   | 1 |
| Renal and Urological   |                         |          |          |   |
| Disease                | hepatorenal syndrome    | 1.70E-02 | ADRA2A   | 1 |
| Hepatic System         |                         |          |          |   |
| Disease                | hepatorenal syndrome    | 1.70E-02 | ADRA2A   | 1 |
| Renal and Urological   |                         |          |          |   |
| Disease                | diabetic nephropathy    | 1.73E-02 | HPGD,MME | 2 |
| Developmental          |                         |          |          |   |
| Disorder               | biliary atresia         | 1.86E-02 | MMP7     | 1 |
| Gastrointestinal       |                         |          |          |   |
| Disease                | biliary atresia         | 1.86E-02 | MMP7     | 1 |
| Hepatic System         |                         |          |          |   |
| Disease                | biliary atresia         | 1.86E-02 | MMP7     | 1 |
| Small Molecule         | metabolism of S-        |          |          |   |
| Biochemistry           | adenosylhomocysteine    | 1.86E-02 | GNMT     | 1 |
| Amino Acid             | metabolism of S-        |          |          |   |
| Metabolism             | adenosylhomocysteine    | 1.86E-02 | GNMT     | 1 |

|                                                       |                                               |          |                  |   |
|-------------------------------------------------------|-----------------------------------------------|----------|------------------|---|
| Nucleic Acid Metabolism                               | metabolism of S-adenosylhomocysteine          | 1.86E-02 | GNMT             | 1 |
| Endocrine System Disorders                            | pseudohermaphroditism                         | 1.86E-02 | FKBP4            | 1 |
| Immunological Disease                                 | immediate hypersensitivity                    | 1.87E-02 | ADRA2A,FKBP4,MME | 3 |
| Cell Morphology                                       | abnormal morphology of retinal ganglion cells | 2.01E-02 | SEMA5A           | 1 |
| Nervous System Development and Function               | abnormal morphology of retinal ganglion cells | 2.01E-02 | SEMA5A           | 1 |
| Tissue Morphology                                     | abnormal morphology of retinal ganglion cells | 2.01E-02 | SEMA5A           | 1 |
| Cellular Movement                                     | extravasation of plasma                       | 2.01E-02 | MME              | 1 |
| Hematological System Development and Function         | extravasation of plasma                       | 2.01E-02 | MME              | 1 |
| Cellular Development                                  | maturation of leukemia cell lines             | 2.01E-02 | SCIN             | 1 |
| Hematopoiesis                                         | maturation of leukemia cell lines             | 2.01E-02 | SCIN             | 1 |
| Neurological Disease                                  | memory deficits                               | 2.01E-02 | MME              | 1 |
| Molecular Transport                                   | release of neurotransmitter                   | 2.04E-02 | ADRA2A,SCIN      | 2 |
| Cell-To-Cell Signaling and Interaction                | release of neurotransmitter                   | 2.04E-02 | ADRA2A,SCIN      | 2 |
| Small Molecule Biochemistry                           | release of neurotransmitter                   | 2.04E-02 | ADRA2A,SCIN      | 2 |
| Lipid Metabolism                                      | conversion of lipid                           | 2.07E-02 | HPGD,PRDX6       | 2 |
| Small Molecule Biochemistry                           | conversion of lipid                           | 2.07E-02 | HPGD,PRDX6       | 2 |
| Cancer                                                | growth of tumor                               | 2.09E-02 | GNMT,MME,MMP7    | 3 |
| Neurological Disease                                  | Asperger syndrome                             | 2.16E-02 | ADRA2A           | 1 |
| Psychological Disorders                               | Asperger syndrome                             | 2.16E-02 | ADRA2A           | 1 |
| Neurological Disease                                  | cannabis dependence                           | 2.16E-02 | ADRA2A           | 1 |
| Psychological Disorders                               | cannabis dependence                           | 2.16E-02 | ADRA2A           | 1 |
| Cellular Growth and Proliferation                     | proliferation of myofibroblasts               | 2.16E-02 | MMP7             | 1 |
| Cellular Development                                  | proliferation of myofibroblasts               | 2.16E-02 | MMP7             | 1 |
| Skeletal and Muscular System Development and Function | proliferation of myofibroblasts               | 2.16E-02 | MMP7             | 1 |
| Molecular Transport                                   | quantity of fat                               | 2.16E-02 | ADRA2A           | 1 |
| Lipid Metabolism                                      | quantity of fat                               | 2.16E-02 | ADRA2A           | 1 |
| Small Molecule Biochemistry                           | quantity of fat                               | 2.16E-02 | ADRA2A           | 1 |
| Cell Morphology                                       | vacuolation of cytoplasm                      | 2.16E-02 | SH3GL2           | 1 |
| Cellular Compromise                                   | vacuolation of cytoplasm                      | 2.16E-02 | SH3GL2           | 1 |
| Immunological Disease                                 | allergy                                       | 2.18E-02 | ADRA2A,PRDX6     | 2 |

|                                                            |                                               |          |                  |   |
|------------------------------------------------------------|-----------------------------------------------|----------|------------------|---|
| Organ Morphology<br>Digestive System                       | abnormal morphology of hepatic sinusoid       | 2.32E-02 | GNMT             | 1 |
| Development and<br>Function<br>Hepatic System              | abnormal morphology of hepatic sinusoid       | 2.32E-02 | GNMT             | 1 |
| Development and<br>Function                                | abnormal morphology of hepatic sinusoid       | 2.32E-02 | GNMT             | 1 |
| Organ Morphology                                           | abnormal morphology of ventral prostatic lobe | 2.32E-02 | FKBP4            | 1 |
| Reproductive System<br>Development and<br>Function         | abnormal morphology of ventral prostatic lobe | 2.32E-02 | FKBP4            | 1 |
| Cancer                                                     | follicular adenoma                            | 2.32E-02 | PRDX6            | 1 |
| Cellular Function and<br>Maintenance                       | hyperpolarization of neurons                  | 2.32E-02 | ADRA2A           | 1 |
| Inflammatory Disease                                       | sinusitis                                     | 2.32E-02 | ADRA2A           | 1 |
| Respiratory Disease                                        | sinusitis                                     | 2.32E-02 | ADRA2A           | 1 |
| Behavior                                                   | cognition                                     | 2.45E-02 | CTNS,MME,SLC11A2 | 3 |
| Cardiovascular System<br>Development and<br>Function       | branching morphogenesis of vasculature        | 2.47E-02 | SEMA5A           | 1 |
| Embryonic<br>Development                                   | branching morphogenesis of vasculature        | 2.47E-02 | SEMA5A           | 1 |
| Carbohydrate<br>Metabolism                                 | degradation of proteoglycan                   | 2.47E-02 | MMP7             | 1 |
| Small Molecule<br>Biochemistry                             | degradation of proteoglycan                   | 2.47E-02 | MMP7             | 1 |
| Skeletal and Muscular<br>Disorders                         | skelatal muscle spasticity                    | 2.47E-02 | ADRA2A           | 1 |
| Cancer                                                     | tumor tissue                                  | 2.47E-02 | MMP7             | 1 |
| Organismal Injury and<br>Abnormalities                     | tumor tissue                                  | 2.47E-02 | MMP7             | 1 |
| Post-Translational<br>Modification                         | N-glycosylation of protein                    | 2.62E-02 | MAN1C1           | 1 |
| Neurological Disease<br>Psychological<br>Disorders         | bipolar II disorder                           | 2.62E-02 | ADRA2A           | 1 |
|                                                            | bipolar II disorder                           | 2.62E-02 | ADRA2A           | 1 |
| Cellular Compromise                                        | damage of endothelial cells                   | 2.62E-02 | PRDX6            | 1 |
| Tissue Development<br>Embryonic<br>Development             | development of prostate gland                 | 2.62E-02 | FKBP4            | 1 |
| Organismal<br>Development                                  | development of prostate gland                 | 2.62E-02 | FKBP4            | 1 |
|                                                            | development of prostate gland                 | 2.62E-02 | FKBP4            | 1 |
| Reproductive System<br>Development and<br>Function         | development of prostate gland                 | 2.62E-02 | FKBP4            | 1 |
| Organ Development<br>Cellular Assembly and<br>Organization | development of prostate gland                 | 2.62E-02 | FKBP4            | 1 |
|                                                            | distribution of mitochondria                  | 2.62E-02 | BHLHA15          | 1 |

|                                                                  |                                                                              |                      |                        |        |
|------------------------------------------------------------------|------------------------------------------------------------------------------|----------------------|------------------------|--------|
| Cancer                                                           | growth of hepatocellular carcinoma<br>paroxysmal supraventricular            | 2.62E-02             | GNMT                   | 1      |
| Cardiovascular Disease                                           | tachycardia                                                                  | 2.62E-02             | ADRA2A                 | 1      |
| Lipid Metabolism<br>Small Molecule                               | catabolism of phospholipid                                                   | 2.77E-02             | PRDX6                  | 1      |
| Biochemistry                                                     | catabolism of phospholipid                                                   | 2.77E-02             | PRDX6                  | 1      |
| Organismal Injury and<br>Abnormalities                           | microgliosis                                                                 | 2.77E-02             | MME                    | 1      |
| Neurological Disease                                             | microgliosis                                                                 | 2.77E-02             | MME                    | 1      |
| Molecular Transport<br>Small Molecule                            | concentration of cyclic AMP                                                  | 2.89E-02             | ADRA2A,AZGP1           | 2      |
| Biochemistry<br>Nucleic Acid                                     | concentration of cyclic AMP                                                  | 2.89E-02             | ADRA2A,AZGP1           | 2      |
| Metabolism                                                       | concentration of cyclic AMP                                                  | 2.89E-02             | ADRA2A,AZGP1           | 2      |
| Cell Signaling                                                   | concentration of cyclic AMP                                                  | 2.89E-02             | ADRA2A,AZGP1           | 2      |
| Respiratory Disease                                              | obstructive sleep apnea                                                      | 2.92E-02             | ADRA2A                 | 1      |
| Cell Morphology<br>Nervous System<br>Development and<br>Function | abnormal morphology of bipolar cells<br>abnormal morphology of bipolar cells | 3.08E-02<br>3.08E-02 | SEMA5A<br>SEMA5A       | 1<br>1 |
| Tissue Morphology                                                | abnormal morphology of bipolar cells                                         | 3.08E-02             | SEMA5A                 | 1      |
| Organ Morphology                                                 | abnormal morphology of prostate<br>gland                                     | 3.08E-02<br>3.08E-02 | FKBP4                  | 1      |
| Reproductive System<br>Development and<br>Function               | abnormal morphology of prostate<br>gland                                     | 3.08E-02<br>3.08E-02 | FKBP4                  | 1      |
| Organismal Injury and<br>Abnormalities                           | fibrosis of left ventricle                                                   | 3.08E-02             | ADRA2A                 | 1      |
| Cardiovascular Disease                                           | fibrosis of left ventricle                                                   | 3.08E-02             | ADRA2A                 | 1      |
| Reproductive System<br>Development and<br>Function               | function of uterus                                                           | 3.08E-02             | FKBP4                  | 1      |
| Organ Development                                                | function of uterus                                                           | 3.08E-02             | FKBP4                  | 1      |
| Neurological Disease                                             | dyskinesia                                                                   | 3.09E-02             | ADRA2A,DBP,FKBP4,PRDX6 | 4      |
| Carbohydrate<br>Metabolism                                       | homeostasis of D-glucose                                                     | 3.14E-02             | ADRA2A,BHLHA15         | 2      |
| Cellular Function and<br>Maintenance                             | homeostasis of D-glucose                                                     | 3.14E-02             | ADRA2A,BHLHA15         | 2      |
| Small Molecule<br>Biochemistry                                   | homeostasis of D-glucose                                                     | 3.14E-02             | ADRA2A,BHLHA15         | 2      |
| Hematological Disease                                            | Budd-Chiari syndrome                                                         | 3.23E-02             | MMP7                   | 1      |
| Cardiovascular Disease                                           | Budd-Chiari syndrome                                                         | 3.23E-02             | MMP7                   | 1      |
| Free Radical<br>Scavenging<br>Small Molecule                     | catabolism of hydrogen peroxide                                              | 3.23E-02             | PRDX6                  | 1      |
| Biochemistry                                                     | catabolism of hydrogen peroxide                                              | 3.23E-02             | PRDX6                  | 1      |
| Hereditary Disorder                                              | hebephrenic schizizophrenia                                                  | 3.23E-02             | ADRA2A                 | 1      |

|                                                                                |                                     |          |             |   |
|--------------------------------------------------------------------------------|-------------------------------------|----------|-------------|---|
| Neurological Disease<br>Psychological<br>Disorders                             | hebephrenic schizophrenia           | 3.23E-02 | ADRA2A      | 1 |
| Reproductive System<br>Disease                                                 | hebephrenic schizophrenia           | 3.23E-02 | ADRA2A      | 1 |
| Lipid Metabolism<br>Small Molecule<br>Biochemistry                             | impotence                           | 3.23E-02 | ADRA2A      | 1 |
|                                                                                | metabolism of arachidonic acid      | 3.23E-02 | DBP         | 1 |
|                                                                                | metabolism of arachidonic acid      | 3.23E-02 | DBP         | 1 |
| Inflammatory Disease<br>Auditory Disease<br>Post-Translational<br>Modification | otitis media                        | 3.23E-02 | ADRA2A      | 1 |
|                                                                                | otitis media                        | 3.23E-02 | ADRA2A      | 1 |
|                                                                                | oxidation of protein                | 3.23E-02 | PRDX6       | 1 |
| Protein Degradation<br>Developmental<br>Disorder                               | oxidation of protein                | 3.23E-02 | PRDX6       | 1 |
|                                                                                | hypertrophy of heart                | 3.37E-02 | ADRA2A,MMP7 | 2 |
| Cardiovascular Disease                                                         | hypertrophy of heart                | 3.37E-02 | ADRA2A,MMP7 | 2 |
| Cell Signaling                                                                 | androgen receptor signaling pathway | 3.38E-02 | FKBP4       | 1 |
| Cell Death and Survival                                                        | cell viability of macrophages       | 3.38E-02 | PRDX6       | 1 |
| Hematological System<br>Development and<br>Function                            | cell viability of macrophages       | 3.38E-02 | PRDX6       | 1 |
| Cellular Assembly and<br>Organization                                          | endocytosis of synaptic vesicles    | 3.38E-02 | SH3GL2      | 1 |
| Cellular Function and<br>Maintenance                                           | endocytosis of synaptic vesicles    | 3.38E-02 | SH3GL2      | 1 |
| Cellular Movement                                                              | endocytosis of synaptic vesicles    | 3.38E-02 | SH3GL2      | 1 |
| Nervous System<br>Development and<br>Function                                  | endocytosis of synaptic vesicles    | 3.38E-02 | SH3GL2      | 1 |
| Cellular Assembly and<br>Organization                                          | formation of amyloid fibrils        | 3.38E-02 | MME         | 1 |
| Tissue Development                                                             | formation of amyloid fibrils        | 3.38E-02 | MME         | 1 |
| Hereditary Disorder                                                            | paranoid schizophrenia              | 3.38E-02 | ADRA2A      | 1 |
| Neurological Disease<br>Psychological<br>Disorders                             | paranoid schizophrenia              | 3.38E-02 | ADRA2A      | 1 |
|                                                                                | paranoid schizophrenia              | 3.38E-02 | ADRA2A      | 1 |
| Organismal Injury and<br>Abnormalities                                         | poikilocytosis                      | 3.38E-02 | SLC11A2     | 1 |
| Hematological Disease                                                          | poikilocytosis                      | 3.38E-02 | SLC11A2     | 1 |
| Cell Morphology                                                                | shape change of blood platelets     | 3.38E-02 | ADRA2A      | 1 |
| Inflammatory<br>Response                                                       | shape change of blood platelets     | 3.38E-02 | ADRA2A      | 1 |
| Hematological System<br>Development and<br>Function                            | shape change of blood platelets     | 3.38E-02 | ADRA2A      | 1 |
| Small Molecule<br>Biochemistry                                                 | synthesis of heme                   | 3.38E-02 | SLC11A2     | 1 |



|                                              |                             |          |                 |   |
|----------------------------------------------|-----------------------------|----------|-----------------|---|
| Dermatological Diseases and Conditions       | urticaria                   | 3.38E-02 | ADRA2A          | 1 |
| Immunological Disease                        | urticaria                   | 3.38E-02 | ADRA2A          | 1 |
| Developmental Disorder                       | cryptorchidism              | 3.53E-02 | FKBP4           | 1 |
| Endocrine System Disorders                   | cryptorchidism              | 3.53E-02 | FKBP4           | 1 |
| Reproductive System Disease                  | cryptorchidism              | 3.53E-02 | FKBP4           | 1 |
| Tissue Development Embryonic Development     | development of yolk sac     | 3.53E-02 | ADRA2A          | 1 |
| Organismal Development                       | development of yolk sac     | 3.53E-02 | ADRA2A          | 1 |
| Dermatological Diseases and Conditions       | formation of ulcer          | 3.53E-02 | MMP7            | 1 |
| Gastrointestinal Disease                     | formation of ulcer          | 3.53E-02 | MMP7            | 1 |
| Organismal Injury and Abnormalities          | formation of ulcer          | 3.53E-02 | MMP7            | 1 |
| Cellular Assembly and Organization           | quantity of amyloid fibrils | 3.53E-02 | MME             | 1 |
| Cellular Assembly and Organization           | remodeling of cytoskeleton  | 3.53E-02 | PTPRD           | 1 |
| Cancer                                       | carcinoma in situ           | 3.54E-02 | MMP7,MYCL1      | 2 |
| Neurological Disease                         | major depression            | 3.57E-02 | ADRA2A,FKBP4    | 2 |
| Psychological Disorders                      | major depression            | 3.57E-02 | ADRA2A,FKBP4    | 2 |
| Molecular Transport                          | quantity of steroid         | 3.64E-02 | FKBP4,GNMT,HPGD | 3 |
| Lipid Metabolism                             | quantity of steroid         | 3.64E-02 | FKBP4,GNMT,HPGD | 3 |
| Small Molecule Biochemistry                  | quantity of steroid         | 3.64E-02 | FKBP4,GNMT,HPGD | 3 |
| Dermatological Diseases and Conditions       | angioedema                  | 3.68E-02 | ADRA2A          | 1 |
| Organismal Injury and Abnormalities          | angioedema                  | 3.68E-02 | ADRA2A          | 1 |
| Immunological Disease                        | angioedema                  | 3.68E-02 | ADRA2A          | 1 |
| Organismal Injury and Abnormalities          | hot flashes                 | 3.68E-02 | ADRA2A          | 1 |
| Reproductive System Development and Function | parturition                 | 3.68E-02 | HPGD            | 1 |
| Post-Translational Modification              | hydrolysis of protein       | 3.74E-02 | MME,MMP7        | 2 |
| Protein Degradation                          | hydrolysis of protein       | 3.74E-02 | MME,MMP7        | 2 |
| Protein Synthesis                            | hydrolysis of protein       | 3.74E-02 | MME,MMP7        | 2 |
| Organ Morphology                             | mass of seminal vesicle     | 3.83E-02 | FKBP4           | 1 |
| Organismal Development                       | mass of seminal vesicle     | 3.83E-02 | FKBP4           | 1 |

|                                                                            |                                                                                |                      |                            |             |
|----------------------------------------------------------------------------|--------------------------------------------------------------------------------|----------------------|----------------------------|-------------|
| Reproductive System<br>Development and<br>Function                         | mass of seminal vesicle                                                        | 3.83E-02             | FKBP4                      | 1           |
| Organismal Injury and<br>Abnormalities                                     | neurodegeneration of hippocampus                                               | 3.83E-02             | MME                        | 1           |
| Neurological Disease<br>Post-Translational<br>Modification                 | neurodegeneration of hippocampus<br>proteolysis of Gelatin                     | 3.83E-02             | MME                        | 1           |
| Protein Degradation                                                        | proteolysis of Gelatin                                                         | 3.83E-02             | MMP7                       | 1           |
| Protein Synthesis                                                          | proteolysis of Gelatin                                                         | 3.83E-02             | MMP7                       | 1           |
| Cancer<br>Gastrointestinal<br>Disease                                      | acinar-cell carcinoma<br>acinar-cell carcinoma                                 | 3.98E-02             | AZGP1                      | 1           |
| Endocrine System<br>Disorders                                              | acinar-cell carcinoma                                                          | 3.98E-02             | AZGP1                      | 1           |
| Inflammatory<br>Response                                                   | acute inflammatory response                                                    | 3.98E-02             | ADRA2A                     | 1           |
| Inflammatory Disease<br>Inflammatory<br>Response                           | allergic pulmonary eosinophilia<br>allergic pulmonary eosinophilia             | 3.98E-02             | PRDX6                      | 1           |
| Respiratory Disease                                                        | allergic pulmonary eosinophilia                                                | 3.98E-02             | PRDX6                      | 1           |
| Hematological Disease<br>Immunological<br>Disease                          | allergic pulmonary eosinophilia<br>allergic pulmonary eosinophilia             | 3.98E-02             | PRDX6                      | 1           |
| Neurological Disease<br>Psychological<br>Disorders                         | vascular dementia<br>vascular dementia                                         | 3.98E-02             | ADRA2A                     | 1           |
| Cardiovascular Disease                                                     | vascular dementia                                                              | 3.98E-02             | ADRA2A                     | 1           |
| Cell Death and Survival                                                    | apoptosis of epithelial cells                                                  | 4.02E-02             | FKBP4,PRDX6                | 2           |
| Hematological Disease<br>Molecular Transport<br>Free Radical<br>Scavenging | anisocytosis<br>quantity of hydrogen peroxide<br>quantity of hydrogen peroxide | 4.13E-02             | SLC11A2<br>PRDX6<br>PRDX6  | 1<br>1<br>1 |
| Reproductive System<br>Development and<br>Function                         | decidualization                                                                | 4.28E-02             | FKBP4                      | 1           |
| Gastrointestinal<br>Disease                                                | degeneration of liver                                                          | 4.28E-02             | GNMT                       | 1           |
| Organismal Injury and<br>Abnormalities                                     | degeneration of liver                                                          | 4.28E-02             | GNMT                       | 1           |
| Hepatic System<br>Disease                                                  | degeneration of liver                                                          | 4.28E-02             | GNMT                       | 1           |
| Neurological Disease<br>Carbohydrate<br>Metabolism                         | sedation<br>quantity of carbohydrate                                           | 4.28E-02             | ADRA2A                     | 1           |
| Organ Morphology                                                           | abnormal morphology of seminal<br>vesicle                                      | 4.42E-02<br>4.43E-02 | ADRA2A,GNMT,PRDX6<br>FKBP4 | 3<br>1      |

|                                                              |                                                       |          |                      |        |
|--------------------------------------------------------------|-------------------------------------------------------|----------|----------------------|--------|
| Reproductive System<br>Development and<br>Function           | abnormal morphology of seminal<br>vesicle             | 4.43E-02 | FKBP4                | 1      |
| Renal and Urological<br>Disease                              | acute kidney injury                                   | 4.43E-02 | ADRA2A               | 1      |
| Cardiovascular Disease                                       | atrial flutter                                        | 4.43E-02 | ADRA2A               | 1      |
| Neurological Disease                                         | essential tremor                                      | 4.43E-02 | ADRA2A               | 1      |
| Cardiovascular Disease                                       | bradycardia                                           | 4.58E-02 | ADRA2A               | 1      |
| Ophthalmic Disease                                           | hypertension of eye                                   | 4.58E-02 | ADRA2A               | 1      |
| Cardiovascular Disease                                       | hypertension of eye                                   | 4.58E-02 | ADRA2A               | 1      |
| Inflammatory<br>Response                                     | inflammation of brain                                 | 4.58E-02 | MME                  | 1      |
| Cellular Movement<br>Small Molecule                          | invasion of pancreatic cancer cell lines              | 4.58E-02 | AZGP1                | 1      |
| Biochemistry<br>Nucleic Acid                                 | metabolism of nucleotide                              | 4.59E-02 | ADRA2A,ATP6V1C2,CTNS | 3      |
| Metabolism                                                   | metabolism of nucleotide                              | 4.59E-02 | ADRA2A,ATP6V1C2,CTNS | 3      |
| Cellular Assembly and<br>Organization                        | branching morphogenesis of tubules                    | 4.73E-02 | SEMA5A               | 1      |
| Tissue Development<br>Embryonic                              | branching morphogenesis of tubules                    | 4.73E-02 | SEMA5A               | 1      |
| Development                                                  | branching morphogenesis of tubules                    | 4.73E-02 | SEMA5A               | 1      |
| Cardiovascular Disease<br>Post-Translational<br>Modification | chronic heart failure<br>cleavage of protein fragment | 4.73E-02 | ADRA2A<br>MMP7       | 1<br>1 |
| Protein Degradation                                          | cleavage of protein fragment                          | 4.73E-02 | MMP7                 | 1      |
| Protein Synthesis                                            | cleavage of protein fragment                          | 4.73E-02 | MMP7                 | 1      |
| Neurological Disease                                         | diabetic neuropathy                                   | 4.73E-02 | ADRA2A               | 1      |
| Cancer                                                       | pheochromocytoma                                      | 4.73E-02 | ADRA2A               | 1      |
| Molecular Transport                                          | release of 5-hydroxytryptamine                        | 4.73E-02 | SCIN                 | 1      |
| Cell-To-Cell Signaling<br>and Interaction<br>Small Molecule  | release of 5-hydroxytryptamine                        | 4.73E-02 | SCIN                 | 1      |
| Biochemistry                                                 | release of 5-hydroxytryptamine                        | 4.73E-02 | SCIN                 | 1      |
| Molecular Transport                                          | release of norepinephrine                             | 4.73E-02 | ADRA2A               | 1      |
| Cell-To-Cell Signaling<br>and Interaction<br>Small Molecule  | release of norepinephrine                             | 4.73E-02 | ADRA2A               | 1      |
| Biochemistry                                                 | release of norepinephrine                             | 4.73E-02 | ADRA2A               | 1      |
| Drug Metabolism                                              | release of norepinephrine                             | 4.73E-02 | ADRA2A               | 1      |
| Molecular Transport                                          | secretion of norepinephrine                           | 4.73E-02 | ADRA2A               | 1      |
| Cell-To-Cell Signaling<br>and Interaction<br>Small Molecule  | secretion of norepinephrine                           | 4.73E-02 | ADRA2A               | 1      |
| Biochemistry                                                 | secretion of norepinephrine                           | 4.73E-02 | ADRA2A               | 1      |

|                                                                 |                                            |          |          |   |
|-----------------------------------------------------------------|--------------------------------------------|----------|----------|---|
| Drug Metabolism                                                 | secretion of norepinephrine                | 4.73E-02 | ADRA2A   | 1 |
| Organ Morphology                                                | abnormal morphology of inner nuclear layer | 4.88E-02 | SEMA5A   | 1 |
|                                                                 | abnormal morphology of inner nuclear layer | 4.88E-02 | SEMA5A   | 1 |
| Tissue Development Embryonic                                    | abnormal morphology of inner nuclear layer | 4.88E-02 | SEMA5A   | 1 |
|                                                                 | abnormal morphology of inner nuclear layer | 4.88E-02 | SEMA5A   | 1 |
| Organismal Development                                          | abnormal morphology of inner nuclear layer | 4.88E-02 | SEMA5A   | 1 |
|                                                                 | abnormal morphology of inner nuclear layer | 4.88E-02 | SEMA5A   | 1 |
| Organ Development Visual System                                 | abnormal morphology of inner nuclear layer | 4.88E-02 | SEMA5A   | 1 |
|                                                                 | abnormal morphology of inner nuclear layer | 4.88E-02 | SEMA5A   | 1 |
| Development and Function Connective Tissue Disorders            | adjuvant arthritis                         | 4.88E-02 | AZGP1    | 1 |
|                                                                 | adjuvant arthritis                         | 4.88E-02 | AZGP1    | 1 |
| Inflammatory Disease Skeletal and Muscular Disorders            | adjuvant arthritis                         | 4.88E-02 | AZGP1    | 1 |
|                                                                 | adjuvant arthritis                         | 4.88E-02 | AZGP1    | 1 |
| Cell Death and Survival Nervous System Development and Function | cell viability of cortical neurons         | 4.88E-02 | SLC11A2  | 1 |
|                                                                 | cell viability of cortical neurons         | 4.88E-02 | SLC11A2  | 1 |
| Neurological Disease Tissue Morphology                          | dystonia                                   | 4.88E-02 | ADRA2A   | 1 |
|                                                                 | morphology of interstitial tissue          | 4.88E-02 | MMP7     | 1 |
| Lipid Metabolism Small Molecule Biochemistry                    | metabolism of eicosanoid                   | 4.95E-02 | DBP,HPGD | 2 |
|                                                                 | metabolism of eicosanoid                   | 4.95E-02 | DBP,HPGD | 2 |

### PTEN Loss Down, ERG Up

| Category                                                           | Term                                             | Count    | P-Value           | Genes |
|--------------------------------------------------------------------|--------------------------------------------------|----------|-------------------|-------|
| Connective Tissue Development and Function                         | abnormal morphology of basisphenoid bone foramen | 1.80E-04 | BMP7,PKDCC        | 2     |
|                                                                    | abnormal morphology of basisphenoid bone foramen | 1.80E-04 | BMP7,PKDCC        | 2     |
| Embryonic Development                                              | abnormal morphology of basisphenoid bone foramen | 1.80E-04 | BMP7,PKDCC        | 2     |
|                                                                    | abnormal morphology of basisphenoid bone foramen | 1.80E-04 | BMP7,PKDCC        | 2     |
| Organ Development                                                  | abnormal morphology of basisphenoid bone foramen | 1.80E-04 | BMP7,PKDCC        | 2     |
|                                                                    | abnormal morphology of basisphenoid bone foramen | 1.80E-04 | BMP7,PKDCC        | 2     |
| Organ Morphology Organismal Development                            | abnormal morphology of basisphenoid bone foramen | 1.80E-04 | BMP7,PKDCC        | 2     |
|                                                                    | abnormal morphology of basisphenoid bone foramen | 1.80E-04 | BMP7,PKDCC        | 2     |
| Skeletal and Muscular System Development and Function              | abnormal morphology of basisphenoid bone foramen | 1.80E-04 | BMP7,PKDCC        | 2     |
|                                                                    | abnormal morphology of basisphenoid bone foramen | 1.80E-04 | BMP7,PKDCC        | 2     |
| Tissue Development                                                 | abnormal morphology of basisphenoid bone foramen | 1.80E-04 | BMP7,PKDCC        | 2     |
| Cell-To-Cell Signaling and Interaction Small Molecule Biochemistry | metabolism of neurotransmitter                   | 4.89E-04 | CCDC92,COMT,NR4A2 | 3     |
|                                                                    | metabolism of neurotransmitter                   | 4.89E-04 | CCDC92,COMT,NR4A2 | 3     |
| Organ Morphology                                                   | abnormal morphology of acinar gland cells        | 6.52E-04 | ATF4,ITPR2        | 2     |

|                                   |                                             |          |                           |   |
|-----------------------------------|---------------------------------------------|----------|---------------------------|---|
| Cell Morphology                   | abnormal morphology of acinar gland cells   | 6.52E-04 | ATF4,ITPR2                | 2 |
| Endocrine System                  |                                             |          |                           |   |
| Development and Function          | abnormal morphology of acinar gland cells   | 6.52E-04 | ATF4,ITPR2                | 2 |
| Organ Morphology                  | abnormal morphology of substantia nigra     | 7.80E-04 | HYOU1,NR4A2               | 2 |
| Nervous System                    |                                             |          |                           |   |
| Development and Function          | abnormal morphology of substantia nigra     | 7.80E-04 | HYOU1,NR4A2               | 2 |
| Ophthalmic Disease                | aphakia                                     | 1.07E-03 | ATF4,BMP7                 | 2 |
| Cell Morphology                   | morphology of prostate cancer cell lines    | 1.23E-03 | BMP7,GDF15                | 2 |
| Organ Morphology                  | morphology of exocrine cells                | 1.27E-03 | AGR2,ATF4,ITPR2           | 3 |
| Cell Morphology                   | morphology of exocrine cells                | 1.27E-03 | AGR2,ATF4,ITPR2           | 3 |
| Cell Signaling                    | activation of enzyme                        | 1.89E-03 | GMFG,NR4A2,SEC14L2        | 3 |
| Cellular Development              | proliferation of prostate cell lines        | 2.21E-03 | BMP7,SEC14L2              | 2 |
| Cellular Growth and Proliferation | proliferation of prostate cell lines        | 2.21E-03 | BMP7,SEC14L2              | 2 |
| Reproductive System               |                                             |          |                           |   |
| Development and Function          | proliferation of prostate cell lines        | 2.21E-03 | BMP7,SEC14L2              | 2 |
| Cellular Movement                 | cell movement of prostate cancer cell lines | 2.31E-03 | AGR2,BMP7,GDF15           | 3 |
| Cardiovascular Disease            | ischemia of brain                           | 2.49E-03 | GPX3,HYOU1,TINAGL1        | 3 |
| Neurological Disease              | ischemia of brain                           | 2.49E-03 | GPX3,HYOU1,TINAGL1        | 3 |
| Tissue Morphology                 | abnormal morphology of xiphoid process      | 3.18E-03 | BMP7,PKDCC                | 2 |
| Ophthalmic Disease                | Alstrom's syndrome                          | 3.51E-03 | ALMS1                     | 1 |
| Neurological Disease              | Alstrom's syndrome                          | 3.51E-03 | ALMS1                     | 1 |
| Hereditary Disorder               | Alstrom's syndrome                          | 3.51E-03 | ALMS1                     | 1 |
| Nervous System                    |                                             |          |                           |   |
| Development and Function          | aplasia of optic nerve                      | 3.51E-03 | BMP7                      | 1 |
| Ophthalmic Disease                | aplasia of optic nerve                      | 3.51E-03 | BMP7                      | 1 |
| Neurological Disease              | aplasia of optic nerve                      | 3.51E-03 | BMP7                      | 1 |
| Developmental Disorder            | aplasia of optic nerve                      | 3.51E-03 | BMP7                      | 1 |
| Cell Death and Survival           | apoptosis of oviduct cells                  | 3.51E-03 | BMP7                      | 1 |
| Cancer                            | autosomal dominant polycystic liver disease | 3.51E-03 | SEC63 (includes EG:11231) | 1 |
| Developmental Disorder            | autosomal dominant polycystic liver disease | 3.51E-03 | SEC63 (includes EG:11231) | 1 |
| Gastrointestinal Disease          | autosomal dominant polycystic liver disease | 3.51E-03 | SEC63 (includes EG:11231) | 1 |
| Hepatic System                    | autosomal dominant polycystic liver disease | 3.51E-03 | SEC63 (includes EG:11231) | 1 |
| Disease                           | autosomal dominant polycystic liver disease | 3.51E-03 | SEC63 (includes EG:11231) | 1 |
| Hereditary Disorder               | autosomal dominant polycystic liver disease | 3.51E-03 | SEC63 (includes EG:11231) | 1 |
| Cell Death and Survival           | cell death of lymphoblastoid cells          | 3.51E-03 | COMT                      | 1 |

|                                               |                                                         |          |       |   |
|-----------------------------------------------|---------------------------------------------------------|----------|-------|---|
| Embryonic Development                         | cell division of mesenchymal cells                      | 3.51E-03 | BMP7  | 1 |
| Cell Cycle                                    | cell division of mesenchymal cells                      | 3.51E-03 | BMP7  | 1 |
| Small Molecule                                |                                                         |          |       |   |
| Biochemistry                                  | degradation of epinephrine                              | 3.51E-03 | COMT  | 1 |
| Embryonic Development                         | development of hyaloid artery                           | 3.51E-03 | BMP7  | 1 |
| Organismal Development                        | development of hyaloid artery                           | 3.51E-03 | BMP7  | 1 |
| Tissue Development                            | development of hyaloid artery                           | 3.51E-03 | BMP7  | 1 |
| Embryonic Development                         | differentiation of metanephric mesenchyme               | 3.51E-03 | BMP7  | 1 |
| Tissue Development                            | differentiation of metanephric mesenchyme               | 3.51E-03 | BMP7  | 1 |
| Cellular Development                          | differentiation of metanephric mesenchyme               | 3.51E-03 | BMP7  | 1 |
| Cell-To-Cell Signaling and Interaction        | elimination of dopamine                                 | 3.51E-03 | COMT  | 1 |
| Small Molecule                                |                                                         |          |       |   |
| Biochemistry                                  | elimination of dopamine                                 | 3.51E-03 | COMT  | 1 |
| Drug Metabolism                               | elimination of dopamine                                 | 3.51E-03 | COMT  | 1 |
| Cell Cycle                                    | entry into G2/M phase of prostate cancer cell lines     | 3.51E-03 | BMP7  | 1 |
| Nervous System Development and Function       | entry into differentiation of neuronal progenitor cells | 3.51E-03 | GATA2 | 1 |
| Cellular Development                          | entry into differentiation of neuronal progenitor cells | 3.51E-03 | GATA2 | 1 |
| Cell-To-Cell Signaling and Interaction        | excretion of dopamine                                   | 3.51E-03 | COMT  | 1 |
| Small Molecule                                |                                                         |          |       |   |
| Biochemistry                                  | excretion of dopamine                                   | 3.51E-03 | COMT  | 1 |
| Drug Metabolism                               | excretion of dopamine                                   | 3.51E-03 | COMT  | 1 |
| Molecular Transport                           | excretion of dopamine                                   | 3.51E-03 | COMT  | 1 |
| Embryonic Development                         | expansion of embryonic stem cell lines                  | 3.51E-03 | GATA2 | 1 |
| Cellular Development                          | expansion of embryonic stem cell lines                  | 3.51E-03 | GATA2 | 1 |
| Cellular Growth and Proliferation             | expansion of embryonic stem cell lines                  | 3.51E-03 | GATA2 | 1 |
| Embryonic Development                         | formation of embryonic stem cell lines                  | 3.51E-03 | GATA2 | 1 |
| Cellular Growth and Proliferation             | formation of embryonic stem cell lines                  | 3.51E-03 | GATA2 | 1 |
| Digestive System Development and Function     | formation of hard palate                                | 3.51E-03 | ASPH  | 1 |
| Cellular Growth and Proliferation             | formation of mast cells                                 | 3.51E-03 | GATA2 | 1 |
| Hematological System Development and Function | formation of mast cells                                 | 3.51E-03 | GATA2 | 1 |
| Inflammatory Response                         | formation of mast cells                                 | 3.51E-03 | GATA2 | 1 |

|                                                       |                                          |          |       |   |
|-------------------------------------------------------|------------------------------------------|----------|-------|---|
| Developmental Disorder                                | fructose-1,6-diphosphatase deficiency    | 3.51E-03 | FBP1  | 1 |
| Hereditary Disorder                                   | fructose-1,6-diphosphatase deficiency    | 3.51E-03 | FBP1  | 1 |
| Metabolic Disease                                     | fructose-1,6-diphosphatase deficiency    | 3.51E-03 | FBP1  | 1 |
| Cell-To-Cell Signaling and Interaction                | inactivation of dopamine                 | 3.51E-03 | COMT  | 1 |
| Small Molecule Biochemistry                           | inactivation of dopamine                 | 3.51E-03 | COMT  | 1 |
| Cell-To-Cell Signaling and Interaction                | inactivation of norepinephrine           | 3.51E-03 | COMT  | 1 |
| Small Molecule Biochemistry                           | inactivation of norepinephrine           | 3.51E-03 | COMT  | 1 |
| Connective Tissue Development and Function            | induction of long bones                  | 3.51E-03 | BMP7  | 1 |
| Embryonic Development                                 | induction of long bones                  | 3.51E-03 | BMP7  | 1 |
| Organ Development                                     | induction of long bones                  | 3.51E-03 | BMP7  | 1 |
| Organ Morphology                                      | induction of long bones                  | 3.51E-03 | BMP7  | 1 |
| Organismal Development                                | induction of long bones                  | 3.51E-03 | BMP7  | 1 |
| Skeletal and Muscular System Development and Function | induction of long bones                  | 3.51E-03 | BMP7  | 1 |
| Embryonic Development                                 | induction of metanephric mesenchyme      | 3.51E-03 | BMP7  | 1 |
| Organismal Development                                | induction of metanephric mesenchyme      | 3.51E-03 | BMP7  | 1 |
| Tissue Morphology                                     | induction of metanephric mesenchyme      | 3.51E-03 | BMP7  | 1 |
| Embryonic Development                                 | initiation of formation of optic fissure | 3.51E-03 | BMP7  | 1 |
| Organismal Development                                | initiation of formation of optic fissure | 3.51E-03 | BMP7  | 1 |
| Tissue Development                                    | initiation of formation of optic fissure | 3.51E-03 | BMP7  | 1 |
| Drug Metabolism                                       | linkage of glutathione                   | 3.51E-03 | GLRX  | 1 |
| Cell-To-Cell Signaling and Interaction                | localization of dopamine                 | 3.51E-03 | COMT  | 1 |
| Small Molecule Biochemistry                           | localization of dopamine                 | 3.51E-03 | COMT  | 1 |
| Drug Metabolism                                       | localization of dopamine                 | 3.51E-03 | COMT  | 1 |
| Molecular Transport                                   | localization of dopamine                 | 3.51E-03 | COMT  | 1 |
| Nervous System Development and Function               | loss of amacrine cells                   | 3.51E-03 | NR4A2 | 1 |
| Cell Death and Survival                               | loss of amacrine cells                   | 3.51E-03 | NR4A2 | 1 |
| Small Molecule Biochemistry                           | metabolism of L-dopa                     | 3.51E-03 | COMT  | 1 |

|                       |                                          |          |            |  |   |
|-----------------------|------------------------------------------|----------|------------|--|---|
| Amino Acid            |                                          |          |            |  |   |
| Metabolism            | metabolism of L-dopa                     | 3.51E-03 | COMT       |  | 1 |
| Drug Metabolism       | metabolism of L-dopa                     | 3.51E-03 | COMT       |  | 1 |
| Small Molecule        |                                          |          |            |  |   |
| Biochemistry          | methylation of 2-hydroxyestradiol        | 3.51E-03 | COMT       |  | 1 |
| Lipid Metabolism      | methylation of 2-hydroxyestradiol        | 3.51E-03 | COMT       |  | 1 |
| Small Molecule        |                                          |          |            |  |   |
| Biochemistry          | methylation of catecholamine             | 3.51E-03 | COMT       |  | 1 |
| Hereditary Disorder   | monocytopenia and mycobacterial          |          |            |  |   |
| Immunological         | infection syndrome                       | 3.51E-03 | GATA2      |  | 1 |
| Disease               | monocytopenia and mycobacterial          |          |            |  |   |
|                       | infection syndrome                       | 3.51E-03 | GATA2      |  | 1 |
| Skeletal and Muscular |                                          |          |            |  |   |
| System Development    |                                          |          |            |  |   |
| and Function          | onset of differentiation of osteoblasts  | 3.51E-03 | ATF4       |  | 1 |
| Cellular Development  | onset of differentiation of osteoblasts  | 3.51E-03 | ATF4       |  | 1 |
| Reproductive System   |                                          |          |            |  |   |
| Development and       |                                          |          |            |  |   |
| Function              | ovulation of oocytes                     | 3.51E-03 | BMP7       |  | 1 |
| Tissue Morphology     | quantity of spleen colony forming cells  | 3.51E-03 | GATA2      |  | 1 |
| Lymphoid Tissue       |                                          |          |            |  |   |
| Structure and         |                                          |          |            |  |   |
| Development           | quantity of spleen colony forming cells  | 3.51E-03 | GATA2      |  | 1 |
| Small Molecule        |                                          |          |            |  |   |
| Biochemistry          | release of homocysteine                  | 3.51E-03 | COMT       |  | 1 |
| Amino Acid            |                                          |          |            |  |   |
| Metabolism            | release of homocysteine                  | 3.51E-03 | COMT       |  | 1 |
| Cell Morphology       | repair of renal tubular epithelial cells | 3.51E-03 | BMP7       |  | 1 |
| Cellular Function and |                                          |          |            |  |   |
| Maintenance           | repair of renal tubular epithelial cells | 3.51E-03 | BMP7       |  | 1 |
| Nervous System        |                                          |          |            |  |   |
| Development and       |                                          |          |            |  |   |
| Function              | rotation of neurons                      | 3.51E-03 | GDF15      |  | 1 |
| Cellular Movement     | rotation of neurons                      | 3.51E-03 | GDF15      |  | 1 |
| Tissue Morphology     | thickening of carotid artery             | 3.51E-03 | ATF4       |  | 1 |
| Organismal Injury and |                                          |          |            |  |   |
| Abnormalities         | thickening of carotid artery             | 3.51E-03 | ATF4       |  | 1 |
| Cancer                | tumorigenesis of intestinal polyp        | 3.51E-03 | ASPH       |  | 1 |
| Gastrointestinal      |                                          |          |            |  |   |
| Disease               | tumorigenesis of intestinal polyp        | 3.51E-03 | ASPH       |  | 1 |
| Small Molecule        |                                          |          |            |  |   |
| Biochemistry          | utilization of 2-hydroxyestradiol        | 3.51E-03 | COMT       |  | 1 |
| Endocrine System      |                                          |          |            |  |   |
| Development and       |                                          |          |            |  |   |
| Function              | utilization of 2-hydroxyestradiol        | 3.51E-03 | COMT       |  | 1 |
| Lipid Metabolism      | utilization of 2-hydroxyestradiol        | 3.51E-03 | COMT       |  | 1 |
| Connective Tissue     |                                          |          |            |  |   |
| Development and       |                                          |          |            |  |   |
| Function              | abnormal morphology of radius            | 3.72E-03 | BMP7,PKDCC |  | 2 |
| Embryonic             |                                          |          |            |  |   |
| Development           | abnormal morphology of radius            | 3.72E-03 | BMP7,PKDCC |  | 2 |
| Organ Development     | abnormal morphology of radius            | 3.72E-03 | BMP7,PKDCC |  | 2 |



|                                                       |                                       |          |                                        |   |
|-------------------------------------------------------|---------------------------------------|----------|----------------------------------------|---|
| Organ Morphology                                      | abnormal morphology of radius         | 3.72E-03 | BMP7,PKDCC                             | 2 |
| Organismal Development                                | abnormal morphology of radius         | 3.72E-03 | BMP7,PKDCC                             | 2 |
| Skeletal and Muscular System Development and Function | abnormal morphology of radius         | 3.72E-03 | BMP7,PKDCC                             | 2 |
| Tissue Development                                    | abnormal morphology of radius         | 3.72E-03 | BMP7,PKDCC                             | 2 |
| Cell-To-Cell Signaling and Interaction                | metabolism of dopamine                | 4.01E-03 | COMT,NR4A2                             | 2 |
| Small Molecule Biochemistry                           | metabolism of dopamine                | 4.01E-03 | COMT,NR4A2                             | 2 |
| Drug Metabolism                                       | metabolism of dopamine                | 4.01E-03 | COMT,NR4A2                             | 2 |
| Connective Tissue Development and Function            | differentiation of adipocytes         | 4.32E-03 | ALMS1,BMP7,GATA2,WWTR1                 | 4 |
| Cellular Development                                  | differentiation of adipocytes         | 4.32E-03 | ALMS1,BMP7,GATA2,WWTR1                 | 4 |
| Connective Tissue Development and Function            | abnormal morphology of ulna           | 4.62E-03 | BMP7,PKDCC                             | 2 |
| Embryonic Development                                 | abnormal morphology of ulna           | 4.62E-03 | BMP7,PKDCC                             | 2 |
| Organ Development                                     | abnormal morphology of ulna           | 4.62E-03 | BMP7,PKDCC                             | 2 |
| Organ Morphology                                      | abnormal morphology of ulna           | 4.62E-03 | BMP7,PKDCC                             | 2 |
| Organismal Development                                | abnormal morphology of ulna           | 4.62E-03 | BMP7,PKDCC                             | 2 |
| Skeletal and Muscular System Development and Function | abnormal morphology of ulna           | 4.62E-03 | BMP7,PKDCC                             | 2 |
| Tissue Development                                    | abnormal morphology of ulna           | 4.62E-03 | BMP7,PKDCC                             | 2 |
| Cardiovascular Disease                                | ischemic injury of brain              | 4.62E-03 | GPX3,HYOU1                             | 2 |
| Neurological Disease                                  | ischemic injury of brain              | 4.62E-03 | GPX3,HYOU1                             | 2 |
| Organismal Injury and Abnormalities                   | ischemic injury of brain              | 4.62E-03 | GPX3,HYOU1                             | 2 |
| Protein Synthesis                                     | polymerization of protein             | 4.79E-03 | AKAP2/PALM2-AKAP2,CCDC92,EVL,FBP1,GPX3 | 5 |
| Cellular Development                                  | differentiation of stem cells         | 4.92E-03 | BMP7,GATA2,NR4A2,WWTR1                 | 4 |
| Cellular Function and Maintenance                     | endoplasmic reticulum stress response | 5.20E-03 | ATF4,ERN1,HYOU1                        | 3 |
| Cellular Compromise                                   | endoplasmic reticulum stress response | 5.20E-03 | ATF4,ERN1,HYOU1                        | 3 |
| Embryonic Development                                 | development of lens                   | 5.27E-03 | ATF4,BMP7                              | 2 |
| Organ Development                                     | development of lens                   | 5.27E-03 | ATF4,BMP7                              | 2 |
| Organismal Development                                | development of lens                   | 5.27E-03 | ATF4,BMP7                              | 2 |
| Tissue Development                                    | development of lens                   | 5.27E-03 | ATF4,BMP7                              | 2 |

|                                              |                                                     |          |            |   |
|----------------------------------------------|-----------------------------------------------------|----------|------------|---|
| Visual System<br>Development and<br>Function | development of lens                                 | 5.27E-03 | ATF4,BMP7  | 2 |
| Cell Death and Survival<br>Small Molecule    | apoptosis of endothelial cell lines                 | 5.95E-03 | ERN1,HYOU1 | 2 |
| Biochemistry                                 | activation of arachidonic acid                      | 7.01E-03 | ACSL4      | 1 |
| Lipid Metabolism                             | activation of arachidonic acid                      | 7.01E-03 | ACSL4      | 1 |
| Embryonic<br>Development                     | aggregation of mesenchymal cells                    | 7.01E-03 | BMP7       | 1 |
| Tissue Development                           | aggregation of mesenchymal cells                    | 7.01E-03 | BMP7       | 1 |
| Cell-To-Cell Signaling<br>and Interaction    | aggregation of mesenchymal cells                    | 7.01E-03 | BMP7       | 1 |
| Cell Death and Survival                      | anoikis of cancer cells                             | 7.01E-03 | NR4A2      | 1 |
| Tumor Morphology                             | anoikis of cancer cells                             | 7.01E-03 | NR4A2      | 1 |
| Gene Expression                              | binding of MEF2-binding element                     | 7.01E-03 | BMP7       | 1 |
| Cell-To-Cell Signaling<br>and Interaction    | binding of fibrosarcoma cell lines                  | 7.01E-03 | IL1R2      | 1 |
| Cardiovascular Disease                       | calcification of aorta                              | 7.01E-03 | BMP7       | 1 |
| Cell Death and Survival                      | clearance of Haemophilus influenzae                 | 7.01E-03 | SPON2      | 1 |
| Cellular Function and<br>Maintenance         | clearance of Haemophilus influenzae                 | 7.01E-03 | SPON2      | 1 |
| Small Molecule<br>Biochemistry               | degradation of L-dopa                               | 7.01E-03 | COMT       | 1 |
| Amino Acid<br>Metabolism                     | degradation of L-dopa                               | 7.01E-03 | COMT       | 1 |
| Drug Metabolism                              | degradation of L-dopa                               | 7.01E-03 | COMT       | 1 |
| Cell-To-Cell Signaling<br>and Interaction    | degradation of norepinephrine                       | 7.01E-03 | COMT       | 1 |
| Small Molecule<br>Biochemistry               | degradation of norepinephrine                       | 7.01E-03 | COMT       | 1 |
| Cellular Development                         | epithelial-mesenchymal transition of<br>fibroblasts | 7.01E-03 | BMP7       | 1 |
| Organismal Injury and<br>Abnormalities       | fibrosis of renal glomerulus                        | 7.01E-03 | BMP7       | 1 |
| Renal and Urological<br>Disease              | fibrosis of renal glomerulus                        | 7.01E-03 | BMP7       | 1 |
| Cellular Growth and<br>Proliferation         | formation of cancer cells                           | 7.01E-03 | BMP7       | 1 |
| Cancer                                       | formation of cancer cells                           | 7.01E-03 | BMP7       | 1 |
| Cellular Function and<br>Maintenance         | function of fibroblast cell lines                   | 7.01E-03 | GATA2      | 1 |
| Organismal Injury and<br>Abnormalities       | leakage of blood                                    | 7.01E-03 | IL1R2      | 1 |
| Hematological Disease                        | leakage of blood                                    | 7.01E-03 | IL1R2      | 1 |
| Embryonic<br>Development                     | maturation of embryonic stem cell<br>lines          | 7.01E-03 | NR4A2      | 1 |
| Cellular Development                         | maturation of embryonic stem cell<br>lines          | 7.01E-03 | NR4A2      | 1 |

|                                                       |                                         |          |            |   |
|-------------------------------------------------------|-----------------------------------------|----------|------------|---|
| Embryonic Development                                 | morphogenesis of nephrogenic mesenchyme | 7.01E-03 | BMP7       | 1 |
| Organismal Development                                | morphogenesis of nephrogenic mesenchyme | 7.01E-03 | BMP7       | 1 |
| Tissue Development                                    | morphogenesis of nephrogenic mesenchyme | 7.01E-03 | BMP7       | 1 |
| Cancer                                                | regression of fibrosarcoma              | 7.01E-03 | HYOU1      | 1 |
| Tumor Morphology                                      | regression of fibrosarcoma              | 7.01E-03 | HYOU1      | 1 |
| Organ Development                                     | repair of kidney                        | 7.01E-03 | BMP7       | 1 |
| Organ Morphology                                      | repair of kidney                        | 7.01E-03 | BMP7       | 1 |
| Renal and Urological System Development and Function  | repair of kidney                        | 7.01E-03 | BMP7       | 1 |
| Neurological Disease                                  | sialidosis                              | 7.01E-03 | NEU1       | 1 |
| Developmental Disorder                                | sialidosis                              | 7.01E-03 | NEU1       | 1 |
| Hereditary Disorder                                   | sialidosis                              | 7.01E-03 | NEU1       | 1 |
| Metabolic Disease                                     | sialidosis                              | 7.01E-03 | NEU1       | 1 |
| Nervous System Development and Function               | survival of facial motor neurons        | 7.01E-03 | GDF15      | 1 |
| Cell Death and Survival                               | survival of facial motor neurons        | 7.01E-03 | GDF15      | 1 |
| Cell Death and Survival                               | survival of paneth cells                | 7.01E-03 | ERN1       | 1 |
| Small Molecule                                        |                                         |          |            |   |
| Biochemistry                                          | synthesis of glutamine                  | 7.01E-03 | CCDC92     | 1 |
| Amino Acid                                            |                                         |          |            |   |
| Metabolism                                            | synthesis of glutamine                  | 7.01E-03 | CCDC92     | 1 |
| Protein Synthesis                                     | translation of reporter protein         | 7.01E-03 | ERN1       | 1 |
| Small Molecule                                        |                                         |          |            |   |
| Biochemistry                                          | uptake of vitamin E                     | 7.01E-03 | SEC14L2    | 1 |
| Lipid Metabolism                                      | uptake of vitamin E                     | 7.01E-03 | SEC14L2    | 1 |
| Molecular Transport                                   | uptake of vitamin E                     | 7.01E-03 | SEC14L2    | 1 |
| Vitamin and Mineral                                   |                                         |          |            |   |
| Metabolism                                            | uptake of vitamin E                     | 7.01E-03 | SEC14L2    | 1 |
| Small Molecule                                        |                                         |          |            |   |
| Biochemistry                                          | synthesis of proteoglycan               | 7.06E-03 | BMP7,IL1R2 | 2 |
| Carbohydrate                                          |                                         |          |            |   |
| Metabolism                                            | synthesis of proteoglycan               | 7.06E-03 | BMP7,IL1R2 | 2 |
| Connective Tissue                                     |                                         |          |            |   |
| Development and Function                              | abnormal morphology of maxilla          | 7.44E-03 | BMP7,PKDCC | 2 |
| Embryonic                                             |                                         |          |            |   |
| Development                                           | abnormal morphology of maxilla          | 7.44E-03 | BMP7,PKDCC | 2 |
| Organ Development                                     | abnormal morphology of maxilla          | 7.44E-03 | BMP7,PKDCC | 2 |
| Organ Morphology                                      | abnormal morphology of maxilla          | 7.44E-03 | BMP7,PKDCC | 2 |
| Organismal                                            |                                         |          |            |   |
| Development                                           | abnormal morphology of maxilla          | 7.44E-03 | BMP7,PKDCC | 2 |
| Skeletal and Muscular System Development and Function | abnormal morphology of maxilla          | 7.44E-03 | BMP7,PKDCC | 2 |

|                                              |                                                           |          |                                |   |
|----------------------------------------------|-----------------------------------------------------------|----------|--------------------------------|---|
| Tissue Development                           | abnormal morphology of maxilla                            | 7.44E-03 | BMP7,PKDCC                     | 2 |
| Cancer                                       | chronic myeloproliferative disorder                       | 8.21E-03 | BMP7,GATA2,PDE4B               | 3 |
| Hematological Disease                        | chronic myeloproliferative disorder                       | 8.21E-03 | BMP7,GATA2,PDE4B               | 3 |
| Organ Development                            | function of genital organ                                 | 8.66E-03 | ACSL4,BMP7                     | 2 |
| Reproductive System Development and Function | function of genital organ                                 | 8.66E-03 | ACSL4,BMP7                     | 2 |
| Cancer                                       | ovarian cancer                                            | 9.05E-03 | AGR2,BMP7,EVL,GDF15,GPX3,KCNK6 | 6 |
| Endocrine System Disorders                   | ovarian cancer                                            | 9.05E-03 | AGR2,BMP7,EVL,GDF15,GPX3,KCNK6 | 6 |
| Reproductive System Disease                  | ovarian cancer                                            | 9.05E-03 | AGR2,BMP7,EVL,GDF15,GPX3,KCNK6 | 6 |
| Cellular Function and Maintenance            | endoplasmic reticulum stress response of cells            | 9.08E-03 | ATF4,ERN1                      | 2 |
| Cellular Compromise                          | endoplasmic reticulum stress response of cells            | 9.08E-03 | ATF4,ERN1                      | 2 |
| Developmental Disorder                       | hypoplasia of liver                                       | 9.08E-03 | ATF4,ERN1                      | 2 |
| Gastrointestinal Disease                     | hypoplasia of liver                                       | 9.08E-03 | ATF4,ERN1                      | 2 |
| Hepatic System Disease                       | hypoplasia of liver                                       | 9.08E-03 | ATF4,ERN1                      | 2 |
| Inflammatory Response                        | inflammatory response of cells                            | 9.08E-03 | ERN1,NR4A2                     | 2 |
| Developmental Disorder                       | syndactyly                                                | 1.04E-02 | ASPH,BMP7                      | 2 |
| Skeletal and Muscular Disorders              | syndactyly                                                | 1.04E-02 | ASPH,BMP7                      | 2 |
| Digestive System Development and Function    | abnormal morphology of hard palate                        | 1.05E-02 | BMP7                           | 1 |
| Organ Morphology                             | abnormal morphology of zymogen granules                   | 1.05E-02 | ATF4                           | 1 |
| Cell Morphology                              | abnormal morphology of zymogen granules                   | 1.05E-02 | ATF4                           | 1 |
| Endocrine System Development and Function    | abnormal morphology of zymogen granules                   | 1.05E-02 | ATF4                           | 1 |
| Digestive System Development and Function    | abnormal morphology of zymogen granules                   | 1.05E-02 | ATF4                           | 1 |
| Cell Death and Survival                      | anoikis of cervical cancer cell lines                     | 1.05E-02 | NR4A2                          | 1 |
| Cell Death and Survival                      | apoptosis of lens epithelium                              | 1.05E-02 | ATF4                           | 1 |
| Cell Cycle                                   | arrest in cell cycle progression of neuronal hybrid cells | 1.05E-02 | NR4A2                          | 1 |
| Cellular Development                         | arrest in growth of prostate cell lines                   | 1.05E-02 | BMP7                           | 1 |
| Cellular Growth and Proliferation            | arrest in growth of prostate cell lines                   | 1.05E-02 | BMP7                           | 1 |

|                                                             |                                                     |          |       |   |
|-------------------------------------------------------------|-----------------------------------------------------|----------|-------|---|
| Reproductive System<br>Development and<br>Function          | arrest in growth of prostate cell lines             | 1.05E-02 | BMP7  | 1 |
| Organ Development                                           | branching of lacrimal gland                         | 1.05E-02 | BMP7  | 1 |
| Organ Morphology                                            | branching of lacrimal gland                         | 1.05E-02 | BMP7  | 1 |
| Tissue Development                                          | branching of lacrimal gland                         | 1.05E-02 | BMP7  | 1 |
| Cellular Development                                        | branching of lacrimal gland                         | 1.05E-02 | BMP7  | 1 |
| Visual System<br>Development and<br>Function                | branching of lacrimal gland                         | 1.05E-02 | BMP7  | 1 |
| Small Molecule<br>Biochemistry                              | degradation of estrogen                             | 1.05E-02 | COMT  | 1 |
| Lipid Metabolism                                            | degradation of estrogen                             | 1.05E-02 | COMT  | 1 |
| Vitamin and Mineral<br>Metabolism                           | degradation of estrogen                             | 1.05E-02 | COMT  | 1 |
| Embryonic<br>Development                                    | development of Paneth cells                         | 1.05E-02 | ERN1  | 1 |
| Organ Development                                           | development of Paneth cells                         | 1.05E-02 | ERN1  | 1 |
| Organismal<br>Development                                   | development of Paneth cells                         | 1.05E-02 | ERN1  | 1 |
| Tissue Development                                          | development of Paneth cells                         | 1.05E-02 | ERN1  | 1 |
| Cellular Development                                        | development of Paneth cells                         | 1.05E-02 | ERN1  | 1 |
| Digestive System<br>Development and<br>Function             | development of Paneth cells                         | 1.05E-02 | ERN1  | 1 |
| Embryonic<br>Development                                    | differentiation of ectodermal cells                 | 1.05E-02 | WWTR1 | 1 |
| Cellular Development                                        | differentiation of ectodermal cells                 | 1.05E-02 | WWTR1 | 1 |
| Cellular Development                                        | differentiation of neuronal hybrid cells            | 1.05E-02 | NR4A2 | 1 |
| Cellular Function and<br>Maintenance                        | endocytosis by macrophages                          | 1.05E-02 | HYOU1 | 1 |
| Hematological System<br>Development and<br>Function         | endocytosis by macrophages                          | 1.05E-02 | HYOU1 | 1 |
| Cellular Development                                        | epithelial-mesenchymal transition of<br>hepatocytes | 1.05E-02 | BMP7  | 1 |
| Skeletal and Muscular<br>System Development<br>and Function | formation of joint                                  | 1.05E-02 | BMP7  | 1 |
| Cellular Growth and<br>Proliferation                        | formation of myeloid progenitor cells               | 1.05E-02 | GATA2 | 1 |
| Hematological System<br>Development and<br>Function         | formation of myeloid progenitor cells               | 1.05E-02 | GATA2 | 1 |

|                                                   |                                               |          |       |   |
|---------------------------------------------------|-----------------------------------------------|----------|-------|---|
| Lymphoid Tissue<br>Structure and<br>Development   | formation of myeloid progenitor cells         | 1.05E-02 | GATA2 | 1 |
| Hematopoiesis                                     | formation of myeloid progenitor cells         | 1.05E-02 | GATA2 | 1 |
| Small Molecule<br>Biochemistry                    | hydroxylation of L-proline                    | 1.05E-02 | P4HA2 | 1 |
| Amino Acid<br>Metabolism                          | hydroxylation of L-proline                    | 1.05E-02 | P4HA2 | 1 |
| Post-Translational<br>Modification                | hydroxylation of L-proline                    | 1.05E-02 | P4HA2 | 1 |
| Developmental<br>Disorder                         | hypoplasia of exocrine region of<br>pancreas  | 1.05E-02 | ATF4  | 1 |
| Nervous System<br>Development and<br>Function     | maturation of dopaminergic neurons            | 1.05E-02 | NR4A2 | 1 |
| Cellular Development                              | maturation of dopaminergic neurons            | 1.05E-02 | NR4A2 | 1 |
| Embryonic<br>Development                          | mineralization of mesenchymal cells           | 1.05E-02 | BMP7  | 1 |
| Cell Morphology                                   | mineralization of mesenchymal cells           | 1.05E-02 | BMP7  | 1 |
| Neurological Disease                              | misrouting of axons                           | 1.05E-02 | BMP7  | 1 |
| Embryonic<br>Development                          | modification of embryonic cell lines          | 1.05E-02 | NR4A2 | 1 |
| Cell Morphology                                   | modification of embryonic cell lines          | 1.05E-02 | NR4A2 | 1 |
| Embryonic<br>Development                          | morphogenesis of metanephric<br>mesenchyme    | 1.05E-02 | BMP7  | 1 |
| Organismal<br>Development                         | morphogenesis of metanephric<br>mesenchyme    | 1.05E-02 | BMP7  | 1 |
| Tissue Development                                | morphogenesis of metanephric<br>mesenchyme    | 1.05E-02 | BMP7  | 1 |
| Cell Morphology                                   | morphology of skin cell lines                 | 1.05E-02 | BMP7  | 1 |
| Cell Death and Survival                           | necrosis of skin                              | 1.05E-02 | TRAF1 | 1 |
| Dermatological<br>Diseases and<br>Conditions      | necrosis of skin                              | 1.05E-02 | TRAF1 | 1 |
| Embryonic<br>Development                          | neurogenesis of olfactory epithelial<br>cells | 1.05E-02 | BMP7  | 1 |
| Organ Development                                 | neurogenesis of olfactory epithelial<br>cells | 1.05E-02 | BMP7  | 1 |
| Organismal<br>Development                         | neurogenesis of olfactory epithelial<br>cells | 1.05E-02 | BMP7  | 1 |
| Tissue Development                                | neurogenesis of olfactory epithelial<br>cells | 1.05E-02 | BMP7  | 1 |
| Nervous System<br>Development and<br>Function     | neurogenesis of olfactory epithelial<br>cells | 1.05E-02 | BMP7  | 1 |
| Cellular Development                              | neurogenesis of olfactory epithelial<br>cells | 1.05E-02 | BMP7  | 1 |
| Respiratory System<br>Development and<br>Function | neurogenesis of olfactory epithelial<br>cells | 1.05E-02 | BMP7  | 1 |

|                                                       |                                                 |          |                                                         |    |
|-------------------------------------------------------|-------------------------------------------------|----------|---------------------------------------------------------|----|
| Cell-To-Cell Signaling and Interaction                | proinflammatory response of smooth muscle cells | 1.05E-02 | NR4A2                                                   | 1  |
| Inflammatory Response                                 | proinflammatory response of smooth muscle cells | 1.05E-02 | NR4A2                                                   | 1  |
| Organ Development                                     | proliferation of alveolar epithelium            | 1.05E-02 | ATF4                                                    | 1  |
| Tissue Development                                    | proliferation of alveolar epithelium            | 1.05E-02 | ATF4                                                    | 1  |
| Respiratory System Development and Function           | proliferation of alveolar epithelium            | 1.05E-02 | ATF4                                                    | 1  |
| Cellular Function and Maintenance                     | release of intracellular stores                 | 1.05E-02 | ITPR2                                                   | 1  |
| Cellular Assembly and Organization                    | release of intracellular stores                 | 1.05E-02 | ITPR2                                                   | 1  |
| Cancer                                                | size of intestinal polyp                        | 1.05E-02 | ASPH                                                    | 1  |
| Gastrointestinal Disease                              | size of intestinal polyp                        | 1.05E-02 | ASPH                                                    | 1  |
| Organismal Injury and Abnormalities                   | size of intestinal polyp                        | 1.05E-02 | ASPH                                                    | 1  |
| Developmental Disorder                                | syndactyly of limb                              | 1.05E-02 | BMP7                                                    | 1  |
| Skeletal and Muscular Disorders                       | syndactyly of limb                              | 1.05E-02 | BMP7                                                    | 1  |
| Cellular Movement                                     | invasion of tumor cell lines                    | 1.12E-02 | ACSL4,AGR2,BMP7,GDF15,UNC5B,WWTR1                       | 6  |
| Cellular Development                                  | differentiation of megakaryocytes               | 1.13E-02 | GATA2,TESC                                              | 2  |
| Hematological System Development and Function         | differentiation of megakaryocytes               | 1.13E-02 | GATA2,TESC                                              | 2  |
| Hematopoiesis                                         | differentiation of megakaryocytes               | 1.13E-02 | GATA2,TESC                                              | 2  |
| Protein Synthesis                                     | homotetramerization of protein                  | 1.18E-02 | FBP1,GPX3                                               | 2  |
| Post-Translational Modification                       | homotetramerization of protein                  | 1.18E-02 | FBP1,GPX3                                               | 2  |
| Connective Tissue Development and Function            | mineralization of bone                          | 1.18E-02 | ATF4,BMP7,PKDCC                                         | 3  |
| Embryonic Development                                 | mineralization of bone                          | 1.18E-02 | ATF4,BMP7,PKDCC                                         | 3  |
| Organ Development                                     | mineralization of bone                          | 1.18E-02 | ATF4,BMP7,PKDCC                                         | 3  |
| Organismal Development                                | mineralization of bone                          | 1.18E-02 | ATF4,BMP7,PKDCC                                         | 3  |
| Skeletal and Muscular System Development and Function | mineralization of bone                          | 1.18E-02 | ATF4,BMP7,PKDCC                                         | 3  |
| Tissue Development                                    | mineralization of bone                          | 1.18E-02 | ATF4,BMP7,PKDCC                                         | 3  |
| Cell Death and Survival                               | apoptosis of tumor cell lines                   | 1.26E-02 | ATF4,BMP7,ERN1,GDF15,GLRX,ITPR2,NR4A2,PDE4B,TRAF1,UNC5B | 10 |
| Cellular Development                                  | differentiation of connective tissue cells      | 1.31E-02 | ALMS1,ATF4,BMP7,GATA2,PKDCC,WWTR1                       | 6  |
| Organ Morphology                                      | abnormal morphology of pancreatic acinus        | 1.40E-02 | ATF4                                                    | 1  |

|                                                             |                                                     |          |                           |   |
|-------------------------------------------------------------|-----------------------------------------------------|----------|---------------------------|---|
| Endocrine System<br>Development and<br>Function             | abnormal morphology of pancreatic<br>acinus         | 1.40E-02 | ATF4                      | 1 |
| Digestive System<br>Development and<br>Function             | abnormal morphology of pancreatic<br>acinus         | 1.40E-02 | ATF4                      | 1 |
| Carbohydrate<br>Metabolism                                  | accumulation of proteoglycan                        | 1.40E-02 | BMP7                      | 1 |
| Tissue Development                                          | aggregation of neuroblastoma cell lines             | 1.40E-02 | BMP7                      | 1 |
| Cell Death and Survival                                     | apoptosis of PSMC cells                             | 1.40E-02 | BMP7                      | 1 |
| Organ Morphology                                            | contraction of ventricular myocytes                 | 1.40E-02 | ASPH                      | 1 |
| Skeletal and Muscular<br>System Development<br>and Function | contraction of ventricular myocytes                 | 1.40E-02 | ASPH                      | 1 |
| Cell Morphology                                             | contraction of ventricular myocytes                 | 1.40E-02 | ASPH                      | 1 |
| Cardiovascular System<br>Development and<br>Function        | contraction of ventricular myocytes                 | 1.40E-02 | ASPH                      | 1 |
| Tissue Morphology                                           | degeneration of epididymal epithelium               | 1.40E-02 | BMP7                      | 1 |
| Organ Morphology                                            | dilation of collecting tubule                       | 1.40E-02 | SEC63 (includes EG:11231) | 1 |
| Renal and Urological<br>System Development<br>and Function  | dilation of collecting tubule                       | 1.40E-02 | SEC63 (includes EG:11231) | 1 |
| Connective Tissue<br>Development and<br>Function            | double-stranded DNA break repair of<br>fibroblasts  | 1.40E-02 | NR4A2                     | 1 |
| Cell Morphology                                             | double-stranded DNA break repair of<br>fibroblasts  | 1.40E-02 | NR4A2                     | 1 |
| Cellular Function and<br>Maintenance                        | double-stranded DNA break repair of<br>fibroblasts  | 1.40E-02 | NR4A2                     | 1 |
| DNA Replication,<br>Recombination, and<br>Repair            | double-stranded DNA break repair of<br>fibroblasts  | 1.40E-02 | NR4A2                     | 1 |
| Cell Cycle                                                  | entry into S phase of prostate cancer<br>cell lines | 1.40E-02 | BMP7                      | 1 |
| Cellular Growth and<br>Proliferation                        | formation of breast cancer cell lines               | 1.40E-02 | BMP7                      | 1 |
| Inflammatory<br>Response                                    | inflammation of ileum                               | 1.40E-02 | AGR2                      | 1 |
| Organismal<br>Development                                   | lack of maxillary incisor                           | 1.40E-02 | BMP7                      | 1 |
| Digestive System<br>Development and<br>Function             | lack of maxillary incisor                           | 1.40E-02 | BMP7                      | 1 |
| Nervous System<br>Development and<br>Function               | loss of trigeminal motor neurons                    | 1.40E-02 | GDF15                     | 1 |
| Cell Death and Survival                                     | loss of trigeminal motor neurons                    | 1.40E-02 | GDF15                     | 1 |



|                                                    |                                           |          |                                                      |    |
|----------------------------------------------------|-------------------------------------------|----------|------------------------------------------------------|----|
| Small Molecule<br>Biochemistry<br>Carbohydrate     | metabolism of GDP-D-mannose               | 1.40E-02 | GUK1                                                 | 1  |
| Metabolism<br>Nucleic Acid                         | metabolism of GDP-D-mannose               | 1.40E-02 | GUK1                                                 | 1  |
| Metabolism                                         | metabolism of GDP-D-mannose               | 1.40E-02 | GUK1                                                 | 1  |
| Connective Tissue<br>Development and<br>Function   | metabolism of connective tissue           | 1.40E-02 | BMP7                                                 | 1  |
| Tissue Development                                 | metabolism of connective tissue           | 1.40E-02 | BMP7                                                 | 1  |
| Cell Morphology                                    | mineralization of stromal cell lines      | 1.40E-02 | BMP7                                                 | 1  |
| Developmental<br>Disorder                          | polydactyly of limb                       | 1.40E-02 | BMP7                                                 | 1  |
| Skeletal and Muscular<br>Disorders                 | polydactyly of limb                       | 1.40E-02 | BMP7                                                 | 1  |
| Organ Morphology                                   | quantity of primary ovarian follicle      | 1.40E-02 | BMP7                                                 | 1  |
| Reproductive System<br>Development and<br>Function | quantity of primary ovarian follicle      | 1.40E-02 | BMP7                                                 | 1  |
| Cell-To-Cell Signaling<br>and Interaction          | regulation of neurotransmitter            | 1.40E-02 | COMT                                                 | 1  |
| Small Molecule<br>Biochemistry                     | regulation of neurotransmitter            | 1.40E-02 | COMT                                                 | 1  |
| Cell-To-Cell Signaling<br>and Interaction          | removal of dopamine                       | 1.40E-02 | COMT                                                 | 1  |
| Small Molecule<br>Biochemistry                     | removal of dopamine                       | 1.40E-02 | COMT                                                 | 1  |
| Drug Metabolism                                    | removal of dopamine                       | 1.40E-02 | COMT                                                 | 1  |
| Small Molecule<br>Biochemistry                     | secretion of androstenedione              | 1.40E-02 | BMP7                                                 | 1  |
| Endocrine System<br>Development and<br>Function    | secretion of androstenedione              | 1.40E-02 | BMP7                                                 | 1  |
| Lipid Metabolism                                   | secretion of androstenedione              | 1.40E-02 | BMP7                                                 | 1  |
| Molecular Transport                                | secretion of androstenedione              | 1.40E-02 | BMP7                                                 | 1  |
| Small Molecule<br>Biochemistry                     | synthesis of homocysteine                 | 1.40E-02 | COMT                                                 | 1  |
| Amino Acid<br>Metabolism                           | synthesis of homocysteine                 | 1.40E-02 | COMT                                                 | 1  |
| Organismal Injury and<br>Abnormalities             | trauma hemorrhage                         | 1.40E-02 | ERN1<br>AGR2,ATF4,BMP7,ERN1,GDF15,GLRX,ITPR2,NR4A2,P | 1  |
| Cell Death and Survival                            | cell death of tumor cell lines            | 1.50E-02 | DE4B,TRAF1,UNC5B                                     | 11 |
| Cardiovascular Disease<br>Organismal               | vascular disease                          | 1.60E-02 | COMT,ERN1,GDF15,GPX3,HYOU1,PDE4B,TINAGL1             | 7  |
| Development                                        | morphology of face                        | 1.65E-02 | ASPH,BMP7,PKDCC                                      | 3  |
| Cell Morphology                                    | formation of cilia                        | 1.71E-02 | ALMS1,WWTR1                                          | 2  |
| Cellular Function and<br>Maintenance               | formation of cilia                        | 1.71E-02 | ALMS1,WWTR1                                          | 2  |
| Cellular Assembly and<br>Organization              | formation of cilia                        | 1.71E-02 | ALMS1,WWTR1                                          | 2  |
| Tissue Morphology                                  | abnormal morphology of maxillary<br>shelf | 1.74E-02 | BMP7                                                 | 1  |

|                                                       |                                                               |          |       |   |
|-------------------------------------------------------|---------------------------------------------------------------|----------|-------|---|
| Cell Cycle                                            | cell division of stem cells                                   | 1.74E-02 | WWTR1 | 1 |
| Embryonic Development                                 | cell viability of embryonic stem cell lines                   | 1.74E-02 | NR4A2 | 1 |
| Cell Death and Survival                               | cell viability of embryonic stem cell lines                   | 1.74E-02 | NR4A2 | 1 |
| Cell-To-Cell Signaling and Interaction                | contact growth inhibition of myeloma cell lines               | 1.74E-02 | BMP7  | 1 |
| Cellular Growth and Proliferation                     | contact growth inhibition of myeloma cell lines               | 1.74E-02 | BMP7  | 1 |
| Cell Cycle                                            | contact growth inhibition of myeloma cell lines               | 1.74E-02 | BMP7  | 1 |
| Skeletal and Muscular System Development and Function | depolarization of muscle cells                                | 1.74E-02 | ASPH  | 1 |
| Cell Morphology                                       | depolarization of muscle cells                                | 1.74E-02 | ASPH  | 1 |
| Cellular Function and Maintenance                     | depolarization of muscle cells                                | 1.74E-02 | ASPH  | 1 |
| Connective Tissue Development and Function            | development of appendicular skeleton                          | 1.74E-02 | BMP7  | 1 |
| Embryonic Development                                 | development of appendicular skeleton                          | 1.74E-02 | BMP7  | 1 |
| Organ Development                                     | development of appendicular skeleton                          | 1.74E-02 | BMP7  | 1 |
| Organismal Development                                | development of appendicular skeleton                          | 1.74E-02 | BMP7  | 1 |
| Skeletal and Muscular System Development and Function | development of appendicular skeleton                          | 1.74E-02 | BMP7  | 1 |
| Tissue Development                                    | development of appendicular skeleton                          | 1.74E-02 | BMP7  | 1 |
| Nervous System Development and Function               | differentiation of radial glial cells                         | 1.74E-02 | BMP7  | 1 |
| Cellular Development                                  | differentiation of radial glial cells                         | 1.74E-02 | BMP7  | 1 |
| Cell-To-Cell Signaling and Interaction                | excretion of norepinephrine                                   | 1.74E-02 | COMT  | 1 |
| Small Molecule Biochemistry                           | excretion of norepinephrine                                   | 1.74E-02 | COMT  | 1 |
| Drug Metabolism                                       | excretion of norepinephrine                                   | 1.74E-02 | COMT  | 1 |
| Molecular Transport                                   | excretion of norepinephrine                                   | 1.74E-02 | COMT  | 1 |
| Nervous System Development and Function               | exit from cell cycle progression of neuronal progenitor cells | 1.74E-02 | GATA2 | 1 |
| Cell Cycle                                            | exit from cell cycle progression of neuronal progenitor cells | 1.74E-02 | GATA2 | 1 |
| Connective Tissue Development and Function            | formation of fibroblasts                                      | 1.74E-02 | BMP7  | 1 |
| Cellular Growth and Proliferation                     | formation of fibroblasts                                      | 1.74E-02 | BMP7  | 1 |
| Developmental Disorder                                | polysyndactyly                                                | 1.74E-02 | BMP7  | 1 |

|                                   |                                          |          |                                                                              |    |
|-----------------------------------|------------------------------------------|----------|------------------------------------------------------------------------------|----|
| Skeletal and Muscular             |                                          |          |                                                                              |    |
| Disorders                         | polysyndactyly                           | 1.74E-02 | BMP7                                                                         | 1  |
| Tissue Morphology                 | quantity of podocytes                    | 1.74E-02 | BMP7                                                                         | 1  |
| Organ Morphology                  | quantity of preantral follicle           | 1.74E-02 | BMP7                                                                         | 1  |
| Reproductive System               |                                          |          |                                                                              |    |
| Development and Function          |                                          |          |                                                                              |    |
|                                   | quantity of preantral follicle           | 1.74E-02 | BMP7                                                                         | 1  |
| Infectious Disease                | replication of Dengue virus 2            | 1.74E-02 | ERN1                                                                         | 1  |
| Organismal Survival               | thermosensitivity                        | 1.74E-02 | GPX3                                                                         | 1  |
| Cardiovascular System             |                                          |          |                                                                              |    |
| Development and Function          |                                          |          |                                                                              |    |
|                                   | vascularization of wound                 | 1.74E-02 | HYOU1                                                                        | 1  |
| Organ Morphology                  | abnormal morphology of renal glomerulus  | 1.76E-02 | BMP7,COMT                                                                    | 2  |
| Renal and Urological System       |                                          |          |                                                                              |    |
| Development and Function          |                                          |          |                                                                              |    |
|                                   | abnormal morphology of renal glomerulus  | 1.76E-02 | BMP7,COMT                                                                    | 2  |
| Nervous System                    |                                          |          |                                                                              |    |
| Development and Function          |                                          |          |                                                                              |    |
|                                   | guidance of axons                        | 1.77E-02 | BMP7,SPON2,UNC5B                                                             | 3  |
| Cellular Movement                 | guidance of axons                        | 1.77E-02 | BMP7,SPON2,UNC5B                                                             | 3  |
| Cancer                            | prostatic carcinoma                      | 1.83E-02 | ASPH,GDF15,GPX3,MSMB                                                         | 4  |
| Reproductive System               |                                          |          |                                                                              |    |
| Disease                           | prostatic carcinoma                      | 1.83E-02 | ASPH,GDF15,GPX3,MSMB                                                         | 4  |
| Molecular Transport               | localization of protein                  | 1.83E-02 | AKAP2/PALM2-AKAP2,DOC2B,HYOU1                                                | 3  |
| Protein Synthesis                 | localization of protein                  | 1.83E-02 | AKAP2/PALM2-AKAP2,DOC2B,HYOU1                                                | 3  |
| Protein Trafficking               | localization of protein                  | 1.83E-02 | AKAP2/PALM2-AKAP2,DOC2B,HYOU1                                                | 3  |
| Cell Death and Survival           | apoptosis of myeloma cell lines          | 1.88E-02 | ATF4,BMP7                                                                    | 2  |
| Cell Death and Survival           | apoptosis of lymphoma cell lines         | 1.92E-02 | ERN1,ITPR2,PDE4B                                                             | 3  |
| Cellular Movement                 | cell movement                            | 1.93E-02 | ACSL4,AGR2,BMP7,EVL,GATA2,GDF15,GLRX,NEU1,NR4A2,PDE4B,SPON2,UNC5B,WARS,WWTR1 | 14 |
| Cell Morphology                   | repair of cells                          | 1.94E-02 | BMP7,NR4A2                                                                   | 2  |
| Cellular Function and Maintenance |                                          |          |                                                                              |    |
|                                   | repair of cells                          | 1.94E-02 | BMP7,NR4A2                                                                   | 2  |
| Metabolic Disease                 | albuminuria                              | 2.00E-02 | BMP7,COMT                                                                    | 2  |
| Renal and Urological Disease      |                                          |          |                                                                              |    |
|                                   | albuminuria                              | 2.00E-02 | BMP7,COMT                                                                    | 2  |
| Cellular Movement                 | invasion of prostate cancer cell lines   | 2.00E-02 | AGR2,BMP7                                                                    | 2  |
| Small Molecule                    |                                          |          |                                                                              |    |
| Biochemistry                      |                                          |          |                                                                              |    |
|                                   | metabolism of amino acids                | 2.02E-02 | ATF4,CCDC92,COMT                                                             | 3  |
| Amino Acid Metabolism             | metabolism of amino acids                | 2.02E-02 | ATF4,CCDC92,COMT                                                             | 3  |
| Developmental Disorder            |                                          |          |                                                                              |    |
|                                   | congenital anomaly of digestive system   | 2.05E-02 | ASPH,BMP7,SEC63 (includes EG:11231)                                          | 3  |
| Gastrointestinal Disease          |                                          |          |                                                                              |    |
|                                   | congenital anomaly of digestive system   | 2.05E-02 | ASPH,BMP7,SEC63 (includes EG:11231)                                          | 3  |
| Cell Morphology                   | abnormal morphology of pro-B lymphocytes | 2.09E-02 | ERN1                                                                         | 1  |
| Hematopoiesis                     | abnormal morphology of pro-B lymphocytes | 2.09E-02 | ERN1                                                                         | 1  |

|                                               |                                                  |          |       |   |
|-----------------------------------------------|--------------------------------------------------|----------|-------|---|
| Humoral Immune Response                       | abnormal morphology of pro-B lymphocytes         | 2.09E-02 | ERN1  | 1 |
| Cell-To-Cell Signaling and Interaction        | activation of bone marrow-derived macrophages    | 2.09E-02 | SPON2 | 1 |
| Hematological System Development and Function | activation of bone marrow-derived macrophages    | 2.09E-02 | SPON2 | 1 |
| Inflammatory Response                         | activation of bone marrow-derived macrophages    | 2.09E-02 | SPON2 | 1 |
| Immune Cell Trafficking                       | activation of bone marrow-derived macrophages    | 2.09E-02 | SPON2 | 1 |
| Ophthalmic Disease                            | atrophy of retinal pigment epithelium            | 2.09E-02 | BMP7  | 1 |
| Organismal Injury and Abnormalities           | atrophy of retinal pigment epithelium            | 2.09E-02 | BMP7  | 1 |
| Cell-To-Cell Signaling and Interaction        | catabolism of dopamine                           | 2.09E-02 | COMT  | 1 |
| Small Molecule Biochemistry                   | catabolism of dopamine                           | 2.09E-02 | COMT  | 1 |
| Drug Metabolism                               | catabolism of dopamine                           | 2.09E-02 | COMT  | 1 |
| Cell Cycle                                    | cell cycle progression of bone marrow cell lines | 2.09E-02 | GATA2 | 1 |
| Embryonic Development                         | development of myeloid progenitor cells          | 2.09E-02 | GATA2 | 1 |
| Organ Development                             | development of myeloid progenitor cells          | 2.09E-02 | GATA2 | 1 |
| Organismal Development                        | development of myeloid progenitor cells          | 2.09E-02 | GATA2 | 1 |
| Tissue Development                            | development of myeloid progenitor cells          | 2.09E-02 | GATA2 | 1 |
| Cellular Development                          | development of myeloid progenitor cells          | 2.09E-02 | GATA2 | 1 |
| Hematological System Development and Function | development of myeloid progenitor cells          | 2.09E-02 | GATA2 | 1 |
| Lymphoid Tissue Structure and Development     | development of myeloid progenitor cells          | 2.09E-02 | GATA2 | 1 |
| Hematopoiesis                                 | development of myeloid progenitor cells          | 2.09E-02 | GATA2 | 1 |
| Nervous System Development and Function       | differentiation of amacrine cells                | 2.09E-02 | NR4A2 | 1 |
| Cellular Development                          | differentiation of amacrine cells                | 2.09E-02 | NR4A2 | 1 |
| Visual System Development and Function        | differentiation of amacrine cells                | 2.09E-02 | NR4A2 | 1 |
| Cell Morphology                               | extension of pseudopodia                         | 2.09E-02 | EVL   | 1 |
| Cellular Function and Maintenance             | extension of pseudopodia                         | 2.09E-02 | EVL   | 1 |
| Cellular Assembly and Organization            | extension of pseudopodia                         | 2.09E-02 | EVL   | 1 |
| Cell Cycle                                    | homologous pairing of DNA                        | 2.09E-02 | EVL   | 1 |

|                                                             |                                         |          |                  |   |
|-------------------------------------------------------------|-----------------------------------------|----------|------------------|---|
| DNA Replication,<br>Recombination, and<br>Repair            | homologous pairing of DNA               | 2.09E-02 | EVL              | 1 |
| Developmental<br>Disorder                                   | hypoplasia of palatal shelf             | 2.09E-02 | BMP7             | 1 |
| Cellular Movement                                           | invasion of gastric cancer cells        | 2.09E-02 | GDF15            | 1 |
| Cancer                                                      | invasion of gastric cancer cells        | 2.09E-02 | GDF15            | 1 |
| Tumor Morphology                                            | invasion of gastric cancer cells        | 2.09E-02 | GDF15            | 1 |
| Skeletal and Muscular<br>System Development<br>and Function | mitosis of PASMC cells                  | 2.09E-02 | BMP7             | 1 |
| Cell Cycle                                                  | mitosis of PASMC cells                  | 2.09E-02 | BMP7             | 1 |
| Organ Morphology                                            | quantity of primordial ovarian follicle | 2.09E-02 | BMP7             | 1 |
| Reproductive System<br>Development and<br>Function          | quantity of primordial ovarian follicle | 2.09E-02 | BMP7             | 1 |
| Organismal Functions<br>Small Molecule                      | stress response of mice                 | 2.09E-02 | COMT             | 1 |
| Biochemistry                                                | transport of oleic acid                 | 2.09E-02 | ACSL4            | 1 |
| Lipid Metabolism                                            | transport of oleic acid                 | 2.09E-02 | ACSL4            | 1 |
| Molecular Transport                                         | transport of oleic acid                 | 2.09E-02 | ACSL4            | 1 |
| Connective Tissue<br>Development and<br>Function            | abnormal morphology of sternum          | 2.12E-02 | BMP7,PKDCC       | 2 |
| Embryonic<br>Development                                    | abnormal morphology of sternum          | 2.12E-02 | BMP7,PKDCC       | 2 |
| Organ Development                                           | abnormal morphology of sternum          | 2.12E-02 | BMP7,PKDCC       | 2 |
| Organ Morphology                                            | abnormal morphology of sternum          | 2.12E-02 | BMP7,PKDCC       | 2 |
| Organismal<br>Development                                   | abnormal morphology of sternum          | 2.12E-02 | BMP7,PKDCC       | 2 |
| Skeletal and Muscular<br>System Development<br>and Function | abnormal morphology of sternum          | 2.12E-02 | BMP7,PKDCC       | 2 |
| Tissue Development                                          | abnormal morphology of sternum          | 2.12E-02 | BMP7,PKDCC       | 2 |
| Embryonic<br>Development                                    | development of retina                   | 2.18E-02 | ALMS1,WARS       | 2 |
| Organ Development                                           | development of retina                   | 2.18E-02 | ALMS1,WARS       | 2 |
| Organismal<br>Development                                   | development of retina                   | 2.18E-02 | ALMS1,WARS       | 2 |
| Tissue Development                                          | development of retina                   | 2.18E-02 | ALMS1,WARS       | 2 |
| Visual System<br>Development and<br>Function                | development of retina                   | 2.18E-02 | ALMS1,WARS       | 2 |
| Embryonic<br>Development                                    | differentiation of embryonic cells      | 2.25E-02 | BMP7,NR4A2,WWTR1 | 3 |
| Cellular Development                                        | differentiation of embryonic cells      | 2.25E-02 | BMP7,NR4A2,WWTR1 | 3 |
| Small Molecule<br>Biochemistry                              | concentration of prostaglandin          | 2.25E-02 | ACSL4,IL1R2      | 2 |

|                                              |                                         |          |                                                        |    |
|----------------------------------------------|-----------------------------------------|----------|--------------------------------------------------------|----|
| Lipid Metabolism                             | concentration of prostaglandin          | 2.25E-02 | ACSL4,IL1R2                                            | 2  |
| Molecular Transport                          | concentration of prostaglandin          | 2.25E-02 | ACSL4,IL1R2                                            | 2  |
| Organismal Injury and Abnormalities          | injury of kidney                        | 2.25E-02 | BMP7,UNC5B                                             | 2  |
| Renal and Urological Disease                 | injury of kidney                        | 2.25E-02 | BMP7,UNC5B                                             | 2  |
| Cellular Development                         | differentiation of bone marrow cells    | 2.28E-02 | BMP7,GATA2,TESC                                        | 3  |
| Hematopoiesis                                | differentiation of bone marrow cells    | 2.28E-02 | BMP7,GATA2,TESC                                        | 3  |
| Developmental Disorder                       | inborn error of carbohydrate metabolism | 2.31E-02 | FBP1,NEU1                                              | 2  |
| Hereditary Disorder                          | inborn error of carbohydrate metabolism | 2.31E-02 | FBP1,NEU1                                              | 2  |
| Metabolic Disease                            | inborn error of carbohydrate metabolism | 2.31E-02 | FBP1,NEU1                                              | 2  |
| Reproductive System Development and Function | ovulation                               | 2.31E-02 | ALMS1,BMP7                                             | 2  |
| Small Molecule Biochemistry                  | synthesis of amino acids                | 2.31E-02 | CCDC92,COMT                                            | 2  |
| Amino Acid Metabolism                        | synthesis of amino acids                | 2.31E-02 | CCDC92,COMT                                            | 2  |
| Organ Morphology                             | abnormal morphology of hair             | 2.38E-02 | ATF4,BMP7                                              | 2  |
| Hair and Skin Development and Function       | abnormal morphology of hair             | 2.38E-02 | ATF4,BMP7                                              | 2  |
| Cancer                                       | ovarian adenocarcinoma                  | 2.42E-02 | EVL,GPX3,KCNK6                                         | 3  |
| Endocrine System Disorders                   | ovarian adenocarcinoma                  | 2.42E-02 | EVL,GPX3,KCNK6                                         | 3  |
| Reproductive System Disease                  | ovarian adenocarcinoma                  | 2.42E-02 | EVL,GPX3,KCNK6                                         | 3  |
| Cell Death and Survival                      | cell survival                           | 2.43E-02 | ATF4,BMP7,ERN1,GATA2,GDF15,GLRX,GMFG,HYOU1,NR4A2,UNC5B | 10 |
| Cell Morphology                              | abnormal morphology of Paneth cells     | 2.43E-02 | AGR2                                                   | 1  |
| Digestive System Development and Function    | abnormal morphology of Paneth cells     | 2.43E-02 | AGR2                                                   | 1  |
| Embryonic Development                        | abnormal morphology of ciliary body     | 2.43E-02 | ATF4                                                   | 1  |
| Organ Development                            | abnormal morphology of ciliary body     | 2.43E-02 | ATF4                                                   | 1  |
| Organ Morphology                             | abnormal morphology of ciliary body     | 2.43E-02 | ATF4                                                   | 1  |
| Organismal Development                       | abnormal morphology of ciliary body     | 2.43E-02 | ATF4                                                   | 1  |
| Tissue Development                           | abnormal morphology of ciliary body     | 2.43E-02 | ATF4                                                   | 1  |
| Visual System Development and Function       | abnormal morphology of ciliary body     | 2.43E-02 | ATF4                                                   | 1  |
| Cell Morphology                              | abnormal morphology of plasma membrane  | 2.43E-02 | GLRX                                                   | 1  |
| Digestive System Development and Function    | abnormal morphology of soft palate      | 2.43E-02 | BMP7                                                   | 1  |

|                                                                   |                                                |          |                           |   |
|-------------------------------------------------------------------|------------------------------------------------|----------|---------------------------|---|
| Tissue Development                                                | adhesion of neuroblastoma cell lines           | 2.43E-02 | BMP7                      | 1 |
| Cell-To-Cell Signaling and Interaction                            | adhesion of neuroblastoma cell lines           | 2.43E-02 | BMP7                      | 1 |
| Cellular Development                                              | arrest in growth of prostate cancer cell lines | 2.43E-02 | GDF15                     | 1 |
| Cellular Growth and Proliferation                                 | arrest in growth of prostate cancer cell lines | 2.43E-02 | GDF15                     | 1 |
| Cardiovascular System Development and Function                    | conduction of atrioventricular node            | 2.43E-02 | ASPH                      | 1 |
| Tissue Development Nervous System Development and Function        | development of dopaminergic neurons            | 2.43E-02 | NR4A2                     | 1 |
|                                                                   | development of dopaminergic neurons            | 2.43E-02 | NR4A2                     | 1 |
| Cellular Development Embryonic Development Organismal Development | development of dopaminergic neurons            | 2.43E-02 | NR4A2                     | 1 |
|                                                                   | development of lenticular vesicle              | 2.43E-02 | BMP7                      | 1 |
|                                                                   | development of lenticular vesicle              | 2.43E-02 | BMP7                      | 1 |
| Tissue Development Organ Morphology                               | development of lenticular vesicle              | 2.43E-02 | BMP7                      | 1 |
|                                                                   | dilation of kidney                             | 2.43E-02 | SEC63 (includes EG:11231) | 1 |
| Renal and Urological System Development and Function              | dilation of kidney                             | 2.43E-02 | SEC63 (includes EG:11231) | 1 |
| Hereditary Disorder                                               | dystroglycanopathy                             | 2.43E-02 | GYLTL1B                   | 1 |
| Skeletal and Muscular Disorders                                   | dystroglycanopathy                             | 2.43E-02 | GYLTL1B                   | 1 |
| Tissue Development Small Molecule Biochemistry                    | function of extraembryonic tissue              | 2.43E-02 | ERN1                      | 1 |
|                                                                   | loading of GTP                                 | 2.43E-02 | BMP7                      | 1 |
| Cell Signaling Nucleic Acid Metabolism                            | loading of GTP                                 | 2.43E-02 | BMP7                      | 1 |
| Nervous System Development and Function                           | loading of GTP                                 | 2.43E-02 | BMP7                      | 1 |
|                                                                   | loss of facial motor neurons                   | 2.43E-02 | GDF15                     | 1 |
| Cell Death and Survival Cellular Growth and Proliferation         | loss of facial motor neurons                   | 2.43E-02 | GDF15                     | 1 |
|                                                                   | proliferation of neuroepithelial cells         | 2.43E-02 | GATA2                     | 1 |
| Organ Morphology Hair and Skin Development and Function           | quantity of hair                               | 2.43E-02 | BMP7                      | 1 |
|                                                                   | quantity of hair                               | 2.43E-02 | BMP7                      | 1 |
| Digestive System Development and Function                         | quantity of hair                               | 2.43E-02 | BMP7                      | 1 |
|                                                                   | development of palate                          | 2.64E-02 | ASPH,PKDCC                | 2 |
| Carbohydrate Metabolism                                           | development of palate                          | 2.64E-02 | ASPH,PKDCC                | 2 |
|                                                                   | gluconeogenesis                                | 2.64E-02 | ATF4,FBP1                 | 2 |

|                                                             |                                          |          |                 |   |
|-------------------------------------------------------------|------------------------------------------|----------|-----------------|---|
| Hematological System<br>Development and<br>Function         | homeostasis of blood                     | 2.64E-02 | COMT,GPX3       | 2 |
| Cell Death and Survival                                     | cell death of prostate cancer cell lines | 2.67E-02 | AGR2,BMP7,GDF15 | 3 |
| Organ Morphology                                            | abnormal morphology of placenta          | 2.71E-02 | COMT,ERN1       | 2 |
| Reproductive System<br>Development and<br>Function          | abnormal morphology of placenta          | 2.71E-02 | COMT,ERN1       | 2 |
| Connective Tissue<br>Development and<br>Function            | morphology of skull                      | 2.71E-02 | ATF4,BMP7,PKDCC | 3 |
| Embryonic<br>Development                                    | morphology of skull                      | 2.71E-02 | ATF4,BMP7,PKDCC | 3 |
| Organ Development                                           | morphology of skull                      | 2.71E-02 | ATF4,BMP7,PKDCC | 3 |
| Organ Morphology                                            | morphology of skull                      | 2.71E-02 | ATF4,BMP7,PKDCC | 3 |
| Organismal<br>Development                                   | morphology of skull                      | 2.71E-02 | ATF4,BMP7,PKDCC | 3 |
| Skeletal and Muscular<br>System Development<br>and Function | morphology of skull                      | 2.71E-02 | ATF4,BMP7,PKDCC | 3 |
| Tissue Development                                          | morphology of skull                      | 2.71E-02 | ATF4,BMP7,PKDCC | 3 |
| Connective Tissue<br>Development and<br>Function            | abnormal morphology of palate bone       | 2.77E-02 | PKDCC           | 1 |
| Embryonic<br>Development                                    | abnormal morphology of palate bone       | 2.77E-02 | PKDCC           | 1 |
| Organ Development                                           | abnormal morphology of palate bone       | 2.77E-02 | PKDCC           | 1 |
| Organ Morphology                                            | abnormal morphology of palate bone       | 2.77E-02 | PKDCC           | 1 |
| Organismal<br>Development                                   | abnormal morphology of palate bone       | 2.77E-02 | PKDCC           | 1 |
| Skeletal and Muscular<br>System Development<br>and Function | abnormal morphology of palate bone       | 2.77E-02 | PKDCC           | 1 |
| Tissue Development                                          | abnormal morphology of palate bone       | 2.77E-02 | PKDCC           | 1 |
| Organ Morphology                                            | abnormal morphology of vas deferens      | 2.77E-02 | ATF4            | 1 |
| Reproductive System<br>Development and<br>Function          | abnormal morphology of vas deferens      | 2.77E-02 | ATF4            | 1 |
| Cellular Assembly and<br>Organization                       | accumulation of zymogen granules         | 2.77E-02 | ITPR2           | 1 |
| Embryonic<br>Development                                    | angiogenesis of retina                   | 2.77E-02 | WARS            | 1 |
| Organ Development                                           | angiogenesis of retina                   | 2.77E-02 | WARS            | 1 |
| Organismal<br>Development                                   | angiogenesis of retina                   | 2.77E-02 | WARS            | 1 |



|                                                              |                                      |          |                          |   |
|--------------------------------------------------------------|--------------------------------------|----------|--------------------------|---|
| Tissue Development<br>Visual System                          | angiogenesis of retina               | 2.77E-02 | WARS                     | 1 |
| Development and<br>Function                                  | angiogenesis of retina               | 2.77E-02 | WARS                     | 1 |
| Cardiovascular System<br>Development and<br>Function         | angiogenesis of retina               | 2.77E-02 | WARS                     | 1 |
| DNA Replication,<br>Recombination, and<br>Repair             | annealing of DNA                     | 2.77E-02 | EVL                      | 1 |
| Cellular Development<br>Cellular Growth and<br>Proliferation | arrest in growth of epithelial cells | 2.77E-02 | GDF15                    | 1 |
| Cell Morphology                                              | arrest in growth of epithelial cells | 2.77E-02 | GDF15                    | 1 |
| Cancer                                                       | autophagy of cancer cells            | 2.77E-02 | ATF4                     | 1 |
| Cellular Function and<br>Maintenance                         | autophagy of cancer cells            | 2.77E-02 | ATF4                     | 1 |
| Ophthalmic Disease                                           | eyelids fail to open                 | 2.77E-02 | ATF4                     | 1 |
| Skeletal and Muscular<br>Disorders                           | eyelids fail to open                 | 2.77E-02 | ATF4                     | 1 |
| Small Molecule<br>Biochemistry                               | metabolism of S-adenosylmethionine   | 2.77E-02 | COMT                     | 1 |
| Amino Acid<br>Metabolism                                     | metabolism of S-adenosylmethionine   | 2.77E-02 | COMT                     | 1 |
| Nucleic Acid<br>Metabolism                                   | metabolism of S-adenosylmethionine   | 2.77E-02 | COMT                     | 1 |
| Small Molecule<br>Biochemistry                               | metabolism of fructose-6-phosphate   | 2.77E-02 | FBP1                     | 1 |
| Carbohydrate<br>Metabolism                                   | metabolism of fructose-6-phosphate   | 2.77E-02 | FBP1                     | 1 |
| Cell-To-Cell Signaling<br>and Interaction                    | metabolism of norepinephrine         | 2.77E-02 | COMT                     | 1 |
| Small Molecule<br>Biochemistry                               | metabolism of norepinephrine         | 2.77E-02 | COMT                     | 1 |
| Drug Metabolism                                              | metabolism of norepinephrine         | 2.77E-02 | COMT                     | 1 |
| Gastrointestinal<br>Disease                                  | steatorrhea                          | 2.77E-02 | ITPR2                    | 1 |
| Cellular Development<br>Cellular Growth and<br>Proliferation | proliferation of cancer cells        | 2.84E-02 | BMP7,GDF15,NR4A2,SEC14L2 | 4 |
| Tumor Morphology                                             | proliferation of cancer cells        | 2.84E-02 | BMP7,GDF15,NR4A2,SEC14L2 | 4 |
| Small Molecule<br>Biochemistry                               | steroidogenesis                      | 2.90E-02 | BMP7,NR4A2,SEC14L2       | 3 |
| Lipid Metabolism                                             | steroidogenesis                      | 2.90E-02 | BMP7,NR4A2,SEC14L2       | 3 |
| Ophthalmic Disease                                           | microphthalmia                       | 2.99E-02 | ATF4,BMP7                | 2 |
| Developmental<br>Disorder                                    | microphthalmia                       | 2.99E-02 | ATF4,BMP7                | 2 |
| Organ Morphology                                             | morphology of uterus                 | 2.99E-02 | ACSL4,COMT               | 2 |
| Reproductive System<br>Development and<br>Function           | morphology of uterus                 | 2.99E-02 | ACSL4,COMT               | 2 |

|                                                    |                                                                        |          |       |   |
|----------------------------------------------------|------------------------------------------------------------------------|----------|-------|---|
| Organ Morphology                                   | abnormal morphology of enterocytes                                     | 3.12E-02 | AGR2  | 1 |
| Cell Morphology                                    | abnormal morphology of enterocytes                                     | 3.12E-02 | AGR2  | 1 |
| Digestive System<br>Development and<br>Function    | abnormal morphology of enterocytes                                     | 3.12E-02 | AGR2  | 1 |
| Tissue Morphology                                  | abnormal morphology of nasal capsule                                   | 3.12E-02 | BMP7  | 1 |
| Developmental<br>Disorder                          | brachyphalangia                                                        | 3.12E-02 | BMP7  | 1 |
| Hereditary Disorder                                | brachyphalangia                                                        | 3.12E-02 | BMP7  | 1 |
| Skeletal and Muscular<br>Disorders                 | brachyphalangia                                                        | 3.12E-02 | BMP7  | 1 |
| Connective Tissue<br>Disorders                     | brachyphalangia                                                        | 3.12E-02 | BMP7  | 1 |
| Cancer                                             | development of pathological cyst                                       | 3.12E-02 | WWTR1 | 1 |
| Embryonic<br>Development                           | development of retinal rods                                            | 3.12E-02 | ALMS1 | 1 |
| Organ Development                                  | development of retinal rods                                            | 3.12E-02 | ALMS1 | 1 |
| Organismal<br>Development                          | development of retinal rods                                            | 3.12E-02 | ALMS1 | 1 |
| Tissue Development                                 | development of retinal rods                                            | 3.12E-02 | ALMS1 | 1 |
| Cellular Development                               | development of retinal rods                                            | 3.12E-02 | ALMS1 | 1 |
| Visual System<br>Development and<br>Function       | development of retinal rods                                            | 3.12E-02 | ALMS1 | 1 |
| Cellular Function and<br>Maintenance               | endoplasmic reticulum stress response<br>of cervical cancer cell lines | 3.12E-02 | ATF4  | 1 |
| Cellular Compromise                                | endoplasmic reticulum stress response<br>of cervical cancer cell lines | 3.12E-02 | ATF4  | 1 |
| Organ Development                                  | function of ovary                                                      | 3.12E-02 | BMP7  | 1 |
| Reproductive System<br>Development and<br>Function | function of ovary                                                      | 3.12E-02 | BMP7  | 1 |
| Cardiovascular Disease                             | intimal hyperplasia                                                    | 3.12E-02 | ERN1  | 1 |
| Cancer                                             | intimal hyperplasia                                                    | 3.12E-02 | ERN1  | 1 |
| Cellular Movement                                  | invasion of stomach cancer cell lines                                  | 3.12E-02 | GDF15 | 1 |
| Cellular Development                               | metastasis of mammary tumor cells                                      | 3.12E-02 | BMP7  | 1 |
| Cellular Growth and<br>Proliferation               | metastasis of mammary tumor cells                                      | 3.12E-02 | BMP7  | 1 |
| Cancer                                             | metastasis of mammary tumor cells                                      | 3.12E-02 | BMP7  | 1 |
| Tumor Morphology                                   | metastasis of mammary tumor cells                                      | 3.12E-02 | BMP7  | 1 |
| Reproductive System<br>Disease                     | metastasis of mammary tumor cells                                      | 3.12E-02 | BMP7  | 1 |

|                                                       |                                                  |          |                                                                                                                                                 |    |
|-------------------------------------------------------|--------------------------------------------------|----------|-------------------------------------------------------------------------------------------------------------------------------------------------|----|
| Digestive System Development and Function             | quantity of tooth                                | 3.12E-02 | BMP7                                                                                                                                            | 1  |
| Cellular Function and Maintenance                     | organization of actin filaments                  | 3.14E-02 | AKAP2/PALM2-AKAP2,EVL                                                                                                                           | 2  |
| Cellular Assembly and Organization                    | organization of actin filaments                  | 3.14E-02 | AKAP2/PALM2-AKAP2,EVL                                                                                                                           | 2  |
| Cellular Growth and Proliferation                     | proliferation of cells                           | 3.27E-02 | ACSL4,ALMS1,ASPH,ATF4,BMP7,CCDC92,COMT,FBP1,GATA2,GDF15,GLRX,GPX3,MSMB,NEU1,NR4A2,SEC14L2,TESC,TRAF1,UNC5B,WARS,WWTR1                           | 21 |
| Cancer                                                | Cancer                                           | 3.28E-02 | AGR2,ASPH,BMP7,COMT,EMCN,EVL,GATA2,GDF15,GLRX,GPX3,GUK1,HYOU1,KCNK6,MSMB,NEU1,NR4A2,PDE4B,PDIA6,SEC63 (includes EG:11231),SPON2,SRMS,WARS,WWTR1 | 23 |
| Cancer                                                | genital tumor                                    | 3.44E-02 | AGR2,ASPH,BMP7,EVL,GDF15,GPX3,KCNK6,MSMB                                                                                                        | 8  |
| Reproductive System Disease                           | genital tumor                                    | 3.44E-02 | AGR2,ASPH,BMP7,EVL,GDF15,GPX3,KCNK6,MSMB                                                                                                        | 8  |
| Connective Tissue Development and Function            | abnormal morphology of clavicle                  | 3.46E-02 | ATF4                                                                                                                                            | 1  |
| Embryonic Development                                 | abnormal morphology of clavicle                  | 3.46E-02 | ATF4                                                                                                                                            | 1  |
| Organ Development                                     | abnormal morphology of clavicle                  | 3.46E-02 | ATF4                                                                                                                                            | 1  |
| Organ Morphology                                      | abnormal morphology of clavicle                  | 3.46E-02 | ATF4                                                                                                                                            | 1  |
| Organismal Development                                | abnormal morphology of clavicle                  | 3.46E-02 | ATF4                                                                                                                                            | 1  |
| Skeletal and Muscular System Development and Function | abnormal morphology of clavicle                  | 3.46E-02 | ATF4                                                                                                                                            | 1  |
| Tissue Development                                    | abnormal morphology of clavicle                  | 3.46E-02 | ATF4                                                                                                                                            | 1  |
| Organismal Development                                | abnormal morphology of molar tooth               | 3.46E-02 | BMP7                                                                                                                                            | 1  |
| Digestive System Development and Function             | abnormal morphology of molar tooth               | 3.46E-02 | BMP7                                                                                                                                            | 1  |
| Cell Cycle                                            | arrest in G1 phase of prostate cancer cell lines | 3.46E-02 | BMP7                                                                                                                                            | 1  |
| Antimicrobial Response                                | clearance of Influenza virus                     | 3.46E-02 | SPON2                                                                                                                                           | 1  |
| Digestive System Development and Function             | defecation                                       | 3.46E-02 | ITPR2                                                                                                                                           | 1  |
| Gastrointestinal Disease                              | experimental intestinal endometriosis            | 3.46E-02 | TRAF1                                                                                                                                           | 1  |
| Reproductive System Disease                           | experimental intestinal endometriosis            | 3.46E-02 | TRAF1                                                                                                                                           | 1  |
| Cellular Growth and Proliferation                     | formation of megakaryocytes                      | 3.46E-02 | GATA2                                                                                                                                           | 1  |
| Hematological System Development and Function         | formation of megakaryocytes                      | 3.46E-02 | GATA2                                                                                                                                           | 1  |

|                                                          |                                       |          |                  |   |
|----------------------------------------------------------|---------------------------------------|----------|------------------|---|
| Lymphoid Tissue Structure and Development                | formation of megakaryocytes           | 3.46E-02 | GATA2            | 1 |
| Hematopoiesis Embryonic Development                      | formation of megakaryocytes           | 3.46E-02 | GATA2            | 1 |
| Organismal Development                                   | formation of prostatic bud            | 3.46E-02 | BMP7             | 1 |
| Tissue Development                                       | formation of prostatic bud            | 3.46E-02 | BMP7             | 1 |
| Organ Development Embryonic Development                  | function of salivary gland            | 3.46E-02 | ITPR2            | 1 |
| Organismal Development                                   | fusion of allantois                   | 3.46E-02 | BMP7             | 1 |
| Tissue Morphology Embryonic Development                  | fusion of allantois                   | 3.46E-02 | BMP7             | 1 |
| Organismal Development                                   | fusion of allantois                   | 3.46E-02 | BMP7             | 1 |
| Tissue Morphology Embryonic Development                  | fusion of chorion                     | 3.46E-02 | BMP7             | 1 |
| Organismal Development                                   | fusion of chorion                     | 3.46E-02 | BMP7             | 1 |
| Tissue Morphology                                        | fusion of chorion                     | 3.46E-02 | BMP7             | 1 |
| Cancer                                                   | juvenile myelomonocytic leukemia      | 3.46E-02 | GATA2            | 1 |
| Hematological Disease                                    | juvenile myelomonocytic leukemia      | 3.46E-02 | GATA2            | 1 |
| Cell Death and Survival                                  | killing of breast cancer cell lines   | 3.46E-02 | GLRX             | 1 |
| Cell Morphology                                          | morphology of breast cell lines       | 3.46E-02 | WWTR1            | 1 |
| Reproductive System Development and Function             | morphology of breast cell lines       | 3.46E-02 | WWTR1            | 1 |
| Cell Morphology                                          | morphology of endothelial cell lines  | 3.46E-02 | BMP7             | 1 |
| Cardiovascular System Development and Function           | morphology of endothelial cell lines  | 3.46E-02 | BMP7             | 1 |
| Cancer Organismal Injury and Abnormalities               | myelofibrosis with myeloid metaplasia | 3.46E-02 | BMP7             | 1 |
| Hematological Disease Cellular Assembly and Organization | myelofibrosis with myeloid metaplasia | 3.46E-02 | BMP7             | 1 |
| Cell Death and Survival Small Molecule Biochemistry      | remodeling of actin cytoskeleton      | 3.46E-02 | EVL              | 1 |
| Lipid Metabolism                                         | apoptosis of epithelial cells         | 3.52E-02 | BMP7,GDF15,UNC5B | 3 |
| Cellular Function and Maintenance                        | metabolism of triacylglycerol         | 3.66E-02 | ACSL4,ALMS1      | 2 |
| Cellular Assembly and Organization                       | metabolism of triacylglycerol         | 3.66E-02 | ACSL4,ALMS1      | 2 |
|                                                          | stabilization of microtubules         | 3.66E-02 | BMP7,ERN1        | 2 |
|                                                          | stabilization of microtubules         | 3.66E-02 | BMP7,ERN1        | 2 |

|                                                       |                                                        |          |                 |   |
|-------------------------------------------------------|--------------------------------------------------------|----------|-----------------|---|
| Skeletal and Muscular System Development and Function | differentiation of osteoblasts                         | 3.74E-02 | ATF4,BMP7,WWTR1 | 3 |
| Cellular Development                                  | differentiation of osteoblasts                         | 3.74E-02 | ATF4,BMP7,WWTR1 | 3 |
| Cell-To-Cell Signaling and Interaction                | concentration of dopamine                              | 3.74E-02 | COMT,NR4A2      | 2 |
| Small Molecule                                        |                                                        |          |                 |   |
| Biochemistry                                          | concentration of dopamine                              | 3.74E-02 | COMT,NR4A2      | 2 |
| Drug Metabolism                                       | concentration of dopamine                              | 3.74E-02 | COMT,NR4A2      | 2 |
| Molecular Transport                                   | concentration of dopamine                              | 3.74E-02 | COMT,NR4A2      | 2 |
| Embryonic Development                                 | differentiation of embryonic stem cells                | 3.74E-02 | NR4A2,WWTR1     | 2 |
| Cellular Development                                  | differentiation of embryonic stem cells                | 3.74E-02 | NR4A2,WWTR1     | 2 |
| Cellular Development                                  | epithelial-mesenchymal transition of kidney cell lines | 3.80E-02 | BMP7            | 1 |
| Cellular Growth and Proliferation                     | formation of epithelial cells                          | 3.80E-02 | BMP7            | 1 |
| Small Molecule                                        |                                                        |          |                 |   |
| Biochemistry                                          | homeostasis of Na+                                     | 3.80E-02 | TESC            | 1 |
| Cellular Function and Maintenance                     | homeostasis of Na+                                     | 3.80E-02 | TESC            | 1 |
| Infectious Disease                                    | infection by human T-lymphotropic virus type 1         | 3.80E-02 | PDE4B           | 1 |
| Cellular Development                                  | maturation of mast cells                               | 3.80E-02 | GATA2           | 1 |
| Hematological System Development and Function         | maturation of mast cells                               | 3.80E-02 | GATA2           | 1 |
| Hematopoiesis                                         | maturation of mast cells                               | 3.80E-02 | GATA2           | 1 |
| Tissue Development                                    | morphogenesis of endothelial tube                      | 3.80E-02 | BMP7            | 1 |
| Cardiovascular System Development and Function        | morphogenesis of endothelial tube                      | 3.80E-02 | BMP7            | 1 |
| Embryonic Development                                 | morphogenesis of salivary gland                        | 3.80E-02 | BMP7            | 1 |
| Organ Development                                     | morphogenesis of salivary gland                        | 3.80E-02 | BMP7            | 1 |
| Organ Morphology                                      | morphogenesis of salivary gland                        | 3.80E-02 | BMP7            | 1 |
| Organismal Development                                | morphogenesis of salivary gland                        | 3.80E-02 | BMP7            | 1 |
| Tissue Development                                    | morphogenesis of salivary gland                        | 3.80E-02 | BMP7            | 1 |
| Digestive System Development and Function             | morphogenesis of salivary gland                        | 3.80E-02 | BMP7            | 1 |
| Cell Morphology                                       | morphology of neuroblastoma cell lines                 | 3.80E-02 | BMP7            | 1 |
| Nervous System Development and Function               | quantity of neuroepithelial cells                      | 3.80E-02 | BMP7            | 1 |
| Tissue Morphology                                     | quantity of neuroepithelial cells                      | 3.80E-02 | BMP7            | 1 |

|                                                       |                                          |          |                                                                   |    |
|-------------------------------------------------------|------------------------------------------|----------|-------------------------------------------------------------------|----|
| Metabolic Disease                                     | glucose metabolism disorder              | 3.90E-02 | ACSL4,BMP7,ERN1,GDF15,HYOU1,ITPR2,NR4A2,PDE4B                     | 8  |
| Developmental Disorder                                | cleft palate syndrome                    | 4.06E-02 | ASPH,BMP7                                                         | 2  |
| Gastrointestinal Disease                              | cleft palate syndrome                    | 4.06E-02 | ASPH,BMP7                                                         | 2  |
| Cellular Movement                                     | migration of cells                       | 4.10E-02 | ACSL4,BMP7,EVL,GATA2,GLRX,NEU1,NR4A2,PDE4B,SPON2,UNC5B,WARS,WWTR1 | 12 |
| Connective Tissue Development and Function            | abnormal morphology of cricoid cartilage | 4.13E-02 | BMP7                                                              | 1  |
| Skeletal and Muscular System Development and Function | abnormal morphology of cricoid cartilage | 4.13E-02 | BMP7                                                              | 1  |
| Tissue Morphology                                     | abnormal morphology of cricoid cartilage | 4.13E-02 | BMP7                                                              | 1  |
| Connective Tissue Development and Function            | abnormal morphology of fontanelle        | 4.13E-02 | ATF4                                                              | 1  |
| Embryonic Development                                 | abnormal morphology of fontanelle        | 4.13E-02 | ATF4                                                              | 1  |
| Organ Development                                     | abnormal morphology of fontanelle        | 4.13E-02 | ATF4                                                              | 1  |
| Organ Morphology                                      | abnormal morphology of fontanelle        | 4.13E-02 | ATF4                                                              | 1  |
| Organismal Development                                | abnormal morphology of fontanelle        | 4.13E-02 | ATF4                                                              | 1  |
| Skeletal and Muscular System Development and Function | abnormal morphology of fontanelle        | 4.13E-02 | ATF4                                                              | 1  |
| Tissue Development                                    | abnormal morphology of fontanelle        | 4.13E-02 | ATF4                                                              | 1  |
| Organ Morphology                                      | abnormal morphology of nasal septum      | 4.13E-02 | BMP7                                                              | 1  |
| Cell-To-Cell Signaling and Interaction                | activation of alveolar macrophages       | 4.13E-02 | SPON2                                                             | 1  |
| Hematological System Development and Function         | activation of alveolar macrophages       | 4.13E-02 | SPON2                                                             | 1  |
| Inflammatory Response                                 | activation of alveolar macrophages       | 4.13E-02 | SPON2                                                             | 1  |
| Immune Cell Trafficking                               | activation of alveolar macrophages       | 4.13E-02 | SPON2                                                             | 1  |
| Cancer                                                | blast crisis                             | 4.13E-02 | GATA2                                                             | 1  |
| Hematological Disease                                 | blast crisis                             | 4.13E-02 | GATA2                                                             | 1  |
| Carbohydrate Metabolism                               | glycogenolysis                           | 4.13E-02 | ERN1                                                              | 1  |
| Renal and Urological Disease                          | hydroureter                              | 4.13E-02 | BMP7                                                              | 1  |
| Cell Morphology                                       | lack of myeloid progenitor cells         | 4.13E-02 | ATF4                                                              | 1  |
| Tissue Morphology                                     | lack of myeloid progenitor cells         | 4.13E-02 | ATF4                                                              | 1  |

|                                    |                                                |          |            |   |
|------------------------------------|------------------------------------------------|----------|------------|---|
| Hematological System               |                                                |          |            |   |
| Development and Function           | lack of myeloid progenitor cells               | 4.13E-02 | ATF4       | 1 |
| Lymphoid Tissue                    |                                                |          |            |   |
| Structure and Development          | lack of myeloid progenitor cells               | 4.13E-02 | ATF4       | 1 |
| Hematopoiesis                      | lack of myeloid progenitor cells               | 4.13E-02 | ATF4       | 1 |
| Small Molecule                     |                                                |          |            |   |
| Biochemistry                       | metabolism of S-adenosylhomocysteine           | 4.13E-02 | COMT       | 1 |
| Amino Acid Metabolism              | metabolism of S-adenosylhomocysteine           | 4.13E-02 | COMT       | 1 |
| Nucleic Acid Metabolism            | metabolism of S-adenosylhomocysteine           | 4.13E-02 | COMT       | 1 |
| Cell Morphology                    | morphogenesis of cilia                         | 4.13E-02 | WWTR1      | 1 |
| Cellular Function and Maintenance  | morphogenesis of cilia                         | 4.13E-02 | WWTR1      | 1 |
| Cellular Assembly and Organization | morphogenesis of cilia                         | 4.13E-02 | WWTR1      | 1 |
| Embryonic Development              | self-renewal of embryonic stem cells           | 4.13E-02 | WWTR1      | 1 |
| Cellular Development               | self-renewal of embryonic stem cells           | 4.13E-02 | WWTR1      | 1 |
| Cellular Growth and Proliferation  | self-renewal of embryonic stem cells           | 4.13E-02 | WWTR1      | 1 |
| Cell Death and Survival            | self-renewal of embryonic stem cells           | 4.13E-02 | WWTR1      | 1 |
| Cellular Function and Maintenance  | self-renewal of embryonic stem cells           | 4.13E-02 | WWTR1      | 1 |
| Embryonic Development              | development of placenta                        | 4.39E-02 | COMT,GATA2 | 2 |
| Organ Development                  | development of placenta                        | 4.39E-02 | COMT,GATA2 | 2 |
| Organismal Development             | development of placenta                        | 4.39E-02 | COMT,GATA2 | 2 |
| Tissue Development                 | development of placenta                        | 4.39E-02 | COMT,GATA2 | 2 |
| Reproductive System                |                                                |          |            |   |
| Development and Function           | development of placenta                        | 4.39E-02 | COMT,GATA2 | 2 |
| Tissue Morphology                  | abnormal morphology of apical ectodermal ridge | 4.47E-02 | BMP7       | 1 |
| Connective Tissue                  |                                                |          |            |   |
| Development and Function           | abnormal morphology of caudal vertebra         | 4.47E-02 | PKDCC      | 1 |
| Embryonic Development              | abnormal morphology of caudal vertebra         | 4.47E-02 | PKDCC      | 1 |
| Organ Development                  | abnormal morphology of caudal vertebra         | 4.47E-02 | PKDCC      | 1 |
| Organ Morphology                   | abnormal morphology of caudal vertebra         | 4.47E-02 | PKDCC      | 1 |
| Organismal Development             | abnormal morphology of caudal vertebra         | 4.47E-02 | PKDCC      | 1 |
| Skeletal and Muscular System       |                                                |          |            |   |
| Development and Function           | abnormal morphology of caudal vertebra         | 4.47E-02 | PKDCC      | 1 |

|                                                             |                                              |          |       |   |
|-------------------------------------------------------------|----------------------------------------------|----------|-------|---|
| Tissue Development<br>Nervous System                        | abnormal morphology of caudal<br>vertebra    | 4.47E-02 | PKDCC | 1 |
| Development and<br>Function                                 | abnormal morphology of caudal<br>vertebra    | 4.47E-02 | PKDCC | 1 |
| Organ Morphology                                            | abnormal morphology of endometrium           | 4.47E-02 | ACSL4 | 1 |
| Reproductive System<br>Development and<br>Function          | abnormal morphology of endometrium           | 4.47E-02 | ACSL4 | 1 |
| Organ Morphology                                            | abnormal morphology of glomerular<br>capsule | 4.47E-02 | BMP7  | 1 |
| Renal and Urological<br>System Development<br>and Function  | abnormal morphology of glomerular<br>capsule | 4.47E-02 | BMP7  | 1 |
| Embryonic<br>Development                                    | abnormal morphology of iris                  | 4.47E-02 | ATF4  | 1 |
| Organ Development                                           | abnormal morphology of iris                  | 4.47E-02 | ATF4  | 1 |
| Organ Morphology                                            | abnormal morphology of iris                  | 4.47E-02 | ATF4  | 1 |
| Organismal<br>Development                                   | abnormal morphology of iris                  | 4.47E-02 | ATF4  | 1 |
| Tissue Development<br>Visual System                         | abnormal morphology of iris                  | 4.47E-02 | ATF4  | 1 |
| Development and<br>Function                                 | abnormal morphology of iris                  | 4.47E-02 | ATF4  | 1 |
| Connective Tissue<br>Development and<br>Function            | abnormal morphology of pterygoid<br>bone     | 4.47E-02 | BMP7  | 1 |
| Embryonic<br>Development                                    | abnormal morphology of pterygoid<br>bone     | 4.47E-02 | BMP7  | 1 |
| Organ Development                                           | abnormal morphology of pterygoid<br>bone     | 4.47E-02 | BMP7  | 1 |
| Organ Morphology                                            | abnormal morphology of pterygoid<br>bone     | 4.47E-02 | BMP7  | 1 |
| Organismal<br>Development                                   | abnormal morphology of pterygoid<br>bone     | 4.47E-02 | BMP7  | 1 |
| Skeletal and Muscular<br>System Development<br>and Function | abnormal morphology of pterygoid<br>bone     | 4.47E-02 | BMP7  | 1 |
| Tissue Development<br>Connective Tissue                     | abnormal morphology of pterygoid<br>bone     | 4.47E-02 | BMP7  | 1 |
| Development and<br>Function                                 | abnormal morphology of temporal<br>bone      | 4.47E-02 | BMP7  | 1 |
| Embryonic<br>Development                                    | abnormal morphology of temporal<br>bone      | 4.47E-02 | BMP7  | 1 |
| Organ Development                                           | abnormal morphology of temporal<br>bone      | 4.47E-02 | BMP7  | 1 |
| Organ Morphology                                            | abnormal morphology of temporal<br>bone      | 4.47E-02 | BMP7  | 1 |
| Organismal<br>Development                                   | abnormal morphology of temporal<br>bone      | 4.47E-02 | BMP7  | 1 |



|                                                       |                                        |          |                      |   |
|-------------------------------------------------------|----------------------------------------|----------|----------------------|---|
| Skeletal and Muscular System Development and Function | abnormal morphology of temporal bone   | 4.47E-02 | BMP7                 | 1 |
| Tissue Development                                    | abnormal morphology of temporal bone   | 4.47E-02 | BMP7                 | 1 |
| Cell Morphology                                       | autophagy of breast cancer cell lines  | 4.47E-02 | ATF4                 | 1 |
| Cellular Function and Maintenance                     | autophagy of breast cancer cell lines  | 4.47E-02 | ATF4                 | 1 |
| Cellular Function and Maintenance                     | formation of actin cytoskeleton        | 4.47E-02 | AKAP2/PALM2-AKAP2    | 1 |
| Cellular Assembly and Organization                    | formation of actin cytoskeleton        | 4.47E-02 | AKAP2/PALM2-AKAP2    | 1 |
| Cardiovascular Disease                                | intermittent claudication              | 4.47E-02 | PDE4B                | 1 |
| Small Molecule Biochemistry                           | metabolism of L-glutamic acid          | 4.47E-02 | CCDC92               | 1 |
| Amino Acid Metabolism                                 | metabolism of L-glutamic acid          | 4.47E-02 | CCDC92               | 1 |
| Behavior                                              | emotional behavior                     | 4.49E-02 | COMT,FXR2,NR4A2      | 3 |
| Digestive System Development and Function             | development of digestive system        | 4.51E-02 | ASPH,BMP7,ERN1,PKDCC | 4 |
| Connective Tissue Development and Function            | abnormal morphology of ala temporali   | 4.81E-02 | BMP7                 | 1 |
| Embryonic Development                                 | abnormal morphology of ala temporali   | 4.81E-02 | BMP7                 | 1 |
| Organ Development                                     | abnormal morphology of ala temporali   | 4.81E-02 | BMP7                 | 1 |
| Organ Morphology                                      | abnormal morphology of ala temporali   | 4.81E-02 | BMP7                 | 1 |
| Organismal Development                                | abnormal morphology of ala temporali   | 4.81E-02 | BMP7                 | 1 |
| Skeletal and Muscular System Development and Function | abnormal morphology of ala temporali   | 4.81E-02 | BMP7                 | 1 |
| Tissue Development                                    | abnormal morphology of ala temporali   | 4.81E-02 | BMP7                 | 1 |
| Organ Morphology                                      | abnormal morphology of decidua basalis | 4.81E-02 | COMT                 | 1 |
| Reproductive System Development and Function          | abnormal morphology of decidua basalis | 4.81E-02 | COMT                 | 1 |
| Tissue Development                                    | adhesion of carcinoma cell lines       | 4.81E-02 | NEU1                 | 1 |
| Cell-To-Cell Signaling and Interaction                | adhesion of carcinoma cell lines       | 4.81E-02 | NEU1                 | 1 |
| Embryonic Development                                 | apoptosis of mesenchymal cells         | 4.81E-02 | BMP7                 | 1 |
| Cell Death and Survival                               | apoptosis of mesenchymal cells         | 4.81E-02 | BMP7                 | 1 |
| Embryonic Development                                 | development of allantois               | 4.81E-02 | BMP7                 | 1 |

|                                                |                                                                          |          |                   |   |
|------------------------------------------------|--------------------------------------------------------------------------|----------|-------------------|---|
| Organismal Development                         | development of allantois                                                 | 4.81E-02 | BMP7              | 1 |
| Tissue Development                             | development of allantois                                                 | 4.81E-02 | BMP7              | 1 |
| Organismal Development                         | development of erythroid cells                                           | 4.81E-02 | GATA2             | 1 |
| Tissue Development                             | development of erythroid cells                                           | 4.81E-02 | GATA2             | 1 |
| Cellular Development                           | development of erythroid cells                                           | 4.81E-02 | GATA2             | 1 |
| Hematological System Development and Function  | development of erythroid cells                                           | 4.81E-02 | GATA2             | 1 |
| Hematopoiesis                                  | development of erythroid cells                                           | 4.81E-02 | GATA2             | 1 |
| Cardiovascular System Development and Function | development of erythroid cells                                           | 4.81E-02 | GATA2             | 1 |
| Neurological Disease                           | familial Parkinson disease                                               | 4.81E-02 | NR4A2             | 1 |
| Hereditary Disorder                            | familial Parkinson disease                                               | 4.81E-02 | NR4A2             | 1 |
| Skeletal and Muscular Disorders                | familial Parkinson disease                                               | 4.81E-02 | NR4A2             | 1 |
| Cellular Movement                              | migration of lung cell lines                                             | 4.81E-02 | NEU1              | 1 |
| Respiratory System Development and Function    | migration of lung cell lines                                             | 4.81E-02 | NEU1              | 1 |
| Small Molecule Biochemistry                    | oxidation of oleic acid                                                  | 4.81E-02 | ACSL4             | 1 |
| Lipid Metabolism                               | oxidation of oleic acid                                                  | 4.81E-02 | ACSL4             | 1 |
| Energy Production                              | oxidation of oleic acid                                                  | 4.81E-02 | ACSL4             | 1 |
| Cell-To-Cell Signaling and Interaction         | response of bone marrow-derived macrophages                              | 4.81E-02 | SPON2             | 1 |
| Inflammatory Response                          | response of bone marrow-derived macrophages                              | 4.81E-02 | SPON2             | 1 |
| Cell Signaling                                 | transmembrane receptor protein serine/threonine kinase signaling pathway | 4.81E-02 | AKAP2/PALM2-AKAP2 | 1 |
| Nervous System Development and Function        | sensory system development                                               | 4.98E-02 | BMP7,GDF15        | 2 |
| Neurological Disease                           | Parkinson's disease                                                      | 4.99E-02 | COMT,NR4A2,PDE4B  | 3 |
| Skeletal and Muscular Disorders                | Parkinson's disease                                                      | 4.99E-02 | COMT,NR4A2,PDE4B  | 3 |

#### PTEN Loss Unchanged, ERG Down

| Category               | Term                                    | Count    | P-Value                                    | Genes |
|------------------------|-----------------------------------------|----------|--------------------------------------------|-------|
| Developmental Disorder | inborn error of carbohydrate metabolism | 1.52E-04 | AGL,ALG9,PHKB,SLC35A1                      | 4     |
| Hereditary Disorder    | inborn error of carbohydrate metabolism | 1.52E-04 | AGL,ALG9,PHKB,SLC35A1                      | 4     |
| Metabolic Disease      | inborn error of carbohydrate metabolism | 1.52E-04 | AGL,ALG9,PHKB,SLC35A1                      | 4     |
| Amino Acid Metabolism  | quantity of amino acids                 | 3.52E-04 | ARG2 (includes EG:11847),FAH,FGF1,HPN,RXRG | 5     |

|                                                      |                                          |          |                                          |   |
|------------------------------------------------------|------------------------------------------|----------|------------------------------------------|---|
| Amino Acid Metabolism                                | catabolism of arginine                   | 5.65E-04 | ARG2 (includes EG:11847),FAH             | 2 |
| Small Molecule Biochemistry                          | catabolism of arginine                   | 5.65E-04 | ARG2 (includes EG:11847),FAH             | 2 |
| Cellular Development Embryonic                       | differentiation of epidermis             | 7.04E-04 | MAPK9,TGM5                               | 2 |
| Development Hair and Skin                            | differentiation of epidermis             | 7.04E-04 | MAPK9,TGM5                               | 2 |
| Development and Function                             | differentiation of epidermis             | 7.04E-04 | MAPK9,TGM5                               | 2 |
| Organ Development Organismal                         | differentiation of epidermis             | 7.04E-04 | MAPK9,TGM5                               | 2 |
| Development                                          | differentiation of epidermis             | 7.04E-04 | MAPK9,TGM5                               | 2 |
| Tissue Development Organismal                        | differentiation of epidermis             | 7.04E-04 | MAPK9,TGM5                               | 2 |
| Development                                          | production of urine                      | 8.59E-04 | EPHB6,SCNN1G                             | 2 |
| Renal and Urological System Development and Function | production of urine                      | 8.59E-04 | EPHB6,SCNN1G                             | 2 |
| Amino Acid Metabolism                                | concentration of levothyroxine           | 8.91E-04 | FGF1,HPN,RXRG                            | 3 |
| Small Molecule Biochemistry                          | concentration of levothyroxine           | 8.91E-04 | FGF1,HPN,RXRG                            | 3 |
| Drug Metabolism                                      | concentration of levothyroxine           | 8.91E-04 | FGF1,HPN,RXRG                            | 3 |
| Endocrine System Development and Function            | concentration of levothyroxine           | 8.91E-04 | FGF1,HPN,RXRG                            | 3 |
| Molecular Transport Post-Translational               | concentration of levothyroxine           | 8.91E-04 | FGF1,HPN,RXRG                            | 3 |
| Modification                                         | homotetramerization of protein           | 8.91E-04 | ALDH1A1,DCXR,GFPT1                       | 3 |
| Protein Synthesis                                    | homotetramerization of protein           | 8.91E-04 | ALDH1A1,DCXR,GFPT1                       | 3 |
| Cellular Development Nervous System                  | differentiation of neuroepithelial cells | 1.41E-03 | FGF1,MAPK9                               | 2 |
| Development and Function                             | differentiation of neuroepithelial cells | 1.41E-03 | FGF1,MAPK9                               | 2 |
| Hematological Disease Developmental                  | thrombophilia                            | 1.41E-03 | HABP2,PROC                               | 2 |
| Disorder                                             | glycogen storage disease                 | 1.62E-03 | AGL,PHKB                                 | 2 |
| Hereditary Disorder                                  | glycogen storage disease                 | 1.62E-03 | AGL,PHKB                                 | 2 |
| Metabolic Disease                                    | glycogen storage disease                 | 1.62E-03 | AGL,PHKB                                 | 2 |
| Small Molecule Biochemistry                          | concentration of hormone                 | 1.72E-03 | CADPS2,EPHB6,FGF1,GSTK1,HPN,RASGRF1,RXRG | 7 |
| Endocrine System Development and Function            | concentration of hormone                 | 1.72E-03 | CADPS2,EPHB6,FGF1,GSTK1,HPN,RASGRF1,RXRG | 7 |
| Molecular Transport Hair and Skin                    | concentration of hormone                 | 1.72E-03 | CADPS2,EPHB6,FGF1,GSTK1,HPN,RASGRF1,RXRG | 7 |
| Development and Function                             | abnormal morphology of hair shaft        | 1.85E-03 | DNASE1L2,ST14                            | 2 |
| Organ Morphology                                     | abnormal morphology of hair shaft        | 1.85E-03 | DNASE1L2,ST14                            | 2 |

|                                        |                                                      |          |                 |   |
|----------------------------------------|------------------------------------------------------|----------|-----------------|---|
| Post-Translational Modification        | oxidation of protein                                 | 3.19E-03 | ALDH1A1,DNAJB1  | 2 |
| Protein Degradation                    | oxidation of protein                                 | 3.19E-03 | ALDH1A1,DNAJB1  | 2 |
| Developmental Disorder                 | congenital disorders of glycosylation                | 3.50E-03 | ALG9,SLC35A1    | 2 |
| Hereditary Disorder                    | congenital disorders of glycosylation                | 3.50E-03 | ALG9,SLC35A1    | 2 |
| Metabolic Disease                      | congenital disorders of glycosylation                | 3.50E-03 | ALG9,SLC35A1    | 2 |
| Organ Morphology                       | abnormal morphology of epidermis                     | 3.96E-03 | LMO4,MAPK9,ST14 | 3 |
| Cardiovascular Disease                 | accumulation of thrombus                             | 4.03E-03 | PROC            | 1 |
| Hereditary Disorder                    | acral peeling skin syndrome                          | 4.03E-03 | TGM5            | 1 |
| Dermatological Diseases and Conditions | acral peeling skin syndrome                          | 4.03E-03 | TGM5            | 1 |
| Cell-To-Cell Signaling and Interaction | activation of Purkinje cells                         | 4.03E-03 | ANK3            | 1 |
| Cellular Growth and Proliferation      | arrest in growth of chondrocyte cell lines           | 4.03E-03 | FGF1            | 1 |
| Cellular Development                   | arrest in growth of liver cancer cells               | 4.03E-03 | HPN             | 1 |
| Cellular Growth and Proliferation      | arrest in growth of liver cancer cells               | 4.03E-03 | HPN             | 1 |
| Tumor Morphology                       | arrest in growth of liver cancer cells               | 4.03E-03 | HPN             | 1 |
| Cell Cycle                             | arrest in mitosis of ovarian cancer cell lines       | 4.03E-03 | ACRBP           | 1 |
| Developmental Disorder                 | autosomal recessive ichthyosis with hypotrichosis    | 4.03E-03 | ST14            | 1 |
| Hereditary Disorder                    | autosomal recessive ichthyosis with hypotrichosis    | 4.03E-03 | ST14            | 1 |
| Dermatological Diseases and Conditions | autosomal recessive ichthyosis with hypotrichosis    | 4.03E-03 | ST14            | 1 |
| Organismal Injury and Abnormalities    | autosomal recessive ichthyosis with hypotrichosis    | 4.03E-03 | ST14            | 1 |
| Small Molecule Biochemistry            | binding of ADP                                       | 4.03E-03 | EPHB6           | 1 |
| Nucleic Acid Metabolism                | binding of ADP                                       | 4.03E-03 | EPHB6           | 1 |
| Gene Expression                        | binding of glucose response element                  | 4.03E-03 | GFPT1           | 1 |
| Gene Expression                        | binding of origin of replication in the short region | 4.03E-03 | DNAJB1          | 1 |
| Cellular Assembly and Organization     | biogenesis of lateral plasma membrane                | 4.03E-03 | ANK3            | 1 |
| Small Molecule Biochemistry            | biosynthesis of glucosamine                          | 4.03E-03 | GFPT1           | 1 |
| Carbohydrate Metabolism                | biosynthesis of glucosamine                          | 4.03E-03 | GFPT1           | 1 |
| Cell Death and Survival                | cell death of C-cells                                | 4.03E-03 | PROC            | 1 |
| Developmental Disorder                 | congenital disorder of glycosylation type 1I         | 4.03E-03 | ALG9            | 1 |

|                                                       |                                                                |          |         |   |
|-------------------------------------------------------|----------------------------------------------------------------|----------|---------|---|
| Hereditary Disorder                                   | congenital disorder of glycosylation type 1l                   | 4.03E-03 | ALG9    | 1 |
| Metabolic Disease                                     | congenital disorder of glycosylation type 1l                   | 4.03E-03 | ALG9    | 1 |
| Developmental Disorder                                | congenital disorder of glycosylation type 2f                   | 4.03E-03 | SLC35A1 | 1 |
| Hereditary Disorder                                   | congenital disorder of glycosylation type 2f                   | 4.03E-03 | SLC35A1 | 1 |
| Metabolic Disease                                     | congenital disorder of glycosylation type 2f                   | 4.03E-03 | SLC35A1 | 1 |
| Amino Acid Metabolism                                 | conversion of methotrexate                                     | 4.03E-03 | FPGS    | 1 |
| Small Molecule Biochemistry                           | conversion of methotrexate                                     | 4.03E-03 | FPGS    | 1 |
| Drug Metabolism                                       | conversion of methotrexate                                     | 4.03E-03 | FPGS    | 1 |
| Post-Translational Modification                       | conversion of methotrexate                                     | 4.03E-03 | FPGS    | 1 |
| Embryonic Development                                 | development of flexor muscle                                   | 4.03E-03 | GAB1    | 1 |
| Organ Development                                     | development of flexor muscle                                   | 4.03E-03 | GAB1    | 1 |
| Organismal Development                                | development of flexor muscle                                   | 4.03E-03 | GAB1    | 1 |
| Tissue Development                                    | development of flexor muscle                                   | 4.03E-03 | GAB1    | 1 |
| Skeletal and Muscular System Development and Function | development of flexor muscle                                   | 4.03E-03 | GAB1    | 1 |
| Cellular Movement                                     | dispersion of bladder cancer cell lines                        | 4.03E-03 | FGF1    | 1 |
| Cellular Development                                  | epithelial-mesenchymal transition of bladder cancer cell lines | 4.03E-03 | FGF1    | 1 |
| Nervous System Development and Function               | fusion of glossopharyngeal cranial nerve ganglion              | 4.03E-03 | LMO4    | 1 |
| Tissue Morphology                                     | fusion of glossopharyngeal cranial nerve ganglion              | 4.03E-03 | LMO4    | 1 |
| Nervous System Development and Function               | fusion of vagus cranial nerve ganglion                         | 4.03E-03 | LMO4    | 1 |
| Tissue Morphology                                     | fusion of vagus cranial nerve ganglion                         | 4.03E-03 | LMO4    | 1 |
| Developmental Disorder                                | glycogen storage disease IXB                                   | 4.03E-03 | PHKB    | 1 |
| Hereditary Disorder                                   | glycogen storage disease IXB                                   | 4.03E-03 | PHKB    | 1 |
| Metabolic Disease                                     | glycogen storage disease IXB                                   | 4.03E-03 | PHKB    | 1 |
| Developmental Disorder                                | glycogen storage disease type III                              | 4.03E-03 | AGL     | 1 |
| Hereditary Disorder                                   | glycogen storage disease type III                              | 4.03E-03 | AGL     | 1 |
| Metabolic Disease                                     | glycogen storage disease type III                              | 4.03E-03 | AGL     | 1 |
| Gastrointestinal Disease                              | glycogen storage disease type III                              | 4.03E-03 | AGL     | 1 |
| Hepatic System Disease                                | glycogen storage disease type III                              | 4.03E-03 | AGL     | 1 |
| Cancer                                                | growth of Wilms' tumor                                         | 4.03E-03 | TIMP4   | 1 |
| Inflammatory Response                                 | inflammation of C-cells                                        | 4.03E-03 | PROC    | 1 |

|                                                       |                                              |          |         |   |
|-------------------------------------------------------|----------------------------------------------|----------|---------|---|
| Cell-To-Cell Signaling and Interaction                | inflammation of follicular cells             | 4.03E-03 | PROC    | 1 |
| Inflammatory Response                                 | inflammation of follicular cells             | 4.03E-03 | PROC    | 1 |
| Inflammatory Response                                 | inflammation of interalveolar septa          | 4.03E-03 | PROC    | 1 |
| Respiratory Disease Inflammatory Response             | inflammation of interalveolar septa          | 4.03E-03 | PROC    | 1 |
| Cell Morphology                                       | inflammation of islets of Langerhans         | 4.03E-03 | PROC    | 1 |
| Cell Morphology                                       | length of apical membrane                    | 4.03E-03 | ANK3    | 1 |
| Cell Morphology                                       | length of basal membrane                     | 4.03E-03 | ANK3    | 1 |
| Cellular Compromise Small Molecule Biochemistry       | loss of lateral plasma membrane              | 4.03E-03 | ANK3    | 1 |
| Carbohydrate Metabolism                               | loss of phosphatidylinositol 4,5-diphosphate | 4.03E-03 | GFPT1   | 1 |
| Lipid Metabolism Small Molecule Biochemistry          | loss of phosphatidylinositol 4,5-diphosphate | 4.03E-03 | GFPT1   | 1 |
| Carbohydrate Metabolism                               | loss of phosphatidylinositol 4,5-diphosphate | 4.03E-03 | GFPT1   | 1 |
| Lipid Metabolism Small Molecule Biochemistry          | metabolism of D-xylulose                     | 4.03E-03 | DCXR    | 1 |
| Carbohydrate Metabolism                               | metabolism of D-xylulose                     | 4.03E-03 | DCXR    | 1 |
| Small Molecule Biochemistry                           | metabolism of D-xylulose                     | 4.03E-03 | DCXR    | 1 |
| Lipid Metabolism                                      | molar ratio of cholesterol                   | 4.03E-03 | CYP27A1 | 1 |
| Cancer                                                | molar ratio of cholesterol                   | 4.03E-03 | CYP27A1 | 1 |
| Cell Morphology                                       | morphology of liver cancer cells             | 4.03E-03 | HPN     | 1 |
| Tumor Morphology                                      | morphology of liver cancer cells             | 4.03E-03 | HPN     | 1 |
| Cell Death and Survival Organismal                    | necrosis of vascular endothelial cells       | 4.03E-03 | FGF1    | 1 |
| Development                                           | neovascularization of myocardium             | 4.03E-03 | FGF1    | 1 |
| Tissue Development                                    | neovascularization of myocardium             | 4.03E-03 | FGF1    | 1 |
| Cardiovascular System Development and Function        | neovascularization of myocardium             | 4.03E-03 | FGF1    | 1 |
| Skeletal and Muscular System Development and Function | neovascularization of myocardium             | 4.03E-03 | FGF1    | 1 |
| Cell Morphology                                       | polarization of cell surface                 | 4.03E-03 | RAB3IP  | 1 |
| Cellular Assembly and Organization                    | polarization of cell surface                 | 4.03E-03 | RAB3IP  | 1 |
| Cell-To-Cell Signaling and Interaction                | priming of adipose cell lines                | 4.03E-03 | FGF1    | 1 |
| Hematological Disease                                 | pulmonary embolism of blood vessel           | 4.03E-03 | PROC    | 1 |
| Cardiovascular Disease                                | pulmonary embolism of blood vessel           | 4.03E-03 | PROC    | 1 |
| Respiratory Disease                                   | pulmonary embolism of blood vessel           | 4.03E-03 | PROC    | 1 |

|                                                |                                                        |          |                                                                                                                                                              |    |
|------------------------------------------------|--------------------------------------------------------|----------|--------------------------------------------------------------------------------------------------------------------------------------------------------------|----|
| Developmental Disorder                         | pyrimidine 5'-nucleotidase deficiency                  | 4.03E-03 | NT5C3                                                                                                                                                        | 1  |
| Hereditary Disorder                            | pyrimidine 5'-nucleotidase deficiency                  | 4.03E-03 | NT5C3                                                                                                                                                        | 1  |
| Metabolic Disease                              | pyrimidine 5'-nucleotidase deficiency                  | 4.03E-03 | NT5C3                                                                                                                                                        | 1  |
| Hematological Disease                          | pyrimidine 5'-nucleotidase deficiency                  | 4.03E-03 | NT5C3                                                                                                                                                        | 1  |
| Infectious Disease                             | quantity of Zaire ebolavirus                           | 4.03E-03 | PROC                                                                                                                                                         | 1  |
| Small Molecule Biochemistry                    | reduction of acetoin                                   | 4.03E-03 | DCXR                                                                                                                                                         | 1  |
| Cardiovascular System Development and Function | response of aorta                                      | 4.03E-03 | ARG2 (includes EG:11847)                                                                                                                                     | 1  |
| Organismal Survival                            | survival of Macaca mulatta                             | 4.03E-03 | PROC                                                                                                                                                         | 1  |
| Hematological Disease                          | type I protein C deficiency                            | 4.03E-03 | PROC                                                                                                                                                         | 1  |
| DNA Replication, Recombination, and Repair     | unwinding of origin of replication in the short region | 4.03E-03 | DNAJB1                                                                                                                                                       | 1  |
| Cell Death and Survival                        | cell death of mammary tumor cells                      | 4.52E-03 | MAPK9,TIMP4                                                                                                                                                  | 2  |
| Tumor Morphology                               | cell death of mammary tumor cells                      | 4.52E-03 | MAPK9,TIMP4                                                                                                                                                  | 2  |
| Behavior                                       | sleep pattern                                          | 4.52E-03 | CADPS2,PER3                                                                                                                                                  | 2  |
| Cancer                                         | epithelial tumor                                       | 4.66E-03 | ADAMTS9,ALDH1A1,ANK3,ANXA4,ARG2 (includes EG:11847),CREBL2,CRYL1,EPHB6,ESRRG,FAH,FGF1,FGS,HABP2,HDAC11,HPN,JAK1,MAPK9,PDZK1IP1,RXRG,SLC27A2,ST14,TIMP4,UBE2I | 23 |
| Dermatological Diseases and Conditions         | alopecia                                               | 5.03E-03 | EPHB6,RXRG,ST14                                                                                                                                              | 3  |
| Small Molecule Biochemistry                    | synthesis of nitric oxide                              | 5.04E-03 | ARG2 (includes EG:11847),DNAJB1,JAK1,MAPK9,ST14                                                                                                              | 5  |
| Cell Signaling                                 | synthesis of nitric oxide                              | 5.04E-03 | ARG2 (includes EG:11847),DNAJB1,JAK1,MAPK9,ST14                                                                                                              | 5  |
| Cellular Movement                              | migration of breast cancer cell lines                  | 5.08E-03 | FGF1,FHOD1,GAB1,UBE2I                                                                                                                                        | 4  |
| Carbohydrate Metabolism                        | metabolism of carbohydrate                             | 5.21E-03 | AGL,ALDH1A1,ALG9,DCXR,ESRRG,GFPT1,PHKB,SLC35A1                                                                                                               | 8  |
| Small Molecule Biochemistry                    | synthesis of bile acid                                 | 5.26E-03 | CYP27A1,SLC27A2                                                                                                                                              | 2  |
| Lipid Metabolism                               | synthesis of bile acid                                 | 5.26E-03 | CYP27A1,SLC27A2                                                                                                                                              | 2  |
| Vitamin and Mineral Metabolism                 | synthesis of bile acid                                 | 5.26E-03 | CYP27A1,SLC27A2                                                                                                                                              | 2  |
| Embryonic Development                          | development of epidermis                               | 5.51E-03 | GAB1,MAPK9,ST14,TGM5                                                                                                                                         | 4  |
| Hair and Skin Development and Function         | development of epidermis                               | 5.51E-03 | GAB1,MAPK9,ST14,TGM5                                                                                                                                         | 4  |
| Organ Development                              | development of epidermis                               | 5.51E-03 | GAB1,MAPK9,ST14,TGM5                                                                                                                                         | 4  |
| Organismal Development                         | development of epidermis                               | 5.51E-03 | GAB1,MAPK9,ST14,TGM5                                                                                                                                         | 4  |
| Tissue Development                             | development of epidermis                               | 5.51E-03 | GAB1,MAPK9,ST14,TGM5                                                                                                                                         | 4  |

|                                                                     |                                               |          |                                |   |
|---------------------------------------------------------------------|-----------------------------------------------|----------|--------------------------------|---|
| Cellular Development                                                | differentiation of epithelial cells           | 5.60E-03 | ADAMTS9,FGF1,LMO4,MAPK9,ST14   | 5 |
| Cellular Development                                                | differentiation of epithelial tissue          | 5.65E-03 | FGF1,MAPK9                     | 2 |
| Tissue Development<br>Nervous System<br>Development and<br>Function | differentiation of epithelial tissue          | 5.65E-03 | FGF1,MAPK9                     | 2 |
| Tissue Morphology                                                   | quantity of Purkinje cells                    | 5.65E-03 | ANK3,CADPS2                    | 2 |
| Hair and Skin<br>Development and<br>Function                        | quantity of Purkinje cells                    | 5.65E-03 | ANK3,CADPS2                    | 2 |
| Organ Morphology                                                    | abnormal morphology of stratum<br>corneum     | 6.05E-03 | LMO4,ST14                      | 2 |
| Organ Morphology                                                    | abnormal morphology of stratum<br>corneum     | 6.05E-03 | LMO4,ST14                      | 2 |
| Organ Morphology                                                    | mass of left ventricle                        | 6.05E-03 | ARG2 (includes EG:11847),TIMP4 | 2 |
| Cardiovascular System<br>Development and<br>Function                | mass of left ventricle                        | 6.05E-03 | ARG2 (includes EG:11847),TIMP4 | 2 |
| Small Molecule<br>Biochemistry                                      | metabolism of tretinoin                       | 6.46E-03 | ALDH1A1,CYP2S1                 | 2 |
| Drug Metabolism                                                     | metabolism of tretinoin                       | 6.46E-03 | ALDH1A1,CYP2S1                 | 2 |
| Lipid Metabolism                                                    | metabolism of tretinoin                       | 6.46E-03 | ALDH1A1,CYP2S1                 | 2 |
| Vitamin and Mineral<br>Metabolism                                   | metabolism of tretinoin                       | 6.46E-03 | ALDH1A1,CYP2S1                 | 2 |
| Hair and Skin<br>Development and<br>Function                        | quantity of hair follicle                     | 6.46E-03 | MAPK9,ST14                     | 2 |
| Organ Morphology                                                    | quantity of hair follicle                     | 6.46E-03 | MAPK9,ST14                     | 2 |
| Post-Translational<br>Modification                                  | cleavage of protein fragment                  | 6.89E-03 | ST14,TMPRSS13                  | 2 |
| Protein Synthesis                                                   | cleavage of protein fragment                  | 6.89E-03 | ST14,TMPRSS13                  | 2 |
| Protein Degradation                                                 | cleavage of protein fragment                  | 6.89E-03 | ST14,TMPRSS13                  | 2 |
| Cellular Function and<br>Maintenance                                | function of cardiomyocytes                    | 7.33E-03 | ESRRG,TIMP4                    | 2 |
| Embryonic<br>Development                                            | abnormal morphology of interalveolar<br>septa | 7.79E-03 | MAPK9,PROC                     | 2 |
| Organ Development                                                   | abnormal morphology of interalveolar<br>septa | 7.79E-03 | MAPK9,PROC                     | 2 |
| Organismal<br>Development                                           | abnormal morphology of interalveolar<br>septa | 7.79E-03 | MAPK9,PROC                     | 2 |
| Tissue Development                                                  | abnormal morphology of interalveolar<br>septa | 7.79E-03 | MAPK9,PROC                     | 2 |
| Organ Morphology                                                    | abnormal morphology of interalveolar<br>septa | 7.79E-03 | MAPK9,PROC                     | 2 |
| Respiratory System<br>Development and<br>Function                   | abnormal morphology of interalveolar<br>septa | 7.79E-03 | MAPK9,PROC                     | 2 |
| Cellular Development                                                | development of oligodendrocytes               | 7.79E-03 | FGF1,HDAC11                    | 2 |
| Nervous System<br>Development and<br>Function                       | development of oligodendrocytes               | 7.79E-03 | FGF1,HDAC11                    | 2 |



|                                                |                                                               |          |                                                                                                            |    |
|------------------------------------------------|---------------------------------------------------------------|----------|------------------------------------------------------------------------------------------------------------|----|
| Gene Expression                                | expression of RNA                                             | 7.83E-03 | AEBP2,CREBL2,CYP2S1,DNAJB1,ESRRG,FGF1,FHOD1,GRHL1,JAK1,LMO4,MAPK9,PER3,PROC,RASGRF1,RXRG,TIA1,UBE2I,YEATS2 | 18 |
| Tissue Morphology                              | abnormal morphology of periocular mesenchyme                  | 8.04E-03 | ALDH1A1                                                                                                    | 1  |
| Nervous System Development and Function        | abnormal morphology of somatic motor system                   | 8.04E-03 | MAPK9                                                                                                      | 1  |
| Tissue Development                             | adhesion of cerebral endothelial cells                        | 8.04E-03 | PROC                                                                                                       | 1  |
| Cardiovascular System Development and Function | adhesion of cerebral endothelial cells                        | 8.04E-03 | PROC                                                                                                       | 1  |
| Cell-To-Cell Signaling and Interaction         | adhesion of cerebral endothelial cells                        | 8.04E-03 | PROC                                                                                                       | 1  |
| Cell Death and Survival                        | apoptosis of HAEC cells                                       | 8.04E-03 | PROC                                                                                                       | 1  |
| Cell Death and Survival                        | apoptosis of forebrain                                        | 8.04E-03 | MAPK9                                                                                                      | 1  |
| Cell Death and Survival                        | apoptosis of rhombencephalon                                  | 8.04E-03 | MAPK9                                                                                                      | 1  |
| Cell Cycle                                     | arrest in G1/S phase transition of prostate cancer cell lines | 8.04E-03 | ESRRG                                                                                                      | 1  |
| Cell Cycle                                     | arrest in mitosis of lung cancer cell lines                   | 8.04E-03 | ACRBP                                                                                                      | 1  |
| Small Molecule Biochemistry                    | biogenesis of cholesterol                                     | 8.04E-03 | FGF1                                                                                                       | 1  |
| Lipid Metabolism                               | biogenesis of cholesterol                                     | 8.04E-03 | FGF1                                                                                                       | 1  |
| Amino Acid Metabolism                          | clearance of methotrexate                                     | 8.04E-03 | FPGS                                                                                                       | 1  |
| Small Molecule Biochemistry                    | clearance of methotrexate                                     | 8.04E-03 | FPGS                                                                                                       | 1  |
| Drug Metabolism                                | clearance of methotrexate                                     | 8.04E-03 | FPGS                                                                                                       | 1  |
| Molecular Transport                            | clearance of methotrexate                                     | 8.04E-03 | FPGS                                                                                                       | 1  |
| RNA Post-Transcriptional Modification          | cleavage of hnRNA                                             | 8.04E-03 | UBE2I                                                                                                      | 1  |
| Cell Cycle                                     | cytokinesis of cardiomyocytes                                 | 8.04E-03 | FGF1                                                                                                       | 1  |
| Cellular Movement                              | cytokinesis of cardiomyocytes                                 | 8.04E-03 | FGF1                                                                                                       | 1  |
| Cellular Growth and Proliferation              | cytostasis of chondrocytes                                    | 8.04E-03 | FGF1                                                                                                       | 1  |
| Connective Tissue Development and Function     | cytostasis of chondrocytes                                    | 8.04E-03 | FGF1                                                                                                       | 1  |
| Tissue Development                             | delay in development of epithelial tissue                     | 8.04E-03 | MAPK9                                                                                                      | 1  |
| Cardiovascular System Development and Function | density of microvasculature                                   | 8.04E-03 | HABP2                                                                                                      | 1  |
| Embryonic Development                          | development of caudal vertebra                                | 8.04E-03 | ALDH1A1                                                                                                    | 1  |
| Organ Development                              | development of caudal vertebra                                | 8.04E-03 | ALDH1A1                                                                                                    | 1  |
| Organismal Development                         | development of caudal vertebra                                | 8.04E-03 | ALDH1A1                                                                                                    | 1  |

|                                                       |                                                                 |          |         |   |
|-------------------------------------------------------|-----------------------------------------------------------------|----------|---------|---|
| Tissue Development                                    | development of caudal vertebra                                  | 8.04E-03 | ALDH1A1 | 1 |
| Skeletal and Muscular System Development and Function | development of caudal vertebra                                  | 8.04E-03 | ALDH1A1 | 1 |
| Connective Tissue Development and Function            | development of caudal vertebra                                  | 8.04E-03 | ALDH1A1 | 1 |
| Embryonic Development                                 | development of extensor muscle                                  | 8.04E-03 | GAB1    | 1 |
| Organ Development                                     | development of extensor muscle                                  | 8.04E-03 | GAB1    | 1 |
| Organismal Development                                | development of extensor muscle                                  | 8.04E-03 | GAB1    | 1 |
| Tissue Development                                    | development of extensor muscle                                  | 8.04E-03 | GAB1    | 1 |
| Skeletal and Muscular System Development and Function | development of extensor muscle                                  | 8.04E-03 | GAB1    | 1 |
| Cellular Development                                  | differentiation of stratified subjunctional squamous epithelium | 8.04E-03 | MAPK9   | 1 |
| Tissue Development                                    | differentiation of stratified subjunctional squamous epithelium | 8.04E-03 | MAPK9   | 1 |
| Cell Morphology                                       | elongation of epithelial cells                                  | 8.04E-03 | FGF1    | 1 |
| Cardiovascular Disease                                | endocardial fibroelastosis                                      | 8.04E-03 | GAB1    | 1 |
| Connective Tissue Disorders                           | endocardial fibroelastosis                                      | 8.04E-03 | GAB1    | 1 |
| Small Molecule Biochemistry                           | exchange of AMP                                                 | 8.04E-03 | SLC35A1 | 1 |
| Molecular Transport                                   | exchange of AMP                                                 | 8.04E-03 | SLC35A1 | 1 |
| Nucleic Acid Metabolism                               | exchange of AMP                                                 | 8.04E-03 | SLC35A1 | 1 |
| Small Molecule Biochemistry                           | exchange of CMP-sialic acid                                     | 8.04E-03 | SLC35A1 | 1 |
| Molecular Transport                                   | exchange of CMP-sialic acid                                     | 8.04E-03 | SLC35A1 | 1 |
| Carbohydrate Metabolism                               | exchange of CMP-sialic acid                                     | 8.04E-03 | SLC35A1 | 1 |
| Nucleic Acid Metabolism                               | exchange of CMP-sialic acid                                     | 8.04E-03 | SLC35A1 | 1 |
| Small Molecule Biochemistry                           | exchange of UDP-N-acetyl-D-galactosamine                        | 8.04E-03 | SLC35A1 | 1 |
| Carbohydrate Metabolism                               | exchange of UDP-N-acetyl-D-galactosamine                        | 8.04E-03 | SLC35A1 | 1 |
| Nucleic Acid Metabolism                               | exchange of UDP-N-acetyl-D-galactosamine                        | 8.04E-03 | SLC35A1 | 1 |
| Small Molecule Biochemistry                           | exchange of UDP-galactose                                       | 8.04E-03 | SLC35A1 | 1 |
| Molecular Transport                                   | exchange of UDP-galactose                                       | 8.04E-03 | SLC35A1 | 1 |
| Carbohydrate Metabolism                               | exchange of UDP-galactose                                       | 8.04E-03 | SLC35A1 | 1 |
| Nucleic Acid Metabolism                               | exchange of UDP-galactose                                       | 8.04E-03 | SLC35A1 | 1 |
| Small Molecule Biochemistry                           | exchange of UDP-galactose                                       | 8.04E-03 | SLC35A1 | 1 |
| Molecular Transport                                   | exchange of UDP-galactose                                       | 8.04E-03 | SLC35A1 | 1 |
| Carbohydrate Metabolism                               | exchange of UDP-galactose                                       | 8.04E-03 | SLC35A1 | 1 |
| Nucleic Acid Metabolism                               | exchange of UDP-galactose                                       | 8.04E-03 | SLC35A1 | 1 |

|                        |                                          |          |         |   |
|------------------------|------------------------------------------|----------|---------|---|
| Small Molecule         |                                          |          |         |   |
| Biochemistry           | exchange of UMP                          | 8.04E-03 | SLC35A1 | 1 |
| Molecular Transport    | exchange of UMP                          | 8.04E-03 | SLC35A1 | 1 |
| Nucleic Acid           |                                          |          |         |   |
| Metabolism             | exchange of UMP                          | 8.04E-03 | SLC35A1 | 1 |
| Developmental          |                                          |          |         |   |
| Disorder               | exencephaly of rhombencephalon           | 8.04E-03 | MAPK9   | 1 |
| Connective Tissue      |                                          |          |         |   |
| Disorders              | exencephaly of rhombencephalon           | 8.04E-03 | MAPK9   | 1 |
| Neurological Disease   | exencephaly of rhombencephalon           | 8.04E-03 | MAPK9   | 1 |
| Skeletal and Muscular  |                                          |          |         |   |
| Disorders              | exencephaly of rhombencephalon           | 8.04E-03 | MAPK9   | 1 |
| Inflammatory           | inflammation of exocrine region of       |          |         |   |
| Response               | pancreas                                 | 8.04E-03 | PROC    | 1 |
| Embryonic              |                                          |          |         |   |
| Development            | invasion of perioptic mesenchyme         | 8.04E-03 | ALDH1A1 | 1 |
| Cancer                 | invasion of perioptic mesenchyme         | 8.04E-03 | ALDH1A1 | 1 |
| Organismal Injury and  |                                          |          |         |   |
| Abnormalities          | lesioning of para-aortic lymph nodes     | 8.04E-03 | HPN     | 1 |
| Immunological          |                                          |          |         |   |
| Disease                | lesioning of para-aortic lymph nodes     | 8.04E-03 | HPN     | 1 |
| Cell Morphology        | mineralization of muscle cell lines      | 8.04E-03 | ESRRG   | 1 |
| Cell Cycle             | mitogenesis of bladder cancer cell lines | 8.04E-03 | FGF1    | 1 |
| Cellular Development   | morphogenesis of exocrine cells          | 8.04E-03 | FGF1    | 1 |
| Organismal             |                                          |          |         |   |
| Development            | morphogenesis of exocrine cells          | 8.04E-03 | FGF1    | 1 |
| Tissue Development     | morphogenesis of exocrine cells          | 8.04E-03 | FGF1    | 1 |
| Cell Morphology        | morphogenesis of exocrine cells          | 8.04E-03 | FGF1    | 1 |
| Small Molecule         |                                          |          |         |   |
| Biochemistry           | oxidation of acetaldehyde                | 8.04E-03 | ALDH1A1 | 1 |
| Energy Production      | oxidation of acetaldehyde                | 8.04E-03 | ALDH1A1 | 1 |
| Embryonic              |                                          |          |         |   |
| Development            | patterning of rhombencephalon            | 8.04E-03 | ALDH1A1 | 1 |
| Organ Development      | patterning of rhombencephalon            | 8.04E-03 | ALDH1A1 | 1 |
| Nervous System         |                                          |          |         |   |
| Development and        |                                          |          |         |   |
| Function               | patterning of rhombencephalon            | 8.04E-03 | ALDH1A1 | 1 |
| RNA Post-              |                                          |          |         |   |
| Transcriptional        |                                          |          |         |   |
| Modification           | polyadenylation of hnRNA                 | 8.04E-03 | UBE2I   | 1 |
| Cell-To-Cell Signaling |                                          |          |         |   |
| and Interaction        | priming of adipoblasts                   | 8.04E-03 | FGF1    | 1 |
| Connective Tissue      |                                          |          |         |   |
| Development and        |                                          |          |         |   |
| Function               | priming of adipoblasts                   | 8.04E-03 | FGF1    | 1 |
| Small Molecule         |                                          |          |         |   |
| Biochemistry           | quantity of UDP-N-acetylglucosamine      | 8.04E-03 | GFPT1   | 1 |
| Molecular Transport    | quantity of UDP-N-acetylglucosamine      | 8.04E-03 | GFPT1   | 1 |
| Carbohydrate           |                                          |          |         |   |
| Metabolism             | quantity of UDP-N-acetylglucosamine      | 8.04E-03 | GFPT1   | 1 |

|                                                      |                                           |          |                           |   |
|------------------------------------------------------|-------------------------------------------|----------|---------------------------|---|
| Nucleic Acid<br>Metabolism                           | quantity of UDP-N-acetylglucosamine       | 8.04E-03 | GFPT1                     | 1 |
| Organismal<br>Development                            | quantity of lymphatic fluid               | 8.04E-03 | PROC                      | 1 |
| Lymphoid Tissue<br>Structure and<br>Development      | quantity of lymphatic fluid               | 8.04E-03 | PROC                      | 1 |
| Cellular Assembly and<br>Organization                | release of dense-core vesicles            | 8.04E-03 | CADPS2                    | 1 |
| Cellular Function and<br>Maintenance                 | release of dense-core vesicles            | 8.04E-03 | CADPS2                    | 1 |
| Cellular Assembly and<br>Organization                | remodeling of actin stress fibers         | 8.04E-03 | RAB3IP                    | 1 |
| Cell-To-Cell Signaling<br>and Interaction            | response of fibrosarcoma cell lines       | 8.04E-03 | JAK1                      | 1 |
| Cardiovascular System<br>Development and<br>Function | survival of lymphatic endothelial cells   | 8.04E-03 | FGF1                      | 1 |
| Cell Death and Survival                              | survival of lymphatic endothelial cells   | 8.04E-03 | FGF1                      | 1 |
| Small Molecule<br>Biochemistry                       | toxicity of retinol                       | 8.04E-03 | ALDH1A1                   | 1 |
| Lipid Metabolism                                     | toxicity of retinol                       | 8.04E-03 | ALDH1A1                   | 1 |
| Vitamin and Mineral<br>Metabolism                    | toxicity of retinol                       | 8.04E-03 | ALDH1A1                   | 1 |
| Small Molecule<br>Biochemistry                       | transport of CMP-sialic acid              | 8.04E-03 | SLC35A1                   | 1 |
| Molecular Transport                                  | transport of CMP-sialic acid              | 8.04E-03 | SLC35A1                   | 1 |
| Carbohydrate<br>Metabolism                           | transport of CMP-sialic acid              | 8.04E-03 | SLC35A1                   | 1 |
| Nucleic Acid<br>Metabolism                           | transport of CMP-sialic acid              | 8.04E-03 | SLC35A1                   | 1 |
| Small Molecule<br>Biochemistry                       | transport of UMP                          | 8.04E-03 | SLC35A1                   | 1 |
| Molecular Transport                                  | transport of UMP                          | 8.04E-03 | SLC35A1                   | 1 |
| Nucleic Acid<br>Metabolism                           | transport of UMP                          | 8.04E-03 | SLC35A1                   | 1 |
| Developmental<br>Disorder                            | type I tyrosinemia                        | 8.04E-03 | FAH                       | 1 |
| Hereditary Disorder                                  | type I tyrosinemia                        | 8.04E-03 | FAH                       | 1 |
| Metabolic Disease                                    | type I tyrosinemia                        | 8.04E-03 | FAH                       | 1 |
| Gastrointestinal<br>Disease                          | type I tyrosinemia                        | 8.04E-03 | FAH                       | 1 |
| Hepatic System<br>Disease                            | type I tyrosinemia                        | 8.04E-03 | FAH                       | 1 |
| Cancer                                               | vascularization of papilloma              | 8.04E-03 | MAPK9                     | 1 |
| Cardiovascular System<br>Development and<br>Function | vascularization of papilloma              | 8.04E-03 | MAPK9                     | 1 |
| Tumor Morphology                                     | vascularization of papilloma              | 8.04E-03 | MAPK9                     | 1 |
| Cell Death and Survival                              | cell death of pheochromocytoma cell lines | 8.06E-03 | DNAJB1,GAB1,MAPK9         | 3 |
| Post-Translational<br>Modification                   | hydrolysis of protein                     | 8.16E-03 | ADAMTS9,HPN,ST14,TMPRSS13 | 4 |

|                                                       |                                             |          |                                                                               |    |
|-------------------------------------------------------|---------------------------------------------|----------|-------------------------------------------------------------------------------|----|
| Protein Synthesis                                     | hydrolysis of protein                       | 8.16E-03 | ADAMTS9,HPN,ST14,TMPRSS13                                                     | 4  |
| Protein Degradation                                   | hydrolysis of protein                       | 8.16E-03 | ADAMTS9,HPN,ST14,TMPRSS13                                                     | 4  |
| Cell Death and Survival                               | apoptosis of glomerular cells               | 8.25E-03 | GFPT1,PROC                                                                    | 2  |
| Cellular Development                                  | proliferation of tumor cell lines           | 8.88E-03 | ACRBP,ALDH1A1,EPHB6,ESRRG,FGF1,GAB1,HPN,JAK1,MAPK9,NT5C3,PDZK1IP1,TIMP4,UBE2I | 13 |
| Cellular Growth and Proliferation                     | proliferation of tumor cell lines           | 8.88E-03 | ACRBP,ALDH1A1,EPHB6,ESRRG,FGF1,GAB1,HPN,JAK1,MAPK9,NT5C3,PDZK1IP1,TIMP4,UBE2I | 13 |
| Embryonic Development                                 | death of embryo                             | 9.22E-03 | DNAJB1,MAPK9                                                                  | 2  |
| Organismal Survival                                   | death of embryo                             | 9.22E-03 | DNAJB1,MAPK9                                                                  | 2  |
| Carbohydrate Metabolism                               | metabolism of glycogen                      | 9.22E-03 | AGL,PHKB                                                                      | 2  |
| Gene Expression                                       | binding of DNA                              | 9.82E-03 | DNAJB1,FGF1,GFPT1,IP6K2,JAK1,MAPK9,PROC                                       | 7  |
| Developmental Disorder                                | spina bifida                                | 1.02E-02 | ALDH1A1,LMO4                                                                  | 2  |
| Connective Tissue Disorders                           | spina bifida                                | 1.02E-02 | ALDH1A1,LMO4                                                                  | 2  |
| Neurological Disease                                  | spina bifida                                | 1.02E-02 | ALDH1A1,LMO4                                                                  | 2  |
| Skeletal and Muscular Disorders                       | spina bifida                                | 1.02E-02 | ALDH1A1,LMO4                                                                  | 2  |
| Carbohydrate Metabolism                               | metabolism of polysaccharide                | 1.08E-02 | AGL,ALG9,GFPT1,PHKB                                                           | 4  |
| Embryonic Development                                 | development of vertebrae                    | 1.18E-02 | ALDH1A1,LMO4                                                                  | 2  |
| Organ Development                                     | development of vertebrae                    | 1.18E-02 | ALDH1A1,LMO4                                                                  | 2  |
| Organismal Development                                | development of vertebrae                    | 1.18E-02 | ALDH1A1,LMO4                                                                  | 2  |
| Tissue Development                                    | development of vertebrae                    | 1.18E-02 | ALDH1A1,LMO4                                                                  | 2  |
| Skeletal and Muscular System Development and Function | development of vertebrae                    | 1.18E-02 | ALDH1A1,LMO4                                                                  | 2  |
| Connective Tissue Development and Function            | development of vertebrae                    | 1.18E-02 | ALDH1A1,LMO4                                                                  | 2  |
| Ophthalmic Disease                                    | eyelids open at birth                       | 1.18E-02 | LMO4,MAPK9                                                                    | 2  |
| Hereditary Disorder                                   | Liddle syndrome                             | 1.20E-02 | SCNN1G                                                                        | 1  |
| Metabolic Disease                                     | Liddle syndrome                             | 1.20E-02 | SCNN1G                                                                        | 1  |
| Cardiovascular Disease                                | Liddle syndrome                             | 1.20E-02 | SCNN1G                                                                        | 1  |
| Renal and Urological Disease                          | Liddle syndrome                             | 1.20E-02 | SCNN1G                                                                        | 1  |
| Nervous System Development and Function               | afterhyperpolarization of pyramidal neurons | 1.20E-02 | LMO4                                                                          | 1  |
| Cell-To-Cell Signaling and Interaction                | afterhyperpolarization of pyramidal neurons | 1.20E-02 | LMO4                                                                          | 1  |
| Cancer                                                | aneuploidy of tumor cells                   | 1.20E-02 | MAPK9                                                                         | 1  |
| Cell Cycle                                            | aneuploidy of tumor cells                   | 1.20E-02 | MAPK9                                                                         | 1  |
| Cell Cycle                                            | arrest in mitosis of carcinoma cell lines   | 1.20E-02 | ACRBP                                                                         | 1  |

|                                              |                                                       |          |                          |   |
|----------------------------------------------|-------------------------------------------------------|----------|--------------------------|---|
| Hereditary Disorder                          | autosomal recessive<br>pseudohypoaldosteronism type I | 1.20E-02 | SCNN1G                   | 1 |
| Metabolic Disease                            | autosomal recessive<br>pseudohypoaldosteronism type I | 1.20E-02 | SCNN1G                   | 1 |
| Renal and Urological Disease                 | autosomal recessive<br>pseudohypoaldosteronism type I | 1.20E-02 | SCNN1G                   | 1 |
| Small Molecule Biochemistry                  | biosynthesis of putrescine                            | 1.20E-02 | ARG2 (includes EG:11847) | 1 |
| Reproductive System Development and Function | birth                                                 | 1.20E-02 | JAK1                     | 1 |
| Organismal Injury and Abnormalities          | bleeding of spinal cord                               | 1.20E-02 | PROC                     | 1 |
| Neurological Disease                         | bleeding of spinal cord                               | 1.20E-02 | PROC                     | 1 |
| Amino Acid Metabolism                        | clearance of L-glutamic acid                          | 1.20E-02 | FPGS                     | 1 |
| Small Molecule Biochemistry                  | clearance of L-glutamic acid                          | 1.20E-02 | FPGS                     | 1 |
| Small Molecule Biochemistry                  | clearance of retinaldehyde                            | 1.20E-02 | ALDH1A1                  | 1 |
| Molecular Transport                          | clearance of retinaldehyde                            | 1.20E-02 | ALDH1A1                  | 1 |
| Lipid Metabolism                             | clearance of retinaldehyde                            | 1.20E-02 | ALDH1A1                  | 1 |
| Vitamin and Mineral Metabolism               | clearance of retinaldehyde                            | 1.20E-02 | ALDH1A1                  | 1 |
| Small Molecule Biochemistry                  | clearance of retinol                                  | 1.20E-02 | ALDH1A1                  | 1 |
| Molecular Transport                          | clearance of retinol                                  | 1.20E-02 | ALDH1A1                  | 1 |
| Lipid Metabolism                             | clearance of retinol                                  | 1.20E-02 | ALDH1A1                  | 1 |
| Vitamin and Mineral Metabolism               | clearance of retinol                                  | 1.20E-02 | ALDH1A1                  | 1 |
| Cancer                                       | cortisol-producing adrenal cortical adenoma           | 1.20E-02 | UBE2I                    | 1 |
| Cell-To-Cell Signaling and Interaction       | degradation of synapse                                | 1.20E-02 | JAK1                     | 1 |
| Embryonic Development                        | development of corneal stroma                         | 1.20E-02 | ALDH1A1                  | 1 |
| Organ Development                            | development of corneal stroma                         | 1.20E-02 | ALDH1A1                  | 1 |
| Organismal Development                       | development of corneal stroma                         | 1.20E-02 | ALDH1A1                  | 1 |
| Tissue Development                           | development of corneal stroma                         | 1.20E-02 | ALDH1A1                  | 1 |
| Visual System Development and Function       | development of corneal stroma                         | 1.20E-02 | ALDH1A1                  | 1 |
| Embryonic Development                        | development of presphenoid bone                       | 1.20E-02 | LMO4                     | 1 |
| Organismal Development                       | development of presphenoid bone                       | 1.20E-02 | LMO4                     | 1 |
| Tissue Development                           | development of presphenoid bone                       | 1.20E-02 | LMO4                     | 1 |
| Embryonic Development                        | development of sacral vertebra                        | 1.20E-02 | ALDH1A1                  | 1 |

|                                                       |                                           |          |          |   |
|-------------------------------------------------------|-------------------------------------------|----------|----------|---|
| Organ Development                                     | development of sacral vertebra            | 1.20E-02 | ALDH1A1  | 1 |
| Organismal Development                                | development of sacral vertebra            | 1.20E-02 | ALDH1A1  | 1 |
| Tissue Development                                    | development of sacral vertebra            | 1.20E-02 | ALDH1A1  | 1 |
| Skeletal and Muscular System Development and Function | development of sacral vertebra            | 1.20E-02 | ALDH1A1  | 1 |
| Connective Tissue Development and Function            | development of sacral vertebra            | 1.20E-02 | ALDH1A1  | 1 |
| Cellular Development                                  | differentiation of ectodermal cells       | 1.20E-02 | MAPK9    | 1 |
| Embryonic Development                                 | differentiation of ectodermal cells       | 1.20E-02 | MAPK9    | 1 |
| Tissue Development                                    | dissociation of bladder cancer cell lines | 1.20E-02 | FGF1     | 1 |
| Cell-To-Cell Signaling and Interaction                | dissociation of bladder cancer cell lines | 1.20E-02 | FGF1     | 1 |
| Cell Morphology                                       | elongation of breast cancer cell lines    | 1.20E-02 | FHOD1    | 1 |
| Respiratory Disease                                   | failure of respiratory system             | 1.20E-02 | SCNN1G   | 1 |
| Behavior                                              | falling of mice                           | 1.20E-02 | RXRG     | 1 |
| Post-Translational Modification                       | hydrolysis of protein fragment            | 1.20E-02 | TMPRSS13 | 1 |
| Protein Synthesis                                     | hydrolysis of protein fragment            | 1.20E-02 | TMPRSS13 | 1 |
| Protein Degradation                                   | hydrolysis of protein fragment            | 1.20E-02 | TMPRSS13 | 1 |
| Inflammatory Response                                 | inflammation of urinary bladder           | 1.20E-02 | GSTK1    | 1 |
| Cell Cycle                                            | initiation of S phase of fibroblasts      | 1.20E-02 | GAB1     | 1 |
| Connective Tissue Development and Function            | initiation of S phase of fibroblasts      | 1.20E-02 | GAB1     | 1 |
| Organismal Development                                | mass of thyroid gland                     | 1.20E-02 | FGF1     | 1 |
| Endocrine System Development and Function             | mass of thyroid gland                     | 1.20E-02 | FGF1     | 1 |
| Organ Morphology                                      | mass of thyroid gland                     | 1.20E-02 | FGF1     | 1 |
| Neurological Disease                                  | optokinetic nystagmus                     | 1.20E-02 | CADPS2   | 1 |
| Ophthalmic Disease                                    | optokinetic nystagmus                     | 1.20E-02 | CADPS2   | 1 |
| Cellular Development                                  | proliferation of adipose cell lines       | 1.20E-02 | FGF1     | 1 |
| Cellular Growth and Proliferation                     | proliferation of adipose cell lines       | 1.20E-02 | FGF1     | 1 |
| Connective Tissue Development and Function            | proliferation of adipose cell lines       | 1.20E-02 | FGF1     | 1 |
| Cardiovascular System Development and Function        | quantity of blood vessel tissue           | 1.20E-02 | PROC     | 1 |
| Tissue Morphology                                     | quantity of blood vessel tissue           | 1.20E-02 | PROC     | 1 |

|                                           |                                                  |          |                                                                                                                                                 |    |
|-------------------------------------------|--------------------------------------------------|----------|-------------------------------------------------------------------------------------------------------------------------------------------------|----|
| Cellular Assembly and Organization        | quantity of dense-core vesicles                  | 1.20E-02 | CADPS2                                                                                                                                          | 1  |
| Dermatological Diseases and Conditions    | skin manifestation                               | 1.20E-02 | RXRG                                                                                                                                            | 1  |
| Small Molecule Biochemistry               | synthesis of spermine                            | 1.20E-02 | ARG2 (includes EG:11847)                                                                                                                        | 1  |
| Cancer                                    | transformation of cervical vertebra              | 1.20E-02 | ALDH1A1                                                                                                                                         | 1  |
| Tissue Morphology                         | transformation of cervical vertebra              | 1.20E-02 | ALDH1A1                                                                                                                                         | 1  |
| Skeletal and Muscular Disorders           | transformation of cervical vertebra              | 1.20E-02 | ALDH1A1<br>ABO,ALDH1A1,ARG2 (includes EG:11847),CREBL2,DNAJB1,EPHB6,FAH,FGF1,GAB1,GFPT1,HDAC11,HEBP2,HPN,IP6K2,JAK1,MAPK9,PRO C,ST14,TIA1,TIMP4 | 1  |
| Cell Death and Survival                   | apoptosis                                        | 1.23E-02 |                                                                                                                                                 | 20 |
| Hematological Disease                     | thrombosis of blood vessel                       | 1.36E-02 | ABO,PROC                                                                                                                                        | 2  |
| Cardiovascular Disease                    | thrombosis of blood vessel                       | 1.36E-02 | ABO,PROC                                                                                                                                        | 2  |
| Embryonic Development                     | abnormal morphology of lens                      | 1.48E-02 | ALDH1A1,MAPK9                                                                                                                                   | 2  |
| Organ Development                         | abnormal morphology of lens                      | 1.48E-02 | ALDH1A1,MAPK9                                                                                                                                   | 2  |
| Organismal Development                    | abnormal morphology of lens                      | 1.48E-02 | ALDH1A1,MAPK9                                                                                                                                   | 2  |
| Tissue Development                        | abnormal morphology of lens                      | 1.48E-02 | ALDH1A1,MAPK9                                                                                                                                   | 2  |
| Organ Morphology                          | abnormal morphology of lens                      | 1.48E-02 | ALDH1A1,MAPK9                                                                                                                                   | 2  |
| Visual System Development and Function    | abnormal morphology of lens                      | 1.48E-02 | ALDH1A1,MAPK9                                                                                                                                   | 2  |
| Cell Morphology                           | formation of lamellipodia                        | 1.49E-02 | FGF1,GAB1,PROC                                                                                                                                  | 3  |
| Cellular Assembly and Organization        | formation of lamellipodia                        | 1.49E-02 | FGF1,GAB1,PROC                                                                                                                                  | 3  |
| Cellular Function and Maintenance         | formation of lamellipodia                        | 1.49E-02 | FGF1,GAB1,PROC                                                                                                                                  | 3  |
|                                           | abnormal morphology of embryonic neuroepithelium | 1.54E-02 | LMO4,MAPK9                                                                                                                                      | 2  |
| Tissue Morphology                         | neuroepithelium                                  | 1.54E-02 | LMO4,MAPK9                                                                                                                                      | 2  |
| Cell Morphology                           | elongation of cells                              | 1.54E-02 | FGF1,FHOD1                                                                                                                                      | 2  |
| Protein Synthesis                         | degradation of protein                           | 1.58E-02 | ADAMTS9,HPN,JAK1,ST14,TMPRSS13,UBE2I                                                                                                            | 6  |
| Protein Degradation                       | degradation of protein                           | 1.58E-02 | ADAMTS9,HPN,JAK1,ST14,TMPRSS13,UBE2I                                                                                                            | 6  |
| Post-Translational Modification           | JUN phosphorylation                              | 1.60E-02 | MAPK9                                                                                                                                           | 1  |
| Cell Signaling                            | JUN phosphorylation                              | 1.60E-02 | MAPK9                                                                                                                                           | 1  |
| Organismal Development                    | abnormal morphology of fungiform papillae        | 1.60E-02 | MAPK9                                                                                                                                           | 1  |
|                                           | abnormal morphology of fungiform papillae        | 1.60E-02 | MAPK9                                                                                                                                           | 1  |
| Organ Morphology                          | papillae                                         | 1.60E-02 | MAPK9                                                                                                                                           | 1  |
| Digestive System Development and Function | abnormal morphology of fungiform papillae        | 1.60E-02 | MAPK9                                                                                                                                           | 1  |
| Tissue Development                        | adhesion of beta islet cells                     | 1.60E-02 | FGF1                                                                                                                                            | 1  |
| Endocrine System Development and Function | adhesion of beta islet cells                     | 1.60E-02 | FGF1                                                                                                                                            | 1  |



|                                                |                                          |          |         |   |
|------------------------------------------------|------------------------------------------|----------|---------|---|
| Cell-To-Cell Signaling and Interaction         | adhesion of beta islet cells             | 1.60E-02 | FGF1    | 1 |
| Embryonic Development                          | angiogenesis of islets of Langerhans     | 1.60E-02 | FGF1    | 1 |
| Organ Development                              | angiogenesis of islets of Langerhans     | 1.60E-02 | FGF1    | 1 |
| Organismal Development                         | angiogenesis of islets of Langerhans     | 1.60E-02 | FGF1    | 1 |
| Tissue Development                             | angiogenesis of islets of Langerhans     | 1.60E-02 | FGF1    | 1 |
| Endocrine System Development and Function      | angiogenesis of islets of Langerhans     | 1.60E-02 | FGF1    | 1 |
| Cardiovascular System Development and Function | angiogenesis of islets of Langerhans     | 1.60E-02 | FGF1    | 1 |
| Digestive System Development and Function      | angiogenesis of islets of Langerhans     | 1.60E-02 | FGF1    | 1 |
| Cellular Development                           | branching of breast cell lines           | 1.60E-02 | GAB1    | 1 |
| Reproductive System Development and Function   | branching of breast cell lines           | 1.60E-02 | GAB1    | 1 |
| Embryonic Development                          | closure of optic fissure                 | 1.60E-02 | MAPK9   | 1 |
| Organismal Development                         | closure of optic fissure                 | 1.60E-02 | MAPK9   | 1 |
| Tissue Development                             | closure of optic fissure                 | 1.60E-02 | MAPK9   | 1 |
| Tissue Morphology                              | closure of optic fissure                 | 1.60E-02 | MAPK9   | 1 |
| Small Molecule Biochemistry                    | concentration of retinaldehyde           | 1.60E-02 | ALDH1A1 | 1 |
| Molecular Transport                            | concentration of retinaldehyde           | 1.60E-02 | ALDH1A1 | 1 |
| Lipid Metabolism                               | concentration of retinaldehyde           | 1.60E-02 | ALDH1A1 | 1 |
| Vitamin and Mineral Metabolism                 | concentration of retinaldehyde           | 1.60E-02 | ALDH1A1 | 1 |
| Cell Cycle                                     | conformational modification of chromatin | 1.60E-02 | HDAC11  | 1 |
| DNA Replication, Recombination, and Repair     | conformational modification of chromatin | 1.60E-02 | HDAC11  | 1 |
| Cellular Growth and Proliferation              | cytostasis of kidney cancer cell lines   | 1.60E-02 | TIMP4   | 1 |
| Embryonic Development                          | development of cervical vertebra         | 1.60E-02 | LMO4    | 1 |
| Organ Development                              | development of cervical vertebra         | 1.60E-02 | LMO4    | 1 |
| Organismal Development                         | development of cervical vertebra         | 1.60E-02 | LMO4    | 1 |
| Tissue Development                             | development of cervical vertebra         | 1.60E-02 | LMO4    | 1 |

|                                                                |                                             |          |                          |   |
|----------------------------------------------------------------|---------------------------------------------|----------|--------------------------|---|
| Skeletal and Muscular System Development and Function          | development of cervical vertebra            | 1.60E-02 | LMO4                     | 1 |
| Connective Tissue Development and Function                     | development of cervical vertebra            | 1.60E-02 | LMO4                     | 1 |
| Cellular Development Endocrine System Development and Function | differentiation of lactotropes              | 1.60E-02 | FGF1                     | 1 |
|                                                                | differentiation of lactotropes              | 1.60E-02 | FGF1                     | 1 |
| Cellular Development                                           | differentiation of mammary epithelial cells | 1.60E-02 | LMO4                     | 1 |
| Reproductive System Development and Function                   | differentiation of mammary epithelial cells | 1.60E-02 | LMO4                     | 1 |
| Cancer                                                         | growth of papilloma                         | 1.60E-02 | MAPK9                    | 1 |
| Cellular Compromise Organismal Injury and Abnormalities        | injury of podocytes                         | 1.60E-02 | PROC                     | 1 |
| Renal and Urological Disease                                   | injury of podocytes                         | 1.60E-02 | PROC                     | 1 |
| Cell Death and Survival Embryonic Development                  | necrosis of islets of Langerhans            | 1.60E-02 | PROC                     | 1 |
| Cellular Growth and Proliferation                              | pluripotency of embryonic stem cells        | 1.60E-02 | JAK1                     | 1 |
| Small Molecule Biochemistry                                    | quantity of oleic acid                      | 1.60E-02 | CYP27A1                  | 1 |
| Molecular Transport                                            | quantity of oleic acid                      | 1.60E-02 | CYP27A1                  | 1 |
| Lipid Metabolism                                               | quantity of oleic acid                      | 1.60E-02 | CYP27A1                  | 1 |
| Tissue Development                                             | regeneration of endothelial tissue          | 1.60E-02 | FGF1                     | 1 |
| Cardiovascular System Development and Function                 | regeneration of endothelial tissue          | 1.60E-02 | FGF1                     | 1 |
| Tissue Morphology                                              | regeneration of endothelial tissue          | 1.60E-02 | FGF1                     | 1 |
| Small Molecule Biochemistry                                    | synthesis of spermidine                     | 1.60E-02 | ARG2 (includes EG:11847) | 1 |
| Cardiovascular System Development and Function                 | thickness of carotid artery                 | 1.60E-02 | FGF1                     | 1 |
| Tissue Morphology                                              | thickness of carotid artery                 | 1.60E-02 | FGF1                     | 1 |
| Small Molecule Biochemistry                                    | tolerance of D-glucose                      | 1.60E-02 | GAB1                     | 1 |
| Carbohydrate Metabolism                                        | tolerance of D-glucose                      | 1.60E-02 | GAB1                     | 1 |
| Small Molecule Biochemistry                                    | turnover of norepinephrine                  | 1.60E-02 | ARG2 (includes EG:11847) | 1 |
| Drug Metabolism                                                | turnover of norepinephrine                  | 1.60E-02 | ARG2 (includes EG:11847) | 1 |

|                                                       |                                              |          |                                                                                                |    |
|-------------------------------------------------------|----------------------------------------------|----------|------------------------------------------------------------------------------------------------|----|
| Cell-To-Cell Signaling and Interaction                | turnover of norepinephrine                   | 1.60E-02 | ARG2 (includes EG:11847)                                                                       | 1  |
| Nervous System Development and Function               | volume of brain tissue                       | 1.60E-02 | PROC                                                                                           | 1  |
| Tissue Morphology                                     | volume of brain tissue                       | 1.60E-02 | PROC                                                                                           | 1  |
| Cell Morphology                                       | whole-cell conductance of oocytes            | 1.60E-02 | SCNN1G                                                                                         | 1  |
| Reproductive System Development and Function          | whole-cell conductance of oocytes            | 1.60E-02 | SCNN1G                                                                                         | 1  |
| Gene Expression                                       | transcription                                | 1.60E-02 | AEBP2,CREBL2,CYP2S1,ESRRG,FGF1,FHOD1,FPGS,GRHL1,JAK1,LMO4,MAPK9,PER3,RASGRF1,RXRG,UBE2I,YEATS2 | 16 |
| Cellular Development                                  | proliferation of prostate cancer cell lines  | 1.61E-02 | ALDH1A1,ESRRG,FGF1,HPN                                                                         | 4  |
| Cellular Growth and Proliferation                     | proliferation of prostate cancer cell lines  | 1.61E-02 | ALDH1A1,ESRRG,FGF1,HPN                                                                         | 4  |
| Respiratory Disease                                   | dyspnea                                      | 1.62E-02 | ALDH1A1,MAPK9,PROC                                                                             | 3  |
| Cellular Movement                                     | migration of muscle cells                    | 1.65E-02 | GAB1,HABP2,PROC                                                                                | 3  |
| Skeletal and Muscular System Development and Function | migration of muscle cells                    | 1.65E-02 | GAB1,HABP2,PROC                                                                                | 3  |
| Cellular Development                                  | proliferation of muscle cell lines           | 1.86E-02 | FGF1,JAK1                                                                                      | 2  |
| Cellular Growth and Proliferation                     | proliferation of muscle cell lines           | 1.86E-02 | FGF1,JAK1                                                                                      | 2  |
| Skeletal and Muscular System Development and Function | proliferation of muscle cell lines           | 1.86E-02 | FGF1,JAK1                                                                                      | 2  |
| Cancer                                                | transformation of fibroblast cell lines      | 1.87E-02 | FGF1,GAB1,MAPK9,RASGRF1                                                                        | 4  |
| Cell-To-Cell Signaling and Interaction                | activation of central nervous system cells   | 1.93E-02 | ANK3,FGF1                                                                                      | 2  |
| Organismal Injury and Abnormalities                   | injury of brain                              | 1.93E-02 | PROC,RASGRF1                                                                                   | 2  |
| Neurological Disease                                  | injury of brain                              | 1.93E-02 | PROC,RASGRF1                                                                                   | 2  |
| Small Molecule Biochemistry                           | alpha-oxidation of fatty acid                | 2.00E-02 | SLC27A2                                                                                        | 1  |
| Lipid Metabolism                                      | alpha-oxidation of fatty acid                | 2.00E-02 | SLC27A2                                                                                        | 1  |
| Energy Production                                     | alpha-oxidation of fatty acid                | 2.00E-02 | SLC27A2                                                                                        | 1  |
| Small Molecule Biochemistry                           | beta-oxidation of very long chain fatty acid | 2.00E-02 | SLC27A2                                                                                        | 1  |
| Lipid Metabolism                                      | beta-oxidation of very long chain fatty acid | 2.00E-02 | SLC27A2                                                                                        | 1  |
| Energy Production                                     | beta-oxidation of very long chain fatty acid | 2.00E-02 | SLC27A2                                                                                        | 1  |
| Cell Cycle                                            | cell cycle progression of oocytes            | 2.00E-02 | GAB1                                                                                           | 1  |
| Reproductive System Development and Function          | cell cycle progression of oocytes            | 2.00E-02 | GAB1                                                                                           | 1  |

|                                                                          |                                                             |          |                          |   |
|--------------------------------------------------------------------------|-------------------------------------------------------------|----------|--------------------------|---|
| Cell Death and Survival<br>Nervous System<br>Development and<br>Function | cell death of facial motor neurons                          | 2.00E-02 | MAPK9                    | 1 |
| Visual System<br>Development and<br>Function                             | closure of eyelid                                           | 2.00E-02 | MAPK9                    | 1 |
| Cardiovascular System<br>Development and<br>Function                     | closure of eyelid                                           | 2.00E-02 | MAPK9                    | 1 |
| Cardiovascular System<br>Development and<br>Function                     | contractility of artery                                     | 2.00E-02 | EPHB6                    | 1 |
| Dermatological<br>Diseases and<br>Conditions                             | delayed hypersensitive reaction of skin                     | 2.00E-02 | EPHB6                    | 1 |
| Immunological<br>Disease                                                 | delayed hypersensitive reaction of skin                     | 2.00E-02 | EPHB6                    | 1 |
| Cellular Compromise<br>Small Molecule<br>Biochemistry                    | fragmentation of spindle pole                               | 2.00E-02 | ACRBP                    | 1 |
| Lipid Metabolism                                                         | hydroxylation of cholesterol                                | 2.00E-02 | CYP27A1                  | 1 |
|                                                                          | hydroxylation of cholesterol                                | 2.00E-02 | CYP27A1                  | 1 |
| Cell-To-Cell Signaling<br>and Interaction<br>Inflammatory<br>Response    | inflammatory response of bone<br>marrow-derived macrophages | 2.00E-02 | PROC                     | 1 |
| Organ Morphology                                                         | inflammatory response of bone<br>marrow-derived macrophages | 2.00E-02 | PROC                     | 1 |
| Small Molecule<br>Biochemistry                                           | lack of Harderian gland                                     | 2.00E-02 | ALDH1A1                  | 1 |
| Carbohydrate<br>Metabolism                                               | metabolism of UDP-N-<br>acetylglucosamine                   | 2.00E-02 | GFPT1                    | 1 |
| Nucleic Acid<br>Metabolism                                               | metabolism of UDP-N-<br>acetylglucosamine                   | 2.00E-02 | GFPT1                    | 1 |
| Cellular Development<br>Nervous System<br>Development and<br>Function    | proliferation of RPE cells                                  | 2.00E-02 | FGF1                     | 1 |
| Cellular Growth and<br>Proliferation                                     | proliferation of RPE cells                                  | 2.00E-02 | FGF1                     | 1 |
| Visual System<br>Development and<br>Function                             | proliferation of RPE cells                                  | 2.00E-02 | FGF1                     | 1 |
| Cellular Development<br>Cellular Growth and<br>Proliferation             | proliferation of RPE cells                                  | 2.00E-02 | FGF1                     | 1 |
| Connective Tissue<br>Development and<br>Function                         | proliferation of brown adipocytes                           | 2.00E-02 | FGF1                     | 1 |
| Amino Acid<br>Metabolism                                                 | proliferation of brown adipocytes                           | 2.00E-02 | FGF1                     | 1 |
| Small Molecule<br>Biochemistry                                           | quantity of arginine                                        | 2.00E-02 | ARG2 (includes EG:11847) | 1 |
| Molecular Transport                                                      | secretion of bile acid                                      | 2.00E-02 | CYP27A1                  | 1 |
| Lipid Metabolism                                                         | secretion of bile acid                                      | 2.00E-02 | CYP27A1                  | 1 |
|                                                                          | secretion of bile acid                                      | 2.00E-02 | CYP27A1                  | 1 |

|                                                      |                                                      |          |                                                                                                                                            |    |
|------------------------------------------------------|------------------------------------------------------|----------|--------------------------------------------------------------------------------------------------------------------------------------------|----|
| Cancer                                               | tumorigenesis of hepatocellular carcinoma            | 2.00E-02 | FAH,MAPK9                                                                                                                                  | 2  |
| Gastrointestinal Disease                             | tumorigenesis of hepatocellular carcinoma            | 2.00E-02 | FAH,MAPK9                                                                                                                                  | 2  |
| Hepatic System Disease                               | tumorigenesis of hepatocellular carcinoma            | 2.00E-02 | FAH,MAPK9                                                                                                                                  | 2  |
| Renal and Urological System Development and Function | abnormal morphology of nephron                       | 2.07E-02 | FAH,MAPK9                                                                                                                                  | 2  |
| Organ Morphology                                     | abnormal morphology of nephron                       | 2.07E-02 | FAH,MAPK9                                                                                                                                  | 2  |
| Small Molecule Biochemistry                          | synthesis of cholesterol                             | 2.07E-02 | CYP27A1,FGF1                                                                                                                               | 2  |
| Lipid Metabolism                                     | synthesis of cholesterol                             | 2.07E-02 | CYP27A1,FGF1                                                                                                                               | 2  |
| Vitamin and Mineral Metabolism                       | synthesis of cholesterol                             | 2.07E-02 | CYP27A1,FGF1                                                                                                                               | 2  |
| Small Molecule Biochemistry                          | quantity of creatinine in blood                      | 2.14E-02 | FAH,PROC                                                                                                                                   | 2  |
| Developmental Disorder                               | neural tube defect                                   | 2.18E-02 | ALDH1A1,LMO4,MAPK9                                                                                                                         | 3  |
| Neurological Disease                                 | neural tube defect                                   | 2.18E-02 | ALDH1A1,LMO4,MAPK9                                                                                                                         | 3  |
| Small Molecule Biochemistry                          | synthesis of terpenoid                               | 2.20E-02 | ALDH1A1,CYP27A1,FGF1,SLC27A2                                                                                                               | 4  |
| Lipid Metabolism                                     | synthesis of terpenoid                               | 2.20E-02 | ALDH1A1,CYP27A1,FGF1,SLC27A2                                                                                                               | 4  |
| Vitamin and Mineral Metabolism                       | synthesis of terpenoid                               | 2.20E-02 | ALDH1A1,CYP27A1,FGF1,SLC27A2                                                                                                               | 4  |
| Cancer                                               | carcinoma                                            | 2.21E-02 | ADAMTS9,ALDH1A1,ANK3,ANXA4,ARG2 (includes EG:11847),CREBL2,CRYL1,EPHB6,ESRRG,FAH,FGF1,FGS,HABP2,HPN,JAK1,MAPK9,PDZK1IP1,RXRG,SLC27A2,TIMP4 | 20 |
| Organ Morphology                                     | morphology of skin                                   | 2.23E-02 | DNASE1L2,LMO4,MAPK9,ST14                                                                                                                   | 4  |
| Hematological Disease                                | acute myeloid leukemia                               | 2.26E-02 | JAK1,RXRG,UBE2I                                                                                                                            | 3  |
| Cancer                                               | acute myeloid leukemia                               | 2.26E-02 | JAK1,RXRG,UBE2I                                                                                                                            | 3  |
| Hereditary Disorder                                  | progressive familial intrahepatic cholestasis type 1 | 2.36E-02 | CYP27A1,SLC35A1                                                                                                                            | 2  |
| Gastrointestinal Disease                             | progressive familial intrahepatic cholestasis type 1 | 2.36E-02 | CYP27A1,SLC35A1                                                                                                                            | 2  |
| Hepatic System Disease                               | progressive familial intrahepatic cholestasis type 1 | 2.36E-02 | CYP27A1,SLC35A1                                                                                                                            | 2  |
| Cancer                                               | arrest in mitosis of tumor cells                     | 2.39E-02 | ACRBP                                                                                                                                      | 1  |
| Cell Cycle                                           | arrest in mitosis of tumor cells                     | 2.39E-02 | ACRBP                                                                                                                                      | 1  |
| Tumor Morphology                                     | arrest in mitosis of tumor cells                     | 2.39E-02 | ACRBP                                                                                                                                      | 1  |
| Small Molecule Biochemistry                          | beta-oxidation of lignoceric acid                    | 2.39E-02 | SLC27A2                                                                                                                                    | 1  |
| Lipid Metabolism                                     | beta-oxidation of lignoceric acid                    | 2.39E-02 | SLC27A2                                                                                                                                    | 1  |
| Energy Production                                    | beta-oxidation of lignoceric acid                    | 2.39E-02 | SLC27A2                                                                                                                                    | 1  |
| Cellular Assembly and Organization                   | binding of polysomes                                 | 2.39E-02 | TIA1                                                                                                                                       | 1  |
| Cellular Compromise                                  | breakage of Plasma Membrane                          | 2.39E-02 | FGF1                                                                                                                                       | 1  |
| Cell Death and Survival                              | cell death of follicular cells                       | 2.39E-02 | PROC                                                                                                                                       | 1  |

|                                            |                                            |          |        |   |
|--------------------------------------------|--------------------------------------------|----------|--------|---|
| Dermatological Diseases and Conditions     | cutaneous lupus erythematosus              | 2.39E-02 | PROC   | 1 |
| Connective Tissue Disorders                | cutaneous lupus erythematosus              | 2.39E-02 | PROC   | 1 |
| Immunological Disease                      | cutaneous lupus erythematosus              | 2.39E-02 | PROC   | 1 |
| Skeletal and Muscular Disorders            | cutaneous lupus erythematosus              | 2.39E-02 | PROC   | 1 |
| Inflammatory Disease                       | cutaneous lupus erythematosus              | 2.39E-02 | PROC   | 1 |
| Small Molecule Biochemistry                | depletion of proteoglycan                  | 2.39E-02 | MAPK9  | 1 |
| Molecular Transport                        | depletion of proteoglycan                  | 2.39E-02 | MAPK9  | 1 |
| Carbohydrate Metabolism                    | depletion of proteoglycan                  | 2.39E-02 | MAPK9  | 1 |
| Tissue Development                         | development of trigeminal nerve            | 2.39E-02 | LMO4   | 1 |
| Nervous System Development and Function    | development of trigeminal nerve            | 2.39E-02 | LMO4   | 1 |
| Nervous System Development and Function    | docking of synaptic vesicles               | 2.39E-02 | STX3   | 1 |
| Cellular Assembly and Organization         | docking of synaptic vesicles               | 2.39E-02 | STX3   | 1 |
| Molecular Transport                        | efflux of Na+                              | 2.39E-02 | SCNN1G | 1 |
| Cellular Function and Maintenance          | efflux of Na+                              | 2.39E-02 | SCNN1G | 1 |
| Dermatological Diseases and Conditions     | hand dermatosis                            | 2.39E-02 | RXRG   | 1 |
| Tissue Morphology                          | lack of presphenoid bone                   | 2.39E-02 | LMO4   | 1 |
| Cell Morphology                            | mineralization of fibroblast cell lines    | 2.39E-02 | ESRRG  | 1 |
| Connective Tissue Development and Function | mineralization of fibroblast cell lines    | 2.39E-02 | ESRRG  | 1 |
| Organ Development                          | repair of liver                            | 2.39E-02 | MAPK9  | 1 |
| Organ Morphology                           | repair of liver                            | 2.39E-02 | MAPK9  | 1 |
| Gastrointestinal Disease                   | repair of liver                            | 2.39E-02 | MAPK9  | 1 |
| Hepatic System Disease                     | repair of liver                            | 2.39E-02 | MAPK9  | 1 |
| Organismal Injury and Abnormalities        | repair of liver                            | 2.39E-02 | MAPK9  | 1 |
| Digestive System Development and Function  | repair of liver                            | 2.39E-02 | MAPK9  | 1 |
| Hepatic System Development and Function    | repair of liver                            | 2.39E-02 | MAPK9  | 1 |
| Organismal Functions                       | repair of liver                            | 2.39E-02 | MAPK9  | 1 |
| Cancer                                     | tumorigenesis of ovarian cancer cell lines | 2.39E-02 | ST14   | 1 |

|                                        |                                                |          |               |   |
|----------------------------------------|------------------------------------------------|----------|---------------|---|
| Reproductive System Disease            | tumorigenesis of ovarian cancer cell lines     | 2.39E-02 | ST14          | 1 |
| Small Molecule                         |                                                |          |               |   |
| Biochemistry                           | utilization of fatty acid                      | 2.39E-02 | MAPK9         | 1 |
| Lipid Metabolism                       | utilization of fatty acid                      | 2.39E-02 | MAPK9         | 1 |
| Metabolic Disease                      | xanthomatosis                                  | 2.39E-02 | CYP27A1       | 1 |
| Dermatological Diseases and Conditions |                                                |          |               |   |
| Small Molecule                         | xanthomatosis                                  | 2.39E-02 | CYP27A1       | 1 |
| Biochemistry                           | synthesis of D-glucose                         | 2.43E-02 | ALDH1A1,ESRRG | 2 |
| Carbohydrate Metabolism                | synthesis of D-glucose                         | 2.43E-02 | ALDH1A1,ESRRG | 2 |
| Organ Morphology                       | abnormal morphology of nail                    | 2.79E-02 | DNASE1L2      | 1 |
| Cell Morphology                        | abnormal morphology of neutrophils             | 2.79E-02 | PROC          | 1 |
| Inflammatory Response                  | abnormal morphology of neutrophils             | 2.79E-02 | PROC          | 1 |
| Hematological System                   |                                                |          |               |   |
| Development and Function               | abnormal morphology of neutrophils             | 2.79E-02 | PROC          | 1 |
| Tissue Morphology                      | abnormal morphology of optic cup               | 2.79E-02 | ALDH1A1       | 1 |
| Cell Death and Survival                | apoptosis of dopaminergic neurons              | 2.79E-02 | MAPK9         | 1 |
| Developmental Disorder                 | cerebrotendinous xanthomatosis                 | 2.79E-02 | CYP27A1       | 1 |
| Hereditary Disorder                    | cerebrotendinous xanthomatosis                 | 2.79E-02 | CYP27A1       | 1 |
| Metabolic Disease                      | cerebrotendinous xanthomatosis                 | 2.79E-02 | CYP27A1       | 1 |
| Neurological Disease                   | cerebrotendinous xanthomatosis                 | 2.79E-02 | CYP27A1       | 1 |
| Behavior                               | discriminatory learning                        | 2.79E-02 | RASGRF1       | 1 |
| Cancer                                 | entry into S phase of Kaposi's sarcoma cells   | 2.79E-02 | FGF1          | 1 |
| Cell Cycle                             | entry into S phase of Kaposi's sarcoma cells   | 2.79E-02 | FGF1          | 1 |
| Hereditary Disorder                    | familial combined hyperlipidemia               | 2.79E-02 | RXRG          | 1 |
| Metabolic Disease                      | familial combined hyperlipidemia               | 2.79E-02 | RXRG          | 1 |
| Cardiovascular Disease                 | familial combined hyperlipidemia               | 2.79E-02 | RXRG          | 1 |
| Small Molecule                         |                                                |          |               |   |
| Biochemistry                           | metabolism of NADPH                            | 2.79E-02 | DCXR          | 1 |
| Nucleic Acid Metabolism                | metabolism of NADPH                            | 2.79E-02 | DCXR          | 1 |
| Cell Cycle                             | mitogenesis of B-lymphocyte derived cell lines | 2.79E-02 | FGF1          | 1 |
| Hematological System                   |                                                |          |               |   |
| Development and Function               | mitogenesis of B-lymphocyte derived cell lines | 2.79E-02 | FGF1          | 1 |
| Small Molecule                         |                                                |          |               |   |
| Biochemistry                           | oxidation of cholesterol                       | 2.79E-02 | CYP27A1       | 1 |
| Lipid Metabolism                       | oxidation of cholesterol                       | 2.79E-02 | CYP27A1       | 1 |
| Energy Production                      | oxidation of cholesterol                       | 2.79E-02 | CYP27A1       | 1 |
| Cellular Development                   | proliferation of Kaposi's sarcoma cells        | 2.79E-02 | FGF1          | 1 |
| Cellular Growth and Proliferation      | proliferation of Kaposi's sarcoma cells        | 2.79E-02 | FGF1          | 1 |

|                                                      |                                                    |                      |                                                                                                                                                                                           |         |
|------------------------------------------------------|----------------------------------------------------|----------------------|-------------------------------------------------------------------------------------------------------------------------------------------------------------------------------------------|---------|
| Tumor Morphology                                     | proliferation of Kaposi's sarcoma cells            | 2.79E-02             | FGF1                                                                                                                                                                                      | 1       |
| Tissue Morphology                                    | quantity of prostate cancer cell lines             | 2.79E-02             | HPN                                                                                                                                                                                       | 1       |
| Behavior                                             | social transmission of food preference             | 2.79E-02             | RASGRF1                                                                                                                                                                                   | 1       |
| Cell Death and Survival<br>Visual System             | survival of photoreceptors                         | 2.79E-02             | FGF1                                                                                                                                                                                      | 1       |
| Development and<br>Function                          | survival of photoreceptors                         | 2.79E-02             | FGF1                                                                                                                                                                                      | 1       |
| Amino Acid<br>Metabolism                             | synthesis of L-proline                             | 2.79E-02             | ARG2 (includes EG:11847)                                                                                                                                                                  | 1       |
| Small Molecule<br>Biochemistry                       | synthesis of L-proline                             | 2.79E-02             | ARG2 (includes EG:11847)                                                                                                                                                                  | 1       |
| Cell Death and Survival<br>Cancer                    | cell death of apud cells<br>prostatic carcinoma    | 2.82E-02<br>2.87E-02 | GFPT1,PROC<br>ARG2 (includes EG:11847),ESRRG,HPN,JAK1                                                                                                                                     | 2<br>4  |
| Reproductive System<br>Disease                       | prostatic carcinoma                                | 2.87E-02             | ARG2 (includes EG:11847),ESRRG,HPN,JAK1                                                                                                                                                   | 4       |
| Cancer                                               | genital tumor                                      | 2.90E-02             | ADAMTS9,ALDH1A1,ARG2 (includes EG:11847),EPHB6,ESRRG,FGF1,HPN,JAK1,TMPRSS2                                                                                                                | 9       |
| Reproductive System<br>Disease                       | genital tumor                                      | 2.90E-02             | ADAMTS9,ALDH1A1,ARG2 (includes EG:11847),EPHB6,ESRRG,FGF1,HPN,JAK1,TMPRSS2<br>AEBP2,CREBL2,CYP2S1,ESRRG,FGF1,FHOD1,GRHL1,AK1,LMO4,MAPK9,PER3,RASGRF1,RXRG,UBE2I,YEAT<br>S2                | 9<br>15 |
| Gene Expression                                      | transcription of RNA                               | 2.90E-02             |                                                                                                                                                                                           |         |
| Cardiovascular Disease                               | hypotension                                        | 2.91E-02             | PROC,SCNN1G                                                                                                                                                                               | 2       |
| Organ Morphology<br>Lymphoid Tissue                  | size of lymphoid organ                             | 2.91E-02             | JAK1,PROC                                                                                                                                                                                 | 2       |
| Structure and<br>Development                         | size of lymphoid organ                             | 2.91E-02             | JAK1,PROC                                                                                                                                                                                 | 2       |
| Cancer                                               | Cancer                                             | 2.98E-02             | ADAMTS9,ALDH1A1,ANK3,ANXA4,ARG2 (includes EG:11847),CREBL2,CRYL1,EPHB6,ESRRG,FAH,FGF1,PGS,HABP2,HDAC11,HPN,JAK1,LMO4,MAPK9,PDZK1<br>IP1,RXRG,SLC27A2,STX3,TIMP4,TMPRSS2,UBE2I,YEAT<br>TS2 | 26      |
| Organismal Survival                                  | organismal death                                   | 3.05E-02             | ACRBP,ANK3,DNAJB1,FAH,GAB1,GSTK1,IP6K2,JAK1,LMO4,MAPK9,PROC,TIA1,TIMP4                                                                                                                    | 13      |
| Cardiovascular System<br>Development and<br>Function | QT interval of heart                               | 3.18E-02             | ESRRG                                                                                                                                                                                     | 1       |
| Embryonic<br>Development                             | abnormal morphology of ocular<br>posterior segment | 3.18E-02             | ALDH1A1                                                                                                                                                                                   | 1       |
| Organ Development                                    | abnormal morphology of ocular<br>posterior segment | 3.18E-02             | ALDH1A1                                                                                                                                                                                   | 1       |
| Organismal<br>Development                            | abnormal morphology of ocular<br>posterior segment | 3.18E-02             | ALDH1A1                                                                                                                                                                                   | 1       |
| Tissue Development                                   | abnormal morphology of ocular<br>posterior segment | 3.18E-02             | ALDH1A1                                                                                                                                                                                   | 1       |
| Organ Morphology                                     | abnormal morphology of ocular<br>posterior segment | 3.18E-02             | ALDH1A1                                                                                                                                                                                   | 1       |



|                                                       |                                                 |          |                          |  |   |
|-------------------------------------------------------|-------------------------------------------------|----------|--------------------------|--|---|
| Visual System                                         |                                                 |          |                          |  |   |
| Development and Function                              | abnormal morphology of ocular posterior segment | 3.18E-02 | ALDH1A1                  |  | 1 |
| Embryonic Development                                 | abnormal morphology of sphenoid bone            | 3.18E-02 | LMO4                     |  | 1 |
| Organ Development                                     | abnormal morphology of sphenoid bone            | 3.18E-02 | LMO4                     |  | 1 |
| Organismal Development                                | abnormal morphology of sphenoid bone            | 3.18E-02 | LMO4                     |  | 1 |
| Tissue Development                                    | abnormal morphology of sphenoid bone            | 3.18E-02 | LMO4                     |  | 1 |
| Organ Morphology                                      | abnormal morphology of sphenoid bone            | 3.18E-02 | LMO4                     |  | 1 |
| Skeletal and Muscular System Development and Function | abnormal morphology of sphenoid bone            | 3.18E-02 | LMO4                     |  | 1 |
| Connective Tissue Development and Function            | abnormal morphology of sphenoid bone            | 3.18E-02 | LMO4                     |  | 1 |
| Organ Development                                     | activation of thyroid gland                     | 3.18E-02 | HPN                      |  | 1 |
| Endocrine System Development and Function             | activation of thyroid gland                     | 3.18E-02 | HPN                      |  | 1 |
| Dermatological Diseases and Conditions                | alopecia areata                                 | 3.18E-02 | RXRG                     |  | 1 |
| Cellular Development                                  | arrest in growth of bone cancer cell lines      | 3.18E-02 | FGF1                     |  | 1 |
| Cellular Growth and Proliferation                     | arrest in growth of bone cancer cell lines      | 3.18E-02 | FGF1                     |  | 1 |
| Small Molecule Biochemistry                           | concentration of tretinoin                      | 3.18E-02 | ALDH1A1                  |  | 1 |
| Drug Metabolism                                       | concentration of tretinoin                      | 3.18E-02 | ALDH1A1                  |  | 1 |
| Molecular Transport                                   | concentration of tretinoin                      | 3.18E-02 | ALDH1A1                  |  | 1 |
| Lipid Metabolism                                      | concentration of tretinoin                      | 3.18E-02 | ALDH1A1                  |  | 1 |
| Vitamin and Mineral Metabolism                        | concentration of tretinoin                      | 3.18E-02 | ALDH1A1                  |  | 1 |
| Cardiovascular System Development and Function        | diastolic function                              | 3.18E-02 | ARG2 (includes EG:11847) |  | 1 |
| Cellular Development                                  | differentiation of endodermal cells             | 3.18E-02 | MAPK9                    |  | 1 |
| Embryonic Development                                 | differentiation of endodermal cells             | 3.18E-02 | MAPK9                    |  | 1 |
| Tissue Development                                    | disruption of tight junctions                   | 3.18E-02 | PROC                     |  | 1 |
| Cell-To-Cell Signaling and Interaction                | disruption of tight junctions                   | 3.18E-02 | PROC                     |  | 1 |
| Cellular Assembly and Organization                    | disruption of tight junctions                   | 3.18E-02 | PROC                     |  | 1 |
| Cellular Compromise                                   | disruption of tight junctions                   | 3.18E-02 | PROC                     |  | 1 |

|                                                    |                                                                               |                      |                 |        |
|----------------------------------------------------|-------------------------------------------------------------------------------|----------------------|-----------------|--------|
| Cellular Compromise<br>Small Molecule              | injury of endothelial cells                                                   | 3.18E-02             | PROC            | 1      |
| Biochemistry<br>Carbohydrate                       | metabolism of fructose-6-phosphate                                            | 3.18E-02             | GFPT1           | 1      |
| Metabolism                                         | metabolism of fructose-6-phosphate                                            | 3.18E-02             | GFPT1           | 1      |
| Cellular Development<br>Nervous System             | myelination of oligodendrocytes                                               | 3.18E-02             | FGF1            | 1      |
| Development and<br>Function                        | myelination of oligodendrocytes                                               | 3.18E-02             | FGF1            | 1      |
| Small Molecule<br>Biochemistry                     | oxidation of retinaldehyde                                                    | 3.18E-02             | ALDH1A1         | 1      |
| Lipid Metabolism                                   | oxidation of retinaldehyde                                                    | 3.18E-02             | ALDH1A1         | 1      |
| Vitamin and Mineral<br>Metabolism                  | oxidation of retinaldehyde                                                    | 3.18E-02             | ALDH1A1         | 1      |
| Energy Production                                  | oxidation of retinaldehyde                                                    | 3.18E-02             | ALDH1A1         | 1      |
| Cell Morphology                                    | permeabilization of liposome                                                  | 3.18E-02             | FGF1            | 1      |
| Cell Death and Survival<br>Cellular Function and   | reconstitution of cells                                                       | 3.18E-02             | JAK1            | 1      |
| Maintenance                                        | reconstitution of cells                                                       | 3.18E-02             | JAK1            | 1      |
| Cancer                                             | size of digestive organ tumor                                                 | 3.18E-02             | HABP2           | 1      |
| Gastrointestinal<br>Disease                        | size of digestive organ tumor                                                 | 3.18E-02             | HABP2           | 1      |
| Tumor Morphology                                   | size of digestive organ tumor                                                 | 3.18E-02             | HABP2           | 1      |
| Connective Tissue<br>Disorders                     | Dupuytren contracture<br>arrest in cell cycle progression of brain            | 3.32E-02             | ADAMTS9,TIMP4   | 2      |
| Cell Cycle<br>Small Molecule                       | cancer cell lines                                                             | 3.57E-02             | MAPK9           | 1      |
| Biochemistry                                       | binding of progesterone                                                       | 3.57E-02             | DNAJB1          | 1      |
| Drug Metabolism                                    | binding of progesterone                                                       | 3.57E-02             | DNAJB1          | 1      |
| Endocrine System<br>Development and                |                                                                               |                      |                 |        |
| Function                                           | binding of progesterone                                                       | 3.57E-02             | DNAJB1          | 1      |
| Lipid Metabolism                                   | binding of progesterone                                                       | 3.57E-02             | DNAJB1          | 1      |
| Protein Synthesis                                  | catabolism of glycoprotein                                                    | 3.57E-02             | ADAMTS9         | 1      |
| Protein Degradation<br>Embryonic<br>Development    | catabolism of glycoprotein<br>development of labyrinthine zone of<br>placenta | 3.57E-02<br>3.57E-02 | ADAMTS9<br>GAB1 | 1<br>1 |
| Organ Development                                  | development of labyrinthine zone of<br>placenta                               | 3.57E-02             | GAB1            | 1      |
| Organismal<br>Development                          | development of labyrinthine zone of<br>placenta                               | 3.57E-02             | GAB1            | 1      |
| Tissue Development                                 | development of labyrinthine zone of<br>placenta                               | 3.57E-02             | GAB1            | 1      |
| Reproductive System<br>Development and<br>Function | development of labyrinthine zone of<br>placenta                               | 3.57E-02             | GAB1            | 1      |
| Nervous System<br>Development and<br>Function      | function of inner hair cells                                                  | 3.57E-02             | HPN             | 1      |
| Cellular Function and<br>Maintenance               | function of inner hair cells                                                  | 3.57E-02             | HPN             | 1      |

|                         |                                      |          |                             |   |
|-------------------------|--------------------------------------|----------|-----------------------------|---|
| Nervous System          |                                      |          |                             |   |
| Development and         |                                      |          |                             |   |
| Function                | function of outer hair cells         | 3.57E-02 | HPN                         | 1 |
| Cellular Function and   |                                      |          |                             |   |
| Maintenance             | function of outer hair cells         | 3.57E-02 | HPN                         | 1 |
| Cellular Development    |                                      |          |                             |   |
| Cellular Growth and     | proliferation of adipoblasts         | 3.57E-02 | FGF1                        | 1 |
| Proliferation           | proliferation of adipoblasts         | 3.57E-02 | FGF1                        | 1 |
| Connective Tissue       |                                      |          |                             |   |
| Development and         | proliferation of adipoblasts         | 3.57E-02 | FGF1                        | 1 |
| Function                | proliferation of adipoblasts         | 3.57E-02 | FGF1                        | 1 |
| Organismal              |                                      |          |                             |   |
| Development             | quantity of microvessel              | 3.57E-02 | ADAMTS9                     | 1 |
| Cardiovascular System   |                                      |          |                             |   |
| Development and         |                                      |          |                             |   |
| Function                | quantity of microvessel              | 3.57E-02 | ADAMTS9                     | 1 |
| Tissue Morphology       | quantity of microvessel              | 3.57E-02 | ADAMTS9                     | 1 |
| Cardiovascular Disease  |                                      |          |                             |   |
| Organismal Injury and   | reperfusion injury of heart          | 3.57E-02 | MAPK9                       | 1 |
| Abnormalities           | reperfusion injury of heart          | 3.57E-02 | MAPK9                       | 1 |
| Small Molecule          |                                      |          |                             |   |
| Biochemistry            | secretion of hyaluronic acid         | 3.57E-02 | GAB1                        | 1 |
| Drug Metabolism         | secretion of hyaluronic acid         | 3.57E-02 | GAB1                        | 1 |
| Molecular Transport     | secretion of hyaluronic acid         | 3.57E-02 | GAB1                        | 1 |
| Carbohydrate            |                                      |          |                             |   |
| Metabolism              | secretion of hyaluronic acid         | 3.57E-02 | GAB1                        | 1 |
| Cellular Movement       | migration of brain cells             | 3.58E-02 | CADPS2,LMO4                 | 2 |
| Cell Death and Survival |                                      |          |                             |   |
| Cellular Movement       | cell death of endothelial cells      | 3.65E-02 | FGF1,MAPK9,PROC             | 3 |
| Small Molecule          | invasion of breast cancer cell lines | 3.65E-02 | EPHB6,FHOD1,TIMP4           | 3 |
| Biochemistry            | metabolism of terpenoid              | 3.69E-02 | ALDH1A1,CYP27A1,CYP2S1,FGF1 | 4 |
| Lipid Metabolism        | metabolism of terpenoid              | 3.69E-02 | ALDH1A1,CYP27A1,CYP2S1,FGF1 | 4 |
| Vitamin and Mineral     |                                      |          |                             |   |
| Metabolism              | metabolism of terpenoid              | 3.69E-02 | ALDH1A1,CYP27A1,CYP2S1,FGF1 | 4 |
|                         | apoptosis of pheochromocytoma cell   |          |                             |   |
| Cell Death and Survival | lines                                | 3.85E-02 | GAB1,MAPK9                  | 2 |
| Organ Development       |                                      |          |                             |   |
| Digestive System        | function of liver                    | 3.85E-02 | FAH,MAPK9                   | 2 |
| Development and         |                                      |          |                             |   |
| Function                | function of liver                    | 3.85E-02 | FAH,MAPK9                   | 2 |
| Hepatic System          |                                      |          |                             |   |
| Development and         | function of liver                    | 3.85E-02 | FAH,MAPK9                   | 2 |
| Function                | function of liver                    | 3.85E-02 | FAH,MAPK9                   | 2 |
| Metabolic Disease       | aminoaciduria                        | 3.96E-02 | FAH                         | 1 |
| Renal and Urological    |                                      |          |                             |   |
| Disease                 | aminoaciduria                        | 3.96E-02 | FAH                         | 1 |
| Nervous System          |                                      |          |                             |   |
| Development and         |                                      |          |                             |   |
| Function                | circadian persistence                | 3.96E-02 | PER3                        | 1 |
| Behavior                | circadian persistence                | 3.96E-02 | PER3                        | 1 |
| Small Molecule          |                                      |          |                             |   |
| Biochemistry            | metabolism of adenosine              | 3.96E-02 | NT5C3                       | 1 |

|                                                                             |                                                                        |          |                                                                                      |        |
|-----------------------------------------------------------------------------|------------------------------------------------------------------------|----------|--------------------------------------------------------------------------------------|--------|
| DNA Replication,<br>Recombination, and<br>Repair                            | metabolism of adenosine                                                | 3.96E-02 | NT5C3                                                                                | 1      |
| Nucleic Acid<br>Metabolism                                                  | metabolism of adenosine                                                | 3.96E-02 | NT5C3                                                                                | 1      |
| Cardiovascular System<br>Development and<br>Function                        | migration of lymphatic endothelial cells                               | 3.96E-02 | FGF1                                                                                 | 1      |
| Cellular Movement<br>Immune Cell<br>Trafficking                             | migration of lymphatic endothelial cells                               | 3.96E-02 | FGF1                                                                                 | 1      |
| Cell Morphology<br>Cancer                                                   | morphology of lymphoma cell lines<br>multiplicity of tumor             | 3.96E-02 | RASGRF1<br>MAPK9                                                                     | 1<br>1 |
| Cell Morphology<br>Cellular Assembly and<br>Organization                    | permeability of plasma membrane<br>permeability of plasma membrane     | 3.96E-02 | FGF1<br>FGF1                                                                         | 1<br>1 |
| Cellular Function and<br>Maintenance                                        | permeability of plasma membrane                                        | 3.96E-02 | FGF1                                                                                 | 1      |
| Infectious Disease<br>Behavior                                              | production of Influenza A virus<br>pup retrieval                       | 3.96E-02 | TMPRSS2<br>EPHB6                                                                     | 1<br>1 |
| Reproductive System<br>Development and<br>Function                          | pup retrieval                                                          | 3.96E-02 | EPHB6                                                                                | 1      |
| Small Molecule<br>Biochemistry                                              | release of cholesterol                                                 | 3.96E-02 | FGF1                                                                                 | 1      |
| Molecular Transport                                                         | release of cholesterol                                                 | 3.96E-02 | FGF1                                                                                 | 1      |
| Lipid Metabolism<br>Small Molecule<br>Biochemistry                          | release of cholesterol<br>synthesis of 9-cis-retinoic acid             | 3.96E-02 | FGF1<br>ALDH1A1                                                                      | 1<br>1 |
| Drug Metabolism                                                             | synthesis of 9-cis-retinoic acid                                       | 3.96E-02 | ALDH1A1                                                                              | 1      |
| Lipid Metabolism                                                            | synthesis of 9-cis-retinoic acid                                       | 3.96E-02 | ALDH1A1                                                                              | 1      |
| Vitamin and Mineral<br>Metabolism                                           | synthesis of 9-cis-retinoic acid                                       | 3.96E-02 | ALDH1A1                                                                              | 1      |
| Nervous System<br>Development and<br>Function                               | spatial memory                                                         | 4.04E-02 | CADPS2,RASGRF1                                                                       | 2      |
| Behavior                                                                    | spatial memory                                                         | 4.04E-02 | CADPS2,RASGRF1                                                                       | 2      |
| Cell Morphology<br>Cellular Assembly and<br>Organization                    | formation of cellular protrusions<br>formation of cellular protrusions | 4.05E-02 | FGF1,GAB1,MAPK9,PROC,RAB3IP,RASGRF1,STX3<br>FGF1,GAB1,MAPK9,PROC,RAB3IP,RASGRF1,STX3 | 7<br>7 |
| Cellular Function and<br>Maintenance                                        | formation of cellular protrusions                                      | 4.05E-02 | FGF1,GAB1,MAPK9,PROC,RAB3IP,RASGRF1,STX3                                             | 7      |
| Cell Death and Survival<br>Connective Tissue<br>Development and<br>Function | cell viability of fibroblasts<br>cell viability of fibroblasts         | 4.13E-02 | GAB1,MAPK9<br>GAB1,MAPK9                                                             | 2<br>2 |
| Behavior<br>Digestive System<br>Development and<br>Function                 | suckling<br>suckling                                                   | 4.13E-02 | JAK1,PROC<br>JAK1,PROC                                                               | 2<br>2 |

|                                                       |                                            |          |                         |   |
|-------------------------------------------------------|--------------------------------------------|----------|-------------------------|---|
| Cellular Development                                  | branching of epithelial tissue             | 4.35E-02 | FGF1                    | 1 |
| Tissue Development                                    | branching of epithelial tissue             | 4.35E-02 | FGF1                    | 1 |
| Cell Morphology                                       | cell spreading of breast cancer cell lines | 4.35E-02 | EPHB6                   | 1 |
| Cellular Movement                                     | chemotaxis of fibroblast cell lines        | 4.35E-02 | GAB1                    | 1 |
| Connective Tissue Development and Function            | chemotaxis of fibroblast cell lines        | 4.35E-02 | GAB1                    | 1 |
| Nervous System Development and Function               | cytotoxicity of neurons                    | 4.35E-02 | PROC                    | 1 |
| Cell Death and Survival                               | cytotoxicity of neurons                    | 4.35E-02 | PROC                    | 1 |
| Embryonic Development                                 | development of hindgut                     | 4.35E-02 | ALDH1A1                 | 1 |
| Organismal Development                                | development of hindgut                     | 4.35E-02 | ALDH1A1                 | 1 |
| Tissue Development                                    | development of hindgut                     | 4.35E-02 | ALDH1A1                 | 1 |
| Cellular Development                                  | differentiation of adipose cell lines      | 4.35E-02 | FGF1                    | 1 |
| Connective Tissue Development and Function            | differentiation of adipose cell lines      | 4.35E-02 | FGF1                    | 1 |
| Small Molecule Biochemistry                           | exocytosis of norepinephrine               | 4.35E-02 | STX3                    | 1 |
| Drug Metabolism                                       | exocytosis of norepinephrine               | 4.35E-02 | STX3                    | 1 |
| Molecular Transport                                   | exocytosis of norepinephrine               | 4.35E-02 | STX3                    | 1 |
| Cell-To-Cell Signaling and Interaction                | exocytosis of norepinephrine               | 4.35E-02 | STX3                    | 1 |
| Cellular Function and Maintenance                     | exocytosis of norepinephrine               | 4.35E-02 | STX3                    | 1 |
| Cellular Movement                                     | migration of muscle precursor cells        | 4.35E-02 | GAB1                    | 1 |
| Skeletal and Muscular System Development and Function | migration of muscle precursor cells        | 4.35E-02 | GAB1                    | 1 |
| Cancer                                                | quantity of papilloma                      | 4.35E-02 | MAPK9                   | 1 |
| Small Molecule Biochemistry                           | synthesis of tretinoin                     | 4.35E-02 | ALDH1A1                 | 1 |
| Drug Metabolism                                       | synthesis of tretinoin                     | 4.35E-02 | ALDH1A1                 | 1 |
| Lipid Metabolism                                      | synthesis of tretinoin                     | 4.35E-02 | ALDH1A1                 | 1 |
| Vitamin and Mineral Metabolism                        | synthesis of tretinoin                     | 4.35E-02 | ALDH1A1                 | 1 |
| Small Molecule Biochemistry                           | oxidation of lipid                         | 4.40E-02 | ALDH1A1,CYP27A1,SLC27A2 | 3 |
| Lipid Metabolism                                      | oxidation of lipid                         | 4.40E-02 | ALDH1A1,CYP27A1,SLC27A2 | 3 |
| Energy Production                                     | oxidation of lipid                         | 4.40E-02 | ALDH1A1,CYP27A1,SLC27A2 | 3 |
| Nervous System Development and Function               | circadian rhythm                           | 4.41E-02 | CADPS2,PER3             | 2 |
| Behavior                                              | circadian rhythm                           | 4.41E-02 | CADPS2,PER3             | 2 |

|                                                                                 |                                                |          |                                                                                         |    |
|---------------------------------------------------------------------------------|------------------------------------------------|----------|-----------------------------------------------------------------------------------------|----|
| Cell Death and Survival                                                         | necrosis of pancreas                           | 4.41E-02 | GFPT1,PROC                                                                              | 2  |
| Tissue Development                                                              | development of epithelial tissue               | 4.42E-02 | FGF1,GAB1,HABP2,MAPK9,PROC                                                              | 5  |
| Cell Death and Survival                                                         | cell death of kidney cells                     | 4.56E-02 | FGF1,GFPT1,IP6K2,PROC                                                                   | 4  |
| Nervous System<br>Development and<br>Function                                   | abnormal morphology of cerebellum              | 4.61E-02 | ANK3,CADPS2                                                                             | 2  |
| Organ Morphology<br>Nervous System<br>Development and<br>Function               | abnormal morphology of cerebellum              | 4.61E-02 | ANK3,CADPS2                                                                             | 2  |
| Cellular Function and<br>Maintenance                                            | function of neurons                            | 4.61E-02 | CADPS2,HPN                                                                              | 2  |
| Gene Expression<br>Lymphoid Tissue<br>Structure and<br>Development              | transcription of DNA                           | 4.61E-02 | CADPS2,HPN<br>AEBP2,CREBL2,ESRRG,FGF1,FHOD1,GRHL1,LMO4,M<br>APK9,PER3,RXRG,UBE21,YEATS2 | 12 |
| Tissue Development                                                              | abnormal morphology of lymph node<br>cortex    | 4.73E-02 | PROC                                                                                    | 1  |
| Tissue Development                                                              | adhesion of microvascular endothelial<br>cells | 4.73E-02 | PROC                                                                                    | 1  |
| Cardiovascular System<br>Development and<br>Function                            | adhesion of microvascular endothelial<br>cells | 4.73E-02 | PROC                                                                                    | 1  |
| Cell-To-Cell Signaling<br>and Interaction<br>Post-Translational<br>Modification | adhesion of microvascular endothelial<br>cells | 4.73E-02 | PROC                                                                                    | 1  |
| Small Molecule<br>Biochemistry<br>Drug Metabolism<br>Carbohydrate<br>Metabolism | aggregation of protein                         | 4.73E-02 | DNAJB1                                                                                  | 1  |
|                                                                                 | binding of heparin                             | 4.73E-02 | FGF1                                                                                    | 1  |
|                                                                                 | binding of heparin                             | 4.73E-02 | FGF1                                                                                    | 1  |
|                                                                                 | binding of heparin                             | 4.73E-02 | FGF1                                                                                    | 1  |
| Cellular Development<br>Embryonic<br>Development                                | branching of kidney cell lines                 | 4.73E-02 | GAB1                                                                                    | 1  |
|                                                                                 | branching of kidney cell lines                 | 4.73E-02 | GAB1                                                                                    | 1  |
| Organ Development<br>Organismal<br>Development                                  | branching of kidney cell lines                 | 4.73E-02 | GAB1                                                                                    | 1  |
|                                                                                 | branching of kidney cell lines                 | 4.73E-02 | GAB1                                                                                    | 1  |
| Tissue Development                                                              | branching of kidney cell lines                 | 4.73E-02 | GAB1                                                                                    | 1  |
| Renal and Urological<br>System Development<br>and Function<br>Cell Morphology   | branching of kidney cell lines                 | 4.73E-02 | GAB1                                                                                    | 1  |
|                                                                                 | branching of kidney cell lines                 | 4.73E-02 | GAB1                                                                                    | 1  |
| Cell Death and Survival                                                         | cell death of RPE cells                        | 4.73E-02 | FGF1                                                                                    | 1  |
| Organismal Survival                                                             | delay in organismal death                      | 4.73E-02 | PROC                                                                                    | 1  |
| Infectious Disease                                                              | dengue shock syndrome                          | 4.73E-02 | PROC                                                                                    | 1  |
| Cellular Development                                                            | development of interneurons                    | 4.73E-02 | CADPS2                                                                                  | 1  |

|                                                                                                         |                                                 |          |                |   |
|---------------------------------------------------------------------------------------------------------|-------------------------------------------------|----------|----------------|---|
| Tissue Development<br>Nervous System<br>Development and<br>Function                                     | development of interneurons                     | 4.73E-02 | CADPS2         | 1 |
|                                                                                                         | development of interneurons                     | 4.73E-02 | CADPS2         | 1 |
| Cellular Development<br>Hepatic System<br>Development and<br>Function                                   | differentiation of hepatocytes                  | 4.73E-02 | FGF1           | 1 |
|                                                                                                         | differentiation of hepatocytes                  | 4.73E-02 | FGF1           | 1 |
| Cellular Development<br>Embryonic<br>Development                                                        | differentiation of mesodermal cells             | 4.73E-02 | MAPK9          | 1 |
|                                                                                                         | differentiation of mesodermal cells             | 4.73E-02 | MAPK9          | 1 |
| Organismal Functions<br>Organismal<br>Development<br>Cellular Growth and<br>Proliferation<br>Cell Cycle | glycemic control                                | 4.73E-02 | GAB1           | 1 |
|                                                                                                         | growth of <i>Pseudomonas aeruginosa</i>         | 4.73E-02 | FGF1           | 1 |
|                                                                                                         | growth of <i>Pseudomonas aeruginosa</i>         | 4.73E-02 | FGF1           | 1 |
|                                                                                                         | mitosis of smooth muscle cells                  | 4.73E-02 | PROC           | 1 |
| Skeletal and Muscular<br>System Development<br>and Function                                             | mitosis of smooth muscle cells                  | 4.73E-02 | PROC           | 1 |
|                                                                                                         | proliferation of lymphatic endothelial<br>cells | 4.73E-02 | FGF1           | 1 |
| Cellular Development<br>Organismal<br>Development                                                       | proliferation of lymphatic endothelial<br>cells | 4.73E-02 | FGF1           | 1 |
|                                                                                                         | proliferation of lymphatic endothelial<br>cells | 4.73E-02 | FGF1           | 1 |
| Tissue Development                                                                                      | cells                                           | 4.73E-02 | FGF1           | 1 |
| Cardiovascular System<br>Development and<br>Function                                                    | proliferation of lymphatic endothelial<br>cells | 4.73E-02 | FGF1           | 1 |
| Cellular Growth and<br>Proliferation<br>Lymphoid Tissue<br>Structure and<br>Development                 | proliferation of lymphatic endothelial<br>cells | 4.73E-02 | FGF1           | 1 |
| Organismal Injury and<br>Abnormalities                                                                  | quantity of nodule                              | 4.73E-02 | PROC           | 1 |
| Cardiovascular System<br>Development and<br>Function                                                    | relaxation of aorta                             | 4.73E-02 | MAPK9          | 1 |
| Tissue Morphology                                                                                       | relaxation of aorta                             | 4.73E-02 | MAPK9          | 1 |
| Nervous System<br>Development and<br>Function                                                           | size of perikaryon                              | 4.73E-02 | RASGRF1        | 1 |
| Cell Morphology                                                                                         | size of perikaryon                              | 4.73E-02 | RASGRF1        | 1 |
| Cellular Assembly and<br>Organization                                                                   | size of perikaryon                              | 4.73E-02 | RASGRF1        | 1 |
| Endocrine System<br>Development and<br>Function                                                         | morphology of islets of Langerhans              | 4.80E-02 | CADPS2,RASGRF1 | 2 |
| Organ Morphology                                                                                        | morphology of islets of Langerhans              | 4.80E-02 | CADPS2,RASGRF1 | 2 |

|                                           |                                    |          |                                                                                                    |    |
|-------------------------------------------|------------------------------------|----------|----------------------------------------------------------------------------------------------------|----|
| Digestive System Development and Function | morphology of islets of Langerhans | 4.80E-02 | CADPS2,RASGRF1                                                                                     | 2  |
| Small Molecule Biochemistry               | release of Ca2+                    | 4.85E-02 | LMO4,PROC,ST14                                                                                     | 3  |
| Molecular Transport                       | release of Ca2+                    | 4.85E-02 | LMO4,PROC,ST14                                                                                     | 3  |
| Cell Signaling                            | release of Ca2+                    | 4.85E-02 | LMO4,PROC,ST14                                                                                     | 3  |
| Vitamin and Mineral Metabolism            | release of Ca2+                    | 4.85E-02 | LMO4,PROC,ST14                                                                                     | 3  |
| Small Molecule Biochemistry               | synthesis of acylglycerol          | 4.90E-02 | ALDH1A1,ESRRG                                                                                      | 2  |
| Lipid Metabolism                          | synthesis of acylglycerol          | 4.90E-02 | ALDH1A1,ESRRG                                                                                      | 2  |
| Cell Death and Survival                   | necrosis                           | 4.92E-02 | ALDH1A1,CADPS2,CREBL2,DNAJB1,EPHB6,FAH,FGF1,GAB1,GFPT1,HDAC11,HPN,IP6K2,JAK1,MAPK9,PROC,ST14,TIMP4 | 17 |
| Gene Expression                           | transactivation                    | 4.98E-02 | ESRRG,FGF1,JAK1,LMO4,RXRG,UBE2I                                                                    | 6  |

### PTEN Loss Unchanged, ERG Up

| Category                                       | Term                               | Count    | P-Value                                                                                                                                                                                                                                                                                              | Genes |
|------------------------------------------------|------------------------------------|----------|------------------------------------------------------------------------------------------------------------------------------------------------------------------------------------------------------------------------------------------------------------------------------------------------------|-------|
| Cellular Movement                              | cell movement                      | 2.63E-10 | ADAM9,ADAMTS1,ANGPT2,ANGPTL4,APBB2,CAMK2N2,CD93,CDKN1A,CHL1,CYR61,DAB2,DOK1,EGFL7,ELMO1,EPHB4,FLNC,FSCN1 (includes EG:14086),GIPC1,HBEGF,HDC,ITGA5,KANK1,KLF2,LRRK2,MMP9,NDRG2,NES,NOS3,PDE2A,PDE4B,PECAM1,PIP5K1C,PLXND1,RAP1GAP,RCAN1,SMO,ST3GAL4,TGFB1,THBD,TM4SF1,TNFRSF1A,TUBA1A,VWF,WISP1,ZEB1 | 45    |
| Cellular Movement                              | migration of cells                 | 1.40E-09 | ADAM9,ADAMTS1,ANGPT2,ANGPTL4,APBB2,CD93,CDKN1A,CHL1,CYR61,DAB2,EGFL7,ELMO1,EPHB4,FLNC,FSCN1 (includes EG:14086),GIPC1,HBEGF,HDC,ITGA5,KANK1,KLF2,LRRK2,MMP9,NDRG2,NES,NOS3,PDE2A,PDE4B,PECAM1,PIP5K1C,PLXND1,RAP1GAP,RCAN1,SMO,ST3GAL4,TGFB1,TM4SF1,TNFRSF1A,TUBA1A,VWF,ZEB1                         | 41    |
| Cardiovascular System Development and Function | vasculogenesis                     | 1.53E-08 | ADAM9,ADAMTS1,ANGPT2,ANGPTL4,CDKN1A,CYR61,DAB2,EPHB4,ITGA5,KLF2,MMP9,NOS3,PDE2A,PLCD3,PLXND1,RCAN1,RHOJ,SMO,TGFB1,THBD,TM4SF1,TNFRSF1A,ZEB1                                                                                                                                                          | 23    |
| Organismal Development                         | vasculogenesis                     | 1.53E-08 | ADAM9,ADAMTS1,ANGPT2,ANGPTL4,CDKN1A,CYR61,DAB2,EPHB4,ITGA5,KLF2,MMP9,NOS3,PDE2A,PLCD3,PLXND1,RCAN1,RHOJ,SMO,TGFB1,THBD,TM4SF1,TNFRSF1A,ZEB1                                                                                                                                                          | 23    |
| Cardiovascular System Development and Function | angiogenesis                       | 2.39E-08 | ADAMTS1,ANGPT2,ANGPTL4,CYR61,EPHB4,FBLN2,ITGA5,KLF2,MAP3K6,MMP9,NOS3,PDE2A,PLCD3,PLXND1,RCAN1,RHOJ,TGFB1,THBD,TM4SF1,TNFRSF1A,WISP1,ZEB1                                                                                                                                                             | 22    |
| Cellular Movement                              | cell movement of endothelial cells | 2.83E-08 | ADAMTS1,ANGPT2,ANGPTL4,CYR61,EGFL7,EPHB4,GIPC1,KLF2,MMP9,NOS3,PDE2A,PECAM1,PLXND1,TGFB1,THBD                                                                                                                                                                                                         | 15    |
| Cardiovascular System Development and Function | cell movement of endothelial cells | 2.83E-08 | ADAMTS1,ANGPT2,ANGPTL4,CYR61,EGFL7,EPHB4,GIPC1,KLF2,MMP9,NOS3,PDE2A,PECAM1,PLXND1,TGFB1,THBD                                                                                                                                                                                                         | 15    |
| Cellular Movement                              | migration of endothelial cells     | 6.50E-08 | ADAMTS1,ANGPT2,ANGPTL4,CYR61,EGFL7,EPHB4,GIPC1,KLF2,MMP9,NOS3,PDE2A,PECAM1,PLXND1,TGFB1                                                                                                                                                                                                              | 14    |



|                                                      |                                      |          |                                                                                                                                                           |    |
|------------------------------------------------------|--------------------------------------|----------|-----------------------------------------------------------------------------------------------------------------------------------------------------------|----|
| Cardiovascular System Development and Function       | migration of endothelial cells       | 6.50E-08 | ADAMTS1,ANGPT2,ANGPTL4,CYR61,EGFL7,EPHB4,GIPC1,KLF2,MMP9,NOS3,PDE2A,PECAM1,PLXND1,TGFB1                                                                   | 14 |
| Tissue Development                                   | aggregation of cells                 | 1.46E-07 | CDKN1A,CP,DAB2,EGFL7,HDC,ITGA5,MMP9,NOS3,PECAM1,STXBP1,TGFB1,THBD,TNFRSF1A,VWF                                                                            | 14 |
| Cancer                                               | metastasis                           | 2.53E-07 | ADAM9,ADAMTS1,ANGPT2,ANGPTL4,CDKN1A,CYR61,EGFL7,ITGA5,MMP9,NOS3,PECAM1,SLC12A8,SMO,TGFB1,THBD,TM4SF1,TUBA1A,WISP1,ZEB1                                    | 19 |
| Cancer                                               | follicular thyroid cancer            | 3.04E-07 | ADAMTS1,ANGPT2,EPHB4,ITGA5,MMP9,TGFB1                                                                                                                     | 6  |
| Endocrine System Disorders                           | follicular thyroid cancer            | 3.04E-07 | ADAMTS1,ANGPT2,EPHB4,ITGA5,MMP9,TGFB1                                                                                                                     | 6  |
| Cancer                                               | adenocarcinoma                       | 4.68E-07 | ADAMTS1,CDKN1A,CP,DAB2,DOK1,FLNC,FRZB,H19,HNF4A,ITGA5,KCNK6,KLF2,MMP9,PDE2A,PLLP,RAP1GAP,SMO,SPARCL1,TGFB1,THBD,TM4SF1,TSHZ3,TUBA1A,VWF,ZEB1              | 25 |
| Tissue Development                                   | adhesion of tumor cell lines         | 5.31E-07 | ADAM9,CYR61,DAB2,EGFL7,ITGA5,NOS3,PVRL3,RAP1GAP,RCAN1,TGFB1,THBD,ZEB1                                                                                     | 12 |
| Cell-To-Cell Signaling and Interaction               | adhesion of tumor cell lines         | 5.31E-07 | ADAM9,CYR61,DAB2,EGFL7,ITGA5,NOS3,PVRL3,RAP1GAP,RCAN1,TGFB1,THBD,ZEB1                                                                                     | 12 |
| Organismal Development                               | kidney development                   | 1.20E-06 | ADAMTS1,ANXA4,CDKN1A,EHD3,H19,HBEGF,LRRK2,MMP9,NOS3,SMO,TGFB1,TSHZ3                                                                                       | 12 |
| Tissue Development                                   | kidney development                   | 1.20E-06 | ADAMTS1,ANXA4,CDKN1A,EHD3,H19,HBEGF,LRRK2,MMP9,NOS3,SMO,TGFB1,TSHZ3                                                                                       | 12 |
| Embryonic Development                                | kidney development                   | 1.20E-06 | ADAMTS1,ANXA4,CDKN1A,EHD3,H19,HBEGF,LRRK2,MMP9,NOS3,SMO,TGFB1,TSHZ3                                                                                       | 12 |
| Organ Development                                    | kidney development                   | 1.20E-06 | ADAMTS1,ANXA4,CDKN1A,EHD3,H19,HBEGF,LRRK2,MMP9,NOS3,SMO,TGFB1,TSHZ3                                                                                       | 12 |
| Renal and Urological System Development and Function | kidney development                   | 1.20E-06 | ADAMTS1,ANXA4,CDKN1A,EHD3,H19,HBEGF,LRRK2,MMP9,NOS3,SMO,TGFB1,TSHZ3                                                                                       | 12 |
| Cancer                                               | growth of tumor                      | 1.48E-06 | ADAM9,ADAMTS1,ANGPT2,ANGPTL4,CDKN1A,EGFL7,EPHB4,HBEGF,ITGA5,MAP3K6,MMP9,TGFB1,THBD,WISP1                                                                  | 14 |
| Cancer                                               | neoplasia of cells                   | 1.74E-06 | ADAMTS1,ANGPT2,ANGPTL4,CAMK2N2,CDKN1A,CYR61,MMP9,NOS3,SMO,TGFB1,THBD,WISP1,ZEB1                                                                           | 13 |
| Cardiovascular System Development and Function       | development of cardiovascular system | 1.92E-06 | ADAM9,ADAMTS1,ANGPT2,ANGPTL4,CDKN1A,CYR61,DAB2,EGFL7,EPHB4,ITGA5,KLF2,MMP9,NOS3,PDE2A,PIP5K1C,PLCD3,PLXND1,RCAN1,RHOJ,SMO,TGFB1,THBD,TM4SF1,TNFRSF1A,ZEB1 | 25 |
| Cancer                                               | differentiated thyroid cancer        | 2.15E-06 | ADAMTS1,ANGPT2,CDKN1A,EPHB4,ITGA5,MMP9,RAP1GAP,TGFB1                                                                                                      | 8  |
| Endocrine System Disorders                           | differentiated thyroid cancer        | 2.15E-06 | ADAMTS1,ANGPT2,CDKN1A,EPHB4,ITGA5,MMP9,RAP1GAP,TGFB1                                                                                                      | 8  |
| Cardiovascular System Development and Function       | angiogenesis of tumor                | 2.33E-06 | ADAMTS1,ANGPTL4,MAP3K6,MMP9,TGFB1,THBD,WISP1                                                                                                              | 7  |
| Cancer                                               | angiogenesis of tumor                | 2.33E-06 | ADAMTS1,ANGPTL4,MAP3K6,MMP9,TGFB1,THBD,WISP1                                                                                                              | 7  |

|                                                |                                        |          |                                                                                                                                                                                                                                                                                                                   |    |
|------------------------------------------------|----------------------------------------|----------|-------------------------------------------------------------------------------------------------------------------------------------------------------------------------------------------------------------------------------------------------------------------------------------------------------------------|----|
| Cellular Assembly and Organization             | organization of cytoskeleton           | 2.57E-06 | ANGPT2,ANGPTL4,AQP5,CDKN1A,CHL1,CYR61,DOK1,ELMO1,FLNC,FSCN1 (includes EG:14086),GRASP,GRK5,HAP1 (includes EG:15114),HNF4A,KLF2,PIP5K1C,PLXND1,PVRL3,RANBP1,RAP1GAP,RHOJ,SEMA7A,TGFB1,TM4SF1,TNFRSF1A,UGCG,VWF                                                                                                     | 27 |
| Cellular Function and Maintenance              | organization of cytoskeleton           | 2.57E-06 | ANGPT2,ANGPTL4,AQP5,CDKN1A,CHL1,CYR61,DOK1,ELMO1,FLNC,FSCN1 (includes EG:14086),GRASP,GRK5,HAP1 (includes EG:15114),HNF4A,KLF2,PIP5K1C,PLXND1,PVRL3,RANBP1,RAP1GAP,RHOJ,SEMA7A,TGFB1,TM4SF1,TNFRSF1A,UGCG,VWF                                                                                                     | 27 |
| Cardiovascular System Development and Function | adhesion of vascular endothelial cells | 3.00E-06 | ANGPT2,CYR61,EGFL7,PECAM1,PLXND1,RCAN1,TGFB1                                                                                                                                                                                                                                                                      | 7  |
| Tissue Development                             | adhesion of vascular endothelial cells | 3.00E-06 | ANGPT2,CYR61,EGFL7,PECAM1,PLXND1,RCAN1,TGFB1                                                                                                                                                                                                                                                                      | 7  |
| Cell-To-Cell Signaling and Interaction         | adhesion of vascular endothelial cells | 3.00E-06 | ANGPT2,CYR61,EGFL7,PECAM1,PLXND1,RCAN1,TGFB1                                                                                                                                                                                                                                                                      | 7  |
| Tissue Development                             | clustering of cells                    | 3.11E-06 | CDKN1A,PECAM1,TGFB1,THBD,TNFRSF1A                                                                                                                                                                                                                                                                                 | 5  |
| Cancer                                         | neoplasia of tumor cell lines          | 4.09E-06 | ADAMTS1,ANGPT2,ANGPTL4,CAMK2N2,CDKN1A,CYR61,NOS3,TGFB1,THBD,WISP1                                                                                                                                                                                                                                                 | 10 |
| Cancer                                         | epithelial tumor                       | 4.37E-06 | ADAM9,ADAMTS1,ANGPT2,ANGPTL4,ANO6,ANXA4,ASPH,CAMK2N2,CDKN1A,CP,CYR61,DAB2,DOK1,EGFL7,ELMO1,EPHB4,FBLN2,FLNC,FRZB,FSCN1 (includes EG:14086),H19,HBEGF,HNF4A,IFITM1,ITGA5,KCNK6,KLF2,MMP9,NDRG2,NES,NOS3,PDE2A,PECAM1,PLLP,PVRL3,RAP1GAP,SLC12A8,SMO,SPARCL1,TGFB1,THBD,TM4SF1,TNFRSF1A,TSHZ3,TUBA1A,VWF,WISP1,ZEB1 | 48 |
| Cancer                                         | solid tumor                            | 4.77E-06 | ADAM9,ADAMTS1,ANGPT2,ANGPTL4,ANO6,ANXA4,ASPH,CAMK2N2,CDKN1A,CHL1,CP,CYR61,DAB2,DOK1,EGFL7,EPHB4,FBLN2,FLNC,FRZB,FSCN1 (includes EG:14086),H19,HBEGF,HNF4A,IFITM1,ITGA5,KCNK6,KLF2,MMP9,NES,NOS3,PDE2A,PECAM1,PLLP,PVRL3,RAP1GAP,SLC12A8,SMO,SPARCL1,TGFB1,THBD,TM4SF1,TNFRSF1A,TSHZ3,TUBA1A,VWF,WISP1,ZEB1        | 47 |
| Cancer                                         | carcinoma                              | 5.23E-06 | ADAM9,ADAMTS1,ANGPT2,ANGPTL4,ANO6,ANXA4,ASPH,CAMK2N2,CDKN1A,CP,CYR61,DAB2,DOK1,EGFL7,EPHB4,FBLN2,FLNC,FRZB,FSCN1 (includes EG:14086),H19,HBEGF,HNF4A,IFITM1,ITGA5,KCNK6,KLF2,MMP9,NES,NOS3,PDE2A,PECAM1,PLLP,PVRL3,RAP1GAP,SLC12A8,SMO,SPARCL1,TGFB1,THBD,TM4SF1,TNFRSF1A,TSHZ3,TUBA1A,VWF,WISP1,ZEB1             | 46 |
| Cardiovascular System Development and Function | adhesion of endothelial cells          | 6.67E-06 | ANGPT2,CYR61,EGFL7,PECAM1,PLXND1,RCAN1,TGFB1,THBD                                                                                                                                                                                                                                                                 | 8  |
| Tissue Development                             | adhesion of endothelial cells          | 6.67E-06 | ANGPT2,CYR61,EGFL7,PECAM1,PLXND1,RCAN1,TGFB1,THBD                                                                                                                                                                                                                                                                 | 8  |

|                                                |                                      |          |                                                                                                                                                                                                                  |    |
|------------------------------------------------|--------------------------------------|----------|------------------------------------------------------------------------------------------------------------------------------------------------------------------------------------------------------------------|----|
| Cell-To-Cell Signaling and Interaction         | adhesion of endothelial cells        | 6.67E-06 | ANGPT2,CYR61,EGFL7,PECAM1,PLXND1,RCAN1,TGFB1,THBD                                                                                                                                                                | 8  |
| Cardiovascular System Development and Function | development of cardiovascular tissue | 8.05E-06 | ADAMTS1,ANGPT2,ANGPTL4,CDKN1A,CYR61,DAB2,EPHB4,KLF2,MMP9,PDE2A,PIP5K1C,RCAN1,TGFB1                                                                                                                               | 13 |
| Tissue Development                             | development of cardiovascular tissue | 8.05E-06 | ADAMTS1,ANGPT2,ANGPTL4,CDKN1A,CYR61,DAB2,EPHB4,KLF2,MMP9,PDE2A,PIP5K1C,RCAN1,TGFB1                                                                                                                               | 13 |
| Cancer                                         | metastasis of lung                   | 9.10E-06 | ADAMTS1,ANGPTL4,CYR61,EGFL7,THBD                                                                                                                                                                                 | 5  |
| Organ Development                              | metastasis of lung                   | 9.10E-06 | ADAMTS1,ANGPTL4,CYR61,EGFL7,THBD                                                                                                                                                                                 | 5  |
| Respiratory Disease                            | metastasis of lung                   | 9.10E-06 | ADAMTS1,ANGPTL4,CYR61,EGFL7,THBD                                                                                                                                                                                 | 5  |
| Cancer                                         | thyroid carcinoma                    | 9.88E-06 | ADAMTS1,ANGPT2,CDKN1A,EPHB4,ITGA5,MMP9,RAP1GAP,TGFB1                                                                                                                                                             | 8  |
| Endocrine System Disorders                     | thyroid carcinoma                    | 9.88E-06 | ADAMTS1,ANGPT2,CDKN1A,EPHB4,ITGA5,MMP9,RAP1GAP,TGFB1                                                                                                                                                             | 8  |
| Cardiovascular System Development and Function | endothelial cell development         | 1.04E-05 | ADAMTS1,ANGPT2,ANGPTL4,CDKN1A,CYR61,DAB2,EPHB4,KLF2,MMP9,PDE2A,RCAN1,TGFB1                                                                                                                                       | 12 |
| Organismal Development                         | endothelial cell development         | 1.04E-05 | ADAMTS1,ANGPT2,ANGPTL4,CDKN1A,CYR61,DAB2,EPHB4,KLF2,MMP9,PDE2A,RCAN1,TGFB1                                                                                                                                       | 12 |
| Tissue Development                             | endothelial cell development         | 1.04E-05 | ADAMTS1,ANGPT2,ANGPTL4,CDKN1A,CYR61,DAB2,EPHB4,KLF2,MMP9,PDE2A,RCAN1,TGFB1                                                                                                                                       | 12 |
| Cellular Development                           | endothelial cell development         | 1.04E-05 | ADAMTS1,ANGPT2,ANGPTL4,CDKN1A,CYR61,DAB2,EPHB4,KLF2,MMP9,PDE2A,RCAN1,TGFB1                                                                                                                                       | 12 |
| Cell Death and Survival                        | cell death of endothelial cells      | 1.13E-05 | ANGPT2,CDKN1A,KLF2,MMP9,NOS3,PECAM1,TGFB1,THBD,TNFRSF1A                                                                                                                                                          | 9  |
| Cellular Assembly and Organization             | microtubule dynamics                 | 1.63E-05 | ANGPT2,ANGPTL4,AQP5,CDKN1A,CHL1,CYR61,DOK1,ELMO1,GRASP,GRK5,HAP1 (includes EG:15114),HNF4A,KLF2,PIP5K1C,PLXND1,PVRL3,RANBP1,RAP1GAP,SEMA7A,TGFB1,TM4SF1,TNFRSF1A,UGCG                                            | 23 |
| Cellular Function and Maintenance              | microtubule dynamics                 | 1.63E-05 | ANGPT2,ANGPTL4,AQP5,CDKN1A,CHL1,CYR61,DOK1,ELMO1,GRASP,GRK5,HAP1 (includes EG:15114),HNF4A,KLF2,PIP5K1C,PLXND1,PVRL3,RANBP1,RAP1GAP,SEMA7A,TGFB1,TM4SF1,TNFRSF1A,UGCG                                            | 23 |
| Cellular Movement                              | cell movement of tumor cell lines    | 1.65E-05 | ADAM9,ANGPT2,CYR61,DAB2,ELMO1,FLNC,FSCN1 (includes EG:14086),GIPC1,HBEGF,ITGA5,KANK1,MMP9,NES,PECAM1,RAP1GAP,TGFB1,THBD,WISP1                                                                                    | 18 |
| Cellular Movement                              | invasion of tumor cell lines         | 1.74E-05 | ADAM9,ADAMTS1,DAB2,ELMO1,EPHB4,FSCN1 (includes EG:14086),GIPC1,HBEGF,ITGA5,MMP9,NES,RAP1GAP,TGFB1,WISP1,ZEB1                                                                                                     | 15 |
| Cellular Development                           | proliferation of tumor cell lines    | 1.91E-05 | ADAMTS1,ANGPTL4,BIN1,CAMK2N2,CDKN1A,CREM (includes EG:12916),CYR61,DAB2,DBC1,FBLN2,FSCN1 (includes EG:14086),HBEGF,HNF4A,ITGA5,KLF2,MMP9,NDRG2,PECAM1,RAP1GAP,RGS16,SMO,TCN2,TGFB1,THBD,TNFRSF1A,UGCG,WISP1,ZEB1 | 28 |

|                                                |                                          |          |                                                                                                                                                                                                                                                                                                                                                                |    |
|------------------------------------------------|------------------------------------------|----------|----------------------------------------------------------------------------------------------------------------------------------------------------------------------------------------------------------------------------------------------------------------------------------------------------------------------------------------------------------------|----|
|                                                |                                          |          | ADAMTS1,ANGPTL4,BIN1,CAMK2N2,CDKN1A,CREM (includes EG:12916),CYR61,DAB2,DBC1,FBLN2,FSCN1 (includes EG:14086),HBEGF,HNF4A,ITGA5,KLF2,MMP9,NDRG2,PECAM1,RAP1GAP,RGS16,SMO,TCN2,TGFB1,THBD, TNFRSF1A,UGCG,WISP1,ZEB1                                                                                                                                              | 28 |
| Cellular Growth and Proliferation              | proliferation of tumor cell lines        | 1.91E-05 |                                                                                                                                                                                                                                                                                                                                                                |    |
| Embryonic Development                          | tubulogenesis                            | 1.94E-05 | CYR61,DAB2,HBEGF,MMP9,TGFB1                                                                                                                                                                                                                                                                                                                                    | 5  |
| Cellular Development                           | differentiation of epithelial cell lines | 2.23E-05 | DAB2,FSCN1 (includes EG:14086),TGFB1,ZEB1                                                                                                                                                                                                                                                                                                                      | 4  |
| Hair and Skin Development and Function         | differentiation of epithelial cell lines | 2.23E-05 | DAB2,FSCN1 (includes EG:14086),TGFB1,ZEB1                                                                                                                                                                                                                                                                                                                      | 4  |
| Cellular Function and Maintenance              | permeability of cells                    | 2.28E-05 | ANGPT2,NOS3,PECAM1,RAP1GAP,THBD,ZEB1                                                                                                                                                                                                                                                                                                                           | 6  |
| Cell Morphology                                | permeability of cells                    | 2.28E-05 | ANGPT2,NOS3,PECAM1,RAP1GAP,THBD,ZEB1                                                                                                                                                                                                                                                                                                                           | 6  |
| Cardiovascular Disease                         | aneurysm                                 | 2.43E-05 | ANGPT2,KLF2,MMP9,NOS3,RCAN1                                                                                                                                                                                                                                                                                                                                    | 5  |
| Cellular Movement                              | extravasation                            | 2.46E-05 | ANGPT2,HDC,NOS3,PECAM1,RAP1GAP,ST3GAL4 ADAM9,ADAMTS1,ANGPT2,CDKN1A,ELMO1,EPHB4, FBLN2,FRZB,ITGA5,MMP9,NES,RAP1GAP,SMO,SPAR CL1,TGFB1,TNFRSF1A,TUBA1A                                                                                                                                                                                                           | 6  |
| Cancer                                         | head and neck cancer                     | 2.77E-05 |                                                                                                                                                                                                                                                                                                                                                                | 17 |
| Molecular Transport                            | transport of Na+                         | 2.86E-05 | CNKSR3,NDRG2,NOS3,SLC20A1,SLC5A5,TGFB1                                                                                                                                                                                                                                                                                                                         | 6  |
| Renal and Urological Disease                   | proteinuria                              | 2.96E-05 | CDKN1A,EHD3,GIPC1,HBEGF,NOS3,TGFB1,THBD,VWF                                                                                                                                                                                                                                                                                                                    | 8  |
| Cellular Movement                              | migration of tumor cell lines            | 3.62E-05 | ANGPT2,CYR61,DAB2,ELMO1,FLNC,FSCN1 (includes EG:14086),GIPC1,HBEGF,ITGA5,KANK1,MMP9,NES,PECAM1,RAP1GAP,TGFB1                                                                                                                                                                                                                                                   | 15 |
| Cardiovascular Disease                         | heart disease                            | 3.86E-05 | ANGPT2,ASPH,BIN1,CDKN1A,CREM (includes EG:12916),DYSF,GRK5,HBEGF,ITGA5,KLF2,MMP9,NOS3,PDE4B,PECAM1,PLXND1,RCAN1,TGFB1,THBD,TNFRSF1A,TUBA1A,VWF                                                                                                                                                                                                                 | 21 |
| Cellular Growth and Proliferation              | proliferation of cells                   | 4.03E-05 | ADAMTS1,ANGPT2,ANGPTL4,APBB2,ASPH,BIN1,CAMK2N2,CDKN1A,CREM (includes EG:12916),CYR61,DAB2,DBC1,DOK1,EPHB4,FBLN2,FRZB,FSCN1 (includes EG:14086),GIPC1,GRASP,GRK5,H19,HBEGF,HNF4A,HS3B7,IFITM1,ITGA5,KLF2,LRRK2,MMP9,NDRG2,NES,NOS3,PDE2A,PECAM1,PIP5K1C,PLCD3,RAP1GAP,RCAN1,RGS16,SERPINH1,SLC20A1,SMO,SOX7,TCN2,TGFB1,THBD,TNFRSF1A,UGCG,VWF,WISP1,ZBTB32,ZEB1 | 52 |
| Cardiovascular System Development and Function | vascularization of eye                   | 4.09E-05 | ADAM9,ADAMTS1,CYR61,MMP9,NOS3,TNFRSF1A                                                                                                                                                                                                                                                                                                                         | 6  |
| Organismal Development                         | vascularization of eye                   | 4.09E-05 | ADAM9,ADAMTS1,CYR61,MMP9,NOS3,TNFRSF1A                                                                                                                                                                                                                                                                                                                         | 6  |
| Visual System Development and Function         | vascularization of eye                   | 4.09E-05 | ADAM9,ADAMTS1,CYR61,MMP9,NOS3,TNFRSF1A                                                                                                                                                                                                                                                                                                                         | 6  |
| Cellular Movement                              | migration of vascular endothelial cells  | 4.46E-05 | ADAMTS1,ANGPT2,KLF2,MMP9,PDE2A,PLXND1,TGFB1                                                                                                                                                                                                                                                                                                                    | 7  |

|                                                              |                                           |          |                                                                                                                                            |    |
|--------------------------------------------------------------|-------------------------------------------|----------|--------------------------------------------------------------------------------------------------------------------------------------------|----|
| Cardiovascular System<br>Development and<br>Function         | migration of vascular endothelial cells   | 4.46E-05 | ADAMTS1,ANGPT2,KLF2,MMP9,PDE2A,PLXND1,TGF<br>B1                                                                                            | 7  |
| Cell Death and Survival                                      | cell death of bladder cancer cell lines   | 4.46E-05 | CDKN1A,DBC1,HBEGF,NOS3                                                                                                                     | 4  |
| Cell Death and Survival                                      | apoptosis of breast cell lines            | 4.50E-05 | CDKN1A,DAB2,ITGA5,TGFB1,ZEB1                                                                                                               | 5  |
| Tissue Development                                           | clustering of dendritic cells             | 5.20E-05 | PECAM1,TGFB1,TNFRSF1A                                                                                                                      | 3  |
| Cell-To-Cell Signaling<br>and Interaction                    | clustering of dendritic cells             | 5.20E-05 | PECAM1,TGFB1,TNFRSF1A                                                                                                                      | 3  |
| Hematological System<br>Development and<br>Function          | clustering of dendritic cells             | 5.20E-05 | PECAM1,TGFB1,TNFRSF1A                                                                                                                      | 3  |
| Immune Cell<br>Trafficking                                   | clustering of dendritic cells             | 5.20E-05 | PECAM1,TGFB1,TNFRSF1A                                                                                                                      | 3  |
| Inflammatory<br>Response                                     | clustering of dendritic cells             | 5.20E-05 | PECAM1,TGFB1,TNFRSF1A                                                                                                                      | 3  |
| Gastrointestinal<br>Disease                                  | chronic viral hepatitis                   | 5.93E-05 | MMP9,TGFB1                                                                                                                                 | 2  |
| Hepatic System<br>Disease                                    | chronic viral hepatitis                   | 5.93E-05 | MMP9,TGFB1                                                                                                                                 | 2  |
| Infectious Disease                                           | chronic viral hepatitis                   | 5.93E-05 | MMP9,TGFB1                                                                                                                                 | 2  |
| Inflammatory Disease                                         | chronic viral hepatitis                   | 5.93E-05 | MMP9,TGFB1                                                                                                                                 | 2  |
| Renal and Urological<br>Disease                              | dedifferentiation of kidney cell lines    | 5.93E-05 | HBEGF,PECAM1                                                                                                                               | 2  |
| Developmental<br>Disorder                                    | dedifferentiation of kidney cell lines    | 5.93E-05 | HBEGF,PECAM1<br>ANGPT2,CD93,CDKN1A,EGFL7,HDC,ITGA5,KLF2,LRRK<br>2,MMP9,NOS3,PDE4B,PECAM1,PIP5K1C,PLXND1,RA<br>P1GAP,ST3GAL4,TGFB1,TNFRSF1A | 2  |
| Cellular Movement                                            | cell movement of leukocytes               | 6.19E-05 | P1GAP,ST3GAL4,TGFB1,TNFRSF1A                                                                                                               | 18 |
| Hematological System<br>Development and<br>Function          | cell movement of leukocytes               | 6.19E-05 | ANGPT2,CD93,CDKN1A,EGFL7,HDC,ITGA5,KLF2,LRRK<br>2,MMP9,NOS3,PDE4B,PECAM1,PIP5K1C,PLXND1,RA<br>P1GAP,ST3GAL4,TGFB1,TNFRSF1A                 | 18 |
| Immune Cell<br>Trafficking                                   | cell movement of leukocytes               | 6.19E-05 | ANGPT2,CD93,CDKN1A,EGFL7,HDC,ITGA5,KLF2,LRRK<br>2,MMP9,NOS3,PDE4B,PECAM1,PIP5K1C,PLXND1,RA<br>P1GAP,ST3GAL4,TGFB1,TNFRSF1A                 | 18 |
| Cellular Development<br>Cellular Growth and<br>Proliferation | proliferation of breast cancer cell lines | 6.26E-05 | ADAMTS1,BIN1,CDKN1A,CYR61,DAB2,HBEGF,ITGA5,<br>PECAM1,RGS16,TGFB1,TNFRSF1A,ZEB1                                                            | 12 |
| Cellular Development                                         | proliferation of breast cancer cell lines | 6.26E-05 | ADAMTS1,BIN1,CDKN1A,CYR61,DAB2,HBEGF,ITGA5,<br>PECAM1,RGS16,TGFB1,TNFRSF1A,ZEB1                                                            | 12 |
| Cellular Development                                         | proliferation of carcinoma cell lines     | 7.10E-05 | CDKN1A,CYR61,DAB2,FBLN2,FSCN1 (includes<br>EG:14086),KLF2,RAP1GAP,TGFB1,TNFRSF1A,ZEB1                                                      | 10 |
| Cellular Growth and<br>Proliferation                         | proliferation of carcinoma cell lines     | 7.10E-05 | CDKN1A,CYR61,DAB2,FBLN2,FSCN1 (includes<br>EG:14086),KLF2,RAP1GAP,TGFB1,TNFRSF1A,ZEB1                                                      | 10 |
| Organismal<br>Development                                    | morphogenesis of kidney                   | 7.12E-05 | ADAMTS1,MMP9,TSHZ3                                                                                                                         | 3  |
| Tissue Development<br>Embryonic<br>Development               | morphogenesis of kidney                   | 7.12E-05 | ADAMTS1,MMP9,TSHZ3                                                                                                                         | 3  |
| Development                                                  | morphogenesis of kidney                   | 7.12E-05 | ADAMTS1,MMP9,TSHZ3                                                                                                                         | 3  |

|                                                            |                                    |          |                                                                                                                                                                                                                                   |    |
|------------------------------------------------------------|------------------------------------|----------|-----------------------------------------------------------------------------------------------------------------------------------------------------------------------------------------------------------------------------------|----|
| Organ Development                                          | morphogenesis of kidney            | 7.12E-05 | ADAMTS1,MMP9,TSHZ3                                                                                                                                                                                                                | 3  |
| Renal and Urological System Development and Function       | morphogenesis of kidney            | 7.12E-05 | ADAMTS1,MMP9,TSHZ3                                                                                                                                                                                                                | 3  |
| Organ Morphology                                           | morphogenesis of kidney            | 7.12E-05 | ADAMTS1,MMP9,TSHZ3                                                                                                                                                                                                                | 3  |
| Cellular Movement                                          | invasion of cells                  | 7.46E-05 | ADAM9,ADAMTS1,ANGPT2,CYR61,DAB2,ELMO1,EPHB4,FSCN1 (includes EG:14086),GIPC1,HBEGF,ITGA5,MMP9,NES,RAP1GAP,TGFB1,WISP1,ZEB1                                                                                                         | 17 |
| Cardiovascular System Development and Function             | proliferation of endothelial cells | 7.53E-05 | ADAMTS1,ANGPT2,ANGPTL4,CDKN1A,DAB2,EPHB4,KLF2,PDE2A,RCAN1,TGFB1                                                                                                                                                                   | 10 |
| Organismal Development                                     | proliferation of endothelial cells | 7.53E-05 | ADAMTS1,ANGPT2,ANGPTL4,CDKN1A,DAB2,EPHB4,KLF2,PDE2A,RCAN1,TGFB1                                                                                                                                                                   | 10 |
| Tissue Development                                         | proliferation of endothelial cells | 7.53E-05 | ADAMTS1,ANGPT2,ANGPTL4,CDKN1A,DAB2,EPHB4,KLF2,PDE2A,RCAN1,TGFB1                                                                                                                                                                   | 10 |
| Cellular Development                                       | proliferation of endothelial cells | 7.53E-05 | ADAMTS1,ANGPT2,ANGPTL4,CDKN1A,DAB2,EPHB4,KLF2,PDE2A,RCAN1,TGFB1                                                                                                                                                                   | 10 |
| Cellular Growth and Proliferation                          | proliferation of endothelial cells | 7.53E-05 | ADAMTS1,ANGPT2,ANGPTL4,CDKN1A,DAB2,EPHB4,KLF2,PDE2A,RCAN1,TGFB1                                                                                                                                                                   | 10 |
| Cellular Development                                       | proliferation of muscle cells      | 7.68E-05 | ANGPT2,CDKN1A,H19,HBEGF,ITGA5,MMP9,NDRG2,NOS3,TGFB1,THBD,TNFRSF1A                                                                                                                                                                 | 11 |
| Cellular Growth and Proliferation                          | proliferation of muscle cells      | 7.68E-05 | ANGPT2,CDKN1A,H19,HBEGF,ITGA5,MMP9,NDRG2,NOS3,TGFB1,THBD,TNFRSF1A                                                                                                                                                                 | 11 |
| Skeletal and Muscular System Development and Function      | proliferation of muscle cells      | 7.68E-05 | ANGPT2,CDKN1A,H19,HBEGF,ITGA5,MMP9,NDRG2,NOS3,TGFB1,THBD,TNFRSF1A                                                                                                                                                                 | 11 |
| Cardiovascular System Development and Function             | activation of endothelial cells    | 7.73E-05 | ANGPT2,HBEGF,MMP9,PECAM1,TGFB1                                                                                                                                                                                                    | 5  |
| Cell-To-Cell Signaling and Interaction                     | activation of endothelial cells    | 7.73E-05 | ANGPT2,HBEGF,MMP9,PECAM1,TGFB1                                                                                                                                                                                                    | 5  |
| Cardiovascular Disease Organismal Injury and Abnormalities | formation of aneurysm              | 7.98E-05 | ANGPT2,KLF2,MMP9,NOS3                                                                                                                                                                                                             | 4  |
|                                                            | formation of aneurysm              | 7.98E-05 | ANGPT2,KLF2,MMP9,NOS3<br>ANGPT2,CAMK2N2,CDKN1A,CREM (includes EG:12916),CYR61,DAB2,DBC1,EPHB4,FAIM2,HAP1 (includes EG:15114),HBEGF,ITGA5,KLF2,MMP9,NOS3,PDE4B,PECAM1,RAP1GAP,RGS16,SLC5A5,ST3GAL1,TGFB1,TNFRSF1A,TUBA1A,UGCG,ZEB1 | 4  |
| Cell Death and Survival Organismal Development             | cell death of tumor cell lines     | 7.98E-05 | FRSF1A,TUBA1A,UGCG,ZEB1                                                                                                                                                                                                           | 26 |
|                                                            | formation of vessel                | 8.31E-05 | ADAMTS1,ANGPT2,EPHB4,MMP9,NOS3,PDE2A                                                                                                                                                                                              | 6  |
| Tissue Development                                         | development of epithelial tissue   | 8.85E-05 | ADAMTS1,ANGPT2,ANGPTL4,CDKN1A,CYR61,DAB2,EPHB4,KLF2,MMP9,PDE2A,RCAN1,SERPINH1,TGFB1                                                                                                                                               | 13 |
| Tissue Development                                         | adhesion of mononuclear leukocytes | 8.89E-05 | ANGPT2,ITGA5,PECAM1,PIP5K1C,RAP1GAP,TGFB1,VWF                                                                                                                                                                                     | 7  |
| Cell-To-Cell Signaling and Interaction                     | adhesion of mononuclear leukocytes | 8.89E-05 | ANGPT2,ITGA5,PECAM1,PIP5K1C,RAP1GAP,TGFB1,VWF                                                                                                                                                                                     | 7  |

|                                                      |                                             |          |                                                                                                                                                                                                                                                                                        |    |
|------------------------------------------------------|---------------------------------------------|----------|----------------------------------------------------------------------------------------------------------------------------------------------------------------------------------------------------------------------------------------------------------------------------------------|----|
| Hematological System Development and Function        | adhesion of mononuclear leukocytes          | 8.89E-05 | ANGPT2,ITGA5,PECAM1,PIP5K1C,RAP1GAP,TGFB1,WF                                                                                                                                                                                                                                           | 7  |
| Immune Cell Trafficking                              | adhesion of mononuclear leukocytes          | 8.89E-05 | ANGPT2,ITGA5,PECAM1,PIP5K1C,RAP1GAP,TGFB1,WF                                                                                                                                                                                                                                           | 7  |
| Cancer                                               | metastasis of cells                         | 9.74E-05 | ADAMTS1,ANGPT2,ANGPTL4,MMP9,NOS3,WISP1,ZEB1                                                                                                                                                                                                                                            | 7  |
| Cell Death and Survival                              | necrosis                                    | 9.94E-05 | ANGPT2,CAMK2N2,CDKN1A,CHL1,CREM (includes EG:12916),CYR61,DAB2,DBC1,DYSF,EPHB4,FAIM2,FRZB,HAP1 (includes EG:15114),HBEGF,HNF4A,IRAK3,ITGA5,KLF2,LRRK2,MMP9,NOS3,PDE4B,PECAM1,RAP1GAP,RCAN1,RGS16,SEMA7A,SLC20A1,SLC5A5,ST3GAL1,STXBP1,TGFB1,THBD,TNFRSF1A,TSHZ3,TUBA1A,UGCG,WISP1,ZEB1 | 39 |
| Developmental Disorder                               | dedifferentiation of cells                  | 1.03E-04 | HBEGF,MMP9,PECAM1,TGFB1                                                                                                                                                                                                                                                                | 4  |
| Cellular Development                                 | proliferation of prostate cancer cell lines | 1.06E-04 | CDKN1A,CREM (includes EG:12916),DAB2,FSCN1 (includes EG:14086),HBEGF,MMP9,NDRG2,SMO,TGFB1                                                                                                                                                                                              | 9  |
| Cellular Growth and Proliferation                    | proliferation of prostate cancer cell lines | 1.06E-04 | CDKN1A,CREM (includes EG:12916),DAB2,FSCN1 (includes EG:14086),HBEGF,MMP9,NDRG2,SMO,TGFB1                                                                                                                                                                                              | 9  |
| Tissue Development                                   | adhesion of immune cells                    | 1.15E-04 | ADAM9,ANGPT2,ITGA5,NOS3,PECAM1,PIP5K1C,RAP1GAP,TGFB1,THBD,TNFRSF1A,VWF                                                                                                                                                                                                                 | 11 |
| Cell-To-Cell Signaling and Interaction               | adhesion of immune cells                    | 1.15E-04 | ADAM9,ANGPT2,ITGA5,NOS3,PECAM1,PIP5K1C,RAP1GAP,TGFB1,THBD,TNFRSF1A,VWF                                                                                                                                                                                                                 | 11 |
| Hematological System Development and Function        | adhesion of immune cells                    | 1.15E-04 | ADAM9,ANGPT2,ITGA5,NOS3,PECAM1,PIP5K1C,RAP1GAP,TGFB1,THBD,TNFRSF1A,VWF                                                                                                                                                                                                                 | 11 |
| Immune Cell Trafficking                              | adhesion of immune cells                    | 1.15E-04 | ADAM9,ANGPT2,ITGA5,NOS3,PECAM1,PIP5K1C,RAP1GAP,TGFB1,THBD,TNFRSF1A,VWF                                                                                                                                                                                                                 | 11 |
| Renal and Urological Disease                         | albuminuria                                 | 1.16E-04 | HBEGF,NOS3,TGFB1,THBD,VWF                                                                                                                                                                                                                                                              | 5  |
| Metabolic Disease                                    | albuminuria                                 | 1.16E-04 | HBEGF,NOS3,TGFB1,THBD,VWF                                                                                                                                                                                                                                                              | 5  |
| Organismal Development                               | mass of kidney                              | 1.16E-04 | CDKN1A,EHD3,H19,LRRK2,NOS3                                                                                                                                                                                                                                                             | 5  |
| Tissue Development Embryonic                         | mass of kidney                              | 1.16E-04 | CDKN1A,EHD3,H19,LRRK2,NOS3                                                                                                                                                                                                                                                             | 5  |
| Development                                          | mass of kidney                              | 1.16E-04 | CDKN1A,EHD3,H19,LRRK2,NOS3                                                                                                                                                                                                                                                             | 5  |
| Organ Development                                    | mass of kidney                              | 1.16E-04 | CDKN1A,EHD3,H19,LRRK2,NOS3                                                                                                                                                                                                                                                             | 5  |
| Renal and Urological System Development and Function | mass of kidney                              | 1.16E-04 | CDKN1A,EHD3,H19,LRRK2,NOS3                                                                                                                                                                                                                                                             | 5  |
| Organ Morphology                                     | mass of kidney                              | 1.16E-04 | CDKN1A,EHD3,H19,LRRK2,NOS3                                                                                                                                                                                                                                                             | 5  |
| Cell Morphology                                      | sprouting                                   | 1.21E-04 | ADAMTS1,ANGPT2,CDKN1A,CYR61,ELMO1,EPHB4,GASP,NOS3,TGFB1,UGCG                                                                                                                                                                                                                           | 10 |
| Cell-To-Cell Signaling and Interaction               | binding of bone marrow cells                | 1.22E-04 | ITGA5,PECAM1,RAP1GAP                                                                                                                                                                                                                                                                   | 3  |

|                                                |                                         |          |                                                                                                                                                                                                                                                                                                                       |    |
|------------------------------------------------|-----------------------------------------|----------|-----------------------------------------------------------------------------------------------------------------------------------------------------------------------------------------------------------------------------------------------------------------------------------------------------------------------|----|
| Cellular Movement                              | recruitment of leukocytes               | 1.28E-04 | ANGPT2,CD93,HDC,MMP9,NOS3,PDE4B,PIP5K1C,TGFB1,TNFRSF1A,VWF                                                                                                                                                                                                                                                            | 10 |
| Cell-To-Cell Signaling and Interaction         | recruitment of leukocytes               | 1.28E-04 | ANGPT2,CD93,HDC,MMP9,NOS3,PDE4B,PIP5K1C,TGFB1,TNFRSF1A,VWF                                                                                                                                                                                                                                                            | 10 |
| Hematological System Development and Function  | recruitment of leukocytes               | 1.28E-04 | ANGPT2,CD93,HDC,MMP9,NOS3,PDE4B,PIP5K1C,TGFB1,TNFRSF1A,VWF                                                                                                                                                                                                                                                            | 10 |
| Immune Cell Trafficking                        | recruitment of leukocytes               | 1.28E-04 | ANGPT2,CD93,HDC,MMP9,NOS3,PDE4B,PIP5K1C,TGFB1,TNFRSF1A,VWF                                                                                                                                                                                                                                                            | 10 |
| Cancer                                         | Cancer                                  | 1.28E-04 | ADAM9,ADAMTS1,ANGPT2,ANGPTL4,ANO6,ANXA4,ASPH,CAMK2N2,CDKN1A,CHL1,CP,CYR61,DAB2,DOK1,EGFL7,ELMO1,EPHB4,FBLN2,FLNC,FRZB,FSCN1 (includes EG:14086),GIPC1,H19,HBEGF,HNF4A,IFITM1,ITGA5,KCNK6,KLF2,MMP9,NES,NOS3,PDE2A,PDE4B,PECAM1,PLLP,PVRL3,RANBP1,RAP1GAP,RGS16,SLC12A8,SMO,SOX7,SPARCL1,TGFB1,THBD,TM4SF1,TNFRSF1A,TS | 55 |
| Cardiovascular Disease                         | hypertension                            | 1.31E-04 | HZ3,TUBA1A,TUBB6,UGCG,VWF,WISP1,ZEB1<br>ANGPT2,CSGALNACT1,MMP9,NOS3,PDE4B,PRELID2,RHOJ,TGFB1,THBD,VWF                                                                                                                                                                                                                 | 10 |
| Organismal Development                         | size of body                            | 1.33E-04 | ADAMTS1,ANGPTL4,APBB2,AQP5,BACE2,CDKN1A,CSGALNACT1,DOK1,EHD3,H19,HAP1 (includes EG:15114),HBEGF,IRAK3,MMP9,NES,NOS3,RANBP1,RCAN1,TGFB1,TNFRSF1A                                                                                                                                                                       | 20 |
| Cellular Movement                              | leukocyte migration                     | 1.36E-04 | ANGPT2,CD93,CDKN1A,EGFL7,HDC,ITGA5,KLF2,LRRK2,MMP9,NOS3,PDE4B,PECAM1,PIP5K1C,PLXND1,RA                                                                                                                                                                                                                                | 19 |
| Immune Cell Trafficking                        | leukocyte migration                     | 1.36E-04 | P1GAP,ST3GAL4,TGFB1,TNFRSF1A,VWF<br>ANGPT2,CD93,CDKN1A,EGFL7,HDC,ITGA5,KLF2,LRRK2,MMP9,NOS3,PDE4B,PECAM1,PIP5K1C,PLXND1,RA                                                                                                                                                                                            | 19 |
| Cellular Movement                              | migration of neutrophils                | 1.46E-04 | MMP9,PDE4B,PECAM1,ST3GAL4,TGFB1,TNFRSF1A                                                                                                                                                                                                                                                                              | 6  |
| Hematological System Development and Function  | migration of neutrophils                | 1.46E-04 | MMP9,PDE4B,PECAM1,ST3GAL4,TGFB1,TNFRSF1A                                                                                                                                                                                                                                                                              | 6  |
| Immune Cell Trafficking                        | migration of neutrophils                | 1.46E-04 | MMP9,PDE4B,PECAM1,ST3GAL4,TGFB1,TNFRSF1A                                                                                                                                                                                                                                                                              | 6  |
| Inflammatory Response                          | migration of neutrophils                | 1.46E-04 | MMP9,PDE4B,PECAM1,ST3GAL4,TGFB1,TNFRSF1A                                                                                                                                                                                                                                                                              | 6  |
| Cellular Movement                              | homing of cells                         | 1.49E-04 | ANGPT2,CDKN1A,CYR61,HBEGF,ITGA5,LRRK2,MMP9,NOS3,PDE4B,PIP5K1C,RAP1GAP,TGFB1,THBD,TNFRSF1A                                                                                                                                                                                                                             | 14 |
| Cardiovascular System Development and Function | morphology of cardiovascular system     | 1.54E-04 | ADAM9,BIN1,EHD3,H19,HBEGF,ITGA5,KLF2,MMP9,NOS3,PLXND1,SERPINH1,SLCO2A1,TGFB1,THBD,VWF,ZEB1                                                                                                                                                                                                                            | 16 |
| Cell Death and Survival                        | cell death of ovarian cancer cell lines | 1.54E-04 | CAMK2N2,CDKN1A,DAB2,KLF2,TNFRSF1A,UGCG                                                                                                                                                                                                                                                                                | 6  |
| Cellular Development                           | proliferation of smooth muscle cells    | 1.62E-04 | ANGPT2,CDKN1A,HBEGF,MMP9,NDRG2,NOS3,TGFB1,THBD,TNFRSF1A                                                                                                                                                                                                                                                               | 9  |



|                                                       |                                                 |          |                                                                                                                                                                                                                                                                                                                                     |    |
|-------------------------------------------------------|-------------------------------------------------|----------|-------------------------------------------------------------------------------------------------------------------------------------------------------------------------------------------------------------------------------------------------------------------------------------------------------------------------------------|----|
| Cellular Growth and Proliferation                     | proliferation of smooth muscle cells            | 1.62E-04 | ANGPT2,CDKN1A,HBEGF,MMP9,NDRG2,NOS3,TGFB1,THBD,TNFRSF1A                                                                                                                                                                                                                                                                             | 9  |
| Skeletal and Muscular System Development and Function | proliferation of smooth muscle cells            | 1.62E-04 | ANGPT2,CDKN1A,HBEGF,MMP9,NDRG2,NOS3,TGFB1,THBD,TNFRSF1A                                                                                                                                                                                                                                                                             | 9  |
| Cellular Movement                                     | transmigration of monocytes                     | 1.66E-04 | MMP9,PECAM1,TGFB1,TNFRSF1A                                                                                                                                                                                                                                                                                                          | 4  |
| Hematological System Development and Function         | transmigration of monocytes                     | 1.66E-04 | MMP9,PECAM1,TGFB1,TNFRSF1A                                                                                                                                                                                                                                                                                                          | 4  |
| Immune Cell Trafficking                               | transmigration of monocytes                     | 1.66E-04 | MMP9,PECAM1,TGFB1,TNFRSF1A                                                                                                                                                                                                                                                                                                          | 4  |
| Inflammatory Response                                 | transmigration of monocytes                     | 1.66E-04 | MMP9,PECAM1,TGFB1,TNFRSF1A                                                                                                                                                                                                                                                                                                          | 4  |
| Cell-To-Cell Signaling and Interaction                | activation of neural precursor cells            | 1.77E-04 | ANGPT2,CDKN1A                                                                                                                                                                                                                                                                                                                       | 2  |
| Gastrointestinal Disease                              | alcoholic cirrhosis                             | 1.77E-04 | MMP9,TGFB1                                                                                                                                                                                                                                                                                                                          | 2  |
| Hepatic System Disease                                | alcoholic cirrhosis                             | 1.77E-04 | MMP9,TGFB1                                                                                                                                                                                                                                                                                                                          | 2  |
| Organismal Injury and Abnormalities                   | alcoholic cirrhosis                             | 1.77E-04 | MMP9,TGFB1                                                                                                                                                                                                                                                                                                                          | 2  |
| Cellular Movement                                     | cell movement of keratinocyte cancer cell lines | 1.77E-04 | ADAM9,THBD                                                                                                                                                                                                                                                                                                                          | 2  |
| Cellular Growth and Proliferation                     | cytostasis of keratinocytes                     | 1.77E-04 | CDKN1A,TGFB1                                                                                                                                                                                                                                                                                                                        | 2  |
| Hair and Skin Development and Function                | cytostasis of keratinocytes                     | 1.77E-04 | CDKN1A,TGFB1                                                                                                                                                                                                                                                                                                                        | 2  |
| Tissue Development Embryonic                          | differentiation of visceral endoderm            | 1.77E-04 | DAB2,TGFB1                                                                                                                                                                                                                                                                                                                          | 2  |
| Development                                           | differentiation of visceral endoderm            | 1.77E-04 | DAB2,TGFB1                                                                                                                                                                                                                                                                                                                          | 2  |
| Cellular Development                                  | differentiation of visceral endoderm            | 1.77E-04 | DAB2,TGFB1                                                                                                                                                                                                                                                                                                                          | 2  |
| Cellular Function and Maintenance                     | permeability of podocytes                       | 1.77E-04 | ANGPT2,ZEB1                                                                                                                                                                                                                                                                                                                         | 2  |
| Cell Morphology                                       | permeability of podocytes                       | 1.77E-04 | ANGPT2,ZEB1                                                                                                                                                                                                                                                                                                                         | 2  |
| Cardiovascular System Development and Function        | vascularization                                 | 1.86E-04 | ADAM9,ADAMTS1,CYR61,MMP9,NOS3,PLCD3,TGFB1,TNFRSF1A                                                                                                                                                                                                                                                                                  | 8  |
| Cell Death and Survival                               | cell death                                      | 1.88E-04 | ANGPT2,ANGPTL4,APBB2,BIN1,CAMK2N2,CDKN1A,CHL1,CP,CREM (includes EG:12916),CYR61,DAB2,DBC1,DYSF,ELMO1,EPHB4,FAIM2,FRZB,HAP1 (includes EG:15114),HBEGF,HNF4A,IRAK3,ITGA5,KLF2,LRRK2,MMP9,NOS3,PDE4B,PECAM1,PLCD3,RANBP1,RAP1GAP,RCAN1,RGS16,SEMA7A,SLC20A1,SLC5A5,SMO,ST3GAL1,STXBP1,TGFB1,THBD,TNFRSF1A,TSHZ3,TUBA1A,UGCG,WISP1,ZEB1 | 47 |
| Tissue Development                                    | aggregation of blood cells                      | 2.12E-04 | DAB2,HDC,NOS3,PECAM1,STXBP1,TGFB1,TNFRSF1A,VWF                                                                                                                                                                                                                                                                                      | 8  |

|                                        |                                                                              |          |                                                                                                                                                                     |    |
|----------------------------------------|------------------------------------------------------------------------------|----------|---------------------------------------------------------------------------------------------------------------------------------------------------------------------|----|
| Hematological System                   |                                                                              |          |                                                                                                                                                                     |    |
| Development and                        |                                                                              |          | DAB2,HDC,NOS3,PECAM1,STXBP1,TGFB1,TNFRSF1A,                                                                                                                         |    |
| Function                               | aggregation of blood cells                                                   | 2.12E-04 | VWF                                                                                                                                                                 | 8  |
| Cancer                                 | hyperplasia of skin                                                          | 2.20E-04 | HBEGF,MMP9,SMO,TGFB1,TNFRSF1A                                                                                                                                       | 5  |
| Dermatological                         |                                                                              |          |                                                                                                                                                                     |    |
| Diseases and                           |                                                                              |          |                                                                                                                                                                     |    |
| Conditions                             | hyperplasia of skin                                                          | 2.20E-04 | HBEGF,MMP9,SMO,TGFB1,TNFRSF1A                                                                                                                                       | 5  |
| Gastrointestinal                       |                                                                              |          |                                                                                                                                                                     |    |
| Disease                                | alcoholic liver disease                                                      | 2.27E-04 | MMP9,PDE4B,TGFB1,TNFRSF1A                                                                                                                                           | 4  |
| Hepatic System                         |                                                                              |          |                                                                                                                                                                     |    |
| Disease                                | alcoholic liver disease                                                      | 2.27E-04 | MMP9,PDE4B,TGFB1,TNFRSF1A                                                                                                                                           | 4  |
| Renal and Urological                   |                                                                              |          |                                                                                                                                                                     |    |
| Disease                                | membranous glomerulonephritis                                                | 2.35E-04 | CDKN1A,HBEGF,TGFB1                                                                                                                                                  | 3  |
| Inflammatory                           |                                                                              |          |                                                                                                                                                                     |    |
| Response                               | membranous glomerulonephritis                                                | 2.35E-04 | CDKN1A,HBEGF,TGFB1                                                                                                                                                  | 3  |
| Inflammatory Disease                   | membranous glomerulonephritis                                                | 2.35E-04 | CDKN1A,HBEGF,TGFB1                                                                                                                                                  | 3  |
| Immunological                          |                                                                              |          |                                                                                                                                                                     |    |
| Disease                                | membranous glomerulonephritis                                                | 2.35E-04 | CDKN1A,HBEGF,TGFB1                                                                                                                                                  | 3  |
|                                        |                                                                              |          |                                                                                                                                                                     |    |
| Cancer                                 | colorectal cancer                                                            | 2.49E-04 | ADAMTS1,ANGPT2,ANGPTL4,ANXA4,CDKN1A,CYR61,EGFL7,EPHB4,FSCN1 (includes EG:14086),HNF4A,IFITM1,MMP9,PECAM1,PVRL3,RA P1GAP,SLC12A8,SMO,TGFB1,TM4SF1,WISP1              | 20 |
|                                        |                                                                              |          |                                                                                                                                                                     |    |
| Gastrointestinal                       |                                                                              |          |                                                                                                                                                                     |    |
| Disease                                | colorectal cancer                                                            | 2.49E-04 | ADAMTS1,ANGPT2,ANGPTL4,ANXA4,CDKN1A,CYR61,EGFL7,EPHB4,FSCN1 (includes EG:14086),HNF4A,IFITM1,MMP9,PECAM1,PVRL3,RA P1GAP,SLC12A8,SMO,TGFB1,TM4SF1,WISP1              | 20 |
|                                        |                                                                              |          |                                                                                                                                                                     |    |
| Cancer                                 | gastrointestinal tract cancer                                                | 2.51E-04 | ADAM9,ADAMTS1,ANGPT2,ANGPTL4,ANXA4,CDKN1A,CYR61,EGFL7,EPHB4,FSCN1 (includes EG:14086),HNF4A,IFITM1,MMP9,PECAM1,PVRL3,RA P1GAP,SLC12A8,SMO,TGFB1,TM4SF1,TUBA1A,WISP1 | 22 |
|                                        |                                                                              |          |                                                                                                                                                                     |    |
| Gastrointestinal                       |                                                                              |          |                                                                                                                                                                     |    |
| Disease                                | gastrointestinal tract cancer invasion of squamous cell carcinoma cell lines | 2.51E-04 | ADAM9,ADAMTS1,ANGPT2,ANGPTL4,ANXA4,CDKN1A,CYR61,EGFL7,EPHB4,FSCN1 (includes EG:14086),HNF4A,IFITM1,MMP9,PECAM1,PVRL3,RA P1GAP,SLC12A8,SMO,TGFB1,TM4SF1,TUBA1A,WISP1 | 22 |
| Cellular Movement                      |                                                                              |          |                                                                                                                                                                     |    |
| Lymphoid Tissue                        |                                                                              |          |                                                                                                                                                                     |    |
| Structure and                          |                                                                              |          |                                                                                                                                                                     |    |
| Development                            | quantity of splenocytes                                                      | 2.51E-04 | FSCN1 (includes EG:14086),HBEGF,ITGA5,MMP9                                                                                                                          | 4  |
| Tissue Morphology                      | quantity of splenocytes                                                      | 2.51E-04 | CDKN1A,RFTN1,TNFRSF1A,ZEB1                                                                                                                                          | 4  |
|                                        |                                                                              |          |                                                                                                                                                                     |    |
| Cellular Movement                      | recruitment of phagocytes                                                    | 2.57E-04 | ANGPT2,MMP9,NOS3,PDE4B,PIP5K1C,TGFB1,TNFRSF1A,VWF                                                                                                                   | 8  |
| Cell-To-Cell Signaling and Interaction | recruitment of phagocytes                                                    | 2.57E-04 | ANGPT2,MMP9,NOS3,PDE4B,PIP5K1C,TGFB1,TNFRSF1A,VWF                                                                                                                   | 8  |
| Hematological System                   |                                                                              |          |                                                                                                                                                                     |    |
| Development and                        |                                                                              |          |                                                                                                                                                                     |    |
| Function                               | recruitment of phagocytes                                                    | 2.57E-04 | ANGPT2,MMP9,NOS3,PDE4B,PIP5K1C,TGFB1,TNFRSF1A,VWF                                                                                                                   | 8  |
| Immune Cell                            |                                                                              |          |                                                                                                                                                                     |    |
| Trafficking                            | recruitment of phagocytes                                                    | 2.57E-04 | ANGPT2,MMP9,NOS3,PDE4B,PIP5K1C,TGFB1,TNFRSF1A,VWF                                                                                                                   | 8  |

|                                                       |                                         |          |                                                                                                                                                                                                                                   |    |
|-------------------------------------------------------|-----------------------------------------|----------|-----------------------------------------------------------------------------------------------------------------------------------------------------------------------------------------------------------------------------------|----|
| Inflammatory Response                                 | recruitment of phagocytes               | 2.57E-04 | ANGPT2,MMP9,NOS3,PDE4B,PIP5K1C,TGFB1,TNFRSF1A,VWF                                                                                                                                                                                 | 8  |
| Renal and Urological Disease                          | urination disorder                      | 2.70E-04 | ADAMTS1,CDKN1A,EHD3,GIPC1,HBEGF,NOS3,TGFB1,THBD,VWF                                                                                                                                                                               | 9  |
| Cellular Growth and Proliferation                     | proliferation of gastrointestinal cells | 2.76E-04 | CDKN1A,HBEGF,MMP9,TGFB1                                                                                                                                                                                                           | 4  |
| Cardiovascular System Development and Function        | vascularization of cornea               | 2.76E-04 | ADAMTS1,CYR61,MMP9,TNFRSF1A                                                                                                                                                                                                       | 4  |
| Organismal Development                                | vascularization of cornea               | 2.76E-04 | ADAMTS1,CYR61,MMP9,TNFRSF1A                                                                                                                                                                                                       | 4  |
| Visual System Development and Function                | vascularization of cornea               | 2.76E-04 | ADAMTS1,CYR61,MMP9,TNFRSF1A                                                                                                                                                                                                       | 4  |
| Cellular Movement                                     | migration of smooth muscle cells        | 2.93E-04 | ANGPT2,EGFL7,HBEGF,MMP9,NOS3,RCAN1                                                                                                                                                                                                | 6  |
| Skeletal and Muscular System Development and Function | migration of smooth muscle cells        | 2.93E-04 | ANGPT2,EGFL7,HBEGF,MMP9,NOS3,RCAN1                                                                                                                                                                                                | 6  |
| Cancer                                                | papillary carcinoma                     | 2.93E-04 | ADAMTS1,CDKN1A,ITGA5,MMP9,RAP1GAP,TGFB1                                                                                                                                                                                           | 6  |
| Cellular Movement                                     | chemotaxis of cells                     | 2.97E-04 | ANGPT2,CDKN1A,CYR61,HBEGF,LRRK2,MMP9,NOS3,PDE4B,PIP5K1C,RAP1GAP,TGFB1,THBD,TNFRSF1A                                                                                                                                               | 13 |
| Cell Death and Survival                               | apoptosis of endothelial cells          | 3.05E-04 | ANGPT2,CDKN1A,MMP9,NOS3,PECAM1,TGFB1,TNFRSF1A                                                                                                                                                                                     | 7  |
| Organismal Survival                                   | organismal death                        | 3.22E-04 | ADAM9,ANGPT2,ANGPTL4,APBB2,ASPH,BACE2,CDKN1A,CREM (includes EG:12916),CYR61,EGFL7,EHD3,FLNC,FSCN1 (includes EG:14086),HAP1 (includes EG:15114),HBEGF,IRAK3,ITGA5,KLF2,MMP9,NOS3,PIP5K1C,PLCD3,TGFB1,THBD,TNFRSF1A,TSHZ3,UGCG,ZEB1 | 28 |
| Tissue Morphology                                     | quantity of connective tissue cells     | 3.29E-04 | ANGPT2,CDKN1A,HDC,IRAK3,KLF2,NOS3,TGFB1,UGCG                                                                                                                                                                                      | 8  |
| Connective Tissue Development and Function            | quantity of connective tissue cells     | 3.29E-04 | ANGPT2,CDKN1A,HDC,IRAK3,KLF2,NOS3,TGFB1,UGCG                                                                                                                                                                                      | 8  |
| Organismal Injury and Abnormalities                   | microgliosis                            | 3.38E-04 | GRK5,LRRK2,TGFB1                                                                                                                                                                                                                  | 3  |
| Neurological Disease                                  | microgliosis                            | 3.38E-04 | GRK5,LRRK2,TGFB1                                                                                                                                                                                                                  | 3  |
| Tissue Development                                    | organization of epithelial tissue       | 3.38E-04 | EGFL7,HNF4A,TGFB1                                                                                                                                                                                                                 | 3  |
| Cell Morphology                                       | morphology of tumor cell lines          | 3.40E-04 | CDKN1A,CREM (includes EG:12916),GIPC1,PECAM1,RAP1GAP,TGFB1,THBD                                                                                                                                                                   | 7  |
| Cardiovascular System Development and Function        | formation of blood vessel               | 3.42E-04 | ADAMTS1,EPHB4,MMP9,NOS3,PDE2A                                                                                                                                                                                                     | 5  |
| Organismal Development                                | formation of blood vessel               | 3.42E-04 | ADAMTS1,EPHB4,MMP9,NOS3,PDE2A                                                                                                                                                                                                     | 5  |
| Tissue Development                                    | clustering of Langerhans cells          | 3.52E-04 | PECAM1,TGFB1                                                                                                                                                                                                                      | 2  |

|                                               |                                             |          |                                               |   |
|-----------------------------------------------|---------------------------------------------|----------|-----------------------------------------------|---|
| Cell-To-Cell Signaling and Interaction        | clustering of Langerhans cells              | 3.52E-04 | PECAM1,TGFB1                                  | 2 |
| Hematological System Development and Function | clustering of Langerhans cells              | 3.52E-04 | PECAM1,TGFB1                                  | 2 |
| Immune Cell Trafficking                       | clustering of Langerhans cells              | 3.52E-04 | PECAM1,TGFB1                                  | 2 |
| Inflammatory Response                         | clustering of Langerhans cells              | 3.52E-04 | PECAM1,TGFB1                                  | 2 |
| Developmental Disorder                        | distal myopathy                             | 3.52E-04 | DYSF,FLNC                                     | 2 |
| Hereditary Disorder                           | distal myopathy                             | 3.52E-04 | DYSF,FLNC                                     | 2 |
| Skeletal and Muscular Disorders               | distal myopathy                             | 3.52E-04 | DYSF,FLNC                                     | 2 |
| Cancer                                        | epithelial-mesenchymal transition of tumor  | 3.52E-04 | TGFB1,ZEB1                                    | 2 |
| Cellular Development                          | epithelial-mesenchymal transition of tumor  | 3.52E-04 | TGFB1,ZEB1                                    | 2 |
| Cellular Movement                             | transmigration of phagocytes                | 3.85E-04 | MMP9,PECAM1,ST3GAL4,TGFB1,TNFRSF1A            | 5 |
| Hematological System Development and Function | transmigration of phagocytes                | 3.85E-04 | MMP9,PECAM1,ST3GAL4,TGFB1,TNFRSF1A            | 5 |
| Immune Cell Trafficking                       | transmigration of phagocytes                | 3.85E-04 | MMP9,PECAM1,ST3GAL4,TGFB1,TNFRSF1A            | 5 |
| Inflammatory Response                         | transmigration of phagocytes                | 3.85E-04 | MMP9,PECAM1,ST3GAL4,TGFB1,TNFRSF1A            | 5 |
| Cell Death and Survival                       | cell death of Schwann cells                 | 3.99E-04 | MMP9,TGFB1,TNFRSF1A                           | 3 |
| Neurological Disease                          | late-onset Alzheimer's disease              | 3.99E-04 | APBB2,BIN1,NOS3                               | 3 |
| Psychological Disorders                       | late-onset Alzheimer's disease              | 3.99E-04 | APBB2,BIN1,NOS3                               | 3 |
| Amino Acid Metabolism                         | metabolism of basic amino acid              | 3.99E-04 | HDC,HNF4A,NOS3                                | 3 |
| Small Molecule Biochemistry                   | metabolism of basic amino acid              | 3.99E-04 | HDC,HNF4A,NOS3                                | 3 |
| Cellular Development                          | proliferation of granulosa cells            | 3.99E-04 | CDKN1A,TGFB1,TNFRSF1A                         | 3 |
| Cellular Growth and Proliferation             | proliferation of granulosa cells            | 3.99E-04 | CDKN1A,TGFB1,TNFRSF1A                         | 3 |
| Reproductive System Development and Function  | proliferation of granulosa cells            | 3.99E-04 | CDKN1A,TGFB1,TNFRSF1A                         | 3 |
| Organismal Survival                           | mortality                                   | 4.01E-04 | BIN1,CDKN1A,IRAK3,MMP9,NOS3,TNFRSF1A          | 6 |
| Tissue Development                            | aggregation of tumor cell lines             | 4.32E-04 | CDKN1A,MMP9,TGFB1,THBD                        | 4 |
| Gene Expression                               | induction of RNA                            | 4.32E-04 | CREM (includes EG:12916),PDE2A,TGFB1,TNFRSF1A | 4 |
| Cellular Movement                             | migration of hematopoietic progenitor cells | 4.32E-04 | ITGA5,KLF2,MMP9,PECAM1                        | 4 |
| Hematological System Development and Function | migration of hematopoietic progenitor cells | 4.32E-04 | ITGA5,KLF2,MMP9,PECAM1                        | 4 |

|                                               |                                      |          |                                                                                                                                                                                                                                                                                      |    |
|-----------------------------------------------|--------------------------------------|----------|--------------------------------------------------------------------------------------------------------------------------------------------------------------------------------------------------------------------------------------------------------------------------------------|----|
| Tissue Morphology                             | quantity of cells                    | 4.41E-04 | ADAMTS1,ANGPT2,CDKN1A,CP,CREM (includes EG:12916),DBC1,DOK1,ELMO1,FLNC,HBEGF,HDC,IRAK3,KIF5C,KLF2,MMP9,NES,NOS3,PDE4B,PECAM1,RCAN1,RFTN1,SLC20A1,SMO,ST3GAL1,ST3GAL4,TGFB1,TNFRSF1A,UGCG,ZEB1                                                                                        | 29 |
| Cell Death and Survival                       | apoptosis                            | 4.43E-04 | ANGPT2,ANGPTL4,APBB2,BIN1,CAMK2N2,CDKN1A,CHL1,CREM (includes EG:12916),CYR61,DAB2,ELMO1,EPHB4,FAIM2,FRZB,HAP1 (includes EG:15114),HBEGF,HNF4A,IRAK3,ITGA5,KLF2,LRRK2,MMP9,NOS3,PDE4B,PECAM1,PLCD3,RANBP1,RCAN1,SEMA7A,SLC20A1,SMO,ST3GAL1,STXBP1,TGFB1,THBD,TNFRSF1A,UGCG,WISP1,ZEB1 | 39 |
| Cellular Movement                             | adhesion of T lymphocytes            | 4.57E-04 | ITGA5,PECAM1,PIP5K1C,RAP1GAP,TGFB1                                                                                                                                                                                                                                                   | 5  |
| Tissue Development                            | adhesion of T lymphocytes            | 4.57E-04 | ITGA5,PECAM1,PIP5K1C,RAP1GAP,TGFB1                                                                                                                                                                                                                                                   | 5  |
| Cell-To-Cell Signaling and Interaction        | adhesion of T lymphocytes            | 4.57E-04 | ITGA5,PECAM1,PIP5K1C,RAP1GAP,TGFB1                                                                                                                                                                                                                                                   | 5  |
| Hematological System Development and Function | adhesion of T lymphocytes            | 4.57E-04 | ITGA5,PECAM1,PIP5K1C,RAP1GAP,TGFB1                                                                                                                                                                                                                                                   | 5  |
| Immune Cell Trafficking                       | adhesion of T lymphocytes            | 4.57E-04 | ITGA5,PECAM1,PIP5K1C,RAP1GAP,TGFB1                                                                                                                                                                                                                                                   | 5  |
| Cell-mediated Immune Response                 | adhesion of T lymphocytes            | 4.57E-04 | ITGA5,PECAM1,PIP5K1C,RAP1GAP,TGFB1                                                                                                                                                                                                                                                   | 5  |
| Cellular Development                          | proliferation of prostate cell lines | 4.67E-04 | CYR61,DAB2,TGFB1                                                                                                                                                                                                                                                                     | 3  |
| Cellular Growth and Proliferation             | proliferation of prostate cell lines | 4.67E-04 | CYR61,DAB2,TGFB1                                                                                                                                                                                                                                                                     | 3  |
| Reproductive System Development and Function  | proliferation of prostate cell lines | 4.67E-04 | CYR61,DAB2,TGFB1                                                                                                                                                                                                                                                                     | 3  |
| Cancer                                        | lung cancer                          | 4.71E-04 | ADAM9,ADAMTS1,ANGPTL4,CDKN1A,CYR61,DOK1,EGFL7,EPHB4,HNF4A,ITGA5,MMP9,THBD,TUBA1A,VWF                                                                                                                                                                                                 | 14 |
| Respiratory Disease                           | lung cancer                          | 4.71E-04 | ADAM9,ADAMTS1,ANGPTL4,CDKN1A,CYR61,DOK1,EGFL7,EPHB4,HNF4A,ITGA5,MMP9,THBD,TUBA1A,VWF                                                                                                                                                                                                 | 14 |
| Cancer                                        | metastasis of tumor cell lines       | 4.83E-04 | ADAMTS1,ANGPT2,ANGPTL4,NOS3,WISP1                                                                                                                                                                                                                                                    | 5  |
| Cellular Movement                             | transmigration of cells              | 4.95E-04 | MMP9,PECAM1,RAP1GAP,ST3GAL4,TGFB1,TNFRSF1A                                                                                                                                                                                                                                           | 6  |
| Cancer                                        | pancreatic adenocarcinoma            | 5.09E-04 | CDKN1A,CYR61,HBEGF,IFITM1                                                                                                                                                                                                                                                            | 4  |
| Endocrine System Disorders                    | pancreatic adenocarcinoma            | 5.09E-04 | CDKN1A,CYR61,HBEGF,IFITM1                                                                                                                                                                                                                                                            | 4  |
| Gastrointestinal Disease                      | pancreatic adenocarcinoma            | 5.09E-04 | CDKN1A,CYR61,HBEGF,IFITM1                                                                                                                                                                                                                                                            | 4  |
| Cellular Movement                             | invasion of carcinoma cell lines     | 5.10E-04 | ADAM9,FSCN1 (includes EG:14086),RAP1GAP,TGFB1,WISP1                                                                                                                                                                                                                                  | 5  |
| Cellular Movement                             | invasion of breast cancer cell lines | 5.14E-04 | ADAMTS1,EPHB4,GIPC1,ITGA5,MMP9,TGFB1,ZEB1                                                                                                                                                                                                                                            | 7  |
| Renal and Urological Disease                  | diabetic nephropathy                 | 5.16E-04 | CDKN1A,ELMO1,MYO1B,PDE2A,PECAM1,TGFB1                                                                                                                                                                                                                                                | 6  |
| Cardiovascular Disease                        | dysfunction of left ventricle        | 5.42E-04 | ANGPTL4,CREM (includes EG:12916),MMP9                                                                                                                                                                                                                                                | 3  |

|                                                                    |                                        |          |                                                                                                                                                                                      |    |
|--------------------------------------------------------------------|----------------------------------------|----------|--------------------------------------------------------------------------------------------------------------------------------------------------------------------------------------|----|
| Cardiovascular System<br>Development and<br>Function               | function of blood-brain barrier        | 5.42E-04 | MMP9,NOS3,VWF                                                                                                                                                                        | 3  |
| Organ Development<br>Nervous System<br>Development and<br>Function | function of blood-brain barrier        | 5.42E-04 | MMP9,NOS3,VWF                                                                                                                                                                        | 3  |
| Embryonic<br>Development                                           | function of blood-brain barrier        | 5.42E-04 | MMP9,NOS3,VWF                                                                                                                                                                        | 3  |
|                                                                    | apoptosis of ectoderm                  | 5.84E-04 | HNF4A,UGCG                                                                                                                                                                           | 2  |
| Cell Death and Survival                                            | apoptosis of ectoderm                  | 5.84E-04 | HNF4A,UGCG                                                                                                                                                                           | 2  |
| Cellular Development<br>Cancer                                     | differentiation of goblet cells        | 5.84E-04 | CDKN1A,HNF4A                                                                                                                                                                         | 2  |
|                                                                    | hyperplasia of neointima               | 5.84E-04 | MMP9,NOS3                                                                                                                                                                            | 2  |
| Cardiovascular Disease                                             | hyperplasia of neointima               | 5.84E-04 | MMP9,NOS3                                                                                                                                                                            | 2  |
| Cellular Development<br>Cellular Growth and<br>Proliferation       | proliferation of preosteoblastic cells | 5.84E-04 | HBEGF,TGFB1                                                                                                                                                                          | 2  |
|                                                                    | proliferation of preosteoblastic cells | 5.84E-04 | HBEGF,TGFB1                                                                                                                                                                          | 2  |
| Cardiovascular Disease<br>Organismal Injury and<br>Abnormalities   | size of thrombus                       | 5.84E-04 | PECAM1,VWF                                                                                                                                                                           | 2  |
|                                                                    | size of thrombus                       | 5.84E-04 | PECAM1,VWF                                                                                                                                                                           | 2  |
| Cellular Development<br>Cellular Growth and<br>Proliferation       | proliferation of epithelial cell lines | 5.86E-04 | CDKN1A,CYR61,DAB2,FSCN1 (includes<br>EG:14086),HNF4A,ITGA5,TGFB1                                                                                                                     | 7  |
| Hair and Skin<br>Development and<br>Function                       | proliferation of epithelial cell lines | 5.86E-04 | CDKN1A,CYR61,DAB2,FSCN1 (includes<br>EG:14086),HNF4A,ITGA5,TGFB1                                                                                                                     | 7  |
|                                                                    | proliferation of epithelial cell lines | 5.86E-04 | CDKN1A,CYR61,DAB2,FSCN1 (includes<br>EG:14086),HNF4A,ITGA5,TGFB1                                                                                                                     | 7  |
| Tissue Morphology                                                  | morphology of embryonic tissue         | 6.18E-04 | CDKN1A,CYR61,DAB2,FSCN1 (includes<br>EG:14086),HNF4A,ITGA5,TGFB1<br>APBB2,CDKN1A,DAB2,HAP1 (includes<br>EG:15114),HNF4A,ITGA5,KLF2,SERPINH1,SLC20A1,S<br>MO,TGFB1,THBD,TNFRSF1A,UGCG | 14 |
| Tissue Development<br>Organismal Injury and<br>Abnormalities       | formation of epithelial tissue         | 6.29E-04 | KLF2,NOS3,PECAM1,SERPINH1,TGFB1                                                                                                                                                      | 5  |
| Organismal<br>Development<br>Embryonic<br>Development              | stenosis                               | 6.29E-04 | CDKN1A,HBEGF,MMP9,RCAN1,THBD                                                                                                                                                         | 5  |
|                                                                    | implantation of embryo                 | 6.42E-04 | ADAMTS1,HBEGF,MMP9,NOS3                                                                                                                                                              | 4  |
|                                                                    | implantation of embryo                 | 6.42E-04 | ADAMTS1,HBEGF,MMP9,NOS3                                                                                                                                                              | 4  |
| Reproductive System<br>Development and<br>Function                 | implantation of embryo                 | 6.42E-04 | ADAMTS1,HBEGF,MMP9,NOS3                                                                                                                                                              | 4  |
| Cardiovascular System<br>Development and<br>Function               | morphology of heart                    | 6.75E-04 | ADAM9,BIN1,H19,HBEGF,MMP9,NOS3,PLXND1,SLC<br>O2A1,TGFB1,THBD                                                                                                                         | 10 |
| Organ Morphology                                                   | morphology of heart                    | 6.75E-04 | ADAM9,BIN1,H19,HBEGF,MMP9,NOS3,PLXND1,SLC<br>O2A1,TGFB1,THBD                                                                                                                         | 10 |
| Cellular Development<br>Cellular Growth and<br>Proliferation       | proliferation of hepatocytes           | 6.80E-04 | CDKN1A,H19,HNF4A,SLC20A1,TGFB1,TNFRSF1A                                                                                                                                              | 6  |
|                                                                    | proliferation of hepatocytes           | 6.80E-04 | CDKN1A,H19,HNF4A,SLC20A1,TGFB1,TNFRSF1A                                                                                                                                              | 6  |

|                                                      |                                        |          |                                                                                                                                                                    |    |
|------------------------------------------------------|----------------------------------------|----------|--------------------------------------------------------------------------------------------------------------------------------------------------------------------|----|
| Hepatic System Development and Function              | proliferation of hepatocytes           | 6.80E-04 | CDKN1A,H19,HNF4A,SLC20A1,TGFB1,TNFRSF1A                                                                                                                            | 6  |
| Inflammatory Disease                                 | Encephalitis                           | 6.86E-04 | HDC,MMP9,PECAM1,RFTN1,TGFB1,TNFRSF1A,UNC93B1,VWF                                                                                                                   | 8  |
| Neurological Disease                                 | Encephalitis                           | 6.86E-04 | HDC,MMP9,PECAM1,RFTN1,TGFB1,TNFRSF1A,UNC93B1,VWF                                                                                                                   | 8  |
| Cell Death and Survival                              | cell death of liver cells              | 6.86E-04 | CDKN1A,HNF4A,MMP9,SLC20A1,TGFB1,TNFRSF1A,UGCG                                                                                                                      | 7  |
| Cardiovascular Disease                               | fibrosis of heart                      | 6.97E-04 | ANGPT2,CREM (includes EG:12916),MMP9,NOS3,TGFB1                                                                                                                    | 5  |
| Organismal Injury and Abnormalities                  | fibrosis of heart                      | 6.97E-04 | ANGPT2,CREM (includes EG:12916),MMP9,NOS3,TGFB1                                                                                                                    | 5  |
| Cancer                                               | endocrine gland tumor                  | 7.14E-04 | ADAM9,ADAMTS1,ANGPT2,CDKN1A,CYR61,EPHB4,FRZB,HBEGF,IFITM1,ITGA5,MMP9,RAP1GAP,TGFB1                                                                                 | 13 |
| Cell Death and Survival                              | cell death of breast cancer cell lines | 7.27E-04 | ANGPT2,CDKN1A,CYR61,DAB2,NOS3,RGS16,TGFB1,TNFRSF1A,UGCG                                                                                                            | 9  |
| Cancer                                               | papillary thyroid cancer               | 7.32E-04 | ADAMTS1,CDKN1A,ITGA5,RAP1GAP,TGFB1                                                                                                                                 | 5  |
| Endocrine System Disorders                           | papillary thyroid cancer               | 7.32E-04 | ADAMTS1,CDKN1A,ITGA5,RAP1GAP,TGFB1                                                                                                                                 | 5  |
| Cancer                                               | T-cell non-Hodgkin's disease           | 7.34E-04 | CYR61,MMP9,RGS16,TUBA1A,TUBB6,ZEB1                                                                                                                                 | 6  |
| Hematological Disease                                | T-cell non-Hodgkin's disease           | 7.34E-04 | CYR61,MMP9,RGS16,TUBA1A,TUBB6,ZEB1                                                                                                                                 | 6  |
| Molecular Transport                                  | transport of metal ion                 | 7.78E-04 | ATP2A3,CNKSR3,CP,KCNK6,NDRG2,NOS3,SLC20A1,SLC5A5,TGFB1                                                                                                             | 9  |
| Cancer                                               | skin cancer                            | 7.78E-04 | ADAM9,ANGPTL4,CDKN1A,PECAM1,RGS16,SMO,TGFB1,TUBA1A,WISP1,ZEB1                                                                                                      | 10 |
| Dermatological Diseases and Conditions               | skin cancer                            | 7.78E-04 | ADAM9,ANGPTL4,CDKN1A,PECAM1,RGS16,SMO,TGFB1,TUBA1A,WISP1,ZEB1                                                                                                      | 10 |
| Cell Morphology                                      | morphology of cells                    | 7.83E-04 | CDKN1A,CHL1,CP,CREM (includes EG:12916),DOK1,ELMO1,FAIM2,GIPC1,HBEGF,HDC,HNF4A,KLF2,MMP9,NOS3,OTOS,PECAM1,PVRL3,RAP1GAP,RCAN1,SPARCL1,TGFB1,THBD,TNFRSF1A,UGCG,VWF | 25 |
| Renal and Urological System Development and Function | proliferation of kidney cell lines     | 7.91E-04 | CDKN1A,HNF4A,ITGA5,TGFB1,WISP1,ZEB1                                                                                                                                | 6  |
| Cellular Development                                 | proliferation of kidney cell lines     | 7.91E-04 | CDKN1A,HNF4A,ITGA5,TGFB1,WISP1,ZEB1                                                                                                                                | 6  |
| Cellular Growth and Proliferation                    | proliferation of kidney cell lines     | 7.91E-04 | CDKN1A,HNF4A,ITGA5,TGFB1,WISP1,ZEB1                                                                                                                                | 6  |
| Cardiovascular Disease                               | thrombosis                             | 7.91E-04 | ANGPT2,HBEGF,TGFB1,THBD,TNFRSF1A,VWF                                                                                                                               | 6  |
| Hematological Disease                                | thrombosis                             | 7.91E-04 | ANGPT2,HBEGF,TGFB1,THBD,TNFRSF1A,VWF                                                                                                                               | 6  |
| Tissue Development                                   | cell-cell adhesion of tumor cell lines | 8.11E-04 | DAB2,RAP1GAP,ZEB1                                                                                                                                                  | 3  |
| Cell-To-Cell Signaling and Interaction               | cell-cell adhesion of tumor cell lines | 8.11E-04 | DAB2,RAP1GAP,ZEB1                                                                                                                                                  | 3  |
| Cellular Development                                 | differentiation of breast cell lines   | 8.11E-04 | DAB2,TGFB1,ZEB1                                                                                                                                                    | 3  |

|                                   |                                      |          |                                                                                                                      |    |
|-----------------------------------|--------------------------------------|----------|----------------------------------------------------------------------------------------------------------------------|----|
| Reproductive System               |                                      |          |                                                                                                                      |    |
| Development and Function          | differentiation of breast cell lines | 8.11E-04 | DAB2,TGFB1,ZEB1                                                                                                      | 3  |
| Cellular Movement                 | invasion of epithelial cell lines    | 8.11E-04 | FSCN1 (includes EG:14086),MMP9,TGFB1                                                                                 | 3  |
| Cancer                            | metastasis of melanoma cell lines    | 8.11E-04 | ANGPTL4,NOS3,WISP1                                                                                                   | 3  |
|                                   |                                      |          | CP,ELMO1,EPHB4,HAP1 (includes EG:15114),LMCD1,LRRK2,MYO1B,NDRG2,PCDH7,PD E4B,RANBP1,RAP1GAP,RCAN1,SPARCL1,TNFRSF1A,T |    |
| Neurological Disease              | disorder of basal ganglia            | 8.63E-04 | UBA1A,UGCG                                                                                                           | 17 |
| Cardiovascular System             |                                      |          |                                                                                                                      |    |
| Development and Function          | angiogenesis of ear                  | 8.72E-04 | KLF2,TM4SF1                                                                                                          | 2  |
| Organismal Development            | angiogenesis of ear                  | 8.72E-04 | KLF2,TM4SF1                                                                                                          | 2  |
| Tissue Development                | angiogenesis of ear                  | 8.72E-04 | KLF2,TM4SF1                                                                                                          | 2  |
| Embryonic Development             | angiogenesis of ear                  | 8.72E-04 | KLF2,TM4SF1                                                                                                          | 2  |
| Organ Development                 | angiogenesis of ear                  | 8.72E-04 | KLF2,TM4SF1                                                                                                          | 2  |
| Auditory and Vestibular System    |                                      |          |                                                                                                                      |    |
| Development and Function          | angiogenesis of ear                  | 8.72E-04 | KLF2,TM4SF1                                                                                                          | 2  |
| Cellular Development              | arrest in growth of lymphocytes      | 8.72E-04 | CDKN1A,TGFB1                                                                                                         | 2  |
| Cellular Growth and Proliferation | arrest in growth of lymphocytes      | 8.72E-04 | CDKN1A,TGFB1                                                                                                         | 2  |
| Hematological System              |                                      |          |                                                                                                                      |    |
| Development and Function          | arrest in growth of lymphocytes      | 8.72E-04 | CDKN1A,TGFB1                                                                                                         | 2  |
| Inflammatory Response             | degranulation of blood platelets     | 8.72E-04 | STXBP1,VWF                                                                                                           | 2  |
| Cellular Compromise               | degranulation of blood platelets     | 8.72E-04 | STXBP1,VWF                                                                                                           | 2  |
| Organ Morphology                  | enlargement of alveolar lumen        | 8.72E-04 | MMP9,TGFB1                                                                                                           | 2  |
| Cellular Development              | senescence of keratinocytes          | 8.72E-04 | CDKN1A,TGFB1                                                                                                         | 2  |
| Hair and Skin                     |                                      |          |                                                                                                                      |    |
| Development and Function          | senescence of keratinocytes          | 8.72E-04 | CDKN1A,TGFB1                                                                                                         | 2  |
| Cell Cycle                        | senescence of keratinocytes          | 8.72E-04 | CDKN1A,TGFB1                                                                                                         | 2  |
| Cell Death and Survival           | cell death of hepatocytes            | 8.83E-04 | CDKN1A,HNF4A,SLC20A1,TGFB1,TNFRSF1A,UGCG                                                                             | 6  |
| Cell Morphology                   | cell spreading                       | 8.86E-04 | CYR61,DAB2,FLNC,ITGA5,MMP9,PECAM1,RAP1GAP, VWF                                                                       | 8  |
| Cardiovascular System             |                                      |          |                                                                                                                      |    |
| Development and Function          | morphology of heart ventricle        | 9.01E-04 | ADAM9,BIN1,H19,HBEGF,MMP9,NOS3,SLCO2A1                                                                               | 7  |
| Organ Morphology                  | morphology of heart ventricle        | 9.01E-04 | ADAM9,BIN1,H19,HBEGF,MMP9,NOS3,SLCO2A1                                                                               | 7  |
| Cardiovascular Disease            | vascular lesion                      | 9.01E-04 | ANGPT2,KLF2,MMP9,NOS3,RCAN1,THBD,TNFRSF1A                                                                            | 7  |



|                                                              |                                            |          |                                                                                                                                                                                                 |    |
|--------------------------------------------------------------|--------------------------------------------|----------|-------------------------------------------------------------------------------------------------------------------------------------------------------------------------------------------------|----|
| Cardiovascular Disease                                       | carditis                                   | 9.16E-04 | KLF2,MMP9,TGFB1,TUBA1A                                                                                                                                                                          | 4  |
| Inflammatory Disease                                         | carditis                                   | 9.16E-04 | KLF2,MMP9,TGFB1,TUBA1A                                                                                                                                                                          | 4  |
| Cardiovascular System Development and Function               | formation of endothelial tube              | 9.16E-04 | KLF2,NOS3,PECAM1,TGFB1                                                                                                                                                                          | 4  |
| Tissue Development                                           | formation of endothelial tube              | 9.16E-04 | KLF2,NOS3,PECAM1,TGFB1                                                                                                                                                                          | 4  |
| Cardiovascular System Development and Function               | permeability of blood vessel               | 9.16E-04 | ANGPT2,PECAM1,VWF                                                                                                                                                                               | 3  |
| Tissue Morphology                                            | permeability of blood vessel               | 9.16E-04 | ANGPT2,PECAM1,VWF                                                                                                                                                                               | 3  |
| Cellular Development Cellular Growth and Proliferation       | proliferation of ovarian cancer cell lines | 9.30E-04 | CAMK2N2,DAB2,HBEGF,KLF2,TGFB1                                                                                                                                                                   | 5  |
| Cellular Assembly and Organization                           | proliferation of ovarian cancer cell lines | 9.30E-04 | CAMK2N2,DAB2,HBEGF,KLF2,TGFB1                                                                                                                                                                   | 5  |
| Cellular Function and Maintenance                            | organization of actin cytoskeleton         | 9.83E-04 | ELMO1,FLNC,FSCN1 (includes EG:14086),PIP5K1C,RHOJ,TGFB1,VWF                                                                                                                                     | 7  |
|                                                              | organization of actin cytoskeleton         | 9.83E-04 | ELMO1,FLNC,FSCN1 (includes EG:14086),PIP5K1C,RHOJ,TGFB1,VWF                                                                                                                                     | 7  |
| Cell Death and Survival                                      | apoptosis of liver cells                   | 9.83E-04 | CDKN1A,HNF4A,MMP9,SLC20A1,TGFB1,TNFRSF1A                                                                                                                                                        | 6  |
| Molecular Transport Free Radical Scavenging                  | quantity of reactive oxygen species        | 9.83E-04 | CDKN1A,CP,KLF2,NOS3,TGFB1,TNFRSF1A                                                                                                                                                              | 6  |
|                                                              | quantity of reactive oxygen species        | 9.83E-04 | CDKN1A,CP,KLF2,NOS3,TGFB1,TNFRSF1A                                                                                                                                                              | 6  |
| Cancer                                                       | digestive organ tumor                      | 9.88E-04 | ADAM9,ADAMTS1,ANGPT2,ANGPTL4,ANXA4,CDKN1A,CP,CYR61,EGFL7,EPHB4,FSCN1 (includes EG:14086),HBEGF,HNF4A,IFITM1,ITGA5,MMP9,PDE2A,PECAM1,PVRL3,RAP1GAP,SLC12A8,SMO,SPARCL1,TGFB1,TM4SF1,TUBA1A,WISP1 | 27 |
| Gastrointestinal Disease                                     | digestive organ tumor                      | 9.88E-04 | ADAM9,ADAMTS1,ANGPT2,ANGPTL4,ANXA4,CDKN1A,CP,CYR61,EGFL7,EPHB4,FSCN1 (includes EG:14086),HBEGF,HNF4A,IFITM1,ITGA5,MMP9,PDE2A,PECAM1,PVRL3,RAP1GAP,SLC12A8,SMO,SPARCL1,TGFB1,TM4SF1,TUBA1A,WISP1 | 27 |
| Cellular Development Hepatic System Development and Function | differentiation of liver cells             | 1.03E-03 | FRZB,HNF4A,TGFB1                                                                                                                                                                                | 3  |
|                                                              | differentiation of liver cells             | 1.03E-03 | FRZB,HNF4A,TGFB1                                                                                                                                                                                | 3  |
| Cell Death and Survival                                      | apoptosis of breast cancer cell lines      | 1.08E-03 | ANGPT2,CDKN1A,CYR61,DAB2,NOS3,TGFB1,TNFRSF1A,UGCG                                                                                                                                               | 8  |
| Cardiovascular System Development and Function               | abnormal morphology of heart septum        | 1.12E-03 | BIN1,H19,MMP9,NOS3                                                                                                                                                                              | 4  |
| Organ Morphology                                             | abnormal morphology of heart septum        | 1.12E-03 | BIN1,H19,MMP9,NOS3                                                                                                                                                                              | 4  |
| Tissue Development                                           | aggregation of blood platelets             | 1.13E-03 | DAB2,NOS3,PECAM1,STXBP1,TGFB1,VWF                                                                                                                                                               | 6  |

|                                                     |                                       |          |                                                                                                                                               |    |
|-----------------------------------------------------|---------------------------------------|----------|-----------------------------------------------------------------------------------------------------------------------------------------------|----|
| Hematological System<br>Development and<br>Function | aggregation of blood platelets        | 1.13E-03 | DAB2,NOS3,PECAM1,STXBP1,TGFB1,VWF                                                                                                             | 6  |
| Inflammatory<br>Response                            | aggregation of blood platelets        | 1.13E-03 | DAB2,NOS3,PECAM1,STXBP1,TGFB1,VWF                                                                                                             | 6  |
| Developmental<br>Disorder                           | growth failure                        | 1.15E-03 | AQP5,CDKN1A,CSGALNACT1,HAP1 (includes<br>EG:15114),HNF4A,HSD3B7,ITGA5,KLF2,MMP9,NOS3,<br>RANBP1,SLC20A1,SMO,TGFB1                             | 14 |
| Tissue Development                                  | adhesion of eosinophils               | 1.15E-03 | ITGA5,PECAM1,THBD                                                                                                                             | 3  |
| Cell-To-Cell Signaling<br>and Interaction           | adhesion of eosinophils               | 1.15E-03 | ITGA5,PECAM1,THBD                                                                                                                             | 3  |
| Hematological System<br>Development and<br>Function | adhesion of eosinophils               | 1.15E-03 | ITGA5,PECAM1,THBD                                                                                                                             | 3  |
| Immune Cell<br>Trafficking                          | adhesion of eosinophils               | 1.15E-03 | ITGA5,PECAM1,THBD                                                                                                                             | 3  |
| Hypersensitivity<br>Response                        | adhesion of eosinophils               | 1.15E-03 | ITGA5,PECAM1,THBD                                                                                                                             | 3  |
| Neurological Disease                                | neuromuscular disease                 | 1.17E-03 | CP,DBC1,ELMO1,EPHB4,HAP1 (includes<br>EG:15114),LMCD1,LRRK2,MYO1B,NDRG2,PCDH7,PD<br>E4B,RANBP1,RAP1GAP,RCAN1,SPARCL1,TNFRSF1A,T<br>UBA1A,UGCG | 18 |
| Skeletal and Muscular<br>Disorders                  | neuromuscular disease                 | 1.17E-03 | CP,DBC1,ELMO1,EPHB4,HAP1 (includes<br>EG:15114),LMCD1,LRRK2,MYO1B,NDRG2,PCDH7,PD<br>E4B,RANBP1,RAP1GAP,RCAN1,SPARCL1,TNFRSF1A,T<br>UBA1A,UGCG | 18 |
| Molecular Transport                                 | quantity of anion                     | 1.19E-03 | AQP5,HDC,NOS3,TNFRSF1A                                                                                                                        | 4  |
| Cardiovascular Disease                              | myocardial infarction                 | 1.21E-03 | MMP9,NOS3,PECAM1,THBD,TNFRSF1A,VWF                                                                                                            | 6  |
| Tissue Development                                  | adhesion of lung cancer cells         | 1.21E-03 | ADAM9,ITGA5                                                                                                                                   | 2  |
| Cell-To-Cell Signaling<br>and Interaction           | adhesion of lung cancer cells         | 1.21E-03 | ADAM9,ITGA5                                                                                                                                   | 2  |
| Cellular Compromise<br>Tumor Morphology             | adhesion of lung cancer cells         | 1.21E-03 | ADAM9,ITGA5                                                                                                                                   | 2  |
| Tissue Development                                  | adhesion of lung cancer cells         | 1.21E-03 | ADAM9,ITGA5                                                                                                                                   | 2  |
| Tissue Development                                  | adhesion of stomach cancer cell lines | 1.21E-03 | CYR61,PVRL3                                                                                                                                   | 2  |
| Cell-To-Cell Signaling<br>and Interaction           | adhesion of stomach cancer cell lines | 1.21E-03 | CYR61,PVRL3                                                                                                                                   | 2  |
| Cancer                                              | arrest in G1 phase of cancer cells    | 1.21E-03 | CDKN1A,TGFB1                                                                                                                                  | 2  |
| Cell Cycle                                          | arrest in G1 phase of cancer cells    | 1.21E-03 | CDKN1A,TGFB1                                                                                                                                  | 2  |
| Cell Cycle                                          | arrest in late G1 phase               | 1.21E-03 | CDKN1A,TGFB1                                                                                                                                  | 2  |
| Cell-To-Cell Signaling<br>and Interaction           | binding of megakaryocytes             | 1.21E-03 | PECAM1,RAP1GAP                                                                                                                                | 2  |
| Hematological System<br>Development and<br>Function | binding of megakaryocytes             | 1.21E-03 | PECAM1,RAP1GAP                                                                                                                                | 2  |
| Hematopoiesis                                       | binding of megakaryocytes             | 1.21E-03 | PECAM1,RAP1GAP                                                                                                                                | 2  |

|                                                       |                                          |          |                                                                                                     |    |
|-------------------------------------------------------|------------------------------------------|----------|-----------------------------------------------------------------------------------------------------|----|
| Inflammatory Response                                 | endotoxin tolerance of cells             | 1.21E-03 | IRAK3,TGFB1                                                                                         | 2  |
| Amino Acid Metabolism                                 | oxidation of essential amino acids       | 1.21E-03 | CP,NOS3                                                                                             | 2  |
| Small Molecule Biochemistry                           | oxidation of essential amino acids       | 1.21E-03 | CP,NOS3                                                                                             | 2  |
| Energy Production                                     | oxidation of essential amino acids       | 1.21E-03 | CP,NOS3                                                                                             | 2  |
| Post-Translational Modification                       | oxidation of essential amino acids       | 1.21E-03 | CP,NOS3                                                                                             | 2  |
| Respiratory Disease                                   | remodeling of pulmonary alveolus         | 1.21E-03 | SEMA7A,TGFB1                                                                                        | 2  |
| Organ Morphology                                      | remodeling of pulmonary alveolus         | 1.21E-03 | SEMA7A,TGFB1                                                                                        | 2  |
| Organismal Injury and Abnormalities                   | remodeling of pulmonary alveolus         | 1.21E-03 | SEMA7A,TGFB1                                                                                        | 2  |
| Dermatological Diseases and Conditions                | rosacea                                  | 1.21E-03 | MMP9,TGFB1                                                                                          | 2  |
| Skeletal and Muscular System Development and Function | quantity of muscle cells                 | 1.22E-03 | ANGPT2,CDKN1A,FLNC,KLF2,RCAN1                                                                       | 5  |
| Tissue Morphology                                     | quantity of muscle cells                 | 1.22E-03 | ANGPT2,CDKN1A,FLNC,KLF2,RCAN1                                                                       | 5  |
| Cancer                                                | tumorigenesis of cells                   | 1.23E-03 | ANGPTL4,CAMK2N2,CDKN1A,CYR61,SMO,TGFB1,THBD                                                         | 7  |
| Cellular Assembly and Organization                    | formation of cellular protrusions        | 1.23E-03 | ANGPTL4,CDKN1A,CHL1,CYR61,ELMO1,GRASP,HNF4A,PIP5K1C,PVRL3,RANBP1,RAP1GAP,TGFB1,TM4SF1,TNFRSF1A,UGCG | 15 |
| Cellular Function and Maintenance                     | formation of cellular protrusions        | 1.23E-03 | ANGPTL4,CDKN1A,CHL1,CYR61,ELMO1,GRASP,HNF4A,PIP5K1C,PVRL3,RANBP1,RAP1GAP,TGFB1,TM4SF1,TNFRSF1A,UGCG | 15 |
| Cell Morphology                                       | formation of cellular protrusions        | 1.23E-03 | ANGPTL4,CDKN1A,CHL1,CYR61,ELMO1,GRASP,HNF4A,PIP5K1C,PVRL3,RANBP1,RAP1GAP,TGFB1,TM4SF1,TNFRSF1A,UGCG | 15 |
| Cancer                                                | endometrial carcinoma                    | 1.26E-03 | CP,FLNC,FRZB,KLF2,PLLP,SMO,SPARCL1,TGFB1,TSHZ3,TUBA1A,ZEB1                                          | 11 |
| Reproductive System Disease                           | endometrial carcinoma                    | 1.26E-03 | CP,FLNC,FRZB,KLF2,PLLP,SMO,SPARCL1,TGFB1,TSHZ3,TUBA1A,ZEB1                                          | 11 |
| Organismal Injury and Abnormalities                   | stenosis of blood vessel                 | 1.26E-03 | HBEGF,MMP9,RCAN1,THBD                                                                               | 4  |
| Molecular Transport                                   | transport of monovalent inorganic cation | 1.27E-03 | CNKS3,KCNK6,NDRG2,NOS3,SLC20A1,SLC5A5,TGFB1                                                         | 7  |
| Cancer                                                | uterine cancer                           | 1.27E-03 | CP,CYR61,DOK1,FLNC,FRZB,H19,KLF2,MMP9,PLLP,SMO,SPARCL1,TGFB1,TSHZ3,TUBA1A,UGCG,ZEB1                 | 16 |
| Reproductive System Disease                           | uterine cancer                           | 1.27E-03 | CP,CYR61,DOK1,FLNC,FRZB,H19,KLF2,MMP9,PLLP,SMO,SPARCL1,TGFB1,TSHZ3,TUBA1A,UGCG,ZEB1                 | 16 |
| Cardiovascular System Development and Function        | branching of blood vessel                | 1.28E-03 | ADAMTS1,ANGPT2,NOS3                                                                                 | 3  |
| Organismal Development                                | branching of blood vessel                | 1.28E-03 | ADAMTS1,ANGPT2,NOS3                                                                                 | 3  |
| Cellular Development                                  | branching of blood vessel                | 1.28E-03 | ADAMTS1,ANGPT2,NOS3                                                                                 | 3  |
| Cell Morphology                                       | branching of blood vessel                | 1.28E-03 | ADAMTS1,ANGPT2,NOS3                                                                                 | 3  |
| Cell Morphology                                       | morphology of breast cancer cell lines   | 1.28E-03 | GIPC1,PECAM1,TGFB1                                                                                  | 3  |

|                                               |                                                      |          |                                                                                                                                             |    |
|-----------------------------------------------|------------------------------------------------------|----------|---------------------------------------------------------------------------------------------------------------------------------------------|----|
| Cellular Development                          | proliferation of keratinocyte cancer cell lines      | 1.28E-03 | CDKN1A,TGFB1,UGCG                                                                                                                           | 3  |
| Cellular Growth and Proliferation             | proliferation of keratinocyte cancer cell lines      | 1.28E-03 | CDKN1A,TGFB1,UGCG                                                                                                                           | 3  |
| Renal and Urological Disease                  | Nephritis                                            | 1.33E-03 | CDKN1A,HBEGF,LRRK2,MMP9,NOS3,PDE4B,TGFB1,TNFRSF1A                                                                                           | 8  |
| Inflammatory Response                         | Nephritis                                            | 1.33E-03 | CDKN1A,HBEGF,LRRK2,MMP9,NOS3,PDE4B,TGFB1,TNFRSF1A                                                                                           | 8  |
| Inflammatory Disease                          | Nephritis                                            | 1.33E-03 | CDKN1A,HBEGF,LRRK2,MMP9,NOS3,PDE4B,TGFB1,TNFRSF1A                                                                                           | 8  |
| Cellular Movement                             | migration of phagocytes                              | 1.33E-03 | ITGA5,MMP9,PDE4B,PECAM1,PLXND1,ST3GAL4,TGFB1,TNFRSF1A                                                                                       | 8  |
| Hematological System Development and Function | migration of phagocytes                              | 1.33E-03 | ITGA5,MMP9,PDE4B,PECAM1,PLXND1,ST3GAL4,TGFB1,TNFRSF1A                                                                                       | 8  |
| Immune Cell Trafficking                       | migration of phagocytes                              | 1.33E-03 | ITGA5,MMP9,PDE4B,PECAM1,PLXND1,ST3GAL4,TGFB1,TNFRSF1A                                                                                       | 8  |
| Inflammatory Response                         | migration of phagocytes                              | 1.33E-03 | ITGA5,MMP9,PDE4B,PECAM1,PLXND1,ST3GAL4,TGFB1,TNFRSF1A                                                                                       | 8  |
| Cellular Movement                             | invasion of prostate cancer cell lines               | 1.34E-03 | FSCN1 (includes EG:14086),MMP9,NES,TGFB1                                                                                                    | 4  |
| Organismal Injury and Abnormalities           | fibrosis                                             | 1.36E-03 | ANGPT2,CREM (includes EG:12916),DYSF,HBEGF,HNF4A,ITGA5,MMP9,NOS3,SEMA7A,TGFB1,TM4SF1,TNFRSF1A                                               | 12 |
| Cancer                                        | pancreatic cancer                                    | 1.37E-03 | ADAM9,ADAMTS1,CDKN1A,CYR61,HBEGF,IFITM1,MMP9,TGFB1                                                                                          | 8  |
| Endocrine System Disorders                    | pancreatic cancer                                    | 1.37E-03 | ADAM9,ADAMTS1,CDKN1A,CYR61,HBEGF,IFITM1,MMP9,TGFB1                                                                                          | 8  |
| Gastrointestinal Disease                      | pancreatic cancer                                    | 1.37E-03 | ADAM9,ADAMTS1,CDKN1A,CYR61,HBEGF,IFITM1,MMP9,TGFB1                                                                                          | 8  |
| Molecular Transport                           | release of metal                                     | 1.37E-03 | ASPH,CP,GRK5,HAP1 (includes EG:15114),PECAM1,RGS16,TGFB1                                                                                    | 7  |
| Neurological Disease                          | movement disorder                                    | 1.39E-03 | CP,ELMO1,EPHB4,GRK5,HAP1 (includes EG:15114),HDC,LMCD1,LRRK2,MMP9,MYO1B,NDRG2,PCDH7,PDE4B,RANBP1,RAP1GAP,RCAN1,SPARCL1,TNFRSF1A,TUBA1A,UGCG | 20 |
| Cell Cycle                                    | arrest in G0/G1 phase transition of tumor cell lines | 1.42E-03 | CDKN1A,MMP9,TGFB1                                                                                                                           | 3  |
| Developmental Disorder                        | centronuclear myopathy                               | 1.42E-03 | BIN1,DYSF,FLNC                                                                                                                              | 3  |
| Hereditary Disorder                           | centronuclear myopathy                               | 1.42E-03 | BIN1,DYSF,FLNC                                                                                                                              | 3  |
| Skeletal and Muscular Disorders               | centronuclear myopathy                               | 1.42E-03 | BIN1,DYSF,FLNC                                                                                                                              | 3  |
| Tissue Morphology                             | closure of wound                                     | 1.42E-03 | ITGA5,MMP9,TGFB1                                                                                                                            | 3  |
| Cellular Compromise                           | depletion of cells                                   | 1.43E-03 | HBEGF,SMO,TGFB1,TNFRSF1A                                                                                                                    | 4  |
| Cellular Movement                             | migration of keratinocytes                           | 1.43E-03 | ADAM9,HBEGF,MMP9,TGFB1                                                                                                                      | 4  |
| Hair and Skin Development and Function        | migration of keratinocytes                           | 1.43E-03 | ADAM9,HBEGF,MMP9,TGFB1                                                                                                                      | 4  |
| Inflammatory Response                         | ulcerative colitis                                   | 1.43E-03 | MMP9,NOS3,PDE4B,TNFRSF1A                                                                                                                    | 4  |
| Gastrointestinal Disease                      | ulcerative colitis                                   | 1.43E-03 | MMP9,NOS3,PDE4B,TNFRSF1A                                                                                                                    | 4  |
| Inflammatory Disease                          | ulcerative colitis                                   | 1.43E-03 | MMP9,NOS3,PDE4B,TNFRSF1A                                                                                                                    | 4  |

|                                                       |                                          |          |                                                              |    |
|-------------------------------------------------------|------------------------------------------|----------|--------------------------------------------------------------|----|
| Renal and Urological Disease                          | chronic renal failure                    | 1.44E-03 | CDKN1A,NOS3,PDE4B,TGFB1,TNFRSF1A                             | 5  |
| Cell Morphology                                       | size of muscle cells                     | 1.44E-03 | ANGPT2,CDKN1A,DYSF,FLNC,TGFB1                                | 5  |
| Skeletal and Muscular System Development and Function | size of muscle cells                     | 1.44E-03 | ANGPT2,CDKN1A,DYSF,FLNC,TGFB1                                | 5  |
| Cell Morphology                                       | shape change of axons                    | 1.51E-03 | CHL1,GRASP,TGFB1,UGCG                                        | 4  |
| Hematological System Development and Function         | quantity of phagocytes                   | 1.56E-03 | CDKN1A,DOK1,ELMO1,HBEGF,HDC,IRAK3,MMP9,PD E4B,TGFB1,TNFRSF1A | 10 |
| Inflammatory Response                                 | quantity of phagocytes                   | 1.56E-03 | CDKN1A,DOK1,ELMO1,HBEGF,HDC,IRAK3,MMP9,PD E4B,TGFB1,TNFRSF1A | 10 |
| Tissue Morphology                                     | quantity of phagocytes                   | 1.56E-03 | CDKN1A,DOK1,ELMO1,HBEGF,HDC,IRAK3,MMP9,PD E4B,TGFB1,TNFRSF1A | 10 |
| Tissue Morphology                                     | quantity of fibroblast cell lines        | 1.57E-03 | CDKN1A,DBC1,TGFB1                                            | 3  |
| Connective Tissue Development and Function            | quantity of fibroblast cell lines        | 1.57E-03 | CDKN1A,DBC1,TGFB1                                            | 3  |
| Organismal Development                                | thickness of cortical bone               | 1.57E-03 | FRZB,HDC,NOS3                                                | 3  |
| Tissue Development                                    | thickness of cortical bone               | 1.57E-03 | FRZB,HDC,NOS3                                                | 3  |
| Embryonic Development                                 | thickness of cortical bone               | 1.57E-03 | FRZB,HDC,NOS3                                                | 3  |
| Organ Development                                     | thickness of cortical bone               | 1.57E-03 | FRZB,HDC,NOS3                                                | 3  |
| Skeletal and Muscular System Development and Function | thickness of cortical bone               | 1.57E-03 | FRZB,HDC,NOS3                                                | 3  |
| Tissue Morphology                                     | thickness of cortical bone               | 1.57E-03 | FRZB,HDC,NOS3                                                | 3  |
| Connective Tissue Development and Function            | thickness of cortical bone               | 1.57E-03 | FRZB,HDC,NOS3                                                | 3  |
| Cell-To-Cell Signaling and Interaction                | activation of embryonic cell lines       | 1.61E-03 | ITGA5,TGFB1                                                  | 2  |
| Embryonic Development                                 | activation of embryonic cell lines       | 1.61E-03 | ITGA5,TGFB1                                                  | 2  |
| Organismal Injury and Abnormalities                   | bleeding of retina                       | 1.61E-03 | ANGPT2,TGFB1                                                 | 2  |
| Ophthalmic Disease                                    | bleeding of retina                       | 1.61E-03 | ANGPT2,TGFB1                                                 | 2  |
| Tissue Development                                    | clustering of tumor cell lines           | 1.61E-03 | CDKN1A,THBD                                                  | 2  |
| Cellular Growth and Proliferation                     | cytostasis of prostate cancer cell lines | 1.61E-03 | CDKN1A,TGFB1                                                 | 2  |
| Organismal Functions                                  | flow of plasma                           | 1.61E-03 | HBEGF,TNFRSF1A                                               | 2  |
| Cellular Movement                                     | migration of dermal fibroblasts          | 1.61E-03 | HBEGF,TGFB1                                                  | 2  |
| Connective Tissue Development and Function            | migration of dermal fibroblasts          | 1.61E-03 | HBEGF,TGFB1                                                  | 2  |
| Tissue Development                                    | organization of endothelial tissue       | 1.61E-03 | EGFL7,HNF4A                                                  | 2  |
| Cellular Assembly and Organization                    | priming of vesicles                      | 1.61E-03 | LMAN1L,STXBP1                                                | 2  |

|                                                                  |                                                |          |                                                                                                          |    |
|------------------------------------------------------------------|------------------------------------------------|----------|----------------------------------------------------------------------------------------------------------|----|
| Cardiovascular System<br>Development and<br>Function             | proliferation of cardiac fibroblasts           | 1.61E-03 | TGFB1,WISP1                                                                                              | 2  |
| Cellular Development<br>Cellular Growth and<br>Proliferation     | proliferation of cardiac fibroblasts           | 1.61E-03 | TGFB1,WISP1                                                                                              | 2  |
| Connective Tissue<br>Development and<br>Function                 | proliferation of cardiac fibroblasts           | 1.61E-03 | TGFB1,WISP1                                                                                              | 2  |
| Amino Acid<br>Metabolism                                         | synthesis of basic amino acid                  | 1.61E-03 | NOS3,TGFB1                                                                                               | 2  |
| Small Molecule<br>Biochemistry                                   | synthesis of basic amino acid                  | 1.61E-03 | NOS3,TGFB1                                                                                               | 2  |
| Cardiovascular Disease<br>Organismal Injury and<br>Abnormalities | systolic dysfunction of heart                  | 1.61E-03 | ITGA5,TGFB1                                                                                              | 2  |
|                                                                  | systolic dysfunction of heart                  | 1.61E-03 | ITGA5,TGFB1                                                                                              | 2  |
| Cellular Movement                                                | cell movement of phagocytes                    | 1.63E-03 | ANGPT2,CDKN1A,ITGA5,LRRK2,MMP9,PDE4B,PECA<br>M1,PIP5K1C,PLXND1,ST3GAL4,TGFB1,TNFRSF1A                    | 12 |
| Hematological System<br>Development and<br>Function              | cell movement of phagocytes                    | 1.63E-03 | ANGPT2,CDKN1A,ITGA5,LRRK2,MMP9,PDE4B,PECA<br>M1,PIP5K1C,PLXND1,ST3GAL4,TGFB1,TNFRSF1A                    | 12 |
| Immune Cell<br>Trafficking                                       | cell movement of phagocytes                    | 1.63E-03 | ANGPT2,CDKN1A,ITGA5,LRRK2,MMP9,PDE4B,PECA<br>M1,PIP5K1C,PLXND1,ST3GAL4,TGFB1,TNFRSF1A                    | 12 |
| Inflammatory<br>Response                                         | cell movement of phagocytes                    | 1.63E-03 | ANGPT2,CDKN1A,ITGA5,LRRK2,MMP9,PDE4B,PECA<br>M1,PIP5K1C,PLXND1,ST3GAL4,TGFB1,TNFRSF1A                    | 12 |
| Cardiovascular System<br>Development and<br>Function             | proliferation of vascular endothelial<br>cells | 1.63E-03 | ANGPT2,CDKN1A,DAB2,KLF2,PDE2A                                                                            | 5  |
| Organismal<br>Development                                        | proliferation of vascular endothelial<br>cells | 1.63E-03 | ANGPT2,CDKN1A,DAB2,KLF2,PDE2A                                                                            | 5  |
| Tissue Development                                               | proliferation of vascular endothelial<br>cells | 1.63E-03 | ANGPT2,CDKN1A,DAB2,KLF2,PDE2A                                                                            | 5  |
| Cellular Development<br>Cellular Growth and<br>Proliferation     | proliferation of vascular endothelial<br>cells | 1.63E-03 | ANGPT2,CDKN1A,DAB2,KLF2,PDE2A                                                                            | 5  |
| Cellular Development<br>Cellular Growth and<br>Proliferation     | proliferation of vascular endothelial<br>cells | 1.63E-03 | ANGPT2,CDKN1A,DAB2,KLF2,PDE2A                                                                            | 5  |
| Cancer                                                           | genital tumor                                  | 1.67E-03 | ADAM9,ANO6,ASPH,CAMK2N2,CDKN1A,CP,DAB2,EG<br>FL7,FLNC,H19,KCNK6,MMP9,NES,NOS3,SMO,TGFB1,<br>TUBA1A,TUBB6 | 18 |
| Reproductive System<br>Disease                                   | genital tumor                                  | 1.67E-03 | ADAM9,ANO6,ASPH,CAMK2N2,CDKN1A,CP,DAB2,EG<br>FL7,FLNC,H19,KCNK6,MMP9,NES,NOS3,SMO,TGFB1,<br>TUBA1A,TUBB6 | 18 |
| Cell Death and Survival                                          | fragmentation of nucleus                       | 1.73E-03 | PECAM1,TGFB1,TNFRSF1A                                                                                    | 3  |
| Cellular Compromise<br>Cancer                                    | fragmentation of nucleus                       | 1.73E-03 | PECAM1,TGFB1,TNFRSF1A                                                                                    | 3  |
| Skeletal and Muscular<br>Disorders                               | hyperplasia of muscle                          | 1.73E-03 | CYR61,NOS3,TGFB1                                                                                         | 3  |
|                                                                  | hyperplasia of muscle                          | 1.73E-03 | CYR61,NOS3,TGFB1                                                                                         | 3  |

|                                                       |                                     |          |                                                                       |    |
|-------------------------------------------------------|-------------------------------------|----------|-----------------------------------------------------------------------|----|
| Cancer                                                | pancreatic tumor                    | 1.75E-03 | ADAM9,ADAMTS1,CDKN1A,CYR61,HBEGF,IFITM1,MP9,TGFB1,TUBA1A              | 9  |
| Endocrine System Disorders                            | pancreatic tumor                    | 1.75E-03 | ADAM9,ADAMTS1,CDKN1A,CYR61,HBEGF,IFITM1,MP9,TGFB1,TUBA1A              | 9  |
| Gastrointestinal Disease                              | pancreatic tumor                    | 1.75E-03 | ADAM9,ADAMTS1,CDKN1A,CYR61,HBEGF,IFITM1,MP9,TGFB1,TUBA1A              | 9  |
| Renal and Urological Disease                          | renal failure                       | 1.78E-03 | CDKN1A,CYR61,NOS3,PDE4B,TGFB1,TNFRSF1A                                | 6  |
| Organismal Development                                | morphology of bone                  | 1.82E-03 | CDKN1A,CSGALNACT1,FRZB,H19,IRAK3,KLF2,MMP9,NOS3,PLXND1,TGFB1,TNFRSF1A | 11 |
| Tissue Development Embryonic                          | morphology of bone                  | 1.82E-03 | CDKN1A,CSGALNACT1,FRZB,H19,IRAK3,KLF2,MMP9,NOS3,PLXND1,TGFB1,TNFRSF1A | 11 |
| Development                                           | morphology of bone                  | 1.82E-03 | CDKN1A,CSGALNACT1,FRZB,H19,IRAK3,KLF2,MMP9,NOS3,PLXND1,TGFB1,TNFRSF1A | 11 |
| Organ Development                                     | morphology of bone                  | 1.82E-03 | CDKN1A,CSGALNACT1,FRZB,H19,IRAK3,KLF2,MMP9,NOS3,PLXND1,TGFB1,TNFRSF1A | 11 |
| Organ Morphology                                      | morphology of bone                  | 1.82E-03 | CDKN1A,CSGALNACT1,FRZB,H19,IRAK3,KLF2,MMP9,NOS3,PLXND1,TGFB1,TNFRSF1A | 11 |
| Skeletal and Muscular System Development and Function | morphology of bone                  | 1.82E-03 | CDKN1A,CSGALNACT1,FRZB,H19,IRAK3,KLF2,MMP9,NOS3,PLXND1,TGFB1,TNFRSF1A | 11 |
| Connective Tissue Development and Function            | morphology of bone                  | 1.82E-03 | CDKN1A,CSGALNACT1,FRZB,H19,IRAK3,KLF2,MMP9,NOS3,PLXND1,TGFB1,TNFRSF1A | 11 |
| Cellular Movement                                     | migration of mononuclear leukocytes | 1.89E-03 | HDC,ITGA5,KLF2,MMP9,PECAM1,PIP5K1C,RAP1GAP,TGFB1,TNFRSF1A             | 9  |
| Hematological System Development and Function         | migration of mononuclear leukocytes | 1.89E-03 | HDC,ITGA5,KLF2,MMP9,PECAM1,PIP5K1C,RAP1GAP,TGFB1,TNFRSF1A             | 9  |
| Immune Cell Trafficking                               | migration of mononuclear leukocytes | 1.89E-03 | HDC,ITGA5,KLF2,MMP9,PECAM1,PIP5K1C,RAP1GAP,TGFB1,TNFRSF1A             | 9  |
| Hematological System Development and Function         | coagulation of blood                | 1.89E-03 | HNF4A,NOS3,PECAM1,ST3GAL4,THBD,VWF                                    | 6  |
| Organismal Functions                                  | coagulation of blood                | 1.89E-03 | HNF4A,NOS3,PECAM1,ST3GAL4,THBD,VWF                                    | 6  |
| Organismal Development                                | abnormal morphology of femur        | 1.89E-03 | CSGALNACT1,FRZB,MMP9,NOS3                                             | 4  |
| Tissue Development Embryonic                          | abnormal morphology of femur        | 1.89E-03 | CSGALNACT1,FRZB,MMP9,NOS3                                             | 4  |
| Development                                           | abnormal morphology of femur        | 1.89E-03 | CSGALNACT1,FRZB,MMP9,NOS3                                             | 4  |
| Organ Development                                     | abnormal morphology of femur        | 1.89E-03 | CSGALNACT1,FRZB,MMP9,NOS3                                             | 4  |
| Organ Morphology                                      | abnormal morphology of femur        | 1.89E-03 | CSGALNACT1,FRZB,MMP9,NOS3                                             | 4  |
| Skeletal and Muscular System Development and Function | abnormal morphology of femur        | 1.89E-03 | CSGALNACT1,FRZB,MMP9,NOS3                                             | 4  |
| Connective Tissue Development and Function            | abnormal morphology of femur        | 1.89E-03 | CSGALNACT1,FRZB,MMP9,NOS3                                             | 4  |

|                                                            |                                            |          |                                                             |   |
|------------------------------------------------------------|--------------------------------------------|----------|-------------------------------------------------------------|---|
| Cardiovascular System<br>Development and<br>Function       | neovascularization of eye                  | 1.89E-03 | ADAM9,CYR61,MMP9,NOS3                                       | 4 |
| Organismal<br>Development                                  | neovascularization of eye                  | 1.89E-03 | ADAM9,CYR61,MMP9,NOS3                                       | 4 |
| Visual System<br>Development and<br>Function               | neovascularization of eye                  | 1.89E-03 | ADAM9,CYR61,MMP9,NOS3                                       | 4 |
| Cardiovascular System<br>Development and<br>Function       | tubulation of endothelial cells            | 1.89E-03 | ANGPTL4,CYR61,RCAN1,RHOJ                                    | 4 |
| Organismal<br>Development                                  | tubulation of endothelial cells            | 1.89E-03 | ANGPTL4,CYR61,RCAN1,RHOJ                                    | 4 |
| Tissue Development                                         | tubulation of endothelial cells            | 1.89E-03 | ANGPTL4,CYR61,RCAN1,RHOJ                                    | 4 |
| Cellular Development                                       | tubulation of endothelial cells            | 1.89E-03 | ANGPTL4,CYR61,RCAN1,RHOJ                                    | 4 |
| Cell Morphology                                            | tubulation of endothelial cells            | 1.89E-03 | ANGPTL4,CYR61,RCAN1,RHOJ                                    | 4 |
| Cellular Function and<br>Maintenance                       | function of cardiomyocytes                 | 1.90E-03 | ASPH,MMP9,NOS3                                              | 3 |
| Endocrine System<br>Development and<br>Function            | insulin sensitivity index                  | 1.90E-03 | CDKN1A,HBEGF,TNFRSF1A                                       | 3 |
| Cellular Development                                       | proliferation of bladder cancer cell lines | 1.90E-03 | CDKN1A,DBC1,HBEGF                                           | 3 |
| Cellular Growth and<br>Proliferation                       | proliferation of bladder cancer cell lines | 1.90E-03 | CDKN1A,DBC1,HBEGF                                           | 3 |
| Cellular Movement                                          | cell movement of neutrophils               | 1.95E-03 | ANGPT2,MMP9,PDE4B,PECAM1,PIP5K1C,ST3GAL4,T<br>GFB1,TNFRSF1A | 8 |
| Hematological System<br>Development and<br>Function        | cell movement of neutrophils               | 1.95E-03 | ANGPT2,MMP9,PDE4B,PECAM1,PIP5K1C,ST3GAL4,T<br>GFB1,TNFRSF1A | 8 |
| Immune Cell<br>Trafficking                                 | cell movement of neutrophils               | 1.95E-03 | ANGPT2,MMP9,PDE4B,PECAM1,PIP5K1C,ST3GAL4,T<br>GFB1,TNFRSF1A | 8 |
| Inflammatory<br>Response                                   | cell movement of neutrophils               | 1.95E-03 | ANGPT2,MMP9,PDE4B,PECAM1,PIP5K1C,ST3GAL4,T<br>GFB1,TNFRSF1A | 8 |
| Organismal Injury and<br>Abnormalities                     | thrombus                                   | 2.00E-03 | PECAM1,THBD,TNFRSF1A,VWF                                    | 4 |
| Cell-To-Cell Signaling<br>and Interaction                  | activation of kidney cell lines            | 2.06E-03 | ITGA5,TGFB1                                                 | 2 |
| Renal and Urological<br>System Development<br>and Function | activation of kidney cell lines            | 2.06E-03 | ITGA5,TGFB1                                                 | 2 |
| Cellular Movement                                          | migration of megakaryocytes                | 2.06E-03 | MMP9,PECAM1                                                 | 2 |
| Hematological System<br>Development and<br>Function        | migration of megakaryocytes                | 2.06E-03 | MMP9,PECAM1                                                 | 2 |
| Immune Cell<br>Trafficking                                 | migration of megakaryocytes                | 2.06E-03 | MMP9,PECAM1                                                 | 2 |
| Inflammatory<br>Response                                   | migration of megakaryocytes                | 2.06E-03 | MMP9,PECAM1                                                 | 2 |
| Hematopoiesis                                              | migration of megakaryocytes                | 2.06E-03 | MMP9,PECAM1                                                 | 2 |



|                                             |                                                                       |          |                                                                                                                                                                              |         |
|---------------------------------------------|-----------------------------------------------------------------------|----------|------------------------------------------------------------------------------------------------------------------------------------------------------------------------------|---------|
| Amino Acid Metabolism                       | oxidation of L-amino acid                                             | 2.06E-03 | CP,NOS3                                                                                                                                                                      | 2       |
| Small Molecule Biochemistry                 | oxidation of L-amino acid                                             | 2.06E-03 | CP,NOS3                                                                                                                                                                      | 2       |
| Energy Production                           | oxidation of L-amino acid                                             | 2.06E-03 | CP,NOS3                                                                                                                                                                      | 2       |
| Post-Translational Modification             | oxidation of L-amino acid                                             | 2.06E-03 | CP,NOS3                                                                                                                                                                      | 2       |
| Infectious Disease                          | reactivation of human herpesvirus 4                                   | 2.06E-03 | TGFB1,ZEB1                                                                                                                                                                   | 2       |
| Cardiovascular Disease                      | thrombosis of atrium                                                  | 2.06E-03 | HBEGF,TGFB1                                                                                                                                                                  | 2       |
| Hematological Disease                       | thrombosis of atrium                                                  | 2.06E-03 | HBEGF,TGFB1                                                                                                                                                                  | 2       |
| Cellular Growth and Proliferation           | formation of connective tissue cells                                  | 2.06E-03 | CDKN1A,FRZB,ITGA5,TGFB1,TNFRSF1A                                                                                                                                             | 5       |
| Molecular Transport                         | excretion of Na+                                                      | 2.08E-03 | ANGPT2,NOS3,TGFB1                                                                                                                                                            | 3       |
| Cellular Growth and Proliferation           | proliferation of lung cells                                           | 2.08E-03 | ITGA5,TGFB1,TNFRSF1A                                                                                                                                                         | 3       |
| Respiratory System Development and Function | proliferation of lung cells                                           | 2.08E-03 | ITGA5,TGFB1,TNFRSF1A<br>ANGPT2,CDKN1A,HBEGF,KLF2,MMP9,NOS3,PDE4B,P<br>LXND1,RCAN1,SLC16A6,TGFB1,THBD,TNFRSF1A,VW<br>F                                                        | 3<br>14 |
| Cardiovascular Disease                      | vascular disease                                                      | 2.10E-03 | ANGPT2,CDKN1A,CREM (includes<br>EG:12916),CYR61,HBEGF,ITGA5,KLF2,RAP1GAP,TGFB<br>1,TNFRSF1A                                                                                  | 10      |
| DNA Replication, Recombination, and Repair  | synthesis of DNA<br>experimental autoimmune                           | 2.12E-03 |                                                                                                                                                                              | 10      |
| Inflammatory Disease                        | encephalomyelitis                                                     | 2.12E-03 | HDC,MMP9,PECAM1,RFTN1,TGFB1,TNFRSF1A,VWF                                                                                                                                     | 7       |
| Immunological Disease                       | experimental autoimmune<br>encephalomyelitis                          | 2.12E-03 | HDC,MMP9,PECAM1,RFTN1,TGFB1,TNFRSF1A,VWF                                                                                                                                     | 7       |
| Neurological Disease                        | experimental autoimmune<br>encephalomyelitis                          | 2.12E-03 | HDC,MMP9,PECAM1,RFTN1,TGFB1,TNFRSF1A,VWF<br>CDKN1A,CHL1,CREM (includes<br>EG:12916),FAIM2,HAP1 (includes<br>EG:15114),ITGA5,LRRK2,MMP9,RCAN1,STXBP1,TGFB<br>1,TNFRSF1A,TSHZ3 | 7<br>13 |
| Cell Death and Survival                     | neuronal cell death                                                   | 2.19E-03 | ADAM9,ANO6,ASPH,CDKN1A,EGFL7,FLNC,MMP9,NE<br>S,NOS3,TGFB1,TUBA1A,TUBB6                                                                                                       | 12      |
| Cancer                                      | prostatic tumor                                                       | 2.19E-03 | ADAM9,ANO6,ASPH,CDKN1A,EGFL7,FLNC,MMP9,NE<br>S,NOS3,TGFB1,TUBA1A,TUBB6                                                                                                       | 12      |
| Reproductive System Disease                 | prostatic tumor                                                       | 2.19E-03 | ANGPT2,CREM (includes<br>EG:12916),HBEGF,LMCD1,MMP9                                                                                                                          | 5       |
| Cardiovascular Disease                      | hypertrophy of cardiomyocytes                                         | 2.22E-03 | ANGPT2,CREM (includes<br>EG:12916),HBEGF,LMCD1,MMP9                                                                                                                          | 5       |
| Developmental Disorder                      | hypertrophy of cardiomyocytes                                         | 2.22E-03 | ANGPT2,CREM (includes<br>EG:12916),HBEGF,LMCD1,MMP9                                                                                                                          | 5       |
| Skeletal and Muscular Disorders             | hypertrophy of cardiomyocytes<br>cell death of macrophage cancer cell | 2.22E-03 | ANGPT2,CREM (includes<br>EG:12916),HBEGF,LMCD1,MMP9                                                                                                                          | 5       |
| Cell Death and Survival Organismal          | lines                                                                 | 2.27E-03 | ITGA5,TGFB1,TNFRSF1A<br>CDKN1A,HBEGF,KLF2,NOS3,PECAM1,TGFB1,TNFRSF<br>1A,TSHZ3                                                                                               | 3<br>8  |
| Development                                 | lung development                                                      | 2.30E-03 | CDKN1A,HBEGF,KLF2,NOS3,PECAM1,TGFB1,TNFRSF<br>1A,TSHZ3                                                                                                                       | 8       |
| Tissue Development Embryonic                | lung development                                                      | 2.30E-03 | CDKN1A,HBEGF,KLF2,NOS3,PECAM1,TGFB1,TNFRSF<br>1A,TSHZ3                                                                                                                       | 8       |
| Development                                 | lung development                                                      | 2.30E-03 | CDKN1A,HBEGF,KLF2,NOS3,PECAM1,TGFB1,TNFRSF<br>1A,TSHZ3                                                                                                                       | 8       |
| Organ Development                           | lung development                                                      | 2.30E-03 | CDKN1A,HBEGF,KLF2,NOS3,PECAM1,TGFB1,TNFRSF<br>1A,TSHZ3                                                                                                                       | 8       |

|                                                       |                                                                    |          |                                                                                                                                          |    |
|-------------------------------------------------------|--------------------------------------------------------------------|----------|------------------------------------------------------------------------------------------------------------------------------------------|----|
| Respiratory System Development and Function           | lung development                                                   | 2.30E-03 | CDKN1A,HBEGF,KLF2,NOS3,PECAM1,TGFB1,TNFRSF1A,TSHZ3                                                                                       | 8  |
| Cell Death and Survival                               | apoptosis of hepatocytes                                           | 2.31E-03 | CDKN1A,HNF4A,SLC20A1,TGFB1,TNFRSF1A                                                                                                      | 5  |
| Tissue Development                                    | cell-cell adhesion                                                 | 2.31E-03 | DAB2,ITGA5,RAP1GAP,TGFB1,ZEB1                                                                                                            | 5  |
| Cell-To-Cell Signaling and Interaction                | cell-cell adhesion                                                 | 2.31E-03 | DAB2,ITGA5,RAP1GAP,TGFB1,ZEB1                                                                                                            | 5  |
| Cellular Growth and Proliferation                     | formation of cells                                                 | 2.31E-03 | ANGPTL4,CDKN1A,EGFL7,FRZB,ITGA5,NOS3,PECAM1,TGFB1,TNFRSF1A                                                                               | 9  |
| Organ Morphology                                      | mass of muscle                                                     | 2.33E-03 | CDKN1A,FLNC,HBEGF,MMP9                                                                                                                   | 4  |
| Skeletal and Muscular System Development and Function | mass of muscle                                                     | 2.33E-03 | CDKN1A,FLNC,HBEGF,MMP9                                                                                                                   | 4  |
| Cancer                                                | development of tumor proliferation of vascular smooth muscle cells | 2.35E-03 | ADAMTS1,ANGPTL4,CDKN1A,MAP3K6,MMP9,TGFB1,THBD,WISP1                                                                                      | 8  |
| Cellular Development                                  | muscle cells                                                       | 2.39E-03 | ANGPT2,CDKN1A,MMP9,TGFB1,TNFRSF1A                                                                                                        | 5  |
| Cellular Growth and Proliferation                     | proliferation of vascular smooth muscle cells                      | 2.39E-03 | ANGPT2,CDKN1A,MMP9,TGFB1,TNFRSF1A                                                                                                        | 5  |
| Skeletal and Muscular System Development and Function | proliferation of vascular smooth muscle cells                      | 2.39E-03 | ANGPT2,CDKN1A,MMP9,TGFB1,TNFRSF1A                                                                                                        | 5  |
| Cellular Movement                                     | chemotaxis of leukocytes                                           | 2.40E-03 | ANGPT2,CDKN1A,LRRK2,MMP9,PDE4B,PIP5K1C,RAP1GAP,TGFB1,TNFRSF1A                                                                            | 9  |
| Hematological System Development and Function         | chemotaxis of leukocytes                                           | 2.40E-03 | ANGPT2,CDKN1A,LRRK2,MMP9,PDE4B,PIP5K1C,RAP1GAP,TGFB1,TNFRSF1A                                                                            | 9  |
| Immune Cell Trafficking                               | chemotaxis of leukocytes                                           | 2.40E-03 | ANGPT2,CDKN1A,LRRK2,MMP9,PDE4B,PIP5K1C,RAP1GAP,TGFB1,TNFRSF1A                                                                            | 9  |
| Inflammatory Response                                 | chemotaxis of leukocytes                                           | 2.40E-03 | ANGPT2,CDKN1A,LRRK2,MMP9,PDE4B,PIP5K1C,RAP1GAP,TGFB1,TNFRSF1A                                                                            | 9  |
| Organismal Injury and Abnormalities                   | interstitial fibrosis                                              | 2.46E-03 | ANGPT2,NOS3,TGFB1,TNFRSF1A                                                                                                               | 4  |
| Behavior                                              | behavior                                                           | 2.46E-03 | ADAM9,BIN1,CDKN1A,CHL1,CREM (includes EG:12916),CYR61,GRASP,HAP1 (includes EG:15114),HDC,IFITM1,ITGA5,LRRK2,MMP9,NOS3,NPW,RCAN1,TNFRSF1A | 17 |
| Cardiovascular System Development and Function        | cardiac output                                                     | 2.47E-03 | ANGPT2,MMP9,NOS3                                                                                                                         | 3  |
| Tissue Morphology                                     | quantity of oocytes                                                | 2.47E-03 | ADAMTS1,NOS3,TGFB1                                                                                                                       | 3  |
| Reproductive System Development and Function          | quantity of oocytes                                                | 2.47E-03 | ADAMTS1,NOS3,TGFB1                                                                                                                       | 3  |
| Small Molecule Biochemistry                           | synthesis of nitrite                                               | 2.47E-03 | NOS3,TGFB1,TNFRSF1A                                                                                                                      | 3  |
| Cardiovascular System Development and Function        | abnormal morphology of pulmonary valve                             | 2.56E-03 | ADAM9,HBEGF                                                                                                                              | 2  |

|                                                       |                                                      |          |                                                       |   |
|-------------------------------------------------------|------------------------------------------------------|----------|-------------------------------------------------------|---|
| Organ Morphology                                      | abnormal morphology of pulmonary valve               | 2.56E-03 | ADAM9,HBEGF                                           | 2 |
| Molecular Transport                                   | accumulation of anion                                | 2.56E-03 | SLC5A5,TNFRSF1A                                       | 2 |
| Cell Death and Survival                               | anoikis of breast cancer cell lines                  | 2.56E-03 | DAB2,TGFB1                                            | 2 |
| Cell-To-Cell Signaling and Interaction                | contact growth inhibition of connective tissue cells | 2.56E-03 | CDKN1A,TGFB1                                          | 2 |
| Cellular Growth and Proliferation                     | contact growth inhibition of connective tissue cells | 2.56E-03 | CDKN1A,TGFB1                                          | 2 |
| Cell Cycle                                            | contact growth inhibition of connective tissue cells | 2.56E-03 | CDKN1A,TGFB1                                          | 2 |
| Organismal Development                                | differentiation of epidermis                         | 2.56E-03 | CDKN1A,GLIS1                                          | 2 |
| Tissue Development                                    | differentiation of epidermis                         | 2.56E-03 | CDKN1A,GLIS1                                          | 2 |
| Embryonic Development                                 | differentiation of epidermis                         | 2.56E-03 | CDKN1A,GLIS1                                          | 2 |
| Organ Development                                     | differentiation of epidermis                         | 2.56E-03 | CDKN1A,GLIS1                                          | 2 |
| Cellular Development                                  | differentiation of epidermis                         | 2.56E-03 | CDKN1A,GLIS1                                          | 2 |
| Hair and Skin Development and Function                | differentiation of epidermis                         | 2.56E-03 | CDKN1A,GLIS1                                          | 2 |
| Cell-To-Cell Signaling and Interaction                | glutamate mediated receptor currents                 | 2.56E-03 | PIP5K1C,TNFRSF1A                                      | 2 |
| Nervous System Development and Function               | glutamate mediated receptor currents                 | 2.56E-03 | PIP5K1C,TNFRSF1A                                      | 2 |
| Tissue Morphology                                     | lack of chorion                                      | 2.56E-03 | DAB2,HNF4A                                            | 2 |
| Skeletal and Muscular System Development and Function | mitogenesis of smooth muscle cells                   | 2.56E-03 | HBEGF,TGFB1                                           | 2 |
| Cell Cycle                                            | mitogenesis of smooth muscle cells                   | 2.56E-03 | HBEGF,TGFB1                                           | 2 |
| Cardiovascular System Development and Function        | morphology of endothelial cell lines                 | 2.56E-03 | PECAM1,TGFB1                                          | 2 |
| Cell Morphology                                       | morphology of endothelial cell lines                 | 2.56E-03 | PECAM1,TGFB1                                          | 2 |
| Tissue Development                                    | cartilage development                                | 2.57E-03 | CSGALNACT1,CYR61,FRZB,HBEGF,ZEB1                      | 5 |
| Skeletal and Muscular System Development and Function | cartilage development                                | 2.57E-03 | CSGALNACT1,CYR61,FRZB,HBEGF,ZEB1                      | 5 |
| Tissue Development                                    | cell-cell contact                                    | 2.57E-03 | CD93,CYR61,PIP5K1C,PVRL3,TGFB1                        | 5 |
| Cell-To-Cell Signaling and Interaction                | cell-cell contact                                    | 2.57E-03 | CD93,CYR61,PIP5K1C,PVRL3,TGFB1                        | 5 |
| Developmental Disorder                                | muscular hypertrophy                                 | 2.60E-03 | ANGPT2,CREM (includes EG:12916),HBEGF,LMCD1,MMP9,NOS3 | 6 |

|                                                       |                                   |          |                                                       |   |
|-------------------------------------------------------|-----------------------------------|----------|-------------------------------------------------------|---|
| Skeletal and Muscular Disorders                       | muscular hypertrophy              | 2.60E-03 | ANGPT2,CREM (includes EG:12916),HBEGF,LMCD1,MMP9,NOS3 | 6 |
| Cell Death and Survival                               | cell death of lung cells          | 2.67E-03 | IRAK3,MMP9,TGFB1                                      | 3 |
| Cardiovascular Disease                                | formation of thrombus             | 2.67E-03 | PECAM1,THBD,TNFRSF1A                                  | 3 |
| Organismal Injury and Abnormalities                   | formation of thrombus             | 2.67E-03 | PECAM1,THBD,TNFRSF1A                                  | 3 |
| Cellular Function and Maintenance                     | function of endothelial cells     | 2.67E-03 | ATP2A3,ITGA5,NOS3                                     | 3 |
| Cardiovascular Disease                                | myocarditis                       | 2.67E-03 | KLF2,MMP9,TGFB1                                       | 3 |
| Inflammatory Disease                                  | myocarditis                       | 2.67E-03 | KLF2,MMP9,TGFB1                                       | 3 |
| Cellular Growth and Proliferation                     | proliferation of intestinal cells | 2.67E-03 | CDKN1A,HBEGF,MMP9                                     | 3 |
| Cell Morphology                                       | size of skeletal muscle cells     | 2.67E-03 | CDKN1A,DYSF,FLNC                                      | 3 |
| Skeletal and Muscular System Development and Function | size of skeletal muscle cells     | 2.67E-03 | CDKN1A,DYSF,FLNC                                      | 3 |
| Gastrointestinal Disease                              | Crohn's disease                   | 2.68E-03 | GRK5,MMP9,NOS3,PDE4B,SNX20,TNFRSF1A                   | 6 |
| Inflammatory Disease                                  | Crohn's disease                   | 2.68E-03 | GRK5,MMP9,NOS3,PDE4B,SNX20,TNFRSF1A                   | 6 |
| Cardiovascular System Development and Function        | contractility of heart            | 2.68E-03 | ASPH,CREM (includes EG:12916),GRK5,HBEGF,MMP9,NOS3    | 6 |
| Organ Morphology                                      | contractility of heart            | 2.68E-03 | ASPH,CREM (includes EG:12916),GRK5,HBEGF,MMP9,NOS3    | 6 |
| Organismal Development                                | morphology of lung                | 2.75E-03 | CDKN1A,HBEGF,KLF2,NOS3,PECAM1,TGFB1                   | 6 |
| Tissue Development                                    | morphology of lung                | 2.75E-03 | CDKN1A,HBEGF,KLF2,NOS3,PECAM1,TGFB1                   | 6 |
| Embryonic Development                                 | morphology of lung                | 2.75E-03 | CDKN1A,HBEGF,KLF2,NOS3,PECAM1,TGFB1                   | 6 |
| Organ Development                                     | morphology of lung                | 2.75E-03 | CDKN1A,HBEGF,KLF2,NOS3,PECAM1,TGFB1                   | 6 |
| Organ Morphology                                      | morphology of lung                | 2.75E-03 | CDKN1A,HBEGF,KLF2,NOS3,PECAM1,TGFB1                   | 6 |
| Respiratory System Development and Function           | morphology of lung                | 2.75E-03 | CDKN1A,HBEGF,KLF2,NOS3,PECAM1,TGFB1                   | 6 |
| Tissue Development                                    | accumulation of leukocytes        | 2.75E-03 | ANGPT2,HDC,ITGA5,KLF2,MMP9,TGFB1,TNFRSF1A             | 7 |
| Hematological System Development and Function         | accumulation of leukocytes        | 2.75E-03 | ANGPT2,HDC,ITGA5,KLF2,MMP9,TGFB1,TNFRSF1A             | 7 |
| Immune Cell Trafficking                               | accumulation of leukocytes        | 2.75E-03 | ANGPT2,HDC,ITGA5,KLF2,MMP9,TGFB1,TNFRSF1A             | 7 |
| Inflammatory Response                                 | accumulation of leukocytes        | 2.75E-03 | ANGPT2,HDC,ITGA5,KLF2,MMP9,TGFB1,TNFRSF1A             | 7 |
| Cardiovascular Disease                                | cardiomyopathy                    | 2.75E-03 | ANGPT2,BIN1,DYSF,GRK5,PDE4B,RCAN1,TGFB1               | 7 |
| Immunological Disease                                 | delayed hypersensitive reaction   | 2.76E-03 | ANGPT2,IFITM1,MMP9,TGFB1,THBD                         | 5 |

|                                                       |                                                        |          |                                                                                                |    |
|-------------------------------------------------------|--------------------------------------------------------|----------|------------------------------------------------------------------------------------------------|----|
| Tissue Morphology                                     | abnormal morphology of embryonic tissue                | 2.80E-03 | APBB2,DAB2,HNF4A,ITGA5,KLF2,SERPINH1,SLC20A1,SMO,TGFB1,THBD,TNFRSF1A,UGCG                      | 12 |
| Cancer                                                | hyperplasia of epidermis                               | 2.89E-03 | SMO,TGFB1,TNFRSF1A                                                                             | 3  |
| Dermatological Diseases and Conditions                | hyperplasia of epidermis                               | 2.89E-03 | SMO,TGFB1,TNFRSF1A                                                                             | 3  |
| Inflammatory Response                                 | inflammation of heart                                  | 2.89E-03 | NOS3,TGFB1,TNFRSF1A                                                                            | 3  |
| Digestive System Development and Function             | development of digestive system                        | 2.91E-03 | ASPH,ITGA5,MMP9,PVRL3,SLC20A1,SMO,TGFB1,TNFRSF1A,VWF                                           | 9  |
| Cellular Movement                                     | cell movement of endothelial cell lines                | 2.98E-03 | ANGPT2,ANGPTL4,CYR61,TGFB1                                                                     | 4  |
| Cardiovascular System Development and Function        | cell movement of endothelial cell lines                | 2.98E-03 | ANGPT2,ANGPTL4,CYR61,TGFB1                                                                     | 4  |
| Cellular Development                                  | proliferation of endocrine cells                       | 2.98E-03 | ANGPT2,CREM (includes EG:12916),RAP1GAP,TGFB1                                                  | 4  |
| Cellular Growth and Proliferation                     | proliferation of endocrine cells                       | 2.98E-03 | ANGPT2,CREM (includes EG:12916),RAP1GAP,TGFB1                                                  | 4  |
| Molecular Transport                                   | release of nitric oxide                                | 2.98E-03 | ANGPT2,NOS3,TGFB1,THBD                                                                         | 4  |
| Small Molecule Biochemistry                           | release of nitric oxide                                | 2.98E-03 | ANGPT2,NOS3,TGFB1,THBD                                                                         | 4  |
| Cell Signaling                                        | release of nitric oxide                                | 2.98E-03 | ANGPT2,NOS3,TGFB1,THBD                                                                         | 4  |
| Cancer                                                | tumorigenesis of tumor cell lines                      | 3.06E-03 | CAMK2N2,CDKN1A,CYR61,TGFB1,THBD                                                                | 5  |
| Cell Death and Survival                               | apoptosis of neurons                                   | 3.07E-03 | CDKN1A,CHL1,CREM (includes EG:12916),FAIM2,HAP1 (includes EG:15114),MMP9,STXBP1,TGFB1,TNFRSF1A | 9  |
| Cell-To-Cell Signaling and Interaction                | activation of myofibroblasts                           | 3.12E-03 | HNF4A,TGFB1                                                                                    | 2  |
| Skeletal and Muscular System Development and Function | activation of myofibroblasts                           | 3.12E-03 | HNF4A,TGFB1                                                                                    | 2  |
| Cardiovascular System Development and Function        | adhesion of blood vessel                               | 3.12E-03 | NOS3,VWF                                                                                       | 2  |
| Inflammatory Response                                 | allergic inflammation                                  | 3.12E-03 | MMP9,TGFB1                                                                                     | 2  |
| Inflammatory Disease                                  | allergic inflammation                                  | 3.12E-03 | MMP9,TGFB1                                                                                     | 2  |
| Immunological Disease                                 | allergic inflammation                                  | 3.12E-03 | MMP9,TGFB1                                                                                     | 2  |
| Cellular Growth and Proliferation                     | antiproliferative response of cells                    | 3.12E-03 | CDKN1A,HBEGF                                                                                   | 2  |
| Cell Cycle                                            | antiproliferative response of cells                    | 3.12E-03 | CDKN1A,HBEGF                                                                                   | 2  |
| Cellular Development                                  | epithelial-mesenchymal transition of kidney cell lines | 3.12E-03 | TGFB1,ZEB1                                                                                     | 2  |
| Gastrointestinal Disease                              | gastric ulcer                                          | 3.12E-03 | MMP9,TGFB1                                                                                     | 2  |
| Organismal Injury and Abnormalities                   | gastric ulcer                                          | 3.12E-03 | MMP9,TGFB1                                                                                     | 2  |
| Dermatological Diseases and Conditions                | gastric ulcer                                          | 3.12E-03 | MMP9,TGFB1                                                                                     | 2  |

|                                                       |                                            |          |                                                            |   |
|-------------------------------------------------------|--------------------------------------------|----------|------------------------------------------------------------|---|
| Tissue Development                                    | adhesion of cancer cells                   | 3.12E-03 | ADAM9,ITGA5,VWF                                            | 3 |
| Cell-To-Cell Signaling and Interaction                | adhesion of cancer cells                   | 3.12E-03 | ADAM9,ITGA5,VWF                                            | 3 |
| Cellular Compromise                                   | adhesion of cancer cells                   | 3.12E-03 | ADAM9,ITGA5,VWF                                            | 3 |
| Tumor Morphology                                      | adhesion of cancer cells                   | 3.12E-03 | ADAM9,ITGA5,VWF                                            | 3 |
| Tissue Development                                    | adhesion of fibroblast cell lines          | 3.12E-03 | ITGA5,PLXND1,TGFB1                                         | 3 |
| Cell-To-Cell Signaling and Interaction                | adhesion of fibroblast cell lines          | 3.12E-03 | ITGA5,PLXND1,TGFB1                                         | 3 |
| Connective Tissue Development and Function            | adhesion of fibroblast cell lines          | 3.12E-03 | ITGA5,PLXND1,TGFB1                                         | 3 |
| Cellular Growth and Proliferation                     | colony formation of lung cancer cell lines | 3.12E-03 | CDKN1A,CYR61,ZEB1                                          | 3 |
| Cellular Assembly and Organization                    | quantity of smooth muscle cells            | 3.12E-03 | ANGPT2,CDKN1A,KLF2                                         | 3 |
| Cellular Function and Maintenance                     | quantity of smooth muscle cells            | 3.12E-03 | ANGPT2,CDKN1A,KLF2                                         | 3 |
| Skeletal and Muscular System Development and Function | quantity of smooth muscle cells            | 3.12E-03 | ANGPT2,CDKN1A,KLF2                                         | 3 |
| Tissue Morphology                                     | quantity of smooth muscle cells            | 3.12E-03 | ANGPT2,CDKN1A,KLF2                                         | 3 |
| Cancer                                                | tumorigenesis of papilloma                 | 3.12E-03 | CDKN1A,TGFB1,TNFRSF1A                                      | 3 |
| Dermatological Diseases and Conditions                | tumorigenesis of papilloma                 | 3.12E-03 | CDKN1A,TGFB1,TNFRSF1A                                      | 3 |
| Respiratory System Development and Function           | morphology of respiratory system           | 3.22E-03 | ASPH,CDKN1A,HBEGF,KLF2,NOS3,PECAM1,TGFB1                   | 7 |
| Cardiovascular Disease                                | hypertrophy of heart                       | 3.23E-03 | ANGPT2,CDKN1A,HBEGF,NOS3,RCAN1,TGFB1                       | 6 |
| Developmental Disorder                                | hypertrophy of heart                       | 3.23E-03 | ANGPT2,CDKN1A,HBEGF,NOS3,RCAN1,TGFB1                       | 6 |
| Cellular Movement                                     | cell movement of lymphocytes               | 3.29E-03 | HDC,ITGA5,KLF2,MMP9,PECAM1,PIP5K1C,RAP1GAP, TGFB1,TNFRSF1A | 9 |
| Hematological System Development and Function         | cell movement of lymphocytes               | 3.29E-03 | HDC,ITGA5,KLF2,MMP9,PECAM1,PIP5K1C,RAP1GAP, TGFB1,TNFRSF1A | 9 |
| Immune Cell Trafficking                               | cell movement of lymphocytes               | 3.29E-03 | HDC,ITGA5,KLF2,MMP9,PECAM1,PIP5K1C,RAP1GAP, TGFB1,TNFRSF1A | 9 |
| Respiratory Disease                                   | acute respiratory distress syndrome        | 3.37E-03 | ANGPT2,TGFB1,VWF                                           | 3 |
| Inflammatory Disease                                  | acute respiratory distress syndrome        | 3.37E-03 | ANGPT2,TGFB1,VWF                                           | 3 |
| Organismal Injury and Abnormalities                   | acute respiratory distress syndrome        | 3.37E-03 | ANGPT2,TGFB1,VWF                                           | 3 |
| Cardiovascular Disease                                | dysfunction of heart                       | 3.37E-03 | ITGA5,NOS3,TGFB1                                           | 3 |
| Organismal Injury and Abnormalities                   | dysfunction of heart                       | 3.37E-03 | ITGA5,NOS3,TGFB1                                           | 3 |
| Cell Death and Survival                               | apoptosis of ovarian cancer cell lines     | 3.42E-03 | CAMK2N2,CDKN1A,KLF2,UGCG                                   | 4 |

|                                                                       |                                                                                    |                      |                                                                                                                                                                                                                                                            |         |
|-----------------------------------------------------------------------|------------------------------------------------------------------------------------|----------------------|------------------------------------------------------------------------------------------------------------------------------------------------------------------------------------------------------------------------------------------------------------|---------|
| Small Molecule<br>Biochemistry                                        | incorporation of thymidine                                                         | 3.42E-03             | CDKN1A,CREM (includes EG:12916),HBEGF,TGFB1                                                                                                                                                                                                                | 4       |
| DNA Replication,<br>Recombination, and<br>Repair                      | incorporation of thymidine                                                         | 3.42E-03             | CDKN1A,CREM (includes EG:12916),HBEGF,TGFB1                                                                                                                                                                                                                | 4       |
| Nucleic Acid<br>Metabolism                                            | incorporation of thymidine                                                         | 3.42E-03             | CDKN1A,CREM (includes EG:12916),HBEGF,TGFB1<br>ADAM9,ANGPT2,BIN1,CDKN1A,CHL1,CYR61,DAB2,E<br>PHB4,FLNC,FRZB,FSCN1 (includes<br>EG:14086),GRASP,HBEGF,HNF4A,IRAK3,ITGA5,MMP<br>9,NES,NOS3,PECAM1,RFTN1,SMO,TGFB1,THBD,TNF<br>RSF1A,TSHZ3,TUBA1A,ZBTB32,ZEB1 | 4       |
| Cellular Development<br>Cellular Assembly and<br>Organization         | differentiation of cells<br>formation of filopodia                                 | 3.46E-03<br>3.49E-03 | CYR61,PVRL3,TGFB1,TM4SF1,TNFRSF1A                                                                                                                                                                                                                          | 29<br>5 |
| Cellular Function and<br>Maintenance                                  | formation of filopodia                                                             | 3.49E-03             | CYR61,PVRL3,TGFB1,TM4SF1,TNFRSF1A                                                                                                                                                                                                                          | 5       |
| Cell Morphology                                                       | formation of filopodia                                                             | 3.49E-03             | CYR61,PVRL3,TGFB1,TM4SF1,TNFRSF1A                                                                                                                                                                                                                          | 5       |
| Inflammatory<br>Response                                              | inflammatory response                                                              | 3.50E-03             | ANGPT2,CDKN1A,HNF4A,IRAK3,LRRK2,MMP9,NOS3,<br>NPW,PDE4B,PIP5K1C,RAP1GAP,SEMA7A,TGFB1,TNF<br>RSF1A<br>CDKN1A,CREM (includes<br>EG:12916),DYSF,NOS3,TGFB1,THBD,TNFRSF1A,WISP<br>1                                                                            | 14<br>8 |
| Cell Death and Survival<br>Cellular Assembly and<br>Organization      | cell death of muscle cells<br>outgrowth of neurites                                | 3.55E-03<br>3.57E-03 | APBB2,CDKN1A,CHL1,GRK5,HAP1 (includes<br>EG:15114),LRRK2,RAP1GAP,SEMA7A,TUBA1A                                                                                                                                                                             | 9<br>9  |
| Cell Morphology<br>Nervous System<br>Development and<br>Function      | outgrowth of neurites<br>outgrowth of neurites                                     | 3.57E-03<br>3.57E-03 | APBB2,CDKN1A,CHL1,GRK5,HAP1 (includes<br>EG:15114),LRRK2,RAP1GAP,SEMA7A,TUBA1A                                                                                                                                                                             | 9<br>9  |
| Cell Death and Survival                                               | cell death of lymphoma cell lines                                                  | 3.59E-03             | CDKN1A,PDE4B,RAP1GAP,TGFB1,TNFRSF1A,UGCG<br>ANGPTL4,CDKN1A,CHL1,DOK1,MMP9,SMO,TNFRSF1<br>A,TUBA1A                                                                                                                                                          | 6<br>8  |
| Cancer                                                                | sarcoma                                                                            | 3.68E-03             | CDKN1A,ELMO1,HBEGF,MMP9,NES,TNFRSF1A                                                                                                                                                                                                                       | 6       |
| Cancer                                                                | neuroepithelial tumor                                                              | 3.68E-03             | CDKN1A,ELMO1,HBEGF,MMP9,NES,TNFRSF1A                                                                                                                                                                                                                       | 6       |
| Cardiovascular Disease                                                | cardiomyopathy of heart                                                            | 3.72E-03             | GRK5,RCAN1                                                                                                                                                                                                                                                 | 2       |
| Cellular Movement<br>Nervous System<br>Development and<br>Function    | chemotaxis of nervous tissue cell lines<br>chemotaxis of nervous tissue cell lines | 3.72E-03<br>3.72E-03 | ANGPT2,TGFB1                                                                                                                                                                                                                                               | 2<br>2  |
| Cellular Development<br>Hepatic System<br>Development and<br>Function | differentiation of hepatocytes<br>differentiation of hepatocytes                   | 3.72E-03<br>3.72E-03 | FRZB,HNF4A                                                                                                                                                                                                                                                 | 2<br>2  |
| Cellular Development                                                  | epithelial-mesenchymal transition of<br>epithelial cell lines                      | 3.72E-03             | TGFB1,ZEB1                                                                                                                                                                                                                                                 | 2       |
| Cellular Movement<br>Embryonic<br>Development                         | invasion of bladder cancer cell lines<br>morphology of visceral endoderm           | 3.72E-03<br>3.72E-03 | DAB2,TGFB1                                                                                                                                                                                                                                                 | 2<br>2  |
| Tissue Morphology                                                     | morphology of visceral endoderm                                                    | 3.72E-03             | DAB2,SERPINH1                                                                                                                                                                                                                                              | 2       |
| Amino Acid<br>Metabolism                                              | synthesis of essential amino acids                                                 | 3.72E-03             | NOS3,TGFB1                                                                                                                                                                                                                                                 | 2       |
| Small Molecule<br>Biochemistry                                        | synthesis of essential amino acids                                                 | 3.72E-03             | NOS3,TGFB1                                                                                                                                                                                                                                                 | 2       |

|                                                |                                          |          |                                                                                                                                                                       |    |
|------------------------------------------------|------------------------------------------|----------|-----------------------------------------------------------------------------------------------------------------------------------------------------------------------|----|
| Embryonic Development                          | apoptosis of embryonic cells             | 3.74E-03 | ITGA5,PLCD3,SMO,TGFB1                                                                                                                                                 | 4  |
| Cell Death and Survival                        | apoptosis of embryonic cells             | 3.74E-03 | ITGA5,PLCD3,SMO,TGFB1                                                                                                                                                 | 4  |
| Cardiovascular Disease Developmental Disorder  | hypertrophy of heart ventricle           | 3.74E-03 | ANGPT2,CREM (includes EG:12916),NOS3,RCAN1                                                                                                                            | 4  |
| Cellular Movement                              | Lymphocyte migration                     | 3.74E-03 | ANGPT2,CREM (includes EG:12916),NOS3,RCAN1<br>HDC,ITGA5,KLF2,PECAM1,PIP5K1C,RAP1GAP,TGFB1,<br>TNFRSF1A                                                                | 8  |
| Hematological System Development and Function  | Lymphocyte migration                     | 3.82E-03 | HDC,ITGA5,KLF2,PECAM1,PIP5K1C,RAP1GAP,TGFB1,<br>TNFRSF1A                                                                                                              | 8  |
| Immune Cell Trafficking                        | Lymphocyte migration                     | 3.82E-03 | HDC,ITGA5,KLF2,PECAM1,PIP5K1C,RAP1GAP,TGFB1,<br>TNFRSF1A                                                                                                              | 8  |
| Cardiovascular System Development and Function | neovascularization                       | 3.85E-03 | ADAM9,CYR61,MMP9,NOS3,TGFB1                                                                                                                                           | 5  |
| Renal and Urological Disease                   | interstitial fibrosis of kidney          | 3.88E-03 | NOS3,TGFB1,TNFRSF1A                                                                                                                                                   | 3  |
| Organismal Injury and Abnormalities            | interstitial fibrosis of kidney          | 3.88E-03 | NOS3,TGFB1,TNFRSF1A                                                                                                                                                   | 3  |
| Cellular Function and Maintenance              | engulfment of cells                      | 3.89E-03 | BIN1,CD93,DAB2,ELMO1,KLF2,PECAM1,PIP5K1C,TGF<br>B1                                                                                                                    | 8  |
| Renal and Urological Disease                   | end stage renal disease                  | 3.91E-03 | NOS3,PDE4B,TGFB1,TNFRSF1A                                                                                                                                             | 4  |
| Cardiovascular System Development and Function | proliferation of endothelial cell lines  | 4.08E-03 | ADAMTS1,CDKN1A,TGFB1,TNFRSF1A                                                                                                                                         | 4  |
| Cellular Development                           | proliferation of endothelial cell lines  | 4.08E-03 | ADAMTS1,CDKN1A,TGFB1,TNFRSF1A                                                                                                                                         | 4  |
| Cellular Growth and Proliferation              | proliferation of endothelial cell lines  | 4.08E-03 | ADAMTS1,CDKN1A,TGFB1,TNFRSF1A<br>ANGPT2,CDKN1A,HDC,ITGA5,KLF2,MMP9,TGFB1,TN<br>FRSF1A                                                                                 | 4  |
| Tissue Development                             | accumulation of cells                    | 4.11E-03 | FRSF1A                                                                                                                                                                | 8  |
| Cellular Function and Maintenance              | clearance of cells                       | 4.16E-03 | ELMO1,HDC,PECAM1                                                                                                                                                      | 3  |
| Cell Death and Survival                        | clearance of cells                       | 4.16E-03 | ELMO1,HDC,PECAM1                                                                                                                                                      | 3  |
| Cancer                                         | hyperplasia                              | 4.22E-03 | CDKN1A,CP,CYR61,DOK1,HBEGF,MMP9,NOS3,RANB<br>P1,SMO,TGFB1,TNFRSF1A,ZBTB32                                                                                             | 12 |
| Cellular Movement                              | cell movement of connective tissue cells | 4.28E-03 | ANGPT2,CDKN1A,CYR61,HBEGF,NOS3,TGFB1                                                                                                                                  | 6  |
| Cellular Movement                              | cell movement of myeloid cells           | 4.31E-03 | ANGPT2,CDKN1A,LRRK2,MMP9,PDE4B,PECAM1,PIP<br>5K1C,PLXND1,ST3GAL4,TGFB1,TNFRSF1A                                                                                       | 11 |
| Hematological System Development and Function  | cell movement of myeloid cells           | 4.31E-03 | ANGPT2,CDKN1A,LRRK2,MMP9,PDE4B,PECAM1,PIP<br>5K1C,PLXND1,ST3GAL4,TGFB1,TNFRSF1A                                                                                       | 11 |
| Immune Cell Trafficking                        | cell movement of myeloid cells           | 4.31E-03 | ANGPT2,CDKN1A,LRRK2,MMP9,PDE4B,PECAM1,PIP<br>5K1C,PLXND1,ST3GAL4,TGFB1,TNFRSF1A                                                                                       | 11 |
| Cell Death and Survival                        | apoptosis of tumor cell lines            | 4.35E-03 | ANGPT2,CAMK2N2,CDKN1A,CREM (includes<br>EG:12916),CYR61,DAB2,EPHB4,HAP1 (includes<br>EG:15114),HBEGF,KLF2,MMP9,NOS3,PDE4B,PECAM<br>1,ST3GAL1,TGFB1,TNFRSF1A,UGCG,ZEB1 | 19 |



|                         |                                         |          |                                                                  |    |
|-------------------------|-----------------------------------------|----------|------------------------------------------------------------------|----|
| Cell Death and Survival | apoptosis of renal tubule               | 4.38E-03 | LRRK2,NOS3                                                       | 2  |
| Renal and Urological    |                                         |          |                                                                  |    |
| Disease                 | damage of tubulointerstitium            | 4.38E-03 | HBEGF,TGFB1                                                      | 2  |
| Organismal Injury and   |                                         |          |                                                                  |    |
| Abnormalities           | damage of tubulointerstitium            | 4.38E-03 | HBEGF,TGFB1                                                      | 2  |
| Organismal Functions    | healing of bone                         | 4.38E-03 | CYR61,TNFRSF1A                                                   | 2  |
| Cellular Movement       | invasion of melanoma cells              | 4.38E-03 | MMP9,TGFB1                                                       | 2  |
| Cancer                  | invasion of melanoma cells              | 4.38E-03 | MMP9,TGFB1                                                       | 2  |
| Tumor Morphology        | invasion of melanoma cells              | 4.38E-03 | MMP9,TGFB1                                                       | 2  |
| Tissue Morphology       | lack of allantois                       | 4.38E-03 | DAB2,HNF4A                                                       | 2  |
| Tissue Morphology       | lack of amnion                          | 4.38E-03 | DAB2,HNF4A                                                       | 2  |
| Renal and Urological    |                                         |          |                                                                  |    |
| Disease                 | microalbuminuria                        | 4.38E-03 | THBD,VWF                                                         | 2  |
| Metabolic Disease       | microalbuminuria                        | 4.38E-03 | THBD,VWF                                                         | 2  |
| Renal and Urological    |                                         |          |                                                                  |    |
| Disease                 | minimal change nephrotic syndrome       | 4.38E-03 | CDKN1A,TGFB1                                                     | 2  |
| Cardiovascular System   |                                         |          |                                                                  |    |
| Development and         |                                         |          |                                                                  |    |
| Function                | neovascularization of choroid           | 4.38E-03 | MMP9,NOS3                                                        | 2  |
| Organismal              |                                         |          |                                                                  |    |
| Development             | neovascularization of choroid           | 4.38E-03 | MMP9,NOS3                                                        | 2  |
| Visual System           |                                         |          |                                                                  |    |
| Development and         |                                         |          |                                                                  |    |
| Function                | neovascularization of choroid           | 4.38E-03 | MMP9,NOS3                                                        | 2  |
| Cellular Function and   |                                         |          |                                                                  |    |
| Maintenance             | permeability of tumor cell lines        | 4.38E-03 | NOS3,THBD                                                        | 2  |
| Cell Morphology         | permeability of tumor cell lines        | 4.38E-03 | NOS3,THBD                                                        | 2  |
| Cellular Development    | proliferation of synovial fibroblasts   | 4.38E-03 | CDKN1A,TGFB1                                                     | 2  |
| Cellular Growth and     |                                         |          |                                                                  |    |
| Proliferation           | proliferation of synovial fibroblasts   | 4.38E-03 | CDKN1A,TGFB1                                                     | 2  |
| Connective Tissue       |                                         |          |                                                                  |    |
| Development and         |                                         |          |                                                                  |    |
| Function                | proliferation of synovial fibroblasts   | 4.38E-03 | CDKN1A,TGFB1                                                     | 2  |
| Molecular Transport     | quantity of nitrite                     | 4.38E-03 | NOS3,TNFRSF1A                                                    | 2  |
| Small Molecule          |                                         |          |                                                                  |    |
| Biochemistry            | quantity of nitrite                     | 4.38E-03 | NOS3,TNFRSF1A                                                    | 2  |
| Respiratory System      |                                         |          |                                                                  |    |
| Development and         |                                         |          |                                                                  |    |
| Function                | response of airway                      | 4.38E-03 | AQP5,GRK5                                                        | 2  |
| Cellular Movement       | cell movement of mononuclear leukocytes | 4.39E-03 | ANGPT2,HDC,ITGA5,KLF2,MMP9,PECAM1,PIP5K1C,RAP1GAP,TGFB1,TNFRSF1A | 10 |
| Hematological System    |                                         |          |                                                                  |    |
| Development and         |                                         |          |                                                                  |    |
| Function                | cell movement of mononuclear leukocytes | 4.39E-03 | ANGPT2,HDC,ITGA5,KLF2,MMP9,PECAM1,PIP5K1C,RAP1GAP,TGFB1,TNFRSF1A | 10 |
| Immune Cell             |                                         |          |                                                                  |    |
| Trafficking             | cell movement of mononuclear leukocytes | 4.39E-03 | ANGPT2,HDC,ITGA5,KLF2,MMP9,PECAM1,PIP5K1C,RAP1GAP,TGFB1,TNFRSF1A | 10 |
| Organismal              |                                         |          |                                                                  |    |
| Development             | abnormal morphology of trabecular bone  | 4.44E-03 | IRAK3,MMP9,NOS3,TNFRSF1A                                         | 4  |
| Tissue Development      | abnormal morphology of trabecular bone  | 4.44E-03 | IRAK3,MMP9,NOS3,TNFRSF1A                                         | 4  |
| Embryonic               |                                         |          |                                                                  |    |
| Development             | abnormal morphology of trabecular bone  | 4.44E-03 | IRAK3,MMP9,NOS3,TNFRSF1A                                         | 4  |

|                                                       |                                         |          |                                                                                                      |    |
|-------------------------------------------------------|-----------------------------------------|----------|------------------------------------------------------------------------------------------------------|----|
| Organ Development                                     | abnormal morphology of trabecular bone  | 4.44E-03 | IRAK3,MMP9,NOS3,TNFRSF1A                                                                             | 4  |
| Organ Morphology                                      | abnormal morphology of trabecular bone  | 4.44E-03 | IRAK3,MMP9,NOS3,TNFRSF1A                                                                             | 4  |
| Skeletal and Muscular System Development and Function | abnormal morphology of trabecular bone  | 4.44E-03 | IRAK3,MMP9,NOS3,TNFRSF1A                                                                             | 4  |
| Connective Tissue Development and Function            | abnormal morphology of trabecular bone  | 4.44E-03 | IRAK3,MMP9,NOS3,TNFRSF1A                                                                             | 4  |
| Tissue Morphology                                     | abnormal morphology of vitelline vessel | 4.44E-03 | ITGA5,SLC20A1,SMO,TGFB1                                                                              | 4  |
| Cell-To-Cell Signaling and Interaction                | immune response of tumor cell lines     | 4.62E-03 | CDKN1A,HBEGF,KLF2,TGFB1                                                                              | 4  |
| Inflammatory Response                                 | immune response of tumor cell lines     | 4.62E-03 | CDKN1A,HBEGF,KLF2,TGFB1                                                                              | 4  |
| Cancer                                                | central nervous system tumor            | 4.78E-03 | ADAM9,ELMO1,FRZB,HBEGF,MMP9,NES,SMO,TGFB1,TNFRSF1A                                                   | 9  |
| Neurological Disease                                  | central nervous system tumor            | 4.78E-03 | ADAM9,ELMO1,FRZB,HBEGF,MMP9,NES,SMO,TGFB1,TNFRSF1A                                                   | 9  |
| Neurological Disease                                  | Huntington's disease                    | 4.78E-03 | CP,ELMO1,EPHB4,HAP1 (includes EG:15114),LMCD1,MYO1B,PCDH7,RANBP1,RAP1GA P,RCAN1,TNFRSF1A,TUBA1A,UGCG | 13 |
| Hereditary Disorder                                   | Huntington's disease                    | 4.78E-03 | CP,ELMO1,EPHB4,HAP1 (includes EG:15114),LMCD1,MYO1B,PCDH7,RANBP1,RAP1GA P,RCAN1,TNFRSF1A,TUBA1A,UGCG | 13 |
| Skeletal and Muscular Disorders                       | Huntington's disease                    | 4.78E-03 | CP,ELMO1,EPHB4,HAP1 (includes EG:15114),LMCD1,MYO1B,PCDH7,RANBP1,RAP1GA P,RCAN1,TNFRSF1A,TUBA1A,UGCG | 13 |
| Cellular Development                                  | proliferation of hepatoma cell lines    | 4.92E-03 | BIN1,CDKN1A,HNF4A,SMO,TGFB1                                                                          | 5  |
| Cellular Growth and Proliferation                     | proliferation of hepatoma cell lines    | 4.92E-03 | BIN1,CDKN1A,HNF4A,SMO,TGFB1                                                                          | 5  |
| Molecular Transport                                   | release of Ca <sup>2+</sup>             | 4.95E-03 | ASPH,GRK5,HAP1 (includes EG:15114),PECAM1,RGS16,TGFB1                                                | 6  |
| Small Molecule Biochemistry                           | release of Ca <sup>2+</sup>             | 4.95E-03 | ASPH,GRK5,HAP1 (includes EG:15114),PECAM1,RGS16,TGFB1                                                | 6  |
| Cell Signaling                                        | release of Ca <sup>2+</sup>             | 4.95E-03 | ASPH,GRK5,HAP1 (includes EG:15114),PECAM1,RGS16,TGFB1                                                | 6  |
| Vitamin and Mineral Metabolism                        | release of Ca <sup>2+</sup>             | 4.95E-03 | ASPH,GRK5,HAP1 (includes EG:15114),PECAM1,RGS16,TGFB1                                                | 6  |
| Cardiovascular System Development and Function        | development of vasculature              | 5.01E-03 | CYR61,EGFL7,NOS3,TGFB1                                                                               | 4  |
| Tissue Development                                    | adhesion of monocytes                   | 5.05E-03 | ANGPT2,TGFB1,VWF                                                                                     | 3  |
| Cell-To-Cell Signaling and Interaction                | adhesion of monocytes                   | 5.05E-03 | ANGPT2,TGFB1,VWF                                                                                     | 3  |
| Hematological System Development and Function         | adhesion of monocytes                   | 5.05E-03 | ANGPT2,TGFB1,VWF                                                                                     | 3  |

|                                                      |                                            |          |                                                                                         |    |
|------------------------------------------------------|--------------------------------------------|----------|-----------------------------------------------------------------------------------------|----|
| Immune Cell Trafficking                              | adhesion of monocytes                      | 5.05E-03 | ANGPT2,TGFB1,VWF                                                                        | 3  |
| Inflammatory Response                                | adhesion of monocytes                      | 5.05E-03 | ANGPT2,TGFB1,VWF                                                                        | 3  |
| Cell Cycle Embryonic Development                     | arrest in G1 phase of tumor cell lines     | 5.06E-03 | CDKN1A,CREM (includes EG:12916),CYR61,ITGA5,TGFB1                                       | 5  |
| Cell Death and Survival                              | apoptosis of mesenchymal cells             | 5.08E-03 | SMO,TGFB1                                                                               | 2  |
| Cell Cycle                                           | arrest in interphase of epithelial cells   | 5.08E-03 | CDKN1A,TGFB1                                                                            | 2  |
| Cell Death and Survival                              | cell death of pneumocytes                  | 5.08E-03 | IRAK3,TGFB1                                                                             | 2  |
| Infectious Disease                                   | infection of endothelial cells             | 5.08E-03 | CD93,IFITM1                                                                             | 2  |
| Organismal Survival                                  | morbidity                                  | 5.08E-03 | MMP9,TNFRSF1A                                                                           | 2  |
| Cellular Development                                 | proliferation of gamma-delta T lymphocytes | 5.08E-03 | KLF2,TGFB1                                                                              | 2  |
| Cellular Growth and Proliferation                    | proliferation of gamma-delta T lymphocytes | 5.08E-03 | KLF2,TGFB1                                                                              | 2  |
| Hematological System Development and Function        | proliferation of gamma-delta T lymphocytes | 5.08E-03 | KLF2,TGFB1                                                                              | 2  |
| Protein Synthesis                                    | quantity of enzyme                         | 5.21E-03 | DYSF,NOS3,TGFB1,TNFRSF1A                                                                | 4  |
| Cancer                                               | colon cancer                               | 5.24E-03 | ADAMTS1,ANXA4,CDKN1A,EGFL7,FSCN1 (includes EG:14086),HNF4A,IFITM1,PVRL3,SMO,TGFB1,WISP1 | 11 |
| Gastrointestinal Disease                             | colon cancer                               | 5.24E-03 | ADAMTS1,ANXA4,CDKN1A,EGFL7,FSCN1 (includes EG:14086),HNF4A,IFITM1,PVRL3,SMO,TGFB1,WISP1 | 11 |
| Cancer                                               | brain tumor                                | 5.36E-03 | ADAM9,ELMO1,FRZB,MMP9,NES,SMO,TGFB1,TNFRSF1A                                            | 8  |
| Neurological Disease                                 | brain tumor                                | 5.36E-03 | ADAM9,ELMO1,FRZB,MMP9,NES,SMO,TGFB1,TNFRSF1A                                            | 8  |
| Renal and Urological System Development and Function | abnormal morphology of kidney              | 5.37E-03 | ADAMTS1,EHD3,LRRK2,NOS3,TNFRSF1A                                                        | 5  |
| Organ Morphology                                     | abnormal morphology of kidney              | 5.37E-03 | ADAMTS1,EHD3,LRRK2,NOS3,TNFRSF1A                                                        | 5  |
| Organ Morphology                                     | abnormal morphology of Peyer's patches     | 5.38E-03 | IRAK3,TGFB1,TNFRSF1A                                                                    | 3  |
| Lymphoid Tissue Structure and Development            | abnormal morphology of Peyer's patches     | 5.38E-03 | IRAK3,TGFB1,TNFRSF1A                                                                    | 3  |
| Tissue Morphology                                    | abnormal morphology of Peyer's patches     | 5.38E-03 | IRAK3,TGFB1,TNFRSF1A                                                                    | 3  |
| Digestive System Development and Function            | abnormal morphology of Peyer's patches     | 5.38E-03 | IRAK3,TGFB1,TNFRSF1A                                                                    | 3  |
| Gene Expression                                      | binding of synthetic promoter              | 5.38E-03 | CDKN1A,CREM (includes EG:12916),TGFB1                                                   | 3  |
| Cellular Development                                 | differentiation of megakaryocytes          | 5.38E-03 | MMP9,PECAM1,TGFB1                                                                       | 3  |

|                         |                                          |          |                                                                                    |    |
|-------------------------|------------------------------------------|----------|------------------------------------------------------------------------------------|----|
| Hematological System    |                                          |          |                                                                                    |    |
| Development and         |                                          |          |                                                                                    |    |
| Function                | differentiation of megakaryocytes        | 5.38E-03 | MMP9,PECAM1,TGFB1                                                                  | 3  |
| Hematopoiesis           | differentiation of megakaryocytes        | 5.38E-03 | MMP9,PECAM1,TGFB1                                                                  | 3  |
| Cardiovascular System   |                                          |          |                                                                                    |    |
| Development and         |                                          |          |                                                                                    |    |
| Function                | quantity of blood vessel                 | 5.38E-03 | ADAMTS1,NOS3,TGFB1                                                                 | 3  |
| Organismal              |                                          |          |                                                                                    |    |
| Development             | quantity of blood vessel                 | 5.38E-03 | ADAMTS1,NOS3,TGFB1                                                                 | 3  |
| Tissue Morphology       | quantity of blood vessel                 | 5.38E-03 | ADAMTS1,NOS3,TGFB1                                                                 | 3  |
| Tissue Development      | accumulation of granulocytes             | 5.42E-03 | HDC,ITGA5,MMP9,TNFRSF1A                                                            | 4  |
| Hematological System    |                                          |          |                                                                                    |    |
| Development and         |                                          |          |                                                                                    |    |
| Function                | accumulation of granulocytes             | 5.42E-03 | HDC,ITGA5,MMP9,TNFRSF1A                                                            | 4  |
| Immune Cell             |                                          |          |                                                                                    |    |
| Trafficking             | accumulation of granulocytes             | 5.42E-03 | HDC,ITGA5,MMP9,TNFRSF1A                                                            | 4  |
| Inflammatory            |                                          |          |                                                                                    |    |
| Response                | accumulation of granulocytes             | 5.42E-03 | HDC,ITGA5,MMP9,TNFRSF1A                                                            | 4  |
| Cell-To-Cell Signaling  |                                          |          |                                                                                    |    |
| and Interaction         |                                          |          |                                                                                    |    |
|                         | activation of blood platelets            | 5.42E-03 | NOS3,PECAM1,THBD,VWF                                                               | 4  |
| Hematological System    |                                          |          |                                                                                    |    |
| Development and         |                                          |          |                                                                                    |    |
| Function                | activation of blood platelets            | 5.42E-03 | NOS3,PECAM1,THBD,VWF                                                               | 4  |
| Inflammatory            |                                          |          |                                                                                    |    |
| Response                | activation of blood platelets            | 5.42E-03 | NOS3,PECAM1,THBD,VWF                                                               | 4  |
| Organismal Functions    | activation of blood platelets            | 5.42E-03 | NOS3,PECAM1,THBD,VWF                                                               | 4  |
| Cellular Movement       | cell movement of carcinoma cell lines    | 5.42E-03 | CYR61,RAP1GAP,TGFB1,WISP1                                                          | 4  |
| Developmental           |                                          |          |                                                                                    |    |
| Disorder                | cleft palate syndrome                    | 5.42E-03 | ASPH,CDKN1A,H19,TGFB1                                                              | 4  |
| Gastrointestinal        |                                          |          |                                                                                    |    |
| Disease                 | cleft palate syndrome                    | 5.42E-03 | ASPH,CDKN1A,H19,TGFB1                                                              | 4  |
| Organismal Injury and   |                                          |          |                                                                                    |    |
| Abnormalities           | cytosis                                  | 5.42E-03 | GRK5,LRRK2,MMP9,PDE4B,SPARCL1,TGFB1,TUBA1A                                         | 7  |
| Cell Morphology         | shape change of neurites                 | 5.44E-03 | CDKN1A,CHL1,ELMO1,GRASP,TGFB1,UGCG                                                 | 6  |
| Cancer                  | prostate cancer                          | 5.58E-03 | ADAM9,ANO6,ASPH,CDKN1A,EGFL7,FLNC,MMP9,NE                                          | 11 |
| Reproductive System     |                                          |          | S,NOS3,TUBA1A,TUBB6                                                                |    |
| Disease                 | prostate cancer                          | 5.58E-03 | ADAM9,ANO6,ASPH,CDKN1A,EGFL7,FLNC,MMP9,NE                                          | 11 |
|                         |                                          |          | S,NOS3,TUBA1A,TUBB6                                                                |    |
| Protein Synthesis       | quantity of protein in blood             | 5.58E-03 | ANGPTL4,DOK1,DYSF,HAP1 (includes EG:15114),HDC,MMP9,NOS3,RCAN1,TGFB1,THBD,TNFRSF1A | 11 |
| Cell Death and Survival | anoikis                                  | 5.64E-03 | DAB2,ITGA5,TGFB1,ZEB1                                                              | 4  |
| Cellular Development    | proliferation of brain cancer cell lines | 5.68E-03 | CDKN1A,CYR61,HNF4A,MMP9,TGFB1                                                      | 5  |
| Cellular Growth and     |                                          |          |                                                                                    |    |
| Proliferation           | proliferation of brain cancer cell lines | 5.68E-03 | CDKN1A,CYR61,HNF4A,MMP9,TGFB1                                                      | 5  |

|                                                             |                                              |          |                                    |   |
|-------------------------------------------------------------|----------------------------------------------|----------|------------------------------------|---|
| Hematological System<br>Development and<br>Function         | quantity of neutrophils                      | 5.70E-03 | DOK1,HDC,IRAK3,MMP9,PDE4B,TNFRSF1A | 6 |
| Inflammatory<br>Response                                    | quantity of neutrophils                      | 5.70E-03 | DOK1,HDC,IRAK3,MMP9,PDE4B,TNFRSF1A | 6 |
| Tissue Morphology                                           | quantity of neutrophils                      | 5.70E-03 | DOK1,HDC,IRAK3,MMP9,PDE4B,TNFRSF1A | 6 |
| Cell Morphology                                             | morphology of Purkinje cells                 | 5.71E-03 | CP,FAIM2,SPARCL1                   | 3 |
| Organ Morphology                                            | morphology of Purkinje cells                 | 5.71E-03 | CP,FAIM2,SPARCL1                   | 3 |
| Nervous System<br>Development and<br>Function               | morphology of Purkinje cells                 | 5.71E-03 | CP,FAIM2,SPARCL1                   | 3 |
| Renal and Urological<br>System Development<br>and Function  | proliferation of glomerular cells            | 5.71E-03 | ANGPT2,CDKN1A,TGFB1                | 3 |
| Cellular Development                                        | proliferation of glomerular cells            | 5.71E-03 | ANGPT2,CDKN1A,TGFB1                | 3 |
| Cellular Growth and<br>Proliferation                        | proliferation of glomerular cells            | 5.71E-03 | ANGPT2,CDKN1A,TGFB1                | 3 |
| Cellular Development                                        | differentiation of osteoblasts               | 5.83E-03 | CYR61,FRZB,ITGA5,NOS3,SMO,TGFB1    | 6 |
| Skeletal and Muscular<br>System Development<br>and Function | differentiation of osteoblasts               | 5.83E-03 | CYR61,FRZB,ITGA5,NOS3,SMO,TGFB1    | 6 |
| Cell Death and Survival                                     | apoptosis of hepatic stellate cells          | 5.83E-03 | MMP9,TGFB1                         | 2 |
| Cell Death and Survival                                     | apoptosis of macrophage cancer cell<br>lines | 5.83E-03 | TGFB1,TNFRSF1A                     | 2 |
| Endocrine System<br>Disorders                               | autoimmune thyroiditis                       | 5.83E-03 | TGFB1,TNFRSF1A                     | 2 |
| Immunological<br>Disease                                    | autoimmune thyroiditis                       | 5.83E-03 | TGFB1,TNFRSF1A                     | 2 |
| Amino Acid<br>Metabolism                                    | catabolism of basic amino acid               | 5.83E-03 | HDC,NOS3                           | 2 |
| Small Molecule<br>Biochemistry                              | catabolism of basic amino acid               | 5.83E-03 | HDC,NOS3                           | 2 |
| Cellular Movement                                           | chemotaxis of microglia                      | 5.83E-03 | LRRK2,TGFB1                        | 2 |
| Hematological System<br>Development and<br>Function         | chemotaxis of microglia                      | 5.83E-03 | LRRK2,TGFB1                        | 2 |
| Immune Cell<br>Trafficking                                  | chemotaxis of microglia                      | 5.83E-03 | LRRK2,TGFB1                        | 2 |
| Inflammatory<br>Response                                    | chemotaxis of microglia                      | 5.83E-03 | LRRK2,TGFB1                        | 2 |
| Nervous System<br>Development and<br>Function               | chemotaxis of microglia                      | 5.83E-03 | LRRK2,TGFB1                        | 2 |
| Organismal<br>Development                                   | development of cerebellar cortex             | 5.83E-03 | FAIM2,SMO                          | 2 |
| Tissue Development                                          | development of cerebellar cortex             | 5.83E-03 | FAIM2,SMO                          | 2 |
| Embryonic<br>Development                                    | development of cerebellar cortex             | 5.83E-03 | FAIM2,SMO                          | 2 |
| Organ Development                                           | development of cerebellar cortex             | 5.83E-03 | FAIM2,SMO                          | 2 |

|                                        |                                       |          |                                                 |  |   |
|----------------------------------------|---------------------------------------|----------|-------------------------------------------------|--|---|
| Nervous System                         |                                       |          |                                                 |  |   |
| Development and Function               |                                       |          |                                                 |  |   |
|                                        | development of cerebellar cortex      | 5.83E-03 | FAIM2,SMO                                       |  | 2 |
| Cardiovascular Disease                 |                                       |          |                                                 |  |   |
| Organismal Injury and Abnormalities    |                                       |          |                                                 |  |   |
|                                        | fibrosis of blood vessel              | 5.83E-03 | NOS3,TNFRSF1A                                   |  | 2 |
|                                        | fibrosis of blood vessel              | 5.83E-03 | NOS3,TNFRSF1A                                   |  | 2 |
| Cell Death and Survival                |                                       |          |                                                 |  |   |
| Small Molecule                         |                                       |          |                                                 |  |   |
| Biochemistry                           | homeostasis of acylglycerol           | 5.83E-03 | ANGPTL4,HNF4A                                   |  | 2 |
| Lipid Metabolism                       | homeostasis of acylglycerol           | 5.83E-03 | ANGPTL4,HNF4A                                   |  | 2 |
| Cellular Assembly and Organization     |                                       |          |                                                 |  |   |
|                                        | organization of cellular protrusions  | 5.83E-03 | CHL1,FSCN1 (includes EG:14086)                  |  | 2 |
| Cellular Function and Maintenance      |                                       |          |                                                 |  |   |
|                                        | organization of cellular protrusions  | 5.83E-03 | CHL1,FSCN1 (includes EG:14086)                  |  | 2 |
| Cellular Movement                      |                                       |          |                                                 |  |   |
|                                        | recruitment of muscle cells           | 5.83E-03 | NOS3,TGFB1                                      |  | 2 |
| Cell-To-Cell Signaling and Interaction |                                       |          |                                                 |  |   |
|                                        | recruitment of muscle cells           | 5.83E-03 | NOS3,TGFB1                                      |  | 2 |
| Cellular Function and Maintenance      |                                       |          |                                                 |  |   |
|                                        | regulation of connective tissue cells | 5.83E-03 | CYR61,TGFB1                                     |  | 2 |
| Cardiovascular System                  |                                       |          |                                                 |  |   |
| Development and Function               |                                       |          |                                                 |  |   |
|                                        | tubulogenesis of endothelial cells    | 5.83E-03 | CYR61,MMP9                                      |  | 2 |
| Organismal Development                 |                                       |          |                                                 |  |   |
|                                        | tubulogenesis of endothelial cells    | 5.83E-03 | CYR61,MMP9                                      |  | 2 |
| Tissue Development                     |                                       |          |                                                 |  |   |
| Embryonic                              |                                       |          |                                                 |  |   |
|                                        | tubulogenesis of endothelial cells    | 5.83E-03 | CYR61,MMP9                                      |  | 2 |
|                                        | tubulogenesis of endothelial cells    | 5.83E-03 | CYR61,MMP9                                      |  | 2 |
| Cellular Development                   |                                       |          |                                                 |  |   |
|                                        | tubulogenesis of endothelial cells    | 5.83E-03 | CYR61,MMP9                                      |  | 2 |
| Tissue Development                     |                                       |          |                                                 |  |   |
|                                        | adhesion of granulocytes              | 5.85E-03 | ANGPT2,ITGA5,PECAM1,THBD                        |  | 4 |
| Cell-To-Cell Signaling and Interaction |                                       |          |                                                 |  |   |
|                                        | adhesion of granulocytes              | 5.85E-03 | ANGPT2,ITGA5,PECAM1,THBD                        |  | 4 |
| Hematological System                   |                                       |          |                                                 |  |   |
| Development and Function               |                                       |          |                                                 |  |   |
|                                        | adhesion of granulocytes              | 5.85E-03 | ANGPT2,ITGA5,PECAM1,THBD                        |  | 4 |
| Immune Cell                            |                                       |          |                                                 |  |   |
| Trafficking                            |                                       |          |                                                 |  |   |
|                                        | adhesion of granulocytes              | 5.85E-03 | ANGPT2,ITGA5,PECAM1,THBD                        |  | 4 |
|                                        |                                       |          | CDKN1A,KLF2,PECAM1,RCAN1,ST3GAL1,TGFB1,TNFRSF1A |  | 7 |
| Cell Death and Survival                |                                       |          |                                                 |  |   |
|                                        | apoptosis of T lymphocytes            | 5.97E-03 |                                                 |  | 7 |
| Tissue Development                     |                                       |          |                                                 |  |   |
|                                        | accumulation of myeloid cells         | 6.01E-03 | ANGPT2,HDC,ITGA5,MMP9,TNFRSF1A                  |  | 5 |
| Hematological System                   |                                       |          |                                                 |  |   |
| Development and Function               |                                       |          |                                                 |  |   |
|                                        | accumulation of myeloid cells         | 6.01E-03 | ANGPT2,HDC,ITGA5,MMP9,TNFRSF1A                  |  | 5 |
| Immune Cell                            |                                       |          |                                                 |  |   |
| Trafficking                            |                                       |          |                                                 |  |   |
|                                        | accumulation of myeloid cells         | 6.01E-03 | ANGPT2,HDC,ITGA5,MMP9,TNFRSF1A                  |  | 5 |
| Inflammatory Response                  |                                       |          |                                                 |  |   |
|                                        | accumulation of myeloid cells         | 6.01E-03 | ANGPT2,HDC,ITGA5,MMP9,TNFRSF1A                  |  | 5 |

|                                                       |                                                     |          |                                                   |   |
|-------------------------------------------------------|-----------------------------------------------------|----------|---------------------------------------------------|---|
| Organismal Injury and Abnormalities                   | edema                                               | 6.03E-03 | ANGPT2,CD93,H19,IRAK3,KLF2,NOS3,PECAM1,TGFB1      | 8 |
| Cell Death and Survival                               | cell viability of lymphoma cell lines               | 6.06E-03 | CDKN1A,HBEGF,TGFB1                                | 3 |
| Renal and Urological Disease                          | nephrosis                                           | 6.06E-03 | CDKN1A,PDE4B,TGFB1                                | 3 |
| Molecular Transport                                   | concentration of fatty acid                         | 6.09E-03 | ANGPTL4,HSD3B7,MMP9,NOS3,SLCO2A1,TGFB1,TNFRSF1A   | 7 |
| Small Molecule Biochemistry                           | concentration of fatty acid                         | 6.09E-03 | ANGPTL4,HSD3B7,MMP9,NOS3,SLCO2A1,TGFB1,TNFRSF1A   | 7 |
| Lipid Metabolism                                      | concentration of fatty acid                         | 6.09E-03 | ANGPTL4,HSD3B7,MMP9,NOS3,SLCO2A1,TGFB1,TNFRSF1A   | 7 |
| Gastrointestinal Disease                              | Inflammatory Bowel Disease                          | 6.23E-03 | GRK5,MMP9,NOS3,PDE4B,SNX20,TGFB1,THBD,TNFRSF1A    | 8 |
| Inflammatory Disease                                  | Inflammatory Bowel Disease                          | 6.23E-03 | GRK5,MMP9,NOS3,PDE4B,SNX20,TGFB1,THBD,TNFRSF1A    | 8 |
| Cellular Movement                                     | chemotaxis of connective tissue cells               | 6.42E-03 | ANGPT2,NOS3,TGFB1                                 | 3 |
| Organismal Injury and Abnormalities                   | development of lesion                               | 6.42E-03 | CDKN1A,MMP9,TNFRSF1A                              | 3 |
| Cancer                                                | fibrosarcoma                                        | 6.42E-03 | CDKN1A,CHL1,TNFRSF1A                              | 3 |
| Hematological System Development and Function         | quantity of myeloid cells                           | 6.44E-03 | CDKN1A,DOK1,HDC,IRAK3,MMP9,PDE4B,SLC20A1,TNFRSF1A | 8 |
| Tissue Morphology                                     | quantity of myeloid cells                           | 6.44E-03 | CDKN1A,DOK1,HDC,IRAK3,MMP9,PDE4B,SLC20A1,TNFRSF1A | 8 |
| Cellular Development                                  | differentiation of epithelial cells                 | 6.44E-03 | CDKN1A,HNF4A,MMP9,SMO,TGFB1,TNFRSF1A,ZEB1         | 7 |
| Renal and Urological Disease                          | glomerulonephritis                                  | 6.52E-03 | CDKN1A,HBEGF,MMP9,PDE4B,TGFB1,TNFRSF1A            | 6 |
| Inflammatory Response                                 | glomerulonephritis                                  | 6.52E-03 | CDKN1A,HBEGF,MMP9,PDE4B,TGFB1,TNFRSF1A            | 6 |
| Inflammatory Disease                                  | glomerulonephritis                                  | 6.52E-03 | CDKN1A,HBEGF,MMP9,PDE4B,TGFB1,TNFRSF1A            | 6 |
| Cardiovascular Disease                                | abdominal aortic aneurysm                           | 6.63E-03 | ANGPT2,MMP9                                       | 2 |
| Cell Death and Survival                               | apoptosis of rhabdomyosarcoma cell lines            | 6.63E-03 | CDKN1A,TNFRSF1A                                   | 2 |
| Cell Morphology                                       | area of muscle cells                                | 6.63E-03 | ANGPT2,TGFB1                                      | 2 |
| Skeletal and Muscular System Development and Function | area of muscle cells                                | 6.63E-03 | ANGPT2,TGFB1                                      | 2 |
| Cell Cycle                                            | arrest in cell cycle progression of lung cell lines | 6.63E-03 | CDKN1A,TGFB1                                      | 2 |
| Respiratory System Development and Function           | arrest in cell cycle progression of lung cell lines | 6.63E-03 | CDKN1A,TGFB1                                      | 2 |
| Cellular Development                                  | arrest in growth of lymphoma cell lines             | 6.63E-03 | CDKN1A,TGFB1                                      | 2 |
| Cellular Growth and Proliferation                     | arrest in growth of lymphoma cell lines             | 6.63E-03 | CDKN1A,TGFB1                                      | 2 |
| Organismal Development                                | development of islets of Langerhans                 | 6.63E-03 | MMP9,TGFB1                                        | 2 |
| Tissue Development                                    | development of islets of Langerhans                 | 6.63E-03 | MMP9,TGFB1                                        | 2 |

|                                                       |                                           |          |                                                            |   |
|-------------------------------------------------------|-------------------------------------------|----------|------------------------------------------------------------|---|
| Embryonic Development                                 | development of islets of Langerhans       | 6.63E-03 | MMP9,TGFB1                                                 | 2 |
| Organ Development                                     | development of islets of Langerhans       | 6.63E-03 | MMP9,TGFB1                                                 | 2 |
| Endocrine System Development and Function             | development of islets of Langerhans       | 6.63E-03 | MMP9,TGFB1                                                 | 2 |
| Digestive System Development and Function             | development of islets of Langerhans       | 6.63E-03 | MMP9,TGFB1                                                 | 2 |
| Cardiovascular Disease                                | development of vascular lesion            | 6.63E-03 | MMP9,TNFRSF1A                                              | 2 |
| Organismal Injury and Abnormalities                   | development of vascular lesion            | 6.63E-03 | MMP9,TNFRSF1A                                              | 2 |
| Organismal Development                                | formation of neural fold                  | 6.63E-03 | HAP1 (includes EG:15114),SMO                               | 2 |
| Tissue Development                                    | formation of neural fold                  | 6.63E-03 | HAP1 (includes EG:15114),SMO                               | 2 |
| Embryonic Development                                 | formation of neural fold                  | 6.63E-03 | HAP1 (includes EG:15114),SMO                               | 2 |
| Inflammatory Response                                 | inflammation of body region               | 6.63E-03 | KLF2,NOS3                                                  | 2 |
| Cellular Movement                                     | migration of gonadal cells                | 6.63E-03 | ELMO1,TGFB1                                                | 2 |
| Reproductive System Development and Function          | migration of gonadal cells                | 6.63E-03 | ELMO1,TGFB1                                                | 2 |
| Cellular Development                                  | proliferation of intestinal cell lines    | 6.63E-03 | ITGA5,TGFB1                                                | 2 |
| Cellular Growth and Proliferation                     | proliferation of intestinal cell lines    | 6.63E-03 | ITGA5,TGFB1                                                | 2 |
| Digestive System Development and Function             | proliferation of intestinal cell lines    | 6.63E-03 | ITGA5,TGFB1                                                | 2 |
| Skeletal and Muscular System Development and Function | quantity of myofiber                      | 6.63E-03 | FLNC,RCAN1                                                 | 2 |
| Tissue Morphology                                     | quantity of myofiber                      | 6.63E-03 | FLNC,RCAN1                                                 | 2 |
| Cardiovascular System Development and Function        | vasoconstriction of artery                | 6.63E-03 | ANGPT2,TGFB1                                               | 2 |
| Free Radical Scavenging                               | synthesis of reactive oxygen species      | 6.75E-03 | ANGPT2,CDKN1A,CYR61,ITGA5,NOS3,PDE2A,PECAM1,TGFB1,TNFRSF1A | 9 |
| Cardiovascular System Development and Function        | abnormal morphology of ventricular septum | 6.79E-03 | BIN1,MMP9,NOS3                                             | 3 |
| Organ Morphology                                      | abnormal morphology of ventricular septum | 6.79E-03 | BIN1,MMP9,NOS3                                             | 3 |
| Cardiovascular System Development and Function        | morphology of right ventricle             | 6.79E-03 | ADAM9,HBEGF,SLCO2A1                                        | 3 |
| Organ Morphology                                      | morphology of right ventricle             | 6.79E-03 | ADAM9,HBEGF,SLCO2A1                                        | 3 |



|                                                              |                                         |          |                                                         |   |
|--------------------------------------------------------------|-----------------------------------------|----------|---------------------------------------------------------|---|
| Lymphoid Tissue Structure and Development                    | quantity of lymphatic system cells      | 6.94E-03 | CDKN1A,DOK1,PECAM1,RFTN1,SLC20A1,TNFRSF1A,ZEB1          | 7 |
| Tissue Morphology Cellular Movement                          | quantity of lymphatic system cells      | 6.94E-03 | CDKN1A,DOK1,PECAM1,RFTN1,SLC20A1,TNFRSF1A,ZEB1          | 7 |
| Connective Tissue Development and Function                   | migration of fibroblast cell lines      | 7.03E-03 | CDKN1A,HBEGF,ITGA5,KLF2                                 | 4 |
| Cardiovascular System Development and Function               | cell viability of endothelial cells     | 7.17E-03 | ANGPT2,CYR61,DAB2                                       | 3 |
| Cell Death and Survival                                      | cell viability of endothelial cells     | 7.17E-03 | ANGPT2,CYR61,DAB2                                       | 3 |
| Cardiovascular System Development and Function               | contractility of ventricular myocardium | 7.17E-03 | HBEGF,MMP9,NOS3                                         | 3 |
| Organ Morphology                                             | contractility of ventricular myocardium | 7.17E-03 | HBEGF,MMP9,NOS3                                         | 3 |
| Skeletal and Muscular System Development and Function        | contractility of ventricular myocardium | 7.17E-03 | HBEGF,MMP9,NOS3                                         | 3 |
| Tissue Morphology Connective Tissue Development and Function | quantity of brown adipose tissue        | 7.17E-03 | CDKN1A,DOK1,HDC                                         | 3 |
| Function                                                     | quantity of brown adipose tissue        | 7.17E-03 | CDKN1A,DOK1,HDC                                         | 3 |
| Cancer Organismal Development                                | neuroendocrine tumor                    | 7.25E-03 | ADAM9,ADAMTS1,CDKN1A,CYR61,FRZB,HBEGF,IFITM1,MMP9,TGFB1 | 9 |
| Development                                                  | abnormal morphology of lung             | 7.29E-03 | KLF2,NOS3,PECAM1,TGFB1                                  | 4 |
| Tissue Development Embryonic                                 | abnormal morphology of lung             | 7.29E-03 | KLF2,NOS3,PECAM1,TGFB1                                  | 4 |
| Development                                                  | abnormal morphology of lung             | 7.29E-03 | KLF2,NOS3,PECAM1,TGFB1                                  | 4 |
| Organ Development                                            | abnormal morphology of lung             | 7.29E-03 | KLF2,NOS3,PECAM1,TGFB1                                  | 4 |
| Organ Morphology                                             | abnormal morphology of lung             | 7.29E-03 | KLF2,NOS3,PECAM1,TGFB1                                  | 4 |
| Respiratory System Development and Function                  | abnormal morphology of lung             | 7.29E-03 | KLF2,NOS3,PECAM1,TGFB1                                  | 4 |
| Function                                                     | abnormal morphology of lung             | 7.29E-03 | KLF2,NOS3,PECAM1,TGFB1                                  | 4 |
| Tissue Morphology                                            | extraembryonic tissue                   | 7.42E-03 | DAB2,HNF4A,ITGA5,KLF2,TGFB1,UGCG                        | 6 |
| Cancer                                                       | lung adenocarcinoma                     | 7.47E-03 | DOK1,HNF4A,MMP9,THBD,VWF                                | 5 |
| Respiratory Disease                                          | lung adenocarcinoma                     | 7.47E-03 | DOK1,HNF4A,MMP9,THBD,VWF                                | 5 |
| Cellular Movement                                            | recruitment of neutrophils              | 7.47E-03 | MMP9,PDE4B,PIP5K1C,TNFRSF1A,VWF                         | 5 |
| Cell-To-Cell Signaling and Interaction                       | recruitment of neutrophils              | 7.47E-03 | MMP9,PDE4B,PIP5K1C,TNFRSF1A,VWF                         | 5 |
| Hematological System Development and Function                | recruitment of neutrophils              | 7.47E-03 | MMP9,PDE4B,PIP5K1C,TNFRSF1A,VWF                         | 5 |
| Immune Cell Trafficking                                      | recruitment of neutrophils              | 7.47E-03 | MMP9,PDE4B,PIP5K1C,TNFRSF1A,VWF                         | 5 |

|                                                      |                                                                      |          |                                 |   |
|------------------------------------------------------|----------------------------------------------------------------------|----------|---------------------------------|---|
| Inflammatory Response                                | recruitment of neutrophils<br>abnormal morphology of lens epithelium | 7.47E-03 | MMP9,PDE4B,PIP5K1C,TNFRSF1A,VWF | 5 |
| Tissue Morphology                                    | epithelium                                                           | 7.48E-03 | CDKN1A,H19                      | 2 |
| Renal and Urological System Development and Function | cell spreading of kidney cell lines                                  | 7.48E-03 | DAB2,FLNC                       | 2 |
| Cell Morphology                                      | cell spreading of kidney cell lines                                  | 7.48E-03 | DAB2,FLNC                       | 2 |
| Tissue Development                                   | disruption of intercellular junctions                                | 7.48E-03 | CYR61,THBD                      | 2 |
| Cell-To-Cell Signaling and Interaction               | disruption of intercellular junctions                                | 7.48E-03 | CYR61,THBD                      | 2 |
| Cellular Assembly and Organization                   | disruption of intercellular junctions                                | 7.48E-03 | CYR61,THBD                      | 2 |
| Cellular Compromise                                  | disruption of intercellular junctions                                | 7.48E-03 | CYR61,THBD                      | 2 |
| Cellular Compromise                                  | injury of neurons                                                    | 7.48E-03 | ANGPT2,TGFB1                    | 2 |
| Cardiovascular Disease                               | pericarditis                                                         | 7.48E-03 | TGFB1,TUBA1A                    | 2 |
| Inflammatory Disease                                 | pericarditis                                                         | 7.48E-03 | TGFB1,TUBA1A                    | 2 |
| Cellular Movement                                    | transmigration of tumor cell lines                                   | 7.48E-03 | PECAM1,RAP1GAP                  | 2 |
| Cell Death and Survival                              | cell death of motor neurons                                          | 7.57E-03 | TGFB1,TNFRSF1A,TSHZ3            | 3 |
| Developmental Disorder                               | Adams-Oliver syndrome type 2                                         | 7.73E-03 | DOCK6                           | 1 |
| Organismal Injury and Abnormalities                  | Adams-Oliver syndrome type 2                                         | 7.73E-03 | DOCK6                           | 1 |
| Dermatological Diseases and Conditions               | Adams-Oliver syndrome type 2                                         | 7.73E-03 | DOCK6                           | 1 |
| Hereditary Disorder                                  | Camurati-Engelmann disease                                           | 7.73E-03 | TGFB1                           | 1 |
| Skeletal and Muscular Disorders                      | Camurati-Engelmann disease<br>Lethal congenital contractural syndrom | 7.73E-03 | TGFB1                           | 1 |
| Neurological Disease                                 | israeli bedouin type b<br>Lethal congenital contractural syndrom     | 7.73E-03 | PIP5K1C                         | 1 |
| Hereditary Disorder                                  | israeli bedouin type b                                               | 7.73E-03 | PIP5K1C                         | 1 |
| Neurological Disease                                 | Parkinson disease 8                                                  | 7.73E-03 | LRRK2                           | 1 |
| Hereditary Disorder                                  | Parkinson disease 8                                                  | 7.73E-03 | LRRK2                           | 1 |
| Skeletal and Muscular Disorders                      | Parkinson disease 8                                                  | 7.73E-03 | LRRK2                           | 1 |
| Developmental Disorder                               | Russell-Silver syndrome                                              | 7.73E-03 | H19                             | 1 |
| Hereditary Disorder                                  | Russell-Silver syndrome                                              | 7.73E-03 | H19                             | 1 |
| Hereditary Disorder                                  | Scott syndrome                                                       | 7.73E-03 | ANO6                            | 1 |
| Hematological Disease                                | Scott syndrome                                                       | 7.73E-03 | ANO6                            | 1 |
| Cell Morphology                                      | abnormal morphology of type IV fibrocyte                             | 7.73E-03 | OTOS                            | 1 |
| Tissue Morphology                                    | abnormal morphology of type IV fibrocyte                             | 7.73E-03 | OTOS                            | 1 |

|                                                |                                                                            |          |        |   |
|------------------------------------------------|----------------------------------------------------------------------------|----------|--------|---|
| Connective Tissue Development and Function     | abnormal morphology of type IV fibrocyte                                   | 7.73E-03 | OTOS   | 1 |
| Tissue Development                             | accumulation of T lymphoblasts                                             | 7.73E-03 | TGFB1  | 1 |
| Hematological System Development and Function  | accumulation of T lymphoblasts                                             | 7.73E-03 | TGFB1  | 1 |
| Immune Cell Trafficking                        | accumulation of T lymphoblasts                                             | 7.73E-03 | TGFB1  | 1 |
| Inflammatory Response                          | accumulation of T lymphoblasts                                             | 7.73E-03 | TGFB1  | 1 |
| Hematopoiesis                                  | accumulation of T lymphoblasts                                             | 7.73E-03 | TGFB1  | 1 |
| Molecular Transport                            | accumulation of iodide                                                     | 7.73E-03 | SLC5A5 | 1 |
| Metabolic Disease                              | aceruloplasminemia                                                         | 7.73E-03 | CP     | 1 |
| Cell-To-Cell Signaling and Interaction         | activation of Th3 cells                                                    | 7.73E-03 | TGFB1  | 1 |
| Hematological System Development and Function  | activation of Th3 cells                                                    | 7.73E-03 | TGFB1  | 1 |
| Immune Cell Trafficking                        | activation of Th3 cells                                                    | 7.73E-03 | TGFB1  | 1 |
| Inflammatory Response                          | activation of Th3 cells                                                    | 7.73E-03 | TGFB1  | 1 |
| Small Molecule Biochemistry                    | activation of doxorubicin                                                  | 7.73E-03 | NOS3   | 1 |
| Carbohydrate Metabolism                        | activation of doxorubicin                                                  | 7.73E-03 | NOS3   | 1 |
| Drug Metabolism                                | activation of doxorubicin                                                  | 7.73E-03 | NOS3   | 1 |
| Cell-To-Cell Signaling and Interaction         | activation of liver cell lines                                             | 7.73E-03 | TGFB1  | 1 |
| Cell-To-Cell Signaling and Interaction         | activation of mucosa cells                                                 | 7.73E-03 | CDKN1A | 1 |
| Tissue Development                             | adhesion of cord blood cells                                               | 7.73E-03 | ITGA5  | 1 |
| Cell-To-Cell Signaling and Interaction         | adhesion of cord blood cells                                               | 7.73E-03 | ITGA5  | 1 |
| Tissue Development                             | aggregation of endothelial cells                                           | 7.73E-03 | EGFL7  | 1 |
| Cardiovascular System Development and Function | angiogenesis of papilloma                                                  | 7.73E-03 | TGFB1  | 1 |
| Cancer                                         | angiogenesis of papilloma                                                  | 7.73E-03 | TGFB1  | 1 |
| Cell-To-Cell Signaling and Interaction         | antibody-dependent cell-mediated cytotoxicity of ovarian cancer cell lines | 7.73E-03 | HBEGF  | 1 |
| Inflammatory Response                          | antibody-dependent cell-mediated cytotoxicity of ovarian cancer cell lines | 7.73E-03 | HBEGF  | 1 |

| Category                                                    | Term                                          | Count    | P-Value                                                                                                                                                          | Genes |
|-------------------------------------------------------------|-----------------------------------------------|----------|------------------------------------------------------------------------------------------------------------------------------------------------------------------|-------|
| Organ Morphology Embryonic Development                      | morphology of skin                            | 4.21E-05 | DNASE1L2,EVPL,F2RL1,HR,IRF2,ITGB6,KRT4,LIPH,LMO4                                                                                                                 | 9     |
| Organismal Development                                      | development of presphenoid bone               | 1.15E-04 | LMO4,PHC1                                                                                                                                                        | 2     |
| Organismal Development                                      | development of presphenoid bone               | 1.15E-04 | LMO4,PHC1                                                                                                                                                        | 2     |
| Tissue Development Gastrointestinal Disease                 | development of presphenoid bone               | 1.15E-04 | LMO4,PHC1                                                                                                                                                        | 2     |
| Organismal Injury and Abnormalities                         | oral submucous fibrosis                       | 1.46E-04 | BARX2,ELF3,KRT19 (includes EG:16669),UBD                                                                                                                         | 4     |
| Organ Morphology                                            | oral submucous fibrosis                       | 1.46E-04 | BARX2,ELF3,KRT19 (includes EG:16669),UBD                                                                                                                         | 4     |
| Organ Morphology                                            | morphology of epidermis                       | 2.06E-04 | EVPL,F2RL1,HR,IRF2,ITGB6,LMO4                                                                                                                                    | 6     |
| Cell Death and Survival Tumor Morphology                    | apoptosis of mesothelioma cells               | 2.29E-04 | BID,TNFSF10                                                                                                                                                      | 2     |
| Cell Death and Survival Tumor Morphology                    | apoptosis of mesothelioma cells               | 2.29E-04 | BID,TNFSF10                                                                                                                                                      | 2     |
| Cell Death and Survival Tumor Morphology                    | apoptosis of non-small-cell lung cancer cells | 2.29E-04 | BID,TNFSF10                                                                                                                                                      | 2     |
| Cell Death and Survival Tumor Morphology                    | apoptosis of non-small-cell lung cancer cells | 2.29E-04 | BID,TNFSF10                                                                                                                                                      | 2     |
| Energy Production                                           | beta-oxidation of very long chain fatty acid  | 3.81E-04 | ABCD3,SLC27A2                                                                                                                                                    | 2     |
| Lipid Metabolism Small Molecule Biochemistry                | beta-oxidation of very long chain fatty acid  | 3.81E-04 | ABCD3,SLC27A2                                                                                                                                                    | 2     |
| Cellular Function and Maintenance                           | cellular homeostasis                          | 4.59E-04 | ABCD3,SLC27A2,ABCD3,BID,ELF3,F2RL1,FAM3B,FZD5,IFNGR2,IRF2,KC NK5,MUC1,PRKAA2,RGS2 (includes EG:19735),SLC26A4,SLC39A4,SLC9A2,ST3GAL5,TFRC, TNFSF10,TREH,UBD,WNT4 | 21    |
| Energy Production                                           | beta-oxidation of lignoceric acid             | 5.69E-04 | ABCD3,SLC27A2                                                                                                                                                    | 2     |
| Lipid Metabolism Small Molecule Biochemistry                | beta-oxidation of lignoceric acid             | 5.69E-04 | ABCD3,SLC27A2                                                                                                                                                    | 2     |
| Tissue Morphology Endocrine System Development and Function | lack of presphenoid bone                      | 5.69E-04 | LMO4,PHC1                                                                                                                                                        | 2     |
| Cellular Movement                                           | glucose tolerance                             | 6.51E-04 | CCRN4L,F2RL1,FAM3B,PRKAA2,PRKAR2B,RASGRF1,ST3GAL5                                                                                                                | 7     |
| Cellular Movement                                           | migration of myoblasts                        | 7.93E-04 | BARX2,SIX1                                                                                                                                                       | 2     |
| Skeletal and Muscular System Development and Function       | migration of myoblasts                        | 7.93E-04 | BARX2,SIX1                                                                                                                                                       | 2     |
| Cell-To-Cell Signaling and Interaction                      | activation of leukemia cell lines             | 1.02E-03 | CADM1,PHC1,TNFSF10                                                                                                                                               | 3     |
| Organ Morphology Embryonic Development                      | abnormal morphology of sphenoid bone          | 1.05E-03 | LMO4,PHC1                                                                                                                                                        | 2     |
| Organismal Development                                      | abnormal morphology of sphenoid bone          | 1.05E-03 | LMO4,PHC1                                                                                                                                                        | 2     |
| Organismal Development                                      | abnormal morphology of sphenoid bone          | 1.05E-03 | LMO4,PHC1                                                                                                                                                        | 2     |
| Tissue Development                                          | abnormal morphology of sphenoid bone          | 1.05E-03 | LMO4,PHC1                                                                                                                                                        | 2     |

|                                                       |                                                |          |                     |   |
|-------------------------------------------------------|------------------------------------------------|----------|---------------------|---|
| Skeletal and Muscular System Development and Function | abnormal morphology of sphenoid bone           | 1.05E-03 | LMO4,PHC1           | 2 |
| Connective Tissue Development and Function            | abnormal morphology of sphenoid bone           | 1.05E-03 | LMO4,PHC1           | 2 |
| Organ Development                                     | abnormal morphology of sphenoid bone           | 1.05E-03 | LMO4,PHC1           | 2 |
| Organ Development                                     | function of gall bladder                       | 1.05E-03 | F2RL1,MUC1          | 2 |
| Cell Death and Survival                               | apoptosis of endothelial cell lines            | 1.12E-03 | DUSP4,TFRC,TNFSF10  | 3 |
| Cell Death and Survival                               | apoptosis of acute myeloblastic leukemia cells | 1.35E-03 | MUC1,TNFSF10        | 2 |
| Tumor Morphology                                      | apoptosis of acute myeloblastic leukemia cells | 1.35E-03 | MUC1,TNFSF10        | 2 |
| Tissue Morphology                                     | quantity of Langerhans cells                   | 1.35E-03 | IRF2,ITGB6          | 2 |
| Hematological System Development and Function         | quantity of Langerhans cells                   | 1.35E-03 | IRF2,ITGB6          | 2 |
| Inflammatory Response                                 | quantity of Langerhans cells                   | 1.35E-03 | IRF2,ITGB6          | 2 |
| Cell Morphology                                       | size of red blood cells                        | 1.35E-03 | PRKAA2,TNFSF10      | 2 |
| Hematological System Development and Function         | size of red blood cells                        | 1.35E-03 | PRKAA2,TNFSF10      | 2 |
| Hematopoiesis                                         | size of red blood cells                        | 1.35E-03 | PRKAA2,TNFSF10      | 2 |
| Cellular Assembly and Organization                    | clustering of mitochondria                     | 1.68E-03 | BID,TNFSF10         | 2 |
| Energy Production                                     | hydrolysis of ATP                              | 1.97E-03 | ABCD3,PRKAA2,RAD51B | 3 |
| Small Molecule Biochemistry                           | hydrolysis of ATP                              | 1.97E-03 | ABCD3,PRKAA2,RAD51B | 3 |
| DNA Replication, Recombination, and Repair            | hydrolysis of ATP                              | 1.97E-03 | ABCD3,PRKAA2,RAD51B | 3 |
| Nucleic Acid Metabolism                               | hydrolysis of ATP                              | 1.97E-03 | ABCD3,PRKAA2,RAD51B | 3 |
| Cell Death and Survival                               | apoptosis of mesothelioma cell lines           | 2.04E-03 | BID,TNFSF10         | 2 |
| Cellular Compromise                                   | degeneration of germ cells                     | 2.04E-03 | CADM1,WNT4          | 2 |
| Energy Production                                     | beta-oxidation of palmitic acid                | 2.44E-03 | ABCD3,BID           | 2 |
| Lipid Metabolism                                      | beta-oxidation of palmitic acid                | 2.44E-03 | ABCD3,BID           | 2 |
| Small Molecule Biochemistry                           | beta-oxidation of palmitic acid                | 2.44E-03 | ABCD3,BID           | 2 |
| Dermatological Diseases and Conditions                | hypotrichosis                                  | 2.44E-03 | HR,LIPH             | 2 |
| Organismal Injury and Abnormalities                   | injury of mice                                 | 2.76E-03 | BID,F2RL1,ITGB6     | 3 |
| Lipid Metabolism                                      | absorption of lipid                            | 2.94E-03 | CCRN4L,MUC1,TNFSF10 | 3 |
| Small Molecule Biochemistry                           | absorption of lipid                            | 2.94E-03 | CCRN4L,MUC1,TNFSF10 | 3 |
| Molecular Transport                                   | absorption of lipid                            | 2.94E-03 | CCRN4L,MUC1,TNFSF10 | 3 |
| Organ Morphology                                      | abnormal morphology of nose                    | 3.34E-03 | CDON,SIX1           | 2 |

|                                                         |                                            |          |                                    |   |
|---------------------------------------------------------|--------------------------------------------|----------|------------------------------------|---|
| Cell Death and Survival                                 | cell death of B cell lymphoma cells        | 3.34E-03 | EMP2,TNFSF10                       | 2 |
| Tumor Morphology                                        | cell death of B cell lymphoma cells        | 3.34E-03 | EMP2,TNFSF10                       | 2 |
| Cell Death and Survival                                 | cell death of pneumocytes                  | 3.34E-03 | BID,TNFSF10                        | 2 |
| Inflammatory Response                                   | inflammation of synovial joint             | 3.34E-03 | BID,F2RL1                          | 2 |
| Renal and Urological System Development and Function    | pH of urine                                | 3.34E-03 | KCNK5,SLC26A4                      | 2 |
| Cell-To-Cell Signaling and Interaction                  | response of fibroblast cell lines          | 3.34E-03 | IRAK4,TNFSF10                      | 2 |
| Connective Tissue Development and Function              | response of fibroblast cell lines          | 3.34E-03 | IRAK4,TNFSF10                      | 2 |
| Cell-To-Cell Signaling and Interaction                  | induction of lymphocytes                   | 3.73E-03 | MUC1,STEAP1,TNFSF10                | 3 |
| Hematological System Development and Function           | induction of lymphocytes                   | 3.73E-03 | MUC1,STEAP1,TNFSF10                | 3 |
| Cellular Growth and Proliferation                       | induction of lymphocytes                   | 3.73E-03 | MUC1,STEAP1,TNFSF10                | 3 |
| Organismal Injury and Abnormalities                     | cardiac fibrosis of heart                  | 3.84E-03 | IRAK4,MAPK11                       | 2 |
| Cardiovascular Disease                                  | cardiac fibrosis of heart                  | 3.84E-03 | IRAK4,MAPK11                       | 2 |
| Small Molecule Biochemistry                             | phosphorylation of nucleotide              | 3.84E-03 | MPP6 (includes EG:35343),NME5      | 2 |
| Nucleic Acid Metabolism                                 | phosphorylation of nucleotide              | 3.84E-03 | MPP6 (includes EG:35343),NME5      | 2 |
| Cell Morphology                                         | morphology of tumor cell lines             | 4.12E-03 | PRKAR2B,RASGRF1,SIX1,TNFSF10,TRPV6 | 5 |
| Organ Morphology                                        | abnormal morphology of endolymphatic duct  | 4.37E-03 | SIX1,SLC26A4                       | 2 |
| Auditory and Vestibular System Development and Function | abnormal morphology of endolymphatic duct  | 4.37E-03 | SIX1,SLC26A4                       | 2 |
| Dermatological Diseases and Conditions                  | disorder of hair                           | 4.50E-03 | HR,ITGB6,LIPH,TRPV6                | 4 |
| Carbohydrate Metabolism                                 | catabolism of carbohydrate                 | 4.64E-03 | PLA2G4B,PYGB,TREH                  | 3 |
| Tumor Morphology                                        | arrest in growth of cancer cells           | 4.93E-03 | MUC1,TNFSF10                       | 2 |
| Cellular Growth and Proliferation                       | arrest in growth of cancer cells           | 4.93E-03 | MUC1,TNFSF10                       | 2 |
| Cellular Development                                    | arrest in growth of cancer cells           | 4.93E-03 | MUC1,TNFSF10                       | 2 |
| Cell Morphology                                         | permeabilization of mitochondrial membrane | 4.93E-03 | BID,TNFSF10                        | 2 |
| Small Molecule Biochemistry                             | homeostasis of D-glucose                   | 5.25E-03 | F2RL1,FAM3B,PRKAA2,ST3GAL5,TREH    | 5 |
| Cellular Function and Maintenance                       | homeostasis of D-glucose                   | 5.25E-03 | F2RL1,FAM3B,PRKAA2,ST3GAL5,TREH    | 5 |

|                                                         |                                                                          |          |                                                                                                                                                                                            |    |
|---------------------------------------------------------|--------------------------------------------------------------------------|----------|--------------------------------------------------------------------------------------------------------------------------------------------------------------------------------------------|----|
| Carbohydrate Metabolism                                 | homeostasis of D-glucose                                                 | 5.25E-03 | F2RL1,FAM3B,PRKAA2,ST3GAL5,TREH                                                                                                                                                            | 5  |
|                                                         |                                                                          |          | ASPA,BARX2,CDON,CSTA,ELF3,EVPL,FZD5,HDAC9,HI<br>ST1H4A (includes<br>others),IFNGR2,IRF2,KRT4,LMO4,MUC1,PHC1,PPM1<br>L,PRKAR2B,RGS2 (includes<br>EG:19735),SIX1,TFRC,TNFSF10,UBD,UHRF2,WNT4 | 24 |
| Cellular Development                                    | differentiation of cells                                                 | 5.26E-03 | EG:19735),SIX1,TFRC,TNFSF10,UBD,UHRF2,WNT4                                                                                                                                                 | 2  |
| Respiratory Disease                                     | constriction of bronchus                                                 | 5.52E-03 | F2RL1,RGS2 (includes EG:19735)                                                                                                                                                             | 2  |
| Cellular Growth and Proliferation                       | proliferation of leukemia cell lines                                     | 5.63E-03 | DUSP4,MUC1,PHC1,PRKAR2B,TNFSF10                                                                                                                                                            | 5  |
| Cellular Development                                    | proliferation of leukemia cell lines                                     | 5.63E-03 | DUSP4,MUC1,PHC1,PRKAR2B,TNFSF10                                                                                                                                                            | 5  |
| Hematopoiesis                                           | maturation of dendritic cells                                            | 5.81E-03 | ELF3,F2RL1,IRAK4,TNFSF10                                                                                                                                                                   | 4  |
| Cellular Development                                    | maturation of dendritic cells                                            | 5.81E-03 | ELF3,F2RL1,IRAK4,TNFSF10                                                                                                                                                                   | 4  |
| Organ Morphology                                        | abnormal morphology of inner ear                                         | 6.15E-03 | SIX1,SLC26A4                                                                                                                                                                               | 2  |
| Auditory and Vestibular System Development and Function | abnormal morphology of inner ear                                         | 6.15E-03 | SIX1,SLC26A4                                                                                                                                                                               | 2  |
| Developmental Disorder                                  | Canavan disease                                                          | 6.24E-03 | ASPA                                                                                                                                                                                       | 1  |
| Hereditary Disorder                                     | Canavan disease                                                          | 6.24E-03 | ASPA                                                                                                                                                                                       | 1  |
| Metabolic Disease                                       | Canavan disease                                                          | 6.24E-03 | ASPA                                                                                                                                                                                       | 1  |
| Neurological Disease                                    | Canavan disease                                                          | 6.24E-03 | ASPA                                                                                                                                                                                       | 1  |
| Hereditary Disorder                                     | IRAK4 deficiency                                                         | 6.24E-03 | IRAK4                                                                                                                                                                                      | 1  |
| Immunological Disease                                   | IRAK4 deficiency                                                         | 6.24E-03 | IRAK4                                                                                                                                                                                      | 1  |
| Organismal Injury and Abnormalities                     | Palmoplantar keratoderma with deafness                                   | 6.24E-03 | GJB2                                                                                                                                                                                       | 1  |
| Dermatological Diseases and Conditions                  | Palmoplantar keratoderma with deafness                                   | 6.24E-03 | GJB2                                                                                                                                                                                       | 1  |
| Auditory Disease                                        | Palmoplantar keratoderma with deafness                                   | 6.24E-03 | GJB2                                                                                                                                                                                       | 1  |
| Hereditary Disorder                                     | Palmoplantar keratoderma with deafness                                   | 6.24E-03 | GJB2                                                                                                                                                                                       | 1  |
| Neurological Disease                                    | Palmoplantar keratoderma with deafness                                   | 6.24E-03 | GJB2                                                                                                                                                                                       | 1  |
| Auditory Disease                                        | Pendred's syndrome                                                       | 6.24E-03 | SLC26A4                                                                                                                                                                                    | 1  |
| Developmental Disorder                                  | Pendred's syndrome                                                       | 6.24E-03 | SLC26A4                                                                                                                                                                                    | 1  |
| Endocrine System Disorders                              | Pendred's syndrome                                                       | 6.24E-03 | SLC26A4                                                                                                                                                                                    | 1  |
| Hereditary Disorder                                     | Pendred's syndrome                                                       | 6.24E-03 | SLC26A4                                                                                                                                                                                    | 1  |
| Metabolic Disease                                       | Pendred's syndrome                                                       | 6.24E-03 | SLC26A4                                                                                                                                                                                    | 1  |
| Neurological Disease                                    | Pendred's syndrome                                                       | 6.24E-03 | SLC26A4                                                                                                                                                                                    | 1  |
| Developmental Disorder                                  | SERKAL syndrome, sex reversal, dysgenesis of kidneys, adrenals and lungs | 6.24E-03 | WNT4                                                                                                                                                                                       | 1  |
| Hereditary Disorder                                     | SERKAL syndrome, sex reversal, dysgenesis of kidneys, adrenals and lungs | 6.24E-03 | WNT4                                                                                                                                                                                       | 1  |
| Cell Death and Survival                                 | ablation of brain cancer cell lines                                      | 6.24E-03 | TNFSF10                                                                                                                                                                                    | 1  |

|                                                              |                                                           |          |         |   |
|--------------------------------------------------------------|-----------------------------------------------------------|----------|---------|---|
| Cancer                                                       | ablation of brain cancer cell lines                       | 6.24E-03 | TNFSF10 | 1 |
| Lipid Metabolism<br>Small Molecule                           | accumulation of palmitoyl-coenzyme A                      | 6.24E-03 | BID     | 1 |
| Biochemistry<br>Nucleic Acid                                 | accumulation of palmitoyl-coenzyme A                      | 6.24E-03 | BID     | 1 |
| Metabolism                                                   | accumulation of palmitoyl-coenzyme A                      | 6.24E-03 | BID     | 1 |
| Molecular Transport                                          | accumulation of palmitoyl-coenzyme A                      | 6.24E-03 | BID     | 1 |
| Dermatological<br>Diseases and<br>Conditions                 | acrodermatitis enteropathica                              | 6.24E-03 | SLC39A4 | 1 |
| Hereditary Disorder                                          | acrodermatitis enteropathica                              | 6.24E-03 | SLC39A4 | 1 |
| Metabolic Disease                                            | acrodermatitis enteropathica                              | 6.24E-03 | SLC39A4 | 1 |
| Lipid Metabolism<br>Small Molecule                           | aggregation of cholesterol                                | 6.24E-03 | MUC1    | 1 |
| Biochemistry<br>Dermatological<br>Diseases and<br>Conditions | aggregation of cholesterol                                | 6.24E-03 | MUC1    | 1 |
| Hereditary Disorder                                          | alopecia universalis congenita                            | 6.24E-03 | HR      | 1 |
| Neurological Disease                                         | amish infantile epilepsy syndrome                         | 6.24E-03 | ST3GAL5 | 1 |
| Tumor Morphology                                             | arrest in growth of acute myeloid<br>leukemia blast cells | 6.24E-03 | MUC1    | 1 |
| Cellular Growth and<br>Proliferation                         | arrest in growth of acute myeloid<br>leukemia blast cells | 6.24E-03 | MUC1    | 1 |
| Cellular Development                                         | arrest in growth of acute myeloid<br>leukemia blast cells | 6.24E-03 | MUC1    | 1 |
| Hematological System<br>Development and<br>Function          | arrest in maturation of pro-B<br>lymphocytes              | 6.24E-03 | PHC1    | 1 |
| Hematopoiesis                                                | arrest in maturation of pro-B<br>lymphocytes              | 6.24E-03 | PHC1    | 1 |
| Cellular Development                                         | arrest in maturation of pro-B<br>lymphocytes              | 6.24E-03 | PHC1    | 1 |
| Cell Cycle<br>Dermatological<br>Diseases and<br>Conditions   | arrest in mitosis of ovarian cancer cell<br>lines         | 6.24E-03 | ACRBP   | 1 |
| Developmental<br>Disorder                                    | atrachia with papular lesions                             | 6.24E-03 | HR      | 1 |
| Tissue Development                                           | atrachia with papular lesions                             | 6.24E-03 | HR      | 1 |
| Tissue Development                                           | attachment of spermatids                                  | 6.24E-03 | CADM1   | 1 |
| Cell-To-Cell Signaling<br>and Interaction                    | attachment of spermatids                                  | 6.24E-03 | CADM1   | 1 |
| Tissue Development                                           | attachment of spermatocytes                               | 6.24E-03 | CADM1   | 1 |
| Cell-To-Cell Signaling<br>and Interaction                    | attachment of spermatocytes                               | 6.24E-03 | CADM1   | 1 |
| Auditory Disease                                             | autosomal dominant deafness type 3A                       | 6.24E-03 | GJB2    | 1 |
| Hereditary Disorder                                          | autosomal dominant deafness type 3A                       | 6.24E-03 | GJB2    | 1 |



|                                                       |                                                                     |          |         |   |
|-------------------------------------------------------|---------------------------------------------------------------------|----------|---------|---|
| Neurological Disease                                  | autosomal dominant deafness type 3A                                 | 6.24E-03 | GJB2    | 1 |
| Connective Tissue Disorders                           | branchiootic syndrome 3                                             | 6.24E-03 | SIX1    | 1 |
| Hereditary Disorder                                   | branchiootic syndrome 3                                             | 6.24E-03 | SIX1    | 1 |
| Cellular Compromise                                   | breakdown of mitochondria                                           | 6.24E-03 | TNFSF10 | 1 |
| Cellular Function and Maintenance                     | budding of clathrin-coated pits                                     | 6.24E-03 | ANK1    | 1 |
| Cell Morphology                                       | budding of clathrin-coated pits                                     | 6.24E-03 | ANK1    | 1 |
| Cellular Assembly and Organization                    | budding of clathrin-coated pits                                     | 6.24E-03 | ANK1    | 1 |
| Small Molecule Biochemistry                           | catabolism of trehalose                                             | 6.24E-03 | TREH    | 1 |
| Carbohydrate Metabolism                               | catabolism of trehalose                                             | 6.24E-03 | TREH    | 1 |
| Cell Death and Survival                               | cell death of articular chondrocytes                                | 6.24E-03 | TNFSF10 | 1 |
| Cell Death and Survival                               | cell death of otic epithelial cells                                 | 6.24E-03 | SIX1    | 1 |
| Cell Death and Survival                               | cell death of outer hair cells                                      | 6.24E-03 | GJB2    | 1 |
| Tissue Development                                    | cell-cell contact of astrocytes                                     | 6.24E-03 | CADM1   | 1 |
| Cell-To-Cell Signaling and Interaction                | cell-cell contact of astrocytes                                     | 6.24E-03 | CADM1   | 1 |
| Tissue Development                                    | cell-cell contact of keratinocyte cancer cell lines                 | 6.24E-03 | TRPV6   | 1 |
| Cell-To-Cell Signaling and Interaction                | cell-cell contact of keratinocyte cancer cell lines                 | 6.24E-03 | TRPV6   | 1 |
| Tissue Morphology                                     | circumference of periosteum                                         | 6.24E-03 | IGFALS  | 1 |
| Skeletal and Muscular System Development and Function | circumference of periosteum                                         | 6.24E-03 | IGFALS  | 1 |
| Molecular Transport                                   | concentration of lactic acid                                        | 6.24E-03 | PRKAA2  | 1 |
| Lipid Metabolism                                      | conversion of diacylglycerol                                        | 6.24E-03 | LIPH    | 1 |
| Small Molecule Biochemistry                           | conversion of diacylglycerol                                        | 6.24E-03 | LIPH    | 1 |
| Cell-To-Cell Signaling and Interaction                | cytotoxic T lymphocyte response by monocyte-derived dendritic cells | 6.24E-03 | MUC1    | 1 |
| Inflammatory Response                                 | cytotoxic T lymphocyte response by monocyte-derived dendritic cells | 6.24E-03 | MUC1    | 1 |
| Gastrointestinal Disease                              | cytotoxic reaction of liver                                         | 6.24E-03 | TNFSF10 | 1 |
| Inflammatory Response                                 | cytotoxic reaction of liver                                         | 6.24E-03 | TNFSF10 | 1 |
| Cellular Compromise                                   | destabilization of lipid bilayer                                    | 6.24E-03 | BID     | 1 |
| Embryonic Development                                 | development of infundibulum of hair follicle                        | 6.24E-03 | HR      | 1 |
| Organismal Development                                | development of infundibulum of hair follicle                        | 6.24E-03 | HR      | 1 |

|                                            |                                                        |          |         |   |
|--------------------------------------------|--------------------------------------------------------|----------|---------|---|
| Tissue Development                         | development of infundibulum of hair follicle           | 6.24E-03 | HR      | 1 |
| Organ Development                          | development of infundibulum of hair follicle           | 6.24E-03 | HR      | 1 |
| Hair and Skin                              |                                                        |          |         |   |
| Development and Function                   | development of infundibulum of hair follicle           | 6.24E-03 | HR      | 1 |
| Embryonic                                  |                                                        |          |         |   |
| Development                                | development of primary palate                          | 6.24E-03 | CDON    | 1 |
| Organismal                                 |                                                        |          |         |   |
| Development                                | development of primary palate                          | 6.24E-03 | CDON    | 1 |
| Tissue Development                         | development of primary palate                          | 6.24E-03 | CDON    | 1 |
| Digestive System                           |                                                        |          |         |   |
| Development and Function                   | development of primary palate                          | 6.24E-03 | CDON    | 1 |
| DNA Replication, Recombination, and Repair | disintegration of genomes                              | 6.24E-03 | IRF2    | 1 |
| Cellular Compromise                        | disintegration of genomes                              | 6.24E-03 | IRF2    | 1 |
| Cellular Function and Maintenance          | endocytosis by keratinocytes                           | 6.24E-03 | F2RL1   | 1 |
| Renal and Urological                       |                                                        |          |         |   |
| System Development and Function            | entry into cell cycle progression of kidney cell lines | 6.24E-03 | WNT4    | 1 |
| Cell Cycle                                 | entry into cell cycle progression of kidney cell lines | 6.24E-03 | WNT4    | 1 |
| Cancer                                     | exchange of tumor cell lines                           | 6.24E-03 | SLC26A4 | 1 |
| Tissue Morphology                          | fusion of glossopharyngeal cranial nerve ganglion      | 6.24E-03 | LMO4    | 1 |
| Nervous System                             |                                                        |          |         |   |
| Development and Function                   | fusion of glossopharyngeal cranial nerve ganglion      | 6.24E-03 | LMO4    | 1 |
| Tissue Morphology                          | fusion of vagus cranial nerve ganglion                 | 6.24E-03 | LMO4    | 1 |
| Nervous System                             |                                                        |          |         |   |
| Development and Function                   | fusion of vagus cranial nerve ganglion                 | 6.24E-03 | LMO4    | 1 |
| Lipid Metabolism                           | generation of oleoylethanolamide                       | 6.24E-03 | NAPEPLD | 1 |
| Small Molecule                             |                                                        |          |         |   |
| Biochemistry                               | generation of oleoylethanolamide                       | 6.24E-03 | NAPEPLD | 1 |
| Lipid Metabolism                           | generation of palmitoylethanolamide                    | 6.24E-03 | NAPEPLD | 1 |
| Small Molecule                             |                                                        |          |         |   |
| Biochemistry                               | generation of palmitoylethanolamide                    | 6.24E-03 | NAPEPLD | 1 |
| Vitamin and Mineral                        |                                                        |          |         |   |
| Metabolism                                 | generation of palmitoylethanolamide                    | 6.24E-03 | NAPEPLD | 1 |
| Tumor Morphology                           | growth of cholangiocarcinoma cell                      | 6.24E-03 | TNFSF10 | 1 |
| Cellular Growth and Proliferation          | growth of cholangiocarcinoma cell                      | 6.24E-03 | TNFSF10 | 1 |
| Cellular Development                       | growth of cholangiocarcinoma cell                      | 6.24E-03 | TNFSF10 | 1 |

|                                                       |                                            |          |         |   |
|-------------------------------------------------------|--------------------------------------------|----------|---------|---|
| Skeletal and Muscular System Development and Function | height of zone of hypertrophy              | 6.24E-03 | IGFALS  | 1 |
| Skeletal and Muscular System Development and Function | height of zone of proliferation            | 6.24E-03 | IGFALS  | 1 |
| Hereditary Disorder                                   | histidinemia                               | 6.24E-03 | HAL     | 1 |
| Metabolic Disease                                     | histidinemia                               | 6.24E-03 | HAL     | 1 |
| Connective Tissue Disorders                           | holoprosencephaly type 11                  | 6.24E-03 | CDON    | 1 |
| Developmental Disorder                                | holoprosencephaly type 11                  | 6.24E-03 | CDON    | 1 |
| Neurological Disease                                  | holoprosencephaly type 11                  | 6.24E-03 | CDON    | 1 |
| Skeletal and Muscular Disorders                       | holoprosencephaly type 11                  | 6.24E-03 | CDON    | 1 |
| Small Molecule Biochemistry                           | hydrolysis of trehalose                    | 6.24E-03 | TREH    | 1 |
| Carbohydrate Metabolism                               | hydrolysis of trehalose                    | 6.24E-03 | TREH    | 1 |
| Cancer                                                | hyperplasia of CD4+ T-lymphocytes          | 6.24E-03 | DUSP4   | 1 |
| Hematological Disease                                 | hyperplasia of CD4+ T-lymphocytes          | 6.24E-03 | DUSP4   | 1 |
| Immunological Disease                                 | hyperplasia of CD4+ T-lymphocytes          | 6.24E-03 | DUSP4   | 1 |
| Dermatological Diseases and Conditions                | hypotrichosis type 4                       | 6.24E-03 | HR      | 1 |
| Organismal Injury and Abnormalities                   | hystrix ichthyosis with deafness           | 6.24E-03 | GJB2    | 1 |
| Dermatological Diseases and Conditions                | hystrix ichthyosis with deafness           | 6.24E-03 | GJB2    | 1 |
| Developmental Disorder                                | hystrix ichthyosis with deafness           | 6.24E-03 | GJB2    | 1 |
| Hereditary Disorder                                   | hystrix ichthyosis with deafness           | 6.24E-03 | GJB2    | 1 |
| Embryonic Development                                 | induction of renal vesicle                 | 6.24E-03 | WNT4    | 1 |
| Organismal Development                                | induction of renal vesicle                 | 6.24E-03 | WNT4    | 1 |
| Tissue Morphology                                     | induction of renal vesicle                 | 6.24E-03 | WNT4    | 1 |
| Immunological Disease                                 | infection of lymphoid cells                | 6.24E-03 | CXADR   | 1 |
| Infectious Disease                                    | infection of lymphoid cells                | 6.24E-03 | CXADR   | 1 |
| Hematological System Development and Function         | inhibition of erythroblasts                | 6.24E-03 | TNFSF10 | 1 |
| Cellular Growth and Proliferation                     | inhibition of erythroblasts                | 6.24E-03 | TNFSF10 | 1 |
| Cellular Growth and Proliferation                     | inhibition of hepatocytes                  | 6.24E-03 | TNFSF10 | 1 |
| Organismal Injury and Abnormalities                   | keratitis ichthyosis and deafness syndrome | 6.24E-03 | GJB2    | 1 |

|                                                       |                                                 |          |         |   |
|-------------------------------------------------------|-------------------------------------------------|----------|---------|---|
| Dermatological Diseases and Conditions                | keratitis ichthyosis and deafness syndrome      | 6.24E-03 | GJB2    | 1 |
| Developmental Disorder                                | keratitis ichthyosis and deafness syndrome      | 6.24E-03 | GJB2    | 1 |
| Hereditary Disorder                                   | keratitis ichthyosis and deafness syndrome      | 6.24E-03 | GJB2    | 1 |
| Dermatological Diseases and Conditions                | knuckle pads, deafness and leukonychia syndrome | 6.24E-03 | GJB2    | 1 |
| Developmental Disorder                                | knuckle pads, deafness and leukonychia syndrome | 6.24E-03 | GJB2    | 1 |
| Hereditary Disorder                                   | knuckle pads, deafness and leukonychia syndrome | 6.24E-03 | GJB2    | 1 |
| Skeletal and Muscular Disorders                       | knuckle pads, deafness and leukonychia syndrome | 6.24E-03 | GJB2    | 1 |
| Cardiovascular Disease                                | large vessel stroke                             | 6.24E-03 | HDAC9   | 1 |
| Neurological Disease                                  | large vessel stroke                             | 6.24E-03 | HDAC9   | 1 |
| Developmental Disorder                                | mullerian aplasia                               | 6.24E-03 | WNT4    | 1 |
| Reproductive System Disease                           | mullerian aplasia                               | 6.24E-03 | WNT4    | 1 |
| Embryonic Development                                 | myogenesis of embryo                            | 6.24E-03 | SIX1    | 1 |
| Organismal Development                                | myogenesis of embryo                            | 6.24E-03 | SIX1    | 1 |
| Tissue Development                                    | myogenesis of embryo                            | 6.24E-03 | SIX1    | 1 |
| Skeletal and Muscular System Development and Function | myogenesis of embryo                            | 6.24E-03 | SIX1    | 1 |
| Organ Development                                     | myogenesis of embryo                            | 6.24E-03 | SIX1    | 1 |
| Auditory Disease                                      | nonsyndromic recessive deafness DFNB1A          | 6.24E-03 | GJB2    | 1 |
| Hereditary Disorder                                   | nonsyndromic recessive deafness DFNB1A          | 6.24E-03 | GJB2    | 1 |
| Neurological Disease                                  | nonsyndromic recessive deafness DFNB1A          | 6.24E-03 | GJB2    | 1 |
| Inflammatory Disease                                  | paralytic autoimmune myositis                   | 6.24E-03 | IFNGR2  | 1 |
| Skeletal and Muscular Disorders                       | paralytic autoimmune myositis                   | 6.24E-03 | IFNGR2  | 1 |
| Cellular Growth and Proliferation                     | proliferation of otic epithelial cells          | 6.24E-03 | SIX1    | 1 |
| Lipid Metabolism                                      | quantity of L-alpha-palmitoylcholine            | 6.24E-03 | TNFSF10 | 1 |
| Small Molecule Biochemistry                           | quantity of L-alpha-palmitoylcholine            | 6.24E-03 | TNFSF10 | 1 |
| Molecular Transport                                   | quantity of L-alpha-palmitoylcholine            | 6.24E-03 | TNFSF10 | 1 |

|                                                           |                                                          |          |                          |   |
|-----------------------------------------------------------|----------------------------------------------------------|----------|--------------------------|---|
| Carbohydrate Metabolism Organismal Development            | quantity of L-alpha-palmitoylcholine phosphatidylcholine | 6.24E-03 | TNFSF10                  | 1 |
|                                                           | re-endothelialization of carotid artery                  | 6.24E-03 | PDZK1                    | 1 |
| Cardiovascular System Development and Function            |                                                          |          |                          |   |
|                                                           | re-endothelialization of carotid artery                  | 6.24E-03 | PDZK1                    | 1 |
| Small Molecule Biochemistry                               |                                                          |          |                          |   |
|                                                           | regulation of nitric oxide                               | 6.24E-03 | IRF2                     | 1 |
| Cell Signaling                                            | regulation of nitric oxide                               | 6.24E-03 | IRF2                     | 1 |
| Tissue Morphology                                         | relaxation of bronchial tissue                           | 6.24E-03 | F2RL1                    | 1 |
| Respiratory System Development and Function               |                                                          |          |                          |   |
|                                                           | relaxation of bronchial tissue                           | 6.24E-03 | F2RL1                    | 1 |
| Organ Morphology                                          | relaxation of bronchus                                   | 6.24E-03 | F2RL1                    | 1 |
| Respiratory System Development and Function               |                                                          |          |                          |   |
|                                                           | relaxation of bronchus                                   | 6.24E-03 | F2RL1                    | 1 |
|                                                           | relaxation of mesenteric resistance artery               | 6.24E-03 | RGS2 (includes EG:19735) | 1 |
| Cardiovascular System Development and Function            |                                                          |          |                          |   |
|                                                           | relaxation of mesenteric resistance artery               | 6.24E-03 | RGS2 (includes EG:19735) | 1 |
| Organ Morphology                                          | relaxation of trachea                                    | 6.24E-03 | F2RL1                    | 1 |
| Respiratory System Development and Function               |                                                          |          |                          |   |
|                                                           | relaxation of trachea                                    | 6.24E-03 | F2RL1                    | 1 |
| Cell-To-Cell Signaling and Interaction                    |                                                          |          |                          |   |
|                                                           | response of myeloid leukocytes                           | 6.24E-03 | IRAK4                    | 1 |
| Cellular Compromise                                       | rupture of lipid bilayer                                 | 6.24E-03 | BID                      | 1 |
| Cell Death and Survival Cellular Function and Maintenance |                                                          |          |                          |   |
|                                                           | self-renewal of leukemia cell lines                      | 6.24E-03 | MUC1                     | 1 |
|                                                           | self-renewal of leukemia cell lines                      | 6.24E-03 | MUC1                     | 1 |
| Cellular Development                                      | self-renewal of leukemia cell lines                      | 6.24E-03 | MUC1                     | 1 |
| Cellular Response to Therapeutics                         |                                                          |          |                          |   |
|                                                           | sensitivity of astrocytes                                | 6.24E-03 | TNFSF10                  | 1 |
| Lipid Metabolism                                          | sialylation of lactosylceramide                          | 6.24E-03 | ST3GAL5                  | 1 |
| Small Molecule Biochemistry                               |                                                          |          |                          |   |
|                                                           | sialylation of lactosylceramide                          | 6.24E-03 | ST3GAL5                  | 1 |
| Post-Translational Modification                           | sialylation of lactosylceramide                          | 6.24E-03 | ST3GAL5                  | 1 |
| Cell Morphology                                           | size of colony-forming erythroid cells                   | 6.24E-03 | TNFSF10                  | 1 |
| Hematological System Development and Function             |                                                          |          |                          |   |
|                                                           | size of colony-forming erythroid cells                   | 6.24E-03 | TNFSF10                  | 1 |
| Hematopoiesis                                             | size of colony-forming erythroid cells                   | 6.24E-03 | TNFSF10                  | 1 |
| Organ Morphology                                          | size of endolymphatic sac                                | 6.24E-03 | SIX1                     | 1 |

|                                                         |                                                  |          |                          |   |
|---------------------------------------------------------|--------------------------------------------------|----------|--------------------------|---|
| Auditory and Vestibular System Development and Function | size of endolymphatic sac                        | 6.24E-03 | SIX1                     | 1 |
| Cancer                                                  | soft tissue neoplasm                             | 6.24E-03 | P2RX6                    | 1 |
| Skeletal and Muscular System Development and Function   | stabilization of sarcoplasmic reticulum          | 6.24E-03 | ANK1                     | 1 |
| Cellular Assembly and Organization                      | stabilization of sarcoplasmic reticulum          | 6.24E-03 | ANK1                     | 1 |
| Embryonic Development                                   | stratification of keratinocyte cancer cell lines | 6.24E-03 | TRPV6                    | 1 |
| Tissue Development                                      | stratification of keratinocyte cancer cell lines | 6.24E-03 | TRPV6                    | 1 |
| Cell Morphology                                         | stratification of keratinocyte cancer cell lines | 6.24E-03 | TRPV6                    | 1 |
| Cellular Development                                    | stratification of keratinocyte cancer cell lines | 6.24E-03 | TRPV6                    | 1 |
| Cell-To-Cell Signaling and Interaction                  | structural integrity of tight junctions          | 6.24E-03 | CXADR                    | 1 |
| Cell Morphology                                         | structural integrity of tight junctions          | 6.24E-03 | CXADR                    | 1 |
| Cellular Assembly and Organization                      | structural integrity of tight junctions          | 6.24E-03 | CXADR                    | 1 |
| Developmental Disorder                                  | succinyl-coa acetoacetate transferase deficiency | 6.24E-03 | OXCT1                    | 1 |
| Hereditary Disorder                                     | succinyl-coa acetoacetate transferase deficiency | 6.24E-03 | OXCT1                    | 1 |
| Metabolic Disease                                       | succinyl-coa acetoacetate transferase deficiency | 6.24E-03 | OXCT1                    | 1 |
| Cell Death and Survival                                 | survival of non-small-cell lung cancer cells     | 6.24E-03 | TNFSF10                  | 1 |
| Tumor Morphology                                        | survival of non-small-cell lung cancer cells     | 6.24E-03 | TNFSF10                  | 1 |
| Cancer                                                  | survival of non-small-cell lung cancer cells     | 6.24E-03 | TNFSF10                  | 1 |
| Lipid Metabolism Small Molecule                         | synthesis of ganglioside GM2                     | 6.24E-03 | ST3GAL5                  | 1 |
| Biochemistry                                            | synthesis of ganglioside GM2                     | 6.24E-03 | ST3GAL5                  | 1 |
| Organ Morphology                                        | thickness of colon                               | 6.24E-03 | F2RL1                    | 1 |
| Digestive System Development and Function               | thickness of colon                               | 6.24E-03 | F2RL1                    | 1 |
| Tissue Morphology                                       | thickness of vascular smooth muscle cells        | 6.24E-03 | RGS2 (includes EG:19735) | 1 |
| Skeletal and Muscular System Development and Function   | thickness of vascular smooth muscle cells        | 6.24E-03 | RGS2 (includes EG:19735) | 1 |
| Cell Morphology                                         | thickness of vascular smooth muscle cells        | 6.24E-03 | RGS2 (includes EG:19735) | 1 |
| Tumor Morphology                                        | transdifferentiation of malignant tumor          | 6.24E-03 | MUC1                     | 1 |
| Cellular Development                                    | transdifferentiation of malignant tumor          | 6.24E-03 | MUC1                     | 1 |

|                                                       |                                          |          |                                             |   |
|-------------------------------------------------------|------------------------------------------|----------|---------------------------------------------|---|
| Cancer                                                | transdifferentiation of malignant tumor  | 6.24E-03 | MUC1                                        | 1 |
| Cellular Development                                  | transition of breast cell lines          | 6.24E-03 | ELF3                                        | 1 |
| Reproductive System Development and Function          | transition of breast cell lines          | 6.24E-03 | ELF3                                        | 1 |
| Lipid Metabolism Small Molecule                       | translocation of BODIPY FL C5-HPC        | 6.24E-03 | BID                                         | 1 |
| Biochemistry                                          | translocation of BODIPY FL C5-HPC        | 6.24E-03 | BID                                         | 1 |
| Molecular Transport                                   | translocation of BODIPY FL C5-HPC        | 6.24E-03 | BID                                         | 1 |
| Cellular Movement                                     | translocation of spermatids              | 6.24E-03 | CADM1                                       | 1 |
| Infectious Disease                                    | viral entry by Machupo virus             | 6.24E-03 | TFRC                                        | 1 |
| Infectious Disease                                    | viral entry by mouse mammary tumor virus | 6.24E-03 | TFRC                                        | 1 |
| Developmental Disorder                                | x-linked mental retardation type 90      | 6.24E-03 | DLG3                                        | 1 |
| Hereditary Disorder                                   | x-linked mental retardation type 90      | 6.24E-03 | DLG3                                        | 1 |
| Neurological Disease                                  | x-linked mental retardation type 90      | 6.24E-03 | DLG3                                        | 1 |
| Cell Death and Survival                               | apoptosis of breast cancer cell lines    | 6.40E-03 | BCL2L13,BID,DUSP4,MUC1,TFRC,TNFSF10         | 6 |
| Organismal Survival                                   | pain threshold                           | 6.80E-03 | ASPA,F2RL1                                  | 2 |
| Digestive System Development and Function             | salivation                               | 6.80E-03 | F2RL1,SLC9A2                                | 2 |
| Cellular Movement                                     | translocation of cells                   | 6.80E-03 | CADM1,F2RL1                                 | 2 |
| Tissue Development                                    | cell-cell contact                        | 7.14E-03 | CADM1,CDON,CXADR,TRPV6                      | 4 |
| Cell-To-Cell Signaling and Interaction                | cell-cell contact                        | 7.14E-03 | CADM1,CDON,CXADR,TRPV6                      | 4 |
| Energy Production                                     | beta-oxidation of fatty acid             | 7.45E-03 | ABCD3,BID,SLC27A2                           | 3 |
| Lipid Metabolism Small Molecule                       | beta-oxidation of fatty acid             | 7.45E-03 | ABCD3,BID,SLC27A2                           | 3 |
| Biochemistry                                          | beta-oxidation of fatty acid             | 7.45E-03 | ABCD3,BID,SLC27A2                           | 3 |
| Auditory Disease                                      | nonsyndromic hearing impairment          | 7.49E-03 | GJB2,SLC26A4                                | 2 |
| Hereditary Disorder                                   | nonsyndromic hearing impairment          | 7.49E-03 | GJB2,SLC26A4                                | 2 |
| Neurological Disease                                  | nonsyndromic hearing impairment          | 7.49E-03 | GJB2,SLC26A4                                | 2 |
| Immunological Disease                                 | delayed hypersensitive reaction          | 7.55E-03 | F2RL1,HAL,IFNGR2,TNFSF10                    | 4 |
| Carbohydrate Metabolism                               | hydrolysis of carbohydrate               | 7.55E-03 | F2RL1,RGS2 (includes EG:19735),TNFSF10,TREH | 4 |
| Embryonic Development                                 | development of striated muscle           | 7.76E-03 | CDON,F2RL1,RGS2 (includes EG:19735),SIX1    | 4 |
| Organismal Development                                | development of striated muscle           | 7.76E-03 | CDON,F2RL1,RGS2 (includes EG:19735),SIX1    | 4 |
| Tissue Development                                    | development of striated muscle           | 7.76E-03 | CDON,F2RL1,RGS2 (includes EG:19735),SIX1    | 4 |
| Skeletal and Muscular System Development and Function | development of striated muscle           | 7.76E-03 | CDON,F2RL1,RGS2 (includes EG:19735),SIX1    | 4 |
| Organ Development                                     | development of striated muscle           | 7.76E-03 | CDON,F2RL1,RGS2 (includes EG:19735),SIX1    | 4 |

|                                                         |                                           |          |                                                                                 |    |
|---------------------------------------------------------|-------------------------------------------|----------|---------------------------------------------------------------------------------|----|
| Organismal Injury and Abnormalities                     | fibrosis                                  | 8.41E-03 | BARX2,BID,ELF3,IFNGR2,IRAK4,IRF2,KRT19 (includes EG:16669),MAPK11,UBD           | 9  |
| Cellular Development                                    | differentiation of epithelial cells       | 8.56E-03 | CSTA,EVPL,KRT4,LMO4,SIX1,TNFSF10                                                | 6  |
| Inflammatory Response                                   | inflammation of organ                     | 8.57E-03 | BID,ELF3,F2RL1,IFNGR2,IRAK4,IRF2,ITGB6,MAPK11,MUC1,PGLYRP1,SLC9A2,TNFSF10       | 12 |
| Embryonic Development                                   | development of muscle                     | 8.64E-03 | CDON,CXADR,F2RL1,KRT19 (includes EG:16669),POU6F1,RGS2 (includes EG:19735),SIX1 | 7  |
| Organismal Development                                  | development of muscle                     | 8.64E-03 | CDON,CXADR,F2RL1,KRT19 (includes EG:16669),POU6F1,RGS2 (includes EG:19735),SIX1 | 7  |
| Tissue Development                                      | development of muscle                     | 8.64E-03 | CDON,CXADR,F2RL1,KRT19 (includes EG:16669),POU6F1,RGS2 (includes EG:19735),SIX1 | 7  |
| Skeletal and Muscular System Development and Function   | development of muscle                     | 8.64E-03 | CDON,CXADR,F2RL1,KRT19 (includes EG:16669),POU6F1,RGS2 (includes EG:19735),SIX1 | 7  |
| Organ Development                                       | development of muscle                     | 8.64E-03 | CDON,CXADR,F2RL1,KRT19 (includes EG:16669),POU6F1,RGS2 (includes EG:19735),SIX1 | 7  |
| Molecular Transport                                     | transport of ion                          | 8.69E-03 | ANK1,CLCA4,KCNK5,P2RX6,PDZK1,SLC26A4,SLC39A4,SLC9A2,TRPV6                       | 9  |
| Free Radical Scavenging                                 | formation of reactive oxygen species      | 8.80E-03 | BID,NOXA1,TFRC                                                                  | 3  |
| Organ Morphology                                        | abnormal morphology of vibrissae          | 8.95E-03 | F2RL1,LIPH                                                                      | 2  |
| Hair and Skin Development and Function                  | abnormal morphology of vibrissae          | 8.95E-03 | F2RL1,LIPH                                                                      | 2  |
| Organismal Survival                                     | survival of organism                      | 9.92E-03 | BID,DUSP4,F2RL1,FZD5,IRAK4,IRF2,ITGB6,KRT19 (includes EG:16669),PHC1,TNFSF10    | 10 |
| Protein Synthesis                                       | oligomerization of protein                | 9.94E-03 | BID,HR,MUC20,P2RX6,PRKAA2                                                       | 5  |
| Gastrointestinal Disease                                | colon cancer                              | 1.01E-02 | ABCD3,HIST1H4A (includes others),LIPH,MUC1,PPM1L,SLC27A2,SULT1C2,TFRC,TNFSF10   | 9  |
| Cancer                                                  | colon cancer                              | 1.01E-02 | ABCD3,HIST1H4A (includes others),LIPH,MUC1,PPM1L,SLC27A2,SULT1C2,TFRC,TNFSF10   | 9  |
| Cell Death and Survival                                 | apoptosis of liver cell lines             | 1.05E-02 | DUSP4,TNFSF10                                                                   | 2  |
| Cellular Movement                                       | release of cells                          | 1.05E-02 | CADM1,TFRC                                                                      | 2  |
| Cancer                                                  | bladder cancer                            | 1.12E-02 | AIM1 (includes EG:11630),GJB2,KRT19 (includes EG:16669),PGLYRP1                 | 4  |
| Renal and Urological Disease                            | bladder cancer                            | 1.12E-02 | AIM1 (includes EG:11630),GJB2,KRT19 (includes EG:16669),PGLYRP1                 | 4  |
| Organ Morphology                                        | abnormal morphology of hair follicle      | 1.14E-02 | HR,ITGB6                                                                        | 2  |
| Organ Morphology                                        | abnormal morphology of semicircular canal | 1.14E-02 | SIX1,SLC26A4                                                                    | 2  |
| Auditory and Vestibular System Development and Function | abnormal morphology of semicircular canal | 1.14E-02 | SIX1,SLC26A4                                                                    | 2  |
| Auditory Disease                                        | autosomal dominant deafness               | 1.22E-02 | GJB2,SIX1                                                                       | 2  |
| Hereditary Disorder                                     | autosomal dominant deafness               | 1.22E-02 | GJB2,SIX1                                                                       | 2  |
| Neurological Disease                                    | autosomal dominant deafness               | 1.22E-02 | GJB2,SIX1                                                                       | 2  |



|                                                       |                                                      |          |         |   |
|-------------------------------------------------------|------------------------------------------------------|----------|---------|---|
| Organismal Injury and Abnormalities                   | Vohwinkel syndrome                                   | 1.24E-02 | GJB2    | 1 |
| Dermatological Diseases and Conditions                | Vohwinkel syndrome                                   | 1.24E-02 | GJB2    | 1 |
| Hereditary Disorder                                   | Vohwinkel syndrome                                   | 1.24E-02 | GJB2    | 1 |
| Organ Morphology                                      | abnormal morphology of nares                         | 1.24E-02 | SIX1    | 1 |
| Tissue Morphology                                     | abnormal morphology of strial basal cells            | 1.24E-02 | SLC26A4 | 1 |
| Cell Morphology                                       | abnormal morphology of strial basal cells            | 1.24E-02 | SLC26A4 | 1 |
| Cellular Function and Maintenance                     | absorption of chloride                               | 1.24E-02 | SLC26A4 | 1 |
| Molecular Transport                                   | absorption of chloride                               | 1.24E-02 | SLC26A4 | 1 |
| Tissue Development                                    | accumulation of fibroblast cell lines                | 1.24E-02 | BID     | 1 |
| Connective Tissue Development and Function            | accumulation of fibroblast cell lines                | 1.24E-02 | BID     | 1 |
| Tissue Development                                    | adherence of astrocytes                              | 1.24E-02 | CADM1   | 1 |
| Embryonic Development                                 | angiogenesis of adductor muscle                      | 1.24E-02 | F2RL1   | 1 |
| Organismal Development                                | angiogenesis of adductor muscle                      | 1.24E-02 | F2RL1   | 1 |
| Tissue Development                                    | angiogenesis of adductor muscle                      | 1.24E-02 | F2RL1   | 1 |
| Skeletal and Muscular System Development and Function | angiogenesis of adductor muscle                      | 1.24E-02 | F2RL1   | 1 |
| Organ Development                                     | angiogenesis of adductor muscle                      | 1.24E-02 | F2RL1   | 1 |
| Cardiovascular System Development and Function        | angiogenesis of adductor muscle                      | 1.24E-02 | F2RL1   | 1 |
|                                                       | anti-pneumococcal polysaccharide                     | 1.24E-02 | F2RL1   | 1 |
| Hematological Disease                                 | antibody deficiency                                  | 1.24E-02 | IRAK4   | 1 |
| Immunological Disease                                 | anti-pneumococcal polysaccharide antibody deficiency | 1.24E-02 | IRAK4   | 1 |
| Cell Death and Survival                               | apoptosis of Kupffer cells                           | 1.24E-02 | IRF2    | 1 |
| Cell Death and Survival                               | apoptosis of cholangiocarcinoma cell                 | 1.24E-02 | TNFSF10 | 1 |
| Tumor Morphology                                      | apoptosis of cholangiocarcinoma cell                 | 1.24E-02 | TNFSF10 | 1 |
| Cell Death and Survival                               | apoptosis of leukemic blasts                         | 1.24E-02 | TNFSF10 | 1 |
| Tumor Morphology                                      | apoptosis of leukemic blasts                         | 1.24E-02 | TNFSF10 | 1 |
| Cell Death and Survival                               | apoptosis of squamous-cell carcinoma                 | 1.24E-02 | TNFSF10 | 1 |
| Cancer                                                | apoptosis of squamous-cell carcinoma                 | 1.24E-02 | TNFSF10 | 1 |
| Cell Cycle                                            | arrest in cell cycle progression of splenocytes      | 1.24E-02 | PHC1    | 1 |
| Embryonic Development                                 | arrest in growth of trophoblast                      | 1.24E-02 | F2RL1   | 1 |

|                         |                                        |          |                           |   |
|-------------------------|----------------------------------------|----------|---------------------------|---|
| Tissue Development      | arrest in growth of trophoblast        | 1.24E-02 | F2RL1                     | 1 |
|                         | arrest in mitosis of lung cancer cell  |          |                           |   |
| Cell Cycle              | lines                                  | 1.24E-02 | ACRBP                     | 1 |
| Embryonic               | arrest in spermatogenesis of           |          |                           |   |
| Development             | spermatids                             | 1.24E-02 | CADM1                     | 1 |
| Organismal              | arrest in spermatogenesis of           |          |                           |   |
| Development             | spermatids                             | 1.24E-02 | CADM1                     | 1 |
|                         | arrest in spermatogenesis of           |          |                           |   |
| Tissue Development      | spermatids                             | 1.24E-02 | CADM1                     | 1 |
|                         | arrest in spermatogenesis of           |          |                           |   |
| Organ Development       | spermatids                             | 1.24E-02 | CADM1                     | 1 |
|                         | arrest in spermatogenesis of           |          |                           |   |
| Cellular Development    | spermatids                             | 1.24E-02 | CADM1                     | 1 |
| Reproductive System     |                                        |          |                           |   |
| Development and         | arrest in spermatogenesis of           |          |                           |   |
| Function                | spermatids                             | 1.24E-02 | CADM1                     | 1 |
| Skeletal and Muscular   |                                        |          |                           |   |
| System Development      |                                        |          |                           |   |
| and Function            | association of rib                     | 1.24E-02 | PHC1                      | 1 |
| Connective Tissue       |                                        |          |                           |   |
| Development and         |                                        |          |                           |   |
| Function                | association of rib                     | 1.24E-02 | PHC1                      | 1 |
| Infectious Disease      | binding of adenoviridae                | 1.24E-02 | CXADR                     | 1 |
| Cell-To-Cell Signaling  |                                        |          |                           |   |
| and Interaction         | binding of bladder cancer cell lines   | 1.24E-02 | CXADR                     | 1 |
| Neurological Disease    | bradyopsia                             | 1.24E-02 | RGS9BP                    | 1 |
| Cell Death and Survival | cell death of duct cancer cell lines   | 1.24E-02 | TNFSF10                   | 1 |
| Cell Death and Survival | cytolysis of breast cancer cell lines  | 1.24E-02 | TNFSF10                   | 1 |
| Embryonic               |                                        |          |                           |   |
| Development             | cytolysis of trophoblast giant cells   | 1.24E-02 | KRT19 (includes EG:16669) | 1 |
| Cell Death and Survival | cytolysis of trophoblast giant cells   | 1.24E-02 | KRT19 (includes EG:16669) | 1 |
| Cell Death and Survival | cytotoxicity of T cell blasts          | 1.24E-02 | TNFSF10                   | 1 |
| Cell Death and Survival | cytotoxicity of carcinoma cell lines   | 1.24E-02 | TNFSF10                   | 1 |
| Cell Death and Survival | cytotoxicity of lung cancer cell lines | 1.24E-02 | TNFSF10                   | 1 |
| Gastrointestinal        |                                        |          |                           |   |
| Disease                 | damage of small intestine              | 1.24E-02 | MUC1                      | 1 |
| Organismal Injury and   |                                        |          |                           |   |
| Abnormalities           | damage of small intestine              | 1.24E-02 | MUC1                      | 1 |
| Cellular Compromise     | degeneration of spermatids             | 1.24E-02 | CADM1                     | 1 |
| Cellular Compromise     | degeneration of type I fibrocytes      | 1.24E-02 | SLC26A4                   | 1 |
|                         | delay in cell death of cervical cancer |          |                           |   |
| Cell Death and Survival | cell lines                             | 1.24E-02 | TNFSF10                   | 1 |
| Cellular Compromise     | depletion of oocytes                   | 1.24E-02 | WNT4                      | 1 |

|                                                        |                                                       |          |         |   |
|--------------------------------------------------------|-------------------------------------------------------|----------|---------|---|
| Tissue Development Embryonic                           | development of epithelial barrier                     | 1.24E-02 | GJB2    | 1 |
| Development Organismal                                 | development of occipital bone                         | 1.24E-02 | PHC1    | 1 |
| Development                                            | development of occipital bone                         | 1.24E-02 | PHC1    | 1 |
| Tissue Development                                     | development of occipital bone                         | 1.24E-02 | PHC1    | 1 |
| Skeletal and Muscular System Development and Function  | development of occipital bone                         | 1.24E-02 | PHC1    | 1 |
| Connective Tissue Development and Function             | development of occipital bone                         | 1.24E-02 | PHC1    | 1 |
| Organ Development                                      | development of occipital bone                         | 1.24E-02 | PHC1    | 1 |
| Tumor Morphology                                       | differentiation of chronic myelogenous leukemia cells | 1.24E-02 | MUC1    | 1 |
| Cellular Development                                   | differentiation of chronic myelogenous leukemia cells | 1.24E-02 | MUC1    | 1 |
| Cancer                                                 | differentiation of chronic myelogenous leukemia cells | 1.24E-02 | MUC1    | 1 |
| Hematological System Development and Function          | differentiation of reticulocytes                      | 1.24E-02 | TFRC    | 1 |
| Hematopoiesis                                          | differentiation of reticulocytes                      | 1.24E-02 | TFRC    | 1 |
| Cellular Development Cellular Function and Maintenance | differentiation of reticulocytes                      | 1.24E-02 | TFRC    | 1 |
| Molecular Transport                                    | efflux of iodide                                      | 1.24E-02 | SLC26A4 | 1 |
| Gastrointestinal Disease                               | efflux of iodide                                      | 1.24E-02 | SLC26A4 | 1 |
| Hepatic System Disease                                 | ethynylestradiol hepatocellular cholestasis           | 1.24E-02 | GJB2    | 1 |
| Organismal Injury and Abnormalities                    | ethynylestradiol hepatocellular cholestasis           | 1.24E-02 | GJB2    | 1 |
| Reproductive System Disease                            | formation of mammary lesion                           | 1.24E-02 | MUC1    | 1 |
| Embryonic Development                                  | formation of mammary lesion                           | 1.24E-02 | MUC1    | 1 |
| Organismal Development                                 | formation of renal vesicle                            | 1.24E-02 | WNT4    | 1 |
| Development                                            | formation of renal vesicle                            | 1.24E-02 | WNT4    | 1 |
| Tissue Development Embryonic                           | formation of renal vesicle                            | 1.24E-02 | WNT4    | 1 |
| Development Organismal                                 | formation of rib                                      | 1.24E-02 | SIX1    | 1 |
| Development                                            | formation of rib                                      | 1.24E-02 | SIX1    | 1 |
| Tissue Development                                     | formation of rib                                      | 1.24E-02 | SIX1    | 1 |
| Skeletal and Muscular System Development and Function  | formation of rib                                      | 1.24E-02 | SIX1    | 1 |

|                                               |                                            |          |                            |   |
|-----------------------------------------------|--------------------------------------------|----------|----------------------------|---|
| Connective Tissue Development and Function    | formation of rib                           | 1.24E-02 | SIX1                       | 1 |
| Organ Development                             | formation of rib                           | 1.24E-02 | SIX1                       | 1 |
| Hematological System Development and Function | hematopoiesis of leukemia cell lines       | 1.24E-02 | HIST1H4A (includes others) | 1 |
| Hematopoiesis                                 | hematopoiesis of leukemia cell lines       | 1.24E-02 | HIST1H4A (includes others) | 1 |
| Cellular Development                          | hematopoiesis of leukemia cell lines       | 1.24E-02 | HIST1H4A (includes others) | 1 |
| Dermatological Diseases and Conditions        | hereditary mucosal leukokeratosis          | 1.24E-02 | KRT4                       | 1 |
| Hereditary Disorder                           | hereditary mucosal leukokeratosis          | 1.24E-02 | KRT4                       | 1 |
| Carbohydrate Metabolism                       | hydrolysis of D-glucose                    | 1.24E-02 | TREH                       | 1 |
| Lipid Metabolism                              | import of long chain fatty acid            | 1.24E-02 | ABCD3                      | 1 |
| Small Molecule Biochemistry                   | import of long chain fatty acid            | 1.24E-02 | ABCD3                      | 1 |
| Molecular Transport                           | import of long chain fatty acid            | 1.24E-02 | ABCD3                      | 1 |
| Cell-To-Cell Signaling and Interaction        | induction of plasma cells                  | 1.24E-02 | TNFSF10                    | 1 |
| Hematological System Development and Function | induction of plasma cells                  | 1.24E-02 | TNFSF10                    | 1 |
| Cellular Growth and Proliferation             | induction of plasma cells                  | 1.24E-02 | TNFSF10                    | 1 |
| Humoral Immune Response                       | induction of plasma cells                  | 1.24E-02 | TNFSF10                    | 1 |
| Respiratory Disease                           | infection of lung tissue                   | 1.24E-02 | CXADR                      | 1 |
| Infectious Disease                            | infection of lung tissue                   | 1.24E-02 | CXADR                      | 1 |
| Inflammatory Response                         | inflammation of knee joint                 | 1.24E-02 | F2RL1                      | 1 |
| Cell Death and Survival                       | initiation of cell death of synovial cells | 1.24E-02 | TNFSF10                    | 1 |
| Endocrine System Development and Function     | intracellular pH of acinar gland cells     | 1.24E-02 | SLC9A2                     | 1 |
| Cell Morphology                               | intracellular pH of acinar gland cells     | 1.24E-02 | SLC9A2                     | 1 |
| Cell Death and Survival                       | killing of prostate cancer cell lines      | 1.24E-02 | TNFSF10                    | 1 |
| Infectious Disease                            | measles                                    | 1.24E-02 | TNFSF10                    | 1 |
| Nervous System Development and Function       | memory extinction                          | 1.24E-02 | ADCY8                      | 1 |
| Nervous System Development and Function       | memory suppression                         | 1.24E-02 | ADCY8                      | 1 |
| Small Molecule Biochemistry                   | metabolism of acetate                      | 1.24E-02 | ASPA                       | 1 |
| Cancer                                        | metastasis of pancreatic cancer cell lines | 1.24E-02 | MUC1                       | 1 |

|                                   |                                            |          |                                     |   |
|-----------------------------------|--------------------------------------------|----------|-------------------------------------|---|
| Cell Morphology                   | multinucleation of colon cancer cell lines | 1.24E-02 | UBD                                 | 1 |
| Cellular Compromise               | multinucleation of colon cancer cell lines | 1.24E-02 | UBD                                 | 1 |
| Cell Morphology                   | permeabilization of phospholipid vesicles  | 1.24E-02 | BID                                 | 1 |
| Molecular Transport               | quantity of acetate                        | 1.24E-02 | ASPA                                | 1 |
| Cell Death and Survival           | recovery of retinal rods                   | 1.24E-02 | RGS9BP                              | 1 |
| Visual System                     |                                            |          |                                     |   |
| Development and Function          | recovery of retinal rods                   | 1.24E-02 | RGS9BP                              | 1 |
| Tissue Morphology                 | relaxation of femoral artery               | 1.24E-02 | F2RL1                               | 1 |
| Cardiovascular System             |                                            |          |                                     |   |
| Development and Function          | relaxation of femoral artery               | 1.24E-02 | F2RL1                               | 1 |
| Cellular Function and Maintenance | release of spermatids                      | 1.24E-02 | CADM1                               | 1 |
| Cellular Movement                 | release of spermatids                      | 1.24E-02 | CADM1                               | 1 |
| Reproductive System               |                                            |          |                                     |   |
| Development and Function          | release of spermatids                      | 1.24E-02 | CADM1                               | 1 |
| Small Molecule                    |                                            |          |                                     |   |
| Biochemistry                      | salvage of L-methionine                    | 1.24E-02 | ADI1 (includes EG:104923)           | 1 |
| Amino Acid                        |                                            |          |                                     |   |
| Metabolism                        | salvage of L-methionine                    | 1.24E-02 | ADI1 (includes EG:104923)           | 1 |
| Embryonic                         |                                            |          |                                     |   |
| Development                       | shrinkage of tail bud                      | 1.24E-02 | PHC1                                | 1 |
| Embryonic                         |                                            |          |                                     |   |
| Development                       | size of maxillary shelf                    | 1.24E-02 | CDON                                | 1 |
| Tissue Morphology                 | size of maxillary shelf                    | 1.24E-02 | CDON                                | 1 |
| Lipid Metabolism                  | synthesis of ganglioside GD1a              | 1.24E-02 | ST3GAL5                             | 1 |
| Small Molecule                    |                                            |          |                                     |   |
| Biochemistry                      | synthesis of ganglioside GD1a              | 1.24E-02 | ST3GAL5                             | 1 |
| Lipid Metabolism                  | synthesis of ganglioside GD1b              | 1.24E-02 | ST3GAL5                             | 1 |
| Small Molecule                    |                                            |          |                                     |   |
| Biochemistry                      | synthesis of ganglioside GD1b              | 1.24E-02 | ST3GAL5                             | 1 |
| Lipid Metabolism                  | synthesis of ganglioside GM1               | 1.24E-02 | ST3GAL5                             | 1 |
| Small Molecule                    |                                            |          |                                     |   |
| Biochemistry                      | synthesis of ganglioside GM1               | 1.24E-02 | ST3GAL5                             | 1 |
| Lipid Metabolism                  | synthesis of ganglioside GT1               | 1.24E-02 | ST3GAL5                             | 1 |
| Small Molecule                    |                                            |          |                                     |   |
| Biochemistry                      | synthesis of ganglioside GT1               | 1.24E-02 | ST3GAL5                             | 1 |
| Cell Death and Survival           | toxicity of leukemia cell lines            | 1.24E-02 | TNFSF10                             | 1 |
| Cellular Compromise               | toxicity of leukemia cell lines            | 1.24E-02 | TNFSF10                             | 1 |
| Protein Synthesis                 | hetero-oligomerization of protein          | 1.32E-02 | HR,P2RX6,PRKAA2                     | 3 |
| Embryonic                         |                                            |          |                                     |   |
| Development                       | development of skeletal muscle             | 1.37E-02 | F2RL1,RGS2 (includes EG:19735),SIX1 | 3 |
| Organismal                        |                                            |          |                                     |   |
| Development                       | development of skeletal muscle             | 1.37E-02 | F2RL1,RGS2 (includes EG:19735),SIX1 | 3 |
| Tissue Development                | development of skeletal muscle             | 1.37E-02 | F2RL1,RGS2 (includes EG:19735),SIX1 | 3 |

|                                                       |                                        |          |                                             |   |
|-------------------------------------------------------|----------------------------------------|----------|---------------------------------------------|---|
| Skeletal and Muscular System Development and Function | development of skeletal muscle         | 1.37E-02 | F2RL1,RGS2 (includes EG:19735),SIX1         | 3 |
| Organ Development                                     | development of skeletal muscle         | 1.37E-02 | F2RL1,RGS2 (includes EG:19735),SIX1         | 3 |
| Protein Synthesis                                     | polymerization of protein              | 1.38E-02 | BID,HR,MAPK11,MUC20,P2RX6,PRKAA2            | 6 |
| Organ Morphology                                      | abnormal morphology of stratum corneum | 1.40E-02 | F2RL1,LMO4                                  | 2 |
| Hair and Skin Development and Function                | abnormal morphology of stratum corneum | 1.40E-02 | F2RL1,LMO4                                  | 2 |
| Lipid Metabolism                                      | uptake of lipid                        | 1.41E-02 | CCRN4L,MUC1,SLC27A2,TNFSF10                 | 4 |
| Small Molecule Biochemistry                           | uptake of lipid                        | 1.41E-02 | CCRN4L,MUC1,SLC27A2,TNFSF10                 | 4 |
| Molecular Transport                                   | uptake of lipid                        | 1.41E-02 | CCRN4L,MUC1,SLC27A2,TNFSF10                 | 4 |
| Energy Production                                     | oxidation of fatty acid                | 1.48E-02 | ABCD3,BID,PRKAA2,SLC27A2                    | 4 |
| Lipid Metabolism                                      | oxidation of fatty acid                | 1.48E-02 | ABCD3,BID,PRKAA2,SLC27A2                    | 4 |
| Small Molecule Biochemistry                           | oxidation of fatty acid                | 1.48E-02 | ABCD3,BID,PRKAA2,SLC27A2                    | 4 |
| Cellular Compromise                                   | degradation of mitochondria            | 1.50E-02 | BID,TNFSF10                                 | 2 |
| Cardiovascular System Development and Function        | abnormal morphology of vasculature     | 1.51E-02 | CXADR,FZD5,GJB2,RGS2 (includes EG:19735)    | 4 |
| Organismal Injury and Abnormalities                   | endotoxin shock response               | 1.51E-02 | BID,F2RL1,IRAK4                             | 3 |
| Hematological Disease                                 | endotoxin shock response               | 1.51E-02 | BID,F2RL1,IRAK4                             | 3 |
| Infectious Disease                                    | endotoxin shock response               | 1.51E-02 | BID,F2RL1,IRAK4                             | 3 |
| Hematopoiesis                                         | maturation of leukocytes               | 1.53E-02 | ELF3,F2RL1,IRAK4,PHC1,TNFSF10               | 5 |
| Cellular Development                                  | maturation of leukocytes               | 1.53E-02 | ELF3,F2RL1,IRAK4,PHC1,TNFSF10               | 5 |
| Organ Morphology                                      | morphology of hair                     | 1.56E-02 | DNASE1L2,F2RL1,LIPH                         | 3 |
| Hair and Skin Development and Function                | morphology of hair                     | 1.56E-02 | DNASE1L2,F2RL1,LIPH                         | 3 |
| Lipid Metabolism                                      | absorption of cholesterol              | 1.59E-02 | MUC1,TNFSF10                                | 2 |
| Small Molecule Biochemistry                           | absorption of cholesterol              | 1.59E-02 | MUC1,TNFSF10                                | 2 |
| Molecular Transport                                   | absorption of cholesterol              | 1.59E-02 | MUC1,TNFSF10                                | 2 |
| Cell Death and Survival                               | apoptosis of lung cells                | 1.59E-02 | BID,TNFSF10                                 | 2 |
| Molecular Transport                                   | transport of cation                    | 1.64E-02 | ANK1,KCNK5,P2RX6,PDZK1,SLC39A4,SLC9A2,TRPV6 | 7 |
| Dermatological Diseases and Conditions                | alopecia                               | 1.66E-02 | HR,ITGB6,TRPV6                              | 3 |
| Embryonic Development                                 | spermiogenesis                         | 1.66E-02 | ACRBP,CADM1,NME5                            | 3 |
| Organismal Development                                | spermiogenesis                         | 1.66E-02 | ACRBP,CADM1,NME5                            | 3 |
| Tissue Development                                    | spermiogenesis                         | 1.66E-02 | ACRBP,CADM1,NME5                            | 3 |
| Organ Development                                     | spermiogenesis                         | 1.66E-02 | ACRBP,CADM1,NME5                            | 3 |

|                                                                  |                                                     |          |                                                                                                                                                                             |    |
|------------------------------------------------------------------|-----------------------------------------------------|----------|-----------------------------------------------------------------------------------------------------------------------------------------------------------------------------|----|
| Cellular Development                                             | spermiogenesis                                      | 1.66E-02 | ACRBP,CADM1,NME5                                                                                                                                                            | 3  |
| Reproductive System<br>Development and<br>Function               | spermiogenesis                                      | 1.66E-02 | ACRBP,CADM1,NME5                                                                                                                                                            | 3  |
| Cell Signaling                                                   | MAPKKK cascade                                      | 1.72E-02 | CDON,DUSP4,MAPK11,PPM1L                                                                                                                                                     | 4  |
| Gene Expression                                                  | expression of RNA                                   | 1.72E-02 | BARX2,BID,CCRN4L,CDON,DUSP4,ELF3,F2RL1,FZD5,<br>HDAC9,HR,IRAK4,IRF2,LMO4,MAPK11,NFE2L3,POU6<br>F1,PPM1L,PRKAR2B,RASGRF1,RGNEF,RGS2 (includes<br>EG:19735),SIX1,TNFSF10,WNT4 | 24 |
| Cellular Development                                             | maturation of cells                                 | 1.78E-02 | CADM1,ELF3,F2RL1,FZD5,IRAK4,PHC1,TNFSF10                                                                                                                                    | 7  |
| Inflammatory<br>Response                                         | cytotoxic T lymphocyte response                     | 1.79E-02 | IRAK4,MUC1                                                                                                                                                                  | 2  |
| Skeletal and Muscular<br>System Development<br>and Function      | fusion of vertebrae                                 | 1.79E-02 | LMO4,PHC1                                                                                                                                                                   | 2  |
| Hematological System<br>Development and<br>Function              | differentiation of blood cells                      | 1.83E-02 | ELF3,FZD5,HDAC9,HIST1H4A (includes<br>others),IFNGR2,IRF2,PHC1,TFRC,TNFSF10,UBD,WNT<br>4                                                                                    | 11 |
| Cellular Development                                             | differentiation of blood cells                      | 1.83E-02 | ELF3,FZD5,HDAC9,HIST1H4A (includes<br>others),IFNGR2,IRF2,PHC1,TFRC,TNFSF10,UBD,WNT<br>4                                                                                    | 11 |
| Gastrointestinal<br>Disease                                      | colon carcinoma                                     | 1.83E-02 | ABCD3,MUC1,PPM1L,TFRC,TNFSF10                                                                                                                                               | 5  |
| Cancer                                                           | colon carcinoma                                     | 1.83E-02 | ABCD3,MUC1,PPM1L,TFRC,TNFSF10                                                                                                                                               | 5  |
| Organ Morphology                                                 | abnormal morphology of Reissner's<br>membrane       | 1.86E-02 | SLC26A4                                                                                                                                                                     | 1  |
| Auditory and<br>Vestibular System<br>Development and<br>Function | abnormal morphology of Reissner's<br>membrane       | 1.86E-02 | SLC26A4                                                                                                                                                                     | 1  |
| Organ Morphology                                                 | abnormal morphology of spiral limbus                | 1.86E-02 | SLC26A4                                                                                                                                                                     | 1  |
| Auditory and<br>Vestibular System<br>Development and<br>Function | abnormal morphology of spiral limbus                | 1.86E-02 | SLC26A4                                                                                                                                                                     | 1  |
| Embryonic<br>Development                                         | abnormal morphology of strial<br>intermediate cells | 1.86E-02 | SLC26A4                                                                                                                                                                     | 1  |
| Cell Morphology                                                  | abnormal morphology of strial<br>intermediate cells | 1.86E-02 | SLC26A4                                                                                                                                                                     | 1  |
| Cell-To-Cell Signaling<br>and Interaction                        | afterhyperpolarization of pyramidal<br>neurons      | 1.86E-02 | LMO4                                                                                                                                                                        | 1  |
| Nervous System<br>Development and<br>Function                    | afterhyperpolarization of pyramidal<br>neurons      | 1.86E-02 | LMO4                                                                                                                                                                        | 1  |
| Cell Death and Survival                                          | apoptosis of adipoblasts                            | 1.86E-02 | TNFSF10                                                                                                                                                                     | 1  |
| Cell Cycle                                                       | arrest in mitosis of carcinoma cell lines           | 1.86E-02 | ACRBP                                                                                                                                                                       | 1  |
| Cellular Function and<br>Maintenance                             | autophagy of epithelial cells                       | 1.86E-02 | TNFSF10                                                                                                                                                                     | 1  |
| Cell Morphology                                                  | autophagy of epithelial cells                       | 1.86E-02 | TNFSF10                                                                                                                                                                     | 1  |

|                                                  |                                                |          |                                                 |   |
|--------------------------------------------------|------------------------------------------------|----------|-------------------------------------------------|---|
| Dermatological Diseases and Conditions           | autosomal recessive hypotrichosis              | 1.86E-02 | LIPH                                            | 1 |
| Hereditary Disorder                              | autosomal recessive hypotrichosis              | 1.86E-02 | LIPH                                            | 1 |
| Behavior                                         | barbering behavior                             | 1.86E-02 | CHST8                                           | 1 |
| Gastrointestinal Disease                         | bile duct obstruction                          | 1.86E-02 | GJB2                                            | 1 |
| Hepatic System Disease                           | bile duct obstruction                          | 1.86E-02 | GJB2                                            | 1 |
| Tissue Development                               | cell-cell contact of nervous tissue cell lines | 1.86E-02 | CADM1                                           | 1 |
| Cell-To-Cell Signaling and Interaction           | cell-cell contact of nervous tissue cell lines | 1.86E-02 | CADM1                                           | 1 |
| Nervous System Development and Function          | cell-cell contact of nervous tissue cell lines | 1.86E-02 | CADM1                                           | 1 |
| Molecular Transport Small Molecule               | concentration of bicarbonate                   | 1.86E-02 | KCNK5                                           | 1 |
| Biochemistry                                     | concentration of hormone                       | 1.86E-02 | CHST8,FAM3B,NAPEPLD,PRKAA2,PRKAR2B,RASGRF1,WNT4 | 7 |
| Endocrine System Development and Function        | concentration of hormone                       | 1.86E-02 | CHST8,FAM3B,NAPEPLD,PRKAA2,PRKAR2B,RASGRF1,WNT4 | 7 |
| Molecular Transport                              | concentration of hormone                       | 1.86E-02 | CHST8,FAM3B,NAPEPLD,PRKAA2,PRKAR2B,RASGRF1,WNT4 | 7 |
| Cellular Compromise                              | degeneration of type II fibrocyte              | 1.86E-02 | SLC26A4                                         | 1 |
| Cell-To-Cell Signaling and Interaction           | depotentialization of synapse                  | 1.86E-02 | ADCY8                                           | 1 |
| Nervous System Development and Function          | depotentialization of synapse                  | 1.86E-02 | ADCY8                                           | 1 |
| Organismal Development                           | development of capillary plexus                | 1.86E-02 | FZD5                                            | 1 |
| Cardiovascular System Development and Function   | development of capillary plexus                | 1.86E-02 | FZD5                                            | 1 |
| Embryonic Development                            | development of tympanic ring                   | 1.86E-02 | PHC1                                            | 1 |
| Organismal Development                           | development of tympanic ring                   | 1.86E-02 | PHC1                                            | 1 |
| Tissue Development Embryonic                     | development of tympanic ring                   | 1.86E-02 | PHC1                                            | 1 |
| Development                                      | development of vestibule                       | 1.86E-02 | SIX1                                            | 1 |
| Organismal Development                           | development of vestibule                       | 1.86E-02 | SIX1                                            | 1 |
| Tissue Development                               | development of vestibule                       | 1.86E-02 | SIX1                                            | 1 |
| Organ Development Auditory and Vestibular System | development of vestibule                       | 1.86E-02 | SIX1                                            | 1 |
| Development and Function                         | development of vestibule                       | 1.86E-02 | SIX1                                            | 1 |



|                                    |                                              |          |                           |   |
|------------------------------------|----------------------------------------------|----------|---------------------------|---|
| Auditory Disease                   | dilatation of the vestibular aqueduct        | 1.86E-02 | SLC26A4                   | 1 |
| Hereditary Disorder                | dilatation of the vestibular aqueduct        | 1.86E-02 | SLC26A4                   | 1 |
| Neurological Disease               | dilatation of the vestibular aqueduct        | 1.86E-02 | SLC26A4                   | 1 |
| Cellular Compromise                | disorganization of myofiber                  | 1.86E-02 | SIX1                      | 1 |
| Cellular Assembly and Organization | dissociation of mitochondria                 | 1.86E-02 | BID                       | 1 |
| Cell Signaling                     | hepatocyte growth factor receptor signaling  | 1.86E-02 | MUC20                     | 1 |
| Cellular Function and Maintenance  | hyperpolarization of POMC neurons            | 1.86E-02 | PRKAA2                    | 1 |
| Developmental Disorder             | hypoplasia of parathyroid gland              | 1.86E-02 | PHC1                      | 1 |
| Endocrine System Disorders         | hypoplasia of parathyroid gland              | 1.86E-02 | PHC1                      | 1 |
| Developmental Disorder             | hypoplasia of thyroid gland                  | 1.86E-02 | PHC1                      | 1 |
| Endocrine System Disorders         | hypoplasia of thyroid gland                  | 1.86E-02 | PHC1                      | 1 |
| Neurological Disease               | injury of axons                              | 1.86E-02 | F2RL1                     | 1 |
| Cell Death and Survival            | killing of epithelial cells                  | 1.86E-02 | TNFSF10                   | 1 |
| Cell Death and Survival            | killing of hepatoma cell lines               | 1.86E-02 | TNFSF10                   | 1 |
| Organ Morphology                   | lack of Langerhans cells                     | 1.86E-02 | ITGB6                     | 1 |
| Cell Morphology                    | lack of Langerhans cells                     | 1.86E-02 | ITGB6                     | 1 |
| Inflammatory Response              | lack of Langerhans cells                     | 1.86E-02 | ITGB6                     | 1 |
| Cell Death and Survival            | lysis of dendritic cells                     | 1.86E-02 | TNFSF10                   | 1 |
| Lipid Metabolism                   | metabolism of ketone body                    | 1.86E-02 | OXCT1                     | 1 |
| Small Molecule                     |                                              |          |                           |   |
| Biochemistry                       | metabolism of ketone body                    | 1.86E-02 | OXCT1                     | 1 |
| Cellular Movement                  | mobility of lung cancer cell lines           | 1.86E-02 | CADM1                     | 1 |
|                                    | morphology of keratinocyte cancer cell lines | 1.86E-02 | TRPV6                     | 1 |
| Cell Morphology                    |                                              |          |                           |   |
| Cellular Assembly and Organization | opening of cellular membrane                 | 1.86E-02 | BID                       | 1 |
| Embryonic Development              | quantity of labyrinthine trophoblast cells   | 1.86E-02 | KRT19 (includes EG:16669) | 1 |
|                                    | quantity of labyrinthine trophoblast cells   | 1.86E-02 | KRT19 (includes EG:16669) | 1 |
| Tissue Morphology                  | quantity of labyrinthine trophoblast cells   | 1.86E-02 | KRT19 (includes EG:16669) | 1 |
| Cellular Growth and Proliferation  | quantity of labyrinthine trophoblast cells   | 1.86E-02 | KRT19 (includes EG:16669) | 1 |
|                                    | quantity of labyrinthine trophoblast cells   | 1.86E-02 | KRT19 (includes EG:16669) | 1 |
| Cellular Development               | regulation of vascular smooth muscle cells   | 1.86E-02 | RGNEF                     | 1 |
| Cellular Function and Maintenance  |                                              |          |                           |   |
| Cellular Response to Therapeutics  | sensitivity of tumor cells                   | 1.86E-02 | TNFSF10                   | 1 |
| Small Molecule                     |                                              |          |                           |   |
| Biochemistry                       | sulfation of dopamine                        | 1.86E-02 | SULT1C2                   | 1 |

|                                        |                                        |          |                                               |   |
|----------------------------------------|----------------------------------------|----------|-----------------------------------------------|---|
| Cell-To-Cell Signaling and Interaction | sulfation of dopamine                  | 1.86E-02 | SULT1C2                                       | 1 |
| Drug Metabolism                        | sulfation of dopamine                  | 1.86E-02 | SULT1C2                                       | 1 |
| Lipid Metabolism                       | synthesis of anandamide                | 1.86E-02 | NAPEPLD                                       | 1 |
| Small Molecule                         |                                        |          |                                               |   |
| Biochemistry                           | synthesis of anandamide                | 1.86E-02 | NAPEPLD                                       | 1 |
| Endocrine System                       |                                        |          |                                               |   |
| Development and Function               | synthesis of anandamide                | 1.86E-02 | NAPEPLD                                       | 1 |
| Molecular Transport                    | transport of iodine                    | 1.86E-02 | SLC26A4                                       | 1 |
| Small Molecule                         |                                        |          |                                               |   |
| Biochemistry                           | transport of uric acid                 | 1.86E-02 | PDZK1                                         | 1 |
| Nucleic Acid                           |                                        |          |                                               |   |
| Metabolism                             | transport of uric acid                 | 1.86E-02 | PDZK1                                         | 1 |
| Molecular Transport                    | transport of uric acid                 | 1.86E-02 | PDZK1                                         | 1 |
|                                        |                                        |          |                                               |   |
| Cancer                                 | tumorigenesis of B cell lymphoma cells | 1.86E-02 | EMP2                                          | 1 |
|                                        |                                        |          |                                               |   |
| Hematological Disease                  | tumorigenesis of B cell lymphoma cells | 1.86E-02 | EMP2                                          | 1 |
| Immunological                          |                                        |          |                                               |   |
| Disease                                | tumorigenesis of B cell lymphoma cells | 1.86E-02 | EMP2                                          | 1 |
| Gastrointestinal                       |                                        |          |                                               |   |
| Disease                                | tumorigenesis of colon carcinoma       | 1.86E-02 | MUC1                                          | 1 |
| Cancer                                 | tumorigenesis of colon carcinoma       | 1.86E-02 | MUC1                                          | 1 |
| Embryonic                              |                                        |          |                                               |   |
| Development                            | vasculogenesis of placenta             | 1.86E-02 | FZD5                                          | 1 |
| Organismal                             |                                        |          |                                               |   |
| Development                            | vasculogenesis of placenta             | 1.86E-02 | FZD5                                          | 1 |
|                                        |                                        |          |                                               |   |
| Tissue Development                     | vasculogenesis of placenta             | 1.86E-02 | FZD5                                          | 1 |
|                                        |                                        |          |                                               |   |
| Organ Development                      | vasculogenesis of placenta             | 1.86E-02 | FZD5                                          | 1 |
|                                        |                                        |          |                                               |   |
| Cardiovascular System                  |                                        |          |                                               |   |
| Development and Function               | vasculogenesis of placenta             | 1.86E-02 | FZD5                                          | 1 |
|                                        |                                        |          |                                               |   |
| Reproductive System                    |                                        |          |                                               |   |
| Development and Function               | vasculogenesis of placenta             | 1.86E-02 | FZD5                                          | 1 |
| Small Molecule                         |                                        |          |                                               |   |
| Biochemistry                           | catabolism of L-amino acid             | 1.90E-02 | ASPA,HAL                                      | 2 |
| Amino Acid                             |                                        |          |                                               |   |
| Metabolism                             | catabolism of L-amino acid             | 1.90E-02 | ASPA,HAL                                      | 2 |
|                                        |                                        |          |                                               |   |
| Hematological System                   |                                        |          |                                               |   |
| Development and Function               | differentiation of lymphocytes         | 1.91E-02 | ELF3,FZD5,HDAC9,IFNGR2,IRF2,PHC1,TNFSF10,WNT4 | 8 |
|                                        |                                        |          |                                               |   |
| Hematopoiesis                          | differentiation of lymphocytes         | 1.91E-02 | ELF3,FZD5,HDAC9,IFNGR2,IRF2,PHC1,TNFSF10,WNT4 | 8 |
|                                        |                                        |          |                                               |   |
| Cellular Development                   | differentiation of lymphocytes         | 1.91E-02 | ELF3,FZD5,HDAC9,IFNGR2,IRF2,PHC1,TNFSF10,WNT4 | 8 |
| Free Radical                           |                                        |          |                                               |   |
| Scavenging                             | synthesis of reactive oxygen species   | 1.92E-02 | BID,F2RL1,MUC1,NFE2L3,NOXA1,PRKAA2,TFRC       | 7 |
|                                        |                                        |          |                                               |   |
| Inflammatory Disease                   | Encephalitis                           | 1.95E-02 | DUSP10,F2RL1,IRAK4,MAPK11,TNFSF10             | 5 |

|                                                                          |                                            |          |                                                                                                                                                    |    |
|--------------------------------------------------------------------------|--------------------------------------------|----------|----------------------------------------------------------------------------------------------------------------------------------------------------|----|
| Neurological Disease                                                     | Encephalitis                               | 1.95E-02 | DUSP10,F2RL1,IRAK4,MAPK11,TNFSF10                                                                                                                  | 5  |
| Organ Morphology                                                         | lack of kidney                             | 2.01E-02 | SIX1,WNT4                                                                                                                                          | 2  |
| Renal and Urological System Development and Function                     | lack of kidney                             | 2.01E-02 | SIX1,WNT4                                                                                                                                          | 2  |
| Lipid Metabolism Small Molecule                                          | release of prostaglandin E2                | 2.01E-02 | F2RL1,IRF2                                                                                                                                         | 2  |
| Biochemistry                                                             | release of prostaglandin E2                | 2.01E-02 | F2RL1,IRF2                                                                                                                                         | 2  |
| Molecular Transport                                                      | release of prostaglandin E2                | 2.01E-02 | F2RL1,IRF2                                                                                                                                         | 2  |
| Drug Metabolism                                                          | release of prostaglandin E2                | 2.01E-02 | F2RL1,IRF2                                                                                                                                         | 2  |
| Cell Death and Survival                                                  | cell death of connective tissue cells      | 2.06E-02 | BID,DUSP4,EMP2,MAPK11,MUC1,PGLYRP1,PRKAR2B, TNFSF10,UBD                                                                                            | 9  |
| Immunological Disease                                                    | systemic autoimmune syndrome               | 2.08E-02 | ADCY8,CHST8,F2RL1,FZD5,GABRP,HIST1H3A (includes others),HIST1H4A (includes others),HIST2H2BE (includes others),IFNGR2,PGLYRP1,RASGRF1,TFRC,TNFSF10 | 13 |
| Cell Death and Survival                                                  | cell death of vascular endothelial cells   | 2.10E-02 | F2RL1,MAPK11,TNFSF10                                                                                                                               | 3  |
| Cell Death and Survival Cellular Function and Maintenance                | cytolysis of tumor cell lines              | 2.12E-02 | MUC1,TNFSF10                                                                                                                                       | 2  |
| Cell Morphology                                                          | pH of cells                                | 2.12E-02 | SLC26A4,SLC9A2                                                                                                                                     | 2  |
| Gastrointestinal Disease                                                 | pH of cells                                | 2.12E-02 | SLC26A4,SLC9A2                                                                                                                                     | 2  |
| Hepatic System Disease                                                   | cholestasis                                | 2.16E-02 | GJB2,MGST3,TNFSF10                                                                                                                                 | 3  |
| Hepatic System Disease                                                   | cholestasis                                | 2.16E-02 | GJB2,MGST3,TNFSF10                                                                                                                                 | 3  |
| Cell Death and Survival                                                  | cell death of fibroblasts                  | 2.27E-02 | BID,MAPK11,PRKAR2B,TNFSF10,UBD                                                                                                                     | 5  |
| Infectious Disease                                                       | Bacterial Infection                        | 2.29E-02 | BID,F2RL1,GABRP,IFNGR2,IRAK4,TNFSF10,UBD                                                                                                           | 7  |
| Hereditary Disorder                                                      | recessive disease                          | 2.45E-02 | ABCD3,GJB2,HAL,LIPH,SLC26A4,ST3GAL5                                                                                                                | 6  |
| Tissue Morphology                                                        | quantity of dendritic cells                | 2.46E-02 | F2RL1,IRF2,ITGB6                                                                                                                                   | 3  |
| Hematological System Development and Function                            | quantity of dendritic cells                | 2.46E-02 | F2RL1,IRF2,ITGB6                                                                                                                                   | 3  |
| Inflammatory Response                                                    | quantity of dendritic cells                | 2.46E-02 | F2RL1,IRF2,ITGB6                                                                                                                                   | 3  |
| Organ Morphology Auditory and Vestibular System Development and Function | abnormal morphology of endolymphatic sac   | 2.47E-02 | SLC26A4                                                                                                                                            | 1  |
| Organ Morphology Auditory and Vestibular System Development and Function | abnormal morphology of endolymphatic sac   | 2.47E-02 | SLC26A4                                                                                                                                            | 1  |
| Organ Morphology Hair and Skin Development and Function                  | abnormal morphology of hair cuticle        | 2.47E-02 | LIPH                                                                                                                                               | 1  |
| Organ Morphology Hair and Skin Development and Function                  | abnormal morphology of hair cuticle        | 2.47E-02 | LIPH                                                                                                                                               | 1  |
| Organ Morphology                                                         | abnormal morphology of inguinal lymph node | 2.47E-02 | IRF2                                                                                                                                               | 1  |
| Tissue Morphology                                                        | abnormal morphology of inguinal lymph node | 2.47E-02 | IRF2                                                                                                                                               | 1  |

|                                                                 |                                                    |          |                          |   |
|-----------------------------------------------------------------|----------------------------------------------------|----------|--------------------------|---|
| Lymphoid Tissue<br>Structure and<br>Development                 | abnormal morphology of inguinal<br>lymph node      | 2.47E-02 | IRF2                     | 1 |
| Organ Morphology                                                | abnormal morphology of myocardial<br>cuff          | 2.47E-02 | CXADR                    | 1 |
| Cardiovascular System<br>Development and<br>Function            | abnormal morphology of myocardial<br>cuff          | 2.47E-02 | CXADR                    | 1 |
| Organ Morphology<br>Auditory and<br>Vestibular System           | abnormal morphology of otolithic<br>membrane       | 2.47E-02 | SLC26A4                  | 1 |
| Development and<br>Function                                     | abnormal morphology of otolithic<br>membrane       | 2.47E-02 | SLC26A4                  | 1 |
| Organ Morphology                                                | abnormal morphology of sperm                       | 2.47E-02 | CADM1                    | 1 |
| Cell Morphology                                                 | abnormal morphology of sperm                       | 2.47E-02 | CADM1                    | 1 |
| Reproductive System<br>Development and<br>Function              | abnormal morphology of sperm                       | 2.47E-02 | CADM1                    | 1 |
| Cell-To-Cell Signaling<br>and Interaction<br>Respiratory System | activation of airway epithelial cells              | 2.47E-02 | F2RL1                    | 1 |
| Development and<br>Function                                     | activation of airway epithelial cells              | 2.47E-02 | F2RL1                    | 1 |
| Cell-To-Cell Signaling<br>and Interaction                       | activation of carcinoma cell lines                 | 2.47E-02 | CADM1                    | 1 |
| Cell-To-Cell Signaling<br>and Interaction                       | activation of lung cancer cell lines               | 2.47E-02 | CADM1                    | 1 |
| Cellular Assembly and<br>Organization                           | aggregation of pigment granules                    | 2.47E-02 | RGS2 (includes EG:19735) | 1 |
| Cell Death and Survival                                         | apoptosis of PrEC cells                            | 2.47E-02 | TNFSF10                  | 1 |
| Cell Death and Survival                                         | apoptosis of acute myeloid leukemia<br>blast cells | 2.47E-02 | MUC1                     | 1 |
| Tumor Morphology                                                | apoptosis of acute myeloid leukemia<br>blast cells | 2.47E-02 | MUC1                     | 1 |
| Cell Death and Survival                                         | apoptosis of adenocarcinoma cell lines             | 2.47E-02 | TNFSF10                  | 1 |
| Cell Death and Survival                                         | apoptosis of follicular B-cell lymphoma<br>cells   | 2.47E-02 | TNFSF10                  | 1 |
| Tumor Morphology                                                | apoptosis of follicular B-cell lymphoma<br>cells   | 2.47E-02 | TNFSF10                  | 1 |
| Cell Death and Survival                                         | apoptosis of multiple myeloma cells                | 2.47E-02 | TNFSF10                  | 1 |
| Tumor Morphology                                                | apoptosis of multiple myeloma cells                | 2.47E-02 | TNFSF10                  | 1 |
| Cell Death and Survival<br>Small Molecule                       | apoptosis of spermatids                            | 2.47E-02 | CADM1                    | 1 |
| Biochemistry<br>Amino Acid                                      | catabolism of L-aspartic acid                      | 2.47E-02 | ASPA                     | 1 |
| Metabolism                                                      | catabolism of L-aspartic acid                      | 2.47E-02 | ASPA                     | 1 |
| Lipid Metabolism                                                | catabolism of glycerophospholipid                  | 2.47E-02 | PLA2G4B                  | 1 |

|                         |                                             |          |                          |   |
|-------------------------|---------------------------------------------|----------|--------------------------|---|
| Small Molecule          |                                             |          |                          |   |
| Biochemistry            | catabolism of glycerophospholipid           | 2.47E-02 | PLA2G4B                  | 1 |
| Carbohydrate            |                                             |          |                          |   |
| Metabolism              | catabolism of glycerophospholipid           | 2.47E-02 | PLA2G4B                  | 1 |
| Cell Death and Survival | cell viability of mesothelioma cell lines   | 2.47E-02 | TNFSF10                  | 1 |
| Cell Death and Survival | cell viability of sperm                     | 2.47E-02 | CADM1                    | 1 |
| Reproductive System     |                                             |          |                          |   |
| Development and         |                                             |          |                          |   |
| Function                | cell viability of sperm                     | 2.47E-02 | CADM1                    | 1 |
| Respiratory Disease     | constriction of airway                      | 2.47E-02 | F2RL1                    | 1 |
| Lipid Metabolism        | conversion of lysophosphatidic acid         | 2.47E-02 | LIPH                     | 1 |
| Small Molecule          |                                             |          |                          |   |
| Biochemistry            | conversion of lysophosphatidic acid         | 2.47E-02 | LIPH                     | 1 |
| Carbohydrate            |                                             |          |                          |   |
| Metabolism              | conversion of lysophosphatidic acid         | 2.47E-02 | LIPH                     | 1 |
| Cell Death and Survival | cytolysis of prostate cancer cell lines     | 2.47E-02 | MUC1                     | 1 |
| Cell Death and Survival | cytotoxicity of monocytes                   | 2.47E-02 | TNFSF10                  | 1 |
| Auditory Disease        | degeneration of stria vascularis of cochlea | 2.47E-02 | SLC26A4                  | 1 |
| Cancer                  | delay in formation of mammary tumor         | 2.47E-02 | MUC1                     | 1 |
| Reproductive System     |                                             |          |                          |   |
| Disease                 | delay in formation of mammary tumor         | 2.47E-02 | MUC1                     | 1 |
| Embryonic               |                                             |          |                          |   |
| Development             | development of cervical vertebra            | 2.47E-02 | LMO4                     | 1 |
| Organismal              |                                             |          |                          |   |
| Development             | development of cervical vertebra            | 2.47E-02 | LMO4                     | 1 |
| Tissue Development      | development of cervical vertebra            | 2.47E-02 | LMO4                     | 1 |
| Skeletal and Muscular   |                                             |          |                          |   |
| System Development      |                                             |          |                          |   |
| and Function            | development of cervical vertebra            | 2.47E-02 | LMO4                     | 1 |
| Connective Tissue       |                                             |          |                          |   |
| Development and         |                                             |          |                          |   |
| Function                | development of cervical vertebra            | 2.47E-02 | LMO4                     | 1 |
| Organ Development       | development of cervical vertebra            | 2.47E-02 | LMO4                     | 1 |
| Cellular Development    | differentiation of mammary epithelial cells | 2.47E-02 | LMO4                     | 1 |
| Reproductive System     |                                             |          |                          |   |
| Development and         |                                             |          |                          |   |
| Function                | differentiation of mammary epithelial cells | 2.47E-02 | LMO4                     | 1 |
| Embryonic               |                                             |          |                          |   |
| Development             | formation of skeletal muscle                | 2.47E-02 | RGS2 (includes EG:19735) | 1 |
| Organismal              |                                             |          |                          |   |
| Development             | formation of skeletal muscle                | 2.47E-02 | RGS2 (includes EG:19735) | 1 |
| Tissue Development      | formation of skeletal muscle                | 2.47E-02 | RGS2 (includes EG:19735) | 1 |

|                                                       |                                                |          |                          |   |
|-------------------------------------------------------|------------------------------------------------|----------|--------------------------|---|
| Skeletal and Muscular System Development and Function | formation of skeletal muscle                   | 2.47E-02 | RGS2 (includes EG:19735) | 1 |
| Organ Development                                     | formation of skeletal muscle                   | 2.47E-02 | RGS2 (includes EG:19735) | 1 |
| Organismal Injury and Abnormalities                   | hereditary spherocytosis                       | 2.47E-02 | ANK1                     | 1 |
| Developmental Disorder                                | hereditary spherocytosis                       | 2.47E-02 | ANK1                     | 1 |
| Hematological Disease                                 | hereditary spherocytosis                       | 2.47E-02 | ANK1                     | 1 |
| Hereditary Disorder                                   | hereditary spherocytosis                       | 2.47E-02 | ANK1                     | 1 |
| Small Molecule Biochemistry                           | hydrolysis of ADP                              | 2.47E-02 | ABCD3                    | 1 |
| DNA Replication, Recombination, and Repair            | hydrolysis of ADP                              | 2.47E-02 | ABCD3                    | 1 |
| Nucleic Acid Metabolism                               | hydrolysis of ADP                              | 2.47E-02 | ABCD3                    | 1 |
| Cardiovascular Disease                                | hypertrophy of aorta                           | 2.47E-02 | RGS2 (includes EG:19735) | 1 |
| Developmental Disorder                                | hypertrophy of aorta                           | 2.47E-02 | RGS2 (includes EG:19735) | 1 |
| Gastrointestinal Disease                              | hypochlorhydria                                | 2.47E-02 | SLC9A2                   | 1 |
| Molecular Transport                                   | import of heavy metal                          | 2.47E-02 | TFRC                     | 1 |
| Organismal Development                                | lack of maxillary incisor                      | 2.47E-02 | CDON                     | 1 |
| Digestive System Development and Function             | lack of maxillary incisor                      | 2.47E-02 | CDON                     | 1 |
| Embryonic Development                                 | lack of mullerian duct                         | 2.47E-02 | WNT4                     | 1 |
| Tissue Morphology                                     | lack of mullerian duct                         | 2.47E-02 | WNT4                     | 1 |
| Gastrointestinal Disease                              | lipopolysaccharide hepatocellular cholestasis  | 2.47E-02 | GJB2                     | 1 |
| Hepatic System Disease                                | lipopolysaccharide hepatocellular cholestasis  | 2.47E-02 | GJB2                     | 1 |
| Cell-To-Cell Signaling and Interaction                | long term depression of hippocampal CA1 region | 2.47E-02 | ADCY8                    | 1 |
| Nervous System Development and Function               | long term depression of hippocampal CA1 region | 2.47E-02 | ADCY8                    | 1 |
| Cellular Development                                  | maturation of sperm                            | 2.47E-02 | CADM1                    | 1 |
| Reproductive System Development and Function          | maturation of sperm                            | 2.47E-02 | CADM1                    | 1 |
| Hematological System Development and Function         | pH of blood                                    | 2.47E-02 | KCNK5                    | 1 |
| Organ Morphology                                      | permeability of colon                          | 2.47E-02 | F2RL1                    | 1 |

|                                                       |                                                      |          |                                 |   |
|-------------------------------------------------------|------------------------------------------------------|----------|---------------------------------|---|
| Digestive System Development and Function             | permeability of colon                                | 2.47E-02 | F2RL1                           | 1 |
| Organismal Injury and Abnormalities                   | reticulocytosis                                      | 2.47E-02 | PRKAA2                          | 1 |
| Hematological Disease                                 | reticulocytosis                                      | 2.47E-02 | PRKAA2                          | 1 |
| Cellular Response to Therapeutics                     | sensitivity of colon cancer cell lines               | 2.47E-02 | TNFSF10                         | 1 |
| Organ Morphology                                      | size of submandibular gland                          | 2.47E-02 | SIX1                            | 1 |
| Digestive System Development and Function             | size of submandibular gland                          | 2.47E-02 | SIX1                            | 1 |
| Lipid Metabolism                                      | synthesis of lactosylceramide                        | 2.47E-02 | ST3GAL5                         | 1 |
| Small Molecule Biochemistry                           | synthesis of lactosylceramide                        | 2.47E-02 | ST3GAL5                         | 1 |
| Cellular Development                                  | transdifferentiation of pancreatic cancer cell lines | 2.47E-02 | MUC1                            | 1 |
| Molecular Transport                                   | transport of iodide                                  | 2.47E-02 | SLC26A4                         | 1 |
| Organismal Development                                | vasodilation of mesenteric resistance artery         | 2.47E-02 | RGS2 (includes EG:19735)        | 1 |
| Tissue Morphology                                     | vasodilation of mesenteric resistance artery         | 2.47E-02 | RGS2 (includes EG:19735)        | 1 |
| Cardiovascular System Development and Function        | vasodilation of mesenteric resistance artery         | 2.47E-02 | RGS2 (includes EG:19735)        | 1 |
| Protein Synthesis                                     | homo-oligomerization of protein                      | 2.53E-02 | BID,MUC20,P2RX6                 | 3 |
| Organismal Injury and Abnormalities                   | edema of lung                                        | 2.58E-02 | F2RL1,ITGB6                     | 2 |
| Respiratory Disease                                   | edema of lung                                        | 2.58E-02 | F2RL1,ITGB6                     | 2 |
| Cardiovascular Disease                                | cerebrovascular dysfunction                          | 2.62E-02 | ADCY8,GABRP,HDAC9,RASGRF1       | 4 |
| Neurological Disease                                  | cerebrovascular dysfunction                          | 2.62E-02 | ADCY8,GABRP,HDAC9,RASGRF1       | 4 |
| Protein Synthesis                                     | quantity of IgG2a                                    | 2.66E-02 | DUSP4,IRF2,TNFSF10              | 3 |
| Humoral Immune Response                               | quantity of IgG2a                                    | 2.66E-02 | DUSP4,IRF2,TNFSF10              | 3 |
| Cellular Assembly and Organization                    | binding of chromosome components                     | 2.70E-02 | BID,HIST2H2BE (includes others) | 2 |
| Skeletal and Muscular System Development and Function | differentiation of myotube                           | 2.70E-02 | BARX2,CDON                      | 2 |
| Cellular Development                                  | differentiation of myotube                           | 2.70E-02 | BARX2,CDON                      | 2 |
| Ophthalmic Disease                                    | eyelids open at birth                                | 2.70E-02 | LMO4,SIX1                       | 2 |
| Inflammatory Response                                 | cell-mediated response                               | 2.71E-02 | CADM1,ELF3,IRAK4,MUC1           | 4 |
| Embryonic Development                                 | development of skull                                 | 2.82E-02 | CDON,PHC1                       | 2 |
| Organismal Development                                | development of skull                                 | 2.82E-02 | CDON,PHC1                       | 2 |
| Tissue Development                                    | development of skull                                 | 2.82E-02 | CDON,PHC1                       | 2 |

|                                                                                                                                  |                                                    |          |                                                                                         |   |
|----------------------------------------------------------------------------------------------------------------------------------|----------------------------------------------------|----------|-----------------------------------------------------------------------------------------|---|
| Skeletal and Muscular System Development and Function                                                                            | development of skull                               | 2.82E-02 | CDON,PHC1                                                                               | 2 |
| Connective Tissue Development and Function                                                                                       | development of skull                               | 2.82E-02 | CDON,PHC1                                                                               | 2 |
| Organ Development                                                                                                                | development of skull                               | 2.82E-02 | CDON,PHC1                                                                               | 2 |
| Lipid Metabolism Small Molecule Biochemistry Carbohydrate Metabolism                                                             | hydrolysis of phosphatidic acid                    | 2.86E-02 | F2RL1,RGS2 (includes EG:19735),TNFSF10                                                  | 3 |
| Lipid Metabolism Small Molecule Biochemistry                                                                                     | hydrolysis of phosphatidic acid                    | 2.86E-02 | F2RL1,RGS2 (includes EG:19735),TNFSF10                                                  | 3 |
| Lipid Metabolism Small Molecule Biochemistry                                                                                     | hydrolysis of phosphatidic acid                    | 2.86E-02 | F2RL1,RGS2 (includes EG:19735),TNFSF10                                                  | 3 |
| Lipid Metabolism Small Molecule Biochemistry                                                                                     | quantity of steroid                                | 2.87E-02 | F2RL1,RGS2 (includes EG:19735),TNFSF10<br>ADCY8,CHST8,PDZK1,PRKAA2,PRKAR2B,ST3GAL5,WNT4 | 7 |
| Molecular Transport Free Radical Scavenging                                                                                      | quantity of steroid                                | 2.87E-02 | ADCY8,CHST8,PDZK1,PRKAA2,PRKAR2B,ST3GAL5,WNT4                                           | 7 |
| Auditory Disease Hereditary Disorder                                                                                             | quantity of steroid                                | 2.87E-02 | ADCY8,CHST8,PDZK1,PRKAA2,PRKAR2B,ST3GAL5,WNT4                                           | 7 |
| Neurological Disease Embryonic Development Cell Signaling Auditory Disease                                                       | production of superoxide                           | 2.93E-02 | F2RL1,NOXA1,PRKAA2                                                                      | 3 |
| Neurological Disease Embryonic Development Cell Signaling Auditory Disease                                                       | autosomal recessive deafness                       | 2.95E-02 | GJB2,SLC26A4                                                                            | 2 |
| Neurological Disease Embryonic Development Cell Signaling Auditory Disease                                                       | autosomal recessive deafness                       | 2.95E-02 | GJB2,SLC26A4                                                                            | 2 |
| Neurological Disease Embryonic Development Cell Signaling Auditory Disease                                                       | autosomal recessive deafness                       | 2.95E-02 | GJB2,SLC26A4                                                                            | 2 |
| Neurological Disease Embryonic Development Cell Signaling Auditory Disease                                                       | tubulogenesis                                      | 2.95E-02 | CADM1,WNT4                                                                              | 2 |
| Neurological Disease Embryonic Development Cell Signaling Auditory Disease                                                       | protein kinase cascade                             | 2.99E-02 | CDON,DUSP4,F2RL1,MAPK11,PPM1L,UBD                                                       | 6 |
| Neurological Disease Embryonic Development Cell Signaling Auditory Disease                                                       | deafness                                           | 3.07E-02 | GJB2,SIX1,SLC26A4                                                                       | 3 |
| Neurological Disease Embryonic Development Cell Signaling Auditory Disease                                                       | deafness                                           | 3.07E-02 | GJB2,SIX1,SLC26A4                                                                       | 3 |
| Neurological Disease Embryonic Development Cell Signaling Auditory Disease                                                       | cell death of squamous cell carcinoma cell lines   | 3.07E-02 | GJB2,SIX1,SLC26A4                                                                       | 3 |
| Cell Death and Survival Small Molecule Biochemistry Cellular Function and Maintenance Small Molecule Biochemistry Cell Signaling | cell lines                                         | 3.08E-02 | BID,TNFSF10                                                                             | 2 |
| Cell Death and Survival Small Molecule Biochemistry Cellular Function and Maintenance Small Molecule Biochemistry Cell Signaling | homeostasis of transition metal ion                | 3.08E-02 | SLC39A4,TFRC                                                                            | 2 |
| Cell Death and Survival Small Molecule Biochemistry Cellular Function and Maintenance Small Molecule Biochemistry Cell Signaling | homeostasis of transition metal ion                | 3.08E-02 | SLC39A4,TFRC                                                                            | 2 |
| Cell Death and Survival Small Molecule Biochemistry Cellular Function and Maintenance Small Molecule Biochemistry Cell Signaling | homeostasis of transition metal ion                | 3.08E-02 | SLC39A4,TFRC                                                                            | 2 |
| Cell Death and Survival Small Molecule Biochemistry Cellular Function and Maintenance Small Molecule Biochemistry Cell Signaling | oscillation of Ca <sup>2+</sup>                    | 3.08E-02 | MUC1,RGS2 (includes EG:19735)                                                           | 2 |
| Cell Death and Survival Small Molecule Biochemistry Cellular Function and Maintenance Small Molecule Biochemistry Cell Signaling | oscillation of Ca <sup>2+</sup>                    | 3.08E-02 | MUC1,RGS2 (includes EG:19735)                                                           | 2 |
| Vitamin and Mineral Metabolism                                                                                                   | oscillation of Ca <sup>2+</sup>                    | 3.08E-02 | MUC1,RGS2 (includes EG:19735)                                                           | 2 |
| Organ Morphology Hair and Skin Development and Function                                                                          | abnormal morphology of hair medulla                | 3.08E-02 | LIPH                                                                                    | 1 |
| Organ Morphology Hair and Skin Development and Function                                                                          | abnormal morphology of hair medulla                | 3.08E-02 | LIPH                                                                                    | 1 |
| Organ Morphology Hair and Skin Development and Function                                                                          | abnormal morphology of maxillary shelf             | 3.08E-02 | CDON                                                                                    | 1 |
| Organ Morphology Hair and Skin Development and Function                                                                          | abnormal morphology of nerve fiber layer of retina | 3.08E-02 | ASPA                                                                                    | 1 |
| Organ Morphology Hair and Skin Development and Function                                                                          | abnormal morphology of nerve fiber layer of retina | 3.08E-02 | ASPA                                                                                    | 1 |
| Organ Morphology Hair and Skin Development and Function                                                                          | abnormal morphology of nerve fiber layer of retina | 3.08E-02 | ASPA                                                                                    | 1 |
| Organ Morphology Hair and Skin Development and Function                                                                          | abnormal morphology of nerve fiber layer of retina | 3.08E-02 | ASPA                                                                                    | 1 |



|                                                           |                                                    |          |         |   |
|-----------------------------------------------------------|----------------------------------------------------|----------|---------|---|
| Tissue Development                                        | abnormal morphology of nerve fiber layer of retina | 3.08E-02 | ASPA    | 1 |
| Tissue Morphology                                         | abnormal morphology of nerve fiber layer of retina | 3.08E-02 | ASPA    | 1 |
| Organ Development Nervous System                          | abnormal morphology of nerve fiber layer of retina | 3.08E-02 | ASPA    | 1 |
| Development and Function Visual System                    | abnormal morphology of nerve fiber layer of retina | 3.08E-02 | ASPA    | 1 |
| Development and Function                                  | abnormal morphology of nerve fiber layer of retina | 3.08E-02 | ASPA    | 1 |
| Organ Morphology Embryonic                                | abnormal morphology of premaxilla                  | 3.08E-02 | CDON    | 1 |
| Development Organismal                                    | abnormal morphology of premaxilla                  | 3.08E-02 | CDON    | 1 |
| Development                                               | abnormal morphology of premaxilla                  | 3.08E-02 | CDON    | 1 |
| Tissue Development                                        | abnormal morphology of premaxilla                  | 3.08E-02 | CDON    | 1 |
| Skeletal and Muscular System Development and Function     | abnormal morphology of premaxilla                  | 3.08E-02 | CDON    | 1 |
| Connective Tissue Development and Function                | abnormal morphology of premaxilla                  | 3.08E-02 | CDON    | 1 |
| Organ Development                                         | abnormal morphology of premaxilla                  | 3.08E-02 | CDON    | 1 |
| Energy Production                                         | alpha-oxidation of fatty acid                      | 3.08E-02 | SLC27A2 | 1 |
| Lipid Metabolism Small Molecule                           | alpha-oxidation of fatty acid                      | 3.08E-02 | SLC27A2 | 1 |
| Biochemistry                                              | alpha-oxidation of fatty acid                      | 3.08E-02 | SLC27A2 | 1 |
| Cell Death and Survival                                   | apoptosis of Hodgkin and Reed-Sternberg cells      | 3.08E-02 | TNFSF10 | 1 |
| Tumor Morphology                                          | apoptosis of Hodgkin and Reed-Sternberg cells      | 3.08E-02 | TNFSF10 | 1 |
| Cell Death and Survival Cellular Function and Maintenance | apoptosis of follicular cells                      | 3.08E-02 | TNFSF10 | 1 |
| Cell Morphology                                           | autophagy of breast cell lines                     | 3.08E-02 | TNFSF10 | 1 |
| Cell Morphology                                           | autophagy of breast cell lines                     | 3.08E-02 | TNFSF10 | 1 |
| Reproductive System Development and Function              | autophagy of breast cell lines                     | 3.08E-02 | TNFSF10 | 1 |
| Cardiovascular Disease Cancer                             | cardiac hyperplasia                                | 3.08E-02 | CXADR   | 1 |
| Cardiovascular Disease Cancer                             | cardiac hyperplasia                                | 3.08E-02 | CXADR   | 1 |
| Small Molecule Biochemistry                               | catabolism of L-histidine                          | 3.08E-02 | HAL     | 1 |
| Amino Acid Metabolism                                     | catabolism of L-histidine                          | 3.08E-02 | HAL     | 1 |
| Hematological System Development and Function             | colony formation of B lymphocytes                  | 3.08E-02 | PHC1    | 1 |
| Hematopoiesis                                             | colony formation of B lymphocytes                  | 3.08E-02 | PHC1    | 1 |

|                                                       |                                    |          |         |   |
|-------------------------------------------------------|------------------------------------|----------|---------|---|
| Cellular Growth and Proliferation                     | colony formation of B lymphocytes  | 3.08E-02 | PHC1    | 1 |
| Humoral Immune Response                               | colony formation of B lymphocytes  | 3.08E-02 | PHC1    | 1 |
| Cell Death and Survival                               | cytolysis of melanoma cell lines   | 3.08E-02 | TNFSF10 | 1 |
| Tumor Morphology                                      | cytotoxic reaction of cancer cells | 3.08E-02 | TNFSF10 | 1 |
| Cell-To-Cell Signaling and Interaction                | cytotoxic reaction of cancer cells | 3.08E-02 | TNFSF10 | 1 |
| Inflammatory Response                                 | cytotoxic reaction of cancer cells | 3.08E-02 | TNFSF10 | 1 |
| Cancer                                                | cytotoxic reaction of cancer cells | 3.08E-02 | TNFSF10 | 1 |
| Embryonic Development                                 | development of mullerian duct      | 3.08E-02 | WNT4    | 1 |
| Organismal Development                                | development of mullerian duct      | 3.08E-02 | WNT4    | 1 |
| Tissue Development                                    | development of mullerian duct      | 3.08E-02 | WNT4    | 1 |
| Tumor Morphology                                      | differentiation of carcinoma       | 3.08E-02 | MUC1    | 1 |
| Cellular Development                                  | differentiation of carcinoma       | 3.08E-02 | MUC1    | 1 |
| Cancer                                                | differentiation of carcinoma       | 3.08E-02 | MUC1    | 1 |
| Cellular Assembly and Organization                    | disruption of lipid bilayer        | 3.08E-02 | BID     | 1 |
| Cellular Compromise                                   | disruption of lipid bilayer        | 3.08E-02 | BID     | 1 |
| Tissue Development                                    | formation of epithelial tubule     | 3.08E-02 | WNT4    | 1 |
| Cellular Compromise                                   | fragmentation of spindle pole      | 3.08E-02 | ACRBP   | 1 |
| Embryonic Development                                 | height of growth plate             | 3.08E-02 | IGFALS  | 1 |
| Organismal Development                                | height of growth plate             | 3.08E-02 | IGFALS  | 1 |
| Tissue Development                                    | height of growth plate             | 3.08E-02 | IGFALS  | 1 |
| Skeletal and Muscular System Development and Function | height of growth plate             | 3.08E-02 | IGFALS  | 1 |
| Connective Tissue Development and Function            | height of growth plate             | 3.08E-02 | IGFALS  | 1 |
| Organ Development                                     | height of growth plate             | 3.08E-02 | IGFALS  | 1 |
| Infectious Disease                                    | herpes simplex encephalitis        | 3.08E-02 | IRAK4   | 1 |
| Inflammatory Disease                                  | herpes simplex encephalitis        | 3.08E-02 | IRAK4   | 1 |
| Neurological Disease                                  | herpes simplex encephalitis        | 3.08E-02 | IRAK4   | 1 |
| Tissue Development                                    | inflammation of myocardium         | 3.08E-02 | IRAK4   | 1 |
| Inflammatory Response                                 | inflammation of myocardium         | 3.08E-02 | IRAK4   | 1 |
| Cellular Compromise                                   | injury of mitochondria             | 3.08E-02 | TNFSF10 | 1 |

|                                                         |                                                  |          |         |   |
|---------------------------------------------------------|--------------------------------------------------|----------|---------|---|
| Embryonic Development                                   | invasion of extravillous trophoblast cells       | 3.08E-02 | MUC1    | 1 |
| Cellular Movement                                       | invasion of extravillous trophoblast cells       | 3.08E-02 | MUC1    | 1 |
| Cell Death and Survival                                 | killing of cancer cells                          | 3.08E-02 | TNFSF10 | 1 |
| Tumor Morphology                                        | killing of cancer cells                          | 3.08E-02 | TNFSF10 | 1 |
| Cancer                                                  | killing of cancer cells                          | 3.08E-02 | TNFSF10 | 1 |
| Cell Death and Survival                                 | killing of colon cancer cell lines               | 3.08E-02 | TNFSF10 | 1 |
| Cell Death and Survival                                 | killing of endothelial cells                     | 3.08E-02 | PHC1    | 1 |
| Cell Death and Survival                                 | killing of lung cancer cell lines                | 3.08E-02 | TNFSF10 | 1 |
| Organ Morphology                                        | lack of vestibule                                | 3.08E-02 | SIX1    | 1 |
| Auditory and Vestibular System Development and Function | lack of vestibule                                | 3.08E-02 | SIX1    | 1 |
| Lipid Metabolism                                        | lipolysis of white adipose tissue                | 3.08E-02 | PRKAR2B | 1 |
| Small Molecule Biochemistry                             | lipolysis of white adipose tissue                | 3.08E-02 | PRKAR2B | 1 |
| Tissue Morphology                                       | lipolysis of white adipose tissue                | 3.08E-02 | PRKAR2B | 1 |
| Connective Tissue Development and Function              | lipolysis of white adipose tissue                | 3.08E-02 | PRKAR2B | 1 |
| Molecular Transport                                     | localization of green fluorescent protein        | 3.08E-02 | TFRC    | 1 |
| Protein Synthesis                                       | localization of green fluorescent protein        | 3.08E-02 | TFRC    | 1 |
| Protein Trafficking                                     | localization of green fluorescent protein        | 3.08E-02 | TFRC    | 1 |
| Cell-To-Cell Signaling and Interaction                  | long-term potentiation of collateral synapses    | 3.08E-02 | ADCY8   | 1 |
| Nervous System Development and Function                 | long-term potentiation of collateral synapses    | 3.08E-02 | ADCY8   | 1 |
| Cellular Development                                    | maturation of spermatids                         | 3.08E-02 | CADM1   | 1 |
| Reproductive System Development and Function            | maturation of spermatids                         | 3.08E-02 | CADM1   | 1 |
| Cellular Movement                                       | mobility of carcinoma cell lines                 | 3.08E-02 | CADM1   | 1 |
| Organismal Development                                  | osteoclastogenesis of peripheral blood monocytes | 3.08E-02 | TNFSF10 | 1 |
| Tissue Development                                      | osteoclastogenesis of peripheral blood monocytes | 3.08E-02 | TNFSF10 | 1 |
| Skeletal and Muscular System Development and Function   | osteoclastogenesis of peripheral blood monocytes | 3.08E-02 | TNFSF10 | 1 |
| Hematological System Development and Function           | osteoclastogenesis of peripheral blood monocytes | 3.08E-02 | TNFSF10 | 1 |

|                                           |                                                  |          |                           |   |
|-------------------------------------------|--------------------------------------------------|----------|---------------------------|---|
| Hematopoiesis                             | osteoclastogenesis of peripheral blood monocytes | 3.08E-02 | TNFSF10                   | 1 |
| Cellular Development                      | osteoclastogenesis of peripheral blood monocytes | 3.08E-02 | TNFSF10                   | 1 |
| Cardiovascular System                     |                                                  |          |                           |   |
| Development and Function                  | osteoclastogenesis of peripheral blood monocytes | 3.08E-02 | TNFSF10                   | 1 |
| Lymphoid Tissue Structure and Development | osteoclastogenesis of peripheral blood monocytes | 3.08E-02 | TNFSF10                   | 1 |
| Small Molecule Biochemistry               | phosphorylation of nucleoside diphosphates       | 3.08E-02 | NME5                      | 1 |
| Nucleic Acid Metabolism                   | phosphorylation of nucleoside diphosphates       | 3.08E-02 | NME5                      | 1 |
| Cell Morphology                           | polarity of epithelial cells                     | 3.08E-02 | ANK1                      | 1 |
| Embryonic Development                     | quantity of spongiotrophoblasts                  | 3.08E-02 | KRT19 (includes EG:16669) | 1 |
| Organismal Development                    | quantity of spongiotrophoblasts                  | 3.08E-02 | KRT19 (includes EG:16669) | 1 |
| Tissue Morphology                         | quantity of spongiotrophoblasts                  | 3.08E-02 | KRT19 (includes EG:16669) | 1 |
| Reproductive System                       |                                                  |          |                           |   |
| Development and Function                  | quantity of spongiotrophoblasts                  | 3.08E-02 | KRT19 (includes EG:16669) | 1 |
| Cellular Movement                         | release of blood platelets                       | 3.08E-02 | TFRC                      | 1 |
| Lipid Metabolism                          | release of dinoprost                             | 3.08E-02 | F2RL1                     | 1 |
| Small Molecule Biochemistry               | release of dinoprost                             | 3.08E-02 | F2RL1                     | 1 |
| Molecular Transport                       | release of dinoprost                             | 3.08E-02 | F2RL1                     | 1 |
| Cellular Function and Maintenance         | respiratory burst of peritoneal macrophages      | 3.08E-02 | IRF2                      | 1 |
| Cell-To-Cell Signaling and Interaction    | respiratory burst of peritoneal macrophages      | 3.08E-02 | IRF2                      | 1 |
| Inflammatory Response                     | respiratory burst of peritoneal macrophages      | 3.08E-02 | IRF2                      | 1 |
| Cellular Compromise                       | respiratory burst of peritoneal macrophages      | 3.08E-02 | IRF2                      | 1 |
| Small Molecule Biochemistry               | response of cyclic AMP                           | 3.08E-02 | RGS2 (includes EG:19735)  | 1 |
| Nucleic Acid Metabolism                   | response of cyclic AMP                           | 3.08E-02 | RGS2 (includes EG:19735)  | 1 |
| Cell Signaling                            | response of cyclic AMP                           | 3.08E-02 | RGS2 (includes EG:19735)  | 1 |
| Embryonic Development                     | secondary sex determination                      | 3.08E-02 | WNT4                      | 1 |
| Organismal Development                    | secondary sex determination                      | 3.08E-02 | WNT4                      | 1 |
| Small Molecule Biochemistry               | synthesis of S-adenosylmethionine                | 3.08E-02 | MAT2A                     | 1 |
| Nucleic Acid Metabolism                   | synthesis of S-adenosylmethionine                | 3.08E-02 | MAT2A                     | 1 |
| Amino Acid Metabolism                     | synthesis of S-adenosylmethionine                | 3.08E-02 | MAT2A                     | 1 |
| Lipid Metabolism                          | synthesis of ganglioside GM3                     | 3.08E-02 | ST3GAL5                   | 1 |
| Small Molecule Biochemistry               | synthesis of ganglioside GM3                     | 3.08E-02 | ST3GAL5                   | 1 |

|                                   |                                         |          |                                                                                                                             |    |
|-----------------------------------|-----------------------------------------|----------|-----------------------------------------------------------------------------------------------------------------------------|----|
| Embryonic Development             | tubulogenesis of metanephric mesenchyme | 3.08E-02 | WNT4                                                                                                                        | 1  |
| Organismal Development            | tubulogenesis of metanephric mesenchyme | 3.08E-02 | WNT4                                                                                                                        | 1  |
| Tissue Development                | tubulogenesis of metanephric mesenchyme | 3.08E-02 | WNT4                                                                                                                        | 1  |
| Cancer                            | tumor sphere                            | 3.08E-02 | SIX1                                                                                                                        | 1  |
| Embryonic Development             | vasculogenesis of yolk sac              | 3.08E-02 | FZD5                                                                                                                        | 1  |
| Organismal Development            | vasculogenesis of yolk sac              | 3.08E-02 | FZD5                                                                                                                        | 1  |
| Tissue Development                | vasculogenesis of yolk sac              | 3.08E-02 | FZD5                                                                                                                        | 1  |
| Cardiovascular System             |                                         |          |                                                                                                                             |    |
| Development and Function          | vasculogenesis of yolk sac              | 3.08E-02 | FZD5                                                                                                                        | 1  |
| Cell Death and Survival           | cell death of liver cells               | 3.11E-02 | BID,DUSP4,IRF2,TNFSF10                                                                                                      | 4  |
| Infectious Disease                | infection of mammalia                   | 3.16E-02 | DUSP4,F2RL1,IFNGR2,IRAK4,TNFSF10,UBD                                                                                        | 6  |
| Cancer                            | carcinoma in situ                       | 3.16E-02 | CHST8,FAM3B,MUC1,SEC14L4                                                                                                    | 4  |
| Small Molecule                    |                                         |          |                                                                                                                             |    |
| Biochemistry                      | quantity of insulin in blood            | 3.16E-02 | FAM3B,PRKAA2,PRKAR2B,RASGRF1                                                                                                | 4  |
| Endocrine System                  |                                         |          |                                                                                                                             |    |
| Development and Function          | quantity of insulin in blood            | 3.16E-02 | FAM3B,PRKAA2,PRKAR2B,RASGRF1                                                                                                | 4  |
| Molecular Transport               | quantity of insulin in blood            | 3.16E-02 | FAM3B,PRKAA2,PRKAR2B,RASGRF1                                                                                                | 4  |
| Protein Synthesis                 | quantity of insulin in blood            | 3.16E-02 | FAM3B,PRKAA2,PRKAR2B,RASGRF1                                                                                                | 4  |
| Gene Expression                   | transcription of RNA                    | 3.28E-02 | BARX2,BID,CCRN4L,CDON,DUSP4,ELF3,F2RL1,FZD5,HDAC9,HR,IRAK4,IRF2,LMO4,MAPK11,NFE2L3,POU6F1,PRKAR2B,RASGRF1,SIX1,TNFSF10,WNT4 | 21 |
| Cell Death and Survival           | cell death of kidney cell lines         | 3.34E-02 | BID,DUSP4,EMP2,TFRC,TNFSF10                                                                                                 | 5  |
| Cell Death and Survival           | apoptosis of fibrosarcoma cell lines    | 3.34E-02 | CSTA,TNFSF10                                                                                                                | 2  |
| Molecular Transport               | transport of heavy metal                | 3.34E-02 | SLC39A4,TFRC                                                                                                                | 2  |
| Cell Death and Survival           | apoptosis of fibroblasts                | 3.43E-02 | BID,PRKAR2B,TNFSF10,UBD                                                                                                     | 4  |
| Cellular Function and Maintenance |                                         |          |                                                                                                                             |    |
|                                   | transmembrane potential of mitochondria | 3.43E-02 | ABCD3,BID,MUC1,TNFSF10                                                                                                      | 4  |
|                                   | transmembrane potential of mitochondria | 3.43E-02 | ABCD3,BID,MUC1,TNFSF10                                                                                                      | 4  |
| Cell Morphology                   | mitochondria                            | 3.43E-02 | ABCD3,BID,MUC1,TNFSF10                                                                                                      | 4  |
| Cellular Function and Maintenance |                                         |          |                                                                                                                             |    |
|                                   | ion homeostasis of cells                | 3.58E-02 | F2RL1,KCNK5,RGS2 (includes EG:19735),SLC26A4,SLC39A4,TFRC,WNT4                                                              | 7  |
| Hematological System              |                                         |          |                                                                                                                             |    |
| Development and Function          | differentiation of leukocytes           | 3.59E-02 | ELF3,FZD5,HDAC9,IFNGR2,IRF2,PHC1,TNFSF10,UBD,WNT4                                                                           | 9  |
| Hematopoiesis                     | differentiation of leukocytes           | 3.59E-02 | ELF3,FZD5,HDAC9,IFNGR2,IRF2,PHC1,TNFSF10,UBD,WNT4                                                                           | 9  |
| Cellular Development              | differentiation of leukocytes           | 3.59E-02 | ELF3,FZD5,HDAC9,IFNGR2,IRF2,PHC1,TNFSF10,UBD,WNT4                                                                           | 9  |
| Nervous System                    |                                         |          |                                                                                                                             |    |
| Development and Function          | long-term memory                        | 3.61E-02 | ADCY8,RASGRF1                                                                                                               | 2  |
| Behavior                          | long-term memory                        | 3.61E-02 | ADCY8,RASGRF1                                                                                                               | 2  |

|                                        |                                       |          |                                                                                                                                                                         |    |
|----------------------------------------|---------------------------------------|----------|-------------------------------------------------------------------------------------------------------------------------------------------------------------------------|----|
| Gastrointestinal                       |                                       |          |                                                                                                                                                                         |    |
| Disease                                | pancreatic adenocarcinoma             | 3.61E-02 | GABRP,KRT19 (includes EG:16669)                                                                                                                                         | 2  |
| Cancer                                 | pancreatic adenocarcinoma             | 3.61E-02 | GABRP,KRT19 (includes EG:16669)                                                                                                                                         | 2  |
| Endocrine System                       |                                       |          |                                                                                                                                                                         |    |
| Disorders                              | pancreatic adenocarcinoma             | 3.61E-02 | GABRP,KRT19 (includes EG:16669)                                                                                                                                         | 2  |
| Tissue Morphology                      | relaxation of artery                  | 3.61E-02 | F2RL1,RGS2 (includes EG:19735)                                                                                                                                          | 2  |
| Cardiovascular System                  |                                       |          |                                                                                                                                                                         |    |
| Development and                        |                                       |          |                                                                                                                                                                         |    |
| Function                               | relaxation of artery                  | 3.61E-02 | F2RL1,RGS2 (includes EG:19735)                                                                                                                                          | 2  |
| Auditory Disease                       | sensorineural hearing loss            | 3.61E-02 | GJB2,SLC26A4                                                                                                                                                            | 2  |
| Neurological Disease                   | sensorineural hearing loss            | 3.61E-02 | GJB2,SLC26A4                                                                                                                                                            | 2  |
|                                        |                                       |          | ADI1 (includes EG:104923),BCL2L13,BID,CSTA,CXADR,DUSP4,EMP2,F2RL1,GABRP,GJB2,HDAC9,IRAK4,IRF2,MAPK11,MUC1,PDZK1,PGLYRP1,PRKAA2,PRKAR2B,SIX1,TFRC,TNFSF10,UBD,UHRF2,WNT4 | 25 |
| Cell Death and Survival                | necrosis                              | 3.66E-02 |                                                                                                                                                                         |    |
|                                        | abnormal morphology of basisphenoid   |          |                                                                                                                                                                         |    |
| Organ Morphology                       | bone foramen                          | 3.69E-02 | CDON                                                                                                                                                                    | 1  |
| Embryonic                              | abnormal morphology of basisphenoid   |          |                                                                                                                                                                         |    |
| Development                            | bone foramen                          | 3.69E-02 | CDON                                                                                                                                                                    | 1  |
| Organismal                             | abnormal morphology of basisphenoid   |          |                                                                                                                                                                         |    |
| Development                            | bone foramen                          | 3.69E-02 | CDON                                                                                                                                                                    | 1  |
|                                        | abnormal morphology of basisphenoid   |          |                                                                                                                                                                         |    |
| Tissue Development                     | bone foramen                          | 3.69E-02 | CDON                                                                                                                                                                    | 1  |
| Skeletal and Muscular                  |                                       |          |                                                                                                                                                                         |    |
| System Development and Function        |                                       |          |                                                                                                                                                                         |    |
|                                        | abnormal morphology of basisphenoid   |          |                                                                                                                                                                         |    |
|                                        | bone foramen                          | 3.69E-02 | CDON                                                                                                                                                                    | 1  |
| Connective Tissue                      |                                       |          |                                                                                                                                                                         |    |
| Development and Function               |                                       |          |                                                                                                                                                                         |    |
|                                        | abnormal morphology of basisphenoid   |          |                                                                                                                                                                         |    |
|                                        | bone foramen                          | 3.69E-02 | CDON                                                                                                                                                                    | 1  |
|                                        | abnormal morphology of basisphenoid   |          |                                                                                                                                                                         |    |
| Organ Development                      | bone foramen                          | 3.69E-02 | CDON                                                                                                                                                                    | 1  |
| Organismal                             |                                       |          |                                                                                                                                                                         |    |
| Development                            | abnormal morphology of lip            | 3.69E-02 | CDON                                                                                                                                                                    | 1  |
|                                        | abnormal morphology of marginal stria |          |                                                                                                                                                                         |    |
| Cell Morphology                        | vascularis cells                      | 3.69E-02 | SLC26A4                                                                                                                                                                 | 1  |
| Tissue Development                     | aggregation of kidney cell lines      | 3.69E-02 | CADM1                                                                                                                                                                   | 1  |
| Cell-To-Cell Signaling and Interaction |                                       |          |                                                                                                                                                                         |    |
|                                        | aggregation of kidney cell lines      | 3.69E-02 | CADM1                                                                                                                                                                   | 1  |
| Renal and Urological                   |                                       |          |                                                                                                                                                                         |    |
| System Development and Function        |                                       |          |                                                                                                                                                                         |    |
|                                        | aggregation of kidney cell lines      | 3.69E-02 | CADM1                                                                                                                                                                   | 1  |
| Embryonic                              |                                       |          |                                                                                                                                                                         |    |
| Development                            | angiogenesis of yolk sac              | 3.69E-02 | FZD5                                                                                                                                                                    | 1  |
| Organismal                             |                                       |          |                                                                                                                                                                         |    |
| Development                            | angiogenesis of yolk sac              | 3.69E-02 | FZD5                                                                                                                                                                    | 1  |
| Tissue Development                     | angiogenesis of yolk sac              | 3.69E-02 | FZD5                                                                                                                                                                    | 1  |
| Cardiovascular System                  |                                       |          |                                                                                                                                                                         |    |
| Development and Function               |                                       |          |                                                                                                                                                                         |    |
|                                        | angiogenesis of yolk sac              | 3.69E-02 | FZD5                                                                                                                                                                    | 1  |

|                                                         |                                                    |          |         |   |
|---------------------------------------------------------|----------------------------------------------------|----------|---------|---|
| Cell Death and Survival                                 | apoptosis of liver cancer cells                    | 3.69E-02 | TNFSF10 | 1 |
| Tumor Morphology                                        | apoptosis of liver cancer cells                    | 3.69E-02 | TNFSF10 | 1 |
| Cell Death and Survival                                 | apoptosis of mammary epithelial cells              | 3.69E-02 | TNFSF10 | 1 |
| Cell Death and Survival                                 | apoptosis of myeloid dendritic cells               | 3.69E-02 | TNFSF10 | 1 |
| Tumor Morphology                                        | arrest in mitosis of tumor cells                   | 3.69E-02 | ACRBP   | 1 |
| Cancer                                                  | arrest in mitosis of tumor cells                   | 3.69E-02 | ACRBP   | 1 |
| Cell Cycle                                              | arrest in mitosis of tumor cells                   | 3.69E-02 | ACRBP   | 1 |
| Cellular Assembly and Organization                      | binding of actin filaments                         | 3.69E-02 | CGN     | 1 |
| Cell Death and Survival                                 | cell death of plasma cells                         | 3.69E-02 | TNFSF10 | 1 |
| Dermatological Diseases and Conditions                  | clear cell acanthoma                               | 3.69E-02 | MUC1    | 1 |
| Cancer                                                  | clear cell acanthoma                               | 3.69E-02 | MUC1    | 1 |
| Antimicrobial Response                                  | clearance of Influenza A virus                     | 3.69E-02 | F2RL1   | 1 |
| Connective Tissue Disorders                             | collagen-induced arthritis of paw                  | 3.69E-02 | PHC1    | 1 |
| Inflammatory Disease                                    | collagen-induced arthritis of paw                  | 3.69E-02 | PHC1    | 1 |
| Skeletal and Muscular Disorders                         | collagen-induced arthritis of paw                  | 3.69E-02 | PHC1    | 1 |
| Auditory Disease                                        | degeneration of macula of sacculle                 | 3.69E-02 | SLC26A4 | 1 |
| Tissue Development                                      | development of trigeminal nerve                    | 3.69E-02 | LMO4    | 1 |
| Nervous System Development and Function                 | development of trigeminal nerve                    | 3.69E-02 | LMO4    | 1 |
| Skeletal and Muscular System Development and Function   | differentiation of skeletal muscle satellite cells | 3.69E-02 | CDON    | 1 |
| Cellular Development                                    | differentiation of skeletal muscle satellite cells | 3.69E-02 | CDON    | 1 |
| Cellular Function and Maintenance                       | extension of pseudopodia                           | 3.69E-02 | F2RL1   | 1 |
| Cell Morphology                                         | extension of pseudopodia                           | 3.69E-02 | F2RL1   | 1 |
| Cellular Assembly and Organization                      | extension of pseudopodia                           | 3.69E-02 | F2RL1   | 1 |
| Tissue Development                                      | formation of pannus tissue                         | 3.69E-02 | BID     | 1 |
| Respiratory Disease                                     | hemothorax                                         | 3.69E-02 | CXADR   | 1 |
| Inflammatory Response                                   | inflammation of ankle joint                        | 3.69E-02 | BID     | 1 |
| Organ Morphology                                        | lack of cochlea                                    | 3.69E-02 | SIX1    | 1 |
| Auditory and Vestibular System Development and Function | lack of cochlea                                    | 3.69E-02 | SIX1    | 1 |
| Organ Morphology                                        | lack of thymus gland                               | 3.69E-02 | SIX1    | 1 |
| Lymphoid Tissue Structure and Development               | lack of thymus gland                               | 3.69E-02 | SIX1    | 1 |
| Cellular Movement                                       | mobilization of dendritic cells                    | 3.69E-02 | IRAK4   | 1 |

|                                                      |                                                              |          |                                                                                                  |   |
|------------------------------------------------------|--------------------------------------------------------------|----------|--------------------------------------------------------------------------------------------------|---|
| Hematological System Development and Function        | mobilization of dendritic cells                              | 3.69E-02 | IRAK4                                                                                            | 1 |
| Inflammatory Response                                | mobilization of dendritic cells                              | 3.69E-02 | IRAK4                                                                                            | 1 |
| Immune Cell Trafficking                              | mobilization of dendritic cells                              | 3.69E-02 | IRAK4                                                                                            | 1 |
| Gastrointestinal Disease                             | obstructive cholestasis                                      | 3.69E-02 | GJB2                                                                                             | 1 |
| Hepatic System Disease                               | obstructive cholestasis<br>permeabilization of mitochondrial | 3.69E-02 | GJB2                                                                                             | 1 |
| Cell Morphology                                      | outer membrane                                               | 3.69E-02 | TNFSF10                                                                                          | 1 |
| Lipid Metabolism                                     | quantity of cardiolipin                                      | 3.69E-02 | TNFSF10                                                                                          | 1 |
| Small Molecule Biochemistry                          | quantity of cardiolipin                                      | 3.69E-02 | TNFSF10                                                                                          | 1 |
| Molecular Transport                                  | quantity of cardiolipin                                      | 3.69E-02 | TNFSF10                                                                                          | 1 |
| Molecular Transport                                  | release of glutathione                                       | 3.69E-02 | F2RL1                                                                                            | 1 |
| Drug Metabolism                                      | release of glutathione                                       | 3.69E-02 | F2RL1                                                                                            | 1 |
| Cell-To-Cell Signaling and Interaction               | response of peripheral blood leukocytes                      | 3.69E-02 | IRAK4                                                                                            | 1 |
| Hematological System Development and Function        | response of peripheral blood leukocytes                      | 3.69E-02 | IRAK4                                                                                            | 1 |
| Organismal Injury and Abnormalities                  | stenosis of pulmonary valve                                  | 3.69E-02 | PHC1                                                                                             | 1 |
| Cardiovascular Disease                               | stenosis of pulmonary valve                                  | 3.69E-02 | PHC1                                                                                             | 1 |
| Molecular Transport                                  | transport of DNA                                             | 3.69E-02 | TFRC                                                                                             | 1 |
| Small Molecule Biochemistry                          | transport of carnitine                                       | 3.69E-02 | PDZK1                                                                                            | 1 |
| Molecular Transport                                  | transport of carnitine                                       | 3.69E-02 | PDZK1                                                                                            | 1 |
| Tissue Development                                   | cell-cell adhesion                                           | 3.84E-02 | CADM1,CERCAM,CXADR                                                                               | 3 |
| Cell-To-Cell Signaling and Interaction               | cell-cell adhesion                                           | 3.84E-02 | CADM1,CERCAM,CXADR                                                                               | 3 |
| Cellular Compromise                                  | damage of neurons                                            | 3.89E-02 | RASGRF1,TNFSF10                                                                                  | 2 |
| Connective Tissue Disorders                          | adiposity                                                    | 3.92E-02 | PRKAA2,PRKAR2B,RASGRF1                                                                           | 3 |
| Metabolic Disease                                    | adiposity                                                    | 3.92E-02 | PRKAA2,PRKAR2B,RASGRF1                                                                           | 3 |
| Cellular Movement                                    | cell movement of kidney cell lines                           | 3.92E-02 | ADI1 (includes EG:104923),CADM1,PTPN14                                                           | 3 |
| Renal and Urological System Development and Function | cell movement of kidney cell lines                           | 3.92E-02 | ADI1 (includes EG:104923),CADM1,PTPN14                                                           | 3 |
| Cellular Development                                 | differentiation of keratinocytes                             | 4.00E-02 | CSTA,EVPL,TNFSF10                                                                                | 3 |
| Hair and Skin Development and Function               | differentiation of keratinocytes                             | 4.00E-02 | CSTA,EVPL,TNFSF10                                                                                | 3 |
| Gastrointestinal Disease                             | insulin-dependent diabetes mellitus                          | 4.02E-02 | HIST1H3A (includes others),HIST1H4A (includes others),HIST2H2BE (includes others),IFNGR2,TNFSF10 | 5 |



|                                                |                                              |          |                                                                                                                                                                                                                                                                            |    |
|------------------------------------------------|----------------------------------------------|----------|----------------------------------------------------------------------------------------------------------------------------------------------------------------------------------------------------------------------------------------------------------------------------|----|
| Endocrine System Disorders                     | insulin-dependent diabetes mellitus          | 4.02E-02 | HIST1H3A (includes others),HIST1H4A (includes others),HIST2H2BE (includes others),IFNGR2,TNFSF10                                                                                                                                                                           | 5  |
| Immunological Disease                          | insulin-dependent diabetes mellitus          | 4.02E-02 | HIST1H3A (includes others),HIST1H4A (includes others),HIST2H2BE (includes others),IFNGR2,TNFSF10                                                                                                                                                                           | 5  |
| Metabolic Disease                              | insulin-dependent diabetes mellitus          | 4.02E-02 | HIST1H3A (includes others),HIST1H4A (includes others),HIST2H2BE (includes others),IFNGR2,TNFSF10                                                                                                                                                                           | 5  |
| Cell Death and Survival                        | apoptosis of breast cell lines               | 4.03E-02 | BID,TNFSF10                                                                                                                                                                                                                                                                | 2  |
| Organ Morphology                               | abnormal morphology of cardiac valve         | 4.18E-02 | CXADR,PHC1                                                                                                                                                                                                                                                                 | 2  |
| Cardiovascular System Development and Function | abnormal morphology of cardiac valve         | 4.18E-02 | CXADR,PHC1                                                                                                                                                                                                                                                                 | 2  |
| Neurological Disease                           | bipolar I disorder                           | 4.18E-02 | DLG3,GABRP                                                                                                                                                                                                                                                                 | 2  |
| Psychological Disorders                        | bipolar I disorder                           | 4.18E-02 | DLG3,GABRP                                                                                                                                                                                                                                                                 | 2  |
| Cancer                                         | solid tumor                                  | 4.28E-02 | ABCD3,AIM1 (includes EG:11630),CHST8,DUSP4,F2RL1,FAM3B,GABRP,GOLM1,HIST1H3A (includes others),HIST1H4A (includes others),IFNGR2,IRF2,KRT19 (includes EG:16669),KRT23,LIPH,MAT2A,MUC1,NFE2L3,P2RX6,PDZK1,PPM1L,RGS2 (includes EG:19735),SEC14L4,SLC27A2,SLC39A4,SULT1C2,TFR | 28 |
| Organ Morphology                               | abnormal morphology of fur                   | 4.29E-02 | LIPH                                                                                                                                                                                                                                                                       | 1  |
| Hair and Skin Development and Function         | abnormal morphology of fur                   | 4.29E-02 | LIPH                                                                                                                                                                                                                                                                       | 1  |
| Organ Morphology                               | abnormal morphology of nail                  | 4.29E-02 | DNASE1L2                                                                                                                                                                                                                                                                   | 1  |
| Tissue Morphology                              | abnormal morphology of optic cup             | 4.29E-02 | PHC1                                                                                                                                                                                                                                                                       | 1  |
| Cell-To-Cell Signaling and Interaction         | activation of splenocytes                    | 4.29E-02 | PHC1                                                                                                                                                                                                                                                                       | 1  |
| Cell Death and Survival                        | anoikis of colon cancer cell lines           | 4.29E-02 | TNFSF10                                                                                                                                                                                                                                                                    | 1  |
| Cell Death and Survival                        | apoptosis of adipose cell lines              | 4.29E-02 | TNFSF10                                                                                                                                                                                                                                                                    | 1  |
| Cell Death and Survival                        | apoptosis of bone marrow-derived neutrophils | 4.29E-02 | BID                                                                                                                                                                                                                                                                        | 1  |

### PTEN Loss Up ERG Up

| Category                                      | Term                           | Count    | P-Value                                                                                                                                                                                      | Genes |
|-----------------------------------------------|--------------------------------|----------|----------------------------------------------------------------------------------------------------------------------------------------------------------------------------------------------|-------|
| Cellular Movement                             | cell movement of myeloid cells | 2.96E-17 | CASP1,CCL7,CCR5,CD44,CD47,CDKN1A,CFB,CORO1A,CXCL1,CXCR4,FPR2 (includes EG:100426968),FUT4,HIF1A,INHBA,OSM,PLAT,S100A8,SAA1,SELP,SIRPA,SLPI,SOCS3,SPP1 (includes EG:100359743),THBS2,TNFRSF18 | 25    |
| Hematological System Development and Function | cell movement of myeloid cells | 2.96E-17 | CASP1,CCL7,CCR5,CD44,CD47,CDKN1A,CFB,CORO1A,CXCL1,CXCR4,FPR2 (includes EG:100426968),FUT4,HIF1A,INHBA,OSM,PLAT,S100A8,SAA1,SELP,SIRPA,SLPI,SOCS3,SPP1 (includes EG:100359743),THBS2,TNFRSF18 | 25    |

|                                               |                                |          |                                                                                                                                                                                                                        |    |
|-----------------------------------------------|--------------------------------|----------|------------------------------------------------------------------------------------------------------------------------------------------------------------------------------------------------------------------------|----|
| Immune Cell Trafficking                       | cell movement of myeloid cells | 2.96E-17 | CASP1,CCL7,CCR5,CD44,CD47,CDKN1A,CFB,CORO1A,CXCL1,CXCR4,FPR2 (includes EG:100426968),FUT4,HIF1A,INHBA,OSM,PLAT,S100A8,SAA1,SELP,SIRPA,SLPI,SOCS3,SPP1 (includes EG:100359743),THBS2,TNFRSF18                           | 25 |
| Cellular Movement                             | cell movement of leukocytes    | 2.34E-16 | CASP1,CCL7,CCR5,CD44,CD47,CDKN1A,CFB,CIITA,CORO1A,CXCL1,CXCR4,FPR2 (includes EG:100426968),FUT4,HIF1A,INHBA,OSM,PLAT,RAP1GAP,RGS1,S100A8,SAA1,SELP,SIRPA,SLPI,SOCS3,SPP1 (includes EG:100359743),THBS2,TNFRSF18        | 28 |
| Hematological System Development and Function | cell movement of leukocytes    | 2.34E-16 | CASP1,CCL7,CCR5,CD44,CD47,CDKN1A,CFB,CIITA,CORO1A,CXCL1,CXCR4,FPR2 (includes EG:100426968),FUT4,HIF1A,INHBA,OSM,PLAT,RAP1GAP,RGS1,S100A8,SAA1,SELP,SIRPA,SLPI,SOCS3,SPP1 (includes EG:100359743),THBS2,TNFRSF18        | 28 |
| Immune Cell Trafficking                       | cell movement of leukocytes    | 2.34E-16 | CASP1,CCL7,CCR5,CD44,CD47,CDKN1A,CFB,CIITA,CORO1A,CXCL1,CXCR4,FPR2 (includes EG:100426968),FUT4,HIF1A,INHBA,OSM,PLAT,RAP1GAP,RGS1,S100A8,SAA1,SELP,SIRPA,SLPI,SOCS3,SPP1 (includes EG:100359743),THBS2,TNFRSF18        | 28 |
| Cellular Movement                             | cell movement of phagocytes    | 5.49E-16 | CASP1,CCL7,CCR5,CD44,CD47,CDKN1A,CFB,CORO1A,CXCL1,CXCR4,FPR2 (includes EG:100426968),FUT4,HIF1A,INHBA,PLAT,S100A8,SAA1,SELP,SIRPA,SLPI,SOCS3,SPP1 (includes EG:100359743),THBS2,TNFRSF18                               | 24 |
| Hematological System Development and Function | cell movement of phagocytes    | 5.49E-16 | CASP1,CCL7,CCR5,CD44,CD47,CDKN1A,CFB,CORO1A,CXCL1,CXCR4,FPR2 (includes EG:100426968),FUT4,HIF1A,INHBA,PLAT,S100A8,SAA1,SELP,SIRPA,SLPI,SOCS3,SPP1 (includes EG:100359743),THBS2,TNFRSF18                               | 24 |
| Immune Cell Trafficking                       | cell movement of phagocytes    | 5.49E-16 | CASP1,CCL7,CCR5,CD44,CD47,CDKN1A,CFB,CORO1A,CXCL1,CXCR4,FPR2 (includes EG:100426968),FUT4,HIF1A,INHBA,PLAT,S100A8,SAA1,SELP,SIRPA,SLPI,SOCS3,SPP1 (includes EG:100359743),THBS2,TNFRSF18                               | 24 |
| Inflammatory Response                         | cell movement of phagocytes    | 5.49E-16 | CASP1,CCL7,CCR5,CD44,CD47,CDKN1A,CORO1A,CXCL1,CXCR4,DUSP6,FPR2 (includes EG:100426968),INHBA,PTPN1,RAP1GAP,RGS1,S100A8,SAA1,SELP,SEMA3F,SIRPA,SLPI,SOCS3,SPP1 (includes EG:100359743),THBS2                            | 24 |
| Cellular Movement                             | homing of cells                | 6.41E-16 | CASP1,CCL7,CCR5,CD44,CD47,CDKN1A,CFB,CHI3L1,CIITA,CORO1A,CXCL1,CXCR4,FPR2 (includes EG:100426968),FUT4,HIF1A,INHBA,OSM,PLAT,RAP1GAP,RGS1,S100A8,SAA1,SELP,SIRPA,SLPI,SOCS3,SPP1 (includes EG:100359743),THBS2,TNFRSF18 | 29 |

|                                               |                          |          |                                                                                                                                                                                                                                              |    |
|-----------------------------------------------|--------------------------|----------|----------------------------------------------------------------------------------------------------------------------------------------------------------------------------------------------------------------------------------------------|----|
| Immune Cell Trafficking                       | leukocyte migration      | 1.22E-15 | CASP1,CCL7,CCR5,CD44,CD47,CDKN1A,CFB,CHI3L1,C<br>IITA,CORO1A,CXCL1,CXCR4,FPR2 (includes<br>EG:100426968),FUT4,HIF1A,INHBA,OSM,PLAT,RAP1<br>GAP,RGS1,S100A8,SAA1,SELP,SIRPA,SLPI,SOCS3,SPP<br>1 (includes EG:100359743),THBS2,TNFRSF18        | 29 |
| Cellular Movement                             | chemotaxis of cells      | 2.00E-15 | CASP1,CCL7,CCR5,CD44,CD47,CDKN1A,CORO1A,CXC<br>L1,CXCR4,DUSP6,FPR2 (includes<br>EG:100426968),INHBA,RAP1GAP,RGS1,S100A8,SAA1<br>,SELP,SEMA3F,SIRPA,SLPI,SOCS3,SPP1 (includes<br>EG:100359743),THBS2                                          | 23 |
| Cellular Movement                             | homing of leukocytes     | 6.36E-15 | CASP1,CCL7,CCR5,CD44,CD47,CDKN1A,CORO1A,CXC<br>L1,CXCR4,FPR2 (includes<br>EG:100426968),INHBA,RAP1GAP,RGS1,S100A8,SAA1<br>,SELP,SLPI,SOCS3,SPP1 (includes<br>EG:100359743),THBS2                                                             | 20 |
| Hematological System Development and Function | homing of leukocytes     | 6.36E-15 | CASP1,CCL7,CCR5,CD44,CD47,CDKN1A,CORO1A,CXC<br>L1,CXCR4,FPR2 (includes<br>EG:100426968),INHBA,RAP1GAP,RGS1,S100A8,SAA1<br>,SELP,SLPI,SOCS3,SPP1 (includes<br>EG:100359743),THBS2                                                             | 20 |
| Immune Cell Trafficking                       | homing of leukocytes     | 6.36E-15 | CASP1,CCL7,CCR5,CD44,CD47,CDKN1A,CEBPB<br>(includes<br>EG:1051),CHI3L1,CIITA,CORO1A,CXCL1,CXCR4,FPR2<br>(includes<br>EG:100426968),IER3,INHBA,OSM,RAP1GAP,RGS1,S1<br>00A8,SAA1,SELP,SLC11A1,SLPI,SOCS3,SPP1 (includes<br>EG:100359743),THBS2 | 26 |
| Inflammatory Response                         | inflammatory response    | 1.04E-14 | CASP1,CCL7,CCR5,CD47,CDKN1A,CORO1A,CXCL1,CX<br>CR4,FPR2 (includes<br>EG:100426968),INHBA,RAP1GAP,RGS1,S100A8,SAA1<br>,SELP,SLPI,SOCS3,SPP1 (includes<br>EG:100359743),THBS2                                                                  | 19 |
| Cellular Movement                             | chemotaxis of leukocytes | 2.87E-14 | CASP1,CCL7,CCR5,CD47,CDKN1A,CORO1A,CXCL1,CX<br>CR4,FPR2 (includes<br>EG:100426968),INHBA,RAP1GAP,RGS1,S100A8,SAA1<br>,SELP,SLPI,SOCS3,SPP1 (includes<br>EG:100359743),THBS2                                                                  | 19 |
| Hematological System Development and Function | chemotaxis of leukocytes | 2.87E-14 | CASP1,CCL7,CCR5,CD47,CDKN1A,CORO1A,CXCL1,CX<br>CR4,FPR2 (includes<br>EG:100426968),INHBA,RAP1GAP,RGS1,S100A8,SAA1<br>,SELP,SLPI,SOCS3,SPP1 (includes<br>EG:100359743),THBS2                                                                  | 19 |
| Immune Cell Trafficking                       | chemotaxis of leukocytes | 2.87E-14 | CASP1,CCL7,CCR5,CD47,CDKN1A,CORO1A,CXCL1,CX<br>CR4,FPR2 (includes<br>EG:100426968),INHBA,RAP1GAP,RGS1,S100A8,SAA1<br>,SELP,SLPI,SOCS3,SPP1 (includes<br>EG:100359743),THBS2                                                                  | 19 |
| Inflammatory Response                         | chemotaxis of leukocytes | 2.87E-14 | CASP1,CCL7,CCR5,CD47,CDKN1A,CORO1A,CXCL1,CX<br>CR4,FPR2 (includes<br>EG:100426968),INHBA,RAP1GAP,RGS1,S100A8,SAA1<br>,SELP,SLPI,SOCS3,SPP1 (includes<br>EG:100359743),THBS2                                                                  | 19 |

|                                               |                               |          |                                                                                                                                                                                                                                                                                  |    |
|-----------------------------------------------|-------------------------------|----------|----------------------------------------------------------------------------------------------------------------------------------------------------------------------------------------------------------------------------------------------------------------------------------|----|
| Cellular Movement                             | cell movement of granulocytes | 4.22E-14 | CASP1,CCL7,CD44,CD47,CFB,CORO1A,CXCL1,FPR2 (includes EG:100426968),FUT4,OSM,PLAT,S100A8,SAA1,SELP,SIRPA,SLPI,SOCS3,SPP1 (includes EG:100359743),TNFRSF18                                                                                                                         | 19 |
| Hematological System Development and Function | cell movement of granulocytes | 4.22E-14 | CASP1,CCL7,CD44,CD47,CFB,CORO1A,CXCL1,FPR2 (includes EG:100426968),FUT4,OSM,PLAT,S100A8,SAA1,SELP,SIRPA,SLPI,SOCS3,SPP1 (includes EG:100359743),TNFRSF18                                                                                                                         | 19 |
| Immune Cell Trafficking                       | cell movement of granulocytes | 4.22E-14 | CASP1,CCL7,CD44,CD47,CFB,CORO1A,CXCL1,FPR2 (includes EG:100426968),FUT4,OSM,PLAT,S100A8,SAA1,SELP,SIRPA,SLPI,SOCS3,SPP1 (includes EG:100359743),TNFRSF18                                                                                                                         | 19 |
| Cellular Movement                             | cell movement of neutrophils  | 9.38E-14 | CASP1,CCL7,CD44,CD47,CFB,CORO1A,CXCL1,FPR2 (includes EG:100426968),FUT4,PLAT,S100A8,SAA1,SELP,SLPI,SOCS3,SPP1 (includes EG:100359743),TNFRSF18                                                                                                                                   | 17 |
| Hematological System Development and Function | cell movement of neutrophils  | 9.38E-14 | CASP1,CCL7,CD44,CD47,CFB,CORO1A,CXCL1,FPR2 (includes EG:100426968),FUT4,PLAT,S100A8,SAA1,SELP,SLPI,SOCS3,SPP1 (includes EG:100359743),TNFRSF18                                                                                                                                   | 17 |
| Immune Cell Trafficking                       | cell movement of neutrophils  | 9.38E-14 | CASP1,CCL7,CD44,CD47,CFB,CORO1A,CXCL1,FPR2 (includes EG:100426968),FUT4,PLAT,S100A8,SAA1,SELP,SLPI,SOCS3,SPP1 (includes EG:100359743),TNFRSF18                                                                                                                                   | 17 |
| Inflammatory Response                         | cell movement of neutrophils  | 9.38E-14 | CASP1,CCL7,CD44,CD47,CFB,CORO1A,CXCL1,FPR2 (includes EG:100426968),FUT4,PLAT,S100A8,SAA1,SELP,SLPI,SOCS3,SPP1 (includes EG:100359743),TNFRSF18                                                                                                                                   | 17 |
| Cell-To-Cell Signaling and Interaction        | adhesion of blood cells       | 9.70E-14 | CASP1,CCL7,CD44,CD47,CFB,CORO1A,CXCL1,FPR2 (includes EG:100426968),FUT4,HIF1A,MSN,OSM,RAP1GAP,RS1,S100A8,SAA1,SELP,SIRPA,SPP1 (includes EG:100359743),THBS2                                                                                                                      | 19 |
| Tissue Development                            | adhesion of blood cells       | 9.70E-14 | CASP1,CCL7,CD44,CD47,CFB,CORO1A,CXCL1,FPR2 (includes EG:100426968),FUT4,HIF1A,MSN,OSM,RAP1GAP,RS1,S100A8,SAA1,SELP,SIRPA,SPP1 (includes EG:100359743),THBS2                                                                                                                      | 19 |
| Cellular Movement                             | cell movement                 | 1.96E-13 | CASP1,CCL7,CCR5,CD44,CD47,CDKN1A,CFB,CHI3L1,CIITA,CORO1A,CXCL1,CXCR4,DAB2,DUSP6,FPR2 (includes EG:100426968),FUT4,HIF1A,INHBA,LRIG1,MSN,NAV1,OSM,OSMR,PLAT,PTPN1,RAP1GAP,RGS1,S100A8,SAA1,SELP,SEMA3F,SIRPA,SLC11A1,SLPI,SOCS3,SPP1 (includes EG:100359743),TGFB1,THBS2,TNFRSF18 | 39 |
| Hematological System Development and Function | adhesion of immune cells      | 2.39E-13 | CASP1,CCL7,CCR5,CD44,CD47,CDKN1A,CFB,CHI3L1,CIITA,CORO1A,CXCL1,CXCR4,DAB2,DUSP6,FPR2 (includes EG:100426968),FUT4,HIF1A,MSN,OSM,RAP1GAP,RS1,S100A8,SELP,SIRPA,SPP1 (includes EG:100359743),THBS2                                                                                 | 18 |

|                                               |                           |          |                                                                                                                                                                                                                                                               |    |
|-----------------------------------------------|---------------------------|----------|---------------------------------------------------------------------------------------------------------------------------------------------------------------------------------------------------------------------------------------------------------------|----|
| Immune Cell Trafficking                       | adhesion of immune cells  | 2.39E-13 | CCL7,CCR5,CD44,CD47,CORO1A,CXCR4,FPR2 (includes EG:100426968),FUT4,HIF1A,MSN,OSM,RAP1GAP,RS1,S100A8,SELP,SIRPA,SPP1 (includes EG:100359743),THBS2                                                                                                             | 18 |
| Cell-To-Cell Signaling and Interaction        | adhesion of immune cells  | 2.39E-13 | CCL7,CCR5,CD44,CD47,CORO1A,CXCR4,FPR2 (includes EG:100426968),FUT4,HIF1A,MSN,OSM,RAP1GAP,RS1,S100A8,SELP,SIRPA,SPP1 (includes EG:100359743),THBS2                                                                                                             | 18 |
| Tissue Development                            | adhesion of immune cells  | 2.39E-13 | CCL7,CCR5,CD44,CD47,CORO1A,CXCR4,FPR2 (includes EG:100426968),FUT4,HIF1A,MSN,OSM,RAP1GAP,RS1,S100A8,SELP,SIRPA,SPP1 (includes EG:100359743),THBS2                                                                                                             | 18 |
| Hematological System Development and Function | quantity of blood cells   | 3.93E-13 | BST2,CCL7,CCR5,CD44,CD47,CDKN1A,CEBPB (includes EG:1051),CHI3L1,CIITA,CORO1A,CXCR4,FPR2 (includes EG:100426968),FUT4,HIF1A,INHBA,OSM,PLAT,PLEK, RGS1,S100A8,SAMSN1,SELP,SIRPA,SOAT1,SOCS3,SP P1 (includes EG:100359743),SRGN,TGFBI,THBS2                      | 29 |
| Tissue Morphology                             | quantity of blood cells   | 3.93E-13 | BST2,CCL7,CCR5,CD44,CD47,CDKN1A,CEBPB (includes EG:1051),CHI3L1,CIITA,CORO1A,CXCR4,FPR2 (includes EG:100426968),FUT4,HIF1A,INHBA,OSM,PLAT,PLEK, RGS1,S100A8,SAMSN1,SELP,SIRPA,SOAT1,SOCS3,SP P1 (includes EG:100359743),SRGN,TGFBI,THBS2                      | 29 |
| Hematological System Development and Function | activation of blood cells | 1.00E-12 | CASP1,CCL7,CCR5,CD44,CD47,CDKN1A,CEBPB (includes EG:1051),CHI3L1,CORO1A,CXCL1,FPR2 (includes EG:100426968),HIF1A,MGST1,OSM,PLAT,PLEK,S100 A8,SAMSN1,SELP,SIRPA,SLC11A1,SLPI,SPP1 (includes EG:100359743),TNFRSF18                                             | 24 |
| Cell-To-Cell Signaling and Interaction        | activation of blood cells | 1.00E-12 | CASP1,CCL7,CCR5,CD44,CD47,CDKN1A,CEBPB (includes EG:1051),CHI3L1,CORO1A,CXCL1,FPR2 (includes EG:100426968),HIF1A,MGST1,OSM,PLAT,PLEK,S100 A8,SAMSN1,SELP,SIRPA,SLC11A1,SLPI,SPP1 (includes EG:100359743),TNFRSF18                                             | 24 |
| Cell Death and Survival                       | apoptosis of blood cells  | 1.14E-12 | CASP1,CCR5,CD44,CD47,CDKN1A,CEBPB (includes EG:1051),CHI3L1,CIITA,CORO1A,CXCL1,CXCR4,HIF1A ,IER3,LRIG1,OSM,SLPI,SOAT1,SPP1 (includes EG:100359743),THBS2,TNFRSF18                                                                                             | 20 |
| Cellular Movement                             | migration of cells        | 1.17E-12 | CASP1,CCL7,CCR5,CD44,CD47,CDKN1A,CFB,CHI3L1,CIITA,CORO1A,CXCL1,CXCR4,DAB2,FPR2 (includes EG:100426968),FUT4,HIF1A,INHBA,MSN,NAV1,OSM, OSMR,PLAT,PTPN1,RAP1GAP,RGS1,S100A8,SA1,SE LP,SEMA3F,SIRPA,SLPI,SOCS3,SPP1 (includes EG:100359743),TGFBI,THBS2,TNFRSF18 | 36 |

|                                               |                             |          |                                                                                                                                                                                                                             |    |
|-----------------------------------------------|-----------------------------|----------|-----------------------------------------------------------------------------------------------------------------------------------------------------------------------------------------------------------------------------|----|
| Cellular Movement                             | chemotaxis of myeloid cells | 1.80E-12 | CASP1,CCL7,CCR5,CD47,CDKN1A,CORO1A,CXCL1,CXCR4,FPR2 (includes EG:100426968),INHBA,S100A8,SAA1,SELP,SLPI,SPP1 (includes EG:100359743),THBS2                                                                                  | 16 |
| Hematological System Development and Function | chemotaxis of myeloid cells | 1.80E-12 | CASP1,CCL7,CCR5,CD47,CDKN1A,CORO1A,CXCL1,CXCR4,FPR2 (includes EG:100426968),INHBA,S100A8,SAA1,SELP,SLPI,SPP1 (includes EG:100359743),THBS2                                                                                  | 16 |
| Immune Cell Trafficking                       | chemotaxis of myeloid cells | 1.80E-12 | CASP1,CCL7,CCR5,CD47,CDKN1A,CORO1A,CXCL1,CXCR4,FPR2 (includes EG:100426968),INHBA,S100A8,SAA1,SELP,SLPI,SPP1 (includes EG:100359743),THBS2                                                                                  | 16 |
| Inflammatory Response                         | chemotaxis of myeloid cells | 1.80E-12 | CASP1,CCL7,CCR5,CD47,CDKN1A,CORO1A,CXCL1,CXCR4,FPR2 (includes EG:100426968),INHBA,S100A8,SAA1,SELP,SLPI,SPP1 (includes EG:100359743),THBS2                                                                                  | 16 |
| Cellular Movement                             | chemotaxis of phagocytes    | 2.83E-12 | CASP1,CCL7,CCR5,CD47,CDKN1A,CORO1A,CXCL1,CXCR4,FPR2 (includes EG:100426968),INHBA,S100A8,SAA1,SELP,SLPI,SPP1 (includes EG:100359743),THBS2                                                                                  | 16 |
| Hematological System Development and Function | chemotaxis of phagocytes    | 2.83E-12 | CASP1,CCL7,CCR5,CD47,CDKN1A,CORO1A,CXCL1,CXCR4,FPR2 (includes EG:100426968),INHBA,S100A8,SAA1,SELP,SLPI,SPP1 (includes EG:100359743),THBS2                                                                                  | 16 |
| Immune Cell Trafficking                       | chemotaxis of phagocytes    | 2.83E-12 | CASP1,CCL7,CCR5,CD47,CDKN1A,CORO1A,CXCL1,CXCR4,FPR2 (includes EG:100426968),INHBA,S100A8,SAA1,SELP,SLPI,SPP1 (includes EG:100359743),THBS2                                                                                  | 16 |
| Inflammatory Response                         | chemotaxis of phagocytes    | 2.83E-12 | CASP1,CCL7,CCR5,CD47,CDKN1A,CORO1A,CXCL1,CXCR4,FPR2 (includes EG:100426968),INHBA,S100A8,SAA1,SELP,SLPI,SPP1 (includes EG:100359743),THBS2                                                                                  | 16 |
| Cell Death and Survival                       | apoptosis of leukocytes     | 3.11E-12 | CASP1,CCR5,CD44,CD47,CDKN1A,CEBPB (includes EG:1051),CHI3L1,CIITA,CORO1A,CXCL1,CXCR4,HIF1A,IER3,LRIG1,SLPI,SOAT1,SPP1 (includes EG:100359743),THBS2,TNFRSF18                                                                | 19 |
| Hematological System Development and Function | quantity of leukocytes      | 5.62E-12 | BST2,CCL7,CCR5,CD47,CDKN1A,CEBPB (includes EG:1051),CHI3L1,CIITA,CORO1A,CXCR4,FPR2 (includes EG:100426968),FUT4,HIF1A,INHBA,OSM,PLAT,RGS1,S100A8,SAMSN1,SELP,SIRPA,SOAT1,SOCS3,SPP1 (includes EG:100359743),SRGN,TGFB1      | 26 |
| Tissue Morphology                             | quantity of leukocytes      | 5.62E-12 | BST2,CCL7,CCR5,CD47,CDKN1A,CEBPB (includes EG:1051),CHI3L1,CIITA,CORO1A,CXCR4,FPR2 (includes EG:100426968),FUT4,HIF1A,INHBA,OSM,PLAT,RGS1,S100A8,SAMSN1,SELP,SIRPA,SOAT1,SOCS3,SPP1 (includes EG:100359743),SRGN,TGFB1      | 26 |
| Cell-To-Cell Signaling and Interaction        | activation of cells         | 8.07E-12 | CASP1,CCL7,CCR5,CD44,CD47,CDKN1A,CEBPB (includes EG:1051),CHI3L1,CORO1A,CXCL1,CXCR4,FPR2 (includes EG:100426968),HIF1A,MGST1,OSM,PLAT,PLEK,S100A8,SAA1,SAMSN1,SELP,SIRPA,SLC11A1,SLPI,SPP1 (includes EG:100359743),TNFRSF18 | 26 |

|                                               |                                         |          |                                                                                                                                                                                                                                                           |    |
|-----------------------------------------------|-----------------------------------------|----------|-----------------------------------------------------------------------------------------------------------------------------------------------------------------------------------------------------------------------------------------------------------|----|
| Cellular Movement                             | cell movement of mononuclear leukocytes | 3.22E-11 | CCL7,CCR5,CD44,CD47,CIITA,CXCR4,FPR2 (includes EG:100426968),FUT4,INHBA,OSM,RAP1GAP,RGS1,SAA1,SELP,SIRPA,SOCS3,SPP1 (includes EG:100359743),THBS2                                                                                                         | 18 |
| Hematological System Development and Function | cell movement of mononuclear leukocytes | 3.22E-11 | CCL7,CCR5,CD44,CD47,CIITA,CXCR4,FPR2 (includes EG:100426968),FUT4,INHBA,OSM,RAP1GAP,RGS1,SAA1,SELP,SIRPA,SOCS3,SPP1 (includes EG:100359743),THBS2                                                                                                         | 18 |
| Immune Cell Trafficking                       | cell movement of mononuclear leukocytes | 3.22E-11 | CCL7,CCR5,CD44,CD47,CIITA,CXCR4,FPR2 (includes EG:100426968),FUT4,INHBA,OSM,RAP1GAP,RGS1,SAA1,SELP,SIRPA,SOCS3,SPP1 (includes EG:100359743),THBS2                                                                                                         | 18 |
| Cellular Movement                             | cell movement of tumor cell lines       | 9.85E-11 | CCL7,CCR5,CD44,CD47,CXCR4,DAB2,FPR2 (includes EG:100426968),LRIG1,MSN,OSM,PTPN1,RAP1GAP,RGS1,S100A8,SELP,SEMA3F,SIRPA,SOCS3,SPP1 (includes EG:100359743),TGFB1,THBS2                                                                                      | 21 |
| Cell Death and Survival                       | cell death of blood cells               | 1.01E-10 | CASP1,CCR5,CD44,CD47,CDKN1A,CEBPB (includes EG:1051),CHI3L1,CIITA,CORO1A,CXCL1,CXCR4,HIF1A,IER3,INHBA,LRIG1,OSM,SLPI,SOAT1,SPP1 (includes EG:100359743),THBS2,TNFRSF18                                                                                    | 21 |
| Cellular Function and Maintenance             | function of phagocytes                  | 1.02E-10 | CASP1,CD47,CEBPB (includes EG:1051),CHI3L1,CIITA,FPR2 (includes EG:100426968),FUT4,PADI4,PLAT,RGS1,SAMSN1,SELP,SIRPA,SLPI,SPP1 (includes EG:100359743)                                                                                                    | 15 |
| Cellular Movement                             | migration of phagocytes                 | 1.08E-10 | CCL7,CCR5,CD44,CD47,CXCL1,CXCR4,HIF1A,S100A8,SAA1,SELP,SIRPA,SLPI,SOCS3,SPP1 (includes EG:100359743)                                                                                                                                                      | 14 |
| Hematological System Development and Function | migration of phagocytes                 | 1.08E-10 | CCL7,CCR5,CD44,CD47,CXCL1,CXCR4,HIF1A,S100A8,SAA1,SELP,SIRPA,SLPI,SOCS3,SPP1 (includes EG:100359743)                                                                                                                                                      | 14 |
| Immune Cell Trafficking                       | migration of phagocytes                 | 1.08E-10 | CCL7,CCR5,CD44,CD47,CXCL1,CXCR4,HIF1A,S100A8,SAA1,SELP,SIRPA,SLPI,SOCS3,SPP1 (includes EG:100359743)                                                                                                                                                      | 14 |
| Inflammatory Response                         | migration of phagocytes                 | 1.08E-10 | CCL7,CCR5,CD44,CD47,CXCL1,CXCR4,HIF1A,S100A8,SAA1,SELP,SIRPA,SLPI,SOCS3,SPP1 (includes EG:100359743)                                                                                                                                                      | 14 |
| Tissue Morphology                             | quantity of cells                       | 1.49E-10 | BST2,CCL7,CCR5,CD44,CD47,CDKN1A,CEBPB (includes EG:1051),CHI3L1,CIITA,CORO1A,CP,CXCL1,CXCR4,FPR2 (includes EG:100426968),FUT4,GDA,HIF1A,INHBA,INSL3,OSM,PLAT,PLEK,RGS1,S100A8,SAMSN1,SELP,SIRPA,SOAT1,SOCS3,SPP1 (includes EG:100359743),SRGN,TGFB1,THBS2 | 33 |
| Cellular Function and Maintenance             | function of leukocytes                  | 1.73E-10 | CASP1,CCR5,CD44,CD47,CEBPB (includes EG:1051),CHI3L1,CIITA,CXCR4,FPR2 (includes EG:100426968),FUT4,PADI4,PLAT,RGS1,SAMSN1,SELP,SIRPA,SLPI,SPP1 (includes EG:100359743),TNFRSF18                                                                           | 19 |

|                                                |                                             |          |                                                                                                                                                                                                                           |    |
|------------------------------------------------|---------------------------------------------|----------|---------------------------------------------------------------------------------------------------------------------------------------------------------------------------------------------------------------------------|----|
| Tissue Development                             | proliferation of vascular endothelial cells | 2.20E-10 | CDKN1A,CXCL1,DAB2,FPR2 (includes EG:100426968),HIF1A,OSM,PTPN1,S100A8,SAA1,SEMA3F                                                                                                                                         | 10 |
| Cardiovascular System Development and Function | proliferation of vascular endothelial cells | 2.20E-10 | CDKN1A,CXCL1,DAB2,FPR2 (includes EG:100426968),HIF1A,OSM,PTPN1,S100A8,SAA1,SEMA3F                                                                                                                                         | 10 |
| Cellular Development                           | proliferation of vascular endothelial cells | 2.20E-10 | CDKN1A,CXCL1,DAB2,FPR2 (includes EG:100426968),HIF1A,OSM,PTPN1,S100A8,SAA1,SEMA3F                                                                                                                                         | 10 |
| Cellular Growth and Proliferation              | proliferation of vascular endothelial cells | 2.20E-10 | CDKN1A,CXCL1,DAB2,FPR2 (includes EG:100426968),HIF1A,OSM,PTPN1,S100A8,SAA1,SEMA3F                                                                                                                                         | 10 |
| Organismal Development                         | proliferation of vascular endothelial cells | 2.20E-10 | CDKN1A,CXCL1,DAB2,FPR2 (includes EG:100426968),HIF1A,OSM,PTPN1,S100A8,SAA1,SEMA3F                                                                                                                                         | 10 |
| Cell Death and Survival                        | cell death of immune cells                  | 3.39E-10 | CASP1,CCR5,CD44,CD47,CDKN1A,CEBPB (includes EG:1051),CHI3L1,CIITA,CORO1A,CXCL1,CXCR4,HIF1A,IER3,INHBA,LRIG1,SLPI,SOAT1,SPP1 (includes EG:100359743),THBS2,TNFRSF18                                                        | 20 |
| Cellular Growth and Proliferation              | formation of cells                          | 5.23E-10 | CCR5,CD44,CD47,CDKN1A,CEBPB (includes EG:1051),CIITA,CXCR4,HIF1A,INHBA,INSL3,S100A8,SEMA3F,SIRPA,SOAT1,SOCS3                                                                                                              | 15 |
| Cellular Movement                              | homing of mononuclear leukocytes            | 6.64E-10 | CCL7,CCR5,CD44,CXCR4,FPR2 (includes EG:100426968),INHBA,RAP1GAP,RGS1,SAA1,SOCS3,SPP1 (includes EG:100359743),THBS2                                                                                                        | 12 |
| Hematological System Development and Function  | homing of mononuclear leukocytes            | 6.64E-10 | CCL7,CCR5,CD44,CXCR4,FPR2 (includes EG:100426968),INHBA,RAP1GAP,RGS1,SAA1,SOCS3,SPP1 (includes EG:100359743),THBS2                                                                                                        | 12 |
| Immune Cell Trafficking                        | homing of mononuclear leukocytes            | 6.64E-10 | CCL7,CCR5,CD44,CXCR4,FPR2 (includes EG:100426968),INHBA,RAP1GAP,RGS1,SAA1,SOCS3,SPP1 (includes EG:100359743),THBS2                                                                                                        | 12 |
| Connective Tissue Disorders                    | Rheumatic Disease                           | 7.33E-10 | ADAMTS4,CASP1,CCL7,CCR5,CD44,CDKN1A,CEBPB (includes EG:1051),CFB,CHI3L1,CIITA,CXCL1,CXCR4,FPR2 (includes EG:100426968),FSTL1,OSM,PADI4,PLAT,RGS1,S100A8,SAA1,SELP,SIRPA,SOCS3,SPP1 (includes EG:100359743),THBS2,TNFRSF18 | 26 |
| Inflammatory Disease                           | Rheumatic Disease                           | 7.33E-10 | ADAMTS4,CASP1,CCL7,CCR5,CD44,CDKN1A,CEBPB (includes EG:1051),CFB,CHI3L1,CIITA,CXCL1,CXCR4,FPR2 (includes EG:100426968),FSTL1,OSM,PADI4,PLAT,RGS1,S100A8,SAA1,SELP,SIRPA,SOCS3,SPP1 (includes EG:100359743),THBS2,TNFRSF18 | 26 |
| Skeletal and Muscular Disorders                | Rheumatic Disease                           | 7.33E-10 | ADAMTS4,CASP1,CCL7,CCR5,CD44,CDKN1A,CEBPB (includes EG:1051),CFB,CHI3L1,CIITA,CXCL1,CXCR4,FPR2 (includes EG:100426968),FSTL1,OSM,PADI4,PLAT,RGS1,S100A8,SAA1,SELP,SIRPA,SOCS3,SPP1 (includes EG:100359743),THBS2,TNFRSF18 | 26 |



|                                                      |                                           |          |                                                                                                                                                                       |    |
|------------------------------------------------------|-------------------------------------------|----------|-----------------------------------------------------------------------------------------------------------------------------------------------------------------------|----|
| Hematological System<br>Development and<br>Function  | quantity of mononuclear leukocytes        | 7.92E-10 | BST2,CCL7,CCR5,CD47,CDKN1A,CEBPB (includes EG:1051),CHI3L1,CIITA,CORO1A,CXCR4,FUT4,HIF1A,INHBA,OSM,RGS1,SAMSN1,SELP,SIRPA,SOCS3,SPP1 (includes EG:100359743),TGFB1    | 21 |
| Tissue Morphology                                    | quantity of mononuclear leukocytes        | 7.92E-10 | BST2,CCL7,CCR5,CD47,CDKN1A,CEBPB (includes EG:1051),CHI3L1,CIITA,CORO1A,CXCR4,FUT4,HIF1A,INHBA,OSM,RGS1,SAMSN1,SELP,SIRPA,SOCS3,SPP1 (includes EG:100359743),TGFB1    | 21 |
| Cardiovascular System<br>Development and<br>Function | vasculogenesis                            | 9.61E-10 | CCL7,CCR5,CD44,CDKN1A,CXCL1,CXCR4,DAB2,FPR2 (includes EG:100426968),HIF1A,INHBA,OSM,PLAT,PTPN1,S100A8,SAA1,SELP,SEMA3F,SPP1 (includes EG:100359743),TGFB1,THBS2       | 20 |
| Organismal<br>Development                            | vasculogenesis                            | 9.61E-10 | CCL7,CCR5,CD44,CDKN1A,CXCL1,CXCR4,FPR2 (includes EG:100426968),HIF1A,INHBA,OSM,PLAT,PTPN1,S100A8,SAA1,SELP,SEMA3F,SPP1 (includes EG:100359743),TGFB1,THBS2            | 20 |
| Cellular Movement                                    | cell movement of antigen presenting cells | 1.22E-09 | CASP1,CCL7,CCR5,CD44,CDKN1A,CXCL1,CXCR4,FPR2 (includes EG:100426968),HIF1A,SAA1,SELP,SIRPA,SPP1 (includes EG:100359743),THBS2                                         | 14 |
| Hematological System<br>Development and<br>Function  | cell movement of antigen presenting cells | 1.22E-09 | CASP1,CCL7,CCR5,CD44,CDKN1A,CXCL1,CXCR4,FPR2 (includes EG:100426968),HIF1A,SAA1,SELP,SIRPA,SPP1 (includes EG:100359743),THBS2                                         | 14 |
| Immune Cell<br>Trafficking                           | cell movement of antigen presenting cells | 1.22E-09 | CASP1,CD44,CFB,FPR2 (includes EG:100426968),FUT4,PLAT,SELP,SOCS3,SPP1 (includes EG:100359743),TNFRSF18                                                                | 14 |
| Cellular Movement                                    | infiltration by neutrophils               | 1.24E-09 | CASP1,CD44,CFB,FPR2 (includes EG:100426968),FUT4,PLAT,SELP,SOCS3,SPP1 (includes EG:100359743),TNFRSF18                                                                | 10 |
| Hematological System<br>Development and<br>Function  | infiltration by neutrophils               | 1.24E-09 | CASP1,CD44,CFB,FPR2 (includes EG:100426968),FUT4,PLAT,SELP,SOCS3,SPP1 (includes EG:100359743),TNFRSF18                                                                | 10 |
| Immune Cell<br>Trafficking                           | infiltration by neutrophils               | 1.24E-09 | CASP1,CD44,CFB,FPR2 (includes EG:100426968),FUT4,PLAT,SELP,SOCS3,SPP1 (includes EG:100359743),TNFRSF18                                                                | 10 |
| Inflammatory<br>Response                             | infiltration by neutrophils               | 1.24E-09 | CASP1,CD44,CFB,FPR2 (includes EG:100426968),FUT4,PLAT,SELP,SOCS3,SPP1 (includes EG:100359743),TNFRSF18                                                                | 10 |
| Cardiovascular System<br>Development and<br>Function | development of blood vessel               | 1.43E-09 | CCL7,CCR5,CD44,CDKN1A,CXCL1,CXCR4,DAB2,FPR2 (includes EG:100426968),HIF1A,INHBA,OSM,PLAT,PTPN1,S100A8,SAA1,SELP,SEMA3F,SOCS3,SPP1 (includes EG:100359743),TGFB1,THBS2 | 21 |
| Organismal<br>Development                            | development of blood vessel               | 1.43E-09 | CASP1,CCR5,CD44,CD47,CDKN1A,CHI3L1,CIITA,CORO1A,CXCR4,IER3,SPP1 (includes EG:100359743),TGFB1,THBS2                                                                   | 21 |
| Cell Death and Survival                              | apoptosis of T lymphocytes                | 1.57E-09 | EG:100359743),THBS2,TNFRSF18                                                                                                                                          | 13 |

|                                               |                                      |          |                                                                                                                                                                                                               |    |
|-----------------------------------------------|--------------------------------------|----------|---------------------------------------------------------------------------------------------------------------------------------------------------------------------------------------------------------------|----|
| Cellular Movement                             | infiltration                         | 1.69E-09 | CASP1,CCR5,CD44,CFB,CIITA,FPR2 (includes EG:100426968),FUT4,HIF1A,OSM,PLAT,SELP,SOCS3,SPP1 (includes EG:100359743),THBS2,TNFRSF18                                                                             | 15 |
| Cellular Movement                             | recruitment of cells                 | 1.86E-09 | CASP1,CCL7,CCR5,CD44,CD47,CHI3L1,CXCL1,CXCR4,HIF1A,SELP,SLC11A1,SLPI,SPP1 (includes EG:100359743),THBS2                                                                                                       | 14 |
| Cell-To-Cell Signaling and Interaction        | recruitment of cells                 | 1.86E-09 | CASP1,CCL7,CCR5,CD44,CD47,CHI3L1,CXCL1,CXCR4,HIF1A,SELP,SLC11A1,SLPI,SPP1 (includes EG:100359743),THBS2                                                                                                       | 14 |
| Cellular Movement                             | chemotaxis of mononuclear leukocytes | 1.88E-09 | CASP1,CCL7,CCR5,CD44,CD47,CHI3L1,CXCL1,CXCR4,HIF1A,SELP,SLC11A1,SLPI,SPP1 (includes EG:100359743),THBS2                                                                                                       | 11 |
| Hematological System Development and Function | chemotaxis of mononuclear leukocytes | 1.88E-09 | CASP1,CCL7,CCR5,CD44,CD47,CHI3L1,CXCL1,CXCR4,HIF1A,SELP,SLC11A1,SLPI,SPP1 (includes EG:100359743),THBS2                                                                                                       | 11 |
| Immune Cell Trafficking                       | chemotaxis of mononuclear leukocytes | 1.88E-09 | CASP1,CCL7,CCR5,CD44,CD47,CHI3L1,CXCL1,CXCR4,HIF1A,SELP,SLC11A1,SLPI,SPP1 (includes EG:100359743),THBS2                                                                                                       | 11 |
| Inflammatory Response                         | chemotaxis of mononuclear leukocytes | 1.88E-09 | CASP1,CCL7,CCR5,CD44,CD47,CHI3L1,CXCL1,CXCR4,HIF1A,SELP,SLC11A1,SLPI,SPP1 (includes EG:100359743),THBS2                                                                                                       | 11 |
| Connective Tissue Disorders                   | arthritis                            | 1.95E-09 | ADAMTS4,CASP1,CCL7,CCR5,CD44,CDKN1A,CEBPB (includes EG:1051),CFB,CHI3L1,CIITA,CXCL1,CXCR4,FPR2 (includes EG:100426968),FSTL1,OSM,PADI4,PLAT,S100A8,SA1,SELP,SOCS3,SPP1 (includes EG:100359743),THBS2,TNFRSF18 | 24 |
| Inflammatory Disease                          | arthritis                            | 1.95E-09 | ADAMTS4,CASP1,CCL7,CCR5,CD44,CDKN1A,CEBPB (includes EG:1051),CFB,CHI3L1,CIITA,CXCL1,CXCR4,FPR2 (includes EG:100426968),FSTL1,OSM,PADI4,PLAT,S100A8,SA1,SELP,SOCS3,SPP1 (includes EG:100359743),THBS2,TNFRSF18 | 24 |
| Skeletal and Muscular Disorders               | arthritis                            | 1.95E-09 | ADAMTS4,CASP1,CCL7,CCR5,CD44,CDKN1A,CEBPB (includes EG:1051),CFB,CHI3L1,CIITA,CXCL1,CXCR4,FPR2 (includes EG:100426968),FSTL1,OSM,PADI4,PLAT,S100A8,SA1,SELP,SOCS3,SPP1 (includes EG:100359743),THBS2,TNFRSF18 | 24 |
| Cellular Movement                             | infiltration of granulocytes         | 2.23E-09 | CASP1,CD44,CFB,FPR2 (includes EG:100426968),FUT4,OSM,PLAT,SELP,SOCS3,SPP1 (includes EG:100359743),TNFRSF18                                                                                                    | 11 |
| Hematological System Development and Function | infiltration of granulocytes         | 2.23E-09 | CASP1,CD44,CFB,FPR2 (includes EG:100426968),FUT4,OSM,PLAT,SELP,SOCS3,SPP1 (includes EG:100359743),TNFRSF18                                                                                                    | 11 |
| Immune Cell Trafficking                       | infiltration of granulocytes         | 2.23E-09 | CASP1,CD44,CFB,FPR2 (includes EG:100426968),FUT4,OSM,PLAT,SELP,SOCS3,SPP1 (includes EG:100359743),TNFRSF18                                                                                                    | 11 |
| Tissue Development                            | development of endothelial tissue    | 2.42E-09 | CD44,CDKN1A,CXCL1,DAB2,FPR2 (includes EG:100426968),HIF1A,INHBA,OSM,PLAT,PTPN1,S100A8,SA1,SEMA3F,SPP1 (includes EG:100359743)                                                                                 | 14 |

|                                                      |                                   |          |                                                                                                                                                                                                                                                                                                   |    |
|------------------------------------------------------|-----------------------------------|----------|---------------------------------------------------------------------------------------------------------------------------------------------------------------------------------------------------------------------------------------------------------------------------------------------------|----|
| Cardiovascular System<br>Development and<br>Function | development of endothelial tissue | 2.42E-09 | CD44,CDKN1A,CXCL1,DAB2,FPR2 (includes EG:100426968),HIF1A,INHBA,OSM,PLAT,PTPN1,S100A8,SAA1,SEMA3F,SPP1 (includes EG:100359743) CCL7,CCR5,CD44,CD47,CDKN1A,CHI3L1,CORO1A,CXCL1,FPR2 (includes EG:100426968),HIF1A,MGST1,OSM,S100A8,SAMSN1,SIRPA,SLC11A1,SLPI,SPP1 (includes EG:100359743),TNFRSF18 | 14 |
| Hematological System<br>Development and<br>Function  | activation of leukocytes          | 2.51E-09 | EG:100426968),HIF1A,MGST1,OSM,S100A8,SAMSN1,SIRPA,SLC11A1,SLPI,SPP1 (includes EG:100359743),TNFRSF18                                                                                                                                                                                              | 19 |
| Immune Cell<br>Trafficking                           | activation of leukocytes          | 2.51E-09 | EG:100426968),HIF1A,MGST1,OSM,S100A8,SAMSN1,SIRPA,SLC11A1,SLPI,SPP1 (includes EG:100359743),TNFRSF18                                                                                                                                                                                              | 19 |
| Inflammatory<br>Response                             | activation of leukocytes          | 2.51E-09 | EG:100426968),HIF1A,MGST1,OSM,S100A8,SAMSN1,SIRPA,SLC11A1,SLPI,SPP1 (includes EG:100359743),TNFRSF18                                                                                                                                                                                              | 19 |
| Cell-To-Cell Signaling<br>and Interaction            | activation of leukocytes          | 2.51E-09 | EG:100426968),HIF1A,MGST1,OSM,S100A8,SAMSN1,SIRPA,SLC11A1,SLPI,SPP1 (includes EG:100359743),TNFRSF18                                                                                                                                                                                              | 19 |
| Cellular Movement                                    | migration of granulocytes         | 2.55E-09 | CD44,CD47,CXCL1,S100A8,SAA1,SELP,SIRPA,SLPI,SOCS3,SPP1 (includes EG:100359743)                                                                                                                                                                                                                    | 10 |
| Hematological System<br>Development and<br>Function  | migration of granulocytes         | 2.55E-09 | CD44,CD47,CXCL1,S100A8,SAA1,SELP,SIRPA,SLPI,SOCS3,SPP1 (includes EG:100359743)                                                                                                                                                                                                                    | 10 |
| Immune Cell<br>Trafficking                           | migration of granulocytes         | 2.55E-09 | CD44,CD47,CXCL1,S100A8,SAA1,SELP,SIRPA,SLPI,SOCS3,SPP1 (includes EG:100359743)                                                                                                                                                                                                                    | 10 |
| Cellular Movement                                    | migration of neutrophils          | 2.64E-09 | CD44,CD47,CXCL1,S100A8,SAA1,SELP,SLPI,SOCS3,SP P1 (includes EG:100359743)                                                                                                                                                                                                                         | 9  |
| Hematological System<br>Development and<br>Function  | migration of neutrophils          | 2.64E-09 | CD44,CD47,CXCL1,S100A8,SAA1,SELP,SLPI,SOCS3,SP P1 (includes EG:100359743)                                                                                                                                                                                                                         | 9  |
| Immune Cell<br>Trafficking                           | migration of neutrophils          | 2.64E-09 | CD44,CD47,CXCL1,S100A8,SAA1,SELP,SLPI,SOCS3,SP P1 (includes EG:100359743)                                                                                                                                                                                                                         | 9  |
| Inflammatory<br>Response                             | migration of neutrophils          | 2.64E-09 | CD44,CD47,CXCL1,S100A8,SAA1,SELP,SLPI,SOCS3,SP P1 (includes EG:100359743)                                                                                                                                                                                                                         | 9  |
| Cellular Movement                                    | cell movement of macrophages      | 2.78E-09 | CASP1,CCR5,CD44,CDKN1A,CXCL1,CXCR4,FPR2 (includes EG:100426968),HIF1A,SAA1,SELP,SPP1 (includes EG:100359743),THBS2                                                                                                                                                                                | 12 |
| Hematological System<br>Development and<br>Function  | cell movement of macrophages      | 2.78E-09 | CASP1,CCR5,CD44,CDKN1A,CXCL1,CXCR4,FPR2 (includes EG:100426968),HIF1A,SAA1,SELP,SPP1 (includes EG:100359743),THBS2                                                                                                                                                                                | 12 |
| Immune Cell<br>Trafficking                           | cell movement of macrophages      | 2.78E-09 | CASP1,CCR5,CD44,CDKN1A,CXCL1,CXCR4,FPR2 (includes EG:100426968),HIF1A,SAA1,SELP,SPP1 (includes EG:100359743),THBS2                                                                                                                                                                                | 12 |
| Inflammatory<br>Response                             | cell movement of macrophages      | 2.78E-09 | CASP1,CCR5,CD44,CDKN1A,CXCL1,CXCR4,FPR2 (includes EG:100426968),HIF1A,SAA1,SELP,SPP1 (includes EG:100359743),THBS2                                                                                                                                                                                | 12 |

|                                               |                            |          |                                                                                                                                       |    |
|-----------------------------------------------|----------------------------|----------|---------------------------------------------------------------------------------------------------------------------------------------|----|
| Cell Death and Survival                       | apoptosis of lymphocytes   | 2.80E-09 | CASP1,CCR5,CD44,CD47,CDKN1A,CHI3L1,CIITA,CORO1A,CXCR4,IER3,LRIG1,SPP1 (includes EG:100359743),THBS2,TNFRSF18                          | 14 |
| Hematological System Development and Function | adhesion of lymphocytes    | 3.14E-09 | CD44,CD47,FUT4,OSM,RAP1GAP,RGS1,SELP,SPP1 (includes EG:100359743),THBS2                                                               | 9  |
| Immune Cell Trafficking                       | adhesion of lymphocytes    | 3.14E-09 | CD44,CD47,FUT4,OSM,RAP1GAP,RGS1,SELP,SPP1 (includes EG:100359743),THBS2                                                               | 9  |
| Cell-To-Cell Signaling and Interaction        | adhesion of lymphocytes    | 3.14E-09 | CD44,CD47,FUT4,OSM,RAP1GAP,RGS1,SELP,SPP1 (includes EG:100359743),THBS2                                                               | 9  |
| Tissue Development                            | adhesion of lymphocytes    | 3.14E-09 | CD44,CD47,FUT4,OSM,RAP1GAP,RGS1,SELP,SPP1 (includes EG:100359743),THBS2                                                               | 9  |
| Cellular Movement                             | homing of lymphocytes      | 3.82E-09 | CCL7,CCR5,CD44,CXCR4,RAP1GAP,RGS1,SAA1,SOCS3,SPP1 (includes EG:100359743),THBS2                                                       | 10 |
| Hematological System Development and Function | homing of lymphocytes      | 3.82E-09 | CCL7,CCR5,CD44,CXCR4,RAP1GAP,RGS1,SAA1,SOCS3,SPP1 (includes EG:100359743),THBS2                                                       | 10 |
| Immune Cell Trafficking                       | homing of lymphocytes      | 3.82E-09 | CCL7,CCR5,CD44,CXCR4,RAP1GAP,RGS1,SAA1,SOCS3,SPP1 (includes EG:100359743),THBS2                                                       | 10 |
| Cellular Movement                             | recruitment of leukocytes  | 4.63E-09 | CASP1,CCL7,CCR5,CD44,CD47,CHI3L1,CXCL1,CXCR4,HIF1A,SELP,SLPI,SPP1 (includes EG:100359743),THBS2                                       | 13 |
| Hematological System Development and Function | recruitment of leukocytes  | 4.63E-09 | CASP1,CCL7,CCR5,CD44,CD47,CHI3L1,CXCL1,CXCR4,HIF1A,SELP,SLPI,SPP1 (includes EG:100359743),THBS2                                       | 13 |
| Immune Cell Trafficking                       | recruitment of leukocytes  | 4.63E-09 | CASP1,CCL7,CCR5,CD44,CD47,CHI3L1,CXCL1,CXCR4,HIF1A,SELP,SLPI,SPP1 (includes EG:100359743),THBS2                                       | 13 |
| Cell-To-Cell Signaling and Interaction        | recruitment of leukocytes  | 4.63E-09 | CASP1,CCL7,CCR5,CD44,CD47,CHI3L1,CXCL1,CXCR4,HIF1A,SELP,SLPI,SPP1 (includes EG:100359743),THBS2                                       | 13 |
| Cellular Movement                             | infiltration of leukocytes | 5.67E-09 | CASP1,CCR5,CD44,CFB,CIITA,FPR2 (includes EG:100426968),FUT4,HIF1A,OSM,PLAT,SELP,SOCS3,SPP1 (includes EG:100359743),TNFRSF18           | 14 |
| Hematological System Development and Function | infiltration of leukocytes | 5.67E-09 | CASP1,CCR5,CD44,CFB,CIITA,FPR2 (includes EG:100426968),FUT4,HIF1A,OSM,PLAT,SELP,SOCS3,SPP1 (includes EG:100359743),TNFRSF18           | 14 |
| Immune Cell Trafficking                       | infiltration of leukocytes | 5.67E-09 | CASP1,CCR5,CD44,CFB,CIITA,FPR2 (includes EG:100426968),FUT4,HIF1A,OSM,PLAT,SELP,SOCS3,SPP1 (includes EG:100359743),TNFRSF18           | 14 |
| Cellular Movement                             | invasion of cells          | 6.51E-09 | CD44,CD53,CHI3L1,CXCL1,CXCR4,DAB2,FSTL1,FXYS5,HIF1A,IER3,INHBA,LRIG1,OSM,PLAT,RAP1GAP,SEMA3F,SPP1 (includes EG:100359743),TGFB1,THBS2 | 19 |
| Tissue Development                            | aggregation of cells       | 6.81E-09 | CD44,CD47,CDKN1A,CP,DAB2,HIF1A,PLAT,PLEK,PTPN1,SELP,SIRPA,THBS2,TNFRSF18                                                              | 13 |
| Infectious Disease                            | infection of mammalia      | 7.18E-09 | BST2,CASP1,CCR5,CD44,CD47,CEBPB (includes EG:1051),CIITA,CXCR4,FUT4,PADI4,SELP,SLC11A1,SLPI,SPP1 (includes EG:100359743)              | 14 |
| Cellular Movement                             | chemotaxis of neutrophils  | 8.17E-09 | CASP1,CCL7,CD47,CORO1A,CXCL1,FPR2 (includes EG:100426968),S100A8,SELP,SLPI,SPP1 (includes EG:100359743)                               | 10 |

|                                                     |                           |          |                                                                                                                                                                                                                                                                                                    |    |
|-----------------------------------------------------|---------------------------|----------|----------------------------------------------------------------------------------------------------------------------------------------------------------------------------------------------------------------------------------------------------------------------------------------------------|----|
| Hematological System<br>Development and<br>Function | chemotaxis of neutrophils | 8.17E-09 | CASP1,CCL7,CD47,CORO1A,CXCL1,FPR2 (includes EG:100426968),S100A8,SELP,SLPI,SPP1 (includes EG:100359743)                                                                                                                                                                                            | 10 |
| Immune Cell<br>Trafficking                          | chemotaxis of neutrophils | 8.17E-09 | CASP1,CCL7,CD47,CORO1A,CXCL1,FPR2 (includes EG:100426968),S100A8,SELP,SLPI,SPP1 (includes EG:100359743)                                                                                                                                                                                            | 10 |
| Inflammatory<br>Response                            | chemotaxis of neutrophils | 8.17E-09 | CASP1,CCL7,CD47,CORO1A,CXCL1,FPR2 (includes EG:100426968),S100A8,SELP,SLPI,SPP1 (includes EG:100359743)                                                                                                                                                                                            | 10 |
| Cellular Movement                                   | chemotaxis of lymphocytes | 8.21E-09 | CCL7,CCR5,CXCR4,RAP1GAP,RGS1,SAA1,SOCS3,SPP1 (includes EG:100359743),THBS2                                                                                                                                                                                                                         | 9  |
| Hematological System<br>Development and<br>Function | chemotaxis of lymphocytes | 8.21E-09 | CCL7,CCR5,CXCR4,RAP1GAP,RGS1,SAA1,SOCS3,SPP1 (includes EG:100359743),THBS2                                                                                                                                                                                                                         | 9  |
| Immune Cell<br>Trafficking                          | chemotaxis of lymphocytes | 8.21E-09 | CCL7,CCR5,CXCR4,RAP1GAP,RGS1,SAA1,SOCS3,SPP1 (includes EG:100359743),THBS2                                                                                                                                                                                                                         | 9  |
| Inflammatory<br>Response                            | chemotaxis of lymphocytes | 8.21E-09 | CCL7,CCR5,CXCR4,RAP1GAP,RGS1,SAA1,SOCS3,SPP1 (includes EG:100359743),THBS2                                                                                                                                                                                                                         | 9  |
| Cell Death and Survival                             | cell death                | 9.80E-09 | CASP1,CCL7,CCR5,CD44,CD47,CD53,CDKN1A,CEBPB (includes EG:1051),CHI3L1,CIITA,CORO1A,CP,CXCL1,CXCR4,DA B2,DUSP6,FSTL1,FUT4,GDA,HIF1A,IER3,INHBA,INSL3,LRIG1,MSN,OSM,PADI4,PLAT,PTPN1,RAP1GAP,S100 A8,SAA1,SELP,SEMA3F,SIRPA,SLPI,SOAT1,SOCS3,SPP 1 (includes EG:100359743),SRGN,TGFBI,THBS2,TNFRSF18 | 43 |
| Cell Death and Survival                             | apoptosis                 | 9.93E-09 | CASP1,CCR5,CD44,CD47,CD53,CDKN1A,CEBPB (includes EG:1051),CHI3L1,CIITA,CORO1A,CXCL1,CXCR4,DAB2,DUSP6,FSTL1,FUT4,HIF1A,IER3,INHBA,INSL3,LRIG1,MSN,OSM,PADI4,PLAT,PTPN1,S100A8,SAA1,SEMA3F,SIRPA,SLPI,SOAT1,SOCS3,SPP1 (includes EG:100359743),SRGN,TGFBI,THBS2,TNFRSF18                             | 38 |
| Cellular Movement                                   | recruitment of phagocytes | 1.15E-08 | CASP1,CCL7,CCR5,CD44,CD47,CHI3L1,CXCL1,SELP,SLPI,SPP1 (includes EG:100359743),THBS2                                                                                                                                                                                                                | 11 |
| Hematological System<br>Development and<br>Function | recruitment of phagocytes | 1.15E-08 | CASP1,CCL7,CCR5,CD44,CD47,CHI3L1,CXCL1,SELP,SLPI,SPP1 (includes EG:100359743),THBS2                                                                                                                                                                                                                | 11 |
| Immune Cell<br>Trafficking                          | recruitment of phagocytes | 1.15E-08 | CASP1,CCL7,CCR5,CD44,CD47,CHI3L1,CXCL1,SELP,SLPI,SPP1 (includes EG:100359743),THBS2                                                                                                                                                                                                                | 11 |
| Inflammatory<br>Response                            | recruitment of phagocytes | 1.15E-08 | CASP1,CCL7,CCR5,CD44,CD47,CHI3L1,CXCL1,SELP,SLPI,SPP1 (includes EG:100359743),THBS2                                                                                                                                                                                                                | 11 |
| Cell-To-Cell Signaling<br>and Interaction           | recruitment of phagocytes | 1.15E-08 | CASP1,CCL7,CCR5,CD44,CD47,CHI3L1,CXCL1,SELP,SLPI,SPP1 (includes EG:100359743),THBS2                                                                                                                                                                                                                | 11 |
| Hematological System<br>Development and<br>Function | quantity of lymphocytes   | 1.69E-08 | BST2,CCR5,CD47,CDKN1A,CEBPB (includes EG:1051),CHI3L1,CIITA,CORO1A,CXCR4,HIF1A,INHBA,OSM,RGS1,SAMSN1,SELP,SIRPA,SOCS3,SPP1 (includes EG:100359743),TGFBI                                                                                                                                           | 19 |

|                                                |                                    |          |                                                                                                                                                                                                                                                                                     |    |
|------------------------------------------------|------------------------------------|----------|-------------------------------------------------------------------------------------------------------------------------------------------------------------------------------------------------------------------------------------------------------------------------------------|----|
| Tissue Morphology                              | quantity of lymphocytes            | 1.69E-08 | BST2,CCR5,CD47,CDKN1A,CEBPB (includes EG:1051),CHI3L1,CIITA,CORO1A,CXCR4,HIF1A,INHBA,OSM,RGS1,SAMSN1,SELP,SIRPA,SOCS3,SPP1 (includes EG:100359743),TGFB1                                                                                                                            | 19 |
| Tissue Development                             | development of epithelial tissue   | 1.84E-08 | CD44,CDKN1A,CXCL1,CXCR4,DAB2,FPR2 (includes EG:100426968),HIF1A,INHBA,OSM,PLAT,PTPN1,S100A8,SAA1,SEMA3F,SPP1 (includes EG:100359743)                                                                                                                                                | 15 |
| Cancer                                         | epithelial tumor                   | 1.86E-08 | ADAMTS4,APOBEC1,BST2,CASP1,CCL7,CCR5,CD44,CDKN1A,CEBPB (includes EG:1051),CFB,CHI3L1,CHRN1,CP,CXCL1,CXCR4,DAB2,DUSP6,FUT4,GPRC5A,HIF1A,IER3,IFITM2,INHBA,LRIG1,OSM,OSMR,PLAT,PTPN1,RAP1GAP,S100A8,SAA1,SELP,SEMA3F,SLPI,SOCS3,SPP1 (includes EG:100359743),TGFB1,THBS2,TMC5,TNFAIP2 | 40 |
| Cell Death and Survival                        | necrosis                           | 2.17E-08 | CASP1,CCR5,CD44,CD47,CDKN1A,CEBPB (includes EG:1051),CHI3L1,CIITA,CORO1A,CXCL1,CXCR4,DAB2,DUSP6,FSTL1,GDA,HIF1A,IER3,INHBA,LRIG1,MSN,OSM,PADI4,PLAT,PTPN1,RAP1GAP,S100A8,SAA1,SELP,SEMA3F,SIRPA,SLPI,SOAT1,SOCS3,SPP1 (includes EG:100359743),THBS2,TNFRSF18                        | 36 |
| Tissue Development                             | proliferation of endothelial cells | 2.28E-08 | CD44,CDKN1A,CXCL1,DAB2,FPR2 (includes EG:100426968),HIF1A,INHBA,OSM,PTPN1,S100A8,SAA1,SEMA3F                                                                                                                                                                                        | 12 |
| Cardiovascular System Development and Function | proliferation of endothelial cells | 2.28E-08 | CD44,CDKN1A,CXCL1,DAB2,FPR2 (includes EG:100426968),HIF1A,INHBA,OSM,PTPN1,S100A8,SAA1,SEMA3F                                                                                                                                                                                        | 12 |
| Cellular Development                           | proliferation of endothelial cells | 2.28E-08 | CD44,CDKN1A,CXCL1,DAB2,FPR2 (includes EG:100426968),HIF1A,INHBA,OSM,PTPN1,S100A8,SAA1,SEMA3F                                                                                                                                                                                        | 12 |
| Cellular Growth and Proliferation              | proliferation of endothelial cells | 2.28E-08 | CD44,CDKN1A,CXCL1,DAB2,FPR2 (includes EG:100426968),HIF1A,INHBA,OSM,PTPN1,S100A8,SAA1,SEMA3F                                                                                                                                                                                        | 12 |
| Organismal Development                         | proliferation of endothelial cells | 2.28E-08 | CD44,CDKN1A,CXCL1,DAB2,FPR2 (includes EG:100426968),HIF1A,INHBA,OSM,PTPN1,S100A8,SAA1,SEMA3F                                                                                                                                                                                        | 12 |
| Immunological Disease                          | systemic autoimmune syndrome       | 2.43E-08 | ADAMTS4,CASP1,CCL7,CCR5,CD44,CD47,CEBPB (includes EG:1051),CFB,CHI3L1,CIITA,CXCL1,CXCR4,FPR2 (includes EG:100426968),OSM,PADI4,S100A8,SAA1,SELP,SIRPA,SOCS3,SPP1 (includes EG:100359743),TNFRSF18                                                                                   | 22 |
| Hematological System Development and Function  | quantity of phagocytes             | 2.54E-08 | CCL7,CD47,CDKN1A,CIITA,FPR2 (includes EG:100426968),FUT4,PLAT,S100A8,SELP,SIRPA,SOAT1,SOCS3,SPP1 (includes EG:100359743),SRGN                                                                                                                                                       | 14 |
| Inflammatory Response                          | quantity of phagocytes             | 2.54E-08 | CCL7,CD47,CDKN1A,CIITA,FPR2 (includes EG:100426968),FUT4,PLAT,S100A8,SELP,SIRPA,SOAT1,SOCS3,SPP1 (includes EG:100359743),SRGN                                                                                                                                                       | 14 |

|                                                |                                        |          |                                                                                                                                                                                                                                                                                                                                      |    |
|------------------------------------------------|----------------------------------------|----------|--------------------------------------------------------------------------------------------------------------------------------------------------------------------------------------------------------------------------------------------------------------------------------------------------------------------------------------|----|
| Tissue Morphology                              | quantity of phagocytes                 | 2.54E-08 | CCL7,CD47,CDKN1A,CIITA,FPR2 (includes EG:100426968),FUT4,PLAT,S100A8,SELP,SIRPA,SOAT1,SOCS3,SPP1 (includes EG:100359743),SRGN                                                                                                                                                                                                        | 14 |
| Cellular Growth and Proliferation              | proliferation of synovial cells        | 2.60E-08 | CD44,CDKN1A,CIITA,OSM,SAA1,SOCS3                                                                                                                                                                                                                                                                                                     | 6  |
| Connective Tissue Development and Function     | proliferation of synovial cells        | 2.60E-08 | CD44,CDKN1A,CIITA,OSM,SAA1,SOCS3                                                                                                                                                                                                                                                                                                     | 6  |
| Cellular Movement                              | migration of tumor cell lines          | 2.79E-08 | CCL7,CD44,CD47,CXCR4,DAB2,MSN,OSM,RAP1GAP,RGS1,S100A8,SEMA3F,SIRPA,SOCS3,SPP1 (includes EG:100359743),TGFB1,THBS2                                                                                                                                                                                                                    | 16 |
| Cellular Movement                              | migration of mononuclear leukocytes    | 3.22E-08 | CCL7,CCR5,CD44,CD47,CXCR4,FUT4,RAP1GAP,RGS1,SELP,SIRPA,SOCS3,SPP1 (includes EG:100359743),THBS2                                                                                                                                                                                                                                      | 13 |
| Hematological System Development and Function  | migration of mononuclear leukocytes    | 3.22E-08 | CCL7,CCR5,CD44,CD47,CXCR4,FUT4,RAP1GAP,RGS1,SELP,SIRPA,SOCS3,SPP1 (includes EG:100359743),THBS2                                                                                                                                                                                                                                      | 13 |
| Immune Cell Trafficking                        | migration of mononuclear leukocytes    | 3.22E-08 | CCL7,CCR5,CD44,CD47,CXCR4,FUT4,RAP1GAP,RGS1,SELP,SIRPA,SOCS3,SPP1 (includes EG:100359743),THBS2                                                                                                                                                                                                                                      | 13 |
| Cardiovascular Disease                         | vascular disease                       | 3.72E-08 | CASP1,CCR5,CD44,CD47,CDKN1A,CFB,CHI3L1,CHRN B1,CXCR4,HIF1A,LRIG1,PLAT,S100A8,SELP,SLC16A6,SOAT1,SOCS3,SPP1 (includes EG:100359743)                                                                                                                                                                                                   | 18 |
| Cellular Growth and Proliferation              | proliferation of cells                 | 4.12E-08 | APOBEC1,BST2,CASP1,CCR5,CD44,CD47,CDKN1A,CEBPB (includes EG:1051),CFB,CHI3L1,CIITA,CORO1A,CXCL1,CXCR4,DAB2,DUSP6,FPR2 (includes EG:100426968),FUT4,HIF1A,IER3,INHBA,INSL3,LRIG1,OSM,OSMR,PADI4,PLAT,PTPN1,QSOX1,RAP1GAP,S100A8,SAA1,SAMSN1,SELP,SEMA3F,SIRPA,SLPI,SOCS3,SPP1 (includes EG:100359743),SRGN,SULF2,TGFB1,THBS2,TNFRSF18 | 44 |
| Cardiovascular System Development and Function | development of cardiovascular system   | 4.30E-08 | CCL7,CCR5,CD44,CDKN1A,CXCL1,CXCR4,DAB2,DUSP6,FPR2 (includes EG:100426968),HIF1A,INHBA,OSM,PLAT,PTPN1,S100A8,SAA1,SELP,SEMA3F,SOCS3,SPP1 (includes EG:100359743),TGFB1,THBS2                                                                                                                                                          | 22 |
| Cellular Movement                              | chemotaxis of antigen presenting cells | 4.48E-08 | CCL7,CCR5,CDKN1A,CXCR4,FPR2 (includes EG:100426968),SAA1,SELP,SPP1 (includes EG:100359743),THBS2                                                                                                                                                                                                                                     | 9  |
| Hematological System Development and Function  | chemotaxis of antigen presenting cells | 4.48E-08 | CCL7,CCR5,CDKN1A,CXCR4,FPR2 (includes EG:100426968),SAA1,SELP,SPP1 (includes EG:100359743),THBS2                                                                                                                                                                                                                                     | 9  |
| Immune Cell Trafficking                        | chemotaxis of antigen presenting cells | 4.48E-08 | CCL7,CCR5,CDKN1A,CXCR4,FPR2 (includes EG:100426968),SAA1,SELP,SPP1 (includes EG:100359743),THBS2                                                                                                                                                                                                                                     | 9  |
| Inflammatory Response                          | chemotaxis of antigen presenting cells | 4.48E-08 | CCL7,CCR5,CDKN1A,CXCR4,FPR2 (includes EG:100426968),SAA1,SELP,SPP1 (includes EG:100359743),THBS2                                                                                                                                                                                                                                     | 9  |

|                                                      |                                      |          |                                                                                                                                                                                                                                                                        |    |
|------------------------------------------------------|--------------------------------------|----------|------------------------------------------------------------------------------------------------------------------------------------------------------------------------------------------------------------------------------------------------------------------------|----|
|                                                      |                                      |          | ADAMTS4,BST2,CASP1,CCL7,CCR5,CD44,CDKN1A,CEBPB (includes EG:1051),CFB,CHI3L1,CHRN1,CP,CXCL1,CXCR4,DAB2,DUSP6,FUT4,GPRC5A,HIF1A,IER3,IFITM2,INHBA,LRIG1,OSM,OSMR,PLAT,PTPN1,RAP1GAP,S100A8,SAAL1,SELP,SEMA3F,SLPI,SOCS3,SPP1 (includes EG:100359743),TGFB1,TMC5,TNFAIP2 | 38 |
| Cancer                                               | carcinoma                            | 4.83E-08 | CASP1,CCR5,CD44,CDKN1A,CEBPB (includes EG:1051),CXCL1,CXCR4,HIF1A,SLPI,SOAT1                                                                                                                                                                                           | 10 |
| Cell Death and Survival                              | cell death of myeloid cells          | 5.73E-08 |                                                                                                                                                                                                                                                                        |    |
| Hematological System Development and Function        | accumulation of blood cells          | 6.71E-08 | CCL7,CCR5,CD44,IER3,OSM,PLAT,PTPN1,S100A8,SELP,SLPI,SPP1 (includes EG:100359743)                                                                                                                                                                                       | 11 |
| Tissue Development                                   | accumulation of blood cells          | 6.71E-08 | CCL7,CCR5,CD44,IER3,OSM,PLAT,PTPN1,S100A8,SELP,SLPI,SPP1 (includes EG:100359743)                                                                                                                                                                                       | 11 |
| Cell Death and Survival                              | cell death of phagocytes             | 7.27E-08 | CASP1,CCR5,CD44,CDKN1A,CEBPB (includes EG:1051),CXCL1,CXCR4,HIF1A,SLPI,SOAT1                                                                                                                                                                                           | 10 |
| Cellular Function and Maintenance                    | function of antigen presenting cells | 7.57E-08 | CASP1,CEBPB (includes EG:1051),CHI3L1,CIITA,FPR2 (includes EG:100426968),PLAT,RGS1,SAMSN1,SIRPA,SLPI,SPP1 (includes EG:100359743)                                                                                                                                      | 11 |
| Cell Morphology                                      | cell spreading                       | 7.87E-08 | CCR5,CD44,CD47,CORO1A,DAB2,RAP1GAP,SAMSN1,SIRPA,SPP1 (includes EG:100359743),TGFB1,THBS2                                                                                                                                                                               | 11 |
| Cellular Movement                                    | cell movement of lymphocytes         | 8.48E-08 | CCL7,CCR5,CD44,CD47,CXCR4,FUT4,RAP1GAP,RGS1,SAAL1,SELP,SOCS3,SPP1 (includes EG:100359743),THBS2                                                                                                                                                                        | 13 |
| Hematological System Development and Function        | cell movement of lymphocytes         | 8.48E-08 | CCL7,CCR5,CD44,CD47,CXCR4,FUT4,RAP1GAP,RGS1,SAAL1,SELP,SOCS3,SPP1 (includes EG:100359743),THBS2                                                                                                                                                                        | 13 |
| Immune Cell Trafficking                              | cell movement of lymphocytes         | 8.48E-08 | CCL7,CCR5,CD44,CD47,CXCR4,FUT4,RAP1GAP,RGS1,SAAL1,SELP,SOCS3,SPP1 (includes EG:100359743),THBS2                                                                                                                                                                        | 13 |
| Cellular Movement                                    | Lymphocyte migration                 | 9.62E-08 | CCL7,CCR5,CD44,CD47,CXCR4,FUT4,RAP1GAP,RGS1,SELP,SOCS3,SPP1 (includes EG:100359743),THBS2                                                                                                                                                                              | 12 |
| Hematological System Development and Function        | Lymphocyte migration                 | 9.62E-08 | CCL7,CCR5,CD44,CD47,CXCR4,FUT4,RAP1GAP,RGS1,SELP,SOCS3,SPP1 (includes EG:100359743),THBS2                                                                                                                                                                              | 12 |
| Immune Cell Trafficking                              | Lymphocyte migration                 | 9.62E-08 | CCL7,CCR5,CD44,CD47,CXCR4,FUT4,RAP1GAP,RGS1,SELP,SOCS3,SPP1 (includes EG:100359743),THBS2                                                                                                                                                                              | 12 |
| Cell-To-Cell Signaling and Interaction               | binding of cells                     | 9.75E-08 | CCL7,CCR5,CD44,CD47,CXCL1,CXCR4,FUT4,INHBA,MSN,OSM,PTPN1,RAP1GAP,SELP,SPP1 (includes EG:100359743),THBS2                                                                                                                                                               | 15 |
| Tissue Development Cellular Growth and Proliferation | accumulation of cells                | 1.10E-07 | CCL7,CCR5,CD44,CDKN1A,IER3,OSM,PLAT,PTPN1,S100A8,SELP,SLPI,SPP1 (includes EG:100359743)                                                                                                                                                                                | 12 |
|                                                      | formation of connective tissue cells | 1.37E-07 | CD44,CD47,CDKN1A,CIITA,INHBA,S100A8,SIRPA,SOC3                                                                                                                                                                                                                         | 8  |
| Cell Death and Survival                              | apoptosis of endothelial cells       | 1.72E-07 | CASP1,CCR5,CDKN1A,CXCR4,DUSP6,PLAT,S100A8,SEMA3F,SPP1 (includes EG:100359743)                                                                                                                                                                                          | 9  |



|                                                       |                                              |          |                                                                                                                                                                                      |    |
|-------------------------------------------------------|----------------------------------------------|----------|--------------------------------------------------------------------------------------------------------------------------------------------------------------------------------------|----|
| Immunological Disease                                 | hypersensitive reaction                      | 1.99E-07 | CCR5,CD44,CD47,CEBPB (includes EG:1051),CORO1A,CXCR4,FSTL1,FUT4,MSN,OSM,OSMR,S100A8,SELP,SPP1 (includes EG:100359743) CD44,CD47,FUT4,RAP1GAP,SELP,SPP1 (includes EG:100359743),THBS2 | 14 |
| Cellular Movement                                     | adhesion of T lymphocytes                    | 2.18E-07 | EG:100359743),THBS2                                                                                                                                                                  | 7  |
| Hematological System Development and Function         | adhesion of T lymphocytes                    | 2.18E-07 | CD44,CD47,FUT4,RAP1GAP,SELP,SPP1 (includes EG:100359743),THBS2                                                                                                                       | 7  |
| Immune Cell Trafficking                               | adhesion of T lymphocytes                    | 2.18E-07 | CD44,CD47,FUT4,RAP1GAP,SELP,SPP1 (includes EG:100359743),THBS2                                                                                                                       | 7  |
| Cell-To-Cell Signaling and Interaction                | adhesion of T lymphocytes                    | 2.18E-07 | CD44,CD47,FUT4,RAP1GAP,SELP,SPP1 (includes EG:100359743),THBS2                                                                                                                       | 7  |
| Tissue Development                                    | adhesion of T lymphocytes                    | 2.18E-07 | CD44,CD47,FUT4,RAP1GAP,SELP,SPP1 (includes EG:100359743),THBS2                                                                                                                       | 7  |
| Cell-mediated Immune Response                         | adhesion of T lymphocytes                    | 2.18E-07 | CD44,CD47,FUT4,RAP1GAP,SELP,SPP1 (includes EG:100359743),THBS2                                                                                                                       | 7  |
| Cell Death and Survival                               | apoptosis of myeloid cells                   | 2.21E-07 | CASP1,CD44,CDKN1A,CEBPB (includes EG:1051),CXCL1,CXCR4,HIF1A,SLPI,SOAT1                                                                                                              | 9  |
| Cellular Growth and Proliferation                     | formation of osteoclasts                     | 2.37E-07 | CD44,CD47,CIITA,INHBA,S100A8,SIRPA,SOCS3                                                                                                                                             | 7  |
| Connective Tissue Development and Function            | formation of osteoclasts                     | 2.37E-07 | CD44,CD47,CIITA,INHBA,S100A8,SIRPA,SOCS3                                                                                                                                             | 7  |
| Skeletal and Muscular System Development and Function | formation of osteoclasts                     | 2.37E-07 | CD44,CD47,CIITA,INHBA,S100A8,SIRPA,SOCS3 CD44,CD47,CDKN1A,CEBPB (includes EG:1051),CXCR4,SELP,SIRPA,SPP1 (includes EG:100359743),THBS2                                               | 7  |
| Tissue Morphology                                     | quantity of bone marrow cells                | 2.45E-07 | EG:100359743),THBS2                                                                                                                                                                  | 9  |
| Lymphoid Tissue Structure and Development             | quantity of bone marrow cells                | 2.45E-07 | CD44,CD47,CDKN1A,CEBPB (includes EG:1051),CXCR4,SELP,SIRPA,SPP1 (includes EG:100359743),THBS2                                                                                        | 9  |
| Cellular Movement                                     | cell movement of peripheral blood leukocytes | 2.45E-07 | CCL7,CCR5,CXCR4,FPR2 (includes EG:100426968),RGS1,SELP                                                                                                                               | 6  |
| Hematological System Development and Function         | cell movement of peripheral blood leukocytes | 2.55E-07 | CCL7,CCR5,CXCR4,FPR2 (includes EG:100426968),RGS1,SELP                                                                                                                               | 6  |
| Immune Cell Trafficking                               | cell movement of peripheral blood leukocytes | 2.55E-07 | CCL7,CCR5,CXCR4,FPR2 (includes EG:100426968),RGS1,SELP                                                                                                                               | 6  |
| Cellular Movement                                     | extravasation of cells                       | 2.86E-07 | CCR5,CD44,CXCL1,CXCR4,RAP1GAP,SELP                                                                                                                                                   | 6  |
| Cellular Movement                                     | transmigration of cells                      | 3.11E-07 | CCL7,CD44,CD47,CXCR4,RAP1GAP,SIRPA,SLPI,SOCS3 CASP1,CD44,CDKN1A,CEBPB (includes EG:1051),CXCL1,CXCR4,HIF1A,SLPI,SOAT1                                                                | 8  |
| Cell Death and Survival                               | apoptosis of phagocytes                      | 3.42E-07 | CASP1,CD44,CDKN1A,CEBPB (includes EG:1051),CXCR4,HIF1A,IER3,INHBA,OSM,SPP1 (includes EG:100359743),THBS2                                                                             | 9  |
| Cancer                                                | development of tumor                         | 3.71E-07 | CCL7,CCR5,CEBPB (includes EG:1051),CHI3L1,CP,SOAT1,SPP1 (includes EG:100359743),SRGN                                                                                                 | 11 |
| Inflammatory Response                                 | morphology of phagocytes                     | 3.93E-07 | CCL7,CCR5,CEBPB (includes EG:1051),CHI3L1,CP,SOAT1,SPP1 (includes EG:100359743),SRGN                                                                                                 | 8  |
| Cell Morphology                                       | morphology of phagocytes                     | 3.93E-07 | EG:100359743),SRGN                                                                                                                                                                   | 8  |

|                                               |                                      |          |                                                                                                                                                                                                                                                                                                                   |    |
|-----------------------------------------------|--------------------------------------|----------|-------------------------------------------------------------------------------------------------------------------------------------------------------------------------------------------------------------------------------------------------------------------------------------------------------------------|----|
| Hematological System Development and Function | accumulation of leukocytes           | 4.29E-07 | CCL7,CCR5,CD44,IER3,OSM,PTPN1,S100A8,SELP,SLPI ,SPP1 (includes EG:100359743)                                                                                                                                                                                                                                      | 10 |
| Immune Cell Trafficking                       | accumulation of leukocytes           | 4.29E-07 | CCL7,CCR5,CD44,IER3,OSM,PTPN1,S100A8,SELP,SLPI ,SPP1 (includes EG:100359743)                                                                                                                                                                                                                                      | 10 |
| Inflammatory Response                         | accumulation of leukocytes           | 4.29E-07 | CCL7,CCR5,CD44,IER3,OSM,PTPN1,S100A8,SELP,SLPI ,SPP1 (includes EG:100359743)                                                                                                                                                                                                                                      | 10 |
| Tissue Development                            | accumulation of leukocytes           | 4.29E-07 | CCL7,CCR5,CD44,IER3,OSM,PTPN1,S100A8,SELP,SLPI ,SPP1 (includes EG:100359743)                                                                                                                                                                                                                                      | 10 |
| Infectious Disease                            | Bacterial Infection                  | 4.62E-07 | CASP1,CCR5,CD44,CD47,CEBPB (includes EG:1051),FUT4,PADI4,SELP,SIRPA,SLC11A1,SLPI,SPP1 (includes EG:100359743),TNFRSF18                                                                                                                                                                                            | 13 |
| Cellular Movement                             | chemotaxis of macrophages            | 4.77E-07 | CCR5,CDKN1A,FPR2 (includes EG:100426968),SAA1,SELP,SPP1 (includes EG:100359743),THBS2                                                                                                                                                                                                                             | 7  |
| Hematological System Development and Function | chemotaxis of macrophages            | 4.77E-07 | CCR5,CDKN1A,FPR2 (includes EG:100426968),SAA1,SELP,SPP1 (includes EG:100359743),THBS2                                                                                                                                                                                                                             | 7  |
| Immune Cell Trafficking                       | chemotaxis of macrophages            | 4.77E-07 | CCR5,CDKN1A,FPR2 (includes EG:100426968),SAA1,SELP,SPP1 (includes EG:100359743),THBS2                                                                                                                                                                                                                             | 7  |
| Inflammatory Response                         | chemotaxis of macrophages            | 4.77E-07 | CCR5,CDKN1A,FPR2 (includes EG:100426968),SAA1,SELP,SPP1 (includes EG:100359743),THBS2                                                                                                                                                                                                                             | 7  |
| Hematological System Development and Function | quantity of antigen presenting cells | 4.98E-07 | CCL7,CD47,CIITA,FPR2 (includes EG:100426968),PLAT,SELP,SIRPA,SOAT1,SOCS3,SPP1 (includes EG:100359743)                                                                                                                                                                                                             | 10 |
| Tissue Morphology                             | quantity of antigen presenting cells | 4.98E-07 | CCL7,CD47,CIITA,FPR2 (includes EG:100426968),PLAT,SELP,SIRPA,SOAT1,SOCS3,SPP1 (includes EG:100359743)                                                                                                                                                                                                             | 10 |
| Hematological System Development and Function | function of myeloid cells            | 5.17E-07 | CASP1,CD47,CEBPB (includes EG:1051),FUT4,PADI4,PLAT,SELP,SIRPA,SLPI,SPP1 (includes EG:100359743)                                                                                                                                                                                                                  | 10 |
| Cellular Function and Maintenance             | function of myeloid cells            | 5.17E-07 | CASP1,CD47,CEBPB (includes EG:1051),FUT4,PADI4,PLAT,SELP,SIRPA,SLPI,SPP1 (includes EG:100359743)                                                                                                                                                                                                                  | 10 |
| Cancer                                        | Cancer                               | 5.27E-07 | ADAMTS4,APOBEC1,BST2,CASP1,CCL7,CCR5,CD44,CD47,CDKN1A,CEBPB (includes EG:1051),CFB,CHI3L1,CHRN1,CIITA,CP,CXCL1,CXCR4,DAB2,DUSP6,FUT4,GPRC5A,HIF1A,IER3,IFITM2,INHBA,LRIG1,MGST1,OSM,OSMR,PLAT,PTPN1,RAP1GAP,RGS1,S100A8,SAA1,SELP,SEMA3F,SLPI,SOCS3,SPP1 (includes EG:100359743),SPSB1,TGFBI,TMC5,TMPRSS4,TNFAIP2 | 45 |
| Cell-To-Cell Signaling and Interaction        | adhesion of tumor cell lines         | 5.78E-07 | CD44,CD47,CXCR4,DAB2,FXYD5,RAP1GAP,SELP,SEMA3F,SPP1 (includes EG:100359743),TNFRSF18                                                                                                                                                                                                                              | 10 |
| Tissue Development                            | adhesion of tumor cell lines         | 5.78E-07 | CD44,CD47,CXCR4,DAB2,FXYD5,RAP1GAP,SELP,SEMA3F,SPP1 (includes EG:100359743),TNFRSF18                                                                                                                                                                                                                              | 10 |

|                                                            |                                 |          |                                                                                                                                                   |    |
|------------------------------------------------------------|---------------------------------|----------|---------------------------------------------------------------------------------------------------------------------------------------------------|----|
| Hematological System Development and Function              | proliferation of lymphocytes    | 6.43E-07 | CCR5,CD44,CD47,CDKN1A,CEBPB (includes EG:1051),CIITA,CORO1A,CXCR4,HIF1A,INHBA,SAMS N1,SIRPA,SLPI,SOCS3,SPP1 (includes EG:100359743),SRGN,TNFRSF18 | 17 |
| Cellular Development                                       | proliferation of lymphocytes    | 6.43E-07 | CCR5,CD44,CD47,CDKN1A,CEBPB (includes EG:1051),CIITA,CORO1A,CXCR4,HIF1A,INHBA,SAMS N1,SIRPA,SLPI,SOCS3,SPP1 (includes EG:100359743),SRGN,TNFRSF18 | 17 |
| Cellular Growth and Proliferation                          | proliferation of lymphocytes    | 6.43E-07 | CCR5,CD44,CXCR4,FUT4,RGS1,SELP,SOCS3,SPP1 (includes EG:100359743),SRGN,TNFRSF18                                                                   | 17 |
| Cellular Movement                                          | cell movement of T lymphocytes  | 6.44E-07 | (includes EG:100359743),THBS2                                                                                                                     | 9  |
| Hematological System Development and Function              | cell movement of T lymphocytes  | 6.44E-07 | CCR5,CD44,CXCR4,FUT4,RGS1,SELP,SOCS3,SPP1 (includes EG:100359743),THBS2                                                                           | 9  |
| Immune Cell Trafficking                                    | cell movement of T lymphocytes  | 6.44E-07 | (includes EG:100359743),THBS2                                                                                                                     | 9  |
| Cell-mediated Immune Response                              | cell movement of T lymphocytes  | 6.44E-07 | CCR5,CD44,CXCR4,FUT4,RGS1,SELP,SOCS3,SPP1 (includes EG:100359743),THBS2                                                                           | 9  |
| Cardiovascular Disease Organismal Injury and Abnormalities | atherogenesis                   | 8.14E-07 | APOBEC1,CCR5,CD44,FUT4,SOAT1,SPP1 (includes EG:100359743)                                                                                         | 6  |
| Cellular Development                                       | proliferation of tumor cells    | 8.68E-07 | APOBEC1,CCR5,CD44,FUT4,SOAT1,SPP1 (includes EG:100359743)                                                                                         | 6  |
| Cellular Growth and Proliferation                          | proliferation of tumor cells    | 8.68E-07 | CASP1,CD44,CD47,CDKN1A,CXCL1,CXCR4,HIF1A,INHBA,OSM,PLAT,SLPI,SOCS3,SPP1 (includes EG:100359743)                                                   | 13 |
| Tumor Morphology                                           | proliferation of tumor cells    | 8.68E-07 | CASP1,CD44,CD47,CDKN1A,CXCL1,CXCR4,HIF1A,INHBA,OSM,PLAT,SLPI,SOCS3,SPP1 (includes EG:100359743)                                                   | 13 |
| Cell-To-Cell Signaling and Interaction                     | adhesion of leukemia cell lines | 8.94E-07 | CD47,DAB2,RAP1GAP,SELP,SPP1 (includes EG:100359743),TNFRSF18                                                                                      | 6  |
| Tissue Development                                         | adhesion of leukemia cell lines | 8.94E-07 | CD47,DAB2,RAP1GAP,SELP,SPP1 (includes EG:100359743),TNFRSF18                                                                                      | 6  |
| Reproductive System Disease                                | endometriosis                   | 9.31E-07 | CASP1,CEBPB (includes EG:1051),CXCR4,FPR2 (includes EG:100426968),HIF1A,INHBA,MGST1,QSOX1,S100A8 ,SLPI,SPP1 (includes EG:100359743),TGFB1,THBS2   | 13 |
| Cellular Movement                                          | migration of dendritic cells    | 9.58E-07 | CCL7,CCR5,CD44,CXCR4,HIF1A,SIRPA,SPP1 (includes EG:100359743)                                                                                     | 7  |
| Hematological System Development and Function              | migration of dendritic cells    | 9.58E-07 | CCL7,CCR5,CD44,CXCR4,HIF1A,SIRPA,SPP1 (includes EG:100359743)                                                                                     | 7  |
| Immune Cell Trafficking                                    | migration of dendritic cells    | 9.58E-07 | CCL7,CCR5,CD44,CXCR4,HIF1A,SIRPA,SPP1 (includes EG:100359743)                                                                                     | 7  |
| Inflammatory Response                                      | migration of dendritic cells    | 9.58E-07 | CCL7,CCR5,CD44,CXCR4,HIF1A,SIRPA,SPP1 (includes EG:100359743)                                                                                     | 7  |

|                                               |                                       |          |                                                                                                                                                                                                                                                                                                                                                 |    |
|-----------------------------------------------|---------------------------------------|----------|-------------------------------------------------------------------------------------------------------------------------------------------------------------------------------------------------------------------------------------------------------------------------------------------------------------------------------------------------|----|
| Connective Tissue Disorders                   | rheumatoid arthritis                  | 9.61E-07 | ADAMTS4,CCL7,CCR5,CEBPB (includes EG:1051),CFB,CHI3L1,CIITA,CXCL1,CXCR4,FPR2 (includes EG:100426968),OSM,PADI4,S100A8,SAA1,SOCS3,SP P1 (includes EG:100359743),TNFRSF18 ADAMTS4,CCL7,CCR5,CEBPB (includes EG:1051),CFB,CHI3L1,CIITA,CXCL1,CXCR4,FPR2 (includes EG:100426968),OSM,PADI4,S100A8,SAA1,SOCS3,SP P1 (includes EG:100359743),TNFRSF18 | 17 |
| Inflammatory Disease                          | rheumatoid arthritis                  | 9.61E-07 | ADAMTS4,CCL7,CCR5,CEBPB (includes EG:1051),CFB,CHI3L1,CIITA,CXCL1,CXCR4,FPR2 (includes EG:100426968),OSM,PADI4,S100A8,SAA1,SOCS3,SP P1 (includes EG:100359743),TNFRSF18                                                                                                                                                                         | 17 |
| Skeletal and Muscular Disorders               | rheumatoid arthritis                  | 9.61E-07 | ADAMTS4,CCL7,CCR5,CEBPB (includes EG:1051),CFB,CHI3L1,CIITA,CXCL1,CXCR4,FPR2 (includes EG:100426968),OSM,PADI4,S100A8,SAA1,SOCS3,SP P1 (includes EG:100359743),TNFRSF18                                                                                                                                                                         | 17 |
| Immunological Disease                         | rheumatoid arthritis                  | 9.61E-07 | ADAMTS4,CCL7,CCR5,CEBPB (includes EG:1051),CFB,CHI3L1,CIITA,CXCL1,CXCR4,FPR2 (includes EG:100426968),OSM,PADI4,S100A8,SAA1,SOCS3,SP P1 (includes EG:100359743),TNFRSF18                                                                                                                                                                         | 17 |
| Cardiovascular Disease                        | atherosclerotic lesion                | 9.84E-07 | APOBEC1,CCR5,CD44,FUT4,SELP,SOAT1,SOCS3,SPP1 (includes EG:100359743)                                                                                                                                                                                                                                                                            | 8  |
| Immunological Disease                         | Sjogren's syndrome                    | 1.02E-06 | CCL7,CCR5,CXCR4,IFITM2,OSM,SOCS3,SPP1 (includes EG:100359743)                                                                                                                                                                                                                                                                                   | 7  |
| Gastrointestinal Disease                      | Sjogren's syndrome                    | 1.02E-06 | CCL7,CCR5,CXCR4,IFITM2,OSM,SOCS3,SPP1 (includes EG:100359743)                                                                                                                                                                                                                                                                                   | 7  |
| Ophthalmic Disease                            | Sjogren's syndrome                    | 1.02E-06 | CCL7,CCR5,CXCR4,IFITM2,OSM,SOCS3,SPP1 (includes EG:100359743)                                                                                                                                                                                                                                                                                   | 7  |
| Hematological System Development and Function | aggregation of blood cells            | 1.15E-06 | CD44,CD47,DAB2,HIF1A,PLAT,PLEK,PTPN1,SELP,THB S2                                                                                                                                                                                                                                                                                                | 9  |
| Tissue Development                            | aggregation of blood cells            | 1.15E-06 | CD44,CD47,DAB2,HIF1A,PLAT,PLEK,PTPN1,SELP,THB S2                                                                                                                                                                                                                                                                                                | 9  |
| Hematological System Development and Function | activation of lymphocytes             | 1.20E-06 | CCL7,CD44,CD47,CDKN1A,CORO1A,HIF1A,MGST1,OS M,SAMSN1,SIRPA,SLC11A1,SPP1 (includes EG:100359743),TNFRSF18                                                                                                                                                                                                                                        | 13 |
| Immune Cell Trafficking                       | activation of lymphocytes             | 1.20E-06 | CCL7,CD44,CD47,CDKN1A,CORO1A,HIF1A,MGST1,OS M,SAMSN1,SIRPA,SLC11A1,SPP1 (includes EG:100359743),TNFRSF18                                                                                                                                                                                                                                        | 13 |
| Inflammatory Response                         | activation of lymphocytes             | 1.20E-06 | CCL7,CD44,CD47,CDKN1A,CORO1A,HIF1A,MGST1,OS M,SAMSN1,SIRPA,SLC11A1,SPP1 (includes EG:100359743),TNFRSF18                                                                                                                                                                                                                                        | 13 |
| Cell-To-Cell Signaling and Interaction        | activation of lymphocytes             | 1.20E-06 | CCL7,CD44,CD47,CDKN1A,CORO1A,HIF1A,MGST1,OS M,SAMSN1,SIRPA,SLC11A1,SPP1 (includes EG:100359743),TNFRSF18                                                                                                                                                                                                                                        | 13 |
| Cellular Movement                             | migration of antigen presenting cells | 1.39E-06 | CCL7,CCR5,CD44,CXCL1,CXCR4,HIF1A,SIRPA,SPP1 (includes EG:100359743)                                                                                                                                                                                                                                                                             | 8  |
| Hematological System Development and Function | migration of antigen presenting cells | 1.39E-06 | CCL7,CCR5,CD44,CXCL1,CXCR4,HIF1A,SIRPA,SPP1 (includes EG:100359743)                                                                                                                                                                                                                                                                             | 8  |
| Immune Cell Trafficking                       | migration of antigen presenting cells | 1.39E-06 | CCL7,CCR5,CD44,CXCL1,CXCR4,HIF1A,SIRPA,SPP1 (includes EG:100359743)                                                                                                                                                                                                                                                                             | 8  |
| Cellular Movement                             | recruitment of neutrophils            | 1.39E-06 | CASP1,CCL7,CD44,CD47,CHI3L1,CXCL1,SELP,SLPI                                                                                                                                                                                                                                                                                                     | 8  |

|                                               |                                          |          |                                                                                                                                            |    |
|-----------------------------------------------|------------------------------------------|----------|--------------------------------------------------------------------------------------------------------------------------------------------|----|
| Hematological System Development and Function | recruitment of neutrophils               | 1.39E-06 | CASP1,CCL7,CD44,CD47,CHI3L1,CXCL1,SELP,SLPI                                                                                                | 8  |
| Immune Cell Trafficking                       | recruitment of neutrophils               | 1.39E-06 | CASP1,CCL7,CD44,CD47,CHI3L1,CXCL1,SELP,SLPI                                                                                                | 8  |
| Inflammatory Response                         | recruitment of neutrophils               | 1.39E-06 | CASP1,CCL7,CD44,CD47,CHI3L1,CXCL1,SELP,SLPI                                                                                                | 8  |
| Cell-To-Cell Signaling and Interaction        | recruitment of neutrophils               | 1.39E-06 | CASP1,CCL7,CD44,CD47,CHI3L1,CXCL1,SELP,SLPI                                                                                                | 8  |
| Hematological System Development and Function | quantity of T lymphocytes                | 1.44E-06 | BST2,CCR5,CD47,CDKN1A,CHI3L1,CIITA,CORO1A,CXCR4,HIF1A,OSM,SELP,SIRPA,SOCS3,SPP1 (includes EG:100359743)                                    | 14 |
| Tissue Morphology                             | quantity of T lymphocytes                | 1.44E-06 | BST2,CCR5,CD47,CDKN1A,CHI3L1,CIITA,CORO1A,CXCR4,HIF1A,OSM,SELP,SIRPA,SOCS3,SPP1 (includes EG:100359743)                                    | 14 |
| Cellular Growth and Proliferation             | proliferation of connective tissue cells | 1.53E-06 | CD44,CDKN1A,CEBPB (includes EG:1051),CIITA,HIF1A,INHBA,LRIG1,OSM,PLAT,PTPN1,SAA1,SIRPA,SOCS3,SPP1 (includes EG:100359743)                  | 14 |
| Cellular Movement                             | cell movement of leukemia cell lines     | 1.69E-06 | CCL7,CD44,CD47,CXCR4,FPR2 (includes EG:100426968),RGS1,SELP                                                                                | 7  |
| Cellular Movement                             | transmigration of leukocytes             | 1.69E-06 | CCL7,CD44,CD47,CXCR4,SIRPA,SLPI,SOCS3                                                                                                      | 7  |
| Hematological System Development and Function | transmigration of leukocytes             | 1.69E-06 | CCL7,CD44,CD47,CXCR4,SIRPA,SLPI,SOCS3                                                                                                      | 7  |
| Immune Cell Trafficking                       | transmigration of leukocytes             | 1.69E-06 | CCL7,CD44,CD47,CXCR4,SIRPA,SLPI,SOCS3                                                                                                      | 7  |
| Carbohydrate Metabolism                       | binding of carbohydrate                  | 1.80E-06 | CD44,OSM,SELP,SLPI,SPP1 (includes EG:100359743),SULF2                                                                                      | 6  |
| Inflammatory Response                         | inflammation of organ                    | 1.82E-06 | CASP1,CCR5,CD44,CD47,CDKN1A,CEBPB (includes EG:1051),CFB,CIITA,HIF1A,PLAT,S100A8,SELP,SLPI,S OAT1,SOCS3,SPP1 (includes EG:100359743),THBS2 | 17 |
| Tissue Morphology                             | quantity of lymphatic system cells       | 2.02E-06 | CD44,CD47,CDKN1A,CEBPB (includes EG:1051),CXCR4,RGS1,SELP,SIRPA,SPP1 (includes EG:100359743),THBS2                                         | 10 |
| Lymphoid Tissue Structure and Development     | quantity of lymphatic system cells       | 2.02E-06 | CD44,CD47,CDKN1A,CEBPB (includes EG:1051),CXCR4,RGS1,SELP,SIRPA,SPP1 (includes EG:100359743),THBS2                                         | 10 |
| Hematological System Development and Function | function of lymphocytes                  | 2.66E-06 | CCR5,CD44,CEBPB (includes EG:1051),CHI3L1,CIITA,CXCR4,RGS1,SAMSN1,SELP,S LPI,TNFRSF18                                                      | 11 |
| Cellular Function and Maintenance             | function of lymphocytes                  | 2.66E-06 | CCR5,CD44,CEBPB (includes EG:1051),CHI3L1,CIITA,CXCR4,RGS1,SAMSN1,SELP,S LPI,TNFRSF18                                                      | 11 |
| Cell-To-Cell Signaling and Interaction        | binding of tumor cell lines              | 2.75E-06 | CCR5,CD44,CD47,CXCR4,OSM,RAP1GAP,SELP,SPP1 (includes EG:100359743)                                                                         | 8  |
| Cellular Movement                             | chemotaxis of embryonic cell lines       | 2.93E-06 | CCR5,CXCL1,CXCR4,FPR2 (includes EG:100426968)                                                                                              | 4  |
| Embryonic Development                         | chemotaxis of embryonic cell lines       | 2.93E-06 | CCR5,CXCL1,CXCR4,FPR2 (includes EG:100426968)                                                                                              | 4  |

|                                                                                       |                                         |          |                                                                                                                                                                         |        |
|---------------------------------------------------------------------------------------|-----------------------------------------|----------|-------------------------------------------------------------------------------------------------------------------------------------------------------------------------|--------|
| Cellular Movement<br>Hair and Skin<br>Development and<br>Function                     | chemotaxis of epithelial cell lines     | 2.93E-06 | CCR5,CXCL1,CXCR4,FPR2 (includes EG:100426968)                                                                                                                           | 4      |
| Cellular Development                                                                  | chemotaxis of epithelial cell lines     | 2.93E-06 | CCR5,CXCL1,CXCR4,FPR2 (includes EG:100426968)<br>CDKN1A,CEBPB (includes<br>EG:1051),CXCR4,INHBA,OSM,OSMR,SOCS3,SPP1<br>(includes EG:100359743)                          | 4<br>8 |
| Cellular Growth and<br>Proliferation<br>Hepatic System<br>Development and<br>Function | proliferation of liver cells            | 3.00E-06 | CDKN1A,CEBPB (includes<br>EG:1051),CXCR4,INHBA,OSM,OSMR,SOCS3,SPP1<br>(includes EG:100359743)                                                                           | 8      |
| Organismal Injury and<br>Abnormalities<br>Respiratory Disease                         | proliferation of liver cells            | 3.00E-06 | CDKN1A,CEBPB (includes<br>EG:1051),CXCR4,INHBA,OSM,OSMR,SOCS3,SPP1<br>(includes EG:100359743)                                                                           | 8      |
|                                                                                       | damage of lung                          | 3.16E-06 | CASP1,CCR5,CD44,CFB,HIF1A,SELP,SLPI                                                                                                                                     | 7      |
|                                                                                       | damage of lung                          | 3.16E-06 | CASP1,CCR5,CD44,CFB,HIF1A,SELP,SLPI<br>BST2,CCR5,CIITA,CXCR4,S100A8,SOCS3,SPP1<br>(includes EG:100359743)                                                               | 7<br>7 |
| Infectious Disease                                                                    | replication of HIV                      | 3.16E-06 | (includes EG:100359743)                                                                                                                                                 | 7      |
| Immunological<br>Disease                                                              | delayed hypersensitive reaction         | 3.34E-06 | CCR5,CD44,CD47,CEBPB (includes<br>EG:1051),FUT4,SELP,SPP1 (includes EG:100359743)<br>CASP1,CCR5,DUSP6,S100A8,SEMA3F,SPP1 (includes<br>EG:100359743)                     | 7<br>6 |
| Cell Death and Survival                                                               | apoptosis of vascular endothelial cells | 4.17E-06 | CCR5,CXCL1,CXCR4,FPR2 (includes<br>EG:100426968),OSM,SAA1                                                                                                               | 6      |
| Cellular Movement<br>Hair and Skin<br>Development and<br>Function                     | cell movement of epithelial cell lines  | 4.17E-06 | CCR5,CXCL1,CXCR4,FPR2 (includes<br>EG:100426968),OSM,SAA1                                                                                                               | 6      |
| Hematological System<br>Development and<br>Function                                   | fusion of leukocytes                    | 4.39E-06 | CCR5,CD44,CXCR4,SIRPA                                                                                                                                                   | 4      |
| Immune Cell<br>Trafficking                                                            | fusion of leukocytes                    | 4.39E-06 | CCR5,CD44,CXCR4,SIRPA                                                                                                                                                   | 4      |
| Cell-To-Cell Signaling<br>and Interaction                                             | fusion of leukocytes                    | 4.39E-06 | CCR5,CD44,CXCR4,SIRPA                                                                                                                                                   | 4      |
| Tissue Development                                                                    | fusion of leukocytes                    | 4.39E-06 | CCR5,CD44,CXCR4,SIRPA                                                                                                                                                   | 4      |
| Infectious Disease                                                                    | fusion of leukocytes                    | 4.39E-06 | CCR5,CD44,CXCR4,SIRPA                                                                                                                                                   | 4      |
| Cell Death and Survival                                                               | apoptosis of tumor cell lines           | 4.99E-06 | CASP1,CCR5,CD44,CD47,CDKN1A,CEBPB (includes<br>EG:1051),DAB2,HIF1A,IER3,INHBA,MSN,OSM,PADI4,<br>S100A8,SEMA3F,SIRPA,SLPI,SOCS3,SPP1 (includes<br>EG:100359743),TNFRSF18 | 20     |
| Cellular Movement                                                                     | chemotaxis of T lymphocytes             | 5.13E-06 | CCR5,CXCR4,RGS1,SOCS3,SPP1 (includes<br>EG:100359743),THBS2                                                                                                             | 6      |
| Hematological System<br>Development and<br>Function                                   | chemotaxis of T lymphocytes             | 5.13E-06 | CCR5,CXCR4,RGS1,SOCS3,SPP1 (includes<br>EG:100359743),THBS2                                                                                                             | 6      |
| Immune Cell<br>Trafficking                                                            | chemotaxis of T lymphocytes             | 5.13E-06 | CCR5,CXCR4,RGS1,SOCS3,SPP1 (includes<br>EG:100359743),THBS2                                                                                                             | 6      |
| Inflammatory<br>Response                                                              | chemotaxis of T lymphocytes             | 5.13E-06 | CCR5,CXCR4,RGS1,SOCS3,SPP1 (includes<br>EG:100359743),THBS2                                                                                                             | 6      |
| Cell-mediated Immune<br>Response                                                      | chemotaxis of T lymphocytes             | 5.13E-06 | CCR5,CXCR4,RGS1,SOCS3,SPP1 (includes<br>EG:100359743),THBS2                                                                                                             | 6      |

|                                               |                                   |          |                                                                                                                                                                                                    |    |
|-----------------------------------------------|-----------------------------------|----------|----------------------------------------------------------------------------------------------------------------------------------------------------------------------------------------------------|----|
| Hematological System Development and Function | morphology of macrophages         | 5.13E-06 | CCR5,CEBPB (includes EG:1051),CHI3L1,CP,SOAT1,SPP1 (includes EG:100359743)                                                                                                                         | 6  |
| Inflammatory Response                         | morphology of macrophages         | 5.13E-06 | CCR5,CEBPB (includes EG:1051),CHI3L1,CP,SOAT1,SPP1 (includes EG:100359743)                                                                                                                         | 6  |
| Cell Morphology                               | morphology of macrophages         | 5.13E-06 | CCR5,CEBPB (includes EG:1051),CHI3L1,CP,SOAT1,SPP1 (includes EG:100359743)                                                                                                                         | 6  |
| Hematological System Development and Function | binding of leukocytes             | 5.33E-06 | CCL7,CCR5,CD44,CD47,FUT4,MSN,RAP1GAP,SELP                                                                                                                                                          | 8  |
| Cell-To-Cell Signaling and Interaction        | binding of leukocytes             | 5.33E-06 | CCL7,CCR5,CD44,CD47,FUT4,MSN,RAP1GAP,SELP                                                                                                                                                          | 8  |
| Cancer                                        | head and neck tumor               | 6.02E-06 | APOBEC1,CCR5,CD44,CDKN1A,CHI3L1,CHRN1, CXCR4,PLAT,RAP1GAP,S100A8,SEMA3F,SLPI,SOCS3,SPP1 (includes EG:100359743),TMPRSS4                                                                            | 15 |
| Carbohydrate Metabolism                       | binding of polysaccharide         | 6.13E-06 | CD44,OSM,SELP,SPP1 (includes EG:100359743),SULF2                                                                                                                                                   | 5  |
| Cellular Movement                             | extravasation of myeloid cells    | 6.33E-06 | CCR5,CD44,CXCL1,SELP                                                                                                                                                                               | 4  |
| Hematological System Development and Function | extravasation of myeloid cells    | 6.33E-06 | CCR5,CD44,CXCL1,SELP                                                                                                                                                                               | 4  |
| Tissue Morphology                             | abnormal morphology of lymph node | 6.47E-06 | BST2,CDKN1A,CEBPB (includes EG:1051),CIITA,FPR2 (includes EG:100426968),FUT4,SELP                                                                                                                  | 7  |
| Lymphoid Tissue Structure and Development     | abnormal morphology of lymph node | 6.47E-06 | BST2,CDKN1A,CEBPB (includes EG:1051),CIITA,FPR2 (includes EG:100426968),FUT4,SELP                                                                                                                  | 7  |
| Organ Morphology                              | abnormal morphology of lymph node | 6.47E-06 | BST2,CDKN1A,CEBPB (includes EG:1051),CIITA,FPR2 (includes EG:100426968),FUT4,SELP                                                                                                                  | 7  |
| Cellular Development                          | proliferation of hepatocytes      | 6.47E-06 | CDKN1A,CEBPB (includes EG:1051),CXCR4,INHBA,OSM,OSMR,SOCS3                                                                                                                                         | 7  |
| Cellular Growth and Proliferation             | proliferation of hepatocytes      | 6.47E-06 | CDKN1A,CEBPB (includes EG:1051),CXCR4,INHBA,OSM,OSMR,SOCS3                                                                                                                                         | 7  |
| Hepatic System Development and Function       | proliferation of hepatocytes      | 6.47E-06 | CDKN1A,CEBPB (includes EG:1051),CXCR4,INHBA,OSM,OSMR,SOCS3                                                                                                                                         | 7  |
| Cellular Function and Maintenance             | cellular homeostasis              | 6.55E-06 | CASP1,CCL7,CCR5,CD47,CDKN1A,CEBPB (includes EG:1051),CHRN1,CIITA,CORO1A,CP,CXCL1,CXCR4,FPR2 (includes EG:100426968),HIF1A,INHBA,OSM,RAP1GAP,SIRPA,SLC11A1,SOCS3,SPP1 (includes EG:100359743),THBS2 | 22 |
| Hematological System Development and Function | proliferation of T lymphocytes    | 6.71E-06 | CCR5,CD44,CD47,CDKN1A,CIITA,CORO1A,CXCR4,INHBA,SAMSN1,SIRPA,SOCS3,SPP1 (includes EG:100359743),SRGN,TNFRSF18                                                                                       | 14 |
| Cellular Development                          | proliferation of T lymphocytes    | 6.71E-06 | CCR5,CD44,CD47,CDKN1A,CIITA,CORO1A,CXCR4,INHBA,SAMSN1,SIRPA,SOCS3,SPP1 (includes EG:100359743),SRGN,TNFRSF18                                                                                       | 14 |

|                                                      |                                            |          |                                                                                                                                                                         |    |
|------------------------------------------------------|--------------------------------------------|----------|-------------------------------------------------------------------------------------------------------------------------------------------------------------------------|----|
| Cellular Growth and Proliferation                    | proliferation of T lymphocytes             | 6.71E-06 | CCR5,CD44,CD47,CDKN1A,CIITA,CORO1A,CXCR4,INHBA,SAMSN1,SIRPA,SOCS3,SPP1 (includes EG:100359743),SRGN,TNFRSF18                                                            | 14 |
| Cell Death and Survival                              | cell viability                             | 6.83E-06 | CASP1,CD44,CD47,CDKN1A,CEBPB (includes EG:1051),CHI3L1,CXCR4,DAB2,DUSP6,HIF1A,LRIG1,MGST1,OSM,PTPN1,SIRPA,SLPI,SOCS3,SPP1 (includes EG:100359743),THBS2,TNFRSF18        | 20 |
| Hematological System Development and Function        | quantity of hematopoietic progenitor cells | 7.46E-06 | CD44,CD47,CDKN1A,CIITA,CORO1A,CXCR4,INHBA,OSM,SELP,SIRPA,SPP1 (includes EG:100359743),THBS2                                                                             | 12 |
| Tissue Morphology                                    | quantity of hematopoietic progenitor cells | 7.46E-06 | CD44,CD47,CDKN1A,CIITA,CORO1A,CXCR4,INHBA,OSM,SELP,SIRPA,SPP1 (includes EG:100359743),THBS2                                                                             | 12 |
| Hematopoiesis                                        | quantity of hematopoietic progenitor cells | 7.46E-06 | CD44,CDKN1A,IFITM2,INHBA,OSM,SPP1 (includes EG:100359743),THBS2                                                                                                         | 12 |
| Connective Tissue Disorders                          | bone cancer                                | 7.59E-06 | CD44,CDKN1A,IFITM2,INHBA,OSM,SPP1 (includes EG:100359743)                                                                                                               | 6  |
| Skeletal and Muscular Disorders                      | bone cancer                                | 7.59E-06 | CD44,CDKN1A,IFITM2,INHBA,OSM,SPP1 (includes EG:100359743)                                                                                                               | 6  |
| Cancer                                               | bone cancer                                | 7.59E-06 | CD44,CDKN1A,IFITM2,INHBA,OSM,SPP1 (includes EG:100359743)                                                                                                               | 6  |
| Inflammatory Response                                | response of phagocytes                     | 8.09E-06 | CCR5,CD44,CD47,CEBPB (includes EG:1051),CORO1A,CXCL1,OSM,PADI4                                                                                                          | 8  |
| Cell-To-Cell Signaling and Interaction               | response of phagocytes                     | 8.09E-06 | CCR5,CD44,CD47,CEBPB (includes EG:1051),CORO1A,CXCL1,OSM,PADI4                                                                                                          | 8  |
| Hematological System Development and Function        | morphology of myeloid cells                | 8.19E-06 | CCL7,CCR5,CHI3L1,CP,SELP,SOAT1,SPP1 (includes EG:100359743)                                                                                                             | 7  |
| Cell Morphology                                      | morphology of myeloid cells                | 8.19E-06 | CCL7,CCR5,CHI3L1,CP,SELP,SOAT1,SPP1 (includes EG:100359743)                                                                                                             | 7  |
| Organismal Survival                                  | survival of organism                       | 8.36E-06 | APOBEC1,CASP1,CCR5,CD44,CD47,CDKN1A,CEBPB (includes EG:1051),INHBA,PLAT,PTPN1,SOCS3,SPP1 (includes EG:100359743),THBS2,TNFRSF18                                         | 14 |
| Cellular Development                                 | proliferation of tumor cell lines          | 8.75E-06 | CASP1,CD44,CDKN1A,CEBPB (includes EG:1051),CXCL1,CXCR4,DAB2,FUT4,HIF1A,IER3,INHBA,LRIG1,OSM,PADI4,PLAT,PTPN1,RAP1GAP,SELP,SLPI,SOCS3,SPP1 (includes EG:100359743),THBS2 | 22 |
| Cellular Growth and Proliferation                    | proliferation of tumor cell lines          | 8.75E-06 | CASP1,CD44,CDKN1A,CEBPB (includes EG:1051),CXCL1,CXCR4,DAB2,FUT4,HIF1A,IER3,INHBA,LRIG1,OSM,PADI4,PLAT,PTPN1,RAP1GAP,SELP,SLPI,SOCS3,SPP1 (includes EG:100359743),THBS2 | 22 |
| Cellular Movement                                    | chemotaxis of kidney cell lines            | 8.83E-06 | CCR5,CXCL1,CXCR4,FPR2 (includes EG:100426968)                                                                                                                           | 4  |
| Renal and Urological System Development and Function | chemotaxis of kidney cell lines            | 8.83E-06 | CCR5,CXCL1,CXCR4,FPR2 (includes EG:100426968)                                                                                                                           | 4  |
| Cardiovascular System Development and Function       | vascularization                            | 9.70E-06 | CCR5,CD44,CD47,CXCR4,HIF1A,INHBA,SPP1 (includes EG:100359743),THBS2                                                                                                     | 8  |



|                                   |                                            |          |                                               |    |
|-----------------------------------|--------------------------------------------|----------|-----------------------------------------------|----|
| Cell Death and Survival           | apoptosis of neutrophils                   | 9.77E-06 | CASP1,CD44,CXCL1,CXCR4,SLPI                   | 5  |
|                                   |                                            |          | APOBEC1,CASP1,CDKN1A,CHRN1A,CXCR4,HIF1A,PLA   |    |
|                                   |                                            |          | T,RAP1GAP,S100A8,SLPI,SOCS3,SPP1 (includes    |    |
| Cancer                            | endocrine gland tumor                      | 9.94E-06 | EG:100359743),TMPRSS4                         | 13 |
| Cellular Development              | proliferation of ovarian cancer cell lines | 1.03E-05 | CD44,CXCR4,DAB2,INHBA,LRIG1,SLPI              | 6  |
| Cellular Growth and Proliferation | proliferation of ovarian cancer cell lines | 1.03E-05 | CD44,CXCR4,DAB2,INHBA,LRIG1,SLPI              | 6  |
| Cellular Movement                 | emigration of dendritic cells              | 1.07E-05 | CD44,SIRPA,SPP1 (includes EG:100359743)       | 3  |
| Hematological System              |                                            |          |                                               |    |
| Development and                   |                                            |          |                                               |    |
| Function                          | emigration of dendritic cells              | 1.07E-05 | CD44,SIRPA,SPP1 (includes EG:100359743)       | 3  |
| Immune Cell                       |                                            |          |                                               |    |
| Trafficking                       | emigration of dendritic cells              | 1.07E-05 | CD44,SIRPA,SPP1 (includes EG:100359743)       | 3  |
| Inflammatory                      |                                            |          |                                               |    |
| Response                          | emigration of dendritic cells              | 1.07E-05 | CD44,SIRPA,SPP1 (includes EG:100359743)       | 3  |
| Cellular Function and             |                                            |          |                                               |    |
| Maintenance                       | function of dendritic cells                | 1.09E-05 | CHI3L1,CIITA,FPR2 (includes                   |    |
|                                   |                                            |          | EG:100426968),RGS1,SAMSN1,SIRPA               | 6  |
| Hematological System              |                                            |          |                                               |    |
| Development and                   |                                            |          |                                               |    |
| Function                          | accumulation of myeloid cells              | 1.12E-05 | CCL7,CD44,OSM,S100A8,SELP,SLPI,SPP1 (includes | 7  |
|                                   |                                            |          | EG:100359743)                                 |    |
| Immune Cell                       |                                            |          |                                               |    |
| Trafficking                       | accumulation of myeloid cells              | 1.12E-05 | CCL7,CD44,OSM,S100A8,SELP,SLPI,SPP1 (includes | 7  |
|                                   |                                            |          | EG:100359743)                                 |    |
| Inflammatory                      |                                            |          |                                               |    |
| Response                          | accumulation of myeloid cells              | 1.12E-05 | CCL7,CD44,OSM,S100A8,SELP,SLPI,SPP1 (includes | 7  |
|                                   |                                            |          | EG:100359743)                                 |    |
| Tissue Development                |                                            |          |                                               |    |
|                                   | accumulation of myeloid cells              | 1.12E-05 | CCL7,CD44,OSM,S100A8,SELP,SLPI,SPP1 (includes | 7  |
|                                   |                                            |          | EG:100359743)                                 |    |
| Hematological System              |                                            |          |                                               |    |
| Development and                   |                                            |          |                                               |    |
| Function                          | aggregation of blood platelets             | 1.23E-05 | CD47,DAB2,PLAT,PLEK,PTPN1,SELP,THBS2          | 7  |
| Inflammatory                      |                                            |          |                                               |    |
| Response                          | aggregation of blood platelets             | 1.23E-05 | CD47,DAB2,PLAT,PLEK,PTPN1,SELP,THBS2          | 7  |
| Tissue Development                |                                            |          |                                               |    |
|                                   | aggregation of blood platelets             | 1.23E-05 | CD47,DAB2,PLAT,PLEK,PTPN1,SELP,THBS2          | 7  |
| Cardiovascular Disease            | myocardial infarction                      | 1.33E-05 | CD44,CD47,CXCR4,DUSP6,FSTL1,PLAT,SELP         | 7  |
|                                   |                                            |          | CD44,CDKN1A,CEBPB (includes                   |    |
| Cellular Development              | differentiation of tumor cells             | 1.38E-05 | EG:1051),INHBA,OSM                            | 5  |
|                                   |                                            |          | CD44,CDKN1A,CEBPB (includes                   |    |
| Cancer                            | differentiation of tumor cells             | 1.38E-05 | EG:1051),INHBA,OSM                            | 5  |
|                                   |                                            |          | CD44,CDKN1A,CEBPB (includes                   |    |
| Tumor Morphology                  | differentiation of tumor cells             | 1.38E-05 | EG:1051),INHBA,OSM                            | 5  |
|                                   | transmigration of mononuclear              |          |                                               |    |
| Cellular Movement                 | leukocytes                                 | 1.38E-05 | CCL7,CD44,CD47,CXCR4,SIRPA                    | 5  |
| Hematological System              |                                            |          |                                               |    |
| Development and                   |                                            |          |                                               |    |
| Function                          | transmigration of mononuclear              | 1.38E-05 | CCL7,CD44,CD47,CXCR4,SIRPA                    | 5  |
|                                   | leukocytes                                 |          |                                               |    |
| Immune Cell                       |                                            |          |                                               |    |
| Trafficking                       | transmigration of mononuclear              | 1.38E-05 | CCL7,CD44,CD47,CXCR4,SIRPA                    | 5  |
|                                   | leukocytes                                 |          |                                               |    |
| Organismal Injury and             |                                            |          |                                               |    |
| Abnormalities                     | damage of liver                            | 1.39E-05 | CCR5,CD44,CDKN1A,CXCL1,OSM,PLAT,PTPN1         | 7  |
| Gastrointestinal                  |                                            |          |                                               |    |
| Disease                           | damage of liver                            | 1.39E-05 | CCR5,CD44,CDKN1A,CXCL1,OSM,PLAT,PTPN1         | 7  |

|                                                |                                            |          |                                                                                                                                                                            |    |
|------------------------------------------------|--------------------------------------------|----------|----------------------------------------------------------------------------------------------------------------------------------------------------------------------------|----|
| Hepatic System Disease                         | damage of liver                            | 1.39E-05 | CCR5,CD44,CDKN1A,CXCL1,OSM,PLAT,PTPN1                                                                                                                                      | 7  |
| Cardiovascular System Development and Function | angiogenesis                               | 1.41E-05 | CCL7,CD44,CXCL1,CXCR4,HIF1A,INHBA,OSM,PLAT,SA A1,SELP,SEMA3F,SPP1 (includes EG:100359743),TGFB1,THBS2                                                                      | 14 |
| Cell Signaling                                 | mobilization of Ca2+                       | 1.68E-05 | CCL7,CCR5,CD44,CXCL1,CXCR4,FPR2 (includes EG:100426968),GPR35,PILRA,SAA1,SIRPA                                                                                             | 10 |
| Molecular Transport                            | mobilization of Ca2+                       | 1.68E-05 | CCL7,CCR5,CD44,CXCL1,CXCR4,FPR2 (includes EG:100426968),GPR35,PILRA,SAA1,SIRPA                                                                                             | 10 |
| Vitamin and Mineral Metabolism                 | mobilization of Ca2+                       | 1.68E-05 | CCL7,CCR5,CD44,CXCL1,CXCR4,FPR2 (includes EG:100426968),GPR35,PILRA,SAA1,SIRPA                                                                                             | 10 |
| Lymphoid Tissue Structure and Development      | morphology of lymphatic system component   | 1.69E-05 | BST2,CD47,CDKN1A,CEBPB (includes EG:1051),CIITA,CXCR4,FPR2 (includes EG:100426968),FUT4,RGS1,SELP,TGFB1,THBS2                                                              | 12 |
| Infectious Disease                             | replication of HIV-1                       | 1.72E-05 | BST2,CCR5,CIITA,CXCR4,S100A8,SOCS3                                                                                                                                         | 6  |
| Cell Death and Survival                        | cell death of tumor cell lines             | 1.80E-05 | CASP1,CCR5,CD44,CD47,CDKN1A,CEBPB (includes EG:1051),DAB2,HIF1A,IER3,INHBA,MSN,OSM,PADI4,RAP1GAP,S100A8,SEMA3F,SIRPA,SLPI,SOCS3,SPP1 (includes EG:100359743),TNFRSF18      | 21 |
| Carbohydrate Metabolism                        | binding of glycosaminoglycan               | 1.82E-05 | CD44,OSM,SPP1 (includes EG:100359743),SULF2                                                                                                                                | 4  |
| Small Molecule Biochemistry                    | binding of glycosaminoglycan               | 1.82E-05 | CD44,OSM,SPP1 (includes EG:100359743),SULF2                                                                                                                                | 4  |
| Organismal Injury and Abnormalities            | formation of lesion                        | 1.85E-05 | APOBEC1,CCR5,CD44,CEBPB (includes EG:1051),FUT4,SLPI,SOAT1,SPP1 (includes EG:100359743)                                                                                    | 8  |
| Cellular Movement                              | cell movement of monocytes                 | 2.01E-05 | CCL7,CD47,CXCR4,FPR2 (includes EG:100426968),INHBA,SIRPA,SPP1 (includes EG:100359743)                                                                                      | 7  |
| Hematological System Development and Function  | cell movement of monocytes                 | 2.01E-05 | CCL7,CD47,CXCR4,FPR2 (includes EG:100426968),INHBA,SIRPA,SPP1 (includes EG:100359743)                                                                                      | 7  |
| Immune Cell Trafficking                        | cell movement of monocytes                 | 2.01E-05 | CCL7,CD47,CXCR4,FPR2 (includes EG:100426968),INHBA,SIRPA,SPP1 (includes EG:100359743)                                                                                      | 7  |
| Inflammatory Response                          | cell movement of monocytes                 | 2.01E-05 | CCL7,CD47,CXCR4,FPR2 (includes EG:100426968),INHBA,SIRPA,SPP1 (includes EG:100359743)                                                                                      | 7  |
| Cell Cycle                                     | cell cycle progression of tumor cell lines | 2.04E-05 | CD44,CDKN1A,CEBPB (includes EG:1051),HIF1A,IER3,INHBA,LRIG1,PADI4                                                                                                          | 8  |
| Cell Morphology                                | morphology of cells                        | 2.04E-05 | ADAMTS4,CCL7,CCR5,CD44,CDKN1A,CEBPB (includes EG:1051),CHI3L1,CP,CXCR4,FSTL1,INHBA,OSM,OSM R,PTPN1,RAP1GAP,SELP,SEMA3F,SIRPA,SOAT1,SPP1 (includes EG:100359743),SRGN,SULF2 | 22 |
| Cellular Movement                              | invasion of endocrine cell lines           | 2.09E-05 | CD44,CXCR4,SPP1 (includes EG:100359743)                                                                                                                                    | 3  |
| Hematological System Development and Function  | T cell homeostasis                         | 2.15E-05 | CASP1,CDKN1A,CEBPB (includes EG:1051),CIITA,CORO1A,CXCR4,HIF1A,INHBA,OSM,SIRPA,SOCS3,SPP1 (includes EG:100359743)                                                          | 12 |

|                                               |                                         |          |                                                                                                                   |    |
|-----------------------------------------------|-----------------------------------------|----------|-------------------------------------------------------------------------------------------------------------------|----|
| Cellular Function and Maintenance             | T cell homeostasis                      | 2.15E-05 | CASP1,CDKN1A,CEBPB (includes EG:1051),CIITA,CORO1A,CXCR4,HIF1A,INHBA,OSM,SIRPA,SOCS3,SPP1 (includes EG:100359743) | 12 |
| Cell-mediated Immune Response                 | T cell homeostasis                      | 2.15E-05 | CASP1,CDKN1A,CEBPB (includes EG:1051),CIITA,CORO1A,CXCR4,HIF1A,INHBA,OSM,SIRPA,SOCS3,SPP1 (includes EG:100359743) | 12 |
| Hematological System Development and Function | activation of T lymphocytes             | 2.17E-05 | CCL7,CD44,CD47,CDKN1A,CORO1A,MGST1,OSM,SLC11A1,SPP1 (includes EG:100359743),TNFRSF18                              | 10 |
| Immune Cell Trafficking                       | activation of T lymphocytes             | 2.17E-05 | CCL7,CD44,CD47,CDKN1A,CORO1A,MGST1,OSM,SLC11A1,SPP1 (includes EG:100359743),TNFRSF18                              | 10 |
| Inflammatory Response                         | activation of T lymphocytes             | 2.17E-05 | CCL7,CD44,CD47,CDKN1A,CORO1A,MGST1,OSM,SLC11A1,SPP1 (includes EG:100359743),TNFRSF18                              | 10 |
| Cell-To-Cell Signaling and Interaction        | activation of T lymphocytes             | 2.17E-05 | CCL7,CD44,CD47,CDKN1A,CORO1A,MGST1,OSM,SLC11A1,SPP1 (includes EG:100359743),TNFRSF18                              | 10 |
| Cell Morphology                               | morphology of leukocytes                | 2.37E-05 | CCL7,CCR5,CDKN1A,CEBPB (includes EG:1051),CHI3L1,CP,SELP,SOAT1,SPP1 (includes EG:100359743),SRGN                  | 10 |
| Cancer                                        | growth of tumor                         | 2.48E-05 | BST2,CASP1,CD44,CDKN1A,HIF1A,INHBA,OSM,SELP,SPP1 (includes EG:100359743),TNFRSF18                                 | 10 |
| Hematological System Development and Function | engulfment of myeloid cells             | 2.60E-05 | CD44,CD47,CEBPB (includes EG:1051),CORO1A,PADI4,SIRPA                                                             | 6  |
| Cellular Function and Maintenance             | engulfment of myeloid cells             | 2.60E-05 | CD44,CD47,CEBPB (includes EG:1051),CORO1A,PADI4,SIRPA                                                             | 6  |
| Infectious Disease                            | Chagas disease                          | 2.60E-05 | CCR5,CXCR4                                                                                                        | 2  |
| Cardiovascular Disease                        | Chagas disease                          | 2.60E-05 | CCR5,CXCR4                                                                                                        | 2  |
| Hematological Disease                         | Chagas disease                          | 2.60E-05 | CCR5,CXCR4                                                                                                        | 2  |
| Neurological Disease                          | Chagas disease                          | 2.60E-05 | CCR5,CXCR4                                                                                                        | 2  |
| Cellular Movement                             | dissemination of lymphoma cell lines    | 2.60E-05 | CD47,SIRPA                                                                                                        | 2  |
| Tissue Morphology                             | morphology of oval cells                | 2.60E-05 | OSM,OSMR                                                                                                          | 2  |
| Cell Morphology                               | morphology of oval cells                | 2.60E-05 | OSM,OSMR                                                                                                          | 2  |
| Hepatic System Development and Function       | morphology of oval cells                | 2.60E-05 | OSM,OSMR                                                                                                          | 2  |
| Organ Morphology                              | morphology of oval cells                | 2.60E-05 | OSM,OSMR                                                                                                          | 2  |
| Digestive System Development and Function     | morphology of oval cells                | 2.60E-05 | OSM,OSMR                                                                                                          | 2  |
| Cell Morphology                               | multinucleation of alveolar macrophages | 2.60E-05 | CD44,SPP1 (includes EG:100359743)                                                                                 | 2  |
| Cellular Compromise                           | multinucleation of alveolar macrophages | 2.60E-05 | CD44,SPP1 (includes EG:100359743)                                                                                 | 2  |
| Protein Synthesis                             | production of green fluorescent protein | 2.60E-05 | CCR5,CEBPB (includes EG:1051)                                                                                     | 2  |

|                                               |                                |          |                                                                                                                                    |    |
|-----------------------------------------------|--------------------------------|----------|------------------------------------------------------------------------------------------------------------------------------------|----|
| Organismal Injury and Abnormalities           | fibrosis                       | 2.75E-05 | CASP1,CCR5,CEBPB (includes EG:1051),HIF1A,INHBA,OSM,PLAT,SELP,SOAT1,SOCS3,SPP1 (includes EG:100359743),THBS2                       | 12 |
| Cancer                                        | genital tumor                  | 2.86E-05 | CD44,CDKN1A,CFB,CHI3L1,CP,CXCR4,DAB2,GPRC5A,IER3,IFITM2,INHBA,LRIG1,PTPN1,S100A8,SLPI,SOCS3,SPP1 (includes EG:100359743)           | 17 |
| Reproductive System Disease                   | genital tumor                  | 2.86E-05 | CD44,CDKN1A,CFB,CHI3L1,CP,CXCR4,DAB2,GPRC5A,IER3,IFITM2,INHBA,LRIG1,PTPN1,S100A8,SLPI,SOCS3,SPP1 (includes EG:100359743)           | 17 |
| Hematological System Development and Function | immune response of neutrophils | 2.93E-05 | CD44,CD47,CORO1A,CXCL1,PADI4                                                                                                       | 5  |
| Inflammatory Response                         | immune response of neutrophils | 2.93E-05 | CD44,CD47,CORO1A,CXCL1,PADI4                                                                                                       | 5  |
| Cell-To-Cell Signaling and Interaction        | immune response of neutrophils | 2.93E-05 | CD44,CD47,CORO1A,CXCL1,PADI4                                                                                                       | 5  |
| Molecular Transport                           | quantity of metal              | 3.00E-05 | CCL7,CCR5,CP,CXCR4,FPR2 (includes EG:100426968),GNA14,OSM,RGS1,S100A8,SAA1,SELP,SPP1 (includes EG:100359743)                       | 12 |
| Cell Death and Survival                       | necrosis of liver              | 3.14E-05 | CDKN1A,CEBPB (includes EG:1051),IER3,INHBA,OSM,PTPN1,SELP,SOCS3                                                                    | 8  |
| Inflammatory Response                         | immune response of phagocytes  | 3.18E-05 | CD44,CD47,CEBPB (includes EG:1051),CORO1A,CXCL1,OSM,PADI4                                                                          | 7  |
| Cell-To-Cell Signaling and Interaction        | immune response of phagocytes  | 3.18E-05 | CD44,CD47,CEBPB (includes EG:1051),CORO1A,CXCL1,OSM,PADI4                                                                          | 7  |
| Cellular Function and Maintenance             | organization of cytoskeleton   | 3.23E-05 | BST2,CCL7,CCR5,CD44,CD47,CDKN1A,CORO1A,CXCL1,CXCR4,GDA,INHBA,MSN,PLAT,PLEK,PTPN1,RAP1G AP,SIRPA,SPP1 (includes EG:100359743),SULF2 | 19 |
| Cellular Assembly and Organization            | organization of cytoskeleton   | 3.23E-05 | BST2,CCL7,CCR5,CD44,CD47,CDKN1A,CORO1A,CXCL1,CXCR4,GDA,INHBA,MSN,PLAT,PLEK,PTPN1,RAP1G AP,SIRPA,SPP1 (includes EG:100359743),SULF2 | 19 |
| Cancer                                        | polycystic kidney disease      | 3.31E-05 | CDKN1A,FSTL1,FXYD5,HIF1A,SAMSN1,SPP1 (includes EG:100359743)                                                                       | 6  |
| Developmental Disorder                        | polycystic kidney disease      | 3.31E-05 | CDKN1A,FSTL1,FXYD5,HIF1A,SAMSN1,SPP1 (includes EG:100359743)                                                                       | 6  |
| Hereditary Disorder                           | polycystic kidney disease      | 3.31E-05 | CDKN1A,FSTL1,FXYD5,HIF1A,SAMSN1,SPP1 (includes EG:100359743)                                                                       | 6  |
| Renal and Urological Disease                  | polycystic kidney disease      | 3.31E-05 | CDKN1A,FSTL1,FXYD5,HIF1A,SAMSN1,SPP1 (includes EG:100359743)                                                                       | 6  |
| Cancer                                        | ovarian adenocarcinoma         | 3.42E-05 | CP,DAB2,IFITM2,INHBA,LRIG1,SLPI,SPP1 (includes EG:100359743)                                                                       | 7  |
| Reproductive System Disease                   | ovarian adenocarcinoma         | 3.42E-05 | CP,DAB2,IFITM2,INHBA,LRIG1,SLPI,SPP1 (includes EG:100359743)                                                                       | 7  |
| Endocrine System Disorders                    | ovarian adenocarcinoma         | 3.42E-05 | CP,DAB2,IFITM2,INHBA,LRIG1,SLPI,SPP1 (includes EG:100359743)                                                                       | 7  |
| Cellular Function and Maintenance             | engulfment of phagocytes       | 3.47E-05 | CD44,CD47,CEBPB (includes EG:1051),CORO1A,PADI4,SIRPA                                                                              | 6  |
| Cancer                                        | metastasis of tumor            | 3.47E-05 | CD44,CD47,CXCL1,CXCR4,HIF1A,SPP1 (includes EG:100359743)                                                                           | 6  |
| Cancer                                        | hematological neoplasia        | 3.58E-05 | BST2,CASP1,CCL7,CD44,CDKN1A,CEBPB (includes EG:1051),CHRN1,CIITA,CXCL1,CXCR4,HIF1A,IER3,INHBA,OSMR,PTPN1,TGFB1                     | 16 |

|                                                        |                                       |          |                                                                                                                 |    |
|--------------------------------------------------------|---------------------------------------|----------|-----------------------------------------------------------------------------------------------------------------|----|
| Hematological Disease                                  | hematological neoplasia               | 3.58E-05 | BST2,CASP1,CCL7,CD44,CDKN1A,CEBPB (includes EG:1051),CHRNA1,CIITA,CXCL1,CXCR4,HIF1A,IER3,INHBA,OSMR,PTPN1,TGFBI | 16 |
| Cell Morphology                                        | shape change of leukocytes            | 3.59E-05 | CCL7,CD44,CD47,CORO1A,SAMSN1                                                                                    | 5  |
| Cell-To-Cell Signaling and Interaction                 | attachment of connective tissue cells | 3.59E-05 | SPP1 (includes EG:100359743),TGFBI,THBS2                                                                        | 3  |
| Tissue Development Hepatic System                      | attachment of connective tissue cells | 3.59E-05 | SPP1 (includes EG:100359743),TGFBI,THBS2                                                                        | 3  |
| Development and Function                               | morphology of liver                   | 3.85E-05 | CCR5,CDKN1A,CP,OSM,OSMR,SOAT1,SOCS3,SPP1 (includes EG:100359743)                                                | 8  |
| Organ Morphology Digestive System                      | morphology of liver                   | 3.85E-05 | CCR5,CDKN1A,CP,OSM,OSMR,SOAT1,SOCS3,SPP1 (includes EG:100359743)                                                | 8  |
| Development and Function                               | morphology of liver                   | 3.85E-05 | CCR5,CDKN1A,CP,OSM,OSMR,SOAT1,SOCS3,SPP1 (includes EG:100359743)                                                | 8  |
| Cell Death and Survival                                | cell death of cardiomyocytes          | 3.94E-05 | CASP1,CDKN1A,FSTL1,HIF1A,INHBA,SOCS3,THBS2                                                                      | 7  |
| Hematological System Development and Function          | abnormal morphology of macrophages    | 4.09E-05 | CCR5,CHI3L1,CP,SOAT1,SPP1 (includes EG:100359743)                                                               | 5  |
| Inflammatory Response                                  | abnormal morphology of macrophages    | 4.09E-05 | CCR5,CHI3L1,CP,SOAT1,SPP1 (includes EG:100359743)                                                               | 5  |
| Cell Morphology                                        | abnormal morphology of macrophages    | 4.09E-05 | CCR5,CHI3L1,CP,SOAT1,SPP1 (includes EG:100359743)                                                               | 5  |
| Protein Synthesis                                      | quantity of immunoglobulin            | 4.11E-05 | CCR5,CDKN1A,CEBPB (includes EG:1051),CHI3L1,CIITA,FPR2 (includes EG:100426968),RGS1,SAMSN1,SELP                 | 9  |
| Humoral Immune Response                                | quantity of immunoglobulin            | 4.11E-05 | CCR5,CDKN1A,CEBPB (includes EG:1051),CHI3L1,CIITA,FPR2 (includes EG:100426968),RGS1,SAMSN1,SELP                 | 9  |
| Organismal Survival                                    | mortality                             | 4.17E-05 | CASP1,CCR5,CDKN1A,HIF1A,SLPI,SOCS3                                                                              | 6  |
| Cellular Development Cellular Growth and Proliferation | proliferation of oval cells           | 4.55E-05 | CXCR4,OSM,OSMR                                                                                                  | 3  |
| Hepatic System Development and Function                | proliferation of oval cells           | 4.55E-05 | CXCR4,OSM,OSMR                                                                                                  | 3  |
| Inflammatory Response                                  | proliferation of oval cells           | 4.55E-05 | CXCR4,OSM,OSMR                                                                                                  | 3  |
| Cellular Development Cellular Growth and Proliferation | proliferation of oval cells           | 4.55E-05 | CXCR4,OSM,OSMR                                                                                                  | 3  |
| Inflammatory Response                                  | phagocytosis of blood cells           | 4.57E-05 | CD44,CD47,CEBPB (includes EG:1051),CORO1A,PADI4,SIRPA                                                           | 6  |
| Cell-To-Cell Signaling and Interaction                 | phagocytosis of blood cells           | 4.57E-05 | CD44,CD47,CEBPB (includes EG:1051),CORO1A,PADI4,SIRPA                                                           | 6  |
| Cellular Function and Maintenance                      | phagocytosis of blood cells           | 4.57E-05 | CD44,CD47,CEBPB (includes EG:1051),CORO1A,PADI4,SIRPA                                                           | 6  |
| Hematological System Development and Function          | phagocytosis of neutrophils           | 4.62E-05 | CD44,CD47,CORO1A,PADI4                                                                                          | 4  |
| Inflammatory Response                                  | phagocytosis of neutrophils           | 4.62E-05 | CD44,CD47,CORO1A,PADI4                                                                                          | 4  |
| Cell-To-Cell Signaling and Interaction                 | phagocytosis of neutrophils           | 4.62E-05 | CD44,CD47,CORO1A,PADI4                                                                                          | 4  |

|                                               |                                  |          |                                                                                                 |    |
|-----------------------------------------------|----------------------------------|----------|-------------------------------------------------------------------------------------------------|----|
| Cellular Function and Maintenance             | phagocytosis of neutrophils      | 4.62E-05 | CD44,CD47,CORO1A,PADI4                                                                          | 4  |
| Inflammatory Response                         | phagocytosis                     | 4.69E-05 | CD44,CD47,CEBPB (includes EG:1051),CORO1A,MSN,PADI4,SIRPA,SLC11A1                               | 8  |
| Cellular Function and Maintenance             | phagocytosis                     | 4.69E-05 | CD44,CD47,CEBPB (includes EG:1051),CORO1A,MSN,PADI4,SIRPA,SLC11A1                               | 8  |
| Developmental Disorder                        | congenital urogenital anomaly    | 4.69E-05 | CDKN1A,FSTL1,FXD5,HIF1A,INSL3,SAMSN1,SPP1 (includes EG:100359743)                               | 7  |
| Cellular Development                          | proliferation of cancer cells    | 4.74E-05 | CASP1,CD44,CXCL1,HIF1A,INHBA,OSM,PLAT,SOCS3,PP1 (includes EG:100359743)                         | 9  |
| Cellular Growth and Proliferation             | proliferation of cancer cells    | 4.74E-05 | CASP1,CD44,CXCL1,HIF1A,INHBA,OSM,PLAT,SOCS3,PP1 (includes EG:100359743)                         | 9  |
| Tumor Morphology                              | proliferation of cancer cells    | 4.74E-05 | CASP1,CD44,CXCL1,HIF1A,INHBA,OSM,PLAT,SOCS3,PP1 (includes EG:100359743)                         | 9  |
| Cardiovascular Disease                        | atherosclerosis                  | 4.81E-05 | CD44,CD47,CDKN1A,CHI3L1,LRIG1,S100A8,SELP,SOAT1,SOCS3,SPP1 (includes EG:100359743)              | 10 |
| Hematological System Development and Function | activation of myeloid cells      | 4.96E-05 | CCL7,CHI3L1,CXCL1,FPR2 (includes EG:100426968),S100A8,SLC11A1,SLPI,SPP1 (includes EG:100359743) | 8  |
| Immune Cell Trafficking                       | activation of myeloid cells      | 4.96E-05 | CCL7,CHI3L1,CXCL1,FPR2 (includes EG:100426968),S100A8,SLC11A1,SLPI,SPP1 (includes EG:100359743) | 8  |
| Inflammatory Response                         | activation of myeloid cells      | 4.96E-05 | CCL7,CHI3L1,CXCL1,FPR2 (includes EG:100426968),S100A8,SLC11A1,SLPI,SPP1 (includes EG:100359743) | 8  |
| Cell-To-Cell Signaling and Interaction        | activation of myeloid cells      | 4.96E-05 | CCL7,CHI3L1,CXCL1,FPR2 (includes EG:100426968),S100A8,SLC11A1,SLPI,SPP1 (includes EG:100359743) | 8  |
| Cellular Movement                             | emigration of leukocytes         | 5.11E-05 | CD44,CXCR4,SIRPA,SPP1 (includes EG:100359743)                                                   | 4  |
| Immune Cell Trafficking                       | emigration of leukocytes         | 5.11E-05 | CD44,CXCR4,SIRPA,SPP1 (includes EG:100359743)                                                   | 4  |
| Cancer                                        | thyroid cancer                   | 5.19E-05 | CDKN1A,CXCR4,RAP1GAP,SLPI,SOCS3,SPP1 (includes EG:100359743),TMPRSS4                            | 7  |
| Endocrine System Disorders                    | thyroid cancer                   | 5.19E-05 | CDKN1A,CXCR4,RAP1GAP,SLPI,SOCS3,SPP1 (includes EG:100359743),TMPRSS4                            | 7  |
| Protein Synthesis                             | quantity of cytokine             | 5.24E-05 | CASP1,CD44,CEBPB (includes EG:1051),PTPN1,SAMSN1,SELP,SOCS3,SPP1 (includes EG:100359743)        | 8  |
| Hematological System Development and Function | function of helper T lymphocytes | 5.26E-05 | CD44,CEBPB (includes EG:1051),CHI3L1,CIITA,SAMSN1                                               | 5  |
| Cellular Function and Maintenance             | function of helper T lymphocytes | 5.26E-05 | CD44,CEBPB (includes EG:1051),CHI3L1,CIITA,SAMSN1                                               | 5  |
| Cell Death and Survival                       | cell death of liver cells        | 5.37E-05 | CDKN1A,CEBPB (includes EG:1051),IER3,INHBA,OSM,PTPN1,SOCS3                                      | 7  |
| Immunological Disease                         | leukocytosis                     | 5.59E-05 | CASP1,CXCR4,SELP,SOCS3,SPP1 (includes EG:100359743)                                             | 5  |
| Organismal Injury and Abnormalities           | leukocytosis                     | 5.59E-05 | CASP1,CXCR4,SELP,SOCS3,SPP1 (includes EG:100359743)                                             | 5  |
| Hematological Disease                         | leukocytosis                     | 5.59E-05 | CASP1,CXCR4,SELP,SOCS3,SPP1 (includes EG:100359743)                                             | 5  |
| Cellular Movement                             | transmigration of phagocytes     | 5.59E-05 | CASP1,CXCR4,SELP,SOCS3,SPP1 (includes EG:100359743)                                             | 5  |
|                                               |                                  |          | CCL7,CD47,SIRPA,SLPI,SOCS3                                                                      | 5  |

|                                                |                                         |          |                                                                                                                     |    |
|------------------------------------------------|-----------------------------------------|----------|---------------------------------------------------------------------------------------------------------------------|----|
| Hematological System Development and Function  | transmigration of phagocytes            | 5.59E-05 | CCL7,CD47,SIRPA,SLPI,SOCS3                                                                                          | 5  |
| Immune Cell Trafficking                        | transmigration of phagocytes            | 5.59E-05 | CCL7,CD47,SIRPA,SLPI,SOCS3                                                                                          | 5  |
| Inflammatory Response                          | transmigration of phagocytes            | 5.59E-05 | CCL7,CD47,SIRPA,SLPI,SOCS3                                                                                          | 5  |
| Cellular Development                           | differentiation of cancer cells         | 5.64E-05 | CD44,CDKN1A,CEBPB (includes EG:1051),INHBA                                                                          | 4  |
| Cancer                                         | differentiation of cancer cells         | 5.64E-05 | CD44,CDKN1A,CEBPB (includes EG:1051),INHBA                                                                          | 4  |
| Tumor Morphology                               | differentiation of cancer cells         | 5.64E-05 | CD44,CDKN1A,CEBPB (includes EG:1051),INHBA                                                                          | 4  |
| Cell-To-Cell Signaling and Interaction         | binding of hepatoma cell lines          | 5.67E-05 | CD44,CXCR4,SPP1 (includes EG:100359743)                                                                             | 3  |
| Cellular Movement                              | extravasation of granulocytes           | 5.67E-05 | CD44,CXCL1,SELP                                                                                                     | 3  |
| Hematological System Development and Function  | extravasation of granulocytes           | 5.67E-05 | CD44,CXCL1,SELP                                                                                                     | 3  |
| Neurological Disease                           | peroxisomal acyl CoA oxidase deficiency | 5.67E-05 | CCL7,CEBPB (includes EG:1051),SPP1 (includes EG:100359743)                                                          | 3  |
| Hereditary Disorder                            | peroxisomal acyl CoA oxidase deficiency | 5.67E-05 | CCL7,CEBPB (includes EG:1051),SPP1 (includes EG:100359743)                                                          | 3  |
| Cardiovascular Disease                         | heart disease                           | 5.76E-05 | CASP1,CCR5,CD44,CD47,CDKN1A,CHI3L1,CHRN1,CXCR4,DUSP6,FSTL1,HIF1A,LRIG1,PLAT,SELP,SPP1 (includes EG:100359743),THBS2 | 16 |
| Cancer                                         | serous ovarian carcinoma process        | 5.92E-05 | CP,DAB2,IFITM2,LRIG1,SLPI,SPP1 (includes EG:100359743)                                                              | 6  |
| Reproductive System Disease                    | serous ovarian carcinoma process        | 5.92E-05 | CP,DAB2,IFITM2,LRIG1,SLPI,SPP1 (includes EG:100359743)                                                              | 6  |
| Endocrine System Disorders                     | serous ovarian carcinoma process        | 5.92E-05 | CP,DAB2,IFITM2,LRIG1,SLPI,SPP1 (includes EG:100359743)                                                              | 6  |
| Cell-To-Cell Signaling and Interaction         | adhesion of vascular endothelial cells  | 5.93E-05 | CD44,CXCR4,SELP,SPP1 (includes EG:100359743),TGFB1                                                                  | 5  |
| Tissue Development                             | adhesion of vascular endothelial cells  | 5.93E-05 | CD44,CXCR4,SELP,SPP1 (includes EG:100359743),TGFB1                                                                  | 5  |
| Cardiovascular System Development and Function | adhesion of vascular endothelial cells  | 5.93E-05 | CD44,CXCR4,SELP,SPP1 (includes EG:100359743),TGFB1                                                                  | 5  |
| Hematological System Development and Function  | function of neutrophils                 | 5.93E-05 | CASP1,CD47,FUT4,PADI4,SELP                                                                                          | 5  |
| Cellular Function and Maintenance              | function of neutrophils                 | 5.93E-05 | CASP1,CD47,FUT4,PADI4,SELP                                                                                          | 5  |
| Cancer                                         | ovarian cancer                          | 6.13E-05 | CD44,CDKN1A,CHI3L1,CP,DAB2,IFITM2,INHBA,LRIG1,PTPN1,SLPI,SPP1 (includes EG:100359743)                               | 11 |
| Reproductive System Disease                    | ovarian cancer                          | 6.13E-05 | CD44,CDKN1A,CHI3L1,CP,DAB2,IFITM2,INHBA,LRIG1,PTPN1,SLPI,SPP1 (includes EG:100359743)                               | 11 |

|                                                       |                              |          |                                                                                                   |    |
|-------------------------------------------------------|------------------------------|----------|---------------------------------------------------------------------------------------------------|----|
| Endocrine System Disorders                            | ovarian cancer               | 6.13E-05 | CD44,CDKN1A,CHI3L1,CP,DAB2,IFITM2,INHBA,LRIG1,PTPN1,SLPI,SPP1 (includes EG:100359743)             | 11 |
| Connective Tissue Development and Function            | resorption of bone           | 6.18E-05 | CD44,CD47,CEBPB (includes EG:1051),CXCR4,OSM,SPP1 (includes EG:100359743)                         | 6  |
| Skeletal and Muscular System Development and Function | resorption of bone           | 6.18E-05 | CD44,CD47,CEBPB (includes EG:1051),CXCR4,OSM,SPP1 (includes EG:100359743)                         | 6  |
| Organ Development                                     | resorption of bone           | 6.18E-05 | CD44,CD47,CEBPB (includes EG:1051),CXCR4,OSM,SPP1 (includes EG:100359743)                         | 6  |
| Hematological System Development and Function         | activation of neutrophils    | 6.29E-05 | CCL7,CXCL1,FPR2 (includes EG:100426968),SLPI,SPP1 (includes EG:100359743)                         | 5  |
| Immune Cell Trafficking                               | activation of neutrophils    | 6.29E-05 | CCL7,CXCL1,FPR2 (includes EG:100426968),SLPI,SPP1 (includes EG:100359743)                         | 5  |
| Inflammatory Response                                 | activation of neutrophils    | 6.29E-05 | CCL7,CXCL1,FPR2 (includes EG:100426968),SLPI,SPP1 (includes EG:100359743)                         | 5  |
| Cell-To-Cell Signaling and Interaction                | activation of neutrophils    | 6.29E-05 | CCL7,CXCL1,FPR2 (includes EG:100426968),SLPI,SPP1 (includes EG:100359743)                         | 5  |
| Cellular Movement                                     | recruitment of macrophages   | 6.29E-05 | CCL7,CCR5,CD44,SPP1 (includes EG:100359743),THBS2                                                 | 5  |
| Hematological System Development and Function         | recruitment of macrophages   | 6.29E-05 | CCL7,CCR5,CD44,SPP1 (includes EG:100359743),THBS2                                                 | 5  |
| Immune Cell Trafficking                               | recruitment of macrophages   | 6.29E-05 | CCL7,CCR5,CD44,SPP1 (includes EG:100359743),THBS2                                                 | 5  |
| Inflammatory Response                                 | recruitment of macrophages   | 6.29E-05 | CCL7,CCR5,CD44,SPP1 (includes EG:100359743),THBS2                                                 | 5  |
| Cell-To-Cell Signaling and Interaction                | recruitment of macrophages   | 6.29E-05 | CCL7,CCR5,CD44,SPP1 (includes EG:100359743),THBS2                                                 | 5  |
| Cancer                                                | renal cancer                 | 6.53E-05 | CCL7,CD44,CHRN1,CP,DUSP6,HIF1A,RAP1GAP,SAAL,SELP                                                  | 9  |
| Renal and Urological Disease                          | renal cancer                 | 6.53E-05 | CCL7,CD44,CHRN1,CP,DUSP6,HIF1A,RAP1GAP,SAAL,SELP                                                  | 9  |
| Carbohydrate Metabolism                               | binding of hyaluronic acid   | 6.95E-05 | CD44,OSM,SPP1 (includes EG:100359743)                                                             | 3  |
| Small Molecule Biochemistry                           | binding of hyaluronic acid   | 6.95E-05 | CD44,OSM,SPP1 (includes EG:100359743)                                                             | 3  |
| Drug Metabolism                                       | binding of hyaluronic acid   | 6.95E-05 | CD44,OSM,SPP1 (includes EG:100359743)                                                             | 3  |
| Cellular Movement                                     | migration of melanoma cells  | 6.95E-05 | CD47,CXCR4,SIRPA                                                                                  | 3  |
| Cellular Movement                                     | cell movement of tumor cells | 7.00E-05 | CD44,CD47,CXCR4,SIRPA,SLPI,SPP1 (includes EG:100359743)                                           | 6  |
| Lymphoid Tissue Structure and Development             | morphology of lymphoid organ | 7.42E-05 | BST2,CD47,CDKN1A,CEBPB (includes EG:1051),CIITA,FPR2 (includes EG:100426968),FUT4,RGS1,SELP,TGFBI | 10 |
| Organ Morphology                                      | morphology of lymphoid organ | 7.42E-05 | BST2,CD47,CDKN1A,CEBPB (includes EG:1051),CIITA,FPR2 (includes EG:100426968),FUT4,RGS1,SELP,TGFBI | 10 |



|                                   |                                            |          |                                                                                                                        |    |
|-----------------------------------|--------------------------------------------|----------|------------------------------------------------------------------------------------------------------------------------|----|
|                                   | antiapoptosis of stomach cancer cell lines | 7.78E-05 | CD44,SPP1 (includes EG:100359743)                                                                                      | 2  |
| Cell Death and Survival           |                                            |          |                                                                                                                        |    |
| Skeletal and Muscular Disorders   | infection of smooth muscle cells           | 7.78E-05 | CCR5,CXCR4                                                                                                             | 2  |
| Infectious Disease                | infection of smooth muscle cells           | 7.78E-05 | CCR5,CXCR4                                                                                                             | 2  |
| Cancer                            | laryngeal squamous cell carcinoma          | 7.78E-05 | CD44,SPP1 (includes EG:100359743)                                                                                      | 2  |
| Tissue Morphology                 | mass of lymph node                         | 7.78E-05 | BST2,CDKN1A                                                                                                            | 2  |
| Organ Morphology                  | mass of lymph node                         | 7.78E-05 | BST2,CDKN1A                                                                                                            | 2  |
| Cellular Function and Maintenance | transcytosis of HIV-1                      | 7.78E-05 | CCR5,CXCR4                                                                                                             | 2  |
| Infectious Disease                | transcytosis of HIV-1                      | 7.78E-05 | CCR5,CXCR4                                                                                                             | 2  |
| Molecular Transport               | transcytosis of HIV-1                      | 7.78E-05 | CCR5,CXCR4                                                                                                             | 2  |
| Hematological System              |                                            |          |                                                                                                                        |    |
| Development and Function          | function of Th1 cells                      | 8.18E-05 | CD44,CEBPB (includes EG:1051),CIITA,SAMSN1                                                                             | 4  |
| Cellular Function and Maintenance | function of Th1 cells                      | 8.18E-05 | CD44,CEBPB (includes EG:1051),CIITA,SAMSN1                                                                             | 4  |
| Hematological System              |                                            |          |                                                                                                                        |    |
| Development and Function          | function of Th2 cells                      | 8.18E-05 | CD44,CEBPB (includes EG:1051),CHI3L1,SAMSN1                                                                            | 4  |
| Cellular Function and Maintenance | function of Th2 cells                      | 8.18E-05 | CD44,CEBPB (includes EG:1051),CHI3L1,SAMSN1                                                                            | 4  |
| Cellular Movement                 | transmigration of granulocytes             | 8.18E-05 | CD47,SIRPA,SLPI,SOCS3                                                                                                  | 4  |
| Hematological System              |                                            |          |                                                                                                                        |    |
| Development and Function          | transmigration of granulocytes             | 8.18E-05 | CD47,SIRPA,SLPI,SOCS3                                                                                                  | 4  |
| Immune Cell Trafficking           | transmigration of granulocytes             | 8.18E-05 | CD47,SIRPA,SLPI,SOCS3                                                                                                  | 4  |
| Cell Death and Survival           | apoptosis of macrophages                   | 8.35E-05 | CASP1,CDKN1A,CEBPB (includes EG:1051),HIF1A,SOAT1                                                                      | 5  |
| Cellular Movement                 | cell movement of embryonic cell lines      | 8.35E-05 | CCR5,CXCL1,CXCR4,FPR2 (includes EG:100426968),SAA1                                                                     | 5  |
| Embryonic Development             | cell movement of embryonic cell lines      | 8.35E-05 | CCR5,CXCL1,CXCR4,FPR2 (includes EG:100426968),SAA1                                                                     | 5  |
| Cancer                            | pancreatic cancer                          | 8.40E-05 | CASP1,CDKN1A,CHRN1A,CXCR4,HIF1A,PLAT,S100A8, SPP1 (includes EG:100359743)                                              | 8  |
| Gastrointestinal Disease          | pancreatic cancer                          | 8.40E-05 | CASP1,CDKN1A,CHRN1A,CXCR4,HIF1A,PLAT,S100A8, SPP1 (includes EG:100359743)                                              | 8  |
| Endocrine System Disorders        | pancreatic cancer                          | 8.40E-05 | CASP1,CDKN1A,CHRN1A,CXCR4,HIF1A,PLAT,S100A8, SPP1 (includes EG:100359743)                                              | 8  |
| Cellular Movement                 | transmigration of tumor cell lines         | 8.41E-05 | CD44,CXCR4,RAP1GAP                                                                                                     | 3  |
| Cancer                            | adenocarcinoma                             | 8.47E-05 | CDKN1A,CFB,CP,CXCR4,DAB2,GPRC5A,HIF1A,IFITM2, INHBA,LRIG1,RAP1GAP,SAA1,SLPI,SPP1 (includes EG:100359743),TGFB1,TNFAIP2 | 16 |
| Hematological System              |                                            |          |                                                                                                                        |    |
| Development and Function          | T cell development                         | 8.61E-05 | CASP1,CDKN1A,CEBPB (includes EG:1051),CIITA,CXCR4,HIF1A,INHBA,OSM,SIRPA,SOC S3,SPP1 (includes EG:100359743)            | 11 |
| Cellular Function and Maintenance | T cell development                         | 8.61E-05 | CASP1,CDKN1A,CEBPB (includes EG:1051),CIITA,CXCR4,HIF1A,INHBA,OSM,SIRPA,SOC S3,SPP1 (includes EG:100359743)            | 11 |
| Cellular Development              | T cell development                         | 8.61E-05 | CASP1,CDKN1A,CEBPB (includes EG:1051),CIITA,CXCR4,HIF1A,INHBA,OSM,SIRPA,SOC S3,SPP1 (includes EG:100359743)            | 11 |

|                                               |                                               |          |                                                                                                             |    |
|-----------------------------------------------|-----------------------------------------------|----------|-------------------------------------------------------------------------------------------------------------|----|
| Cell-mediated Immune Response                 | T cell development                            | 8.61E-05 | CASP1,CDKN1A,CEBPB (includes EG:1051),CIITA,CXCR4,HIF1A,INHBA,OSM,SIRPA,SOC S3,SPP1 (includes EG:100359743) | 11 |
| Lymphoid Tissue Structure and Development     | T cell development                            | 8.61E-05 | CASP1,CDKN1A,CEBPB (includes EG:1051),CIITA,CXCR4,HIF1A,INHBA,OSM,SIRPA,SOC S3,SPP1 (includes EG:100359743) | 11 |
| Hematopoiesis                                 | T cell development                            | 8.61E-05 | CASP1,CDKN1A,CEBPB (includes EG:1051),CIITA,CXCR4,HIF1A,INHBA,OSM,SIRPA,SOC S3,SPP1 (includes EG:100359743) | 11 |
| Cell Morphology                               | polarization of cells                         | 8.89E-05 | CCR5,CD47,RAP1GAP,SAMSN1,SIRPA,SOCS3                                                                        | 6  |
| Cellular Movement                             | localization of cells                         | 8.92E-05 | CD44,CXCR4,SELP,SOCS3                                                                                       | 4  |
| Cellular Function and Maintenance             | localization of cells                         | 8.92E-05 | CD44,CXCR4,SELP,SOCS3                                                                                       | 4  |
| Cellular Movement                             | invasion of tumor cell lines                  | 9.20E-05 | CD44,CXCR4,DAB2,FXYD5,HIF1A,LRIG1,PLAT,RAP1G AP,SEMA3F,SPP1 (includes EG:100359743),TGFB1                   | 11 |
| Hematological System Development and Function | function of T lymphocytes                     | 9.52E-05 | CCR5,CD44,CEBPB (includes EG:1051),CHI3L1,CIITA,SAMSN1,SELP,TNFRSF18                                        | 8  |
| Cellular Function and Maintenance             | function of T lymphocytes                     | 9.52E-05 | CCR5,CD44,CEBPB (includes EG:1051),CHI3L1,CIITA,SAMSN1,SELP,TNFRSF18                                        | 8  |
| Cellular Development                          | differentiation of leukemia cell lines        | 9.60E-05 | EG:1051),HIF1A,INHBA,OSM,PTPN1,SOCS3                                                                        | 6  |
| Cell Morphology                               | cell spreading of leukocytes                  | 9.71E-05 | CD44,CD47,CORO1A,SAMSN1                                                                                     | 4  |
| Lymphoid Tissue Structure and Development     | morphology of B-cell follicle                 | 9.71E-05 | CEBPB (includes EG:1051),CXCR4,FUT4,SELP                                                                    | 4  |
| Cellular Movement                             | cell movement of peripheral blood lymphocytes | 1.01E-04 | CCR5,CXCR4,RGS1                                                                                             | 3  |
| Hematological System Development and Function | cell movement of peripheral blood lymphocytes | 1.01E-04 | CCR5,CXCR4,RGS1                                                                                             | 3  |
| Immune Cell Trafficking                       | cell movement of peripheral blood lymphocytes | 1.01E-04 | CCR5,CXCR4,RGS1                                                                                             | 3  |
| Cellular Movement                             | migration of Langerhans cells                 | 1.01E-04 | CD44,SIRPA,SPP1 (includes EG:100359743)                                                                     | 3  |
| Hematological System Development and Function | migration of Langerhans cells                 | 1.01E-04 | CD44,SIRPA,SPP1 (includes EG:100359743)                                                                     | 3  |
| Immune Cell Trafficking                       | migration of Langerhans cells                 | 1.01E-04 | CD44,SIRPA,SPP1 (includes EG:100359743)                                                                     | 3  |
| Inflammatory Response                         | migration of Langerhans cells                 | 1.01E-04 | CD44,SIRPA,SPP1 (includes EG:100359743)                                                                     | 3  |
| Cellular Development                          | proliferation of carcinoma cell lines         | 1.02E-04 | CDKN1A,CXCR4,DAB2,INHBA,PADI4,RAP1GAP,SPP1 (includes EG:100359743),THBS2                                    | 8  |
| Cellular Growth and Proliferation             | proliferation of carcinoma cell lines         | 1.02E-04 | CDKN1A,CXCR4,DAB2,INHBA,PADI4,RAP1GAP,SPP1 (includes EG:100359743),THBS2                                    | 8  |
| Hematological System Development and Function | accumulation of granulocytes                  | 1.03E-04 | CCL7,OSM,S100A8,SELP,SLPI                                                                                   | 5  |
| Immune Cell Trafficking                       | accumulation of granulocytes                  | 1.03E-04 | CCL7,OSM,S100A8,SELP,SLPI                                                                                   | 5  |
| Inflammatory Response                         | accumulation of granulocytes                  | 1.03E-04 | CCL7,OSM,S100A8,SELP,SLPI                                                                                   | 5  |

|                                               |                                       |          |                                                                                                                 |    |
|-----------------------------------------------|---------------------------------------|----------|-----------------------------------------------------------------------------------------------------------------|----|
| Tissue Development                            | accumulation of granulocytes          | 1.03E-04 | CCL7,OSM,S100A8,SELP,SLPI                                                                                       | 5  |
| Cancer                                        | hyperplasia                           | 1.04E-04 | CDKN1A,CEBPB (includes EG:1051),CP,DUSP6,FSTL1,LRIG1,OSM,PTPN1,SELP,S LPI,SPP1 (includes EG:100359743),TNFRSF18 | 12 |
| Cancer                                        | pancreatic adenocarcinoma             | 1.06E-04 | CDKN1A,HIF1A,PLAT,SPP1 (includes EG:100359743)                                                                  | 4  |
| Gastrointestinal Disease                      | pancreatic adenocarcinoma             | 1.06E-04 | CDKN1A,HIF1A,PLAT,SPP1 (includes EG:100359743)                                                                  | 4  |
| Endocrine System Disorders                    | pancreatic adenocarcinoma             | 1.06E-04 | CDKN1A,HIF1A,PLAT,SPP1 (includes EG:100359743)                                                                  | 4  |
| Cell Death and Survival                       | apoptosis of liver cells              | 1.08E-04 | CDKN1A,CEBPB (includes EG:1051),INHBA,OSM,PTPN1,SOCS3                                                           | 6  |
| Connective Tissue Disorders                   | experimentally-induced arthritis      | 1.08E-04 | CCR5,CD44,CFB,PLAT,SELP,SPP1 (includes EG:100359743)                                                            | 6  |
| Inflammatory Disease                          | experimentally-induced arthritis      | 1.08E-04 | CCR5,CD44,CFB,PLAT,SELP,SPP1 (includes EG:100359743)                                                            | 6  |
| Skeletal and Muscular Disorders               | experimentally-induced arthritis      | 1.08E-04 | CCR5,CD44,CFB,PLAT,SELP,SPP1 (includes EG:100359743)                                                            | 6  |
| Hematological System Development and Function | quantity of B lymphocytes             | 1.09E-04 | CDKN1A,CEBPB (includes EG:1051),CXCR4,HIF1A,INHBA,RGS1,SAMSN1,SPP1 (includes EG:100359743),TGFB1                | 9  |
| Tissue Morphology                             | quantity of B lymphocytes             | 1.09E-04 | CDKN1A,CEBPB (includes EG:1051),CXCR4,HIF1A,INHBA,RGS1,SAMSN1,SPP1 (includes EG:100359743),TGFB1                | 9  |
| Humoral Immune Response                       | quantity of B lymphocytes             | 1.09E-04 | CDKN1A,CEBPB (includes EG:1051),CXCR4,HIF1A,INHBA,RGS1,SAMSN1,SPP1 (includes EG:100359743),TGFB1                | 9  |
| Cell Signaling                                | quantity of Ca <sup>2+</sup>          | 1.12E-04 | CCL7,CCR5,CXCR4,FPR2 (includes EG:100426968),GNA14,RGS1,S100A8,SAA1,SELP,SPP 1 (includes EG:100359743)          | 10 |
| Molecular Transport                           | quantity of Ca <sup>2+</sup>          | 1.12E-04 | CCL7,CCR5,CXCR4,FPR2 (includes EG:100426968),GNA14,RGS1,S100A8,SAA1,SELP,SPP 1 (includes EG:100359743)          | 10 |
| Vitamin and Mineral Metabolism                | quantity of Ca <sup>2+</sup>          | 1.12E-04 | CCL7,CCR5,CXCR4,FPR2 (includes EG:100426968),GNA14,RGS1,S100A8,SAA1,SELP,SPP 1 (includes EG:100359743)          | 10 |
| Carbohydrate Metabolism                       | metabolism of polysaccharide          | 1.13E-04 | CD44,CEBPB (includes EG:1051),PTPN1,SOCS3,SPP1 (includes EG:100359743),SRGN,SULF2                               | 7  |
| Hematological System Development and Function | adhesion of granulocytes              | 1.15E-04 | CD44,CORO1A,FPR2 (includes EG:100426968),S100A8,SELP                                                            | 5  |
| Immune Cell Trafficking                       | adhesion of granulocytes              | 1.15E-04 | CD44,CORO1A,FPR2 (includes EG:100426968),S100A8,SELP                                                            | 5  |
| Cell-To-Cell Signaling and Interaction        | adhesion of granulocytes              | 1.15E-04 | CD44,CORO1A,FPR2 (includes EG:100426968),S100A8,SELP                                                            | 5  |
| Tissue Development                            | adhesion of granulocytes              | 1.15E-04 | CD44,CORO1A,FPR2 (includes EG:100426968),S100A8,SELP                                                            | 5  |
| Cellular Movement                             | recruitment of mononuclear leukocytes | 1.15E-04 | CASP1,CCL7,CD44,CXCR4,SELP                                                                                      | 5  |

|                                               |                                       |          |                                                                                                                                                                                   |    |
|-----------------------------------------------|---------------------------------------|----------|-----------------------------------------------------------------------------------------------------------------------------------------------------------------------------------|----|
| Hematological System Development and Function | recruitment of mononuclear leukocytes | 1.15E-04 | CASP1,CCL7,CD44,CXCR4,SELP                                                                                                                                                        | 5  |
| Immune Cell Trafficking                       | recruitment of mononuclear leukocytes | 1.15E-04 | CASP1,CCL7,CD44,CXCR4,SELP                                                                                                                                                        | 5  |
| Cell-To-Cell Signaling and Interaction        | recruitment of mononuclear leukocytes | 1.15E-04 | CASP1,CCL7,CD44,CXCR4,SELP                                                                                                                                                        | 5  |
| Cell Morphology                               | cell spreading of lymphocytes         | 1.19E-04 | CD44,CD47,SAMSN1                                                                                                                                                                  | 3  |
| Cellular Movement                             | migration of hepatic stellate cells   | 1.19E-04 | CCR5,CD44,SPP1 (includes EG:100359743)                                                                                                                                            | 3  |
| Connective Tissue Development and Function    | migration of hepatic stellate cells   | 1.19E-04 | CCR5,CD44,SPP1 (includes EG:100359743)                                                                                                                                            | 3  |
| Hepatic System Development and Function       | migration of hepatic stellate cells   | 1.19E-04 | CCR5,CD44,SPP1 (includes EG:100359743)<br>CDKN1A,CEBPB (includes EG:1051),DAB2,HIF1A,INHBA,OSM,PLAT,PTPN1,SOC                                                                     | 3  |
| Cellular Development                          | differentiation of tumor cell lines   | 1.24E-04 | S3                                                                                                                                                                                | 9  |
| Organismal Injury and Abnormalities           | damage of kidney                      | 1.27E-04 | CD44,CFB,FUT4,PLAT,SELP                                                                                                                                                           | 5  |
| Renal and Urological Disease                  | damage of kidney                      | 1.27E-04 | CD44,CFB,FUT4,PLAT,SELP                                                                                                                                                           | 5  |
| Cancer                                        | digestive organ tumor                 | 1.39E-04 | BST2,CASP1,CD44,CDKN1A,CEBPB (includes EG:1051),CHRN1,CP,CXCL1,CXCR4,DUSP6,FUT4,GP<br>RC5A,HIF1A,INHBA,OSM,OSMR,PLAT,RAP1GAP,S100<br>A8,SEMA3F,SOCS3,SPP1 (includes EG:100359743) | 22 |
| Gastrointestinal Disease                      | digestive organ tumor                 | 1.39E-04 | BST2,CASP1,CD44,CDKN1A,CEBPB (includes EG:1051),CHRN1,CP,CXCL1,CXCR4,DUSP6,FUT4,GP<br>RC5A,HIF1A,INHBA,OSM,OSMR,PLAT,RAP1GAP,S100<br>A8,SEMA3F,SOCS3,SPP1 (includes EG:100359743) | 22 |
| Lymphoid Tissue Structure and Development     | abnormal morphology of lymphoid organ | 1.39E-04 | BST2,CD47,CDKN1A,CEBPB (includes EG:1051),CIITA,FPR2 (includes EG:100426968),FUT4,SELP,TGFBI                                                                                      | 9  |
| Organ Morphology                              | abnormal morphology of lymphoid organ | 1.39E-04 | BST2,CD47,CDKN1A,CEBPB (includes EG:1051),CIITA,FPR2 (includes EG:100426968),FUT4,SELP,TGFBI                                                                                      | 9  |
| Infectious Disease                            | replication of RNA virus              | 1.39E-04 | BST2,CCR5,CIITA,CXCR4,IFITM2,S100A8,SLPI,SOCS3,<br>SPP1 (includes EG:100359743),SULF2,TNFRSF18                                                                                    | 11 |
| Cell Death and Survival                       | cell death of peritoneal macrophages  | 1.39E-04 | CASP1,CEBPB (includes EG:1051),SOAT1                                                                                                                                              | 3  |
| Inflammatory Disease                          | airway hyperresponsiveness            | 1.40E-04 | CD44,CXCR4,PLAT,SLPI,SOCS3                                                                                                                                                        | 5  |
| Respiratory Disease                           | airway hyperresponsiveness            | 1.40E-04 | CD44,CXCR4,PLAT,SLPI,SOCS3                                                                                                                                                        | 5  |
| Hematological System Development and Function | interaction of leukocytes             | 1.40E-04 | CCR5,CD47,MSN,SAA1,SELP                                                                                                                                                           | 5  |
| Cell-To-Cell Signaling and Interaction        | interaction of leukocytes             | 1.40E-04 | CCR5,CD47,MSN,SAA1,SELP                                                                                                                                                           | 5  |
| Tissue Development                            | interaction of leukocytes             | 1.40E-04 | CCR5,CD47,MSN,SAA1,SELP                                                                                                                                                           | 5  |

|                                               |                                                 |          |                                                                            |   |
|-----------------------------------------------|-------------------------------------------------|----------|----------------------------------------------------------------------------|---|
| Lymphoid Tissue Structure and Development     | morphology of lymph follicle                    | 1.40E-04 | CEBPB (includes EG:1051),CXCR4,FUT4,RGS1,SELP                              | 5 |
| Connective Tissue Disorders                   | collagen-induced arthritis                      | 1.47E-04 | CCR5,CD44,PLAT,SELP,SPP1 (includes EG:100359743)                           | 5 |
| Inflammatory Disease                          | collagen-induced arthritis                      | 1.47E-04 | CCR5,CD44,PLAT,SELP,SPP1 (includes EG:100359743)                           | 5 |
| Skeletal and Muscular Disorders               | collagen-induced arthritis                      | 1.47E-04 | CCR5,CD44,PLAT,SELP,SPP1 (includes EG:100359743)                           | 5 |
| Cell-To-Cell Signaling and Interaction        | fusion of cells                                 | 1.47E-04 | CASP1,CCR5,CD44,CXCR4,SIRPA                                                | 5 |
| Infectious Disease                            | Shigella infection                              | 1.55E-04 | CASP1,CD44                                                                 | 2 |
| Gastrointestinal Disease                      | Shigella infection                              | 1.55E-04 | CASP1,CD44                                                                 | 2 |
| Cellular Movement                             | dispersion of endocrine cell lines              | 1.55E-04 | CD44,SPP1 (includes EG:100359743)                                          | 2 |
| Endocrine System Development and Function     | dispersion of endocrine cell lines              | 1.55E-04 | CD44,SPP1 (includes EG:100359743)                                          | 2 |
| Hematological System Development and Function | formation of colony-forming erythroid cells     | 1.55E-04 | HIF1A,INHBA                                                                | 2 |
| Cellular Growth and Proliferation             | formation of colony-forming erythroid cells     | 1.55E-04 | HIF1A,INHBA                                                                | 2 |
| Hematopoiesis                                 | formation of colony-forming erythroid cells     | 1.55E-04 | HIF1A,INHBA                                                                | 2 |
| Cellular Movement                             | invasion of hybrid cells                        | 1.55E-04 | CXCR4,SPP1 (includes EG:100359743)                                         | 2 |
| Hematological System Development and Function | polarization of B-lymphocyte derived cell lines | 1.55E-04 | CD47,SIRPA                                                                 | 2 |
| Cell Morphology                               | polarization of B-lymphocyte derived cell lines | 1.55E-04 | CD47,SIRPA                                                                 | 2 |
| Hematological System Development and Function | quantity of dendritic cells                     | 1.62E-04 | CD47,CIITA,FPR2 (includes EG:100426968),SIRPA,SPP1 (includes EG:100359743) | 5 |
| Inflammatory Response                         | quantity of dendritic cells                     | 1.62E-04 | CD47,CIITA,FPR2 (includes EG:100426968),SIRPA,SPP1 (includes EG:100359743) | 5 |
| Tissue Morphology                             | quantity of dendritic cells                     | 1.62E-04 | CD47,CIITA,FPR2 (includes EG:100426968),SIRPA,SPP1 (includes EG:100359743) | 5 |
| Cell-To-Cell Signaling and Interaction        | binding of tumor cells                          | 1.62E-04 | CD44,CD47,SELP                                                             | 3 |
| Cancer                                        | binding of tumor cells                          | 1.62E-04 | CD44,CD47,SELP                                                             | 3 |
| Cellular Movement                             | cell movement of Th1 cells                      | 1.62E-04 | CD44,FUT4,SELP                                                             | 3 |
| Hematological System Development and Function | cell movement of Th1 cells                      | 1.62E-04 | CD44,FUT4,SELP                                                             | 3 |
| Immune Cell Trafficking                       | cell movement of Th1 cells                      | 1.62E-04 | CD44,FUT4,SELP                                                             | 3 |
| Cell-mediated Immune Response                 | cell movement of Th1 cells                      | 1.62E-04 | CD44,FUT4,SELP                                                             | 3 |
| Cellular Movement                             | cell rolling of neutrophils                     | 1.62E-04 | CD44,CXCL1,SELP                                                            | 3 |

|                                        |                                      |          |                                                                              |    |
|----------------------------------------|--------------------------------------|----------|------------------------------------------------------------------------------|----|
| Hematological System                   |                                      |          |                                                                              |    |
| Development and Function               | cell rolling of neutrophils          | 1.62E-04 | CD44,CXCL1,SELP                                                              | 3  |
| Immune Cell                            |                                      |          |                                                                              |    |
| Trafficking                            | cell rolling of neutrophils          | 1.62E-04 | CD44,CXCL1,SELP                                                              | 3  |
| Inflammatory                           |                                      |          |                                                                              |    |
| Response                               | cell rolling of neutrophils          | 1.62E-04 | CD44,CXCL1,SELP                                                              | 3  |
| Infectious Disease                     | infection of myeloid cells           | 1.62E-04 | CASP1,CCR5,CXCR4                                                             | 3  |
| Immunological                          |                                      |          |                                                                              |    |
| Disease                                | infection of myeloid cells           | 1.62E-04 | CASP1,CCR5,CXCR4                                                             | 3  |
| Hematological Disease                  | infection of myeloid cells           | 1.62E-04 | CASP1,CCR5,CXCR4                                                             | 3  |
| Cellular Movement                      | mobilization of phagocytes           | 1.62E-04 | CCL7,CCR5,CXCR4                                                              | 3  |
| Hematological System                   |                                      |          |                                                                              |    |
| Development and Function               | mobilization of phagocytes           | 1.62E-04 | CCL7,CCR5,CXCR4                                                              | 3  |
| Immune Cell                            |                                      |          |                                                                              |    |
| Trafficking                            | mobilization of phagocytes           | 1.62E-04 | CCL7,CCR5,CXCR4                                                              | 3  |
| Inflammatory                           |                                      |          |                                                                              |    |
| Response                               | mobilization of phagocytes           | 1.62E-04 | CCL7,CCR5,CXCR4                                                              | 3  |
| Cellular Function and Maintenance      | reorganization of cytoskeleton       | 1.65E-04 | BST2,CD44,CD47,MSN,PLEK,SPP1 (includes EG:100359743)                         | 6  |
| Cell Morphology                        | reorganization of cytoskeleton       | 1.65E-04 | BST2,CD44,CD47,MSN,PLEK,SPP1 (includes EG:100359743)                         | 6  |
| Cellular Assembly and Organization     | reorganization of cytoskeleton       | 1.65E-04 | BST2,CD44,CD47,MSN,PLEK,SPP1 (includes EG:100359743)                         | 6  |
| Cell-To-Cell Signaling and Interaction | binding of leukemia cell lines       | 1.68E-04 | CCR5,CD44,CD47,CXCR4                                                         | 4  |
| Cellular Movement                      | cell movement of melanoma cell lines | 1.68E-04 | CXCR4,MSN,RAP1GAP,SPP1 (includes EG:100359743)                               | 4  |
| Cellular Development                   | proliferation of breast cell lines   | 1.69E-04 | CEBPB (includes EG:1051),HIF1A,IER3,OSM,SPP1 (includes EG:100359743)         | 5  |
| Cellular Growth and Proliferation      | proliferation of breast cell lines   | 1.69E-04 | CEBPB (includes EG:1051),HIF1A,IER3,OSM,SPP1 (includes EG:100359743)         | 5  |
| Reproductive System                    |                                      |          |                                                                              |    |
| Development and Function               | proliferation of breast cell lines   | 1.69E-04 | CEBPB (includes EG:1051),HIF1A,IER3,OSM,SPP1 (includes EG:100359743)         | 5  |
| Cancer                                 | lymphomagenesis                      | 1.69E-04 | BST2,CD44,CDKN1A,CEBPB (includes EG:1051),CIITA,CXCR4,HIF1A,IER3,PTPN1,TGFBI | 10 |
| Hematological Disease                  | lymphomagenesis                      | 1.69E-04 | BST2,CD44,CDKN1A,CEBPB (includes EG:1051),CIITA,CXCR4,HIF1A,IER3,PTPN1,TGFBI | 10 |
| Inflammatory                           |                                      |          |                                                                              |    |
| Response                               | phagocytosis of cells                | 1.72E-04 | CD44,CD47,CEBPB (includes EG:1051),CORO1A,PADI4,SIRPA,SLC11A1                | 7  |
| Cell-To-Cell Signaling and Interaction | phagocytosis of cells                | 1.72E-04 | CD44,CD47,CEBPB (includes EG:1051),CORO1A,PADI4,SIRPA,SLC11A1                | 7  |
| Cellular Function and Maintenance      | phagocytosis of cells                | 1.72E-04 | CD44,CD47,CEBPB (includes EG:1051),CORO1A,PADI4,SIRPA,SLC11A1                | 7  |
| Organismal Injury and Abnormalities    | fibrosis of liver                    | 1.86E-04 | CCR5,CEBPB (includes EG:1051),OSM,SOCS3,SPP1 (includes EG:100359743)         | 5  |

|                                               |                                           |          |                                                                                                             |    |
|-----------------------------------------------|-------------------------------------------|----------|-------------------------------------------------------------------------------------------------------------|----|
| Gastrointestinal Disease                      | fibrosis of liver                         | 1.86E-04 | CCR5,CEBPB (includes EG:1051),OSM,SOCS3,SPP1 (includes EG:100359743)                                        | 5  |
| Hepatic System Disease                        | fibrosis of liver                         | 1.86E-04 | CCR5,CEBPB (includes EG:1051),OSM,SOCS3,SPP1 (includes EG:100359743)                                        | 5  |
| Protein Synthesis                             | quantity of protein in blood              | 1.86E-04 | APOBEC1,CASP1,CD44,CEBPB (includes EG:1051),CFB,PTPN1,SAMSN1,SELP,SOAT1,SOCS3,SP P1 (includes EG:100359743) | 11 |
| Tissue Development                            | fibrogenesis                              | 1.86E-04 | CD44,CDKN1A,CORO1A,DAB2,GDA,HIF1A,SA A1,SIRP A,TGFBI                                                        | 9  |
| Cellular Assembly and Organization            | fibrogenesis                              | 1.86E-04 | CD44,CDKN1A,CORO1A,DAB2,GDA,HIF1A,SA A1,SIRP A,TGFBI                                                        | 9  |
| Cellular Movement                             | extravasation of phagocytes               | 1.87E-04 | CCR5,CXCL1,SELP                                                                                             | 3  |
| Hematological System Development and Function | extravasation of phagocytes               | 1.87E-04 | CCR5,CXCL1,SELP                                                                                             | 3  |
| Cell Death and Survival                       | cell death of ovarian cancer cell lines   | 1.94E-04 | CASP1,CDKN1A,DAB2,SEMA3F,SLPI                                                                               | 5  |
| Cellular Development                          | proliferation of breast cancer cell lines | 2.05E-04 | CD44,CDKN1A,CXCR4,DAB2,IER3,INHBA,LRIG1,OSM, SPP1 (includes EG:100359743)                                   | 9  |
| Cellular Growth and Proliferation             | proliferation of breast cancer cell lines | 2.05E-04 | CD44,CDKN1A,CXCR4,DAB2,IER3,INHBA,LRIG1,OSM, SPP1 (includes EG:100359743)                                   | 9  |
| Cancer                                        | benign neoplasia                          | 2.09E-04 | APOBEC1,CCR5,CD44,CDKN1A,CHRN B1,HIF1A,MGST 1,S100A8,SLPI,SOCS3,SPP1 (includes EG:100359743),SPSB1,THBS2    | 13 |
| Cellular Movement                             | chemotaxis of peripheral blood leukocytes | 2.14E-04 | CCR5,CXCR4,FPR2 (includes EG:100426968)                                                                     | 3  |
| Hematological System Development and Function | chemotaxis of peripheral blood leukocytes | 2.14E-04 | CCR5,CXCR4,FPR2 (includes EG:100426968)                                                                     | 3  |
| Immune Cell Trafficking                       | chemotaxis of peripheral blood leukocytes | 2.14E-04 | CCR5,CXCR4,FPR2 (includes EG:100426968)                                                                     | 3  |
| Inflammatory Response                         | chemotaxis of peripheral blood leukocytes | 2.14E-04 | CCR5,CXCR4,FPR2 (includes EG:100426968)                                                                     | 3  |
| Cellular Movement                             | migration of peripheral blood leukocytes  | 2.14E-04 | CCL7,CCR5,RGS1                                                                                              | 3  |
| Hematological System Development and Function | migration of peripheral blood leukocytes  | 2.14E-04 | CCL7,CCR5,RGS1                                                                                              | 3  |
| Immune Cell Trafficking                       | migration of peripheral blood leukocytes  | 2.14E-04 | CCL7,CCR5,RGS1                                                                                              | 3  |
| Inflammatory Disease                          | Hepatitis                                 | 2.16E-04 | CASP1,CCL7,CCR5,CD44,CXCL1,SPP1 (includes EG:100359743)                                                     | 6  |
| Gastrointestinal Disease                      | Hepatitis                                 | 2.16E-04 | CASP1,CCL7,CCR5,CD44,CXCL1,SPP1 (includes EG:100359743)                                                     | 6  |
| Hepatic System Disease                        | Hepatitis                                 | 2.16E-04 | CASP1,CCL7,CCR5,CD44,CXCL1,SPP1 (includes EG:100359743)                                                     | 6  |
| Hematological System Development and Function | phagocytosis of myeloid cells             | 2.22E-04 | CD44,CD47,CEBPB (includes EG:1051),CORO1A,PADI4                                                             | 5  |
| Inflammatory Response                         | phagocytosis of myeloid cells             | 2.22E-04 | CD44,CD47,CEBPB (includes EG:1051),CORO1A,PADI4                                                             | 5  |

|                                                |                                             |          |                                                                                                     |    |
|------------------------------------------------|---------------------------------------------|----------|-----------------------------------------------------------------------------------------------------|----|
| Cell-To-Cell Signaling and Interaction         | phagocytosis of myeloid cells               | 2.22E-04 | CD44,CD47,CEBPB (includes EG:1051),CORO1A,PADI4                                                     | 5  |
| Cellular Function and Maintenance              | phagocytosis of myeloid cells               | 2.22E-04 | CD44,CD47,CEBPB (includes EG:1051),CORO1A,PADI4                                                     | 5  |
| Inflammatory Response                          | phagocytosis of phagocytes                  | 2.22E-04 | CD44,CD47,CEBPB (includes EG:1051),CORO1A,PADI4                                                     | 5  |
| Cell-To-Cell Signaling and Interaction         | phagocytosis of phagocytes                  | 2.22E-04 | CD44,CD47,CEBPB (includes EG:1051),CORO1A,PADI4                                                     | 5  |
| Cellular Function and Maintenance              | phagocytosis of phagocytes                  | 2.22E-04 | CD44,CD47,CEBPB (includes EG:1051),CORO1A,PADI4                                                     | 5  |
| Tissue Morphology                              | healing of wound                            | 2.23E-04 | CD44,PLAT,SLC11A1,SLPI,SPP1 (includes EG:100359743),THBS2                                           | 6  |
| Organismal Functions                           | healing of wound                            | 2.23E-04 | CD44,PLAT,SLC11A1,SLPI,SPP1 (includes EG:100359743),THBS2                                           | 6  |
| Cancer                                         | head and neck cancer                        | 2.29E-04 | APOBEC1,CCR5,CD44,CDKN1A,CHI3L1,CHRN1,CXCR4,PLAT,RAP1GAP,S100A8,SEMA3F,SPP1 (includes EG:100359743) | 12 |
| Cell-To-Cell Signaling and Interaction         | attachment of cells                         | 2.32E-04 | CD44,DAB2,SPP1 (includes EG:100359743),TGFB1,THBS2                                                  | 5  |
| Tissue Development                             | attachment of cells                         | 2.32E-04 | CD44,DAB2,SPP1 (includes EG:100359743),TGFB1,THBS2                                                  | 5  |
| Cellular Movement                              | cell movement of cancer cells               | 2.32E-04 | CD44,CD47,CXCR4,SIRPA,SPP1 (includes EG:100359743)                                                  | 5  |
| Cellular Development                           | proliferation of prostate cancer cell lines | 2.36E-04 | CASP1,CD44,CDKN1A,DAB2,HIF1A,INHBA,SOCS3                                                            | 7  |
| Cellular Growth and Proliferation              | proliferation of prostate cancer cell lines | 2.36E-04 | CASP1,CD44,CDKN1A,DAB2,HIF1A,INHBA,SOCS3                                                            | 7  |
| Cellular Movement                              | cell movement of natural killer cells       | 2.37E-04 | CCL7,CD44,SELP,SPP1 (includes EG:100359743)                                                         | 4  |
| Hematological System Development and Function  | cell movement of natural killer cells       | 2.37E-04 | CCL7,CD44,SELP,SPP1 (includes EG:100359743)                                                         | 4  |
| Immune Cell Trafficking                        | cell movement of natural killer cells       | 2.37E-04 | CCL7,CD44,SELP,SPP1 (includes EG:100359743)                                                         | 4  |
| Hematological Disease                          | blood protein disorder                      | 2.42E-04 | CCL7,CDKN1A,CHRN1,CXCL1,CXCR4,OSMR,PTPN1,IRPA                                                       | 8  |
| Cell Death and Survival                        | cell death of muscle cells                  | 2.42E-04 | CASP1,CDKN1A,DUSP6,FSTL1,HIF1A,INHBA,SOCS3,THBS2                                                    | 8  |
| Cellular Movement                              | migration of mammary tumor cells            | 2.44E-04 | CD44,CXCR4,SPP1 (includes EG:100359743)                                                             | 3  |
| Cancer                                         | mucinous ovarian cancer                     | 2.44E-04 | CP,SLPI,SPP1 (includes EG:100359743)                                                                | 3  |
| Reproductive System Disease                    | mucinous ovarian cancer                     | 2.44E-04 | CP,SLPI,SPP1 (includes EG:100359743)                                                                | 3  |
| Endocrine System Disorders                     | mucinous ovarian cancer                     | 2.44E-04 | CP,SLPI,SPP1 (includes EG:100359743)                                                                | 3  |
| Cellular Movement                              | cell movement of endothelial cells          | 2.47E-04 | CXCL1,CXCR4,FPR2 (includes EG:100426968),HIF1A,SAA1,SEMA3F,SPP1 (includes EG:100359743),TGFB1       | 8  |
| Cardiovascular System Development and Function | cell movement of endothelial cells          | 2.47E-04 | CXCL1,CXCR4,FPR2 (includes EG:100426968),HIF1A,SAA1,SEMA3F,SPP1 (includes EG:100359743),TGFB1       | 8  |
| Protein Synthesis                              | quantity of IgG                             | 2.48E-04 | CCR5,CDKN1A,CEBPB (includes EG:1051),CIITA,FPR2 (includes EG:100426968),SAMS1,SELP                  | 7  |



|                                               |                                     |          |                                                                                      |   |
|-----------------------------------------------|-------------------------------------|----------|--------------------------------------------------------------------------------------|---|
| Humoral Immune Response                       | quantity of IgG                     | 2.48E-04 | CCR5,CDKN1A,CEBPB (includes EG:1051),CIITA,FPR2 (includes EG:100426968),SAMS1N1,SELP | 7 |
| Hematological System Development and Function | binding of mononuclear leukocytes   | 2.52E-04 | CCR5,CD44,CD47,MSN,RAP1GAP                                                           | 5 |
| Cell-To-Cell Signaling and Interaction        | binding of mononuclear leukocytes   | 2.52E-04 | CCR5,CD44,CD47,MSN,RAP1GAP                                                           | 5 |
| Cellular Movement                             | migration of epithelial cell lines  | 2.52E-04 | CCR5,FPR2 (includes EG:100426968),OSM,SAA1                                           | 4 |
| Hair and Skin Development and Function        | migration of epithelial cell lines  | 2.52E-04 | CCR5,FPR2 (includes EG:100426968),OSM,SAA1                                           | 4 |
| Cell Death and Survival                       | apoptosis of muscle cells           | 2.54E-04 | CASP1,CDKN1A,DUSP6,FSTL1,HIF1A,INHBA,SOCS3                                           | 7 |
| Cellular Movement                             | emigration of Langerhans cells      | 2.58E-04 | CD44,SPP1 (includes EG:100359743)                                                    | 2 |
| Hematological System Development and Function | emigration of Langerhans cells      | 2.58E-04 | CD44,SPP1 (includes EG:100359743)                                                    | 2 |
| Immune Cell Trafficking                       | emigration of Langerhans cells      | 2.58E-04 | CD44,SPP1 (includes EG:100359743)                                                    | 2 |
| Inflammatory Response                         | emigration of Langerhans cells      | 2.58E-04 | CD44,SPP1 (includes EG:100359743)                                                    | 2 |
| Cellular Movement                             | homing of stem cells                | 2.58E-04 | CXCR4,SELP                                                                           | 2 |
| Cellular Growth and Proliferation             | proliferation of interstitial cells | 2.58E-04 | PLAT,SPP1 (includes EG:100359743)                                                    | 2 |
| Tissue Morphology                             | quantity of podocytes               | 2.58E-04 | CDKN1A,SPP1 (includes EG:100359743)                                                  | 2 |
| Cellular Movement                             | release of hematopoietic cells      | 2.58E-04 | CXCR4,INHBA                                                                          | 2 |
| Cellular Function and Maintenance             | engulfment of cells                 | 2.69E-04 | CD44,CD47,CEBPB (includes EG:1051),CORO1A,DAB2,PADI4,SIRPA,SLC11A1                   | 8 |
| Cellular Function and Maintenance             | homeostasis of iron ion             | 2.76E-04 | CP,HIF1A,SLC11A1                                                                     | 3 |
| Small Molecule Biochemistry                   | homeostasis of iron ion             | 2.76E-04 | CP,HIF1A,SLC11A1                                                                     | 3 |
| Inflammatory Disease                          | Dermatitis                          | 2.83E-04 | CASP1,CD44,CXCR4,MSN,OSM,OSMR,S100A8,SELP,S                                          | 9 |
| Dermatological Diseases and Conditions        | Dermatitis                          | 2.83E-04 | OCS3                                                                                 | 9 |
| Metabolic Disease                             | amyloidosis                         | 2.87E-04 | CD47,OSMR,SAA1,TGFBI                                                                 | 4 |
| Hematological System Development and Function | quantity of macrophages             | 2.87E-04 | CCL7,PLAT,SELP,SOAT1,SOCS3,SPP1 (includes EG:100359743)                              | 6 |
| Inflammatory Response                         | quantity of macrophages             | 2.87E-04 | CCL7,PLAT,SELP,SOAT1,SOCS3,SPP1 (includes EG:100359743)                              | 6 |
| Tissue Morphology                             | quantity of macrophages             | 2.87E-04 | CCL7,PLAT,SELP,SOAT1,SOCS3,SPP1 (includes EG:100359743)                              | 6 |
| Cell-To-Cell Signaling and Interaction        | response of myeloid cells           | 2.87E-04 | CD44,CD47,CEBPB (includes EG:1051),CORO1A,CXCL1,PADI4                                | 6 |
| Cancer                                        | prostatic intraepithelial neoplasia | 2.98E-04 | CFB,GPRC5A,IER3,S100A8,SOCS3                                                         | 5 |
| Reproductive System Disease                   | prostatic intraepithelial neoplasia | 2.98E-04 | CFB,GPRC5A,IER3,S100A8,SOCS3                                                         | 5 |
| Inflammatory Response                         | ulcerative colitis                  | 3.05E-04 | CASP1,S100A8,SOCS3,SPP1 (includes EG:100359743)                                      | 4 |

|                                               |                                      |          |                                                                                                                                                                                                                  |    |
|-----------------------------------------------|--------------------------------------|----------|------------------------------------------------------------------------------------------------------------------------------------------------------------------------------------------------------------------|----|
| Inflammatory Disease                          | ulcerative colitis                   | 3.05E-04 | CASP1,S100A8,SOCS3,SPP1 (includes EG:100359743)                                                                                                                                                                  | 4  |
| Gastrointestinal Disease                      | ulcerative colitis                   | 3.05E-04 | CASP1,S100A8,SOCS3,SPP1 (includes EG:100359743)<br>BACE2,CASP1,CCR5,CD44,CD47,CDKN1A,CEBPB (includes EG:1051),CFB,CXCR4,HIF1A,MSN,OSM,PLAT,PTPN1,SELPI,SLPI,SOCS3,SPP1 (includes EG:100359743),SULF2,TGFBI,THBS2 | 4  |
| Organismal Survival                           | organismal death                     | 3.07E-04 | EG:100359743),SULF2,TGFBI,THBS2                                                                                                                                                                                  | 21 |
| Cancer                                        | interphase of cancer cells           | 3.11E-04 | CDKN1A,INHBA,OSM                                                                                                                                                                                                 | 3  |
| Cell Cycle                                    | interphase of cancer cells           | 3.11E-04 | CDKN1A,INHBA,OSM                                                                                                                                                                                                 | 3  |
| Hematological System Development and Function | function of macrophages              | 3.14E-04 | CASP1,CEBPB (includes EG:1051),PLAT,SIRPA,SLPI,SPP1 (includes EG:100359743)                                                                                                                                      | 6  |
| Cellular Function and Maintenance             | function of macrophages              | 3.14E-04 | CASP1,CEBPB (includes EG:1051),PLAT,SIRPA,SLPI,SPP1 (includes EG:100359743)                                                                                                                                      | 6  |
| Cellular Movement                             | invasion of breast cancer cell lines | 3.33E-04 | CD44,CXCR4,FXYD5,HIF1A,SEMA3F,SPP1 (includes EG:100359743)                                                                                                                                                       | 6  |
| Cancer                                        | papillary carcinoma                  | 3.36E-04 | CD44,CDKN1A,CXCR4,RAP1GAP,SPP1 (includes EG:100359743)                                                                                                                                                           | 5  |
| Cellular Development                          | maturation of cells                  | 3.43E-04 | CD44,CD47,CDKN1A,CXCR4,HIF1A,INHBA,INSL3,PTP N1,SIRPA                                                                                                                                                            | 9  |
| Inflammatory Response                         | cell-mediated response               | 3.43E-04 | CASP1,CCR5,CEBPB (includes EG:1051),FSTL1,SLC11A1,SRGN                                                                                                                                                           | 6  |
| Hematological System Development and Function | adhesion of neutrophils              | 3.44E-04 | CD44,CORO1A,S100A8,SELP                                                                                                                                                                                          | 4  |
| Immune Cell Trafficking                       | adhesion of neutrophils              | 3.44E-04 | CD44,CORO1A,S100A8,SELP                                                                                                                                                                                          | 4  |
| Inflammatory Response                         | adhesion of neutrophils              | 3.44E-04 | CD44,CORO1A,S100A8,SELP                                                                                                                                                                                          | 4  |
| Cell-To-Cell Signaling and Interaction        | adhesion of neutrophils              | 3.44E-04 | CD44,CORO1A,S100A8,SELP                                                                                                                                                                                          | 4  |
| Tissue Development                            | adhesion of neutrophils              | 3.44E-04 | CD44,CORO1A,S100A8,SELP                                                                                                                                                                                          | 4  |
| Cellular Development                          | differentiation of leukemia cells    | 3.49E-04 | CD44,CEBPB (includes EG:1051),INHBA                                                                                                                                                                              | 3  |
| Cancer                                        | differentiation of leukemia cells    | 3.49E-04 | CD44,CEBPB (includes EG:1051),INHBA                                                                                                                                                                              | 3  |
| Tumor Morphology                              | differentiation of leukemia cells    | 3.49E-04 | CD44,CEBPB (includes EG:1051),INHBA                                                                                                                                                                              | 3  |
| Cellular Movement                             | localization of blood cells          | 3.49E-04 | CD44,CXCR4,SELP                                                                                                                                                                                                  | 3  |
| Cellular Function and Maintenance             | localization of blood cells          | 3.49E-04 | CD44,CXCR4,SELP                                                                                                                                                                                                  | 3  |
| Cell Morphology                               | polarization of tumor cell lines     | 3.49E-04 | CD47,RAP1GAP,SAMSN1                                                                                                                                                                                              | 3  |
| Cellular Movement                             | infiltration by macrophages          | 3.49E-04 | CASP1,CCR5,CD44,HIF1A,SPP1 (includes EG:100359743)                                                                                                                                                               | 5  |
| Hematological System Development and Function | infiltration by macrophages          | 3.49E-04 | CASP1,CCR5,CD44,HIF1A,SPP1 (includes EG:100359743)                                                                                                                                                               | 5  |
| Immune Cell Trafficking                       | infiltration by macrophages          | 3.49E-04 | CASP1,CCR5,CD44,HIF1A,SPP1 (includes EG:100359743)                                                                                                                                                               | 5  |
| Inflammatory Response                         | infiltration by macrophages          | 3.49E-04 | CASP1,CCR5,CD44,HIF1A,SPP1 (includes EG:100359743)                                                                                                                                                               | 5  |

|                                                      |                                                |          |                                                    |   |
|------------------------------------------------------|------------------------------------------------|----------|----------------------------------------------------|---|
| Organismal Injury and Abnormalities                  | injury of kidney                               | 3.64E-04 | CD44,CFB,FUT4,PLAT                                 | 4 |
| Renal and Urological Disease                         | injury of kidney                               | 3.64E-04 | CD44,CFB,FUT4,PLAT                                 | 4 |
| Cellular Movement                                    | cell movement of kidney cell lines             | 3.78E-04 | CCR5,CXCL1,CXCR4,FPR2 (includes EG:100426968),SAA1 | 5 |
| Renal and Urological System Development and Function | cell movement of kidney cell lines             | 3.78E-04 | CCR5,CXCL1,CXCR4,FPR2 (includes EG:100426968),SAA1 | 5 |
| Cellular Movement                                    | adhesion of Th1 cells                          | 3.85E-04 | FUT4,SELP                                          | 2 |
| Hematological System Development and Function        | adhesion of Th1 cells                          | 3.85E-04 | FUT4,SELP                                          | 2 |
| Immune Cell Trafficking                              | adhesion of Th1 cells                          | 3.85E-04 | FUT4,SELP                                          | 2 |
| Cell-To-Cell Signaling and Interaction               | adhesion of Th1 cells                          | 3.85E-04 | FUT4,SELP                                          | 2 |
| Tissue Development                                   | adhesion of Th1 cells                          | 3.85E-04 | FUT4,SELP                                          | 2 |
| Cell-mediated Immune Response                        | adhesion of Th1 cells                          | 3.85E-04 | FUT4,SELP                                          | 2 |
| Cell-To-Cell Signaling and Interaction               | adhesion of melanoma cells                     | 3.85E-04 | CD47,TGFBI                                         | 2 |
| Tissue Development                                   | adhesion of melanoma cells                     | 3.85E-04 | CD47,TGFBI                                         | 2 |
| Tumor Morphology                                     | adhesion of melanoma cells                     | 3.85E-04 | CD47,TGFBI                                         | 2 |
| Cellular Compromise                                  | adhesion of melanoma cells                     | 3.85E-04 | CD47,TGFBI                                         | 2 |
| Hematological System Development and Function        | aggregation of B-lymphocyte derived cell lines | 3.85E-04 | CD47,SIRPA                                         | 2 |
| Immune Cell Trafficking                              | aggregation of B-lymphocyte derived cell lines | 3.85E-04 | CD47,SIRPA                                         | 2 |
| Cell-To-Cell Signaling and Interaction               | aggregation of B-lymphocyte derived cell lines | 3.85E-04 | CD47,SIRPA                                         | 2 |
| Tissue Development                                   | aggregation of B-lymphocyte derived cell lines | 3.85E-04 | CD47,SIRPA                                         | 2 |
| Hematological System Development and Function        | arrest in growth of lymphocytes                | 3.85E-04 | CDKN1A,HIF1A                                       | 2 |
| Cellular Development                                 | arrest in growth of lymphocytes                | 3.85E-04 | CDKN1A,HIF1A                                       | 2 |
| Cellular Growth and Proliferation                    | arrest in growth of lymphocytes                | 3.85E-04 | CDKN1A,HIF1A                                       | 2 |
| Cellular Movement                                    | extravasation of tumor cell lines              | 3.85E-04 | CXCR4,RAP1GAP                                      | 2 |
| Cellular Function and Maintenance                    | presence of neurons                            | 3.85E-04 | CXCR4,PLAT                                         | 2 |
| Carbohydrate Metabolism                              | quantity of hyaluronic acid                    | 3.85E-04 | CD44,OSM                                           | 2 |
| Molecular Transport                                  | quantity of hyaluronic acid                    | 3.85E-04 | CD44,OSM                                           | 2 |

|                          |                                                      |          |                                                                                 |    |
|--------------------------|------------------------------------------------------|----------|---------------------------------------------------------------------------------|----|
| Small Molecule           |                                                      |          |                                                                                 |    |
| Biochemistry             | quantity of hyaluronic acid                          | 3.85E-04 | CD44,OSM                                                                        | 2  |
| Drug Metabolism          | quantity of hyaluronic acid                          | 3.85E-04 | CD44,OSM                                                                        | 2  |
| Cellular Movement        | dissemination of cells                               | 3.89E-04 | CD47,SIRPA,SLPI                                                                 | 3  |
| Connective Tissue        |                                                      |          |                                                                                 |    |
| Development and Function | focus formation of fibroblast cell lines             | 3.89E-04 | CD44,CEBPB (includes EG:1051),SPP1 (includes EG:100359743)                      | 3  |
| Infectious Disease       | infection of antigen presenting cells                | 3.89E-04 | CASP1,CCR5,CXCR4                                                                | 3  |
| Immunological Disease    | infection of antigen presenting cells                | 3.89E-04 | CASP1,CCR5,CXCR4                                                                | 3  |
| Hematological Disease    | infection of antigen presenting cells                | 3.89E-04 | CASP1,CCR5,CXCR4                                                                | 3  |
| Hematological Disease    | hemorrhagic disease                                  | 3.92E-04 | CD47,CFB,CXCL1,SIRPA,THBS2                                                      | 5  |
| Hematological System     |                                                      |          |                                                                                 |    |
| Development and Function | quantity of helper T lymphocytes                     | 3.96E-04 | CHI3L1,CIITA,CORO1A,HIF1A,SELP,SOCS3                                            | 6  |
| Tissue Morphology        | quantity of helper T lymphocytes                     | 3.96E-04 | CHI3L1,CIITA,CORO1A,HIF1A,SELP,SOCS3                                            | 6  |
| Cell Death and Survival  | cell death of tumor cells                            | 4.16E-04 | CASP1,CD47,CDKN1A,CXCR4,HIF1A,INHBA,SOCS3,THBS2                                 | 8  |
| Tumor Morphology         | cell death of tumor cells                            | 4.16E-04 | CASP1,CD47,CDKN1A,CXCR4,HIF1A,INHBA,SOCS3,THBS2                                 | 8  |
| Tissue Morphology        | quantity of neurons                                  | 4.19E-04 | CDKN1A,CP,CXCR4,GDA,HIF1A,INHBA,SPP1 (includes EG:100359743)                    | 7  |
| Nervous System           |                                                      |          |                                                                                 |    |
| Development and Function | quantity of neurons                                  | 4.19E-04 | CDKN1A,CP,CXCR4,GDA,HIF1A,INHBA,SPP1 (includes EG:100359743)                    | 7  |
| Cancer                   | neuroendocrine tumor                                 | 4.19E-04 | APOBEC1,CASP1,CDKN1A,CHRN1,CXCR4,HIF1A,PLAT,S100A8,SPP1 (includes EG:100359743) | 9  |
| Hematological System     |                                                      |          |                                                                                 |    |
| Development and Function | accumulation of phagocytes                           | 4.39E-04 | CD44,S100A8,SELP,SLPI,SPP1 (includes EG:100359743)                              | 5  |
| Immune Cell              |                                                      |          |                                                                                 |    |
| Trafficking              | accumulation of phagocytes                           | 4.39E-04 | CD44,S100A8,SELP,SLPI,SPP1 (includes EG:100359743)                              | 5  |
| Inflammatory             |                                                      |          |                                                                                 |    |
| Response                 | accumulation of phagocytes                           | 4.39E-04 | CD44,S100A8,SELP,SLPI,SPP1 (includes EG:100359743)                              | 5  |
| Tissue Development       | accumulation of phagocytes                           | 4.39E-04 | CD44,S100A8,SELP,SLPI,SPP1 (includes EG:100359743)                              | 5  |
| Digestive System         |                                                      |          |                                                                                 |    |
| Development and Function | morphology of digestive system                       | 4.47E-04 | CCR5,CDKN1A,CP,INHBA,OSM,OSMR,PTPN1,RGS1,SOCS3,SPP1 (includes EG:100359743)     | 11 |
| Cell Cycle               | arrest in cell cycle progression of tumor cell lines | 4.56E-04 | CDKN1A,CEBPB (includes EG:1051),HIF1A,INHBA,PADI4                               | 5  |
| Cancer                   | papilloma                                            | 4.56E-04 | CDKN1A,S100A8,SLPI,SPP1 (includes EG:100359743),THBS2                           | 5  |
| Dermatological           |                                                      |          |                                                                                 |    |
| Diseases and Conditions  | papilloma                                            | 4.56E-04 | CDKN1A,S100A8,SLPI,SPP1 (includes EG:100359743),THBS2                           | 5  |
| Protein Synthesis        | quantity of interleukin                              | 4.56E-04 | CASP1,CD44,CEBPB (includes EG:1051),SELP,SPP1 (includes EG:100359743)           | 5  |
| Cell Death and Survival  | apoptosis of keratinocytes                           | 4.57E-04 | CASP1,CDKN1A,CEBPB (includes EG:1051),PLAT                                      | 4  |
| Cellular Movement        | cell movement of lymphatic system cells              | 4.57E-04 | CCR5,CD44,CXCR4,HIF1A                                                           | 4  |

|                                               |                                         |          |                                                                     |   |
|-----------------------------------------------|-----------------------------------------|----------|---------------------------------------------------------------------|---|
| Immune Cell Trafficking                       | cell movement of lymphatic system cells | 4.57E-04 | CCR5,CD44,CXCR4,HIF1A                                               | 4 |
| Cellular Movement                             | cell rolling of leukocytes              | 4.57E-04 | CD44,CXCL1,FUT4,SELP                                                | 4 |
| Hematological System Development and Function |                                         |          |                                                                     |   |
| Immune Cell Trafficking                       | cell rolling of leukocytes              | 4.57E-04 | CD44,CXCL1,FUT4,SELP                                                | 4 |
| Inflammatory Disease Gastrointestinal Disease | Inflammatory Bowel Disease              | 4.57E-04 | CASP1,CCR5,CD44,RGS1,S100A8,SLPI,SOCS3,SPP1 (includes EG:100359743) | 8 |
|                                               | Inflammatory Bowel Disease              | 4.57E-04 | (includes EG:100359743)                                             | 8 |
| Hematological System Development and Function |                                         |          |                                                                     |   |
| Immune Cell Trafficking                       | adhesion of phagocytes                  | 4.72E-04 | CD44,CORO1A,S100A8,SELP,SIRPA                                       | 5 |
| Inflammatory Response                         | adhesion of phagocytes                  | 4.72E-04 | CD44,CORO1A,S100A8,SELP,SIRPA                                       | 5 |
| Cell-To-Cell Signaling and Interaction        | adhesion of phagocytes                  | 4.72E-04 | CD44,CORO1A,S100A8,SELP,SIRPA                                       | 5 |
| Tissue Development                            | adhesion of phagocytes                  | 4.72E-04 | CD44,CORO1A,S100A8,SELP,SIRPA                                       | 5 |
| Cellular Development                          | arrest in development of cells          | 4.79E-04 | CDKN1A,CXCR4,HIF1A                                                  | 3 |
| Cell Death and Survival                       | activation-induced cell death           | 4.82E-04 | CCR5,CDKN1A,CIITA,TNFRSF18                                          | 4 |
| Tissue Development Organismal Development     | lactation                               | 4.82E-04 | CD44,CEBPB (includes EG:1051),HIF1A,SPP1 (includes EG:100359743)    | 4 |
|                                               | lactation                               | 4.82E-04 | (includes EG:100359743)                                             | 4 |
| Reproductive System Development and Function  |                                         |          |                                                                     |   |
| Cellular Assembly and Organization            | lactation                               | 4.82E-04 | CD44,CEBPB (includes EG:1051),HIF1A,SPP1 (includes EG:100359743)    | 4 |
|                                               | organization of plasma membrane         | 4.82E-04 | CD44,CHRN1,CORO1A,PLEK                                              | 4 |
| Cell Death and Survival                       | cell death of cancer cells              | 4.89E-04 | CASP1,CD47,CDKN1A,CXCR4,HIF1A,INHBA,SOCS3                           | 7 |
| Tumor Morphology                              | cell death of cancer cells              | 4.89E-04 | CASP1,CD47,CDKN1A,CXCR4,HIF1A,INHBA,SOCS3                           | 7 |
| Cellular Movement                             | migration of macrophages                | 5.08E-04 | CCR5,CXCL1,CXCR4,SPP1 (includes EG:100359743)                       | 4 |
| Hematological System Development and Function |                                         |          |                                                                     |   |
| Immune Cell Trafficking                       | migration of macrophages                | 5.08E-04 | CCR5,CXCL1,CXCR4,SPP1 (includes EG:100359743)                       | 4 |
| Inflammatory Response                         | migration of macrophages                | 5.08E-04 | CCR5,CXCL1,CXCR4,SPP1 (includes EG:100359743)                       | 4 |
| Hematological System Development and Function |                                         |          |                                                                     |   |
|                                               | proliferation of leukocyte cell lines   | 5.09E-04 | CD44,INHBA,OSM,OSMR,SOCS3,SPP1 (includes EG:100359743)              | 6 |

|                                               |                                        |          |                                                                                                                                          |    |
|-----------------------------------------------|----------------------------------------|----------|------------------------------------------------------------------------------------------------------------------------------------------|----|
| Cellular Development                          | proliferation of leukocyte cell lines  | 5.09E-04 | CD44,INHBA,OSM,OSMR,SOCS3,SPP1 (includes EG:100359743)                                                                                   | 6  |
| Cellular Growth and Proliferation             | proliferation of leukocyte cell lines  | 5.09E-04 | CD44,INHBA,OSM,OSMR,SOCS3,SPP1 (includes EG:100359743)                                                                                   | 6  |
| Cancer                                        | mammary tumor                          | 5.09E-04 | ADAMTS4,CCR5,CD44,CDKN1A,CEBPB (includes EG:1051),CHI3L1,CXCL1,HIF1A,IER3,PTPN1,RGS1,S100A8,SLPI,SPP1 (includes EG:100359743),TGFB1,TMC5 | 16 |
| Organismal Injury and Abnormalities           | cytosis                                | 5.11E-04 | ADAMTS4,CASP1,CXCR4,HIF1A,SELP,SOCS3,SPP1 (includes EG:100359743)                                                                        | 7  |
| Tissue Morphology                             | degradation of connective tissue       | 5.36E-04 | CFB,OSM,SLPI,SULF2                                                                                                                       | 4  |
| Hematological System Development and Function | accumulation of blood platelets        | 5.38E-04 | PLAT,SELP                                                                                                                                | 2  |
| Inflammatory Response                         | accumulation of blood platelets        | 5.38E-04 | PLAT,SELP                                                                                                                                | 2  |
| Tissue Development                            | accumulation of blood platelets        | 5.38E-04 | PLAT,SELP                                                                                                                                | 2  |
| Tissue Development                            | aggregation of colon cancer cell lines | 5.38E-04 | CD44,CDKN1A                                                                                                                              | 2  |
| Cancer                                        | arrest in G1 phase of cancer cells     | 5.38E-04 | CDKN1A,INHBA                                                                                                                             | 2  |
| Cell Cycle                                    | arrest in G1 phase of cancer cells     | 5.38E-04 | CDKN1A,INHBA                                                                                                                             | 2  |
| Cellular Movement                             | cell rolling of Th1 cells              | 5.38E-04 | FUT4,SELP                                                                                                                                | 2  |
| Hematological System Development and Function | cell rolling of Th1 cells              | 5.38E-04 | FUT4,SELP                                                                                                                                | 2  |
| Immune Cell Trafficking                       | cell rolling of Th1 cells              | 5.38E-04 | FUT4,SELP                                                                                                                                | 2  |
| Cell-mediated Immune Response                 | cell rolling of Th1 cells              | 5.38E-04 | FUT4,SELP                                                                                                                                | 2  |
| Cellular Movement                             | mobilization of progenitor cells       | 5.38E-04 | CXCR4,SOCS3                                                                                                                              | 2  |
| Immunological Disease                         | immediate hypersensitivity             | 5.69E-04 | CD44,CORO1A,CXCR4,MSN,OSM,OSMR,S100A8,SELP                                                                                               | 8  |
| Endocrine System Development and Function     | insulin sensitivity index              | 5.81E-04 | CDKN1A,PTPN1,SOCS3                                                                                                                       | 3  |
| Nutritional Disease                           | morbid obesity                         | 5.81E-04 | CCR5,CD44,SPP1 (includes EG:100359743)                                                                                                   | 3  |
| Carbohydrate Metabolism                       | metabolism of carbohydrate             | 5.92E-04 | CD44,CEBPB (includes EG:1051),DUSP6,FUT4,GPR35,PLEK,PTPN1,SOCS3,SP P1 (includes EG:100359743),SRGN,SULF2                                 | 11 |
| Tissue Morphology                             | damage of bone                         | 5.94E-04 | CFB,OSM,SPP1 (includes EG:100359743),TNFRSF18                                                                                            | 4  |
| Skeletal and Muscular Disorders               | damage of bone                         | 5.94E-04 | CFB,OSM,SPP1 (includes EG:100359743),TNFRSF18                                                                                            | 4  |
| Organismal Injury and Abnormalities           | damage of bone                         | 5.94E-04 | CFB,OSM,SPP1 (includes EG:100359743),TNFRSF18                                                                                            | 4  |
| Cellular Movement                             | recruitment of lymphocytes             | 5.94E-04 | CCL7,CD44,CXCR4,SELP                                                                                                                     | 4  |
| Hematological System Development and Function | recruitment of lymphocytes             | 5.94E-04 | CCL7,CD44,CXCR4,SELP                                                                                                                     | 4  |
| Immune Cell Trafficking                       | recruitment of lymphocytes             | 5.94E-04 | CCL7,CD44,CXCR4,SELP                                                                                                                     | 4  |

|                                                |                                       |          |                                                                                                                        |    |
|------------------------------------------------|---------------------------------------|----------|------------------------------------------------------------------------------------------------------------------------|----|
| Cell-To-Cell Signaling and Interaction         | recruitment of lymphocytes            | 5.94E-04 | CCL7,CD44,CXCR4,SELP                                                                                                   | 4  |
| Tissue Morphology                              | size of atherosclerotic lesion        | 5.94E-04 | SELP,SOAT1,SOCS3,SPP1 (includes EG:100359743)                                                                          | 4  |
| Cardiovascular Disease                         | size of atherosclerotic lesion        | 5.94E-04 | SELP,SOAT1,SOCS3,SPP1 (includes EG:100359743)                                                                          | 4  |
| Cancer                                         | gastrointestinal tract cancer         | 6.01E-04 | BST2,CASP1,CD44,CDKN1A,CHRN1A,CXCL1,CXCR4,DUSP6,FUT4,GPRC5A,HIF1A,INHBA,OSMR,PLAT,RAP1GAP,SPP1 (includes EG:100359743) | 16 |
| Gastrointestinal Disease                       | gastrointestinal tract cancer         | 6.01E-04 | BST2,CASP1,CD44,CDKN1A,CHRN1A,CXCL1,CXCR4,DUSP6,FUT4,GPRC5A,HIF1A,INHBA,OSMR,PLAT,RAP1GAP,SPP1 (includes EG:100359743) | 16 |
| Cellular Movement                              | homing of tumor cell lines            | 6.05E-04 | CCL7,CCR5,CXCR4,FPR2 (includes EG:100426968),PTPN1                                                                     | 5  |
| Cellular Movement                              | mobilization of cells                 | 6.24E-04 | CCL7,CCR5,CXCR4,SOCS3                                                                                                  | 4  |
| Cardiovascular System Development and Function | neovascularization                    | 6.26E-04 | CD44,CD47,INHBA,SPP1 (includes EG:100359743),THBS2                                                                     | 5  |
| Cell Death and Survival                        | apoptosis of splenocytes              | 6.36E-04 | CASP1,CDKN1A,SPP1 (includes EG:100359743)                                                                              | 3  |
| Infectious Disease                             | infection of phagocytes               | 6.36E-04 | CASP1,CCR5,CXCR4                                                                                                       | 3  |
| Immunological Disease                          | infection of phagocytes               | 6.36E-04 | CASP1,CCR5,CXCR4                                                                                                       | 3  |
| Hematological Disease                          | infection of phagocytes               | 6.36E-04 | CASP1,CCR5,CXCR4                                                                                                       | 3  |
| Cancer                                         | metastasis of malignant tumor         | 6.36E-04 | CD44,CXCL1,SPP1 (includes EG:100359743)                                                                                | 3  |
| Small Molecule Biochemistry                    | regulation of lipid                   | 6.36E-04 | APOBEC1,PLAT,SOCS3                                                                                                     | 3  |
| Lipid Metabolism                               | regulation of lipid                   | 6.36E-04 | APOBEC1,PLAT,SOCS3                                                                                                     | 3  |
| Hematological System Development and Function  | activation of microglia               | 6.56E-04 | CASP1,CD47,CEBPB (includes EG:1051),PLAT                                                                               | 4  |
| Cell-To-Cell Signaling and Interaction         | activation of microglia               | 6.56E-04 | CASP1,CD47,CEBPB (includes EG:1051),PLAT                                                                               | 4  |
| Nervous System Development and Function        | activation of microglia               | 6.56E-04 | CASP1,CD47,CEBPB (includes EG:1051),PLAT                                                                               | 4  |
| Cell Cycle                                     | cell cycle progression of blood cells | 6.56E-04 | CD44,CDKN1A,HIF1A,OSM                                                                                                  | 4  |
| Inflammatory Response                          | inflammation of skin                  | 6.56E-04 | CD47,SLPI,SOAT1,THBS2                                                                                                  | 4  |
| Cardiovascular Disease                         | ischemia of brain                     | 6.56E-04 | CASP1,HIF1A,PLAT,SLC16A6                                                                                               | 4  |
| Neurological Disease                           | ischemia of brain                     | 6.56E-04 | CASP1,HIF1A,PLAT,SLC16A6                                                                                               | 4  |
| Tissue Development                             | mineralization of connective tissue   | 6.69E-04 | CEBPB (includes EG:1051),CIITA,HIF1A,SPP1 (includes EG:100359743),SRGN                                                 | 5  |
| Organismal Development                         | mineralization of connective tissue   | 6.69E-04 | CEBPB (includes EG:1051),CIITA,HIF1A,SPP1 (includes EG:100359743),SRGN                                                 | 5  |
| Connective Tissue Development and Function     | mineralization of connective tissue   | 6.69E-04 | CEBPB (includes EG:1051),CIITA,HIF1A,SPP1 (includes EG:100359743),SRGN                                                 | 5  |

|                                                       |                                            |          |                                                                        |    |
|-------------------------------------------------------|--------------------------------------------|----------|------------------------------------------------------------------------|----|
| Skeletal and Muscular System Development and Function | mineralization of connective tissue        | 6.69E-04 | CEBPB (includes EG:1051),CIITA,HIF1A,SPP1 (includes EG:100359743),SRGN | 5  |
| Embryonic Development                                 | mineralization of connective tissue        | 6.69E-04 | CEBPB (includes EG:1051),CIITA,HIF1A,SPP1 (includes EG:100359743),SRGN | 5  |
| Organ Development                                     | mineralization of connective tissue        | 6.69E-04 | CEBPB (includes EG:1051),CIITA,HIF1A,SPP1 (includes EG:100359743),SRGN | 5  |
| Cellular Movement                                     | cell movement of PBMCs                     | 6.95E-04 | CCL7,CCR5,FPR2 (includes EG:100426968)                                 | 3  |
| Hematological System Development and Function         | cell movement of PBMCs                     | 6.95E-04 | CCL7,CCR5,FPR2 (includes EG:100426968)                                 | 3  |
| Immune Cell Trafficking                               | cell movement of PBMCs                     | 6.95E-04 | CCL7,CCR5,FPR2 (includes EG:100426968)                                 | 3  |
| Cancer                                                | lymphohematopoietic cancer                 | 7.10E-04 | SMR,PTPN1,TGFBI                                                        | 14 |
| Inflammatory Response                                 | colitis                                    | 7.13E-04 | CASP1,CCR5,CD44,S100A8,SOCS3,SPP1 (includes EG:100359743)              | 6  |
| Inflammatory Disease                                  | colitis                                    | 7.13E-04 | CASP1,CCR5,CD44,S100A8,SOCS3,SPP1 (includes EG:100359743)              | 6  |
| Gastrointestinal Disease                              | colitis                                    | 7.13E-04 | CASP1,CCR5,CD44,S100A8,SOCS3,SPP1 (includes EG:100359743)              | 6  |
| Hematological System Development and Function         | arrest in development of pro-T lymphocytes | 7.15E-04 | CDKN1A,CXCR4                                                           | 2  |
| Tissue Development                                    | arrest in development of pro-T lymphocytes | 7.15E-04 | CDKN1A,CXCR4                                                           | 2  |
| Cellular Function and Maintenance                     | arrest in development of pro-T lymphocytes | 7.15E-04 | CDKN1A,CXCR4                                                           | 2  |
| Cellular Development                                  | arrest in development of pro-T lymphocytes | 7.15E-04 | CDKN1A,CXCR4                                                           | 2  |
| Organismal Development                                | arrest in development of pro-T lymphocytes | 7.15E-04 | CDKN1A,CXCR4                                                           | 2  |
| Cell-mediated Immune Response                         | arrest in development of pro-T lymphocytes | 7.15E-04 | CDKN1A,CXCR4                                                           | 2  |
| Lymphoid Tissue Structure and Development             | arrest in development of pro-T lymphocytes | 7.15E-04 | CDKN1A,CXCR4                                                           | 2  |
| Embryonic Development                                 | arrest in development of pro-T lymphocytes | 7.15E-04 | CDKN1A,CXCR4                                                           | 2  |
| Hematopoiesis                                         | arrest in development of pro-T lymphocytes | 7.15E-04 | CDKN1A,CXCR4                                                           | 2  |
| Organ Development                                     | lymphocytes                                | 7.15E-04 | CDKN1A,CXCR4                                                           | 2  |
| Molecular Transport                                   | export of heavy metal                      | 7.15E-04 | CP,SLC11A1                                                             | 2  |
| Cancer                                                | growth of blood tumor                      | 7.15E-04 | BST2,INHBA                                                             | 2  |
| Hematological System Development and Function         | phagocytosis of blood platelets            | 7.15E-04 | CD47,SIRPA                                                             | 2  |
| Inflammatory Response                                 | phagocytosis of blood platelets            | 7.15E-04 | CD47,SIRPA                                                             | 2  |
| Cell-To-Cell Signaling and Interaction                | phagocytosis of blood platelets            | 7.15E-04 | CD47,SIRPA                                                             | 2  |



|                                            |                                           |          |                                                                                    |    |
|--------------------------------------------|-------------------------------------------|----------|------------------------------------------------------------------------------------|----|
| Cellular Function and Maintenance          | phagocytosis of blood platelets           | 7.15E-04 | CD47,SIRPA                                                                         | 2  |
| Organismal Injury and Abnormalities        | damage of brain                           | 7.23E-04 | CASP1,CD47,HIF1A,PLAT                                                              | 4  |
| Neurological Disease                       | damage of brain                           | 7.23E-04 | CASP1,CD47,HIF1A,PLAT                                                              | 4  |
| Cancer                                     | incidence of tumor                        | 7.30E-04 | CD44,CD47,CDKN1A,CEBPB (includes EG:1051),SPP1 (includes EG:100359743),TGFB1,THBS2 | 7  |
| Cell Death and Survival                    | apoptosis of ovarian cancer cell lines    | 7.58E-04 | CASP1,CDKN1A,SEMA3F,SLPI                                                           | 4  |
| Small Molecule Biochemistry                | incorporation of thymidine                | 7.58E-04 | CDKN1A,INHBA,SIRPA,THBS2                                                           | 4  |
| DNA Replication, Recombination, and Repair | incorporation of thymidine                | 7.58E-04 | CDKN1A,INHBA,SIRPA,THBS2                                                           | 4  |
| Nucleic Acid Metabolism                    | incorporation of thymidine                | 7.58E-04 | CDKN1A,INHBA,SIRPA,THBS2                                                           | 4  |
| Tissue Morphology                          | morphology of hepatocytes                 | 7.58E-04 | CDKN1A,CP,OSM,OSMR                                                                 | 4  |
| Cell Morphology                            | morphology of hepatocytes                 | 7.58E-04 | CDKN1A,CP,OSM,OSMR                                                                 | 4  |
| Hepatic System Development and Function    | morphology of hepatocytes                 | 7.58E-04 | CDKN1A,CP,OSM,OSMR                                                                 | 4  |
| Organ Morphology                           | morphology of hepatocytes                 | 7.58E-04 | CDKN1A,CP,OSM,OSMR                                                                 | 4  |
| Digestive System Development and Function  | morphology of hepatocytes                 | 7.58E-04 | CDKN1A,CP,OSM,OSMR                                                                 | 4  |
| Cellular Development                       | proliferation of thyroid tumor cell lines | 7.58E-04 | CXCR4,INHBA,RAP1GAP                                                                | 3  |
| Cellular Growth and Proliferation          | proliferation of thyroid tumor cell lines | 7.58E-04 | CXCR4,INHBA,RAP1GAP                                                                | 3  |
| Inflammatory Disease                       | atopic dermatitis                         | 7.60E-04 | CD44,CXCR4,MSN,OSM,OSMR,S100A8,SELP                                                | 7  |
| Immunological Disease                      | atopic dermatitis                         | 7.60E-04 | CD44,CXCR4,MSN,OSM,OSMR,S100A8,SELP                                                | 7  |
| Dermatological Diseases and Conditions     | atopic dermatitis                         | 7.60E-04 | CD44,CXCR4,MSN,OSM,OSMR,S100A8,SELP                                                | 7  |
| Dermatological Diseases and Conditions     | psoriasis                                 | 7.64E-04 | CD44,CDKN1A,CORO1A,DAB2,GDA,SAA1,SIRPA,TGFB                                        | 11 |
| Tissue Development                         | formation of filaments                    | 7.79E-04 | I                                                                                  | 8  |
| Cellular Assembly and Organization         | formation of filaments                    | 7.79E-04 | CD44,CDKN1A,CORO1A,DAB2,GDA,SAA1,SIRPA,TGFB                                        | 8  |
| Cancer                                     | prostate cancer                           | 7.84E-04 | CD44,CDKN1A,CFB,CHI3L1,CXCR4,GPRC5A,IER3,S100A8,SOCS3,SPP1 (includes EG:100359743) | 10 |
| Reproductive System Disease                | prostate cancer                           | 7.84E-04 | CD44,CDKN1A,CFB,CHI3L1,CXCR4,GPRC5A,IER3,S100A8,SOCS3,SPP1 (includes EG:100359743) | 10 |
| Cellular Movement                          | cell movement of neuroglia                | 7.94E-04 | CHI3L1,CXCL1,FPR2 (includes EG:100426968),SEMA3F                                   | 4  |
| Hematological Disease                      | cytopenia                                 | 7.94E-04 | CD47,CFB,CXCR4,SIRPA                                                               | 4  |
| Molecular Transport                        | release of metal                          | 8.07E-04 | CCR5,CP,OSM,RGS1,SLC11A1,SPP1 (includes EG:100359743)                              | 6  |
| Cellular Development                       | proliferation of hepatoma cell lines      | 8.13E-04 | CDKN1A,INHBA,OSM,SOCS3,SPP1 (includes EG:100359743)                                | 5  |

|                                        |                                        |          |                                                                    |    |
|----------------------------------------|----------------------------------------|----------|--------------------------------------------------------------------|----|
| Cellular Growth and Proliferation      | proliferation of hepatoma cell lines   | 8.13E-04 | CDKN1A,INHBA,OSM,SOCS3,SPP1 (includes EG:100359743)                | 5  |
| Cellular Movement                      | transmigration of monocytes            | 8.24E-04 | CCL7,CD47,SIRPA                                                    | 3  |
| Hematological System                   |                                        |          |                                                                    |    |
| Development and Function               | transmigration of monocytes            | 8.24E-04 | CCL7,CD47,SIRPA                                                    | 3  |
| Immune Cell Trafficking                | transmigration of monocytes            | 8.24E-04 | CCL7,CD47,SIRPA                                                    | 3  |
| Inflammatory Response                  | transmigration of monocytes            | 8.24E-04 | CCL7,CD47,SIRPA                                                    | 3  |
| Cellular Movement                      | transmigration of neutrophils          | 8.24E-04 | CD47,SLPI,SOCS3                                                    | 3  |
| Hematological System                   |                                        |          |                                                                    |    |
| Development and Function               | transmigration of neutrophils          | 8.24E-04 | CD47,SLPI,SOCS3                                                    | 3  |
| Immune Cell Trafficking                | transmigration of neutrophils          | 8.24E-04 | CD47,SLPI,SOCS3                                                    | 3  |
| Inflammatory Response                  | transmigration of neutrophils          | 8.24E-04 | CD47,SLPI,SOCS3                                                    | 3  |
| Cell-To-Cell Signaling and Interaction |                                        |          |                                                                    |    |
|                                        | response of mononuclear leukocytes     | 8.26E-04 | CASP1,CCR5,FSTL1,OSM,SOCS3,TNFRSF18                                | 6  |
| Cellular Movement                      | migration of monocytes                 | 8.31E-04 | CCL7,CD47,SIRPA,SPP1 (includes EG:100359743)                       | 4  |
| Hematological System                   |                                        |          |                                                                    |    |
| Development and Function               | migration of monocytes                 | 8.31E-04 | CCL7,CD47,SIRPA,SPP1 (includes EG:100359743)                       | 4  |
| Immune Cell Trafficking                | migration of monocytes                 | 8.31E-04 | CCL7,CD47,SIRPA,SPP1 (includes EG:100359743)                       | 4  |
| Inflammatory Response                  | migration of monocytes                 | 8.31E-04 | CCL7,CD47,SIRPA,SPP1 (includes EG:100359743)                       | 4  |
| Inflammatory Response                  | inflammation of lung                   | 8.33E-04 | CASP1,CCR5,CD44,CIITA,PLAT,SELP,SPP1 (includes EG:100359743),THBS2 | 8  |
| Respiratory Disease                    | inflammation of lung                   | 8.33E-04 | CASP1,CCR5,CD44,CIITA,PLAT,SELP,SPP1 (includes EG:100359743),THBS2 | 8  |
| Cancer                                 | melanoma                               | 8.56E-04 | CASP1,CD44,CXCL1,CXCR4,HIF1A,SAA1,SPP1 (includes EG:100359743)     | 7  |
| Neurological Disease                   | Alzheimer's disease                    | 8.59E-04 | APOBEC1,CASP1,CFB,CHI3L1,CXCR4,HIF1A,NAV1,PLAT,SELP,SOAT1          | 10 |
| Psychological Disorders                | Alzheimer's disease                    | 8.59E-04 | APOBEC1,CASP1,CFB,CHI3L1,CXCR4,HIF1A,NAV1,PLAT,SELP,SOAT1          | 10 |
| Cellular Movement                      | infiltration by mononuclear leukocytes | 8.66E-04 | CCR5,CD44,CIITA,OSM,SELP                                           | 5  |
| Hematological System                   |                                        |          |                                                                    |    |
| Development and Function               | infiltration by mononuclear leukocytes | 8.66E-04 | CCR5,CD44,CIITA,OSM,SELP                                           | 5  |
| Immune Cell Trafficking                | infiltration by mononuclear leukocytes | 8.66E-04 | CCR5,CD44,CIITA,OSM,SELP                                           | 5  |
| Cell-To-Cell Signaling and Interaction |                                        |          |                                                                    |    |
|                                        | signaling of cells                     | 8.73E-04 | BST2,CCL7,CD44,INHBA,INSL3,OSM,SIRPA                               | 7  |
| Nutritional Disease                    | weight loss                            | 8.88E-04 | CASP1,CD44,CDKN1A,SELP,SOCS3,SPP1 (includes EG:100359743)          | 6  |
| Tissue Development                     | accumulation of tumor cell lines       | 8.93E-04 | CDKN1A,OSM,SELP                                                    | 3  |

|                                                                                                                                                                                 |                                                                |          |                                                                                                     |    |
|---------------------------------------------------------------------------------------------------------------------------------------------------------------------------------|----------------------------------------------------------------|----------|-----------------------------------------------------------------------------------------------------|----|
| Cellular Movement<br>Immune Cell<br>Trafficking<br>Inflammatory<br>Response                                                                                                     | cell movement of bone marrow cells                             | 8.93E-04 | CD44,CXCR4,HIF1A                                                                                    | 3  |
|                                                                                                                                                                                 | cell movement of bone marrow cells                             | 8.93E-04 | CD44,CXCR4,HIF1A                                                                                    | 3  |
|                                                                                                                                                                                 | cell movement of bone marrow cells                             | 8.93E-04 | CD44,CXCR4,HIF1A                                                                                    | 3  |
| Hematopoiesis<br>Cellular Movement<br>Tissue Morphology<br>Connective Tissue<br>Development and<br>Function<br>Connective Tissue<br>Disorders                                   | cell movement of bone marrow cells                             | 8.93E-04 | CD44,CXCR4,HIF1A                                                                                    | 3  |
|                                                                                                                                                                                 | cell movement of stem cells                                    | 8.93E-04 | CXCR4,HIF1A,SELP                                                                                    | 3  |
|                                                                                                                                                                                 | mass of epididymal fat                                         | 8.93E-04 | CDKN1A,CEBPB (includes EG:1051),PTPN1                                                               | 3  |
|                                                                                                                                                                                 | mass of epididymal fat                                         | 8.93E-04 | CDKN1A,CEBPB (includes EG:1051),PTPN1                                                               | 3  |
|                                                                                                                                                                                 | systemic lupus erythematosus                                   | 8.94E-04 | CD44,CFB,SELP,SIRPA,SPP1 (includes EG:100359743)                                                    | 5  |
| Inflammatory Disease<br>Skeletal and Muscular<br>Disorders<br>Immunological<br>Disease<br>Molecular Transport                                                                   | systemic lupus erythematosus                                   | 8.94E-04 | CD44,CFB,SELP,SIRPA,SPP1 (includes EG:100359743)                                                    | 5  |
|                                                                                                                                                                                 | systemic lupus erythematosus                                   | 8.94E-04 | CD44,CFB,SELP,SIRPA,SPP1 (includes EG:100359743)                                                    | 5  |
|                                                                                                                                                                                 | systemic lupus erythematosus                                   | 8.94E-04 | CD44,CFB,SELP,SIRPA,SPP1 (includes EG:100359743)                                                    | 5  |
|                                                                                                                                                                                 | accumulation of DNA                                            | 9.16E-04 | HIF1A,OSM                                                                                           | 2  |
|                                                                                                                                                                                 | arrest in cell cycle progression of colon<br>cancer cell lines | 9.16E-04 | CDKN1A,PADI4                                                                                        | 2  |
| Cell Cycle<br>Cellular Movement                                                                                                                                                 | dissemination of tumor cells                                   | 9.16E-04 | CD47,SLPI                                                                                           | 2  |
| Hematological System<br>Development and<br>Function<br>Inflammatory<br>Response<br>Tissue Morphology                                                                            | quantity of Langerhans cells                                   | 9.16E-04 | CD47,SIRPA                                                                                          | 2  |
|                                                                                                                                                                                 | quantity of Langerhans cells                                   | 9.16E-04 | CD47,SIRPA                                                                                          | 2  |
|                                                                                                                                                                                 | quantity of Langerhans cells                                   | 9.16E-04 | CD47,SIRPA                                                                                          | 2  |
| Cellular Movement                                                                                                                                                               | trafficking of antigen presenting cells                        | 9.16E-04 | CCR5,CXCR4                                                                                          | 2  |
| Hematological System<br>Development and<br>Function<br>Immune Cell<br>Trafficking<br>Cellular Movement                                                                          | trafficking of antigen presenting cells                        | 9.16E-04 | CCR5,CXCR4                                                                                          | 2  |
|                                                                                                                                                                                 | trafficking of antigen presenting cells                        | 9.16E-04 | CCR5,CXCR4                                                                                          | 2  |
|                                                                                                                                                                                 | trafficking of phagocytes                                      | 9.16E-04 | CCR5,CXCR4                                                                                          | 2  |
| Hematological System<br>Development and<br>Function<br>Immune Cell<br>Trafficking<br>Inflammatory<br>Response<br>Connective Tissue<br>Disorders<br>Cancer<br>Infectious Disease | trafficking of phagocytes                                      | 9.16E-04 | CCR5,CXCR4                                                                                          | 2  |
|                                                                                                                                                                                 | trafficking of phagocytes                                      | 9.16E-04 | CCR5,CXCR4                                                                                          | 2  |
|                                                                                                                                                                                 | trafficking of phagocytes                                      | 9.16E-04 | CCR5,CXCR4                                                                                          | 2  |
|                                                                                                                                                                                 | tumorigenesis of fibroblasts                                   | 9.16E-04 | CD44,CDKN1A                                                                                         | 2  |
|                                                                                                                                                                                 | tumorigenesis of fibroblasts                                   | 9.16E-04 | CD44,CDKN1A                                                                                         | 2  |
|                                                                                                                                                                                 | viral entry by HIV-1                                           | 9.16E-04 | CCR5,CXCR4                                                                                          | 2  |
| Gene Expression                                                                                                                                                                 | binding of DNA                                                 | 9.16E-04 | CDKN1A,CEBPB (includes EG:1051),HIF1A,IER3,OSM,PTPN1,SLPI,SOAT1,SOCS3 ,SPP1 (includes EG:100359743) | 10 |

|                                                |                                             |          |                                                                                          |   |
|------------------------------------------------|---------------------------------------------|----------|------------------------------------------------------------------------------------------|---|
| Cell-To-Cell Signaling and Interaction         | adhesion of cancer cells                    | 9.66E-04 | CD44,CD47,TGFBI                                                                          | 3 |
| Tissue Development                             | adhesion of cancer cells                    | 9.66E-04 | CD44,CD47,TGFBI                                                                          | 3 |
| Tumor Morphology                               | adhesion of cancer cells                    | 9.66E-04 | CD44,CD47,TGFBI                                                                          | 3 |
| Cellular Compromise                            | adhesion of cancer cells                    | 9.66E-04 | CD44,CD47,TGFBI                                                                          | 3 |
| Cellular Function and Maintenance              | extension of plasma membrane projections    | 9.80E-04 | CCR5,CD44,CDKN1A,INHBA,PLAT                                                              | 5 |
| Cell Morphology                                | extension of plasma membrane projections    | 9.80E-04 | CCR5,CD44,CDKN1A,INHBA,PLAT                                                              | 5 |
| Cellular Assembly and Organization             | extension of plasma membrane projections    | 9.80E-04 | CCR5,CD44,CDKN1A,INHBA,PLAT                                                              | 5 |
| Cardiovascular Disease                         | hypertension                                | 9.80E-04 | CHRN1B,CXCR4,HIF1A,LRIG1,PLAT,PRELID2,SELP                                               | 7 |
| Cellular Function and Maintenance              | ion homeostasis of cells                    | 9.85E-04 | CASP1,CCL7,CCR5,CP,CXCL1,CXCR4,FPR2 (includes EG:100426968),HIF1A,SLC11A1                | 9 |
| Cardiovascular System Development and Function | blood pressure                              | 9.99E-04 | CD44,CD47,HIF1A,IER3,PLAT,PTPN1,SPP1 (includes EG:100359743)                             | 7 |
| Molecular Transport                            | transport of divalent cations               | 1.01E-03 | ATP2A3,CCR5,CORO1A,CP,NIPAL1                                                             | 5 |
| Cellular Development                           | proliferation of fibroblasts                | 1.02E-03 | CD44,CDKN1A,CEBPB (includes EG:1051),HIF1A,OSM,PLAT,SOCS3                                | 7 |
| Cellular Growth and Proliferation              | proliferation of fibroblasts                | 1.02E-03 | CD44,CDKN1A,CEBPB (includes EG:1051),HIF1A,OSM,PLAT,SOCS3                                | 7 |
| Connective Tissue Development and Function     | proliferation of fibroblasts                | 1.02E-03 | CD44,CDKN1A,CEBPB (includes EG:1051),HIF1A,OSM,PLAT,SOCS3                                | 7 |
| Connective Tissue Disorders                    | polyarticular juvenile rheumatoid arthritis | 1.04E-03 | CEBPB (includes EG:1051),FPR2 (includes EG:100426968),OSM,S100A8                         | 4 |
| Inflammatory Disease                           | polyarticular juvenile rheumatoid arthritis | 1.04E-03 | CEBPB (includes EG:1051),FPR2 (includes EG:100426968),OSM,S100A8                         | 4 |
| Skeletal and Muscular Disorders                | polyarticular juvenile rheumatoid arthritis | 1.04E-03 | CEBPB (includes EG:1051),FPR2 (includes EG:100426968),OSM,S100A8                         | 4 |
| Immunological Disease                          | polyarticular juvenile rheumatoid arthritis | 1.04E-03 | CEBPB (includes EG:1051),FPR2 (includes EG:100426968),OSM,S100A8                         | 4 |
| Cellular Movement                              | NK cell migration                           | 1.04E-03 | CCL7,CD44,SELP                                                                           | 3 |
| Hematological System Development and Function  | NK cell migration                           | 1.04E-03 | CCL7,CD44,SELP                                                                           | 3 |
| Immune Cell Trafficking                        | NK cell migration                           | 1.04E-03 | CCL7,CD44,SELP                                                                           | 3 |
| Cell-mediated Immune Response                  | NK cell migration                           | 1.04E-03 | CCL7,CD44,SELP                                                                           | 3 |
| Tissue Development                             | acute inflammation of tissue                | 1.04E-03 | CD44,SELP,SPP1 (includes EG:100359743)                                                   | 3 |
| Hematological System Development and Function  | activation of phagocytes                    | 1.06E-03 | CCL7,CHI3L1,CXCL1,FPR2 (includes EG:100426968),SLC11A1,SLPI,SPP1 (includes EG:100359743) | 7 |
| Immune Cell Trafficking                        | activation of phagocytes                    | 1.06E-03 | CCL7,CHI3L1,CXCL1,FPR2 (includes EG:100426968),SLC11A1,SLPI,SPP1 (includes EG:100359743) | 7 |

|                                               |                                                 |          |                                                                                          |   |
|-----------------------------------------------|-------------------------------------------------|----------|------------------------------------------------------------------------------------------|---|
| Inflammatory Response                         | activation of phagocytes                        | 1.06E-03 | CCL7,CHI3L1,CXCL1,FPR2 (includes EG:100426968),SLC11A1,SLPI,SPP1 (includes EG:100359743) | 7 |
| Cell-To-Cell Signaling and Interaction        | activation of phagocytes                        | 1.06E-03 | CCL7,CHI3L1,CXCL1,FPR2 (includes EG:100426968),SLC11A1,SLPI,SPP1 (includes EG:100359743) | 7 |
| Cell Death and Survival                       | cell death of leukemia cell lines               | 1.06E-03 | CCR5,CD47,CDKN1A,INHBA,MSN,S100A8,TNFRSF18                                               | 7 |
| Cell Death and Survival                       | cell death of breast cancer cell lines          | 1.12E-03 | CASP1,CD44,CD47,CDKN1A,DAB2,HIF1A,IER3                                                   | 7 |
| Cellular Movement                             | migration of melanoma cell lines                | 1.12E-03 | MSN,RAP1GAP,SPP1 (includes EG:100359743)                                                 | 3 |
| Cellular Development                          | proliferation of embryonic stem cells           | 1.12E-03 | CDKN1A,HIF1A,OSM                                                                         | 3 |
| Cellular Growth and Proliferation             | proliferation of embryonic stem cells           | 1.12E-03 | CDKN1A,HIF1A,OSM                                                                         | 3 |
| Embryonic Development                         | proliferation of embryonic stem cells           | 1.12E-03 | CDKN1A,HIF1A,OSM                                                                         | 3 |
| Tissue Morphology                             | abnormal morphology of cervical lymph node      | 1.14E-03 | CDKN1A,SELP                                                                              | 2 |
| Lymphoid Tissue Structure and Development     | abnormal morphology of cervical lymph node      | 1.14E-03 | CDKN1A,SELP                                                                              | 2 |
| Organ Morphology                              | abnormal morphology of cervical lymph node      | 1.14E-03 | CDKN1A,SELP                                                                              | 2 |
| Hematological System Development and Function | activation of effector lymphocytes              | 1.14E-03 | OSM,SLC11A1                                                                              | 2 |
| Immune Cell Trafficking                       | activation of effector lymphocytes              | 1.14E-03 | OSM,SLC11A1                                                                              | 2 |
| Inflammatory Response                         | activation of effector lymphocytes              | 1.14E-03 | OSM,SLC11A1                                                                              | 2 |
| Cell-To-Cell Signaling and Interaction        | activation of effector lymphocytes              | 1.14E-03 | OSM,SLC11A1                                                                              | 2 |
| Cell-To-Cell Signaling and Interaction        | binding of extracellular matrix                 | 1.14E-03 | CD44,THBS2                                                                               | 2 |
| Tissue Development                            | binding of extracellular matrix                 | 1.14E-03 | CD44,THBS2                                                                               | 2 |
| Hematological System Development and Function | cell spreading of B lymphocytes                 | 1.14E-03 | CD47,SAMSN1                                                                              | 2 |
| Cell Morphology                               | cell spreading of B lymphocytes                 | 1.14E-03 | CD47,SAMSN1                                                                              | 2 |
| Humoral Immune Response                       | cell spreading of B lymphocytes                 | 1.14E-03 | CD47,SAMSN1                                                                              | 2 |
| Cellular Development                          | differentiation of granulosa cells              | 1.14E-03 | CEBPB (includes EG:1051),INHBA                                                           | 2 |
| Reproductive System Development and Function  | differentiation of granulosa cells              | 1.14E-03 | CEBPB (includes EG:1051),INHBA                                                           | 2 |
| Cellular Development                          | differentiation of pancreatic cancer cell lines | 1.14E-03 | CEBPB (includes EG:1051),INHBA                                                           | 2 |
| Infectious Disease                            | entrance of HIV-1                               | 1.14E-03 | CCR5,CXCR4                                                                               | 2 |
| Cellular Growth and Proliferation             | formation of syncytia                           | 1.14E-03 | CCR5,CXCR4                                                                               | 2 |

|                                               |                                                 |          |                                                                                  |    |
|-----------------------------------------------|-------------------------------------------------|----------|----------------------------------------------------------------------------------|----|
| Cellular Function and Maintenance             | function of astrocytes                          | 1.14E-03 | CCR5,CP                                                                          | 2  |
| Immunological Disease                         | hypergammaglobulinemia                          | 1.14E-03 | CDKN1A,SIRPA                                                                     | 2  |
| Hematological Disease                         | hypergammaglobulinemia                          | 1.14E-03 | CDKN1A,SIRPA                                                                     | 2  |
| Cell Death and Survival                       | killing of breast cancer cell lines             | 1.14E-03 | CD47,SIRPA                                                                       | 2  |
| Cellular Movement                             | migration of oligodendrocyte precursor cells    | 1.14E-03 | CXCL1,SEMA3F                                                                     | 2  |
| Nervous System Development and Function       | migration of oligodendrocyte precursor cells    | 1.14E-03 | CXCL1,SEMA3F                                                                     | 2  |
| Infectious Disease                            | salmonellosis                                   | 1.14E-03 | CASP1,SLC11A1                                                                    | 2  |
| Cellular Movement                             | transmigration of eosinophils                   | 1.14E-03 | CD47,SIRPA                                                                       | 2  |
| Hematological System Development and Function | transmigration of eosinophils                   | 1.14E-03 | CD47,SIRPA                                                                       | 2  |
| Immune Cell Trafficking                       | transmigration of eosinophils                   | 1.14E-03 | CD47,SIRPA                                                                       | 2  |
| Hypersensitivity Response                     | transmigration of eosinophils                   | 1.14E-03 | CD47,SIRPA                                                                       | 2  |
| Hematological System Development and Function | proliferation of hematopoietic progenitor cells | 1.15E-03 | CDKN1A,CEBPB (includes EG:1051),INHBA,SIRPA,SOCS3,SPP1 (includes EG:100359743)   | 6  |
| Cellular Development                          | proliferation of hematopoietic progenitor cells | 1.15E-03 | CDKN1A,CEBPB (includes EG:1051),INHBA,SIRPA,SOCS3,SPP1 (includes EG:100359743)   | 6  |
| Cellular Growth and Proliferation             | proliferation of hematopoietic progenitor cells | 1.15E-03 | CDKN1A,CEBPB (includes EG:1051),INHBA,SIRPA,SOCS3,SPP1 (includes EG:100359743)   | 6  |
| Hematopoiesis                                 | proliferation of hematopoietic progenitor cells | 1.15E-03 | CDKN1A,CEBPB (includes EG:1051),INHBA,SIRPA,SOCS3,SPP1 (includes EG:100359743)   | 6  |
| Cell Death and Survival                       | apoptosis of cardiomyocytes                     | 1.17E-03 | CASP1,FSTL1,HIF1A,INHBA,SOCS3                                                    | 5  |
| Hematological System Development and Function | binding of lymphocytes                          | 1.18E-03 | CD44,CD47,MSN,RAP1GAP                                                            | 4  |
| Cell-To-Cell Signaling and Interaction        | binding of lymphocytes                          | 1.18E-03 | CD44,CD47,MSN,RAP1GAP                                                            | 4  |
| Hematological System Development and Function | quantity of granulocytes                        | 1.18E-03 | CD47,CDKN1A,FPR2 (includes EG:100426968),FUT4,S100A8,SELP,SOCS3                  | 7  |
| Tissue Morphology                             | quantity of granulocytes                        | 1.18E-03 | CD47,CDKN1A,FPR2 (includes EG:100426968),FUT4,S100A8,SELP,SOCS3                  | 7  |
| Cancer                                        | metastasis                                      | 1.19E-03 | CASP1,CD44,CD47,CDKN1A,CXCL1,CXCR4,DUSP6,HIF1A,PLAT,SPP1 (includes EG:100359743) | 10 |

**Supplementary Table 8: GSEA of *ETV1* Knockdown Profile in LNCaP Cells**

| NAME                                               | SIZE      | ES           | NES          | NOM p-val   | FDR q-val | RANK AT MAX |
|----------------------------------------------------|-----------|--------------|--------------|-------------|-----------|-------------|
| FINETTI_BREAST_CANCER_KINOME_RED                   | 16        | -0.85        | -2.54        | 0.00        | 0         | 0           |
| EGUCHI_CELL_CYCLE_RB1_TARGETS                      | 23        | -0.84        | -2.76        | 0.00        | 0         | 0           |
| REACTOME_ACTIVATION_OF_THE_PRE_REPLICATIVE_COMPLEX | 25        | -0.83        | -2.77        | 0.00        | 0         | 0           |
| <b><i>HIERONYMUS AR SIGNATURE</i></b>              | <b>21</b> | <b>-0.80</b> | <b>-2.49</b> | <b>0.00</b> | <b>0</b>  | <b>0</b>    |
| FARMER_BREAST_CANCER_CLUSTER_2                     | 33        | -0.79        | -2.76        | 0.00        | 0         | 0           |
| REACTOME_ACTIVATION_OF_ATR_IN_RESPONSE_TO_REPLICAT |           |              |              |             |           |             |
| ION_STRESS                                         | 31        | -0.79        | -2.72        | 0.00        | 0         | 0           |
| SMID_BREAST_CANCER_LUMINAL_A_DN                    | 18        | -0.78        | -2.39        | 0.00        | 0         | 0           |
| WHITFIELD_CELL_CYCLE_LITERATURE                    | 44        | -0.77        | -2.98        | 0.00        | 0         | 0           |
| KAMMINGA_EZH2_TARGETS                              | 41        | -0.77        | -2.86        | 0.00        | 0         | 0           |
| BURTON_ADIPOGENESIS_PEAK_AT_16HR                   | 38        | -0.77        | -2.83        | 0.00        | 0         | 0           |
| REACTOME_G1_S_SPECIFIC_TRANSCRIPTION               | 17        | -0.76        | -2.33        | 0.00        | 2.67E-05  | 0.003       |
| KANG_DOXORUBICIN_RESISTANCE_UP                     | 54        | -0.76        | -3.01        | 0.00        | 0         | 0           |
| ISHIDA_E2F_TARGETS                                 | 53        | -0.76        | -3.00        | 0.00        | 0         | 0           |
| GRAHAM_NORMAL_QUIESCENT_VS_NORMAL_DIVIDING_DN      | 87        | -0.76        | -3.33        | 0.00        | 0         | 0           |
| YU_MYC_TARGETS_UP                                  | 42        | -0.75        | -2.87        | 0.00        | 0         | 0           |
| REACTOME_G2_M_CHECKPOINTS                          | 38        | -0.75        | -2.71        | 0.00        | 0         | 0           |
| ZHAN_MULTIPLE_MYELOMA_PR_UP                        | 45        | -0.75        | -2.84        | 0.00        | 0         | 0           |
| FRASOR_RESPONSE_TO_SERM_OR_FULVESTRANT_DN          | 50        | -0.75        | -2.92        | 0.00        | 0         | 0           |
| REACTOME_CYCLIN_A_B1_ASSOCIATED_EVENTS_DURING_G2_  |           |              |              |             |           |             |
| M_TRANSITION                                       | 15        | -0.74        | -2.14        | 0.00        | 6.14E-04  | 0.088       |
| LY_AGING_MIDDLE_DN                                 | 16        | -0.74        | -2.18        | 0.00        | 3.65E-04  | 0.05        |
| ZHANG_TLX_TARGETS_UP                               | 85        | -0.74        | -3.22        | 0.00        | 0         | 0           |
| REN_BOUND_BY_E2F                                   | 60        | -0.73        | -3.00        | 0.00        | 0         | 0           |
| SCHLOSSER_MYC_TARGETS_AND_SERUM_RESPONSE_DN        | 45        | -0.72        | -2.71        | 0.00        | 0         | 0           |
| CROONQUIST_IL6_DEPRIVATION_DN                      | 95        | -0.72        | -3.16        | 0.00        | 0         | 0           |
| REACTOME_DNA_STRAND_ELONGATION                     | 29        | -0.71        | -2.50        | 0.00        | 0         | 0           |
| SOTIRIOU_BREAST_CANCER_GRADE_1_VS_3_UP             | 144       | -0.71        | -3.41        | 0.00        | 0         | 0           |
| CROONQUIST_NRAS_SIGNALING_DN                       | 71        | -0.71        | -3.01        | 0.00        | 0         | 0           |
| PUJANA_BREAST_CANCER_WITH_BRCA1_MUTATED_UP         | 53        | -0.71        | -2.81        | 0.00        | 0         | 0           |
| SCIAN_CELL_CYCLE_TARGETS_OF_TP53_AND_TP73_DN       | 21        | -0.71        | -2.21        | 0.00        | 2.33E-04  | 0.03        |
| SIMBULAN_PARP1_TARGETS_DN                          | 17        | -0.71        | -2.14        | 0.00        | 6.26E-04  | 0.092       |
| KONG_E2F3_TARGETS                                  | 94        | -0.71        | -3.13        | 0.00        | 0         | 0           |
| CHANG_CYCLING_GENES                                | 141       | -0.70        | -3.31        | 0.00        | 0         | 0           |
| ROSTY_CERVICAL_CANCER_PROLIFERATION_CLUSTER        | 139       | -0.69        | -3.21        | 0.00        | 0         | 0           |
| REACTOME_E2F_MEDIATED_REGULATION_OF_DNA_REPLICATI  |           |              |              |             |           |             |
| ON                                                 | 28        | -0.69        | -2.34        | 0.00        | 1.79E-05  | 0.002       |
| GREENBAUM_E2A_TARGETS_UP                           | 33        | -0.69        | -2.42        | 0.00        | 0         | 0           |
| ABRAMSON_INTERACT_WITH_AIRE                        | 42        | -0.68        | -2.51        | 0.00        | 0         | 0           |
| WANG_METASTASIS_OF_BREAST_CANCER_ESR1_UP           | 21        | -0.68        | -2.14        | 0.00        | 5.92E-04  | 0.085       |
| BURTON_ADIPOGENESIS_3                              | 100       | -0.68        | -3.08        | 0.00        | 0         | 0           |
| KAUFFMANN_MELANOMA_RELAPSE_UP                      | 58        | -0.67        | -2.70        | 0.00        | 0         | 0           |
| BURTON_ADIPOGENESIS_PEAK_AT_24HR                   | 40        | -0.67        | -2.50        | 0.00        | 0         | 0           |
| ZHOU_CELL_CYCLE_GENES_IN_IR_RESPONSE_6HR           | 82        | -0.66        | -2.90        | 0.00        | 0         | 0           |
| KOBAYASHI_EGFR_SIGNALING_24HR_DN                   | 242       | -0.66        | -3.34        | 0.00        | 0         | 0           |
| KEGG_DNA_REPLICATION                               | 35        | -0.66        | -2.39        | 0.00        | 0         | 0           |
| VERNELL_RETINOBLASTOMA_PATHWAY_UP                  | 69        | -0.66        | -2.74        | 0.00        | 0         | 0           |
| TANG_SENESCENCE_TP53_TARGETS_DN                    | 56        | -0.65        | -2.63        | 0.00        | 0         | 0           |
| SCHUHMACHER_MYC_TARGETS_UP                         | 77        | -0.65        | -2.74        | 0.00        | 0         | 0           |
| MOLENAAR_TARGETS_OF_CCND1_AND_CDK4_DN              | 54        | -0.64        | -2.54        | 0.00        | 0         | 0           |
| OXFORD_RALA_OR_RALB_TARGETS_UP                     | 48        | -0.64        | -2.47        | 0.00        | 0         | 0           |

|                                                                               |     |       |       |      |          |       |
|-------------------------------------------------------------------------------|-----|-------|-------|------|----------|-------|
| ZHANG_TLX_TARGETS_60HR_DN                                                     | 255 | -0.64 | -3.32 | 0.00 | 0        | 0     |
| SONG_TARGETS_OF_IE86_CMV_PROTEIN                                              | 60  | -0.64 | -2.68 | 0.00 | 0        | 0     |
| REICHERT_MITOSIS_LIN9_TARGETS                                                 | 28  | -0.64 | -2.15 | 0.00 | 5.83E-04 | 0.083 |
| LY_AGING_PREMATURE_DN                                                         | 29  | -0.64 | -2.23 | 0.00 | 1.76E-04 | 0.022 |
| MORI_LARGE_PRE_BII_LYMPHOCYTE_UP                                              | 83  | -0.63 | -2.74 | 0.00 | 0        | 0     |
| WHITEFORD_PEDIATRIC_CANCER_MARKERS                                            | 116 | -0.63 | -2.89 | 0.00 | 0        | 0     |
| ZHOU_CELL_CYCLE_GENES_IN_IR_RESPONSE_24HR                                     | 121 | -0.63 | -2.88 | 0.00 | 0        | 0     |
| MISSIAGLIA_REGULATED_BY_METHYLATION_DN                                        | 112 | -0.63 | -2.84 | 0.00 | 0        | 0     |
| MORI_IMMATURE_B_LYMPHOCYTE_DN                                                 | 89  | -0.62 | -2.74 | 0.00 | 0        | 0     |
| WU_APOPTOSIS_BY_CDKN1A_VIA_TP53                                               | 52  | -0.62 | -2.45 | 0.00 | 0        | 0     |
| ZHANG_TLX_TARGETS_36HR_DN                                                     | 176 | -0.62 | -2.99 | 0.00 | 0        | 0     |
| PUJANA_BRCA_CENTERED_NETWORK                                                  | 115 | -0.62 | -2.82 | 0.00 | 0        | 0     |
| RHODES_UNDIFFERENTIATED_CANCER                                                | 68  | -0.61 | -2.55 | 0.00 | 0        | 0     |
| GRAHAM_CML_DIVIDING_VS_NORMAL QUIESCENT_UP                                    | 177 | -0.61 | -2.94 | 0.00 | 0        | 0     |
| FURUKAWA_DUSP6_TARGETS_PCI35_DN                                               | 68  | -0.61 | -2.52 | 0.00 | 0        | 0     |
| MANALO_HYPOXIA_DN                                                             | 270 | -0.61 | -3.06 | 0.00 | 0        | 0     |
| GARGALOVIC_RESPONSE_TO_OXIDIZED_PHOSPHOLIPIDS_TURQ<br>UOISE_DN                | 51  | -0.61 | -2.39 | 0.00 | 0        | 0     |
| BENPORATH_PROLIFERATION                                                       | 140 | -0.60 | -2.83 | 0.00 | 0        | 0     |
| NAKAMURA_CANCER_MICROENVIRONMENT_DN                                           | 45  | -0.59 | -2.26 | 0.00 | 1.48E-04 | 0.018 |
| DUTERTRE ESTRADIOL_RESPONSE_24HR_UP                                           | 309 | -0.59 | -3.06 | 0.00 | 0        | 0     |
| WINNEPENNINGCKX_MELANOMA_METASTASIS_UP                                        | 150 | -0.58 | -2.83 | 0.00 | 0        | 0     |
| WONG_EMBRYONIC_STEM_CELL_CORE                                                 | 325 | -0.58 | -3.03 | 0.00 | 0        | 0     |
| LEE_EARLY_T_LYMPHOCYTE_UP                                                     | 98  | -0.58 | -2.58 | 0.00 | 0        | 0     |
| YAMASHITA_LIVER_CANCER_WITH_EPCAM_UP                                          | 50  | -0.56 | -2.19 | 0.00 | 3.10E-04 | 0.042 |
| PRAMOONJAGO_SOX4_TARGETS_DN                                                   | 51  | -0.56 | -2.25 | 0.00 | 1.55E-04 | 0.018 |
| ODONNELL_TARGETS_OF_MYC_AND_TFRC_DN                                           | 44  | -0.56 | -2.14 | 0.00 | 6.23E-04 | 0.09  |
| MORI_PRE_BI_LYMPHOCYTE_UP                                                     | 77  | -0.56 | -2.36 | 0.00 | 9.19E-06 | 0.001 |
| REACTOME_DEPOSITION_OF_NEW_CENPA_CONTAINING_NUCL<br>EOSOMES_AT_THE_CENTROMERE | 59  | -0.56 | -2.25 | 0.00 | 1.75E-04 | 0.021 |
| FUJII_YBX1_TARGETS_DN                                                         | 197 | -0.56 | -2.78 | 0.00 | 0        | 0     |
| SCHLOSSER_MYC_TARGETS_REPRESSED_BY_SERUM                                      | 152 | -0.55 | -2.63 | 0.00 | 0        | 0     |
| RUIZ_TNC_TARGETS_DN                                                           | 138 | -0.55 | -2.60 | 0.00 | 0        | 0     |
| MARKEY_RB1_ACUTE_LOF_DN                                                       | 216 | -0.54 | -2.73 | 0.00 | 0        | 0     |
| DANG_REGULATED_BY_MYC_UP                                                      | 67  | -0.54 | -2.24 | 0.00 | 1.73E-04 | 0.021 |
| HESS_TARGETS_OF_HOXA9_AND_MEIS1_UP                                            | 62  | -0.54 | -2.20 | 0.00 | 2.68E-04 | 0.036 |
| SARRIO_EPITHELIAL_MESENCHYMAL_TRANSITION_UP                                   | 166 | -0.54 | -2.58 | 0.00 | 0        | 0     |
| HOFFMANN_LARGE_TO_SMALL_PRE_BII_LYMPHOCYTE_UP                                 | 156 | -0.54 | -2.57 | 0.00 | 0        | 0     |
| SHEDDEN_LUNG_CANCER_POOR_SURVIVAL_A6                                          | 437 | -0.54 | -2.87 | 0.00 | 0        | 0     |
| PUJANA_XPRSS_INT_NETWORK                                                      | 161 | -0.54 | -2.63 | 0.00 | 0        | 0     |
| REACTOME_G1_S_TRANSITION                                                      | 103 | -0.54 | -2.39 | 0.00 | 0        | 0     |
| FERREIRA_EWINGS_SARCOMA_UNSTABLE_VS_STABLE_UP                                 | 158 | -0.53 | -2.55 | 0.00 | 0        | 0     |
| FERRANDO_T_ALL_WITH_MLL_ENL_FUSION_DN                                         | 84  | -0.53 | -2.29 | 0.00 | 9.42E-05 | 0.011 |
| BIDUS_METASTASIS_UP                                                           | 202 | -0.52 | -2.58 | 0.00 | 0        | 0     |
| VEGF_A_UP.V1_DN                                                               | 185 | -0.52 | -2.54 | 0.00 | 0        | 0     |
| LE_EGR2_TARGETS_UP                                                            | 105 | -0.52 | -2.36 | 0.00 | 0        | 0     |
| MORI_MATURE_B_LYMPHOCYTE_DN                                                   | 75  | -0.52 | -2.22 | 0.00 | 1.82E-04 | 0.023 |
| REACTOME_MITOTIC_G1_G1_S_PHASES                                               | 127 | -0.52 | -2.40 | 0.00 | 0        | 0     |
| GAVIN_FOXP3_TARGETS_CLUSTER_P6                                                | 88  | -0.51 | -2.21 | 0.00 | 2.43E-04 | 0.032 |
| REACTOME_MITOTIC_PROMETAPHASE                                                 | 85  | -0.50 | -2.17 | 0.00 | 4.25E-04 | 0.059 |
| CHEMNITZ_RESPONSE_TO_PROSTAGLANDIN_E2_UP                                      | 134 | -0.50 | -2.37 | 0.00 | 0        | 0     |
| REACTOME_MITOTIC_M_M_G1_PHASES                                                | 163 | -0.50 | -2.40 | 0.00 | 0        | 0     |
| REACTOME_DNA_REPLICATION                                                      | 182 | -0.50 | -2.38 | 0.00 | 0        | 0     |



|                                               |     |       |       |      |          |       |
|-----------------------------------------------|-----|-------|-------|------|----------|-------|
| LI_WILMS_TUMOR_VS_FETAL_KIDNEY_1_DN           | 160 | -0.49 | -2.34 | 0.00 | 2.70E-05 | 0.003 |
| KEGG_CELL_CYCLE                               | 118 | -0.49 | -2.24 | 0.00 | 1.72E-04 | 0.021 |
| MUELLER_PLURINET                              | 283 | -0.49 | -2.51 | 0.00 | 0        | 0     |
| HORIUCHI_WTAP_TARGETS_DN                      | 289 | -0.49 | -2.53 | 0.00 | 0        | 0     |
| ODONNELL_TFRC_TARGETS_DN                      | 130 | -0.48 | -2.25 | 0.00 | 1.69E-04 | 0.02  |
| REACTOME_S_PHASE                              | 100 | -0.48 | -2.17 | 0.00 | 4.35E-04 | 0.06  |
| KARLSSON_TGFB1_TARGETS_UP                     | 117 | -0.48 | -2.19 | 0.00 | 3.42E-04 | 0.046 |
| GARCIA_TARGETS_OF_FLI1_AND_DAX1_DN            | 161 | -0.48 | -2.33 | 0.00 | 3.49E-05 | 0.004 |
| REACTOME_CHROMOSOME_MAINTENANCE               | 115 | -0.48 | -2.18 | 0.00 | 3.61E-04 | 0.049 |
| FOURNIER_ACINAR_DEVELOPMENT_LATE_2            | 265 | -0.48 | -2.42 | 0.00 | 0        | 0     |
| LINDGREN_BLADDER_CANCER_CLUSTER_3_UP          | 312 | -0.47 | -2.46 | 0.00 | 0        | 0     |
| REACTOME_CELL_CYCLE_CHECKPOINTS               | 112 | -0.46 | -2.14 | 0.00 | 6.31E-04 | 0.092 |
| PUJANA_BRCA2_PCC_NETWORK                      | 402 | -0.46 | -2.47 | 0.00 | 0        | 0     |
| CHIANG_LIVER_CANCER_SUBCLASS_PROLIFERATION_UP | 169 | -0.46 | -2.24 | 0.00 | 1.70E-04 | 0.021 |
| REACTOME_CELL_CYCLE_MITOTIC                   | 303 | -0.46 | -2.35 | 0.00 | 1.81E-05 | 0.002 |
| VECCHI_GASTRIC_CANCER_EARLY_UP                | 406 | -0.45 | -2.40 | 0.00 | 0        | 0     |
| WHITFIELD_CELL_CYCLE_G2                       | 164 | -0.45 | -2.15 | 0.00 | 5.61E-04 | 0.079 |
| BOYALT_LIVER_CANCER_SUBCLASS_G3_UP            | 186 | -0.45 | -2.21 | 0.00 | 2.31E-04 | 0.03  |
| REACTOME_CELL_CYCLE                           | 393 | -0.44 | -2.37 | 0.00 | 0        | 0     |
| BLUM_RESPONSE_TO_SALIRASIB_DN                 | 324 | -0.44 | -2.28 | 0.00 | 1.18E-04 | 0.014 |
| MITSIADES_RESPONSE_TO_APLIDIN_DN              | 240 | -0.43 | -2.21 | 0.00 | 2.49E-04 | 0.033 |
| WANG_RESPONSE_TO_GSK3_INHIBITOR_SB216763_DN   | 343 | -0.43 | -2.27 | 0.00 | 1.17E-04 | 0.014 |
| RHEIN_ALL_GLUCOCORTICOID_THERAPY_DN           | 351 | -0.43 | -2.29 | 0.00 | 1.11E-04 | 0.013 |

**Supplementary Table 8: GSEA of *ETV1* Knockdown Profile in LNCaP Cells**

| NAME                                               | SIZE      | ES           | NES          | NOM p-val   | FDR q-val | RANK AT MAX |
|----------------------------------------------------|-----------|--------------|--------------|-------------|-----------|-------------|
| FINETTI_BREAST_CANCER_KINOME_RED                   | 16        | -0.85        | -2.54        | 0.00        | 0         | 0           |
| EGUCHI_CELL_CYCLE_RB1_TARGETS                      | 23        | -0.84        | -2.76        | 0.00        | 0         | 0           |
| REACTOME_ACTIVATION_OF_THE_PRE_REPLICATIVE_COMPLEX | 25        | -0.83        | -2.77        | 0.00        | 0         | 0           |
| <b><i>HIERONYMUS AR SIGNATURE</i></b>              | <b>21</b> | <b>-0.80</b> | <b>-2.49</b> | <b>0.00</b> | <b>0</b>  | <b>0</b>    |
| FARMER_BREAST_CANCER_CLUSTER_2                     | 33        | -0.79        | -2.76        | 0.00        | 0         | 0           |
| REACTOME_ACTIVATION_OF_ATR_IN_RESPONSE_TO_REPLICAT |           |              |              |             |           |             |
| ION_STRESS                                         | 31        | -0.79        | -2.72        | 0.00        | 0         | 0           |
| SMID_BREAST_CANCER_LUMINAL_A_DN                    | 18        | -0.78        | -2.39        | 0.00        | 0         | 0           |
| WHITFIELD_CELL_CYCLE_LITERATURE                    | 44        | -0.77        | -2.98        | 0.00        | 0         | 0           |
| KAMMINGA_EZH2_TARGETS                              | 41        | -0.77        | -2.86        | 0.00        | 0         | 0           |
| BURTON_ADIPOGENESIS_PEAK_AT_16HR                   | 38        | -0.77        | -2.83        | 0.00        | 0         | 0           |
| REACTOME_G1_S_SPECIFIC_TRANSCRIPTION               | 17        | -0.76        | -2.33        | 0.00        | 2.67E-05  | 0.003       |
| KANG_DOXORUBICIN_RESISTANCE_UP                     | 54        | -0.76        | -3.01        | 0.00        | 0         | 0           |
| ISHIDA_E2F_TARGETS                                 | 53        | -0.76        | -3.00        | 0.00        | 0         | 0           |
| GRAHAM_NORMAL_QUIESCENT_VS_NORMAL_DIVIDING_DN      | 87        | -0.76        | -3.33        | 0.00        | 0         | 0           |
| YU_MYC_TARGETS_UP                                  | 42        | -0.75        | -2.87        | 0.00        | 0         | 0           |
| REACTOME_G2_M_CHECKPOINTS                          | 38        | -0.75        | -2.71        | 0.00        | 0         | 0           |
| ZHAN_MULTIPLE_MYELOMA_PR_UP                        | 45        | -0.75        | -2.84        | 0.00        | 0         | 0           |
| FRASOR_RESPONSE_TO_SERM_OR_FULVESTRANT_DN          | 50        | -0.75        | -2.92        | 0.00        | 0         | 0           |
| REACTOME_CYCLIN_A_B1_ASSOCIATED_EVENTS_DURING_G2_  |           |              |              |             |           |             |
| M_TRANSITION                                       | 15        | -0.74        | -2.14        | 0.00        | 6.14E-04  | 0.088       |
| LY_AGING_MIDDLE_DN                                 | 16        | -0.74        | -2.18        | 0.00        | 3.65E-04  | 0.05        |
| ZHANG_TLX_TARGETS_UP                               | 85        | -0.74        | -3.22        | 0.00        | 0         | 0           |
| REN_BOUND_BY_E2F                                   | 60        | -0.73        | -3.00        | 0.00        | 0         | 0           |
| SCHLOSSER_MYC_TARGETS_AND_SERUM_RESPONSE_DN        | 45        | -0.72        | -2.71        | 0.00        | 0         | 0           |
| CROONQUIST_IL6_DEPRIVATION_DN                      | 95        | -0.72        | -3.16        | 0.00        | 0         | 0           |
| REACTOME_DNA_STRAND_ELONGATION                     | 29        | -0.71        | -2.50        | 0.00        | 0         | 0           |
| SOTIRIOU_BREAST_CANCER_GRADE_1_VS_3_UP             | 144       | -0.71        | -3.41        | 0.00        | 0         | 0           |
| CROONQUIST_NRAS_SIGNALING_DN                       | 71        | -0.71        | -3.01        | 0.00        | 0         | 0           |
| PUJANA_BREAST_CANCER_WITH_BRCA1_MUTATED_UP         | 53        | -0.71        | -2.81        | 0.00        | 0         | 0           |
| SCIAN_CELL_CYCLE_TARGETS_OF_TP53_AND_TP73_DN       | 21        | -0.71        | -2.21        | 0.00        | 2.33E-04  | 0.03        |
| SIMBULAN_PARP1_TARGETS_DN                          | 17        | -0.71        | -2.14        | 0.00        | 6.26E-04  | 0.092       |
| KONG_E2F3_TARGETS                                  | 94        | -0.71        | -3.13        | 0.00        | 0         | 0           |
| CHANG_CYCLING_GENES                                | 141       | -0.70        | -3.31        | 0.00        | 0         | 0           |
| ROSTY_CERVICAL_CANCER_PROLIFERATION_CLUSTER        | 139       | -0.69        | -3.21        | 0.00        | 0         | 0           |
| REACTOME_E2F_MEDIATED_REGULATION_OF_DNA_REPLICATI  |           |              |              |             |           |             |
| ON                                                 | 28        | -0.69        | -2.34        | 0.00        | 1.79E-05  | 0.002       |
| GREENBAUM_E2A_TARGETS_UP                           | 33        | -0.69        | -2.42        | 0.00        | 0         | 0           |
| ABRAMSON_INTERACT_WITH_AIRE                        | 42        | -0.68        | -2.51        | 0.00        | 0         | 0           |
| WANG_METASTASIS_OF_BREAST_CANCER_ESR1_UP           | 21        | -0.68        | -2.14        | 0.00        | 5.92E-04  | 0.085       |
| BURTON_ADIPOGENESIS_3                              | 100       | -0.68        | -3.08        | 0.00        | 0         | 0           |
| KAUFFMANN_MELANOMA_RELAPSE_UP                      | 58        | -0.67        | -2.70        | 0.00        | 0         | 0           |
| BURTON_ADIPOGENESIS_PEAK_AT_24HR                   | 40        | -0.67        | -2.50        | 0.00        | 0         | 0           |
| ZHOU_CELL_CYCLE_GENES_IN_IR_RESPONSE_6HR           | 82        | -0.66        | -2.90        | 0.00        | 0         | 0           |
| KOBAYASHI_EGFR_SIGNALING_24HR_DN                   | 242       | -0.66        | -3.34        | 0.00        | 0         | 0           |
| KEGG_DNA_REPLICATION                               | 35        | -0.66        | -2.39        | 0.00        | 0         | 0           |
| VERNELL_RETINOBLASTOMA_PATHWAY_UP                  | 69        | -0.66        | -2.74        | 0.00        | 0         | 0           |
| TANG_SENESCENCE_TP53_TARGETS_DN                    | 56        | -0.65        | -2.63        | 0.00        | 0         | 0           |
| SCHUHMACHER_MYC_TARGETS_UP                         | 77        | -0.65        | -2.74        | 0.00        | 0         | 0           |
| MOLENAAR_TARGETS_OF_CCND1_AND_CDK4_DN              | 54        | -0.64        | -2.54        | 0.00        | 0         | 0           |
| OXFORD_RALA_OR_RALB_TARGETS_UP                     | 48        | -0.64        | -2.47        | 0.00        | 0         | 0           |

|                                                                           |     |       |       |      |          |       |
|---------------------------------------------------------------------------|-----|-------|-------|------|----------|-------|
| ZHANG_TLX_TARGETS_60HR_DN                                                 | 255 | -0.64 | -3.32 | 0.00 | 0        | 0     |
| SONG_TARGETS_OF_IE86_CMV_PROTEIN                                          | 60  | -0.64 | -2.68 | 0.00 | 0        | 0     |
| REICHERT_MITOSIS_LIN9_TARGETS                                             | 28  | -0.64 | -2.15 | 0.00 | 5.83E-04 | 0.083 |
| LY_AGING_PREMATURE_DN                                                     | 29  | -0.64 | -2.23 | 0.00 | 1.76E-04 | 0.022 |
| MORI_LARGE_PRE_BII_LYMPHOCYTE_UP                                          | 83  | -0.63 | -2.74 | 0.00 | 0        | 0     |
| WHITEFORD_PEDIATRIC_CANCER_MARKERS                                        | 116 | -0.63 | -2.89 | 0.00 | 0        | 0     |
| ZHOU_CELL_CYCLE_GENES_IN_IR_RESPONSE_24HR                                 | 121 | -0.63 | -2.88 | 0.00 | 0        | 0     |
| MISSIAGLIA_REGULATED_BY_METHYLATION_DN                                    | 112 | -0.63 | -2.84 | 0.00 | 0        | 0     |
| MORI_IMMATURE_B_LYMPHOCYTE_DN                                             | 89  | -0.62 | -2.74 | 0.00 | 0        | 0     |
| WU_APOPTOSIS_BY_CDKN1A_VIA_TP53                                           | 52  | -0.62 | -2.45 | 0.00 | 0        | 0     |
| ZHANG_TLX_TARGETS_36HR_DN                                                 | 176 | -0.62 | -2.99 | 0.00 | 0        | 0     |
| PUJANA_BRCA_CENTERED_NETWORK                                              | 115 | -0.62 | -2.82 | 0.00 | 0        | 0     |
| RHODES_UNDIFFERENTIATED_CANCER                                            | 68  | -0.61 | -2.55 | 0.00 | 0        | 0     |
| GRAHAM_CML_DIVIDING_VS_NORMAL QUIESCENT_UP                                | 177 | -0.61 | -2.94 | 0.00 | 0        | 0     |
| FURUKAWA_DUSP6_TARGETS_PCI35_DN                                           | 68  | -0.61 | -2.52 | 0.00 | 0        | 0     |
| MANALO_HYPOXIA_DN                                                         | 270 | -0.61 | -3.06 | 0.00 | 0        | 0     |
| GARGALOVIC_RESPONSE_TO_OXIDIZED_PHOSPHOLIPIDS_TURQUOISE_DN                | 51  | -0.61 | -2.39 | 0.00 | 0        | 0     |
| BENPORATH_PROLIFERATION                                                   | 140 | -0.60 | -2.83 | 0.00 | 0        | 0     |
| NAKAMURA_CANCER_MICROENVIRONMENT_DN                                       | 45  | -0.59 | -2.26 | 0.00 | 1.48E-04 | 0.018 |
| DUTERTRE ESTRADIOL_RESPONSE_24HR_UP                                       | 309 | -0.59 | -3.06 | 0.00 | 0        | 0     |
| WINNEPENNINGX_MELANOMA_METASTASIS_UP                                      | 150 | -0.58 | -2.83 | 0.00 | 0        | 0     |
| WONG_EMBRYONIC_STEM_CELL_CORE                                             | 325 | -0.58 | -3.03 | 0.00 | 0        | 0     |
| LEE_EARLY_T_LYMPHOCYTE_UP                                                 | 98  | -0.58 | -2.58 | 0.00 | 0        | 0     |
| YAMASHITA_LIVER_CANCER_WITH_EPCAM_UP                                      | 50  | -0.56 | -2.19 | 0.00 | 3.10E-04 | 0.042 |
| PRAMOONJAGO_SOX4_TARGETS_DN                                               | 51  | -0.56 | -2.25 | 0.00 | 1.55E-04 | 0.018 |
| ODONNELL_TARGETS_OF_MYC_AND_TFRC_DN                                       | 44  | -0.56 | -2.14 | 0.00 | 6.23E-04 | 0.09  |
| MORI_PRE_BI_LYMPHOCYTE_UP                                                 | 77  | -0.56 | -2.36 | 0.00 | 9.19E-06 | 0.001 |
| REACTOME_DEPOSITION_OF_NEW_CENPA_CONTAINING_NUCLEOSOMES_AT_THE_CENTROMERE | 59  | -0.56 | -2.25 | 0.00 | 1.75E-04 | 0.021 |
| FUJII_YBX1_TARGETS_DN                                                     | 197 | -0.56 | -2.78 | 0.00 | 0        | 0     |
| SCHLOSSER_MYC_TARGETS_REPRESSED_BY_SERUM                                  | 152 | -0.55 | -2.63 | 0.00 | 0        | 0     |
| RUIZ_TNC_TARGETS_DN                                                       | 138 | -0.55 | -2.60 | 0.00 | 0        | 0     |
| MARKEY_RB1_ACUTE_LOF_DN                                                   | 216 | -0.54 | -2.73 | 0.00 | 0        | 0     |
| DANG_REGULATED_BY_MYC_UP                                                  | 67  | -0.54 | -2.24 | 0.00 | 1.73E-04 | 0.021 |
| HESS_TARGETS_OF_HOXA9_AND_MEIS1_UP                                        | 62  | -0.54 | -2.20 | 0.00 | 2.68E-04 | 0.036 |
| SARRIO_EPITHELIAL_MESENCHYMAL_TRANSITION_UP                               | 166 | -0.54 | -2.58 | 0.00 | 0        | 0     |
| HOFFMANN_LARGE_TO_SMALL_PRE_BII_LYMPHOCYTE_UP                             | 156 | -0.54 | -2.57 | 0.00 | 0        | 0     |
| SHEDDEN_LUNG_CANCER_POOR_SURVIVAL_A6                                      | 437 | -0.54 | -2.87 | 0.00 | 0        | 0     |
| PUJANA_XPRSS_INT_NETWORK                                                  | 161 | -0.54 | -2.63 | 0.00 | 0        | 0     |
| REACTOME_G1_S_TRANSITION                                                  | 103 | -0.54 | -2.39 | 0.00 | 0        | 0     |
| FERREIRA_EWINGS_SARCOMA_UNSTABLE_VS_STABLE_UP                             | 158 | -0.53 | -2.55 | 0.00 | 0        | 0     |
| FERRANDO_T_ALL_WITH_MLL_ENL_FUSION_DN                                     | 84  | -0.53 | -2.29 | 0.00 | 9.42E-05 | 0.011 |
| BIDUS_METASTASIS_UP                                                       | 202 | -0.52 | -2.58 | 0.00 | 0        | 0     |
| VEGF_A_UP.V1_DN                                                           | 185 | -0.52 | -2.54 | 0.00 | 0        | 0     |
| LE_EGR2_TARGETS_UP                                                        | 105 | -0.52 | -2.36 | 0.00 | 0        | 0     |
| MORI_MATURE_B_LYMPHOCYTE_DN                                               | 75  | -0.52 | -2.22 | 0.00 | 1.82E-04 | 0.023 |
| REACTOME_MITOTIC_G1_G1_S_PHASES                                           | 127 | -0.52 | -2.40 | 0.00 | 0        | 0     |
| GAVIN_FOXP3_TARGETS_CLUSTER_P6                                            | 88  | -0.51 | -2.21 | 0.00 | 2.43E-04 | 0.032 |
| REACTOME_MITOTIC_PROMETAPHASE                                             | 85  | -0.50 | -2.17 | 0.00 | 4.25E-04 | 0.059 |
| CHEMNITZ_RESPONSE_TO_PROSTAGLANDIN_E2_UP                                  | 134 | -0.50 | -2.37 | 0.00 | 0        | 0     |
| REACTOME_MITOTIC_M_M_G1_PHASES                                            | 163 | -0.50 | -2.40 | 0.00 | 0        | 0     |
| REACTOME_DNA_REPLICATION                                                  | 182 | -0.50 | -2.38 | 0.00 | 0        | 0     |

|                                               |     |       |       |      |          |       |
|-----------------------------------------------|-----|-------|-------|------|----------|-------|
| LI_WILMS_TUMOR_VS_FETAL_KIDNEY_1_DN           | 160 | -0.49 | -2.34 | 0.00 | 2.70E-05 | 0.003 |
| KEGG_CELL_CYCLE                               | 118 | -0.49 | -2.24 | 0.00 | 1.72E-04 | 0.021 |
| MUELLER_PLURINET                              | 283 | -0.49 | -2.51 | 0.00 | 0        | 0     |
| HORIUCHI_WTAP_TARGETS_DN                      | 289 | -0.49 | -2.53 | 0.00 | 0        | 0     |
| ODONNELL_TFRC_TARGETS_DN                      | 130 | -0.48 | -2.25 | 0.00 | 1.69E-04 | 0.02  |
| REACTOME_S_PHASE                              | 100 | -0.48 | -2.17 | 0.00 | 4.35E-04 | 0.06  |
| KARLSSON_TGFB1_TARGETS_UP                     | 117 | -0.48 | -2.19 | 0.00 | 3.42E-04 | 0.046 |
| GARCIA_TARGETS_OF_FLI1_AND_DAX1_DN            | 161 | -0.48 | -2.33 | 0.00 | 3.49E-05 | 0.004 |
| REACTOME_CHROMOSOME_MAINTENANCE               | 115 | -0.48 | -2.18 | 0.00 | 3.61E-04 | 0.049 |
| FOURNIER_ACINAR_DEVELOPMENT_LATE_2            | 265 | -0.48 | -2.42 | 0.00 | 0        | 0     |
| LINDGREN_BLADDER_CANCER_CLUSTER_3_UP          | 312 | -0.47 | -2.46 | 0.00 | 0        | 0     |
| REACTOME_CELL_CYCLE_CHECKPOINTS               | 112 | -0.46 | -2.14 | 0.00 | 6.31E-04 | 0.092 |
| PUJANA_BRCA2_PCC_NETWORK                      | 402 | -0.46 | -2.47 | 0.00 | 0        | 0     |
| CHIANG_LIVER_CANCER_SUBCLASS_PROLIFERATION_UP | 169 | -0.46 | -2.24 | 0.00 | 1.70E-04 | 0.021 |
| REACTOME_CELL_CYCLE_MITOTIC                   | 303 | -0.46 | -2.35 | 0.00 | 1.81E-05 | 0.002 |
| VECCHI_GASTRIC_CANCER_EARLY_UP                | 406 | -0.45 | -2.40 | 0.00 | 0        | 0     |
| WHITFIELD_CELL_CYCLE_G2                       | 164 | -0.45 | -2.15 | 0.00 | 5.61E-04 | 0.079 |
| BOYALT_LIVER_CANCER_SUBCLASS_G3_UP            | 186 | -0.45 | -2.21 | 0.00 | 2.31E-04 | 0.03  |
| REACTOME_CELL_CYCLE                           | 393 | -0.44 | -2.37 | 0.00 | 0        | 0     |
| BLUM_RESPONSE_TO_SALIRASIB_DN                 | 324 | -0.44 | -2.28 | 0.00 | 1.18E-04 | 0.014 |
| MITSIADES_RESPONSE_TO_APLIDIN_DN              | 240 | -0.43 | -2.21 | 0.00 | 2.49E-04 | 0.033 |
| WANG_RESPONSE_TO_GSK3_INHIBITOR_SB216763_DN   | 343 | -0.43 | -2.27 | 0.00 | 1.17E-04 | 0.014 |
| RHEIN_ALL_GLUCOCORTICOID_THERAPY_DN           | 351 | -0.43 | -2.29 | 0.00 | 1.11E-04 | 0.013 |

**Supplementary Table 8: GSEA of *ETV1* Knockdown Profile in LNCaP Cells**

| NAME                                               | SIZE      | ES           | NES          | NOM p-val   | FDR q-val | RANK AT MAX |
|----------------------------------------------------|-----------|--------------|--------------|-------------|-----------|-------------|
| FINETTI_BREAST_CANCER_KINOME_RED                   | 16        | -0.85        | -2.54        | 0.00        | 0         | 0           |
| EGUCHI_CELL_CYCLE_RB1_TARGETS                      | 23        | -0.84        | -2.76        | 0.00        | 0         | 0           |
| REACTOME_ACTIVATION_OF_THE_PRE_REPLICATIVE_COMPLEX | 25        | -0.83        | -2.77        | 0.00        | 0         | 0           |
| <b><i>HIERONYMUS AR SIGNATURE</i></b>              | <b>21</b> | <b>-0.80</b> | <b>-2.49</b> | <b>0.00</b> | <b>0</b>  | <b>0</b>    |
| FARMER_BREAST_CANCER_CLUSTER_2                     | 33        | -0.79        | -2.76        | 0.00        | 0         | 0           |
| REACTOME_ACTIVATION_OF_ATR_IN_RESPONSE_TO_REPLICAT |           |              |              |             |           |             |
| ION_STRESS                                         | 31        | -0.79        | -2.72        | 0.00        | 0         | 0           |
| SMID_BREAST_CANCER_LUMINAL_A_DN                    | 18        | -0.78        | -2.39        | 0.00        | 0         | 0           |
| WHITFIELD_CELL_CYCLE_LITERATURE                    | 44        | -0.77        | -2.98        | 0.00        | 0         | 0           |
| KAMMINGA_EZH2_TARGETS                              | 41        | -0.77        | -2.86        | 0.00        | 0         | 0           |
| BURTON_ADIPOGENESIS_PEAK_AT_16HR                   | 38        | -0.77        | -2.83        | 0.00        | 0         | 0           |
| REACTOME_G1_S_SPECIFIC_TRANSCRIPTION               | 17        | -0.76        | -2.33        | 0.00        | 2.67E-05  | 0.003       |
| KANG_DOXORUBICIN_RESISTANCE_UP                     | 54        | -0.76        | -3.01        | 0.00        | 0         | 0           |
| ISHIDA_E2F_TARGETS                                 | 53        | -0.76        | -3.00        | 0.00        | 0         | 0           |
| GRAHAM_NORMAL QUIESCENT_VS_NORMAL_DIVIDING_DN      | 87        | -0.76        | -3.33        | 0.00        | 0         | 0           |
| YU_MYC_TARGETS_UP                                  | 42        | -0.75        | -2.87        | 0.00        | 0         | 0           |
| REACTOME_G2_M_CHECKPOINTS                          | 38        | -0.75        | -2.71        | 0.00        | 0         | 0           |
| ZHAN_MULTIPLE_MYELOMA_PR_UP                        | 45        | -0.75        | -2.84        | 0.00        | 0         | 0           |
| FRASOR_RESPONSE_TO_SERM_OR_FULVESTRANT_DN          | 50        | -0.75        | -2.92        | 0.00        | 0         | 0           |
| REACTOME_CYCLIN_A_B1_ASSOCIATED_EVENTS_DURING_G2_  |           |              |              |             |           |             |
| M_TRANSITION                                       | 15        | -0.74        | -2.14        | 0.00        | 6.14E-04  | 0.088       |
| LY_AGING_MIDDLE_DN                                 | 16        | -0.74        | -2.18        | 0.00        | 3.65E-04  | 0.05        |
| ZHANG_TLX_TARGETS_UP                               | 85        | -0.74        | -3.22        | 0.00        | 0         | 0           |
| REN_BOUND_BY_E2F                                   | 60        | -0.73        | -3.00        | 0.00        | 0         | 0           |
| SCHLOSSER_MYC_TARGETS_AND_SERUM_RESPONSE_DN        | 45        | -0.72        | -2.71        | 0.00        | 0         | 0           |
| CROONQUIST_IL6_DEPRIVATION_DN                      | 95        | -0.72        | -3.16        | 0.00        | 0         | 0           |
| REACTOME_DNA_STRAND_ELONGATION                     | 29        | -0.71        | -2.50        | 0.00        | 0         | 0           |
| SOTIRIOU_BREAST_CANCER_GRADE_1_VS_3_UP             | 144       | -0.71        | -3.41        | 0.00        | 0         | 0           |
| CROONQUIST_NRAS_SIGNALING_DN                       | 71        | -0.71        | -3.01        | 0.00        | 0         | 0           |
| PUJANA_BREAST_CANCER_WITH_BRCA1_MUTATED_UP         | 53        | -0.71        | -2.81        | 0.00        | 0         | 0           |
| SCIAN_CELL_CYCLE_TARGETS_OF_TP53_AND_TP73_DN       | 21        | -0.71        | -2.21        | 0.00        | 2.33E-04  | 0.03        |
| SIMBULAN_PARP1_TARGETS_DN                          | 17        | -0.71        | -2.14        | 0.00        | 6.26E-04  | 0.092       |
| KONG_E2F3_TARGETS                                  | 94        | -0.71        | -3.13        | 0.00        | 0         | 0           |
| CHANG_CYCLING_GENES                                | 141       | -0.70        | -3.31        | 0.00        | 0         | 0           |
| ROSTY_CERVICAL_CANCER_PROLIFERATION_CLUSTER        | 139       | -0.69        | -3.21        | 0.00        | 0         | 0           |
| REACTOME_E2F_MEDIATED_REGULATION_OF_DNA_REPLICATI  |           |              |              |             |           |             |
| ON                                                 | 28        | -0.69        | -2.34        | 0.00        | 1.79E-05  | 0.002       |
| GREENBAUM_E2A_TARGETS_UP                           | 33        | -0.69        | -2.42        | 0.00        | 0         | 0           |
| ABRAMSON_INTERACT_WITH_AIRE                        | 42        | -0.68        | -2.51        | 0.00        | 0         | 0           |
| WANG_METASTASIS_OF_BREAST_CANCER_ESR1_UP           | 21        | -0.68        | -2.14        | 0.00        | 5.92E-04  | 0.085       |
| BURTON_ADIPOGENESIS_3                              | 100       | -0.68        | -3.08        | 0.00        | 0         | 0           |
| KAUFFMANN_MELANOMA_RELAPSE_UP                      | 58        | -0.67        | -2.70        | 0.00        | 0         | 0           |
| BURTON_ADIPOGENESIS_PEAK_AT_24HR                   | 40        | -0.67        | -2.50        | 0.00        | 0         | 0           |
| ZHOU_CELL_CYCLE_GENES_IN_IR_RESPONSE_6HR           | 82        | -0.66        | -2.90        | 0.00        | 0         | 0           |
| KOBAYASHI_EGFR_SIGNALING_24HR_DN                   | 242       | -0.66        | -3.34        | 0.00        | 0         | 0           |
| KEGG_DNA_REPLICATION                               | 35        | -0.66        | -2.39        | 0.00        | 0         | 0           |
| VERNELL_RETINOBLASTOMA_PATHWAY_UP                  | 69        | -0.66        | -2.74        | 0.00        | 0         | 0           |
| TANG_SENESCENCE_TP53_TARGETS_DN                    | 56        | -0.65        | -2.63        | 0.00        | 0         | 0           |
| SCHUHMACHER_MYC_TARGETS_UP                         | 77        | -0.65        | -2.74        | 0.00        | 0         | 0           |
| MOLENAAR_TARGETS_OF_CCND1_AND_CDK4_DN              | 54        | -0.64        | -2.54        | 0.00        | 0         | 0           |
| OXFORD_RALA_OR_RALB_TARGETS_UP                     | 48        | -0.64        | -2.47        | 0.00        | 0         | 0           |

|                                                                               |     |       |       |      |          |       |
|-------------------------------------------------------------------------------|-----|-------|-------|------|----------|-------|
| ZHANG_TLX_TARGETS_60HR_DN                                                     | 255 | -0.64 | -3.32 | 0.00 | 0        | 0     |
| SONG_TARGETS_OF_IE86_CMV_PROTEIN                                              | 60  | -0.64 | -2.68 | 0.00 | 0        | 0     |
| REICHERT_MITOSIS_LIN9_TARGETS                                                 | 28  | -0.64 | -2.15 | 0.00 | 5.83E-04 | 0.083 |
| LY_AGING_PREMATURE_DN                                                         | 29  | -0.64 | -2.23 | 0.00 | 1.76E-04 | 0.022 |
| MORI_LARGE_PRE_BII_LYMPHOCYTE_UP                                              | 83  | -0.63 | -2.74 | 0.00 | 0        | 0     |
| WHITEFORD_PEDIATRIC_CANCER_MARKERS                                            | 116 | -0.63 | -2.89 | 0.00 | 0        | 0     |
| ZHOU_CELL_CYCLE_GENES_IN_IR_RESPONSE_24HR                                     | 121 | -0.63 | -2.88 | 0.00 | 0        | 0     |
| MISSIAGLIA_REGULATED_BY_METHYLATION_DN                                        | 112 | -0.63 | -2.84 | 0.00 | 0        | 0     |
| MORI_IMMATURE_B_LYMPHOCYTE_DN                                                 | 89  | -0.62 | -2.74 | 0.00 | 0        | 0     |
| WU_APOPTOSIS_BY_CDKN1A_VIA_TP53                                               | 52  | -0.62 | -2.45 | 0.00 | 0        | 0     |
| ZHANG_TLX_TARGETS_36HR_DN                                                     | 176 | -0.62 | -2.99 | 0.00 | 0        | 0     |
| PUJANA_BRCA_CENTERED_NETWORK                                                  | 115 | -0.62 | -2.82 | 0.00 | 0        | 0     |
| RHODES_UNDIFFERENTIATED_CANCER                                                | 68  | -0.61 | -2.55 | 0.00 | 0        | 0     |
| GRAHAM_CML_DIVIDING_VS_NORMAL QUIESCENT_UP                                    | 177 | -0.61 | -2.94 | 0.00 | 0        | 0     |
| FURUKAWA_DUSP6_TARGETS_PCI35_DN                                               | 68  | -0.61 | -2.52 | 0.00 | 0        | 0     |
| MANALO_HYPOXIA_DN                                                             | 270 | -0.61 | -3.06 | 0.00 | 0        | 0     |
| GARGALOVIC_RESPONSE_TO_OXIDIZED_PHOSPHOLIPIDS_TURQ<br>UOISE_DN                | 51  | -0.61 | -2.39 | 0.00 | 0        | 0     |
| BENPORATH_PROLIFERATION                                                       | 140 | -0.60 | -2.83 | 0.00 | 0        | 0     |
| NAKAMURA_CANCER_MICROENVIRONMENT_DN                                           | 45  | -0.59 | -2.26 | 0.00 | 1.48E-04 | 0.018 |
| DUTERTRE ESTRADIOL_RESPONSE_24HR_UP                                           | 309 | -0.59 | -3.06 | 0.00 | 0        | 0     |
| WINNEPENNINGCKX_MELANOMA_METASTASIS_UP                                        | 150 | -0.58 | -2.83 | 0.00 | 0        | 0     |
| WONG_EMBRYONIC_STEM_CELL_CORE                                                 | 325 | -0.58 | -3.03 | 0.00 | 0        | 0     |
| LEE_EARLY_T_LYMPHOCYTE_UP                                                     | 98  | -0.58 | -2.58 | 0.00 | 0        | 0     |
| YAMASHITA_LIVER_CANCER_WITH_EPCAM_UP                                          | 50  | -0.56 | -2.19 | 0.00 | 3.10E-04 | 0.042 |
| PRAMOONJAGO_SOX4_TARGETS_DN                                                   | 51  | -0.56 | -2.25 | 0.00 | 1.55E-04 | 0.018 |
| ODONNELL_TARGETS_OF_MYC_AND_TFRC_DN                                           | 44  | -0.56 | -2.14 | 0.00 | 6.23E-04 | 0.09  |
| MORI_PRE_BI_LYMPHOCYTE_UP                                                     | 77  | -0.56 | -2.36 | 0.00 | 9.19E-06 | 0.001 |
| REACTOME_DEPOSITION_OF_NEW_CENPA_CONTAINING_NUCL<br>EOSOMES_AT_THE_CENTROMERE | 59  | -0.56 | -2.25 | 0.00 | 1.75E-04 | 0.021 |
| FUJII_YBX1_TARGETS_DN                                                         | 197 | -0.56 | -2.78 | 0.00 | 0        | 0     |
| SCHLOSSER_MYC_TARGETS_REPRESSED_BY_SERUM                                      | 152 | -0.55 | -2.63 | 0.00 | 0        | 0     |
| RUIZ_TNC_TARGETS_DN                                                           | 138 | -0.55 | -2.60 | 0.00 | 0        | 0     |
| MARKEY_RB1_ACUTE_LOF_DN                                                       | 216 | -0.54 | -2.73 | 0.00 | 0        | 0     |
| DANG_REGULATED_BY_MYC_UP                                                      | 67  | -0.54 | -2.24 | 0.00 | 1.73E-04 | 0.021 |
| HESS_TARGETS_OF_HOXA9_AND_MEIS1_UP                                            | 62  | -0.54 | -2.20 | 0.00 | 2.68E-04 | 0.036 |
| SARRIO_EPITHELIAL_MESENCHYMAL_TRANSITION_UP                                   | 166 | -0.54 | -2.58 | 0.00 | 0        | 0     |
| HOFFMANN_LARGE_TO_SMALL_PRE_BII_LYMPHOCYTE_UP                                 | 156 | -0.54 | -2.57 | 0.00 | 0        | 0     |
| SHEDDEN_LUNG_CANCER_POOR_SURVIVAL_A6                                          | 437 | -0.54 | -2.87 | 0.00 | 0        | 0     |
| PUJANA_XPRSS_INT_NETWORK                                                      | 161 | -0.54 | -2.63 | 0.00 | 0        | 0     |
| REACTOME_G1_S_TRANSITION                                                      | 103 | -0.54 | -2.39 | 0.00 | 0        | 0     |
| FERREIRA_EWINGS_SARCOMA_UNSTABLE_VS_STABLE_UP                                 | 158 | -0.53 | -2.55 | 0.00 | 0        | 0     |
| FERRANDO_T_ALL_WITH_MLL_ENL_FUSION_DN                                         | 84  | -0.53 | -2.29 | 0.00 | 9.42E-05 | 0.011 |
| BIDUS_METASTASIS_UP                                                           | 202 | -0.52 | -2.58 | 0.00 | 0        | 0     |
| VEGF_A_UP.V1_DN                                                               | 185 | -0.52 | -2.54 | 0.00 | 0        | 0     |
| LE_EGR2_TARGETS_UP                                                            | 105 | -0.52 | -2.36 | 0.00 | 0        | 0     |
| MORI_MATURE_B_LYMPHOCYTE_DN                                                   | 75  | -0.52 | -2.22 | 0.00 | 1.82E-04 | 0.023 |
| REACTOME_MITOTIC_G1_G1_S_PHASES                                               | 127 | -0.52 | -2.40 | 0.00 | 0        | 0     |
| GAVIN_FOXP3_TARGETS_CLUSTER_P6                                                | 88  | -0.51 | -2.21 | 0.00 | 2.43E-04 | 0.032 |
| REACTOME_MITOTIC_PROMETAPHASE                                                 | 85  | -0.50 | -2.17 | 0.00 | 4.25E-04 | 0.059 |
| CHEMNITZ_RESPONSE_TO_PROSTAGLANDIN_E2_UP                                      | 134 | -0.50 | -2.37 | 0.00 | 0        | 0     |
| REACTOME_MITOTIC_M_M_G1_PHASES                                                | 163 | -0.50 | -2.40 | 0.00 | 0        | 0     |
| REACTOME_DNA_REPLICATION                                                      | 182 | -0.50 | -2.38 | 0.00 | 0        | 0     |

|                                               |     |       |       |      |          |       |
|-----------------------------------------------|-----|-------|-------|------|----------|-------|
| LI_WILMS_TUMOR_VS_FETAL_KIDNEY_1_DN           | 160 | -0.49 | -2.34 | 0.00 | 2.70E-05 | 0.003 |
| KEGG_CELL_CYCLE                               | 118 | -0.49 | -2.24 | 0.00 | 1.72E-04 | 0.021 |
| MUELLER_PLURINET                              | 283 | -0.49 | -2.51 | 0.00 | 0        | 0     |
| HORIUCHI_WTAP_TARGETS_DN                      | 289 | -0.49 | -2.53 | 0.00 | 0        | 0     |
| ODONNELL_TFRC_TARGETS_DN                      | 130 | -0.48 | -2.25 | 0.00 | 1.69E-04 | 0.02  |
| REACTOME_S_PHASE                              | 100 | -0.48 | -2.17 | 0.00 | 4.35E-04 | 0.06  |
| KARLSSON_TGFB1_TARGETS_UP                     | 117 | -0.48 | -2.19 | 0.00 | 3.42E-04 | 0.046 |
| GARCIA_TARGETS_OF_FLI1_AND_DAX1_DN            | 161 | -0.48 | -2.33 | 0.00 | 3.49E-05 | 0.004 |
| REACTOME_CHROMOSOME_MAINTENANCE               | 115 | -0.48 | -2.18 | 0.00 | 3.61E-04 | 0.049 |
| FOURNIER_ACINAR_DEVELOPMENT_LATE_2            | 265 | -0.48 | -2.42 | 0.00 | 0        | 0     |
| LINDGREN_BLADDER_CANCER_CLUSTER_3_UP          | 312 | -0.47 | -2.46 | 0.00 | 0        | 0     |
| REACTOME_CELL_CYCLE_CHECKPOINTS               | 112 | -0.46 | -2.14 | 0.00 | 6.31E-04 | 0.092 |
| PUJANA_BRCA2_PCC_NETWORK                      | 402 | -0.46 | -2.47 | 0.00 | 0        | 0     |
| CHIANG_LIVER_CANCER_SUBCLASS_PROLIFERATION_UP | 169 | -0.46 | -2.24 | 0.00 | 1.70E-04 | 0.021 |
| REACTOME_CELL_CYCLE_MITOTIC                   | 303 | -0.46 | -2.35 | 0.00 | 1.81E-05 | 0.002 |
| VECCHI_GASTRIC_CANCER_EARLY_UP                | 406 | -0.45 | -2.40 | 0.00 | 0        | 0     |
| WHITFIELD_CELL_CYCLE_G2                       | 164 | -0.45 | -2.15 | 0.00 | 5.61E-04 | 0.079 |
| BOYALT_LIVER_CANCER_SUBCLASS_G3_UP            | 186 | -0.45 | -2.21 | 0.00 | 2.31E-04 | 0.03  |
| REACTOME_CELL_CYCLE                           | 393 | -0.44 | -2.37 | 0.00 | 0        | 0     |
| BLUM_RESPONSE_TO_SALIRASIB_DN                 | 324 | -0.44 | -2.28 | 0.00 | 1.18E-04 | 0.014 |
| MITSIADES_RESPONSE_TO_APLIDIN_DN              | 240 | -0.43 | -2.21 | 0.00 | 2.49E-04 | 0.033 |
| WANG_RESPONSE_TO_GSK3_INHIBITOR_SB216763_DN   | 343 | -0.43 | -2.27 | 0.00 | 1.17E-04 | 0.014 |
| RHEIN_ALL_GLUCOCORTICOID_THERAPY_DN           | 351 | -0.43 | -2.29 | 0.00 | 1.11E-04 | 0.013 |
